# Supplementary material for: Individual differences in honey bee behavior enabled by plasticity in brain gene regulatory networks
Source: bioRxiv preprint, doi:10.1101/2020.09.09.289272, version 2 (2020-12-12)
Supplement: Supplemental File 3 [file 289272_file05.xlsx]

## Sheet: Sheet1
Universe	FvsL	F>L	L>F	FvsG	F>G	G>F	GvsL	G>L	L>G		geneID	NCBI_ID	name	description			F vs. L DEGs, GO enrichment results						F>L DEGs, , GO enrichment results						L>F DEGs, , GO enrichment results						F vs. G DEGs, GO enrichment results						F>G DEGs, GO enrichment results						G>F DEGs, GO enrichment results
gene9987	gene9987	gene8507	gene5572	gene6303	gene1684	gene8896	gene2038	gene2038	gene1564		gene9987	410059	LOC410059	probable citrate synthase 2, mitochondrial
gene8266	gene8266	gene6609	gene7767	gene7756	gene2222	gene5814	gene9987	gene11457	gene3328		gene8266	410197	Cry2	cryptochrome 2 isoform X1			GO term	Description	P-value	FDR q-value	Enrichment (N, B, n, b)		GO term	Description	P-value	FDR q-value	Enrichment (N, B, n, b)		GO term	Description	P-value	FDR q-value	Enrichment (N, B, n, b)		GO term	Description	P-value	FDR q-value	Enrichment (N, B, n, b)		GO term	Description	P-value	FDR q-value	Enrichment (N, B, n, b)		GO term	Description	P-value
gene2108	gene2108	gene2038	gene4458	gene10501	gene623	gene2746	gene8266	gene6262	gene7950		gene2108	406113	Eaat-2	excitatory amino acid transporter 2 isoform X1			GO:0002181	cytoplasmic translation	4.71e-06	0.0339	1.53 (6070,83,2828,59)		GO:1902600	proton transmembrane transport	4.01e-13	2.88e-09	3.47 (6070,33,1486,28)		GO:0002181	cytoplasmic translation	5.09e-18	3.67e-14	3.00 (6070,83,1342,55)		GO:0002181	cytoplasmic translation	2.17e-05	0.156	4.22 (6070,83,208,12)		GO:0046031	ADP metabolic process	0.000632	1	16.72 (6070,11,99,3)		GO:0002181	cytoplasmic translation	2.06e-07
gene2352	gene2352	gene1684	gene4443	gene11218	gene6042	gene9659	gene6561	gene1040	gene3154		gene2352	550804	LOC550804	transketolase isoform X1			GO:1902600	proton transmembrane transport	5.91e-06	0.0213	1.82 (6070,33,2828,28)		GO:0009127	purine nucleoside monophosphate biosynthetic process	6.68e-12	2.41e-08	3.27 (6070,35,1486,28)		GO:0040029	regulation of gene expression, epigenetic	1.96e-05	0.0704	1.90 (6070,88,1342,37)		GO:0055002	striated muscle cell development	0.000366	1	10.61 (6070,11,208,4)		GO:0009185	ribonucleoside diphosphate metabolic process	0.000632	1	16.72 (6070,11,99,3)		GO:0043604	amide biosynthetic process	0.000222
gene2038	gene2038	gene10449	gene1748	gene4177	gene5006	gene5034	gene6460	gene1684	gene6674		gene2038	100576284	LOC100576284	uncharacterized protein LOC100576284			GO:0015672	monovalent inorganic cation transport	1.22e-05	0.0293	1.53 (6070,76,2828,54)		GO:0009168	purine ribonucleoside monophosphate biosynthetic process	6.68e-12	1.6e-08	3.27 (6070,35,1486,28)		GO:0006412	translation	0.000108	0.259	1.55 (6070,178,1342,61)		GO:0055001	muscle cell development	0.000534	1	9.73 (6070,12,208,4)		GO:0009179	purine ribonucleoside diphosphate metabolic process	0.000632	1	16.72 (6070,11,99,3)		GO:0006412	translation	0.000319
gene9153	gene9153	gene11457	gene1023	gene8980	gene4940	gene9798	gene2352	gene11443	gene4997		gene9153	107965262	LOC107965262				GO:0006754	ATP biosynthetic process	1.92e-05	0.0345	1.89 (6070,25,2828,22)		GO:0006754	ATP biosynthetic process	3.32e-11	5.98e-08	3.59 (6070,25,1486,22)		GO:0043043	peptide biosynthetic process	0.000218	0.392	1.52 (6070,182,1342,61)								GO:0009135	purine nucleoside diphosphate metabolic process	0.000632	1	16.72 (6070,11,99,3)		GO:0038060	nitric oxide-cGMP-mediated signaling pathway	0.00032
gene251	gene251	gene4913	gene3563	gene2222	gene5005	gene11910	gene1708	gene5093	gene2833		gene251	414037	LOC414037	protein Wnt-5b isoform X1			GO:0044281	small molecule metabolic process	1.93e-05	0.0277	1.19 (6070,503,2828,279)		GO:0009156	ribonucleoside monophosphate biosynthetic process	1.92e-10	2.76e-07	2.96 (6070,40,1486,29)		GO:0006325	chromatin organization	0.000243	0.35	1.45 (6070,231,1342,74)								GO:1903688	positive regulation of border follicle cell migration	0.000876	1	9.08 (6070,27,99,4)		GO:1903831	signal transduction involved in cellular response to ammonium ion	0.00032
gene5144	gene5144	gene11509	gene9175	gene5957	gene6683	gene7009	gene1022	gene1575	gene12157		gene5144	107964583	LOC107964583				GO:0098655	cation transmembrane transport	2.16e-05	0.0259	1.42 (6070,112,2828,74)		GO:0098660	inorganic ion transmembrane transport	2.27e-10	2.72e-07	2.11 (6070,114,1486,59)		GO:0006334	nucleosome assembly	0.000398	0.477	2.76 (6070,18,1342,11)														GO:0007213	G protein-coupled acetylcholine receptor signaling pathway	0.00032
gene7316	gene7316	gene2222	gene3800	gene9904	gene10649	gene264	gene2108	gene10460	gene4042		gene7316	552401	LOC552401	protein cueball			GO:0098660	inorganic ion transmembrane transport	2.39e-05	0.0245	1.41 (6070,114,2828,75)		GO:0009124	nucleoside monophosphate biosynthetic process	4.3e-10	4.42e-07	2.85 (6070,43,1486,30)		GO:0065004	protein-DNA complex assembly	0.000472	0.486	2.06 (6070,44,1342,20)														GO:0095500	acetylcholine receptor signaling pathway	0.00032
gene1040	gene1040	gene1040	gene2452	gene6063	gene1040	gene283	gene5144	gene4103	gene1250		gene1040	725344	LOC725344	histone H2B			GO:0098662	inorganic cation transmembrane transport	4.34e-05	0.039	1.42 (6070,101,2828,67)		GO:0034220	ion transmembrane transport	5.25e-10	4.72e-07	1.90 (6070,161,1486,75)		GO:0030317	flagellated sperm motility	0.000483	0.435	3.29 (6070,11,1342,8)														GO:0043043	peptide biosynthetic process	0.000387
gene6842	gene6842	gene8677	gene2258	gene251	gene10317	gene438	gene4879	gene4905	gene228		gene6842	408969	LOC408969	aminoacylase-1			GO:0009124	nucleoside monophosphate biosynthetic process	5.15e-05	0.0412	1.65 (6070,43,2828,33)		GO:0015672	monovalent inorganic cation transport	1.8e-09	1.44e-06	2.31 (6070,76,1486,43)		GO:0097722	sperm motility	0.000483	0.387	3.29 (6070,11,1342,8)														GO:0043603	cellular amide metabolic process	0.000638
gene3300	gene3300	gene557	gene8436	gene1069	gene4205	gene7763	gene9153	gene5757	gene1677		gene3300	107964351	LOC107964351	60S ribosomal protein L7			GO:0009127	purine nucleoside monophosphate biosynthetic process	5.15e-05	0.0371	1.72 (6070,35,2828,28)		GO:0044281	small molecule metabolic process	2.05e-09	1.48e-06	1.46 (6070,503,1486,180)		GO:0043967	histone H4 acetylation	0.000576	0.414	2.83 (6070,16,1342,10)														GO:1902373	negative regulation of mRNA catabolic process	0.000947
gene8260	gene8260	gene5304	gene1859	gene2393	gene1039	gene3606	gene1035	gene4739	gene739		gene8260	726668	LOC726668	PDZ and LIM domain protein 3 isoform X3			GO:0009168	purine ribonucleoside monophosphate biosynthetic process	5.15e-05	0.0337	1.72 (6070,35,2828,28)		GO:0009126	purine nucleoside monophosphate metabolic process	2.39e-09	1.56e-06	2.72 (6070,45,1486,30)		GO:0043604	amide biosynthetic process	0.000649	0.425	1.45 (6070,200,1342,64)														GO:0055006	cardiac cell development	0.000947
gene1376	gene1376	gene6964	gene7170	gene9803	gene3932	gene7447	gene10225	gene8672	gene11947		gene1376	100576132	LOC100576132	uncharacterized protein LOC100576132 isoform X1			GO:0009156	ribonucleoside monophosphate biosynthetic process	6.27e-05	0.0376	1.66 (6070,40,2828,31)		GO:0009167	purine ribonucleoside monophosphate metabolic process	2.39e-09	1.43e-06	2.72 (6070,45,1486,30)		GO:1902275	regulation of chromatin organization	0.000759	0.455	1.80 (6070,68,1342,27)														GO:0055013	cardiac muscle cell development	0.000947
gene1203	gene1203	gene1039	gene9513	gene10191	gene8431	gene8858	gene8261	gene1039	gene7415		gene1203	726349	LOC726349	actin-binding LIM protein 2 isoform X6			GO:0009260	ribonucleotide biosynthetic process	6.8e-05	0.0376	1.49 (6070,72,2828,50)		GO:0055085	transmembrane transport	2.85e-09	1.58e-06	1.60 (6070,315,1486,123)		GO:0006476	protein deacetylation	0.000826	0.458	2.91 (6070,14,1342,9)														GO:0070831	basement membrane assembly	0.000947
gene5505	gene5505	gene10317	gene242	gene2167	gene10360	gene7761	gene9154	gene11001	gene2226		gene5505	100576976	LOC100576976	putative leucine-rich repeat-containing protein DDB_G0290503			GO:0046390	ribose phosphate biosynthetic process	7.89e-05	0.0406	1.48 (6070,74,2828,51)		GO:0006164	purine nucleotide biosynthetic process	4.5e-09	2.31e-06	2.33 (6070,70,1486,40)		GO:0016575	histone deacetylation	0.000826	0.425	2.91 (6070,14,1342,9)														GO:0048255	mRNA stabilization	0.000947
gene3728	gene3728	gene6042	gene7238	gene1040	gene8888	gene5144	gene7016	gene5524	gene12250		gene3728	411209	LOC411209	uncharacterized protein LOC411209			GO:1901566	organonitrogen compound biosynthetic process	9.41e-05	0.0452	1.19 (6070,412,2828,229)		GO:0009206	purine ribonucleoside triphosphate biosynthetic process	7.89e-09	3.78e-06	3.10 (6070,29,1486,22)																				GO:0007263	nitric oxide mediated signal transduction	0.000947
gene8286	gene8286	gene5235	gene3994	gene1203	gene1041	gene9498	gene3000	gene5573	gene8853		gene8286	724724	LOC724724	ATP-dependent 6-phosphofructokinase isoform X6			GO:0034220	ion transmembrane transport	0.000158	0.0711	1.31 (6070,161,2828,98)		GO:0009145	purine nucleoside triphosphate biosynthetic process	7.89e-09	3.55e-06	3.10 (6070,29,1486,22)
gene5494	gene5494	gene5763	gene9336	gene7316	gene8948	gene10728	gene11701	gene6561	gene634		gene5494	102656523	LOC102656523				GO:0009201	ribonucleoside triphosphate biosynthetic process	0.000182	0.0772	1.72 (6070,30,2828,24)		GO:0009152	purine ribonucleotide biosynthetic process	8.23e-09	3.49e-06	2.35 (6070,66,1486,38)
gene1035	gene1035	gene10649	gene6478	gene2108	gene3678	gene3309	gene5302	gene10889	gene1585		gene1035	412948	LOC412948	delta-1-pyrroline-5-carboxylate synthase isoform X1			GO:0043436	oxoacid metabolic process	0.000213	0.0853	1.23 (6070,267,2828,153)		GO:0072522	purine-containing compound biosynthetic process	9.97e-09	3.99e-06	2.26 (6070,74,1486,41)
gene1708	gene1708	gene1041	gene506	gene1376	gene4855	gene690	gene4739	gene2387	gene164		gene1708	551596	LOC551596	uncharacterized protein LOC551596			GO:0009142	nucleoside triphosphate biosynthetic process	0.000265	0.1	1.68 (6070,32,2828,25)		GO:0098662	inorganic cation transmembrane transport	1.14e-08	4.33e-06	2.06 (6070,101,1486,51)
gene11758	gene11758	gene9694	gene6720	gene8888	gene4942	gene6223	gene8260	gene11449	gene3179		gene11758	100577320	LOC100577320	uncharacterized protein LOC100577320			GO:0006082	organic acid metabolic process	0.000272	0.0978	1.23 (6070,268,2828,153)		GO:0046034	ATP metabolic process	1.75e-08	6.3e-06	2.88 (6070,34,1486,24)
gene7016	gene7016	gene5573	gene3228	gene10505	gene4558	gene4124	gene3728	gene8266	gene1407		gene7016	409637	LOC409637	60S ribosomal protein L23a			GO:0009152	purine ribonucleotide biosynthetic process	0.000304	0.104	1.46 (6070,66,2828,45)		GO:0009142	nucleoside triphosphate biosynthetic process	2.02e-08	6.93e-06	2.94 (6070,32,1486,23)
gene10501	gene10501	gene11449	gene9311	gene493	gene1001	gene1612	gene3132	gene6574	gene7342		gene10501	412209	LOC412209	probable cytochrome P450 6a17			GO:0019693	ribose phosphate metabolic process	0.000314	0.103	1.35 (6070,111,2828,70)		GO:0009201	ribonucleoside triphosphate biosynthetic process	2.27e-08	7.44e-06	3.00 (6070,30,1486,22)
gene4235	gene4235	gene4940	gene7742	gene3530	gene7663	gene131	gene8459	gene7959	gene11472		gene4235	411892	LOC411892	V-type proton ATPase subunit C isoform X1			GO:0009206	purine ribonucleoside triphosphate biosynthetic process	0.000317	0.0993	1.70 (6070,29,2828,23)		GO:0098655	cation transmembrane transport	3.35e-08	1.05e-05	1.97 (6070,112,1486,54)
gene10505	gene10505	gene9693	gene7290	gene6008	gene4774	gene10710	gene5505	gene1037	gene2062		gene10505	112939925	LOC112939925	cytochrome P450 6a13-like			GO:0009145	purine nucleoside triphosphate biosynthetic process	0.000317	0.0952	1.70 (6070,29,2828,23)		GO:0009161	ribonucleoside monophosphate metabolic process	3.43e-08	1.03e-05	2.48 (6070,51,1486,31)
gene11218	gene11218	gene5006	gene1664	gene623	gene11449	gene3681	gene5515	gene8410	gene1709		gene11218	409485	LOC409485	cytoplasmic aconitate hydratase			GO:0009259	ribonucleotide metabolic process	0.000356	0.103	1.36 (6070,104,2828,66)		GO:0046390	ribose phosphate biosynthetic process	3.85e-08	1.11e-05	2.21 (6070,74,1486,40)
gene10225	gene10225	gene8431	gene11055	gene9878	gene10901	gene6149	gene1040	gene11178	gene227		gene10225	725501	LOC725501	protein N-terminal glutamine amidohydrolase isoform X1			GO:1901293	nucleoside phosphate biosynthetic process	0.000372	0.103	1.38 (6070,95,2828,61)		GO:0009123	nucleoside monophosphate metabolic process	4.88e-08	1.35e-05	2.42 (6070,54,1486,32)
gene6460	gene6460	gene6683	gene11804	gene8328	gene8385	gene4175	gene6842	gene4917	gene9746		gene6460	552358	LOC552358	low-density lipoprotein receptor-related protein 2 isoform X1			GO:0015985	energy coupled proton transport, down electrochemical gradient	0.000382	0.102	1.99 (6070,14,2828,13)		GO:0009260	ribonucleotide biosynthetic process	5.29e-08	1.41e-05	2.21 (6070,72,1486,39)
gene3132	gene3132	gene1037	gene6208	gene8916	gene848	gene10099	gene9798	gene4738	gene6503		gene3132	100576333	LOC100576333	nucleoredoxin			GO:0015986	ATP synthesis coupled proton transport	0.000382	0.0982	1.99 (6070,14,2828,13)		GO:0006163	purine nucleotide metabolic process	5.52e-08	1.42e-05	2.00 (6070,102,1486,50)
gene3004	gene3004	gene4103	gene2237	gene10344	gene9878	gene9224	gene7959	gene6897	gene2313		gene3004	724885	LOC724885	zinc finger protein 395 isoform X1			GO:0006164	purine nucleotide biosynthetic process	0.00039	0.0968	1.44 (6070,70,2828,47)		GO:0006810	transport	6.63e-08	1.65e-05	1.27 (6070,1025,1486,319)
gene1412	gene1412	gene5864	gene2679	gene3932	gene1037	gene6293	gene588	gene1443	gene2263		gene1412	410780	LOC410780	sodium/hydrogen exchanger 9B2 isoform X3			GO:0009165	nucleotide biosynthetic process	0.000523	0.125	1.37 (6070,94,2828,60)		GO:0009150	purine ribonucleotide metabolic process	7.01e-08	1.68e-05	2.02 (6070,97,1486,48)
gene7475	gene7475	gene4855	gene2927	gene8851	gene9129	gene1537	gene2897	gene6823	gene1229		gene7475	725938	LOC725938	histone deacetylase 6 isoform X1			GO:0055085	transmembrane transport	0.000654	0.152	1.19 (6070,315,2828,175)		GO:0009117	nucleotide metabolic process	9.22e-08	2.14e-05	1.83 (6070,141,1486,63)
gene6063	gene6063	gene1001	gene7458	gene9062	gene488	gene8852	gene11910	gene2476	gene4771		gene6063	724568	LOC724568	calpain-C isoform X1			GO:0015988	energy coupled proton transmembrane transport, against electrochemical gradient	0.000861	0.194	1.88 (6070,16,2828,14)		GO:1901293	nucleoside phosphate biosynthetic process	9.68e-08	2.18e-05	2.02 (6070,95,1486,47)
gene8980	gene8980	gene5004	gene8803	gene3004	gene356	gene1827	gene2898	gene4981	gene9078		gene8980	102655407	LOC102655407	ATP-dependent RNA helicase p62-like isoform X1			GO:0019752	carboxylic acid metabolic process	0.000973	0.212	1.21 (6070,256,2828,144)		GO:0006811	ion transport	1.09e-07	2.37e-05	1.59 (6070,260,1486,101)
gene9798	gene9798	gene12234	gene3829	gene7405	gene7832	gene11908	gene10775	gene10733	gene6935		gene9798	551869	LOC551869	vitamin K-dependent gamma-carboxylase									GO:0015985	energy coupled proton transport, down electrochemical gradient	1.18e-07	2.5e-05	3.79 (6070,14,1486,13)
gene6561	gene6561	gene4726	gene3209	gene7475	gene3004	gene6332	gene4235	gene2735	gene4248		gene6561	412825	LOC412825	sushi, von Willebrand factor type A, EGF and pentraxin domain-containing protein 1 isoform X1									GO:0015986	ATP synthesis coupled proton transport	1.18e-07	2.43e-05	3.79 (6070,14,1486,13)
gene7756	gene7756	gene10901	gene1084	gene7554	gene7316	gene3218	gene9509	gene5935	gene4697		gene7756	551604	LOC551604	rh-like protein isoform X1									GO:0051234	establishment of localization	1.19e-07	2.38e-05	1.26 (6070,1060,1486,327)
gene11910	gene11910	gene4739	gene1	gene5589	gene296	gene7632	gene2075	gene10868	gene442		gene11910	409854	LOC409854	nuclease-sensitive element-binding protein 1 isoform X4									GO:0015988	energy coupled proton transmembrane transport, against electrochemical gradient	1.9e-07	3.7e-05	3.57 (6070,16,1486,14)
gene2222	gene2222	gene2168	gene7869	gene8131	gene6280	gene3682	gene8286	gene2002	gene7989		gene2222	100578484	LOC100578484	uncharacterized protein LOC100578484									GO:0019693	ribose phosphate metabolic process	1.96e-07	3.7e-05	1.91 (6070,111,1486,52)
gene7009	gene7009	gene3092	gene710	gene3794	gene2476	gene4517	gene5716	gene1001	gene3027		gene7009	411989	LOC411989	eukaryotic initiation factor 4A-I									GO:0009165	nucleotide biosynthetic process	2.01e-07	3.7e-05	2.00 (6070,94,1486,46)
gene9662	gene9662	gene6735	gene6271	gene1568	gene550	gene8229	gene1126	gene10011	gene7447		gene9662	412399	LOC412399	organic cation transporter protein									GO:0006753	nucleoside phosphate metabolic process	2.37e-07	4.26e-05	1.79 (6070,144,1486,63)
gene8461	gene8461	gene10659	gene9488	gene10230	gene10087	gene5041	gene2396	gene1282	gene4356		gene8461	408270	CytC	cytochrome c									GO:0072521	purine-containing compound metabolic process	2.89e-07	5.08e-05	1.88 (6070,115,1486,53)
gene1761	gene1761	gene1667	gene9821	gene4140	gene2720	gene6203	gene11126	gene10374	gene3975		gene1761	552020	LOC552020	neuromodulin isoform X1									GO:0009259	ribonucleotide metabolic process	3.54e-07	6.07e-05	1.92 (6070,104,1486,49)
gene588	gene588	gene3678	gene2385	gene9662	gene1005	gene6087	gene8493	gene7326	gene3573		gene588	409924	LOC409924	synaptic vesicle glycoprotein 2B isoform X1									GO:0099131	ATP hydrolysis coupled ion transmembrane transport	6.86e-07	0.000115	3.54 (6070,15,1486,13)
gene8459	gene8459	gene2387	gene7757	gene11350	gene7676	gene1255	gene4887	gene3032	gene3438		gene8459	408271	LOC408271	rap1 GTPase-activating protein 1 isoform X1									GO:0099132	ATP hydrolysis coupled cation transmembrane transport	6.86e-07	0.000112	3.54 (6070,15,1486,13)
gene2393	gene2393	gene8934	gene1475	gene1476	gene363	gene7252	gene2738	gene1035	gene7696		gene2393	726478	LOC726478	inhibin beta C chain									GO:0015991	ATP hydrolysis coupled proton transport	6.86e-07	0.00011	3.54 (6070,15,1486,13)
gene5515	gene5515	gene5757	gene9608	gene10630	gene11723	gene950	gene10011	gene1142	gene4416		gene5515	409528	LOC409528	60S ribosomal protein L7a									GO:0090662	ATP hydrolysis coupled transmembrane transport	6.86e-07	0.000107	3.54 (6070,15,1486,13)
gene3000	gene3000	gene6262	gene6014	gene3300	gene505	gene7873	gene2328	gene1331	gene1018		gene3000	551744	LOC551744	phospholipase ABHD3 isoform X1									GO:0019637	organophosphate metabolic process	8.1e-07	0.000124	1.55 (6070,253,1486,96)
gene7625	gene7625	gene9771	gene2705	gene2068	gene4543	gene10344	gene1539	gene1938	gene9028		gene7625	724178	LOC724178	uncharacterized protein LOC724178									GO:0009205	purine ribonucleoside triphosphate metabolic process	1.3e-06	0.000195	2.43 (6070,42,1486,25)
gene6303	gene6303	gene4905	gene7986	gene3636	gene5022	gene237	gene7316	gene9987	gene12015		gene6303	100577539	LOC100577539										GO:0009144	purine nucleoside triphosphate metabolic process	1.3e-06	0.000191	2.43 (6070,42,1486,25)
gene11716	gene11716	gene6093	gene4326	gene409	gene38	gene3003	gene7009	gene11002	gene7952		gene11716	726323	LOC726323	uncharacterized protein LOC726323 isoform X2									GO:0055086	nucleobase-containing small molecule metabolic process	1.78e-06	0.000256	1.65 (6070,176,1486,71)
gene9863	gene9863	gene11443	gene4790	gene3678	gene5935	gene9628	gene1412	gene5816	gene6989		gene9863	413296	LOC413296	40S ribosomal protein S3a									GO:0043436	oxoacid metabolic process	1.86e-06	0.000263	1.51 (6070,267,1486,99)
gene5589	gene5589	gene848	gene10479	gene9987	gene11630	gene10346	gene251	gene7316	gene9508		gene5589	409450	LOC409450	guanine nucleotide-binding protein subunit beta-like protein									GO:0072350	tricarboxylic acid metabolic process	2.14e-06	0.000296	2.89 (6070,24,1486,17)
gene9904	gene9904	gene4706	gene5855	gene6821	gene7664	gene7428	gene3300	gene6890	gene4079		gene9904	551884	LOC551884	tetratricopeptide repeat protein 7B isoform X1									GO:0006082	organic acid metabolic process	2.26e-06	0.000307	1.51 (6070,268,1486,99)
gene10624	gene10624	gene8430	gene4805	gene1001	gene7855	gene6670	gene7695	gene8697	gene983		gene10624	412927	LOC412927	uncharacterized protein LOC412927									GO:0009199	ribonucleoside triphosphate metabolic process	2.39e-06	0.000318	2.37 (6070,43,1486,25)
gene2898	gene2898	gene11505	gene11543	gene9628	gene10459	gene7629	gene8697	gene3571	gene11600		gene2898	409643	LOC409643	failed axon connections isoform X1									GO:0006101	citrate metabolic process	2.47e-06	0.000324	2.97 (6070,22,1486,16)
gene3682	gene3682	gene7326	gene2734	gene3853	gene1412	gene9615	gene1739	gene12057	gene9641		gene3682	408799	LOC408799	40S ribosomal protein S24									GO:0006091	generation of precursor metabolites and energy	2.77e-06	0.000356	1.82 (6070,110,1486,49)
gene4175	gene4175	gene8266	gene9005	gene4735	gene2393	gene4377	gene1761	gene1412	gene1368		gene4175	724868	LOC724868	40S ribosomal protein S11									GO:0006812	cation transport	2.84e-06	0.000359	1.67 (6070,159,1486,65)
gene2229	gene2229	gene7550	gene2936	gene5973	gene2210	gene4663	gene11663	gene1131	gene437		gene2229	102656585	LOC102656585	CD151 antigen isoform X1									GO:0009141	nucleoside triphosphate metabolic process	3.12e-06	0.000387	2.31 (6070,46,1486,26)
gene7405	gene7405	gene11069	gene5702	gene11344	gene4140	gene10304	gene6370	gene10026	gene8761		gene7405	409227	Usp	ultraspiracle isoform X5									GO:0046031	ADP metabolic process	6.47e-06	0.00079	3.71 (6070,11,1486,10)
gene2396	gene2396	gene5005	gene5072	gene3681	gene8266	gene171	gene5715	gene701	gene360		gene2396	551687	LOC551687	uncharacterized protein LOC551687									GO:0009185	ribonucleoside diphosphate metabolic process	6.47e-06	0.000777	3.71 (6070,11,1486,10)
gene4735	gene4735	gene5093	gene10896	gene9201	gene10404	gene3794	gene11888	gene4254	gene2306		gene4735	725552	LOC725552	DNA-directed RNA polymerase III subunit RPC1 isoform X2									GO:0009179	purine ribonucleoside diphosphate metabolic process	6.47e-06	0.000764	3.71 (6070,11,1486,10)
gene6293	gene6293	gene2476	gene2333	gene7584	gene12019	gene8131	gene7847	gene3004	gene11939		gene6293	100576381	LOC100576381	probable basic-leucine zipper transcription factor Q isoform X2									GO:0009135	purine nucleoside diphosphate metabolic process	6.47e-06	0.000751	3.71 (6070,11,1486,10)
gene3354	gene3354	gene2625	gene11301	gene11758	gene2108	gene4986	gene3068	gene4256	gene3152		gene3354	412130	LOC412130	ral GTPase-activating protein subunit beta isoform X8									GO:0006099	tricarboxylic acid cycle	7.45e-06	0.000851	2.92 (6070,21,1486,15)
gene10191	gene10191	gene11637	gene6810	gene848	gene469	gene7418	gene12132	gene6460	gene9593		gene10191	102654964	LOC102654964	uncharacterized protein LOC102654964 isoform X2									GO:0019752	carboxylic acid metabolic process	1.03e-05	0.00116	1.48 (6070,256,1486,93)
gene171	gene171	gene623	gene574	gene9730	gene10332	gene11915	gene11899	gene3892	gene3		gene171	725647	LOC725647	40S ribosomal protein S6									GO:1901137	carbohydrate derivative biosynthetic process	1.2e-05	0.00133	1.64 (6070,149,1486,60)
gene9878	gene9878	gene8224	gene561	gene12070	gene10014	gene2003	gene6216	gene8124	gene3508		gene9878	410167	LOC410167	uncharacterized protein LOC410167									GO:1901575	organic substance catabolic process	1.49e-05	0.00163	1.34 (6070,470,1486,154)
gene1037	gene1037	gene7441	gene6119	gene11716	gene4340	gene1203	gene4131	gene842	gene193		gene1037	725230	LOC725230	histone H4									GO:0051179	localization	1.8e-05	0.00194	1.19 (6070,1230,1486,358)
gene11449	gene11449	gene1443	gene7253	gene1255	gene10318	gene12119	gene10868	gene3090	gene3110		gene11449	726155	LOC726155	uncharacterized protein LOC726155									GO:0006757	ATP generation from ADP	2.42e-05	0.00256	3.68 (6070,10,1486,9)
gene1022	gene1022	gene4942	gene9249	gene10360	gene7405	gene9863	gene5494	gene1526	gene10916		gene1022	724762	LOC724762	ras-related protein Rab-28									GO:0006096	glycolytic process	2.42e-05	0.00253	3.68 (6070,10,1486,9)
gene7042	gene7042	gene998	gene9696	gene4536	gene605	gene11994	gene11654	gene1005	gene8858		gene7042	412299	LOC412299	muscarinic acetylcholine receptor DM1									GO:0042866	pyruvate biosynthetic process	2.42e-05	0.00249	3.68 (6070,10,1486,9)
gene9154	gene9154	gene3645	gene3414	gene1827	gene7584	gene3300	gene4175	gene12018	gene7252		gene9154	102656488	LOC102656488										GO:0090407	organophosphate biosynthetic process	3.36e-05	0.00341	1.58 (6070,163,1486,63)
gene10093	gene10093	gene6574	gene1294	gene8429	gene11218	gene1568	gene10900	gene5478	gene1810		gene10093	100577752	LOC100577752	F-box only protein 43-like isoform X1									GO:0009056	catabolic process	3.98e-05	0.00398	1.30 (6070,521,1486,166)
gene9615	gene9615	gene9878	gene9015	gene6842	gene1367	gene11590	gene8461	gene2108	gene4206		gene9615	724242	LOC724242	protein neuralized isoform X4									GO:0019362	pyridine nucleotide metabolic process	4.03e-05	0.00398	2.66 (6070,23,1486,15)
gene1069	gene1069	gene12361	gene490	gene3354	gene2325	gene7640	gene3682	gene5552	gene1352		gene1069	551529	LOC551529	fibroblast growth factor 1									GO:0046496	nicotinamide nucleotide metabolic process	4.03e-05	0.00392	2.66 (6070,23,1486,15)
gene10344	gene10344	gene9018	gene8209	gene2352	gene8429	gene9662	gene12062	gene8699	gene9615		gene10344	410451	LOC410451	venom serine carboxypeptidase isoform X1									GO:0030163	protein catabolic process	4.1e-05	0.00393	1.60 (6070,151,1486,59)
gene7404	gene7404	gene8948	gene9524	gene38	gene8933	gene2611	gene4144	gene2396	gene11265		gene7404	411832	LOC411832	translationally-controlled tumor protein homolog									GO:0098657	import into cell	4.38e-05	0.00415	1.65 (6070,129,1486,52)
gene4739	gene4739	gene6387	gene11897	gene10649	gene9987	gene4933	gene7446	gene2210	gene8325		gene4739	725404	LOC725404	actin, muscle									GO:0046434	organophosphate catabolic process	4.72e-05	0.00442	2.48 (6070,28,1486,17)
gene1001	gene1001	gene10360	gene10007	gene8600	gene2877	gene4180	gene9521	gene3204	gene1551		gene1001	406132	LOC406132	histone H4									GO:0006508	proteolysis	5.99e-05	0.00553	1.37 (6070,353,1486,118)
gene6008	gene6008	gene4774	gene1380	gene5494	gene4177	gene742	gene3202	gene9601	gene426		gene6008	408928	Hsp90	heat shock protein 90									GO:0072524	pyridine-containing compound metabolic process	6.29e-05	0.00573	2.51 (6070,26,1486,16)
gene9521	gene9521	gene1104	gene8577	gene1039	gene3728	gene4714	gene5757	gene1539	gene4127		gene9521	551624	LOC551624	TOX high mobility group box family member 3 isoform X1									GO:0006511	ubiquitin-dependent protein catabolic process	6.36e-05	0.00573	1.51 (6070,189,1486,70)
gene1367	gene1367	gene9704	gene11579	gene7247	gene4735	gene3473	gene12210	gene9878	gene225		gene1367	406071	Gat-a	GABA neurotransmitter transporter-1A									GO:0051603	proteolysis involved in cellular protein catabolic process	6.39e-05	0.00568	1.49 (6070,209,1486,76)
gene6370	gene6370	gene7316	gene6673	gene9652	gene4892	gene1325	gene1526	gene5716	gene12062		gene6370	727030	LOC727030	myotubularin-related protein 6 isoform X2									GO:0017144	drug metabolic process	7.14e-05	0.00627	1.56 (6070,160,1486,61)
gene8261	gene8261	gene10460	gene7666	gene277	gene6279	gene8259	gene1894	gene4189	gene3003		gene8261	408286	LOC408286	2-oxoglutarate dehydrogenase, mitochondrial isoform X5									GO:0006733	oxidoreduction coenzyme metabolic process	8.37e-05	0.00726	2.28 (6070,34,1486,19)
gene1739	gene1739	gene7959	gene4435	gene1031	gene1070	gene7628	gene5935	gene1103	gene9502		gene1739	724449	LOC724449	protein lethal(2)essential for life									GO:0051186	cofactor metabolic process	9.3e-05	0.00797	1.58 (6070,145,1486,56)
gene11701	gene11701	gene3004	gene10406	gene4892	gene2524	gene9812	gene5792	gene3642	gene131		gene11701	409502	LOC409502	uncharacterized protein LOC409502									GO:0019941	modification-dependent protein catabolic process	0.000113	0.00953	1.49 (6070,192,1486,70)
gene5957	gene5957	gene965	gene753	gene9615	gene8413	gene409	gene2394	gene4203	gene5597		gene5957	408937	LOC408937	SPARC									GO:0051188	cofactor biosynthetic process	0.000113	0.0095	1.80 (6070,77,1486,34)
gene5935	gene5935	gene816	gene7786	gene7234	gene277	gene10506	gene7625	gene6836	gene10984		gene5935	724612	LOC724612	thyrotropin-releasing hormone-degrading ectoenzyme isoform X2									GO:0010498	proteasomal protein catabolic process	0.000135	0.0112	1.58 (6070,137,1486,53)
gene10868	gene10868	gene488	gene8991	gene11915	gene8600	gene5633	gene11858	gene5022	gene1203		gene10868	408456	LOC408456	facilitated trehalose transporter Tret1-2 homolog									GO:0022904	respiratory electron transport chain	0.000136	0.0111	1.93 (6070,57,1486,27)
gene11293	gene11293	gene5935	gene11702	gene4124	gene7616	gene9631	gene426	gene3728	gene8515		gene11293	552479	LOC552479	protein draper isoform X4									GO:0022900	electron transport chain	0.000142	0.0115	1.91 (6070,60,1486,28)
gene131	gene131	gene12144	gene6102	gene6366	gene6636	gene12007	gene7701	gene3202	gene11747		gene131	409479	LOC409479	60S ribosomal protein L6									GO:0044248	cellular catabolic process	0.000187	0.015	1.29 (6070,473,1486,149)
gene12132	gene12132	gene6897	gene2129	gene4774	gene8851	gene10521	gene6002	gene3736	gene8962		gene12132	413120	LOC413120	dnaJ homolog subfamily B member 12									GO:0098656	anion transmembrane transport	0.000188	0.0148	1.93 (6070,55,1486,26)
gene8131	gene8131	gene6561	gene1068	gene7855	gene4496	gene3812	gene11758	gene12181	gene7486		gene8131	551666	LOC551666	double-stranded RNA-binding protein Staufen homolog 2 isoform X4									GO:0043632	modification-dependent macromolecule catabolic process	0.000194	0.0152	1.47 (6070,195,1486,70)
gene4887	gene4887	gene8640	gene7341	gene3136	gene2352	gene5589	gene10093	gene11663	gene2603		gene4887	494511	Gat-1B	GABA neurotransmitter transporter-1B isoform X1									GO:0006836	neurotransmitter transport	0.000209	0.0162	1.83 (6070,67,1486,30)
gene10332	gene10332	gene6770	gene3525	gene6680	gene9114	gene7625	gene4189	gene11460	gene7680		gene10332	410448	LOC410448	carcinine transporter isoform X1									GO:0019363	pyridine nucleotide biosynthetic process	0.000229	0.0175	2.81 (6070,16,1486,11)
gene5973	gene5973	gene3087	gene8569	gene3309	gene9201	gene79	gene6385	gene4497	gene1256		gene5973	725515	LOC725515	zinc finger protein 543 isoform X1									GO:0019359	nicotinamide nucleotide biosynthetic process	0.000229	0.0173	2.81 (6070,16,1486,11)
gene7629	gene7629	gene10962	gene12135	gene4663	gene4773	gene8496	gene6710	gene3556	gene7009		gene7629	102655188	LOC102655188	zinc finger protein 2 homolog									GO:0009166	nucleotide catabolic process	0.000229	0.0172	2.81 (6070,16,1486,11)
gene7428	gene7428	gene10251	gene7377	gene11590	gene6489	gene11255	gene895	gene2352	gene7873		gene7428	406126	Rps8	40S ribosomal protein S8 isoform X1									GO:1901564	organonitrogen compound metabolic process	0.000277	0.0206	1.13 (6070,1586,1486,440)
gene4377	gene4377	gene9129	gene7188	gene7663	gene9287	gene6638	gene1103	gene10332	gene3575		gene4377	724369	LOC724369	40S ribosomal protein S25									GO:0006897	endocytosis	0.000361	0.0265	1.62 (6070,106,1486,42)
gene10230	gene10230	gene10147	gene2677	gene10401	gene2111	gene1381	gene10624	gene390	gene11105		gene10230	410422	LOC410422	dihydrofolate reductase isoform X1									GO:0006793	phosphorus metabolic process	0.000382	0.0278	1.25 (6070,542,1486,166)
gene10951	gene10951	gene4738	gene1359	gene10521	gene2229	gene10624	gene9835	gene1669	gene11309		gene10951	412941	LOC412941	synaptic vesicle glycoprotein 2B									GO:0072525	pyridine-containing compound biosynthetic process	0.000384	0.0277	2.58 (6070,19,1486,12)
gene1039	gene1039	gene7566	gene11682	gene2711	gene11344	gene8748	gene3042	gene387	gene9871		gene1039	725308	LOC725308	histone H2A									GO:0006820	anion transport	0.000456	0.0325	1.60 (6070,107,1486,42)
gene4892	gene4892	gene3032	gene2615	gene11723	gene8461	gene10979	gene11129	gene754	gene7093		gene4892	725799	LOC725799	uncharacterized protein LOC725799 isoform X1									GO:0006790	sulfur compound metabolic process	0.000456	0.0322	1.67 (6070,88,1486,36)
gene11994	gene11994	gene7617	gene10858	gene9863	gene1464	gene887	gene1376	gene10450	gene6293		gene11994	100577769	LOC100577769	uncharacterized protein LOC100577769									GO:0099003	vesicle-mediated transport in synapse	0.000537	0.0375	1.79 (6070,64,1486,28)
gene2476	gene2476	gene5641	gene8684	gene3218	gene6842	gene11716	gene6836	gene8933	gene5416		gene2476	724227	LOC724227	synaptic vesicle glycoprotein 2B									GO:0006732	coenzyme metabolic process	0.000567	0.0392	1.64 (6070,92,1486,37)
gene8493	gene8493	gene1205	gene6896	gene4743	gene2215	gene328	gene4761	gene2877	gene12115		gene8493	727078	LOC727078	phospholipid phosphatase 1 isoform X1									GO:0006796	phosphate-containing compound metabolic process	0.000568	0.039	1.24 (6070,535,1486,163)
gene7584	gene7584	gene6441	gene37	gene1464	gene3348	gene1219	gene2229	gene5715	gene8197		gene7584	107964994	LOC107964994	uncharacterized protein LOC107964994									GO:1901565	organonitrogen compound catabolic process	0.000574	0.0389	1.38 (6070,236,1486,80)
gene3042	gene3042	gene9774	gene5250	gene9825	gene8845	gene10093	gene8218	gene6412	gene11588		gene3042	726043	LOC726043	leucine-rich repeat-containing protein 57									GO:0043161	proteasome-mediated ubiquitin-dependent protein catabolic process	0.000599	0.0403	1.53 (6070,131,1486,49)
gene9509	gene9509	gene10877	gene11192	gene8431	gene6766	gene7042	gene1426	gene320	gene5650		gene9509	726294	LOC726294	orcokinin peptides precursor									GO:0006909	phagocytosis	0.000654	0.0436	2.72 (6070,15,1486,10)
gene8043	gene8043	gene10868	gene6097	gene445	gene9904	gene3471	gene2476	gene1081	gene895		gene8043	550998	LOC550998	carbohydrate sulfotransferase 11									GO:0046939	nucleotide phosphorylation	0.000654	0.0432	2.72 (6070,15,1486,10)
gene8933	gene8933	gene11178	gene2622	gene4750	gene9825	gene11358	gene5971	gene6593	gene9199		gene8933	413816	LOC413816	sodium-independent sulfate anion transporter isoform X1									GO:0048583	regulation of response to stimulus	0.00071	0.0465	1.20 (6070,728,1486,214)
gene11309	gene11309	gene617	gene12150	gene10506	gene3992	gene3658	gene9078	gene1555	gene3769		gene11309	100577909	LOC100577909	high mobility group protein I									GO:0016999	antibiotic metabolic process	0.000711	0.0461	2.10 (6070,33,1486,17)
gene784	gene784	gene4558	gene3138	gene6670	gene8980	gene7045	gene11313	gene2394	gene7910		gene784	409646	LOC409646	cationic amino acid transporter 3 isoform X3									GO:0015698	inorganic anion transport	0.000711	0.0457	2.10 (6070,33,1486,17)
gene3003	gene3003	gene1005	gene9027	gene11010	gene7167	gene11822	gene12244	gene4879	gene4144		gene3003	100577574	LOC100577574	leucine-rich repeat-containing protein 4C isoform X2									GO:1901184	regulation of ERBB signaling pathway	0.000711	0.0453	2.10 (6070,33,1486,17)
gene409	gene409	gene7595	gene507	gene6638	gene1476	gene430	gene3004	gene4896	gene697		gene409	503505	LOC503505	icarapin-like precursor									GO:0042058	regulation of epidermal growth factor receptor signaling pathway	0.000711	0.0449	2.10 (6070,33,1486,17)
gene10011	gene10011	gene1412	gene1167	gene5445	gene11130	gene1069	gene4076	gene10900	gene6953		gene10011	408394	LOC408394	collagen alpha-1(I) chain									GO:0010646	regulation of cell communication	0.000949	0.0594	1.21 (6070,660,1486,195)
gene8124	gene8124	gene4389	gene6229	gene9153	gene1031	gene11389	gene3944	gene4131	gene7398		gene8124	100578824	LOC100578824	zinc finger protein ZIC 4									GO:0023051	regulation of signaling	0.000949	0.0589	1.21 (6070,660,1486,195)
gene7959	gene7959	gene1575	gene8692	gene10987	gene766	gene6821	gene11017	gene8383	gene3042		gene7959	413749	LOC413749	serine protease inhibitor 88Ea isoform X1									GO:1901185	negative regulation of ERBB signaling pathway	0.000984	0.0605	2.31 (6070,23,1486,13)
gene3348	gene3348	gene2402	gene8262	gene784	gene3136	gene4584	gene571	gene11294	gene11888		gene3348	100578006	LOC100578006	inorganic pyrophosphatase									GO:0042059	negative regulation of epidermal growth factor receptor signaling pathway	0.000984	0.06	2.31 (6070,23,1486,13)
gene2897	gene2897	gene9775	gene12049	gene3273	gene8152	gene11164	gene2021	gene3000	gene492		gene2897	409642	LOC409642	uncharacterized protein LOC409642									GO:0009108	coenzyme biosynthetic process	0.000989	0.0598	1.75 (6070,63,1486,27)
gene12062	gene12062	gene8406	gene2791	gene6489	gene4439	gene9654	gene7908	gene1367	gene11343		gene12062	551771	LOC551771	methionine aminopeptidase 2
gene8858	gene8858	gene7560	gene11326	gene4439	gene961	gene11758	gene6412	gene4887	gene1202		gene8858	551114	LOC551114	methyltransferase-like protein 9
gene5022	gene5022	gene479	gene10939	gene9129	gene9652	gene11744	gene1551	gene9983	gene2021		gene5022	102656014	LOC102656014
gene1426	gene1426	gene5143	gene11401	gene79	gene9945	gene7404	gene2428	gene4504	gene10791		gene1426	726056	LOC726056	60S ribosomal protein L21
gene952	gene952	gene5358	gene5216	gene4940	gene1761	gene1854	gene11457	gene2738	gene9662		gene952	726172	LOC726172	death-associated inhibitor of apoptosis 2
gene8916	gene8916	gene3932	gene5718	gene1412	gene1425	gene7241	gene1061	gene5744	gene7623		gene8916	100578343	LOC100578343
gene4536	gene4536	gene10937	gene1313	gene363	gene4847	gene7344	gene4497	gene3527	gene11657		gene4536	413001	LOC413001	extended synaptotagmin-1 isoform X1
gene3202	gene3202	gene11621	gene8775	gene1037	gene4536	gene8328	gene6293	gene6216	gene9453		gene3202	410905	LOC410905	sodium/potassium-transporting ATPase subunit beta-2
gene10775	gene10775	gene11002	gene10888	gene10979	gene2516	gene6680	gene4965	gene699	gene2251		gene10775	409299	LOC409299	adenylosuccinate synthetase
gene8600	gene8600	gene4145	gene7564	gene3473	gene11293	gene7234	gene1686	gene7014	gene1426		gene8600	100578524	LOC100578524	uncharacterized protein LOC100578524 isoform X1
gene10957	gene10957	gene1156	gene6961	gene5022	gene4230	gene8916	gene3	gene5621	gene237		gene10957	552632	LOC552632	60S ribosomal protein L22
gene2877	gene2877	gene1204	gene8171	gene5771	gene170	gene5973	gene7486	gene5302	gene1126		gene2877	100578314	LOC100578314	monocarboxylate transporter 10
gene848	gene848	gene10011	gene7806	gene8266	gene11213	gene1376	gene5744	gene6385	gene5457		gene848	102656611	LOC102656611	glycine-rich cell wall structural protein-like
gene8383	gene8383	gene10341	gene44	gene1367	gene2711	gene1288	gene1203	gene8493	gene5589		gene8383	551793	LOC551793	uncharacterized protein LOC551793 isoform X1
gene7873	gene7873	gene4170	gene5897	gene11630	gene3183	gene8260	gene8977	gene6261	gene9798		gene7873	409847	LOC409847	15-hydroxyprostaglandin dehydrogenase
gene4124	gene4124	gene12353	gene777	gene1749	gene10951	gene4750	gene8124	gene11701	gene11910		gene4124	409206	LOC409206	tripartite motif-containing protein 2 isoform X5
gene11126	gene11126	gene1035	gene4424	gene8229	gene11417	gene6564	gene9863	gene9880	gene10025		gene11126	552378	43165
gene10302	gene10302	gene5022	gene8758	gene5144	gene6698	gene1725	gene9094	gene2839	gene210		gene10302	724899	LOC724899	lysozyme
gene6680	gene6680	gene6061	gene9464	gene4986	gene11288	gene875	gene4103	gene2395	gene9071		gene6680	727408	LOC727408	slit homolog 1 protein isoform X1
gene11858	gene11858	gene7726	gene164	gene11449	gene8286	gene8187	gene2532	gene8461	gene10190		gene11858	724917	LOC724917	inactive serine protease scarface
gene8218	gene8218	gene11286	gene5885	gene8043	gene11366	gene7554	gene11002	gene10935	gene7016		gene8218	409552	LOC409552	40S ribosomal protein S10
gene4177	gene4177	gene10733	gene3438	gene4942	gene10239	gene9062	gene4129	gene11040	gene4377		gene4177	411069	LOC411069	bifunctional arginine demethylase and lysyl-hydroxylase PSR
gene9094	gene9094	gene10663	gene11982	gene6332	gene4478	gene1710	gene4504	gene6842	gene9938		gene9094	551323	LOC551323	uncharacterized protein LOC551323 isoform X1
gene3678	gene3678	gene9987	gene9462	gene3003	gene3853	gene2114	gene1037	gene9172	gene6063		gene3678	411021	LOC411021	UDP-glucuronosyltransferase 2B18 isoform X1
gene8259	gene8259	gene4938	gene7984	gene1288	gene7475	gene6175	gene1523	gene4579	gene5422		gene8259	408288	LOC408288	isovaleryl-CoA dehydrogenase, mitochondrial
gene8977	gene8977	gene7592	gene8354	gene6564	gene8285	gene6063	gene11309	gene2229	gene4336		gene8977	409518	LOC409518	uncharacterized protein LOC409518
gene2391	gene2391	gene7419	gene7083	gene3728	gene249	gene389	gene9306	gene11336	gene171		gene2391	408654	PDHB	pyruvate dehydrogenase E1 component subunit beta, mitochondrial
gene11915	gene11915	gene8124	gene5382	gene7418	gene8256	gene8043	gene2	gene5940	gene2211		gene11915	412470	LOC412470	MAP kinase-interacting serine/threonine-protein kinase 1 isoform X2
gene9167	gene9167	gene10613	gene6818	gene11366	gene7049	gene5505	gene4917	gene5608	gene740		gene9167	100576646	LOC100576646	dihydrolipoyllysine-residue acetyltransferase component of pyruvate dehydrogenase complex, mitochondrial
gene5400	gene5400	gene2002	gene12014	gene8461	gene8549	gene11887	gene10957	gene2897	gene12193		gene5400	551631	LOC551631	dihydrolipoyllysine-residue acetyltransferase component of pyruvate dehydrogenase complex, mitochondrial
gene2111	gene2111	gene1938	gene10328	gene5829	gene5400	gene10630	gene3027	gene5694	gene7629		gene2111	551395	LOC551395	acetyl-CoA acetyltransferase, cytosolic
gene11183	gene11183	gene2210	gene4297	gene7763	gene3354	gene5494	gene9167	gene1209	gene9863		gene11183	551005	LOC551005	hexokinase type 2 isoform X2
gene2068	gene2068	gene8410	gene6174	gene1684	gene11010	gene7690	gene6823	gene9016	gene8033		gene2068	100578801	LOC100578801	uncharacterized protein LOC100578801
gene237	gene237	gene2108	gene4604	gene1219	gene4422	gene784	gene9638	gene7405	gene11272		gene237	409290	LOC409290	60S ribosomal protein L14 isoform X1
gene5971	gene5971	gene1166	gene5320	gene2720	gene6366	gene9951	gene11293	gene7847	gene10706		gene5971	411750	LOC411750	probable E3 ubiquitin-protein ligase HERC4 isoform X1
gene2398	gene2398	gene4256	gene3631	gene7664	gene5081	gene10401	gene10733	gene10840	gene6857		gene2398	410803	LOC410803	solute carrier family 41 member 1 isoform X1
gene891	gene891	gene1131	gene6167	gene171	gene7207	gene434	gene5594	gene3348	gene3161		gene891	411976	LOC411976	sodium/potassium/calcium exchanger 4 isoform X1
gene10754	gene10754	gene7817	gene5894	gene8154	gene2599	gene4743	gene4256	gene2440	gene8218		gene10754	725621	LOC725621	uncharacterized protein LOC725621
gene7447	gene7447	gene12018	gene7671	gene8286	gene8714	gene7996	gene1443	gene1587	gene5144		gene7447	406152	LOC406152	juvenile hormone epoxide hydrolase 1
gene1804	gene1804	gene5524	gene1547	gene9812	gene9741	gene10505	gene8933	gene8261	gene4175		gene1804	725164	LOC725164	uncharacterized protein LOC725164 isoform X1
gene8229	gene8229	gene10393	gene10358	gene8845	gene445	gene2167	gene7428	gene7142	gene7987		gene8229	550651	LOC550651	40S ribosomal protein S4
gene4771	gene4771	gene8888	gene3211	gene7625	gene5106	gene251	gene171	gene7446	gene7428		gene4771	411738	LOC411738	lutropin-choriogonadotropic hormone receptor isoform X1
gene7987	gene7987	gene8385	gene10194	gene10014	gene4235	gene9153	gene11294	gene1849	gene2149		gene7987	726270	LOC726270	40S ribosomal protein S19
gene2210	gene2210	gene4205	gene2124	gene887	gene8154	gene5184	gene4203	gene5077	gene3682		gene2210	410820	LOC410820	proton channel OtopLc isoform X1
gene4256	gene4256	gene11720	gene10288	gene6223	gene5824	gene10230	gene5121	gene4735	gene5973		gene4256	107964422	LOC107964422
gene11002	gene11002	gene12367	gene442	gene9951	gene3303	gene1804	gene7042	gene9848	gene577		gene11002	410539	LOC410539	protein 5NUC
gene1684	gene1684	gene9265	gene4591	gene12019	gene9227	gene1749	gene4599	gene9325	gene8510		gene1684	724275	LOC724275	uncharacterized protein LOC724275 isoform X1
gene2167	gene2167	gene6823	gene10119	gene10624	gene11481	gene7247	gene11265	gene4463	gene5515		gene2167	551290	LOC551290	cathepsin O
gene11313	gene11313	gene11339	gene2824	gene7042	gene9460	gene3571	gene3302	gene1761	gene3300		gene11313	413517	LOC413517	phosphate carrier protein, mitochondrial
gene76	gene76	gene12145	gene4704	gene4714	gene952	gene5771	gene6890	gene8813	gene5272		gene76	113219394	LOC113219394	uncharacterized protein LOC113219394 isoform X5
gene9938	gene9938	gene11498	gene250	gene2229	gene731	gene1723	gene7475	gene1523	gene11994		gene9938	551870	LOC551870	60S ribosomal protein L36
gene5716	gene5716	gene356	gene2332	gene10710		gene493	gene11281	gene2822	gene5182		gene5716	409277	LOC409277	acidic phospholipase A2 PA4 isoform X4
gene11588	gene11588	gene10350	gene667	gene3571		gene6740	gene3352	gene8062	gene5517		gene11588	408526	LOC408526	60S ribosomal protein L4
gene328	gene328	gene3090	gene1501	gene550		gene2068	gene10114	gene4360	gene9521		gene328	409418	Hsc70-4	heat shock protein cognate 4
gene6376	gene6376	gene8384	gene6154	gene6293		gene11493	gene2735	gene10264	gene1061		gene6376	725633	LOC725633	probable DNA-directed RNA polymerases I and III subunit RPAC2
gene1669	gene1669	gene7664	gene11519	gene11130		gene6288	gene2815	gene588	gene11000		gene1669	411729	LOC411729	sodium- and chloride-dependent GABA transporter ine isoform X1
gene1894	gene1894	gene854	gene5107	gene4558		gene3636	gene1669	gene7978	gene4624		gene1894	413350	LOC413350	lachesin isoform X3
gene11747	gene11747	gene4543	gene1630	gene170		gene5163	gene7404	gene3353	gene1228		gene11747	408515	LOC408515	60S ribosomal protein L26
gene11472	gene11472	gene2058	gene2153	gene10087		gene10399	gene5190	gene11313	gene10957		gene11472	411570	LOC411570	TPPP family protein CG45057
gene1126	gene1126	gene6890	gene11285	gene389		gene12024	gene10450	gene6757	gene10754		gene1126	408578	LOC408578	armadillo repeat-containing protein 6 homolog
gene12019	gene12019	gene8627	gene11263	gene10302		gene5957	gene10951	gene10661	gene86		gene12019	725117	LOC725117	protein sprouty isoform X1
gene7664	gene7664	gene4684	gene3962	gene6683		gene6303	gene5303	gene1787	gene491		gene7664	411303	nAChRa9	nicotinic acetylcholine receptor alpha9 subunit precursor
gene8181	gene8181	gene10404	gene6468	gene8385		gene10400	gene9880	gene6590	gene11716		gene8181	724321	LOC724321	fumarate hydratase, mitochondrial isoform X1
gene210	gene210	gene505	gene91	gene8260		gene8794	gene577	gene7291	gene7908		gene210	724233	LOC724233	40S ribosomal protein S17
gene9686	gene9686	gene7044	gene4643	gene5006		gene10987	gene8990	gene11382	gene328		gene9686	724912	LOC724912	anoctamin-1-like isoform X4
gene8187	gene8187	gene10880	gene11850	gene7404		gene6008	gene2336	gene2938	gene6378		gene8187	409361	LOC409361	dopamine N-acetyltransferase
gene10710	gene10710	gene10112	gene10382	gene356		gene10501	gene842	gene4892	gene11654		gene10710	550857	LOC550857	protein enhancer of sevenless 2B
gene2326	gene2326	gene7320	gene9839	gene1070		gene9772	gene8383	gene6376	gene4599		gene2326	551688	LOC551688	band 7 protein AGAP004871 isoform X1
gene10649	gene10649	gene7286	gene4444	gene4584		gene1186	gene6376	gene2994	gene2898		gene10649	408443	LOC408443	uncharacterized protein LOC408443
gene7180	gene7180	gene7609	gene3261	gene4230		gene4845	gene4079	gene11183	gene8259		gene7180	551576	LOC551576	exocyst complex component 7
gene7398	gene7398	gene10332	gene10808	gene6042		gene10302	gene9848	gene8286	gene1708		gene7398	409599	LOC409599	60S ribosomal protein L35a
gene5517	gene5517	gene10227	gene2510	gene9114		gene9348	gene7629	gene3708	gene10475		gene5517	551098	LOC551098	uncharacterized protein LOC551098
gene9983	gene9983	gene5602	gene10289	gene2114		gene3273	gene5940	gene4560	gene11770		gene9983	406112	Per	period circadian protein isoform X5
gene1443	gene1443	gene5198	gene4056	gene11493		gene5445	gene11716	gene2319	gene2		gene1443	725103	CSP6	chemosensory protein 6 precursor
gene961	gene961	gene1541	gene1683	gene9631		gene12070	gene7398	gene5842	gene8990		gene961	413228	LOC413228	5-aminolevulinate synthase, erythroid-specific, mitochondrial
gene11265	gene11265	gene2040	gene9028	gene10099		gene7756	gene10783	gene2924	gene9094		gene11265	724186	LOC724186	60S ribosomal protein L19
gene7855	gene7855	gene5816	gene6830	gene1325		gene11350	gene11178	gene2391	gene1376		gene7855	107965072	LOC107965072	uncharacterized protein LOC107965072 isoform X2
gene1749	gene1749	gene10267	gene1170	gene434		gene10191	gene9938	gene580	gene4965		gene1749	100578420	LOC100578420	uncharacterized protein LOC100578420 isoform X1
gene9880	gene9880	gene5680	gene992	gene10332		gene3530	gene2877	gene10775	gene2804		gene9880	410166	LOC410166	myelin regulatory factor-like protein isoform X5
gene7252	gene7252	gene2396	gene3485	gene6087		gene9730	gene9662	gene8977	gene1916		gene7252	724936	LOC724936	uncharacterized protein LOC724936
gene7522	gene7522	gene8699	gene9402	gene9287		gene5829	gene10332	gene11841	gene5221		gene7522	102656409	LOC102656409
gene10706	gene10706	gene3728	gene5453	gene6288		gene9803	gene173	gene5865	gene5693		gene10706	410486	LOC410486	40S ribosomal protein SA
gene7763	gene7763	gene9554	gene11182	gene4340			gene11947	gene2111	gene4129		gene7763	409365	LOC409365	lysosomal alpha-glucosidase
gene1005	gene1005	gene341	gene1018	gene9348			gene5203	gene2507	gene2327		gene1005	726542	LOC726542	histone H3
gene2395	gene2395	gene10678	gene4068	gene131			gene8181	gene10724	gene9950		gene2395	410802	LOC410802	microphthalmia-associated transcription factor isoform X2
gene2394	gene2394	gene1656	gene6868	gene4845			gene2133	gene8069	gene8955		gene2394	410801	LOC410801	cathepsin L1
gene2149	gene2149	gene10032	gene6749	gene11255			gene11628	gene11297	gene3944		gene2149	100577606	LOC100577606	uncharacterized protein LOC100577606
gene6638	gene6638	gene8672	gene4489	gene2111			gene10706	gene8459	gene614		gene6638	413103	LOC413103	cysteine and histidine-rich protein 1 homolog
gene11457	gene11457	gene7855	gene9449	gene2599			gene210	gene11293	gene1053		gene11457	410626	LOC410626	sodium-coupled monocarboxylate transporter 1
gene6216	gene6216	gene5941	gene747	gene9741			gene3348	gene5461	gene10505		gene6216	551804	LOC551804	DNA-binding protein D-ETS-3 isoform X1
gene6501	gene6501	gene550	gene7345	gene4205			gene2326	gene2763	gene2075		gene6501	100578698	LOC100578698	uncharacterized protein LOC100578698
gene887	gene887	gene8933	gene694	gene10728			gene891	gene3068	gene10641		gene887	100577905	LOC100577905	probable serine/threonine-protein kinase DDB_G0282963
gene9652	gene9652	gene607	gene9322	gene11744			gene11994	gene3352	gene9638		gene9652	551103	LOC551103	probable pyruvate dehydrogenase E1 component subunit alpha, mitochondrial isoform X1
gene11213	gene11213	gene1736	gene4783	gene4422			gene131	gene5699	gene7042		gene11213	552736	LOC552736	phosphoglycerate mutase 2
gene12018	gene12018	gene355	gene9078	gene5505			gene1849	gene10951	gene8187		gene12018	113219300	LOC113219300
gene1612	gene1612	gene4542	gene4797	gene5814			gene2002	gene5559	gene10992		gene1612	727358	LOC727358	beta-1,4-glucuronyltransferase 1
gene9950	gene9950	gene10889	gene439	gene5005			gene8858	gene9347	gene7625		gene9950	107965314	LOC107965314
gene10450	gene10450	gene8832	gene211	gene12024			gene2440	gene11017	gene11758		gene10450	100578423	LOC100578423	uncharacterized protein LOC100578423 isoform X5
gene7701	gene7701	gene641	gene2137	gene4377			gene9950	gene11367	gene10391		gene7701	409409	LOC409409	serine/threonine-protein kinase dyf-5 isoform X2
gene5302	gene5302	gene7676	gene8377	gene1425			gene10641	gene5190	gene1395		gene5302	406076	Vha16	vacuolar H+ ATP synthase 16 kDa proteolipid subunit
gene2599	gene2599	gene2877	gene4208	gene5400			gene4336	gene10299	gene9794		gene2599	107964202	LOC107964202
gene3352	gene3352	gene12019	gene11934	gene9498			gene4377	gene9686	gene784		gene3352	727027	LOC727027	cleft lip and palate transmembrane protein 1 homolog
gene8027	gene8027	gene6272	gene6103	gene9224			gene6953	gene4761	gene2815		gene8027	100578455	LOC100578455
gene5715	gene5715	gene5360	gene5076	gene3812			gene8027	gene4235	gene10624		gene5715	413152	LOC413152	LIM domain kinase 1 isoform X2
gene4584	gene4584	gene8944	gene10240	gene8794			gene11747	gene11893	gene9463		gene4584	408853	LOC408853	X-box-binding protein 1 isoform X1
gene3605	gene3605	gene257	gene1812	gene11213			gene2391	gene11971	gene8367		gene3605	102656261	LOC102656261
gene11493	gene11493	gene7596	gene10665	gene10318			gene10840	gene5323	gene6250		gene11493	410620	LOC410620	heat shock protein Hsp70Ab-like
gene11080	gene11080	gene8723	gene4396	gene1761			gene2149	gene10114	gene2336		gene11080	552724	LOC552724	zinc finger CCCH domain-containing protein 13
gene3	gene3	gene3861	gene11712	gene690			gene9870	gene1686	gene7404		gene3	409940	Rfwd3	E3 ubiquitin-protein ligase RFWD3
gene740	gene740	gene11460	gene5720	gene1804			gene3769	gene11151	gene3808		gene740	551107	LOC551107	60S ribosomal protein L9
gene9201	gene9201	gene3957	gene6745	gene6766			gene11183	gene5594	gene8043		gene9201	552511	LOC552511	GTP:AMP phosphotransferase AK3, mitochondrial
gene11770	gene11770	gene6828	gene8848	gene249			gene11382	gene306	gene5188		gene11770	100577551	LOC100577551	eukaryotic translation initiation factor 5B isoform X2
gene7291	gene7291	gene10737	gene8279	gene430			gene2327	gene6098	gene2326		gene7291	412467	LOC412467	bifunctional purine biosynthesis protein PURH
gene9803	gene9803	gene6696	gene10196	gene7873			gene10505	gene6501	gene10225		gene9803	725309	LOC725309	keratin-associated protein 19-2
gene1256	gene1256	gene12057	gene1036	gene11822			gene12057	gene5121	gene3867		gene1256	551418	LOC551418	60S ribosomal protein L13a
gene7554	gene7554	gene38	gene11559	gene4235			gene6897	gene5126	gene4721		gene7554	411323	5-HT2alpha	serotonin receptor isoform X2
gene4879	gene4879	gene5818	gene11063	gene296			gene2795	gene7695	gene11080		gene4879	408867	LOC408867	alpha,alpha-trehalose-phosphate synthase
gene12193	gene12193	gene2720	gene594	gene469			gene9178	gene173	gene2328		gene12193	552564	LOC552564	40S ribosomal protein S7
gene4206	gene4206	gene7498	gene7732	gene7632			gene5816	gene2398	gene4130		gene4206	409167	LOC409167	translation elongation factor 2 isoform X2
gene3808	gene3808	gene4254	gene4417	gene950			gene7987	gene11628	gene10501		gene3808	102655905	LOC102655905	uncharacterized protein LOC102655905
gene2062	gene2062	gene7417	gene4723	gene8187			gene9016	gene1887	gene1894		gene2062	410869	LOC410869	vacuolar-sorting protein SNF8 isoform X2
gene7045	gene7045	gene6471	gene2294	gene11358			gene2306	gene8472	gene2590		gene7045	113218923	LOC113218923
gene9062	gene9062	gene9856	gene11356	gene5163			gene6657	gene9835	gene2532		gene9062	408354	LOC408354	nuclear factor of activated T-cells 5 isoform X2
gene3573	gene3573	gene11768	gene7654	gene8896			gene4130	gene7069	gene6482		gene3573	408811	LOC408811	transmembrane and coiled-coil domains protein 2 isoform X1
gene11417	gene11417	gene5226	gene10143	gene7344			gene8829	gene10262	gene897		gene11417	725248	LOC725248	dedicator of cytokinesis protein 1 isoform X2
gene9452	gene9452	gene3202	gene4871	gene7009			gene11449	gene11216	gene5566		gene9452	412154	LOC412154	probable cytosolic oligopeptidase A isoform X1
gene2186	gene2186	gene2393	gene10402	gene7640			gene5517	gene6138	gene9870		gene2186	550663	LOC550663	putative oxidoreductase GLYR1 homolog
gene8896	gene8896	gene2626	gene1491	gene9654			gene7291	gene9167	gene3581		gene8896	409695	LOC409695	uncharacterized protein LOC409695 isoform X1
gene9460	gene9460	gene9077	gene9936	gene7629			gene9983	gene339	gene8027		gene9460	552254	LOC552254	uncharacterized protein F21D5.5 isoform X1
gene2924	gene2924	gene2352	gene2411	gene4847			gene9686	gene1026	gene11142		gene2924	551375	LOC551375	receptor-type tyrosine-protein phosphatase N2 isoform X1
gene5469	gene5469	gene5848	gene2384	gene4543			gene2288	gene3597	gene10093		gene5469	552224	LOC552224	dynein heavy chain 1, axonemal
gene11129	gene11129	gene6460	gene5939	gene10399			gene2924	gene9252	gene3132		gene11129	409253	LOC409253	glutamate dehydrogenase, mitochondrial isoform X1
gene5594	gene5594	gene4917	gene8842	gene10459			gene9794	gene5303	gene3605		gene5594	409055	LOC409055	V-type proton ATPase subunit H isoform X2
gene5203	gene5203	gene1282	gene2873	gene7045			gene11660	gene11899	gene1739		gene5203	724656	LOC724656	RNA cytidine acetyltransferase
gene1916	gene1916	gene1669	gene2389	gene11994			gene6261	gene151	gene989		gene1916	107966102	LOC107966102
gene4774	gene4774	gene315	gene2616	gene961			gene5461	gene2288	gene8123		gene4774	102654528	LOC102654528
gene5034	gene5034	gene10168	gene11211	gene4855			gene9502	gene11539	gene251		gene5034	551658	LOC551658	LOW QUALITY PROTEIN: anillin
gene10901	gene10901	gene5546	gene4316	gene10400			gene4275	gene11129	gene6002		gene10901	410515	LOC410515	uncharacterized protein LOC410515
gene38	gene38	gene4535	gene7470	gene2611			gene11821	gene10804	gene3865		gene38	100216325	Emc	extra macrochaetae
gene2815	gene2815	gene7325	gene9364	gene11293			gene8835	gene1308	gene2466		gene2815	410947	LOC410947	tyrosine decarboxylase
gene1476	gene1476	gene6575	gene7362	gene328			gene8472	gene1420	gene5469		gene1476	552068	LOC552068	protein phosphatase 1L isoform X2
gene10404	gene10404	gene4629	gene4734	gene7616			gene2387	gene6658	gene3447		gene10404	102656439	LOC102656439	adenosine deaminase 2
gene1041	gene1041	gene1367	gene11926	gene8748			gene10889	gene9754	gene2133		gene1041	725238	LOC725238	histone H1
gene4855	gene4855	gene3316	gene6205	gene7241			gene3605	gene948	gene5494		gene4855	552301	LOC552301	chymotrypsin-1
gene9864	gene9864	gene401	gene3135	gene12119			gene1407	gene6781	gene8007		gene9864	552110	LOC552110	uncharacterized protein LOC552110
gene913	gene913	gene10026	gene4695	gene3682			gene3204	gene2795	gene8073		gene913	409238	LOC409238	43 kDa receptor-associated protein of the synapse homolog
gene2611	gene2611	gene6779	gene3193	gene1005			gene10391	gene12132	gene76		gene2611	409587	Hsc70-3	heat shock protein cognate 3 precursor
gene2598	gene2598	gene4104	gene1874	gene7676			gene1367	gene4076	gene6008		gene2598	408759	LOC408759	uncharacterized protein LOC408759 isoform X1
gene9129	gene9129	gene3890	gene10673	gene7049			gene4771	gene324	gene1804		gene9129	100578547	LOC100578547	uncharacterized protein LOC100578547
gene12161	gene12161	gene11979	gene11649	gene11908			gene6574	gene6639	gene9864		gene12161	725395	LOC725395	bifunctional glutamate/proline--tRNA ligase
gene9825	gene9825	gene4745	gene4367	gene10951			gene952	gene7453	gene3771		gene9825	412460	LOC412460	putative cystathionine gamma-lyase 2 isoform X1
gene6771	gene6771	gene9601	gene1092	gene952			gene11588	gene11126	gene9509		gene6771	408967	LOC408967	calcium-binding mitochondrial carrier protein Aralar1 isoform X8
gene389	gene389	gene7663	gene4857	gene7207			gene5272	gene891	gene9178		gene389	412287	LOC412287	FK506-binding protein 59 isoform X1
gene2328	gene2328	gene7586	gene2346	gene1381			gene8123	gene3236	gene12244		gene2328	102654200	LOC102654200
gene4933	gene4933	gene3204	gene8830	gene8496			gene4356	gene4169	gene7701		gene4933	410005	LOC410005	beta-1,4-glucuronyltransferase 1
gene11288	gene11288	gene10110	gene11205	gene8256			gene2507	gene102	gene7522		gene11288	552795	LOC552795	cholinephosphotransferase 1 isoform X7
gene3636	gene3636	gene9585	gene11574	gene1186			gene4206	gene9306	gene5664		gene3636	107964304	LOC107964304	uncharacterized protein LOC107964304
gene9453	gene9453	gene8386	gene1691	gene8852			gene8073	gene2428	gene8260		gene9453	100577623	LOC100577623	putative uncharacterized protein DDB_G0282133
gene7344	gene7344	gene4509	gene1730	gene10901			gene3152	gene9466	gene5381		gene7344	102653793	LOC102653793	succinate--hydroxymethylglutarate CoA-transferase isoform X2
gene4360	gene4360	gene3642	gene3305	gene4933			gene2398	gene9318	gene7917		gene4360	551619	LOC551619	transmembrane protein 8B
gene8852	gene8852	gene556	gene7709	gene9945			gene7093	gene6370	gene5505		gene8852	727236	LOC727236	uncharacterized protein CG5098 isoform X4
gene6670	gene6670	gene3625	gene3875	gene6280			gene8811	gene6657	gene5487		gene6670	409065	LOC409065	TAR DNA-binding protein 43 isoform X1
gene8431	gene8431	gene1033	gene7999	gene3471			gene339	gene1584	gene1022		gene8431	724334	LOC724334	ras-interacting protein RIP3
gene9463	gene9463	gene6196	gene6319	gene7428			gene11000	gene11281	gene1066		gene9463	725540	LOC725540	uncharacterized protein LOC725540
gene11600	gene11600	gene1142	gene10768	gene10317			gene6590	gene8811	gene4931		gene11600	409318	LOC409318	Kv channel-interacting protein 1 isoform X2
gene786	gene786	gene219	gene2935	gene2516			gene3236	gene10783	gene9153		gene786	409093	LOC409093	flocculation protein FLO11 isoform X1
gene983	gene983	gene11630	gene4267	gene505			gene8962	gene11821	gene1067		gene983	409282	LOC409282	bromodomain-containing protein DDB_G0280777 isoform X2
gene7326	gene7326	gene9788	gene10791	gene11389			gene8510	gene658	gene6710		gene7326	107964958	LOC107964958	uncharacterized protein LOC107964958
gene1202	gene1202	gene10622	gene11784	gene7252			gene5323	gene8835	gene208		gene1202	412778	LOC412778	chondroitin sulfate proteoglycan 4
gene1325	gene1325	gene10450	gene4125	gene1710			gene1028	gene5792	gene10191		gene1325	551792	LOC551792	cytosolic carboxypeptidase 1 isoform X3
gene491	gene491	gene3416	gene6801	gene9227			gene2603	gene3445	gene4275		gene491	102656814	LOC102656814
gene5757	gene5757	gene1341	gene7893	gene5184			gene11443	gene3991	gene10302		gene5757	413333	LOC413333	hemicentin-2
gene7616	gene7616	gene8693	gene4765	gene9659			gene3354	gene10118	gene5325		gene7616	408996	LOC408996	1-phosphatidylinositol 4,5-bisphosphate phosphodiesterase
gene12119	gene12119	gene8697	gene8132	gene11417			gene7917	gene5203	gene11122		gene12119	100578237	LOC100578237	uncharacterized protein PF11_0213
gene3771	gene3771	gene8361	gene6721	gene10346			gene8813	gene10627	gene10169		gene3771	724216	LOC724216	juvenile hormone acid O-methyltransferase
gene434	gene434	gene2055	gene953	gene2476			gene10118	gene2186	gene9117		gene434	724721	LOC724721	farnesol dehydrogenase
gene7917	gene7917	gene1206	gene6977	gene8413			gene6674	gene11318	gene9154		gene7917	724995	LOC724995	1-acyl-sn-glycerol-3-phosphate acyltransferase alpha
gene11744	gene11744	gene11564	gene7086	gene742			gene5621	gene3330	gene3383		gene11744	726510	LOC726510	M-phase inducer phosphatase 1 isoform X1
gene8430	gene8430	gene1914	gene248	gene8933			gene12193	gene8181	gene10309		gene8430	100576452	LOC100576452
gene238	gene238	gene7430	gene11181	gene6698			gene5589	gene7475	gene11858		gene238	100577369	LOC100577369	HEAT repeat-containing protein 6 isoform X1
gene5664	gene5664	gene5478	gene3600	gene3658			gene5188	gene10940			gene5664	408868	LOC408868	inositol monophosphatase 1 isoform X1
gene4336	gene4336	gene11259	gene1833	gene4175			gene208	gene5459			gene4336	412965	LOC412965	synaptotagmin-14 isoform X2
gene9348	gene9348	gene9212	gene11704	gene1612			gene4360	gene1028			gene9348	725051	LOC725051	multidrug resistance-associated protein 4 isoform X1
gene12210	gene12210	gene156	gene5287	gene10239			gene12018	gene3007			gene12210	411816	LOC411816	cytoplasmic dynein 1 light intermediate chain 2 isoform X1
gene11899	gene11899	gene10130	gene9118	gene264			gene1131	gene12210			gene11899	413891	LOC413891	NADH-ubiquinone oxidoreductase 49 kDa subunit isoform X1
gene6819	gene6819	gene4896	gene10596	gene5824			gene3110	gene7180			gene6819	411273	LOC411273	probable serine/threonine-protein kinase clkA isoform X1
gene249	gene249	gene11340	gene8711	gene8948			gene8259	gene5400			gene249	414038	LOC414038	protein ABHD11 isoform X2
gene9114	gene9114	gene4282	gene7004	gene12007			gene5182	gene571			gene9114	408369	LOC408369	putative glutathione-specific gamma-glutamylcyclotransferase 2
gene7418	gene7418	gene3718	gene11674	gene2215			gene76	gene569			gene7418	411899	B-gluc1	gram-negative bacteria-binding protein 1-2 isoform X1
gene10840	gene10840	gene390	gene6258	gene1537			gene3571	gene952			gene10840	409902	LOC409902	liprin-alpha-2 isoform X11
gene11888	gene11888	gene841	gene1472	gene7447			gene1142	gene575			gene11888	411525	LOC411525	choline/ethanolamine kinase isoform X2
gene2723	gene2723	gene4474	gene3175	gene4773			gene3508	gene4798			gene2723	410091	LOC410091	ras guanine nucleotide exchange factor P isoform X1
gene8851	gene8851	gene7405	gene8555	gene3348			gene4560	gene238			gene8851	727502	LOC727502	uncharacterized protein LOC727502
gene8429	gene8429	gene2465	gene5726	gene1041			gene5077	gene11473			gene8429	408275	LOC408275	uncharacterized protein LOC408275 isoform X1
gene5325	gene5325	gene1462	gene7162	gene11288			gene1256	gene1621			gene5325	411387	LOC411387	O-acyltransferase like protein isoform X1
gene8062	gene8062	gene4151	gene196	gene5633			gene10754	gene8534			gene8062	412638	LOC412638	kinesin-like protein KIF14
gene8862	gene8862	gene2789	gene9335	gene11887			gene10661	gene244			gene8862	412972	LOC412972	WD repeat domain phosphoinositide-interacting protein 3
gene8258	gene8258	gene843	gene10124	gene9460			gene5221	gene3354			gene8258	552658	LOC552658	DNA-directed RNA polymerase III subunit RPC2 isoform X2
gene4517	gene4517	gene5716	gene9815	gene8714			gene10627	gene11015			gene4517	408845	LOC408845	protein unc-79 homolog isoform X1
gene1131	gene1131	gene8383	gene8584	gene875			gene11600	gene11854			gene1131	551680	LOC551680	glycine receptor subunit alpha-4 isoform X1
gene6482	gene6482	gene6593	gene585	gene10304			gene5664	gene7087			gene6482	725483	LOC725483	gustatory receptor for sugar taste 43a
gene4431	gene4431	gene363	gene1760	gene7761			gene6757	gene9260			gene4431	409155	LOC409155	dihydrolipoyllysine-residue succinyltransferase component of 2-oxoglutarate dehydrogenase complex, mitochondrial isoform X1
gene4543	gene4543	gene11497	gene3979	gene1723			gene11142	gene10694			gene4543	409060	LOC409060	golgin subfamily A member 6-like protein 22
gene1827	gene1827	gene471	gene10474	gene5081			gene9453	gene11892			gene1827	408706	LOC408706	97 kDa heat shock protein isoform X2
gene2763	gene2763	gene11575	gene566	gene7628			gene2590	gene1387			gene2763	410114	LOC410114	solute carrier family 23 member 1 isoform X1
gene1104	gene1104	gene6280	gene1741	gene6149			gene4798	gene11146			gene1104	724904	LOC724904	acylphosphatase-2 isoform X1
gene4896	gene4896	gene4246	gene8571	gene4517			gene2210	gene11846			gene4896	551086	LOC551086	zinc finger protein chinmo isoform X1
gene11663	gene11663	gene793	gene10689	gene283			gene11539	gene5971			gene11663	413959	LOC413959	multidrug resistance-associated protein 4
gene2746	gene2746	gene7584	gene6075	gene8549			gene5608	gene3302			gene2746	412846	LOC412846	NAD-dependent protein deacetylase Sirt6
gene2532	gene2532	gene1347	gene11420	gene11481			gene2395	gene6771			gene2532	102653952	LOC102653952	uncharacterized protein LOC102653952
gene15	gene15	gene10334	gene4181	gene1725			gene390	gene8274			gene15	408565	LOC408565	zinc finger protein on ecdysone puffs isoform X1
gene2956	gene2956	gene7585	gene4702	gene237			gene1887	gene11783			gene2956	100578925	LOC100578925	protein Tob1
gene5184	gene5184	gene5979	gene10959	gene6203			gene4735	gene11660			gene5184	102654860	LOC102654860	uncharacterized protein LOC102654860 isoform X1
gene690	gene690	gene1809	gene7810	gene8858			gene306	gene10009			gene690	552140	LOC552140	cleavage and polyadenylation specificity factor subunit 5
gene2857	gene2857	gene7816	gene11418	gene7996			gene10302	gene6697			gene2857	409872	LOC409872	TRPL translocation defect protein 14 isoform X2
gene4180	gene4180	gene10461	gene4214	gene5106			gene324	gene8986			gene4180	411071	LOC411071	dnaJ protein homolog 1
gene6275	gene6275	gene9722	gene8207	gene8259			gene2822	gene8702			gene6275	100576699	LOC100576699
gene3309	gene3309	gene4727	gene5616	gene5935			gene9318	gene6675			gene3309	408766	LOC408766	phosphatidylcholine:ceramide cholinephosphotransferase 2 isoform X6
gene5163	gene5163	gene12181	gene5838	gene766			gene4905	gene6369			gene5163	725217	LOC725217	uncharacterized protein PFB0145c isoform X1
gene86	gene86	gene10043	gene11086	gene3303			gene1368	gene9382			gene86	113218523	LOC113218523	uncharacterized protein LOC113218523
gene4103	gene4103	gene9800	gene4368	gene8152			gene7696	gene9452			gene4103	409063	LOC409063	cysteine sulfinic acid decarboxylase
gene6821	gene6821	gene4203	gene8184	gene8285			gene5422	gene6265			gene6821	107964906	LOC107964906
gene5416	gene5416	gene9170	gene6392	gene2003			gene5416	gene916			gene5416	100577636	LOC100577636	zwei Ig domain protein zig-8
gene5106	gene5106	gene207	gene7934	gene6175			gene10309	gene7796			gene5106	413189	LOC413189	NADH-cytochrome b5 reductase 2 isoform X1
gene4931	gene4931	gene701	gene143	gene9772			gene3527	gene9051			gene4931	102656738	LOC102656738	uncharacterized protein LOC102656738
gene4761	gene4761	gene3892	gene1563	gene2524			gene4931	gene8829			gene4761	552611	LOC552611	protein ABHD4 isoform X1
gene10025	gene10025	gene5224	gene6115	gene2746			gene2938	gene709			gene10025	408384	LOC408384	transcriptional adapter 2-alpha
gene10886	gene10886	gene4735	gene7698	gene6279			gene8534				gene10886	100576814	LOC100576814	uncharacterized protein LOC100576814 isoform X2
gene9911	gene9911	gene469	gene4829	gene4478			gene1810				gene9911	411508	LOC411508	tubulin gamma-2 chain
gene11281	gene11281	gene9281	gene10736	gene3183			gene10940				gene11281	551958	LOC551958	uncharacterized protein LOC551958
gene6369	gene6369	gene1941	gene9984	gene1854			gene11893				gene6369	552528	LOC552528	calnexin isoform X1
gene1186	gene1186	gene10655	gene7739	gene6636			gene7014				gene1186	411700	LOC411700	heat shock protein 83
gene5573	gene5573	gene1554	gene11981	gene10093			gene6482				gene5573	100576395	Kr-h1	Krueppel homologous protein 1
gene1053	gene1053	gene9969	gene11793	gene7690			gene9615				gene1053	100577239	LOC100577239	uncharacterized LOC100577239 isoform X1
gene7695	gene7695	gene5283	gene3280	gene2325			gene8043				gene7695	551093	LOC551093	V-type proton ATPase catalytic subunit A
gene1539	gene1539	gene10459	gene1548	gene2210			gene3575				gene1539	412263	LOC412263	endoplasmic reticulum aminopeptidase 1 isoform X2
gene10984	gene10984	gene5880	gene2317	gene9798			gene8197				gene10984	408470	LOC408470	NAD kinase isoform X2
gene3830	gene3830	gene11925	gene2135	gene4496			gene9252				gene3830	410999	LOC410999	L-2-hydroxyglutarate dehydrogenase, mitochondrial isoform X1
gene79	gene79	gene7932	gene1551	gene7832			gene164				gene79	751098	Glob1	globin 1
gene1066	gene1066	gene7536	gene6516	gene10404			gene7180				gene1066	102653680	LOC102653680	centrosomal protein of 78 kDa-like
gene7115	gene7115	gene1942	gene5619	gene6740			gene9199				gene7115	408955	LOC408955	4-aminobutyrate aminotransferase, mitochondrial isoform X1
gene1686	gene1686	gene11723	gene5361	gene11164			gene5699				gene1686	102654955	LOC102654955	ATP synthase subunit b, mitochondrial
gene3794	gene3794	gene9983	gene6290	gene731			gene9864				gene3794	102656934	LOC102656934	stress-induced-phosphoprotein 1
gene6890	gene6890	gene3270	gene4122	gene488			gene7952				gene6890	552215	LOC552215	uncharacterized protein LOC552215
gene11939	gene11939	gene7165	gene7029	gene4180			gene9871				gene11939	409423	LOC409423	male-specific lethal 1 homolog isoform X2
gene10728	gene10728	gene1103	gene7058	gene605			gene7910				gene10728	411972	LOC411972	probable phosphatase PSR2 isoform X1
gene4942	gene4942	gene158	gene1703	gene5041			gene10475				gene4942	724783	LOC724783	uncharacterized protein LOC724783
gene6897	gene6897	gene5171	gene5343	gene438			gene4721				gene6897	551572	LOC551572	uncharacterized protein LOC551572 isoform X1
gene9680	gene9680	gene842	gene10543	gene2877			gene237				gene9680	100578102	LOC100578102
gene193	gene193	gene4892	gene9877	gene5034			gene10264				gene193	100578752	LOC100578752	uncharacterized protein LOC100578752
gene6757	gene6757	gene12045	gene3375	gene11910			gene11105				gene6757	411820	LOC411820	dual specificity protein phosphatase Mpk3
gene2804	gene2804	gene2394	gene5207	gene3992			gene3556				gene2804	726282	LOC726282	uncharacterized protein LOC726282
gene1810	gene1810	gene1900	gene5172	gene7167			gene1677				gene1810	725396	LOC725396	THO complex subunit 4
gene5566	gene5566	gene2578	gene1779	gene3606			gene5552				gene5566	107964640	LOC107964640	uncharacterized protein LOC107964640
gene12157	gene12157	gene1539	gene810				gene11971				gene12157	685996	Su(var)3-9	suppressor of variegation 3-9 isoform 2
gene10014	gene10014	gene10014	gene7865				gene12250				gene10014	410398	LOC410398	insulin-like growth factor 2 mRNA-binding protein 1 isoform X1
gene4129	gene4129	gene2859	gene7657				gene320				gene4129	409781	LOC409781	uncharacterized protein LOC409781
gene4997	gene4997	gene10351	gene12184				gene5694				gene4997	409442	LOC409442	protein NipSnap
gene4663	gene4663	gene5552	gene8532				gene5842				gene4663	411122	LOC411122	splicing factor 1 isoform X1
gene11539	gene11539	gene6294	gene11947				gene2466				gene11539	411724	LOC411724	glycerol-3-phosphate acyltransferase 1, mitochondrial isoform X1
gene8378	gene8378	gene5295	gene4423				gene387				gene8378	410122	LOC410122	glyceraldehyde-3-phosphate dehydrogenase 2
gene5940	gene5940	gene10493	gene3259				gene7873				gene5940	409851	LOC409851	amphiphysin isoform X1
gene10733	gene10733	gene5555	gene10042				gene9117				gene10733	727642	LOC727642	dnaJ homolog subfamily B member 13-like
gene5303	gene5303	gene7912	gene5891				gene3581				gene5303	551087	LOC551087	periodic tryptophan protein 2 homolog
gene2938	gene2938	gene10658	gene10958				gene86				gene2938	551169	LOC551169	succinate dehydrogenase
gene5744	gene5744	gene11724	gene1242				gene5093				gene5744	413410	LOC413410	IQ motif and SEC7 domain-containing protein 2 isoform X3
gene7093	gene7093	gene1379	gene4669				gene11841				gene7093	413197	LOC413197	G protein-coupled receptor kinase 1 isoform X2
gene10317	gene10317	gene12029	gene5743				gene2263				gene10317	113219200	LOC113219200
gene3090	gene3090	gene6336	gene5798				gene4042				gene3090	113218674	LOC113218674
gene3769	gene3769	gene8461	gene6822				gene3447				gene3769	408792	LOC408792	protein 4.1 homolog isoform X1
gene437	gene437	gene5715	gene11384				gene2804				gene437	409360	LOC409360	fatty acid hydroxylase domain-containing protein 2 isoform X3
gene2114	gene2114	gene9745	gene4511				gene9051				gene2114	724211	LOC724211	cytochrome P450 9e2
gene10239	gene10239	gene7862	gene5473				gene983				gene10239	410427	LOC410427	serine/threonine-protein kinase 26 isoform X4
gene4773	gene4773	gene2879	gene3131				gene4463				gene4773	411739	LOC411739	stromal interaction molecule homolog isoform X1
gene11343	gene11343	gene1148	gene1046				gene7405				gene11343	551213	LOC551213	lymphocyte cytosolic protein 2 isoform X1
gene6518	gene6518	gene9109	gene2774				gene3003				gene6518	414009	LOC414009	microprocessor complex subunit DGCR8 isoform X1
gene4940	gene4940	gene6612	gene373				gene1229				gene4940	102655889	LOC102655889	uncharacterized protein PF11_0213
gene3032	gene3032	gene6586	gene5127				gene10984				gene3032	410926	LOC410926	PH domain leucine-rich repeat-containing protein phosphatase 2
gene1464	gene1464	gene5606	gene10883				gene7415				gene1464	413551	LOC413551	mitochondrial coenzyme A transporter SLC25A42
gene1255	gene1255	gene11663	gene2348				gene1395				gene1255	412406	LOC412406	PH-interacting protein
gene2831	gene2831	gene2395	gene12005				gene11216				gene2831	409335	LOC409335	probable serine hydrolase isoform X2
gene7486	gene7486	gene2931	gene735				gene2186				gene7486	726167	LOC726167	lipopolysaccharide-induced tumor necrosis factor-alpha factor homolog
gene8968	gene8968	gene2229	gene1770				gene7447				gene8968	552309	LOC552309	pecanex-like protein 1
gene7796	gene7796	gene4344	gene6326				gene1787				gene7796	725224	LOC725224	LOW QUALITY PROTEIN: uncharacterized protein LOC725224
gene10627	gene10627	gene8686	gene327				gene3867				gene10627	551118	LOC551118	UPF0472 protein C16orf72 homolog
gene1404	gene1404	gene1088	gene6323				gene10694				gene1404	726062	LOC726062	methyltransferase-like 26
gene269	gene269	gene6842	gene8340				gene7522				gene269	725745	LOC725745	GPN-loop GTPase 1
gene173	gene173	gene5196	gene4453				gene5573				gene173	408623	LOC408623	endophilin-A isoform X1
gene4776	gene4776	gene10751	gene2412				gene4127				gene4776	552797	LOC552797	ETS-related transcription factor Elf-5
gene12015	gene12015	gene5540	gene4212				gene1938				gene12015	552318	LOC552318	60S ribosomal protein L27a
gene7640	gene7640	gene988	gene3346				gene1018				gene7640	406123	Psq	pipsqueak
gene6710	gene6710	gene10626	gene7681				gene9463				gene6710	102655968	LOC102655968
gene4965	gene4965	gene11218	gene8108				gene2211				gene4965	409721	LOC409721	uncharacterized protein YER152C
gene3027	gene3027	gene6576	gene5433				gene11472				gene3027	551538	LOC551538	lysine--tRNA ligase isoform X2
gene1420	gene1420	gene5249	gene10981				gene740				gene1420	409288	LOC409288	tribbles homolog 2
gene9204	gene9204	gene9169	gene8511				gene10299				gene9204	408315	LOC408315	ceramide kinase isoform X1
gene10360	gene10360	gene10960	gene12318				gene11336				gene10360	100578263	LOC100578263	uncharacterized protein LOC100578263
gene11000	gene11000	gene10268	gene2710				gene3808				gene11000	408473	LOC408473	uncharacterized protein LOC408473
gene11971	gene11971	gene754	gene6802				gene569				gene11971	100576709	LOC100576709	uncharacterized protein LOC100576709 isoform X7
gene3681	gene3681	gene9876	gene8202				gene8410				gene3681	724368	LOC724368	dnaJ homolog subfamily A member 1
gene11017	gene11017	gene11614	gene6347				gene8033				gene11017	551766	LOC551766	ATP synthase subunit beta, mitochondrial
gene10400	gene10400	gene1474	gene9982				gene4624				gene10400	100577091	LOC100577091	uncharacterized protein LOC100577091 isoform X1
gene875	gene875	gene4189	gene1867				gene3991				gene875	100578389	LOC100578389	uncharacterized protein LOC100578389 isoform X1
gene12284	gene12284	gene1518	gene8143				gene3642				gene12284	725756	LOC725756	beta-galactosidase
gene1272	gene1272	gene9172	gene1556				gene784				gene1272	410673	LOC410673	protein RRNAD1
gene8790	gene8790	gene305	gene9980				gene6501				gene8790	409784	LOC409784	uncharacterized protein LOC409784 isoform X4
gene8990	gene8990	gene6240	gene322				gene614				gene8990	725821	LOC725821	uncharacterized LOC725821
gene9172	gene9172	gene5129	gene3521				gene11939				gene9172	409260	LOC409260	epidermal retinol dehydrogenase 2 isoform X1
gene11841	gene11841	gene10336	gene3916				gene8062				gene11841	412503	LOC412503	mitochondrial dicarboxylate carrier isoform X2
gene8154	gene8154	gene5981	gene275				gene3090				gene8154	725949	LOC725949	protein pigeon isoform X2
gene1425	gene1425	gene8448	gene4989				gene658				gene1425	552660	LOC552660	ubiquitin carboxyl-terminal hydrolase 46 isoform X1
gene11821	gene11821	gene3374	gene2933				gene3865				gene11821	552634	LOC552634	zinc transporter 1 isoform X1
gene2166	gene2166	gene11023	gene9345				gene1001				gene2166	551330	LOC551330	40S ribosomal protein S3
gene8591	gene8591	gene2870	gene7455				gene1804				gene8591	552468	LOC552468	MATH and LRR domain-containing protein PFE0570w-like isoform X2
gene10475	gene10475	gene7616	gene764				gene1039				gene10475	551250	LOC551250	microsomal triglyceride transfer protein large subunit
gene3812	gene3812	gene10384	gene11202				gene739				gene3812	413137	LOC413137	60S ribosomal protein L15
gene6385	gene6385	gene7052	gene656				gene10791				gene6385	409565	LOC409565	probable cationic amino acid transporter isoform X1
gene2306	gene2306	gene5146	gene3328				gene10026				gene2306	726589	LOC726589	dentin matrix acidic phosphoprotein 1
gene11893	gene11893	gene2839	gene6940				gene11122				gene11893	411576	LOC411576	phosphoglycerate kinase
gene11294	gene11294	gene8600	gene3238				gene5022				gene11294	727622	LOC727622	probable aspartate aminotransferase, cytoplasmic
gene3383	gene3383	gene7561	gene9413				gene11783				gene3383	113218711	LOC113218711
gene3867	gene3867	gene11973	gene3410				gene11892				gene3867	552475	ACSF2	acyl-CoA synthetase family member 2, mitochondrial isoform X1
gene5188	gene5188	gene4900	gene12054				gene4416				gene5188	411173	LOC411173	torso-like protein
gene8714	gene8714	gene2097	gene9394				gene12181				gene8714	725452	LOC725452	uncharacterized protein LOC725452
gene2839	gene2839	gene6412	gene6086				gene4579				gene2839	724603	LOC724603	receptor-type guanylate cyclase Gyc76C-like
gene11272	gene11272	gene10316	gene5567				gene6781				gene11272	724207	LOC724207	phospholipid scramblase 2 isoform X1
gene426	gene426	gene6043	gene11696				gene5325				gene426	414022	LOC414022	ankyrin repeat domain-containing protein 12 isoform X1
gene2288	gene2288	gene3000	gene3953				gene9466				gene2288	552183	LOC552183	phosphatidylinositol transfer protein alpha isoform
gene5143	gene5143	gene3037	gene11066				gene4896				gene5143	107964582	LOC107964582
gene140	gene140	gene2325	gene11689				gene897				gene140	724901	LOC724901	bleomycin hydrolase isoform X2
gene10238	gene10238	gene1396	gene11363				gene9593				gene10238	408408	LOC408408	uncharacterized protein LOC408408
gene2428	gene2428	gene8628	gene6580				gene6771				gene2428	726035	Ndufs1	NADH-ubiquinone oxidoreductase 75 kDa subunit, mitochondrial
gene1352	gene1352	gene4887	gene10585				gene3007				gene1352	410784	LOC410784	putative GTP-binding protein 6
gene10900	gene10900	gene4343	gene11717				gene10992				gene10900	410514	LOC410514	uncharacterized protein LOC410514 isoform X4
gene9148	gene9148	gene6849	gene7444				gene6262				gene9148	552282	LOC552282	probable Bax inhibitor 1
gene390	gene390	gene9603	gene12189				gene948				gene390	552316	LOC552316	GMP reductase 1
gene3932	gene3932	gene3348	gene11245				gene1352				gene3932	102655609	LOC102655609
gene1105	gene1105	gene10318	gene74				gene754				gene1105	100578281	LOC100578281	rab3 GTPase-activating protein non-catalytic subunit isoform X1
gene2387	gene2387	gene5415	gene6506				gene6138				gene2387	408650	LOC408650	inositol oxygenase
gene10262	gene10262	gene9880	gene9339				gene1709				gene10262	726456	LOC726456	unconventional myosin-Va isoform X1
gene2002	gene2002	gene605	gene5692				gene4169				gene2002	726783	LOC726783	vitellogenin
gene10801	gene10801	gene11803	gene5799				gene1066				gene10801	725575	LOC725575	protein PELPK1
gene1803	gene1803	gene2684	gene8223				gene2313				gene1803	725119	LOC725119	phospholipase D2 isoform X1
gene505	gene505	gene8893	gene6667				gene7978				gene505	726451	LOC726451	cuticle protein 16.8
gene5272	gene5272	gene7674	gene9369				gene11015				gene5272	102656388	LOC102656388
gene8697	gene8697	gene2965	gene8337				gene9508				gene8697	409124	LOC409124	twisted gastrulation protein homolog 1-A isoform X1
gene8210	gene8210	gene4490	gene5465				gene3771				gene8210	408295	LOC408295	probable serine/threonine-protein kinase DDB_G0282963 isoform X1
gene1725	gene1725	gene2111	gene474				gene11146				gene1725	113218529	LOC113218529
gene6574	gene6574	gene10335	gene729				gene5559				gene6574	100577028	LOC100577028	insulin-like growth factor I isoform X2
gene3110	gene3110	gene66	gene4590				gene10935				gene3110	410079	LOC410079	zinc finger protein 385B isoform X1
gene12250	gene12250	gene5033	gene1171				gene9260				gene12250	410659	LOC410659	golgin subfamily A member 1 isoform X2
gene7690	gene7690	gene8429	gene822				gene10191				gene7690	552561	LOC552561	inactive ubiquitin carboxyl-terminal hydrolase MINDY-4B isoform X1
gene11344	gene11344	gene6256	gene7342				gene1282				gene11344	409355	LOC409355	glutaredoxin 3
gene2021	gene2021	gene6637	gene1846				gene5597				gene2021	726956	LOC726956	Golgi membrane protein 1 isoform X2
gene1568	gene1568	gene5404	gene9046				gene3161				gene1568	727460	LOC727460	FERM domain-containing protein 5 isoform X1
gene2327	gene2327	gene4140	gene1052				gene11080				gene2327	724852	LOC724852	LHFPL tetraspan subfamily member 6 protein isoform X1
gene7632	gene7632	gene2735	gene10027				gene7989				gene7632	725336	LOC725336	longitudinals lacking protein isoform X44
gene3813	gene3813	gene2255	gene10692				gene11297				gene3813	725703	LOC725703	uncharacterized protein LOC725703
gene8123	gene8123	gene9055	gene4079				gene7453				gene8123	100577759	LOC100577759	uncharacterized protein LOC100577759 isoform X2
gene12115	gene12115	gene6903	gene8510				gene8274				gene12115	551252	LOC551252	tropomyosin
gene3068	gene3068	gene1479	gene3154				gene5478				gene3068	408733	LOC408733	protein pinocchio isoform X2
gene1534	gene1534	gene1728	gene8782				gene3445				gene1534	724994	LOC724994	probable tyrosine-protein phosphatase F54C8.4
gene3530	gene3530	gene5987	gene7670				gene8007				gene3530	409173	LOC409173	esterase FE4
gene8873	gene8873	gene4461	gene5110				gene11367				gene8873	552313	LOC552313	sterol O-acyltransferase 1
gene2466	gene2466	gene10756	gene4971				gene5457				gene2466	550691	LOC550691	putative inorganic phosphate cotransporter isoform X1
gene3152	gene3152	gene11294	gene11049				gene701				gene3152	724559	LOC724559	cell cycle checkpoint protein RAD17
gene7049	gene7049	gene7960	gene498				gene3032				gene7049	409533	LOC409533	annexin B9 isoform X3
gene4042	gene4042	gene8683	gene2766				gene4738				gene4042	411058	LOC411058	uncharacterized protein LOC411058
gene665	gene665	gene5479	gene1368				gene7142				gene665	409103	LOC409103	protoheme IX farnesyltransferase, mitochondrial
gene11630	gene11630	gene3725	gene8498				gene4981				gene11630	726905	LOC726905	cilia- and flagella-associated protein 61-like
gene10391	gene10391	gene1272	gene5814				gene4254				gene10391	408434	LOC408434	EGF domain-specific O-linked N-acetylglucosamine transferase isoform X2
gene11654	gene11654	gene5785	gene9432				gene9325				gene11654	406111	Dop1	dopamine receptor, D1
gene1787	gene1787	gene4503	gene10866				gene1053				gene1787	411955	LOC411955	uncharacterized protein LOC411955 isoform X1
gene7992	gene7992	gene4462	gene7415				gene9452				gene7992	551756	LOC551756	protein crooked neck
gene4296	gene4296	gene8687	gene6012				gene5400				gene4296	725362	LOC725362	protein arginine N-methyltransferase 1 isoform X1
gene8748	gene8748	gene6054	gene861				gene3736				gene8748	725069	LOC725069	peptide transporter family 1 isoform X1
gene1738	gene1738	gene12033	gene6674				gene6098				gene1738	724405	LOC724405	protein lethal(2)essential for life
gene3007	gene3007	gene9012	gene1107				gene6369				gene3007	413089	LOC413089	protein spinster isoform X1
gene8328	gene8328	gene7085	gene5728				gene491				gene8328	551143	LOC551143	inositol-3-phosphate synthase 1-B isoform X1
gene11178	gene11178	gene1098	gene7293				gene9071				gene11178	102654757	LOC102654757
gene10816	gene10816	gene8957	gene11018				gene11846				gene10816	726867	LOC726867	ATP-binding cassette sub-family B member 6, mitochondrial
gene3204	gene3204	gene6241	gene10333				gene6063				gene3204	725991	LOC725991	sodium/potassium-transporting ATPase subunit beta-2
gene1229	gene1229	gene5545	gene3104				gene8699				gene1229	412412	LOC412412	microfibrillar-associated protein 1 isoform X1
gene5981	gene5981	gene8493	gene9209				gene7342				gene5981	725261	LOC725261	carbonic anhydrase 6 isoform X1
gene3853	gene3853	gene9114	gene4615				gene2251				gene3853	412457	LOC412457	T-cell activation inhibitor, mitochondrial isoform X1
gene10960	gene10960	gene7273	gene2422				gene437				gene10960	408467	LOC408467	chloride channel protein 2 isoform X3
gene5771	gene5771	gene3317	gene6681				gene9028				gene5771	100577098	LOC100577098	enolase-phosphatase E1 isoform X1
gene4036	gene4036	gene12286	gene807				gene2839				gene4036	412443	LOC412443	regulator of microtubule dynamics protein 1 isoform X1
gene7566	gene7566	gene3120	gene8639				gene6503				gene7566	724616	LOC724616	neprilysin-1 isoform X1
gene3179	gene3179	gene6487	gene11156				gene328				gene3179	551971	Ube2g1	ubiquitin-conjugating enzyme E2 G1
gene5235	gene5235	gene1761	gene2989				gene5693				gene5235	102655014	LOC102655014
gene11460	gene11460	gene6836	gene331				gene2319				gene11460	726331	LOC726331	alpha-2A adrenergic receptor
gene7241	gene7241	gene10907	gene5482				gene10916				gene7241	412011	LOC412011	muscarinic acetylcholine receptor gar-2
gene642	gene642	gene6538	gene10806				gene9601				gene642	409755	LOC409755	beta-parvin
gene1103	gene1103	gene7754	gene5454				gene575				gene1103	551280	LOC551280	uncharacterized protein LOC551280 isoform X1
gene3483	gene3483	gene10511	gene5953				gene2763				gene3483	412416	LOC412416	protein angel isoform X1
gene8515	gene8515	gene4962	gene4425				gene1555				gene8515	411380	LOC411380	60S ribosomal protein L30
gene6378	gene6378	gene1526	gene9990				gene10190				gene6378	100576300	LOC100576300	uncharacterized protein LOC100576300
gene8285	gene8285	gene10878	gene670				gene2111				gene8285	410172	LOC410172	translocating chain-associated membrane protein 1-like 1
gene9648	gene9648	gene2757	gene7478				gene11343				gene9648	551549	LOC551549	transmembrane 9 superfamily member 3
gene5693	gene5693	gene8062	gene870				gene6675				gene5693	412994	LOC412994	octopamine receptor beta-3R isoform X2
gene6054	gene6054	gene8969	gene8865				gene6989				gene6054	412810	LOC412810	V-type proton ATPase 116 kDa subunit a isoform X1
gene9244	gene9244	gene71	gene2782				gene11770				gene9244	409919	LOC409919	excitatory amino acid transporter 1 isoform X3
gene393	gene393	gene9759	gene3922				gene228				gene393	725920	LOC725920	vitellogenin receptor
gene4845	gene4845	gene4773	gene10153				gene9641				gene4845	678511	Qbp-1	queen brain-selective protein-1 isoform X1
gene5807	gene5807	gene2072	gene8080				gene11318				gene5807	408942	LOC408942	receptor expression-enhancing protein 2 isoform X4
gene5984	gene5984	gene7970	gene578				gene5973				gene5984	100576960	LOC100576960	DNA polymerase subunit gamma-2, mitochondrial
gene1230	gene1230	gene4470	gene7925				gene10025				gene1230	726766	LOC726766	endoribonuclease Dicer
gene6042	gene6042	gene11252	gene1832				gene580				gene6042	725668	LOC725668	phospholipase B1, membrane-associated-like
gene1031	gene1031	gene4497	gene7133				gene11473				gene1031	409690	LOC409690	uncharacterized protein LOC409690
gene8448	gene8448	gene999	gene3797				gene4697				gene8448	408273	Y-y	yellow-y precursor
gene10630	gene10630	gene4257	gene6601				gene3975				gene10630	100576591	LOC100576591	uncharacterized protein DDB_G0284459-like isoform X1
gene6364	gene6364	gene2253	gene3094				gene11460				gene6364	551866	LOC551866	NADH dehydrogenase
gene1067	gene1067	gene9000	gene5874				gene916				gene1067	113219125	LOC113219125
gene8853	gene8853	gene5744	gene8287				gene5469				gene8853	409136	LOC409136	inositol polyphosphate 5-phosphatase E isoform X1
gene2215	gene2215	gene2807	gene8248				gene5381				gene2215	408666	LOC408666	uncharacterized protein LOC408666
gene9870	gene9870	gene6216	gene5173				gene2226				gene9870	725157	LOC725157	uncharacterized protein LOC725157 isoform X1
gene6758	gene6758	gene9680	gene3248				gene12157				gene6758	409219	LOC409219	phospholipase A-2-activating protein
gene208	gene208	gene2506	gene8602				gene4892				gene208	107965033	LOC107965033
gene10114	gene10114	gene6926	gene11330				gene5487				gene10114	552678	LOC552678	enolase
gene7079	gene7079	gene6573	gene3615				gene7069				gene7079	727472	PGRP-S3	peptidoglycan-recognition protein SA precursor
gene2075	gene2075	gene11183	gene2604				gene1228				gene2075	410866	LOC410866	LIM domain only protein 3
gene7680	gene7680	gene10029	gene9809				gene5459				gene7680	408988	LOC408988	uncharacterized protein LOC408988 isoform X1
gene4599	gene4599	gene7922	gene343				gene3353				gene4599	100576683	LOC100576683	uncharacterized protein LOC100576683 isoform X3
gene8699	gene8699	gene1745	gene6848				gene989				gene8699	413543	LOC413543	sushi, von Willebrand factor type A, EGF and pentraxin domain-containing protein 1 isoform X1
gene4203	gene4203	gene4105	gene666				gene1331				gene4203	412382	LOC412382	excitatory amino acid transporter 3 isoform X1
gene11246	gene11246	gene3562	gene2874				gene1684				gene11246	551984	LOC551984	coiled-coil domain-containing protein R3HCC1L isoform X2
gene1898	gene1898	gene5621	gene10707				gene11657				gene1898	552075	LOC552075	saccharopine dehydrogenase-like oxidoreductase
gene10626	gene10626	gene3950	gene6161				gene6265				gene10626	724915	LOC724915	Usher syndrome type-1G protein homolog isoform X1
gene9945	gene9945	gene9190	gene3799				gene5650				gene9945	408388	LOC408388	tubulin alpha-1 chain
gene1938	gene1938	gene9892	gene3218				gene360				gene1938	100577938	LOC100577938	uncharacterized protein LOC100577938
gene10032	gene10032	gene6577	gene8486				gene6639				gene10032	726204	LOC726204	transcription factor cwo isoform X2
gene11164	gene11164	gene10900	gene5990				gene9347				gene11164	411467	LOC411467	RNA polymerase II-associated protein 3 isoform X1
gene6272	gene6272	gene6974	gene10263				gene9382				gene6272	409692	LOC409692	disintegrin and metalloproteinase domain-containing protein 10 isoform X1
gene11807	gene11807	gene9727	gene10006				gene7950				gene11807	100379261	LOC100379261	uncharacterized protein LOC100379261
gene11725	gene11725	gene1404	gene2263				gene8761				gene11725	406078	Tsf1	transferrin 1 precursor
gene6412	gene6412	gene2391	gene1136				gene7796				gene6412	727647	LOC727647	uncharacterized protein LOC727647
gene1028	gene1028	gene3835	gene9855				gene193				gene1028	410022	LOC410022	mitochondrial-processing peptidase subunit beta
gene10009	gene10009	gene7659	gene8038				gene9878				gene10009	410396	LOC410396	isocitrate dehydrogenase
gene5614	gene5614	gene802	gene6263				gene1067				gene5614	552272	LOC552272	40S ribosomal protein S23
gene10613	gene10613	gene7861	gene6503				gene8986				gene10613	409822	LOC409822	enhancer of split m7 protein
gene8153	gene8153	gene4360	gene823				gene492				gene8153	411854	LOC411854	heat shock factor protein isoform X4
gene7443	gene7443	gene6279	gene6048				gene8187				gene7443	552340	LOC552340	glypican-4 isoform X2
gene9985	gene9985	gene1800	gene8162				gene8672				gene9985	552712	LOC552712	6-phosphogluconate dehydrogenase, decarboxylating
gene5816	gene5816	gene3859	gene8495				gene225				gene5816	102656309	LOC102656309
gene3664	gene3664	gene4491	gene2522				gene1916				gene3664	100578168	LOC100578168	glycoprotein 3-alpha-L-fucosyltransferase A isoform X1
gene2402	gene2402	gene10330	gene3789				gene6935				gene2402	410805	LOC410805	open rectifier potassium channel protein 1 isoform X1
gene11105	gene11105	gene3578	gene660				gene10169				gene11105	727232	LOC727232	uncharacterized protein LOC727232 isoform X10
gene370	gene370	gene487	gene11355				gene3708				gene370	725384	Or2	odorant receptor 2 isoform X1
gene8570	gene8570	gene7443	gene4848				gene7087				gene8570	413054	LOC413054	myeloperoxidase, partial
gene9502	gene9502	gene8286	gene7818				gene3179				gene9502	406106	Pkc	protein kinase C
gene7996	gene7996	gene11701	gene5684				gene10460				gene7996	102653934	LOC102653934
gene676	gene676	gene8415	gene6935				gene3892				gene676	408594	LOC408594	triple functional domain protein isoform X3
gene2596	gene2596	gene1070	gene6105				gene1587				gene2596	408762	LOC408762	uncharacterized protein MAL13P1.304
gene3022	gene3022	gene11352	gene3345				gene4997				gene3022	412266	LOC412266	60S ribosomal protein L27
gene10533	gene10533	gene10840	gene9467				gene12015				gene10533	113219220	LOC113219220
gene550	gene550	gene10701	gene2175				gene1621				gene550	410732	LOC410732	3-phosphoinositide-dependent protein kinase 1 isoform X1
gene5792	gene5792	gene4251	gene3494				gene2833				gene5792	408952	LOC408952	oxysterol-binding protein 1 isoform X1
gene7937	gene7937	gene11932	gene12298				gene8367				gene7937	409056	LOC409056	sodium-dependent phosphate transporter 2
gene6672	gene6672	gene8464	gene2320				gene7680				gene6672	409273	LOC409273	midnolin-A isoform X1
gene3330	gene3330	gene7913	gene5485				gene8955				gene3330	413669	LOC413669	protein lap4 isoform X3
gene9848	gene9848	gene11412	gene10989				gene1202				gene9848	551857	LOC551857	sepiapterin reductase
gene10521	gene10521	gene7832	gene9386				gene1250				gene10521	410078	LOC410078	echinoderm microtubule-associated protein-like 2 isoform X5
gene3581	gene3581	gene4888	gene7647				gene1026				gene3581	100577798	LOC100577798	uncharacterized protein LOC100577798 isoform X5
gene6203	gene6203	gene5541	gene5868				gene5126				gene6203	550875	LOC550875	endothelial differentiation-related factor 1 homolog isoform X2
gene11979	gene11979	gene3837	gene5999				gene699				gene11979	724126	LOC724126	uncharacterized protein LOC724126
gene1205	gene1205	gene7291	gene7354				gene6857				gene1205	413575	LOC413575	facilitated trehalose transporter Tret1
gene10299	gene10299	gene11293	gene3879				gene102				gene10299	409963	LOC409963	6-phosphofructo-2-kinase/fructose-2,6-bisphosphatase isoform X1
gene4411	gene4411	gene4074	gene9528				gene11272				gene4411	725834	LOC725834	septin-7 isoform X7
gene2827	gene2827	gene588	gene10595				gene8853				gene2827	726633	LOC726633	trafficking protein particle complex subunit 11 isoform X1
gene7233	gene7233	gene4879	gene7804				gene2062				gene7233	726445	Gpdh	glycerol-3-phosphate dehydrogenase isoform X1
gene5301	gene5301	gene4753	gene4870				gene1575				gene5301	411154	LOC411154	eukaryotic translation initiation factor 4 gamma 2 isoform X1
gene2096	gene2096	gene11561	gene5899				gene1081				gene2096	100577530	LOC100577530	uncharacterized protein LOC100577530
gene7926	gene7926	gene10087	gene31				gene8515				gene7926	100578132	LOC100578132	glutamate--cysteine ligase catalytic subunit
gene438	gene438	gene10307	gene2798				gene6658				gene438	724585	LOC724585	uncharacterized protein LOC724585
gene4109	gene4109	gene2536	gene6791				gene5865				gene4109	412858	LOC412858	hemicentin-2
gene9871	gene9871	gene6376	gene10541				gene697				gene9871	552725	LOC552725	N-acetylglucosamine-1-phosphotransferase subunits alpha/beta isoform X1
gene9431	gene9431	gene10752	gene1677				gene5566				gene9431	413429	LOC413429	acid phosphatase type 7
gene3299	gene3299	gene6033	gene8168				gene1308				gene3299	413936	LOC413936	uncharacterized protein LOC413936 isoform X3
gene2720	gene2720	gene5405	gene8092				gene442				gene2720	552489	LOC552489	SEC14-like protein 2 isoform X2
gene1061	gene1061	gene5425	gene7642				gene1387				gene1061	409970	LOC409970	thrombospondin type-1 domain-containing protein 4
gene8247	gene8247	gene5940	gene9746				gene11854				gene8247	409499	LOC409499	UDP-glucose 4-epimerase
gene8761	gene8761	gene9553	gene5534				gene10501				gene8761	727510	LOC727510	lactosylceramide 4-alpha-galactosyltransferase isoform X1
gene3737	gene3737	gene9161	gene10697				gene8069				gene3737	408797	LOC408797	LOW QUALITY PROTEIN: nidogen-2
gene6379	gene6379	gene11209	gene228				gene1584				gene6379	551962	LOC551962	uncharacterized protein C6orf106 homolog
gene3702	gene3702	gene3908	gene1401				gene9746				gene3702	724481	LOC724481	uncharacterized protein LOC724481 isoform X1
gene7167	gene7167	gene12130	gene3240				gene11001				gene7167	100576369	LOC100576369	ets DNA-binding protein pokkuri isoform X2
gene8096	gene8096	gene2314	gene10463				gene3330				gene8096	410223	LOC410223	phosducin-like protein
gene6223	gene6223	gene10818	gene2076				gene3328				gene6223	408906	LOC408906	multiple C2 and transmembrane domain-containing protein isoform X5
gene4560	gene4560	gene1883	gene1253				gene9172				gene4560	725569	LOC725569	UDP-xylose and UDP-N-acetylglucosamine transporter
gene5621	gene5621	gene4177	gene9448				gene2994				gene5621	410066	GlnS	glutamine synthetase isoform X1
gene6149	gene6149	gene2763	gene9742				gene1420				gene6149	410067	LOC410067	uncharacterized protein LOC410067
gene11069	gene11069	gene10951	gene8528				gene151				gene11069	410555	LOC410555	insulin-like growth factor-binding protein complex acid labile subunit
gene6788	gene6788	gene926	gene11165				gene244				gene6788	408964	LOC408964	uncharacterized protein LOC408964 isoform X4
gene8835	gene8835	gene9244	gene8698				gene5524				gene8835	409178	LOC409178	ATP-dependent zinc metalloprotease YME1 homolog isoform X2
gene7755	gene7755	gene10148	gene6320				gene6697				gene7755	102654831	LOC102654831
gene5530	gene5530	gene8726	gene2729				gene10804				gene5530	552520	LOC552520	AP-3 complex subunit mu-1 isoform X1
gene488	gene488	gene2595	gene9446				gene6008				gene488	102656636	LOC102656636
gene993	gene993	gene11313	gene5872				gene7326				gene993	411982	LOC411982	E3 ubiquitin-protein ligase CBL-B isoform X1
gene7207	gene7207	gene11719	gene9978				gene7252				gene7207	412787	LOC412787	protein TAPT1 homolog isoform X1
gene8888	gene8888	gene330	gene531				gene227				gene8888	409512	LOC409512	neural/ectodermal development factor IMP-L2 isoform X2
gene3417	gene3417	gene9201	gene2990				gene11151				gene3417	724738	LOC724738	bis(5\\'-adenosyl)-triphosphatase enpp4 isoform X1
gene3642	gene3642	gene8629	gene1373				gene6593				gene3642	413117	LOC413117	proton-coupled amino acid transporter-like protein pathetic
gene4422	gene4422	gene4340	gene4690				gene4248				gene4422	100576667	LOC100576667	E3 ubiquitin-protein ligase synoviolin A isoform X2
gene6098	gene6098	gene11597	gene1154				gene10262				gene6098	409106	LOC409106	protein zyg-11 homolog B
gene469	gene469	gene2897	gene10742				gene3597				gene469	100577291	LOC100577291
gene5422	gene5422	gene1016	gene329				gene7623				gene5422	409707	LOC409707	zwei Ig domain protein zig-8 isoform X1
gene6389	gene6389	gene11789	gene2878				gene6378				gene6389	724191	RpL35	ribosomal protein L35
gene11358	gene11358	gene4460	gene8347				gene3573				gene11358	408543	LOC408543	RING finger protein 44 isoform X2
gene2216	gene2216	gene2956	gene565				gene1005				gene2216	100578654	LOC100578654	uncharacterized protein LOC100578654 isoform X2
gene3031	gene3031	gene3527	gene6433				gene8702				gene3031	551597	LOC551597	cysteine-rich venom protein
gene4558	gene4558	gene7713	gene2605				gene1209				gene4558	552679	LOC552679	cytochrome P450 4c3
gene7876	gene7876	gene699	gene10587				gene10724				gene7876	725046	LOC725046	uncharacterized protein LOC725046 isoform X3
gene8338	gene8338	gene5102	gene11409				gene238				gene8338	406120	RpLP1	60S acidic ribosomal protein P1
gene9199	gene9199	gene8860	gene5145				gene3154				gene9199	406151	mGlutR1	metabotropic glutamate receptor 1 isoform X1
gene2512	gene2512	gene9972	gene2173				gene11040				gene2512	412979	LOC412979	dual specificity protein phosphatase MPK-4
gene9504	gene9504	gene4380	gene11098				gene634				gene9504	410271	LOC410271	BMP-binding endothelial regulator protein
gene8227	gene8227	gene6199	gene10195				gene1585				gene8227	552015	LOC552015	putative ATPase N2B
gene9161	gene9161	gene6757	gene3073				gene6250				gene9161	552738	LOC552738	2-hydroxyacyl-CoA lyase 1-like
gene4082	gene4082	gene2938	gene5319				gene3438				gene4082	411507	LOC411507	cyclin-dependent kinase-like 4 isoform X1
gene2557	gene2557	gene6385	gene5863				gene12115				gene2557	408763	LOC408763	homeobox protein extradenticle isoform X6
gene2174	gene2174	gene6605	gene757				gene709				gene2174	726230	LOC726230	uncharacterized protein LOC726230 isoform X2
gene7400	gene7400	gene8977	gene6998				gene10374				gene7400	724137	NLG-5	neuroligin 5 isoform X1
gene2499	gene2499	gene2924	gene6509				gene10009				gene2499	409900	LOC409900	N6-adenosine-methyltransferase non-catalytic subunit
gene6657	gene6657	gene6584	gene2369				gene9754				gene6657	724933	LOC724933	xanthine dehydrogenase
gene12045	gene12045	gene1787	gene8694				gene1564				gene12045	551991	LOC551991	uncharacterized protein LOC551991 isoform X1
gene6696	gene6696	gene610	gene8514				gene3383				gene6696	409455	LOC409455	doublesex- and mab-3-related transcription factor A2
gene683	gene683	gene5694	gene9031				gene8325				gene683	413024	LOC413024	carboxyl-terminal PDZ ligand of neuronal nitric oxide synthase protein-like isoform X1
gene739	gene739	gene6581	gene7218								gene739	724620	LOC724620	inner nuclear membrane protein Man1
gene5751	gene5751	gene68	gene6135								gene5751	413248	LOC413248	uncharacterized protein LOC413248 isoform X1
gene4140	gene4140	gene1805	gene9333								gene4140	100577231	LOC100577231	uncharacterized protein LOC100577231
gene8293	gene8293	gene9898	gene93								gene8293	107965037	LOC107965037	probable serine/threonine-protein kinase DDB_G0278845 isoform X1
gene5315	gene5315	gene8851	gene12046								gene5315	727202	LOC727202	carbohydrate sulfotransferase 11
gene2022	gene2022	gene4504	gene7329								gene2022	413186	LOC413186	mitochondrial pyruvate carrier 3
gene3092	gene3092	gene220	gene9697								gene3092	102654960	LOC102654960
gene7282	gene7282	gene11989	gene7013								gene7282	113219007	LOC113219007	zinc finger protein 524-like
gene3950	gene3950	gene4677	gene10711								gene3950	551628	LOC551628	protein borderless isoform X3
gene11590	gene11590	gene4941	gene3394								gene11590	408525	LOC408525	neuronal acetylcholine receptor subunit alpha-10
gene7847	gene7847	gene10427	gene7264								gene7847	724285	LOC724285	choline transporter-like protein 1 isoform X2
gene662	gene662	gene6501	gene5748								gene662	552502	LOC552502	protein KIAA0100 isoform X2
gene4171	gene4171	gene6157	gene10180								gene4171	552195	LOC552195	uncharacterized protein LOC552195 isoform X3
gene10304	gene10304	gene6155	gene4685								gene10304	413549	LOC413549	chondroitin sulfate synthase 1
gene10907	gene10907	gene6335	gene4165								gene10907	410517	LOC410517	extracellular serine/threonine protein CG31145
gene2148	gene2148	gene10161	gene8814								gene2148	408670	LOC408670	Down syndrome cell adhesion molecule-like protein Dscam2 isoform X2
gene4144	gene4144	gene1555	gene8617								gene4144	413020	LOC413020	two pore potassium channel protein sup-9
gene4130	gene4130	gene10297	gene12067								gene4130	100578822	LOC100578822	protein IWS1 homolog
gene8731	gene8731	gene12133	gene6989								gene8731	551391	LOC551391	U1 small nuclear ribonucleoprotein 70 kDa isoform X1
gene2101	gene2101	gene11040	gene8445								gene2101	102653599	LOC102653599
gene11050	gene11050	gene961	gene1132								gene11050	726979	LOC726979	uncharacterized protein LOC726979 isoform X1
gene10987	gene10987	gene2398	gene9398								gene10987	100578776	LOC100578776	uncharacterized protein LOC100578776 isoform X2
gene6498	gene6498	gene8621	gene229								gene6498	100578572	LOC100578572
gene8211	gene8211	gene6502	gene7646								gene8211	408293	LOC408293	exostosin-1 isoform X1
gene12066	gene12066	gene5857	gene81								gene12066	408558	LOC408558	tektin-4
gene356	gene356	gene5984	gene3601								gene356	551556	LOC551556	probable serine/threonine-protein kinase DDB_G0283337
gene977	gene977	gene4464	gene7623								gene977	413650	LOC413650	nuclear RNA export factor 1
gene1070	gene1070	gene2256	gene11479								gene1070	551558	LOC551558	FK506-binding protein 5 isoform X3
gene9318	gene9318	gene9686	gene582								gene9318	727221	LOC727221	vacuolar protein sorting-associated protein 13C isoform X1
gene11660	gene11660	gene2598	gene6472								gene11660	413931	LOC413931	dynactin subunit 1 isoform X2
gene6807	gene6807	gene3736	gene8195								gene6807	551904	LOC551904	glycerol-3-phosphate dehydrogenase, mitochondrial isoform X1
gene9972	gene9972	gene4793	gene5660								gene9972	552397	LOC552397	putative uncharacterized protein DDB_G0271982 isoform X2
gene6823	gene6823	gene11841	gene3961								gene6823	100577306	LOC100577306
gene7302	gene7302	gene8359	gene1394								gene7302	727552	LOC727552	Y+L amino acid transporter 2
gene6406	gene6406	gene167	gene6313								gene6406	551301	LOC551301	solute carrier family 25 member 40
gene8303	gene8303	gene2215	gene7963								gene8303	552275	LOC552275	AF4/FMR2 family member 4 isoform X1
gene11315	gene11315	gene311	gene7899								gene11315	413515	LOC413515	zinc finger protein 37 isoform X2
gene11709	gene11709	gene4939	gene5310								gene11709	410585	LOC410585	DE-cadherin isoform X1
gene10848	gene10848	gene586	gene7840								gene10848	552517	LOC552517	60S ribosomal protein L13
gene1220	gene1220	gene8593	gene5682								gene1220	100576242	LOC100576242	cilia- and flagella-associated protein 91 isoform X1
gene4189	gene4189	gene5302	gene4356								gene4189	408827	LOC408827	carbonic anhydrase 1
gene6766	gene6766	gene8531	gene5451								gene6766	409243	LOC409243	centromere-associated protein E isoform X1
gene4714	gene4714	gene9185	gene2778								gene4714	100578678	LOC100578678
gene10877	gene10877	gene1216	gene9698								gene10877	100577065	LOC100577065	lymphocyte expansion molecule-like
gene1371	gene1371	gene1125	gene2558								gene1371	725284	LOC725284	chitin synthase chs-2
gene4244	gene4244	gene4496	gene9067								gene4244	409882	LOC409882	TLD domain-containing protein 2 isoform X1
gene7676	gene7676	gene2098	gene2781								gene7676	100576504	LOC100576504	uncharacterized protein LOC100576504 isoform X1
gene11142	gene11142	gene10232	gene6287								gene11142	102653748	LOC102653748	growth/differentiation factor 8
gene10316	gene10316	gene9325	gene5933								gene10316	102655054	LOC102655054	protein tyrosine phosphatase domain-containing protein 1
gene6265	gene6265	gene2570	gene5650								gene6265	551182	LOC551182	phosphatidylinositol 4-kinase alpha
gene1219	gene1219	gene4574	gene3185								gene1219	726647	LOC726647	uncharacterized protein LOC726647
gene2646	gene2646	gene429	gene6260								gene2646	411492	LOC411492	ATP-dependent RNA helicase DHX36
gene10641	gene10641	gene11653	gene9202								gene10641	410479	LOC410479	zwei Ig domain protein zig-8
gene2314	gene2314	gene6826	gene3898								gene2314	552037	LOC552037	POC1 centriolar protein homolog A isoform X1
gene11318	gene11318	gene7312	gene6603								gene11318	552258	LOC552258	hippocampus abundant transcript 1 protein isoform X2
gene5694	gene5694	gene5069	gene6348								gene5694	412896	LOC412896	octopamine receptor beta-2R isoform X3
gene3992	gene3992	gene8459	gene3444								gene3992	102653815	LOC102653815	cytochrome b reductase 1 isoform X1
gene7665	gene7665	gene5077	gene7551								gene7665	408989	LOC408989	putative glycerol kinase 5
gene5121	gene5121	gene8378	gene2905								gene5121	409292	LOC409292	probable isocitrate dehydrogenase
gene6593	gene6593	gene3059	gene4374								gene6593	411250	LOC411250	DEAD-box ATP-dependent RNA helicase 20
gene8523	gene8523	gene8261	gene6085								gene8523	410289	LOC410289	paraplegin
gene6332	gene6332	gene5008	gene4309								gene6332	412650	LOC412650	tetratricopeptide repeat protein 21B
gene5077	gene5077	gene534	gene10922								gene5077	409897	LOC409897	probable multidrug resistance-associated protein lethal(2)03659 isoform X1
gene1639	gene1639	gene8961	gene10510								gene1639	726171	LOC726171	60S ribosomal protein L11
gene10313	gene10313	gene4235	gene3959								gene10313	725354	LOC725354	uncharacterized protein LOC725354 isoform X1
gene2879	gene2879	gene10514	gene11969								gene2879	102656050	LOC102656050
gene5806	gene5806	gene8182	gene619								gene5806	413065	LOC413065	transmembrane protein 164 isoform X2
gene4738	gene4738	gene6334	gene8428								gene4738	551176	LOC551176	actin, clone 205
gene6577	gene6577	gene8412	gene2915								gene6577	409633	LOC409633	ras-related and estrogen-regulated growth inhibitor
gene2165	gene2165	gene5258	gene1261								gene2165	725957	LOC725957	Krueppel homolog 2
gene11270	gene11270	gene11188	gene6723								gene11270	550932	Argk	arginine kinase isoform X1
gene10318	gene10318	gene11891	gene8021								gene10318	408423	Foxp	foxP protein isoform X5
gene11297	gene11297	gene3556	gene1210								gene11297	411897	LOC411897	phosphoglucomutase isoform X1
gene11789	gene11789	gene9977	gene8125								gene11789	551593	LOC551593	sphingosine-1-phosphate lyase
gene9450	gene9450	gene4534	gene1407								gene9450	409373	LOC409373	transmembrane protein 184B isoform X1
gene6288	gene6288	gene7161	gene9879								gene6288	102655507	LOC102655507
gene4400	gene4400	gene6934	gene3458								gene4400	552382	LOC552382	alpha-mannosidase 2 isoform X1
gene998	gene998	gene9848	gene7487								gene998	100577833	LOC100577833	histone H1.2
gene9949	gene9949	gene4698	gene4834								gene9949	100578613	LOC100578613	uncharacterized protein LOC100578613
gene6489	gene6489	gene2386	gene1300								gene6489	725331	LOC725331	protein hairy isoform X1
gene12244	gene12244	gene2822	gene3560								gene12244	551685	LOC551685	uncharacterized protein LOC551685 isoform X2
gene11628	gene11628	gene3352	gene3307								gene11628	410604	LOC410604	protein phosphatase PP2A 55 kDa regulatory subunit isoform X1
gene9951	gene9951	gene5598	gene6585								gene9951	726758	LOC726758	uncharacterized protein LOC726758
gene4418	gene4418	gene9363	gene1537								gene4418	100576794	LOC100576794	pre-mRNA-splicing factor 38
gene10165	gene10165	gene10262	gene2503								gene10165	102656087	LOC102656087
gene790	gene790	gene11417	gene8070								gene790	100578657	LOC100578657
gene10937	gene10937	gene5384	gene7046								gene10937	107965486	LOC107965486
gene9787	gene9787	gene2607	gene7645								gene9787	100576956	LOC100576956	metalloproteinase inhibitor 3
gene3508	gene3508	gene5620	gene2980								gene3508	725992	LOC725992	uncharacterized protein LOC725992 isoform X1
gene6805	gene6805	gene10247	gene2226								gene6805	726643	LOC726643	formin-like protein 14
gene10129	gene10129	gene5514	gene2008								gene10129	100577515	LOC100577515	uncharacterized protein LOC100577515
gene2822	gene2822	gene1235	gene8618								gene2822	726529	LOC726529	ankyrin repeat domain-containing protein 29
gene6674	gene6674	gene9753	gene5214								gene6674	100577746	LOC100577746	polyadenylate-binding protein-interacting protein 1 isoform X1
gene3161	gene3161	gene5600	gene6598								gene3161	408729	LOC408729	uncharacterized protein LOC408729
gene9659	gene9659	gene9204	gene2865								gene9659	727106	LOC727106	heterogeneous nuclear ribonucleoprotein H
gene1407	gene1407	gene4100	gene8897								gene1407	726178	LOC726178	hrp65 protein isoform X2
gene2335	gene2335	gene2857	gene2911								gene2335	725091	LOC725091	lachesin isoform X1
gene5173	gene5173	gene2355	gene2163								gene5173	413074	LOC413074	dosage compensation regulator isoform X1
gene5675	gene5675	gene12197	gene2521								gene5675	100576110	LOC100576110	zinc finger protein GLI4 isoform X4
gene1585	gene1585	gene1464	gene7503								gene1585	724665	LOC724665	protein SET isoform X1
gene170	gene170	gene1042	gene1200								gene170	102655778	LOC102655778	translation factor GUF1 homolog, mitochondrial
gene8007	gene8007	gene5965	gene10838								gene8007	100576193	LOC100576193	keratinocyte proline-rich protein isoform X1
gene12057	gene12057	gene10193	gene5766								gene12057	551165	LOC551165	innexin inx3
gene11806	gene11806	gene11267	gene973								gene11806	551328	LOC551328	E3 ubiquitin-protein ligase RNF19A isoform X1
gene9741	gene9741	gene10935	gene2313								gene9741	412731	LOC412731	type II inositol 1,4,5-trisphosphate 5-phosphatase isoform X1
gene279	gene279	gene9112	gene10345								gene279	550789	LOC550789	selenocysteine Se-methyltransferase
gene4504	gene4504	gene11213	gene12313								gene4504	411110	LOC411110	solute carrier family 52, riboflavin transporter, member 3-A isoform X2
gene9077	gene9077	gene993	gene538								gene9077	410337	LOC410337	venom dipeptidyl peptidase 4 precursor
gene12145	gene12145	gene4560	gene895								gene12145	102655928	LOC102655928	uncharacterized protein LOC102655928 isoform X1
gene4196	gene4196	gene8252	gene5597								gene4196	107964419	LOC107964419	uncharacterized protein LOC107964419 isoform X2
gene11146	gene11146	gene5362	gene603								gene11146	727312	LOC727312	Golgi-specific brefeldin A-resistance guanine nucleotide exchange factor 1
gene7163	gene7163	gene743	gene8211								gene7163	726958	LOC726958	tumor necrosis factor receptor superfamily member wengen isoform X1
gene989	gene989	gene7914	gene5956								gene989	412196	LOC412196	uncharacterized protein LOC412196
gene7446	gene7446	gene1304	gene8539								gene7446	409085	LOC409085	guanine nucleotide exchange factor for Rab-3A
gene4762	gene4762	gene7302	gene1250								gene4762	409207	LOC409207	synaptic vesicle membrane protein VAT-1 homolog-like isoform X1
gene4024	gene4024	gene1420	gene4204								gene4024	413809	LOC413809	mitogen-activated protein kinase kinase kinase 7 isoform X1
gene4905	gene4905	gene10477	gene11743								gene4905	113218561	LOC113218561	cytoplasmic dynein 2 heavy chain 1-like
gene1994	gene1994	gene7475	gene4449								gene1994	102654653	LOC102654653	dihydropyrimidinase isoform X2
gene7628	gene7628	gene10264	gene2015								gene7628	100578093	LOC100578093	myeloid zinc finger 1
gene1159	gene1159	gene9029	gene7002								gene1159	413895	LOC413895	bone morphogenetic protein receptor type-2
gene10224	gene10224	gene10311	gene10346								gene10224	725426	LOC725426	uncharacterized protein LOC725426 isoform X1
gene11015	gene11015	gene11288	gene2023								gene11015	550799	LOC550799	DAZ-associated protein 2 isoform X2
gene10199	gene10199	gene9167	gene10233								gene10199	413880	LOC413880	peroxisomal targeting signal 1 receptor
gene9641	gene9641	gene5105	gene6402								gene9641	409892	LOC409892	dnaJ homolog subfamily C member 9 isoform X2
gene11010	gene11010	gene4705	gene4899								gene11010	409945	LOC409945	aspartate--tRNA ligase, cytoplasmic
gene938	gene938	gene9985	gene1044								gene938	724761	LOC724761	uncharacterized protein LOC724761
gene6800	gene6800	gene3698	gene892								gene6800	552055	LOC552055	nardilysin isoform X1
gene4291	gene4291	gene11297	gene5769								gene4291	409334	LOC409334	beta-mannosidase
gene12222	gene12222	gene10155	gene8706								gene12222	408561	LOC408561	proteoglycan 4 isoform X1
gene1492	gene1492	gene7280	gene11908								gene1492	412354	LOC412354	uncharacterized protein LOC412354 isoform X1
gene102	gene102	gene7167	gene3980								gene102	409930	LOC409930	putative ATP synthase subunit f, mitochondrial
gene10783	gene10783	gene10775	gene11419								gene10783	412623	LOC412623	transmembrane protein 94 isoform X1
gene7952	gene7952	gene3353	gene7327								gene7952	102656841	LOC102656841	WD repeat-containing protein WRAP73 isoform X2
gene6683	gene6683	gene7842	gene6022								gene6683	100578949	LOC100578949
gene391	gene391	gene11971	gene9858								gene391	552294	LOC552294	far upstream element-binding protein 3
gene5818	gene5818	gene6406	gene8320								gene5818	102656548	LOC102656548	nucleoside diphosphate kinase homolog 5 isoform X3
gene445	gene445	gene10719	gene10683								gene445	409527	LOC409527	TBC domain-containing protein kinase-like protein
gene5923	gene5923	gene11482	gene4996								gene5923	726401	LOC726401	ras-specific guanine nucleotide-releasing factor 2 isoform X1
gene3303	gene3303	gene10228	gene12052								gene3303	552451	LOC552451	transmembrane and ubiquitin-like domain-containing protein 1
gene9730	gene9730	gene9040	gene8066								gene9730	102653810	LOC102653810	odorant receptor 22c isoform X1
gene318	gene318	gene7308	gene2312								gene318	410043	LOC410043	ornithine decarboxylase
gene1123	gene1123	gene9825	gene4252								gene1123	725458	LOC725458	hydroxylysine kinase
gene8305	gene8305	gene791	gene10433								gene8305	412198	LOC412198	UDP-glucose:glycoprotein glucosyltransferase isoform X1
gene11782	gene11782	gene9587	gene5341								gene11782	724493	LOC724493	uncharacterized protein LOC724493 isoform X1
gene2923	gene2923	gene2994	gene9767								gene2923	413404	LOC413404	ribosome biogenesis protein WDR12 homolog isoform X1
gene8962	gene8962	gene1180	gene2069								gene8962	725195	tra2	transformer-2 sex-determining protein isoform X1
gene6367	gene6367	gene1249	gene2745								gene6367	410107	LOC410107	broad-complex core protein isoforms 1/2/3/4/5 isoform X2
gene623	gene623	gene4536	gene9164								gene623	113219191	LOC113219191
gene4534	gene4534	gene9910	gene3351								gene4534	725511	LOC725511	protein Wnt-11b
gene2318	gene2318	gene8413	gene9498								gene2318	725070	LOC725070	DNA fragmentation factor subunit alpha
gene2251	gene2251	gene9287	gene6								gene2251	408676	LOC408676	CREB-regulated transcription coactivator 1 isoform X1
gene9055	gene9055	gene3992	gene11203								gene9055	100577801	LOC100577801	zinc finger protein ush isoform X1
gene2325	gene2325	gene8283	gene9224								gene2325	408660	LOC408660	uncharacterized protein LOC408660 isoform X2
gene7453	gene7453	gene103	gene6016								gene7453	113218539	LOC113218539	galectin-8-like isoform X1
gene11366	gene11366	gene7897	gene4146								gene11366	726509	LOC726509	protein FRA10AC1
gene2429	gene2429	gene7250	gene1992								gene2429	552649	LOC552649	elongation factor 1-beta\\'
gene1724	gene1724	gene6489	gene5393								gene1724	408716	LOC408716	histone-lysine N-methyltransferase trithorax isoform X2
gene11498	gene11498	gene387	gene10452								gene11498	724466	LOC724466	uncharacterized protein LOC724466 isoform X2
gene9992	gene9992	gene11893	gene2518								gene9992	408392	LOC408392	glycine--tRNA ligase
gene3270	gene3270	gene5134	gene7174								gene3270	412540	LOC412540	carcinine transporter
gene9089	gene9089	gene1877	gene7696								gene9089	408363	Ac3	adenylate cyclase 3
gene3473	gene3473	gene6261	gene6057								gene3473	727528	LOC727528	zinc finger BED domain-containing protein 1
gene8861	gene8861	gene7650	gene4711								gene8861	412247	LOC412247	rRNA methyltransferase 2, mitochondrial
gene5182	gene5182	gene5440	gene4042								gene5182	408886	LOC408886	transmembrane 7 superfamily member 3
gene4207	gene4207	gene11115	gene542								gene4207	100188940	LOC100188940	dolichyl-diphosphooligosaccharide--protein glycosyltransferase subunit 4 isoform X2
gene363	gene363	gene5400	gene10140								gene363	100576547	LOC100576547	glucose dehydrogenase
gene1250	gene1250	gene10974	gene6339								gene1250	551207	LOC551207	RNA polymerase II subunit A C-terminal domain phosphatase
gene9930	gene9930	gene2440	gene2091								gene9930	551738	LOC551738	F-box/LRR-repeat protein 4 isoform X1
gene10799	gene10799	gene8732	gene4708								gene10799	413069	LOC413069	H(+)/Cl(-) exchange transporter 7
gene3142	gene3142	gene9904	gene739								gene3142	724166	LOC724166	intraflagellar transport protein 20 homolog isoform X1
gene7441	gene7441	gene580	gene2979								gene7441	113218989	LOC113218989
gene1745	gene1745	gene8454	gene8170								gene1745	408715	LOC408715	lachesin isoform X1
gene7561	gene7561	gene945	gene4853								gene7561	411321	NLG-4	neuroligin 4 isoform X1
gene5048	gene5048	gene8980	gene5122								gene5048	411355	LOC411355	von Willebrand factor A domain-containing protein 8
gene6117	gene6117	gene4616	gene1709								gene6117	411534	LOC411534	circadian locomoter output cycles protein kaput isoform X2
gene4612	gene4612	gene11344	gene8134								gene4612	724926	LOC724926	DNA polymerase alpha subunit B isoform X1
gene4084	gene4084	gene1105	gene10927								gene4084	724891	LOC724891	DNA polymerase epsilon subunit 2 isoform X1
gene4750	gene4750	gene6879	gene3906								gene4750	100578835	LOC100578835
gene6512	gene6512	gene10299	gene10892								gene6512	726013	LOC726013	40S ribosomal protein S20
gene6594	gene6594	gene5407	gene12207								gene6594	100577408	LOC100577408	leukocyte elastase inhibitor
gene4085	gene4085	gene4431	gene818								gene4085	413929	LOC413929	egl nine homolog 1 isoform X1
gene7330	gene7330	gene2274	gene2125								gene7330	409515	LOC409515	long-chain-fatty-acid--CoA ligase 4 isoform X1
gene9408	gene9408	gene891	gene10099								gene9408	412273	LOC412273	probable chitinase 10 isoform X1
gene9324	gene9324	gene2022	gene1418								gene9324	725781	LOC725781	syndetin
gene8439	gene8439	gene8591	gene3975								gene8439	100576130	LOC100576130	diuretic hormone 44
gene8166	gene8166	gene11357	gene1780								gene8166	412914	LOC412914	uncharacterized protein LOC412914 isoform X1
gene8152	gene8152	gene3354	gene5277								gene8152	725886	LOC725886	F-box/LRR-repeat protein 2
gene6002	gene6002	gene9016	gene7199								gene6002	102655814	LOC102655814	ras-related and estrogen-regulated growth inhibitor isoform X1
gene283	gene283	gene6636	gene8541								gene283	408616	LOC408616	transcriptional enhancer factor TEF-1 isoform X5
gene3865	gene3865	gene5879	gene11308								gene3865	413423	LOC413423	hemicentin-1 isoform X3
gene9252	gene9252	gene2813	gene3671								gene9252	411457	LOC411457	galactosylgalactosylxylosylprotein 3-beta-glucuronosyltransferase P isoform X1
gene10455	gene10455	gene5914	gene7463								gene10455	724728	LOC724728	NF-kappa-B essential modulator
gene2433	gene2433	gene5594	gene8116								gene2433	552175	LOC552175	mitochondrial-processing peptidase subunit alpha
gene7764	gene7764	gene8366	gene6887								gene7764	412289	LOC412289	cytosolic Fe-S cluster assembly factor NUBP1 homolog isoform X2
gene8359	gene8359	gene3314	gene8117								gene8359	100577138	LOC100577138	dual 3\\',5\\'-cyclic-AMP and -GMP phosphodiesterase 11 isoform X2
gene1854	gene1854	gene6898	gene3938								gene1854	100577268	LOC100577268	uncharacterized protein LOC100577268 isoform X1
gene9601	gene9601	gene10236	gene10389								gene9601	410148	LOC410148	carboxypeptidase Q
gene8076	gene8076	gene418	gene9970								gene8076	410229	LOC410229	toll-like receptor 6
gene10992	gene10992	gene6098	gene4473								gene10992	410535	LOC410535	protein lozenge isoform X6
gene2362	gene2362	gene8096	gene950								gene2362	725828	LOC725828	uncharacterized protein LOC725828 isoform X1
gene10399	gene10399	gene11270	gene1117								gene10399	102656830	LOC102656830	uncharacterized protein LOC102656830
gene4473	gene4473	gene9371	gene2845								gene4473	408839	LOC408839	uncharacterized protein LOC408839 isoform X6
gene11267	gene11267	gene5581	gene9496								gene11267	410151	LOC410151	retinal homeobox protein Rx2
gene2	gene2	gene5519	gene4426								gene2	726347	LOC726347	uncharacterized protein LOC726347
gene9086	gene9086	gene10893	gene4467								gene9086	727007	LOC727007	alpha-tocopherol transfer protein isoform X1
gene3578	gene3578	gene8227	gene7651								gene3578	100578609	LOC100578609	uncharacterized protein LOC100578609
gene5006	gene5006	gene3691	gene2978								gene5006	102653731	LOC102653731
gene4312	gene4312	gene3480	gene2867								gene4312	409382	LOC409382	E3 ubiquitin-protein ligase TRIP12 isoform X2
gene10227	gene10227	gene9072	gene9651								gene10227	408405	LOC408405	uncharacterized protein LOC408405 isoform X2
gene7693	gene7693	gene6766	gene3156								gene7693	552524	LOC552524	uncharacterized protein LOC552524
gene3562	gene3562	gene7185	gene4606								gene3562	411036	LOC411036	two pore potassium channel protein sup-9
gene3908	gene3908	gene4485	gene8273								gene3908	411677	LOC411677	mitochondrial pyruvate carrier 1
gene7469	gene7469	gene5713	gene11583								gene7469	552421	LOC552421	uncharacterized protein LOC552421 isoform X1
gene10264	gene10264	gene4131	gene5227								gene10264	726472	LOC726472	prohormone-3
gene4204	gene4204	gene5456	gene2923								gene4204	100579049	LOC100579049	cactin
gene9745	gene9745	gene3626	gene227								gene9745	406119	Cryl1	lambda crystallin-like protein
gene10515	gene10515	gene396	gene2950								gene10515	409736	LOC409736	probable methylmalonate-semialdehyde dehydrogenase
gene9835	gene9835	gene2524	gene4754								gene9835	412157	LOC412157	HEAT repeat-containing protein 5B isoform X3
gene10631	gene10631	gene4537	gene2614								gene10631	550958	LOC550958	uncharacterized protein LOC550958
gene9638	gene9638	gene7904	gene9329								gene9638	100576840	LOC100576840	uncharacterized protein LOC100576840
gene7647	gene7647	gene5530	gene1297								gene7647	409232	LOC409232	uncharacterized protein LOC409232
gene11831	gene11831	gene10359	gene5096								gene11831	410573	LOC410573	nephrin isoform X3
gene10306	gene10306	gene9652	gene4248								gene10306	100576924	LOC100576924	ankyrin repeat and death domain-containing protein 1A isoform X2
gene8811	gene8811	gene8010	gene2557								gene8811	551635	LOC551635	uncharacterized protein LOC551635 precursor
gene3814	gene3814	gene1858	gene3574								gene3814	409789	LOC409789	uncharacterized peptidase C1-like protein F26E4.3 isoform X1
gene1438	gene1438	gene10724	gene1732								gene1438	552274	LOC552274	protein FAM122A
gene10008	gene10008	gene4289	gene1391								gene10008	410395	LOC410395	chromobox protein homolog 1
gene3289	gene3289	gene269	gene9541								gene3289	551746	LOC551746	transcriptional activator cubitus interruptus isoform X1
gene3136	gene3136	gene5354	gene264								gene3136	551235	LOC551235	ATP-binding cassette sub-family E member 1
gene8319	gene8319	gene4777	gene6608								gene8319	552360	LOC552360	glycosylphosphatidylinositol anchor attachment 1 protein
gene11723	gene11723	gene7672	gene6905								gene11723	408510	LOC408510	uncharacterized protein LOC408510
gene2211	gene2211	gene2437	gene9869								gene2211	410819	LOC410819	proton channel OtopLc isoform X1
gene10813	gene10813	gene5357	gene5240								gene10813	412320	LOC412320	solute carrier family 35 member F6
gene2440	gene2440	gene9945	gene8490								gene2440	551966	LOC551966	multifunctional protein ADE2
gene800	gene800	gene10239	gene5118								gene800	409401	LOC409401	cyclic AMP-responsive element-binding protein 1 isoform X1
gene5633	gene5633	gene7123	gene9830								gene5633	409358	LOC409358	intraflagellar transport protein 74 homolog
gene1064	gene1064	gene4918	gene6411								gene1064	413558	LOC413558	photoreceptor-specific nuclear receptor
gene3634	gene3634	gene3877	gene2193								gene3634	408805	LOC408805	progestin and adipoQ receptor family member 3
gene11253	gene11253	gene1425	gene3670								gene11253	727223	LOC727223	uncharacterized protein LOC727223 isoform X2
gene3656	gene3656	gene57	gene1157								gene3656	725701	LOC725701	sialin-like isoform X2
gene9858	gene9858	gene8451	gene9418								gene9858	724727	LOC724727	homeobox protein PKNOX2 isoform X2
gene8144	gene8144	gene11539	gene11035								gene8144	552639	LOC552639	acylphosphatase-1
gene5463	gene5463	gene3284	gene2895								gene5463	409972	LOC409972	uncharacterized protein LOC409972
gene9134	gene9134	gene3329	gene685								gene9134	551735	LOC551735	autism susceptibility gene 2 protein isoform X1
gene4399	gene4399	gene1230	gene198								gene4399	725550	LOC725550	proteasome activator complex subunit 4A
gene9661	gene9661	gene267	gene4697								gene9661	552642	LOC552642	DNA replication licensing factor Mcm3
gene7761	gene7761	gene1849	gene3715								gene7761	412885	LOC412885	protein N-terminal asparagine amidohydrolase
gene10401	gene10401	gene2199	gene9701								gene10401	100187599	LOC100187599	uncharacterized protein LOC100187599 isoform X1
gene7536	gene7536	gene249	gene9049								gene7536	102653763	LOC102653763	LOW QUALITY PROTEIN: adenylate cyclase type 10-like
gene5221	gene5221	gene12132	gene10993								gene5221	411166	Kr	protein krueppel isoform X1
gene1677	gene1677	gene11619	gene11484								gene1677	551255	LOC551255	mitochondrial fission 1 protein
gene9287	gene9287	gene6089	gene7008								gene9287	551501	LOC551501	fringe glycosyltransferase
gene4989	gene4989	gene2271	gene9659								gene4989	552677	LOC552677	protein polybromo-1 isoform X2
gene9481	gene9481	gene11278	gene2414								gene9481	100578388	LOC100578388	uncharacterized protein LOC100578388 isoform X2
gene10447	gene10447	gene10913	gene1465								gene10447	550732	LOC550732	trichohyalin isoform X1
gene4986	gene4986	gene238	gene8795								gene4986	412522	LOC412522	pyruvate dehydrogenase E1 component subunit beta, mitochondrial isoform X1
gene10956	gene10956	gene11631	gene7989								gene10956	725184	LOC725184	gamma-aminobutyric acid receptor-associated protein
gene916	gene916	gene9262	gene4801								gene916	412191	LOC412191	protein diaphanous
gene4188	gene4188	gene4890	gene11690								gene4188	102656628	LOC102656628
gene3944	gene3944	gene277	gene3658								gene3944	113218723	LOC113218723	fibrous sheath CABYR-binding protein-like
gene610	gene610	gene952	gene3606								gene610	725189	LOC725189	protein bric-a-brac 2 isoform X2
gene6770	gene6770	gene5126	gene8785								gene6770	107964911	LOC107964911	CRISP/Allergen/PR-1
gene4590	gene4590	gene7423	gene8037								gene4590	408851	LOC408851	putative cysteine proteinase CG12163 isoform X1
gene8829	gene8829	gene7942	gene7719								gene8829	412278	LOC412278	tuberin isoform X1
gene3936	gene3936	gene8255	gene8302								gene3936	411633	LOC411633	UDP-glucose 4-epimerase isoform X2
gene605	gene605	gene6037	gene360								gene605	412813	LOC412813	zwei Ig domain protein zig-8 isoform X1
gene11481	gene11481	gene11735	gene943								gene11481	409270	LOC409270	glycerol-3-phosphate acyltransferase 3 isoform X3
gene7754	gene7754	gene10109	gene5275								gene7754	724269	LOC724269	connectin
gene2767	gene2767	gene173	gene4201								gene2767	727159	LOC727159	CAP-Gly domain-containing linker protein 1 isoform X8
gene8322	gene8322	gene8322	gene5813								gene8322	726977	LOC726977	prostaglandin E synthase 2 isoform X2
gene6398	gene6398	gene10375	gene8166								gene6398	724393	LOC724393	uncharacterized protein LOC724393
gene10571	gene10571	gene5559	gene8951								gene10571	100576996	LOC100576996	uncharacterized protein LOC100576996
gene6087	gene6087	gene5574	gene9064								gene6087	408923	LOC408923	transcription initiation factor TFIID subunit 4 isoform X1
gene7465	gene7465	gene7847	gene711								gene7465	552345	LOC552345	gamma-1-syntrophin isoform X2
gene9508	gene9508	gene10608	gene9590								gene9508	408325	Cdk5	cyclin-dependent kinase 5
gene8041	gene8041	gene8605	gene9469								gene8041	410228	LOC410228	cAMP-dependent protein kinase catalytic subunit PRKX isoform X1
gene10784	gene10784	gene7446	gene8597								gene10784	107965532	LOC107965532	uncharacterized protein LOC107965532
gene11854	gene11854	gene9024	gene9628								gene11854	100576958	LOC100576958	WD repeat-containing protein 81
gene3688	gene3688	gene6152	gene10578								gene3688	552007	LOC552007	pyruvate kinase isoform X2
gene8245	gene8245	gene7938	gene1324								gene8245	726389	LOC726389	glycerophosphodiester phosphodiesterase 1 isoform X2
gene5126	gene5126	gene7180	gene10441								gene5126	408894	LOC408894	protein groucho isoform X1
gene1206	gene1206	gene1476	gene4674								gene1206	413576	LOC413576	facilitated trehalose transporter Tret1-2 homolog
gene10774	gene10774	gene2245	gene10089								gene10774	406155	PPO	phenoloxidase subunit A3
gene8900	gene8900	gene10385	gene1149								gene8900	550655	LOC550655	protein FAM49B isoform X2
gene5459	gene5459	gene3356	gene995								gene5459	411142	LOC411142	solute carrier family 25 member 46
gene12234	gene12234	gene11625	gene3836								gene12234	413408	LOC413408	scavenger receptor class B member 1
gene4987	gene4987	gene4244	gene9308								gene4987	726174	LOC726174	succinate dehydrogenase assembly factor 4, mitochondrial
gene6929	gene6929	gene11017	gene9298								gene6929	409557	LOC409557	protein maelstrom
gene8845	gene8845	gene686	gene8299								gene8845	552085	LOC552085	developmentally-regulated GTP-binding protein 2 isoform X1
gene7313	gene7313	gene8152	gene163								gene7313	102655174	LOC102655174
gene9569	gene9569	gene2929	gene4127								gene9569	413539	LOC413539	insulin-degrading enzyme isoform X1
gene12023	gene12023	gene838	gene3659								gene12023	409572	LOC409572	TWiK family of potassium channels protein 9
gene11762	gene11762	gene6218	gene2636								gene11762	412789	LOC412789	NHL repeat-containing protein 2 isoform X1
gene6502	gene6502	gene2186	gene12250								gene6502	100578828	LOC100578828	uncharacterized protein LOC100578828
gene264	gene264	gene5865	gene11190								gene264	412511	LOC412511	importin subunit alpha-3
gene7736	gene7736	gene7330	gene6607								gene7736	408980	LOC408980	nucleic acid dioxygenase ALKBH1
gene11088	gene11088	gene8285	gene8862								gene11088	727128	LOC727128	60S ribosomal protein L34
gene1296	gene1296	gene1231	gene6829								gene1296	725981	LOC725981	protein TIPIN homolog
gene5078	gene5078	gene1686	gene9492								gene5078	409452	LOC409452	maltase A2 isoform X1
gene3419	gene3419	gene6553	gene8920								gene3419	409794	LOC409794	ubiquitin-conjugating enzyme E2 J1 isoform X1
gene4335	gene4335	gene2203	gene11032								gene4335	412966	LOC412966	pre-mRNA-splicing factor ISY1 homolog
gene9260	gene9260	gene4761	gene10008								gene9260	409475	LOC409475	26S proteasome non-ATPase regulatory subunit 2
gene10118	gene10118	gene6374	gene8926								gene10118	100576851	LOC100576851	ornithine decarboxylase antizyme 1, partial
gene4277	gene4277	gene8474	gene547								gene4277	413169	LOC413169	presenilin-1
gene11713	gene11713	gene11168	gene12025								gene11713	726041	LOC726041	DNA-directed primase/polymerase protein isoform X2
gene4921	gene4921	gene6444	gene4814								gene4921	726672	LOC726672	uncharacterized protein LOC726672
gene4416	gene4416	gene3053	gene300								gene4416	412543	LOC412543	uncharacterized protein LOC412543 isoform X4
gene8906	gene8906	gene1342	gene560								gene8906	408345	LOC408345	E3 ubiquitin-protein ligase ZNF598
gene964	gene964	gene4057	gene10178								gene964	409909	LOC409909	small glutamine-rich tetratricopeptide repeat-containing protein alpha isoform X1
gene11952	gene11952	gene8323	gene10104								gene11952	552756	LOC552756	cathepsin L1
gene8567	gene8567	gene6370	gene9622								gene8567	410375	LOC410375	uncharacterized protein LOC410375 isoform X1
gene6366	gene6366	gene4973	gene11253								gene6366	411841	LOC411841	synembryn
gene10190	gene10190	gene10765	gene9162								gene10190	100577045	LOC100577045	uncharacterized protein LOC100577045 isoform X2
gene5574	gene5574	gene12161	gene4993								gene5574	552472	LOC552472	eukaryotic translation initiation factor 2-alpha kinase 1
gene3949	gene3949	gene10661	gene283								gene3949	410982	LOC410982	protein croquemort
gene6637	gene6637	gene8153	gene1538								gene6637	724571	LOC724571	atrial natriuretic peptide receptor 1 isoform X1
gene9174	gene9174	gene3483	gene4922								gene9174	552683	LOC552683	chitinase domain-containing protein 1
gene4001	gene4001	gene2429	gene1398								gene4001	725337	LOC725337	tRNA modification GTPase GTPBP3, mitochondrial isoform X2
gene8472	gene8472	gene4579	gene10231								gene8472	551724	LOC551724	S-adenosylmethionine decarboxylase proenzyme
gene6189	gene6189	gene8599	gene11106								gene6189	551337	LOC551337	flotillin-1 isoform X5
gene11130	gene11130	gene7271	gene7107								gene11130	727311	LOC727311	band 7 protein AGAP004871 isoform X1
gene12181	gene12181	gene8808	gene4528								gene12181	412890	LOC412890	A disintegrin and metalloproteinase with thrombospondin motifs 3
gene9492	gene9492	gene9960	gene6049								gene9492	724545	LOC724545	uncharacterized protein LOC724545 isoform X1
gene1770	gene1770	gene2323	gene10204								gene1770	408710	LOC408710	KH domain-containing, RNA-binding, signal transduction-associated protein 2 isoform X2
gene2667	gene2667	gene9431	gene6286								gene2667	100576737	LOC100576737	uncharacterized protein LOC100576737 isoform X2
gene291	gene291	gene8023	gene11703								gene291	102654894	LOC102654894	integrator complex subunit 12-like
gene1621	gene1621	gene2288	gene900								gene1621	409793	LOC409793	NADH dehydrogenase
gene9325	gene9325	gene927	gene5201								gene9325	409241	LOC409241	prohormone-4
gene8073	gene8073	gene9908	gene7949								gene8073	113219060	LOC113219060
gene3284	gene3284	gene11382	gene4157								gene3284	412166	LOC412166	acyl-CoA Delta(11) desaturase
gene10893	gene10893	gene2671	gene197								gene10893	726392	LOC726392	sodium-independent sulfate anion transporter isoform X1
gene10321	gene10321	gene3182	gene4633								gene10321	725619	LOC725619	uncharacterized protein LOC725619
gene7932	gene7932	gene5975	gene11952								gene7932	412863	LOC412863	histone demethylase UTY
gene10220	gene10220	gene11367	gene4997								gene10220	107965416	LOC107965416
gene940	gene940	gene10470	gene6548								gene940	724618	LOC724618	cysteine-rich motor neuron 1 protein
gene6279	gene6279	gene7706	gene8017								gene6279	102656347	LOC102656347
gene12055	gene12055	gene9911	gene10203								gene12055	725928	LOC725928	dedicator of cytokinesis protein 3 isoform X2
gene10980	gene10980	gene7163	gene10331								gene10980	410530	LOC410530	alkaline phosphatase
gene145	gene145	gene140	gene1642								gene145	412473	LOC412473	39S ribosomal protein L28, mitochondrial
gene8972	gene8972	gene7851	gene11555								gene8972	727405	LOC727405	interaptin
gene5189	gene5189	gene6788	gene1954								gene5189	411172	LOC411172	tetratricopeptide repeat protein 5
gene2968	gene2968	gene2109	gene1585								gene2968	725960	LOC725960	neurofilament heavy polypeptide
gene386	gene386	gene1576	gene7682								gene386	100578378	LOC100578378
gene9349	gene9349	gene5725	gene4223								gene9349	550984	LOC550984	uncharacterized protein LOC550984 isoform X1
gene4624	gene4624	gene4802	gene8325								gene4624	408857	LOC408857	hemicentin-1 isoform X1
gene2336	gene2336	gene6234	gene7761								gene2336	408658	CSP2	chemosensory protein 2 precursor
gene6564	gene6564	gene2961	gene4488								gene6564	100576912	LOC100576912	cyclic AMP response element-binding protein A
gene896	gene896	gene10686	gene3575								gene896	100577753	LOC100577753	uncharacterized protein LOC100577753
gene6073	gene6073	gene10114	gene3214								gene6073	100576293	LOC100576293	zinc finger protein 182
gene2226	gene2226	gene8845	gene9515								gene2226	725358	LOC725358	protein YIPF1
gene4383	gene4383	gene5303	gene4806								gene4383	411090	LOC411090	tubulin--tyrosine ligase-like protein 12
gene8385	gene8385	gene11234	gene7992								gene8385	102654388	LOC102654388
gene9749	gene9749	gene11129	gene2007								gene9749	113219158	LOC113219158
gene3731	gene3731	gene4399	gene12157								gene3731	102656652	LOC102656652	vesicle-associated membrane protein 4-like isoform X2
gene7991	gene7991	gene4554	gene9882								gene7991	551787	LOC551787	HMG box transcription factor BBX isoform X1
gene3527	gene3527	gene7049	gene6578								gene3527	409172	LOC409172	xaa-Pro aminopeptidase 1 isoform X2
gene1797	gene1797	gene2767	gene9069								gene1797	102654426	LOC102654426	60S ribosomal protein L18
gene11206	gene11206	gene9919	gene3498								gene11206	409573	LOC409573	zinc finger protein 260 isoform X1
gene4801	gene4801	gene5704	gene8901								gene4801	410097	LOC410097	DNA repair protein complementing XP-G cells
gene4476	gene4476	gene3417	gene6599								gene4476	411100	LOC411100	FGGY carbohydrate kinase domain-containing protein
gene5559	gene5559	gene4520	gene5457								gene5559	409946	LOC409946	V-type proton ATPase subunit d
gene8274	gene8274	gene1433	gene12309								gene8274	408283	LOC408283	E3 ubiquitin-protein ligase RNF13
gene9117	gene9117	gene2599	gene3731								gene9117	102653638	LOC102653638
gene12182	gene12182	gene10326	gene3027								gene12182	551079	LOC551079	uncharacterized protein LOC551079
gene1583	gene1583	gene8181	gene9605								gene1583	552364	LOC552364	gephyrin isoform X1
gene3148	gene3148	gene4955	gene3846								gene3148	107964218	LOC107964218
gene4169	gene4169	gene102	gene6170								gene4169	725015	LOC725015	monocarboxylate transporter 3 isoform X1
gene3034	gene3034	gene1295	gene5861								gene3034	410117	LOC410117	glycerophosphocholine phosphodiesterase GPCPD1 isoform X1
gene3645	gene3645	gene12267	gene4416								gene3645	413115	CPR19	cuticular protein 19 precursor
gene1676	gene1676	gene11766	gene11632								gene1676	100578507	LOC100578507	uncharacterized protein LOC100578507 isoform X2
gene806	gene806	gene7233	gene4882								gene806	100576106	LOC100576106	uncharacterized protein DDB_G0292186
gene10147	gene10147	gene8411	gene5150								gene10147	100578100	LOC100578100	uncharacterized protein LOC100578100
gene7784	gene7784	gene2208	gene6843								gene7784	551353	LOC551353	translocon-associated protein subunit alpha
gene2376	gene2376	gene10856	gene7627								gene2376	408648	LOC408648	RING finger protein 11
gene10203	gene10203	gene11782	gene11648								gene10203	410413	LOC410413	uncharacterized protein LOC410413
gene8948	gene8948	gene2360	gene10902								gene8948	100576913	LOC100576913
gene9892	gene9892	gene2645	gene2603								gene9892	412862	LOC412862	SET domain-containing protein SmydA-8
gene1148	gene1148	gene8387	gene9070								gene1148	552096	LOC552096	cytosolic carboxypeptidase 6
gene4076	gene4076	gene99	gene736								gene4076	551982	LOC551982	UPF0692 protein CG33108 isoform X1
gene2427	gene2427	gene4245	gene1640								gene2427	412506	LOC412506	general vesicular transport factor p115
gene1709	gene1709	gene2144	gene4476								gene1709	413147	LOC413147	probable ATP-dependent RNA helicase DHX35 isoform X1
gene4069	gene4069	gene6988	gene7272								gene4069	102656134	LOC102656134	transcriptional adapter 2B
gene119	gene119	gene3692	gene11116								gene119	409852	LOC409852	transcription factor SPT20 homolog
gene2803	gene2803	gene5576	gene1794								gene2803	100577047	LOC100577047	uncharacterized protein LOC100577047 isoform X1
gene2719	gene2719	gene5806	gene8203								gene2719	412524	LOC412524	calcium release-activated calcium channel protein 1 isoform X1
gene270	gene270	gene11336	gene5142								gene270	113219256	LOC113219256	replication protein A 32 kDa subunit-like
gene9499	gene9499	gene1209	gene5805								gene9499	410272	LOC410272	cationic amino acid transporter 2 isoform X2
gene7234	gene7234	gene1523	gene10497								gene7234	102656448	LOC102656448	glycerol-3-phosphate dehydrogenase
gene12011	gene12011	gene9614	gene1896								gene12011	102656258	LOC102656258	nuclear RNA export factor 2-like
gene1387	gene1387	gene2662	gene12055								gene1387	411882	LOC411882	ER membrane protein complex subunit 2-B
gene7174	gene7174	gene9327	gene10386								gene7174	552467	LOC552467	RNA-binding protein spenito isoform X2
gene742	gene742	gene7014	gene10684								gene742	411997	LOC411997	ATP-binding cassette sub-family G member 4 isoform X2
gene492	gene492	gene5301	gene10916								gene492	410741	LOC410741	proton-coupled amino acid transporter-like protein pathetic isoform X2
gene4439	gene4439	gene9460	gene10285								gene4439	100576101	LOC100576101	coiled-coil domain-containing protein 61 isoform X1
gene3115	gene3115	gene3340	gene8896								gene3115	410065	Cpap3-d	cuticular protein analogous to peritrophins 3-D precursor
gene1853	gene1853	gene11959	gene11284								gene1853	410883	LOC410883	charged multivesicular body protein 6
gene1030	gene1030	gene2146	gene8485								gene1030	551843	LOC551843	mitochondrial proton/calcium exchanger protein
gene3053	gene3053	gene10444	gene4609								gene3053	724344	LOC724344	probable Ras GTPase-activating protein isoform X9
gene2518	gene2518	gene3330	gene2289								gene2518	413484	LOC413484	LOW QUALITY PROTEIN: uncharacterized protein LOC413484
gene8284	gene8284	gene9397	gene10187								gene8284	100577102	LOC100577102	putative uncharacterized protein DDB_G0287457
gene842	gene842	gene9148	gene7952								gene842	107965163	LOC107965163	esterase B1
gene7369	gene7369	gene4532	gene829								gene7369	411371	LOC411371	microtubule-associated protein RP/EB family member 1 isoform X2
gene658	gene658	gene6873	gene3419								gene658	551620	LOC551620	pre-mRNA-processing-splicing factor 8
gene5941	gene5941	gene5599	gene1784								gene5941	102653770	LOC102653770
gene3460	gene3460	gene5106	gene3041								gene3460	409394	LOC409394	NEDD8-activating enzyme E1 catalytic subunit
gene1393	gene1393	gene6750	gene5391								gene1393	408641	LOC408641	uncharacterized protein LOC408641
gene5640	gene5640	gene4048	gene3676								gene5640	725801	LOC725801	G/T mismatch-specific thymine DNA glycosylase
gene9635	gene9635	gene10090	gene5483								gene9635	727237	LOC727237	carbonic anhydrase 2
gene873	gene873	gene7141	gene3431								gene873	725818	LOC725818	uncharacterized protein LOC725818 isoform X1
gene9371	gene9371	gene1031	gene977								gene9371	100820634	LOC100820634	potassium voltage-gated channel protein eag-like
gene8539	gene8539	gene10980	gene6365								gene8539	409863	LOC409863	ras-related protein Rab-21
gene12209	gene12209	gene3147	gene8834								gene12209	411815	LOC411815	WW domain-containing oxidoreductase isoform X1
gene11132	gene11132	gene5989	gene4523								gene11132	727320	LOC727320	U3 small nucleolar RNA-associated protein 18 homolog
gene6170	gene6170	gene9362	gene8790								gene6170	409045	LOC409045	transcription elongation regulator 1 isoform X3
gene2757	gene2757	gene10296	gene5807								gene2757	409346	LOC409346	TBC1 domain family member 1 isoform X1
gene6851	gene6851	gene7453	gene7263								gene6851	102656248	LOC102656248	uncharacterized protein LOC102656248
gene6879	gene6879	gene4062	gene5511								gene6879	100578909	LOC100578909	procollagen-lysine,2-oxoglutarate 5-dioxygenase 3 isoform X3
gene8426	gene8426	gene9930	gene9090								gene8426	410188	LOC410188	60S ribosomal protein L8
gene2688	gene2688	gene472	gene11052								gene2688	411411	LOC411411	NADH dehydrogenase
gene11817	gene11817	gene11507	gene9501								gene11817	551036	LOC551036	vacuole membrane protein 1 isoform X1
gene10231	gene10231	gene1996	gene6500								gene10231	408407	LOC408407	translation machinery-associated protein 7 homolog
gene8617	gene8617	gene10799	gene9812								gene8617	725390	LOC725390	leucine-rich melanocyte differentiation-associated protein
gene6458	gene6458	gene11126	gene4185								gene6458	100577756	LOC100577756	zinc finger protein 678
gene2106	gene2106	gene5699	gene5637								gene2106	725491	LOC725491	GPI mannosyltransferase 1 isoform X1
gene10720	gene10720	gene4463	gene10253								gene10720	100576767	LOC100576767	uncharacterized protein LOC100576767 isoform X2
gene10459	gene10459	gene1663	gene9486								gene10459	113219183	LOC113219183
gene3360	gene3360	gene3068	gene8853								gene3360	727071	LOC727071	acylglycerol kinase, mitochondrial
gene12309	gene12309	gene1211	gene4144								gene12309	113219359	LOC113219359	autophagy protein 12-like isoform X2
gene7743	gene7743	gene10222	gene9174								gene7743	727000	LOC727000	protein sprint isoform X4
gene11959	gene11959	gene8949	gene4547								gene11959	552533	LOC552533	GDP-Man:Man(3)GlcNAc(2)-PP-Dol alpha-1,2-mannosyltransferase
gene9332	gene9332	gene11312	gene9508								gene9332	100576717	LOC100576717	restin homolog
gene9051	gene9051	gene11604	gene7278								gene9051	552723	LOC552723	transmembrane 9 superfamily member 4
gene9392	gene9392	gene5752	gene1993								gene9392	113219080	LOC113219080
gene6836	gene6836	gene3405	gene3681								gene6836	107964838	LOC107964838	probable uridine nucleosidase 2
gene6043	gene6043	gene662	gene3738								gene6043	100577307	LOC100577307
gene5396	gene5396	gene8966	gene8197								gene5396	102654605	LOC102654605
gene7941	gene7941	gene7555	gene6223								gene7941	725611	LOC725611	DNA polymerase alpha catalytic subunit isoform X2
gene4243	gene4243	gene5203	gene426								gene4243	552771	LOC552771	hydroxyacid oxidase 1
gene8534	gene8534	gene378	gene6953								gene8534	409363	LOC409363	uncharacterized protein LOC409363
gene8979	gene8979	gene642	gene3684								gene8979	406097	LOC406097	integrin beta-PS isoform X2
gene8445	gene8445	gene801	gene7910								gene8445	727455	LOC727455	UBA-like domain-containing protein 2 isoform X1
gene9288	gene9288	gene11834	gene9661								gene9288	102654947	LOC102654947
gene580	gene580	gene2445	gene5892								gene580	107963982	LOC107963982	protein tweety isoform X1
gene4547	gene4547	gene6650	gene3849								gene4547	102654715	LOC102654715	uncharacterized protein LOC102654715
gene5041	gene5041	gene9252	gene10306								gene5041	102655446	LOC102655446	bromodomain-containing protein DDB_G0280777
gene5445	gene5445	gene11307	gene10327								gene5445	107964659	LOC107964659
gene10940	gene10940	gene3007	gene9076								gene10940	409276	LOC409276	phosphatidylinositol 5-phosphate 4-kinase type-2 alpha isoform X2
gene9155	gene9155	gene11628	gene9519								gene9155	412018	LOC412018	arginyl-tRNA--protein transferase 1 isoform X1
gene1406	gene1406	gene1520	gene9481								gene1406	412288	LOC412288	WD repeat-containing protein 7 isoform X1
gene2160	gene2160	gene8245	gene2362								gene2160	409235	LOC409235	neurotrimin
gene5093	gene5093	gene11281	gene9089								gene5093	100578667	LOC100578667
gene5478	gene5478	gene11821	gene8777								gene5478	100576696	LOC100576696
gene7402	gene7402	gene2158	gene8503								gene7402	411833	LOC411833	la protein homolog
gene4275	gene4275	gene10425	gene2999								gene4275	102656705	LOC102656705
gene3606	gene3606	gene8069	gene1229								gene3606	413371	LOC413371	mothers against decapentaplegic homolog 6
gene12025	gene12025	gene1321	gene11389								gene12025	725251	LOC725251	putative leucine-rich repeat-containing protein DDB_G0290503 isoform X1
gene2058	gene2058	gene8714	gene10681								gene2058	100577749	LOC100577749	uncharacterized protein LOC100577749
gene2933	gene2933	gene6771	gene8321								gene2933	551331	LOC551331	splicing factor 3B subunit 1 isoform X1
gene9823	gene9823	gene10813	gene2278								gene9823	100576266	LOC100576266	uncharacterized protein LOC100576266 isoform X1
gene10498	gene10498	gene4881	gene5374								gene10498	412936	LOC412936	LOW QUALITY PROTEIN: uncharacterized protein LOC412936
gene12059	gene12059	gene12064	gene3689								gene12059	551039	LOC551039	dihydrolipoyl dehydrogenase, mitochondrial
gene2208	gene2208	gene5078	gene3055								gene2208	724919	LOC724919	mitochondrial amidoxime reducing component 2
gene587	gene587	gene7846	gene1438								gene587	413470	LOC413470	60S ribosomal protein L17
gene9016	gene9016	gene2831	gene7631								gene9016	410317	LOC410317	small conductance calcium-activated potassium channel protein isoform X2
gene10441	gene10441	gene10390	gene10115								gene10441	410144	LOC410144	rac GTPase-activating protein 1
gene1849	gene1849	gene465	gene3179								gene1849	551123	LOC551123	RNA-binding protein Musashi homolog Rbp6 isoform X1
gene1809	gene1809	gene1269	gene8258								gene1809	410890	LOC410890	protein seele, partial
gene871	gene871	gene10077	gene913								gene871	725489	LOC725489	farnesol dehydrogenase isoform X3
gene9136	gene9136	gene1769	gene9457								gene9136	551707	LOC551707	RNA-binding protein with serine-rich domain 1
gene7733	gene7733	gene8267	gene8771								gene7733	408982	LOC408982	calcineurin B homologous protein 1
gene11852	gene11852	gene8499	gene11021								gene11852	724965	LOC724965	dnaJ homolog subfamily C member 5 isoform X2
gene8415	gene8415	gene11338	gene10766								gene8415	551360	LOC551360	transcription factor Ken isoform X2
gene6105	gene6105	gene2650	gene438								gene6105	414014	LOC414014	cold shock domain-containing protein E1
gene10326	gene10326	gene2644	gene6446								gene10326	410039	LOC410039	cysteine desulfurase, mitochondrial isoform X2
gene4254	gene4254	gene7051	gene9646								gene4254	107964473	LOC107964473
gene11484	gene11484	gene11130	gene6332								gene11484	409160	LOC409160	dihydropteridine reductase
gene10121	gene10121	gene2377	gene3334								gene10121	107965449	LOC107965449	ras-related protein RabJ isoform X1
gene2278	gene2278	gene4904	gene11046								gene2278	411766	LOC411766	beta-alanine-activating enzyme
gene11367	gene11367	gene11380	gene3508								gene11367	551770	LOC551770	cytosolic purine 5\\'-nucleotidase isoform X1
gene4230	gene4230	gene2928	gene654								gene4230	726551	LOC726551	DNA ligase 4 isoform X2
gene10331	gene10331	gene5742	gene7736								gene10331	410447	LOC410447	importin subunit beta-1 isoform X1
gene4677	gene4677	gene8247	gene8026								gene4677	408863	LOC408863	J domain-containing protein isoform X2
gene7123	gene7123	gene8065	gene11462								gene7123	726880	LOC726880	pancreatic lipase-related protein 2-like
gene900	gene900	gene12276	gene7310								gene900	107964025	LOC107964025	uncharacterized protein LOC107964025 isoform X2
gene4505	gene4505	gene5121	gene5887								gene4505	113218811	LOC113218811
gene3827	gene3827	gene170	gene3309								gene3827	726024	LOC726024	WW domain-binding protein 4 isoform X1
gene1858	gene1858	gene10472	gene940								gene1858	724553	LOC724553	membrane-bound transcription factor site-2 protease
gene9774	gene9774	gene10627	gene9349								gene9774	113219155	LOC113219155
gene5814	gene5814	gene6173	gene1853								gene5814	408945	LOC408945	sorting nexin-27 isoform X1
gene7030	gene7030	gene957	gene10979								gene7030	100577519	LOC100577519	alpha-(1,3)-fucosyltransferase 10, partial
gene11419	gene11419	gene7142	gene10284								gene11419	552690	LOC552690	oxysterol-binding protein-related protein 11
gene10506	gene10506	gene3687	gene7892								gene10506	551028	LOC551028	probable cytochrome P450 6a14
gene3087	gene3087	gene7454	gene4689								gene3087	104796781	Mir6042
gene4497	gene4497	gene10529	gene8675								gene4497	100577335	LOC100577335	protein rolling stone isoform X1
gene7938	gene7938	gene8938	gene8102								gene7938	551814	LOC551814	EF-hand domain-containing protein 1
gene6061	gene6061	gene10403	gene8928								gene6061	551224	LOC551224	aminopeptidase N isoform X1
gene7989	gene7989	gene11899	gene10022								gene7989	409472	LOC409472	protein Smaug homolog 1
gene9882	gene9882	gene4373	gene9954								gene9882	410371	LOC410371	calcium-transporting ATPase sarcoplasmic/endoplasmic reticulum type isoform X3
gene228	gene228	gene7868	gene2746								gene228	414017	LOC414017	protein Daple isoform X1
gene11720	gene11720	gene11246	gene1567								gene11720	102654111	LOC102654111	platelet glycoprotein V isoform X3
gene3574	gene3574	gene7695	gene1719								gene3574	724739	LOC724739	zinc finger protein 571-like isoform X1
gene10122	gene10122	gene4506	gene1721								gene10122	410402	LOC410402	serine proteinase stubble isoform X4
gene6211	gene6211	gene6138	gene2187								gene6211	100577498	LOC100577498	trichohyalin isoform X2
gene8070	gene8070	gene2507	gene7097								gene8070	412302	LOC412302	zinc finger C4H2 domain-containing protein isoform X3
gene1211	gene1211	gene4213	gene6087								gene1211	552128	LOC552128	isocitrate dehydrogenase
gene5275	gene5275	gene9452	gene5661								gene5275	410159	LOC410159	mediator of RNA polymerase II transcription subunit 13 isoform X1
gene3784	gene3784	gene4363	gene3862								gene3784	408789	LOC408789	uncharacterized protein LOC408789 isoform X1
gene10529	gene10529	gene8084	gene2590								gene10529	725711	LOC725711	activin receptor type-1 isoform X1
gene8884	gene8884	gene8849	gene1487								gene8884	552482	LOC552482	protoporphyrinogen oxidase
gene11380	gene11380	gene12316	gene3685								gene11380	409179	LOC409179	uncharacterized protein LOC409179
gene10694	gene10694	gene7480	gene11247								gene10694	725179	LOC725179	inositol hexakisphosphate and diphosphoinositol-pentakisphosphate kinase 2 isoform X3
gene10161	gene10161	gene10407	gene2301								gene10161	726790	LOC726790	uncharacterized protein LOC726790 isoform X2
gene8195	gene8195	gene11930	gene4920								gene8195	410217	LOC410217	structural maintenance of chromosomes protein 3
gene4598	gene4598	gene4914	gene5205								gene4598	411385	LOC411385	ester hydrolase C11orf54 homolog
gene686	gene686	gene2086	gene2960								gene686	413025	LOC413025	peroxidasin
gene7696	gene7696	gene2646	gene814								gene7696	551264	LOC551264	upstream stimulatory factor 1 isoform X1
gene4048	gene4048	gene5721	gene5674								gene4048	724450	LOC724450	uncharacterized protein LOC724450
gene6953	gene6953	gene9318	gene8284								gene6953	408973	LOC408973	neprilysin-1 isoform X3
gene429	gene429	gene4966	gene9794								gene429	410071	LOC410071	glycerol-3-phosphate phosphatase
gene4675	gene4675	gene7693	gene7402								gene4675	100576404	LOC100576404	probable helicase with zinc finger domain
gene10767	gene10767	gene10408	gene2681								gene10767	409408	LOC409408	nuclear valosin-containing protein-like
gene10686	gene10686	gene6727	gene225								gene10686	724646	LOC724646	uncharacterized protein LOC724646
gene5576	gene5576	gene3128	gene8962								gene5576	411638	LOC411638	transport and Golgi organization protein 6 homolog
gene10856	gene10856	gene11175	gene11831								gene10856	413601	LOC413601	adenine phosphoribosyltransferase
gene12126	gene12126	gene959	gene215								gene12126	551799	LOC551799	putative mediator of RNA polymerase II transcription subunit 26
gene11382	gene11382	gene11318	gene4675								gene11382	551721	LOC551721	V-type proton ATPase subunit B
gene918	gene918	gene8151	gene8005								gene918	724411	LOC724411	rhophilin-2
gene7116	gene7116	gene2516	gene10848								gene7116	100577363	LOC100577363	uncharacterized protein LOC100577363
gene1416	gene1416	gene4902	gene109								gene1416	726350	LOC726350	ATP-dependent RNA helicase DHX33
gene8920	gene8920	gene2738	gene10983								gene8920	724322	LOC724322	serum response factor homolog isoform X2
gene9628	gene9628	gene8472	gene2889								gene9628	411812	LOC411812	dual specificity protein kinase CLK2 isoform X2
gene2516	gene2516	gene7558	gene4411								gene2516	725740	LOC725740	uncharacterized protein LOC725740
gene3659	gene3659	gene10965	gene1994								gene3659	409596	LOC409596	uncharacterized protein KIAA0825 homolog isoform X3
gene7816	gene7816	gene10199	gene10894								gene7816	410245	LOC410245	urokinase-type plasminogen activator
gene2994	gene2994	gene7205	gene4222								gene2994	102654488	LOC102654488	mpv17-like protein
gene5731	gene5731	gene10455	gene5463								gene5731	100577220	LOC100577220	regulatory protein MIG1
gene6750	gene6750	gene9400	gene10884								gene6750	552552	LOC552552	uncharacterized protein LOC552552 isoform X1
gene6237	gene6237	gene7798	gene11421								gene6237	408901	LOC408901	actin-related protein 2/3 complex subunit 1A
gene2795	gene2795	gene9567	gene8458								gene2795	409865	LOC409865	protein retinal degeneration B isoform X1
gene479	gene479	gene2283	gene1296								gene479	552457	LOC552457	glucose dehydrogenase
gene11443	gene11443	gene6270	gene4093								gene11443	408538	LOC408538	uncharacterized protein LOC408538
gene754	gene754	gene4024	gene3306								gene754	724633	LOC724633	histone H2B
gene3972	gene3972	gene11039	gene5232								gene3972	551185	LOC551185	GTP-binding protein 1
gene4257	gene4257	gene3662	gene8213								gene4257	411083	LOC411083	sodium/potassium-transporting ATPase subunit alpha isoform X3
gene3445	gene3445	gene6717	gene8055								gene3445	551257	LOC551257	microtubule-associated protein Jupiter isoform X4
gene569	gene569	gene4169	gene577								gene569	409114	LOC409114	ATP synthase subunit alpha, mitochondrial
gene7790	gene7790	gene9490	gene11082								gene7790	410060	LOC410060	potassium voltage-gated channel protein Shab isoform X1
gene1149	gene1149	gene304	gene7546								gene1149	410688	LOC410688	RNA-binding protein 5 isoform X1
gene11236	gene11236	gene6590	gene9667								gene11236	100577418	LOC100577418	uncharacterized protein LOC100577418
gene225	gene225	gene665	gene1772								gene225	724795	LOC724795	WASH complex subunit 1
gene5122	gene5122	gene3476	gene2306								gene5122	411969	LOC411969	heterogeneous nuclear ribonucleoprotein M isoform X1
gene9363	gene9363	gene8029	gene5401								gene9363	552838	LOC552838	26S proteasome non-ATPase regulatory subunit 8
gene1125	gene1125	gene3688	gene7961								gene1125	408579	LOC408579	thrombospondin type-1 domain-containing protein 4 isoform X1
gene486	gene486	gene6106	gene9641								gene486	107964221	LOC107964221
gene5201	gene5201	gene570	gene2131								gene5201	551832	LOC551832	zinc finger matrin-type protein 2
gene10452	gene10452	gene10170	gene8633								gene10452	724505	LOC724505	PAN2-PAN3 deadenylation complex catalytic subunit PAN2 isoform X1
gene697	gene697	gene335	gene1207								gene697	552039	LOC552039	uncharacterized protein LOC552039, partial
gene5198	gene5198	gene6112	gene769								gene5198	100576703	LOC100576703	sarcalumenin isoform X2
gene2003	gene2003	gene8305	gene3031								gene2003	726793	LOC726793	uncharacterized protein LOC726793 isoform X2
gene7272	gene7272	gene8138	gene12007								gene7272	100577998	LOC100577998	origin recognition complex subunit 3 isoform X4
gene6891	gene6891	gene8906	gene2596								gene6891	551409	LOC551409	uncharacterized protein LOC551409 isoform X1
gene5485	gene5485	gene4260	gene5041								gene5485	413898	LOC413898	protein YIPF6
gene3353	gene3353	gene2554	gene11643								gene3353	412217	LOC412217	multidrug resistance-associated protein 1
gene6048	gene6048	gene6079	gene4069								gene6048	409364	LOC409364	CD2-associated protein
gene9800	gene9800	gene5608	gene9505								gene9800	410368	LOC410368	cadherin-23
gene2143	gene2143	gene5048	gene11687								gene2143	408681	LOC408681	solute carrier family 35 member F2 isoform X2
gene2978	gene2978	gene10323	gene11856								gene2978	726158	LOC726158	glutathione hydrolase 1 proenzyme isoform X4
gene227	gene227	gene10605	gene676								gene227	411799	LOC411799	N-acetylgalactosaminyltransferase 7
gene4419	gene4419	gene4273	gene4813								gene4419	100576826	LOC100576826	LHFPL tetraspan subfamily member 5 protein isoform X1
gene8005	gene8005	gene10816	gene6095								gene8005	100577877	LOC100577877	zinc finger protein 564
gene8425	gene8425	gene9648	gene3152								gene8425	408276	LOC408276	putative ATP-dependent RNA helicase Pl10
gene1395	gene1395	gene2800	gene9478								gene1395	551208	LOC551208	3-hydroxyisobutyrate dehydrogenase, mitochondrial isoform X1
gene2271	gene2271	gene12177	gene9500								gene2271	726461	LOC726461	protein shank isoform X7
gene8174	gene8174	gene3930	gene464								gene8174	724152	LOC724152	uncharacterized protein LOC724152
gene5995	gene5995	gene11028	gene4077								gene5995	551259	LOC551259	titin isoform X24
gene11467	gene11467	gene145	gene9502								gene11467	102654261	LOC102654261	uncharacterized protein C24H6.02c
gene10153	gene10153	gene2827	gene5968								gene10153	551650	LOC551650	syntenin-1 isoform X1
gene3052	gene3052	gene12059	gene11311								gene3052	412924	LOC412924	protein ROP isoform X1
gene10687	gene10687	gene10828	gene7941								gene10687	726057	ILP-2	insulin-like peptide 2 isoform X1
gene5699	gene5699	gene3052	gene4193								gene5699	552801	LOC552801	mitoferrin-1 isoform X1
gene2603	gene2603	gene7207	gene4383								gene2603	100577638	LOC100577638	uncharacterized protein LOC100577638 isoform X1
gene10826	gene10826	gene6364	gene7691								gene10826	494509	LOC494509	protein Malvolio isoform X1
gene11625	gene11625	gene5452	gene10498								gene11625	552839	LOC552839	TATA box-binding protein-associated factor RNA polymerase I subunit B
gene666	gene666	gene6298	gene1827								gene666	725105	LOC725105	ubiquinone biosynthesis protein COQ4 homolog, mitochondrial isoform X4
gene7082	gene7082	gene6189	gene3327								gene7082	727101	LOC727101	protein decapentaplegic
gene11973	gene11973	gene2428	gene7486								gene11973	410052	Syt20	synaptotagmin 20 isoform X2
gene311	gene311	gene6657	gene8426								gene311	726298	LOC726298	putative transcription factor SOX-15 isoform X2
gene10408	gene10408	gene7733	gene7763								gene10408	551812	LOC551812	mitochondrial tRNA-specific 2-thiouridylase 1
gene10878	gene10878	gene4422	gene11236								gene10878	100577030	LOC100577030	QRFP-like peptide receptor isoform X4
gene3835	gene3835	gene6101	gene2381								gene3835	100577548	LOC100577548	tubulin beta chain isoform X2
gene11695	gene11695	gene2719	gene2143								gene11695	725812	LOC725812	uncharacterized protein LOC725812
gene3037	gene3037	gene8786	gene9823								gene3037	552021	LOC552021	intraflagellar transport protein 80 homolog isoform X1
gene9498	gene9498	gene6911	gene3471								gene9498	410273	LOC410273	transcription termination factor 2
gene3670	gene3670	gene5461	gene11255								gene3670	411024	LOC411024	DDB1- and CUL4-associated factor 13
gene5454	gene5454	gene6281	gene11538								gene5454	409305	LOC409305	elongation factor-like GTPase 1
gene1273	gene1273	gene1678	gene11582								gene1273	725239	LOC725239	RNA-binding protein 33 isoform X1
gene1523	gene1523	gene2425	gene486								gene1523	100577959	LOC100577959	uncharacterized protein LOC100577959
gene965	gene965	gene4001	gene8220								gene965	100577521	LOC100577521	uncharacterized protein LOC100577521
gene4721	gene4721	gene3136	gene1251								gene4721	409979	LOC409979	DNA replication licensing factor Mcm7
gene4356	gene4356	gene7668	gene8033								gene4356	100578106	LOC100578106	uncharacterized protein LOC100578106 isoform X1
gene11648	gene11648	gene9702	gene8303								gene11648	406096	LOC406096	type I inositol 1,4,5-trisphosphate 5-phosphatase isoform X3
gene6270	gene6270	gene5189	gene4986								gene6270	100577931	LOC100577931	TELO2-interacting protein 2
gene9775	gene9775	gene4400	gene2884								gene9775	100576546	LOC100576546
gene4496	gene4496	gene8835	gene1255								gene4496	100577376	LOC100577376	voltage-dependent calcium channel subunit alpha-2/delta-3-like precursor
gene5166	gene5166	gene6369	gene6004								gene5166	413076	LOC413076	ecdysone-induced protein 78C isoform X4
gene7908	gene7908	gene4437	gene6992								gene7908	107965041	LOC107965041	solute carrier organic anion transporter family member 4A1-like isoform X1
gene5341	gene5341	gene6176	gene10728								gene5341	551973	LOC551973	cleavage and polyadenylation specificity factor subunit CG7185 isoform X11
gene6138	gene6138	gene9409	gene5817								gene6138	727227	LOC727227	epidermal growth factor receptor substrate 15-like 1 isoform X1
gene841	gene841	gene7488	gene8864								gene841	552229	LOC552229	esterase B1
gene6857	gene6857	gene10105	gene4335								gene6857	411282	LOC411282	basic-leucine zipper transcription factor A isoform X1
gene10026	gene10026	gene6162	gene42								gene10026	410380	LOC410380	neprilysin-2 isoform X1
gene2313	gene2313	gene9313	gene3056								gene2313	409086	LOC409086	caprin homolog
gene4252	gene4252	gene4308	gene10120								gene4252	411081	LOC411081	zinc finger protein-like 1
gene1317	gene1317	gene2779	gene9101								gene1317	550724	LOC550724	3-hydroxy-3-methylglutaryl-coenzyme A reductase isoform X1
gene11947	gene11947	gene2319	gene10564								gene11947	552675	LOC552675	myoneurin isoform X2
gene1204	gene1204	gene1738	gene1782								gene1204	413574	LOC413574	26S proteasome non-ATPase regulatory subunit 2
gene9049	gene9049	gene583	gene3110								gene9049	409396	LOC409396	eukaryotic translation initiation factor 4E-binding protein Mextli isoform X4
gene7942	gene7942	gene306	gene8450								gene7942	725653	LOC725653	pseudouridine-5\\'-phosphatase isoform X1
gene6675	gene6675	gene1841	gene5512								gene6675	550929	LOC550929	serine/threonine-protein kinase PINK1, mitochondrial
gene9457	gene9457	gene5337	gene9385								gene9457	725616	LOC725616	prohormone-1 isoform X1
gene6740	gene6740	gene11216	gene2318								gene6740	107964909	LOC107964909
gene811	gene811	gene12205	gene11888								gene811	724235	LOC724235	uncharacterized protein LOC724235
gene823	gene823	gene7990	gene8149								gene823	409718	LOC409718	PAN2-PAN3 deadenylation complex subunit PAN3
gene5466	gene5466	gene10715	gene4595								gene5466	412279	LOC412279	uncharacterized protein LOC412279
gene5134	gene5134	gene10009	gene5614								gene5134	100577517	LOC100577517	uncharacterized protein LOC100577517 isoform X6
gene5514	gene5514	gene6781	gene5034								gene5514	413356	LOC413356	UDP-glucose 6-dehydrogenase
gene11303	gene11303	gene948	gene9328								gene11303	100578262	LOC100578262	uncharacterized protein LOC100578262 isoform X1
gene103	gene103	gene9736	gene11315								gene103	409931	LOC409931	protein FAM69C isoform X1
gene10724	gene10724	gene2127	gene2893								gene10724	408449	LOC408449	thyrotroph embryonic factor isoform X1
gene8706	gene8706	gene11366	gene7908								gene8706	409534	LOC409534	uncharacterized protein LOC409534 isoform X2
gene8627	gene8627	gene10804	gene1724								gene8627	107965171	LOC107965171
gene7661	gene7661	gene744	gene9134								gene7661	408991	LOC408991	glutaminase liver isoform, mitochondrial isoform X1
gene4131	gene4131	gene3326	gene391								gene4131	725127	LOC725127	uncharacterized protein LOC725127 isoform X2
gene4017	gene4017	gene4291	gene279								gene4017	552566	LOC552566	1-acyl-sn-glycerol-3-phosphate acyltransferase gamma
gene9071	gene9071	gene11692	gene9631								gene9071	107965147	LOC107965147	uncharacterized protein LOC107965147
gene711	gene711	gene7033	gene11467								gene711	100577336	LOC100577336
gene6939	gene6939	gene5942	gene6929								gene6939	413875	LOC413875	60S ribosomal protein L31
gene11657	gene11657	gene4686	gene11131								gene11657	724733	LOC724733	methionine--tRNA ligase, mitochondrial
gene300	gene300	gene1826	gene4655								gene300	551202	LOC551202	intraflagellar transport protein 52 homolog
gene7199	gene7199	gene1030	gene5754								gene7199	725563	LOC725563	uncharacterized protein LOC725563
gene315	gene315	gene5459	gene1381								gene315	107966071	LOC107966071
gene6781	gene6781	gene7711	gene2932								gene6781	411269	LOC411269	solute carrier family 35 member E1 homolog
gene3328	gene3328	gene7926	gene4300								gene3328	411533	LOC411533	alpha-2-macroglobulin receptor-associated protein
gene8496	gene8496	gene4439	gene1228								gene8496	100328599	Dnmt1a	DNA methyltransferase 1a
gene3447	gene3447	gene1028	gene811								gene3447	102654674	LOC102654674
gene8605	gene8605	gene4709	gene8827								gene8605	725750	LOC725750	uncharacterized protein LOC725750 isoform X1
gene4697	gene4697	gene5208	gene8567								gene4697	552696	LOC552696	histone acetyltransferase KAT8 isoform X1
gene1156	gene1156	gene5592	gene6225								gene1156	552251	LOC552251	homeobox protein aristaless
gene3846	gene3846	gene5971	gene6149								gene3846	107964343	LOC107964343	serine/arginine repetitive matrix protein 1-like
gene3156	gene3156	gene6769	gene6457								gene3156	724737	LOC724737	trichohyalin
gene7981	gene7981	gene3034	gene6891								gene7981	413544	LOC413544	peptidylprolyl isomerase domain and WD repeat-containing protein 1 isoform X1
gene1570	gene1570	gene3025	gene3								gene1570	409530	LOC409530	unconventional myosin-Ie
gene11252	gene11252	gene3853	gene11807								gene11252	409835	LOC409835	E3 ubiquitin-protein ligase MARCH2
gene5742	gene5742	gene11817	gene9332								gene5742	551260	LOC551260	NAD-dependent protein deacylase Sirt4
gene5005	gene5005	gene7796	gene1073								gene5005	102653687	LOC102653687	uncharacterized protein LOC102653687
gene8066	gene8066	gene3412	gene11303								gene8066	412093	LOC412093	serine/threonine-protein phosphatase 1 regulatory subunit 10 isoform X1
gene7474	gene7474	gene4230	gene7665								gene7474	412784	LOC412784	mitochondrial intermediate peptidase
gene3154	gene3154	gene9953	gene4612								gene3154	100578706	LOC100578706	uncharacterized protein LOC100578706 isoform X1
gene8827	gene8827	gene8979	gene8293								gene8827	100578112	LOC100578112	adenylate kinase isoenzyme 5
gene6440	gene6440	gene3713	gene7765								gene6440	413029	LOC413029	serine/threonine-protein kinase OSR1 isoform X1
gene10251	gene10251	gene7048	gene11206								gene10251	726182	Vhdl	larval-specific very high density lipoprotein precursor
gene9693	gene9693	gene2165	gene8761								gene9693	100192202	Fibroin4	silk fibroin 4 precursor
gene1782	gene1782	gene9979	gene11657								gene1782	413265	LOC413265	uncharacterized protein LOC413265
gene3718	gene3718	gene6128	gene11341								gene3718	411202	LOC411202	1,5-anhydro-D-fructose reductase
gene12248	gene12248	gene1317	gene10704								gene12248	409366	LOC409366	integral membrane protein 2C
gene7286	gene7286	gene8477	gene1196								gene7286	102655639	LOC102655639	uncharacterized protein LOC102655639 isoform X1
gene2439	gene2439	gene6758	gene2216								gene2439	100576296	LOC100576296	xaa-Pro aminopeptidase 3
gene11350	gene11350	gene12252	gene4818								gene11350	408544	LOC408544	lysyl oxidase homolog 3 isoform X1
gene10661	gene10661	gene5740	gene614								gene10661	408446	LOC408446	probable aconitate hydratase, mitochondrial isoform X1
gene10297	gene10297	gene1308	gene2021								gene10297	724803	LOC724803	membrane metallo-endopeptidase-like 1 isoform X3
gene3236	gene3236	gene1403	gene690								gene3236	409543	LOC409543	importin subunit alpha-7
gene3164	gene3164	gene10357	gene10037								gene3164	408728	LOC408728	mediator of RNA polymerase II transcription subunit 18
gene6234	gene6234	gene8573	gene4505								gene6234	411192	LOC411192	ribosome biogenesis regulatory protein homolog
gene11473	gene11473	gene7422	gene6805								gene11473	552018	LOC552018	LOW QUALITY PROTEIN: probable tRNA (guanine(26)-N(2))-dimethyltransferase
gene10663	gene10663	gene8801	gene7469								gene10663	410484	LOC410484	trehalase isoform X2
gene156	gene156	gene8913	gene2499								gene156	107964165	LOC107964165
gene10916	gene10916	gene2122	gene1885								gene10916	408464	LOC408464	protein HGV2
gene948	gene948	gene8148	gene10506								gene948	725068	LOC725068	dynein heavy chain, cytoplasmic isoform X3
gene1609	gene1609	gene11664	gene8500								gene1609	727168	LOC727168	1,4-alpha-glucan-branching enzyme isoform X2
gene10719	gene10719	gene658	gene8955								gene10719	100576615	LOC100576615	J domain-containing protein DDB_G0295729 isoform X1
gene959	gene959	gene8319	gene8968								gene959	725028	LOC725028	F-box only protein 6
gene1719	gene1719	gene8975	gene3750								gene1719	100578429	LOC100578429	centrosomal protein of 152 kDa isoform X2
gene9309	gene9309	gene896	gene10321								gene9309	551313	LOC551313	calcineurin subunit B type 2
gene7011	gene7011	gene5080	gene755								gene7011	551376	LOC551376	activating signal cointegrator 1 complex subunit 1
gene3025	gene3025	gene7694	gene7630								gene3025	551478	LOC551478	mediator of RNA polymerase II transcription subunit 15 isoform X2
gene2800	gene2800	gene3098	gene7661								gene2800	408748	LOC408748	transmembrane protein 11, mitochondrial
gene5552	gene5552	gene9754	gene7235								gene5552	100577259	LOC100577259
gene3197	gene3197	gene8242	gene5166								gene3197	412675	LOC412675	aspartate aminotransferase, mitochondrial
gene3750	gene3750	gene695	gene697								gene3750	411515	LOC411515	60S ribosomal protein L44
gene11510	gene11510	gene7351	gene3794								gene11510	100577777	LOC100577777	cysteine-rich venom protein 1 isoform X1
gene2931	gene2931	gene4088	gene9817								gene2931	113218658	LOC113218658
gene4363	gene4363	gene3519	gene4771								gene4363	551548	LOC551548	L-asparaginase isoform X1
gene9029	gene9029	gene6558	gene8972								gene9029	410320	LOC410320	whirlin isoform X5
gene8283	gene8283	gene746	gene11472								gene8283	724626	LOC724626	uncharacterized protein LOC724626
gene6964	gene6964	gene5246	gene12021								gene6964	413048	LOC413048	bifunctional 3\\'-phosphoadenosine 5\\'-phosphosulfate synthase 2 isoform X2
gene7044	gene7044	gene5086	gene3013								gene7044	107964882	LOC107964882
gene769	gene769	gene4667	gene1586								gene769	409860	LOC409860	GPI ethanolamine phosphate transferase 3 isoform X1
gene10965	gene10965	gene5027	gene6146								gene10965	107965473	LOC107965473	uncharacterized protein LOC107965473
gene12064	gene12064	gene3982	gene539								gene12064	412084	LOC412084	leucine-rich repeat-containing protein 40 isoform X1
gene5880	gene5880	gene7421	gene6117								gene5880	107964778	LOC107964778
gene6754	gene6754	gene8806	gene8922								gene6754	409157	LOC409157	succinyl-CoA:3-ketoacid coenzyme A transferase 1, mitochondrial
gene8197	gene8197	gene624	gene9071								gene8197	410216	LOC410216	reticulocalbin-2
gene10514	gene10514	gene5323	gene1676								gene10514	100577322	LOC100577322	cell wall integrity and stress response component 2
gene1877	gene1877	gene1995	gene10512								gene1877	100578611	LOC100578611	uncharacterized protein LOC100578611 isoform X1
gene11846	gene11846	gene5436	gene11085								gene11846	412828	LOC412828	ubiquitin carboxyl-terminal hydrolase MINDY-3 homolog
gene8530	gene8530	gene7319	gene12043								gene8530	726895	LOC726895	uncharacterized protein C1orf112 homolog
gene9301	gene9301	gene938	gene4054								gene9301	409877	LOC409877	myeloid leukemia factor isoform X3
gene7990	gene7990	gene3260	gene4791								gene7990	724141	LOC724141	protein yippee-like 5
gene8410	gene8410	gene4003	gene8770								gene8410	102655465	LOC102655465
gene9910	gene9910	gene8811	gene5570								gene9910	411509	LOC411509	tRNA (adenine(58)-N(1))-methyltransferase catalytic subunit TRMT61A isoform X2
gene8053	gene8053	gene3954	gene11050								gene8053	412749	LOC412749	ATP-binding cassette sub-family B member 7, mitochondrial isoform X1
gene1142	gene1142	gene3869	gene8253								gene1142	724497	LOC724497	patched domain-containing protein 3 isoform X1
gene9328	gene9328	gene6672	gene11600								gene9328	411863	LOC411863	dehydrogenase/reductase SDR family member 7
gene7351	gene7351	gene8154	gene3439								gene7351	725136	LOC725136	aspartate--tRNA ligase, mitochondrial
gene10470	gene10470	gene9835	gene7790								gene10470	406092	For	cGMP-dependent protein kinase foraging isoform X1
gene10078	gene10078	gene3669	gene2502								gene10078	727118	LOC727118	cytochrome P450 302a1, mitochondrial
gene7415	gene7415	gene500	gene8861								gene7415	724440	LOC724440	calcium-transporting ATPase type 2C member 1
gene27	gene27	gene4277	gene9791								gene27	551203	LOC551203	E3 ubiquitin-protein ligase MYCBP2 isoform X1
gene11421	gene11421	gene3445	gene644								gene11421	100577122	LOC100577122	cellular tumor antigen p53 isoform X1
gene671	gene671	gene6440	gene4324								gene671	413759	LOC413759	SCY1-like protein 2 isoform X2
gene4813	gene4813	gene7956	gene7043								gene4813	552840	LOC552840	deoxynucleoside kinase
gene8784	gene8784	gene7978	gene3258								gene8784	409622	LOC409622	spermatogenesis-associated protein 20
gene11793	gene11793	gene10650	gene1898								gene11793	409682	LOC409682	NADP-dependent malic enzyme isoform X2
gene654	gene654	gene6349	gene1214								gene654	100576871	LOC100576871	probable serine/threonine-protein kinase ndrD isoform X1
gene6581	gene6581	gene9569	gene8731								gene6581	100576471	LOC100576471	uncharacterized protein LOC100576471
gene1723	gene1723	gene1026	gene2003								gene1723	102655792	LOC102655792
gene5384	gene5384	gene2293	gene1568								gene5384	411148	LOC411148	palmitoyltransferase Hip14 isoform X1
gene4818	gene4818	gene1621	gene180								gene4818	409729	LOC409729	zinc finger protein 608
gene4537	gene4537	gene8318	gene9499								gene4537	551890	LOC551890	probable serine incorporator isoform X1
gene7052	gene7052	gene7777	gene7684								gene7052	726625	LOC726625	4-coumarate--CoA ligase 1 isoform X1
gene2554	gene2554	gene833	gene8505								gene2554	413388	LOC413388	histone-lysine N-methyltransferase EHMT2 isoform X1
gene1732	gene1732	gene3297	gene9136								gene1732	725743	LOC725743	signal recognition particle 9 kDa protein
gene2343	gene2343	gene1763	gene3142								gene2343	552620	LOC552620	oxysterol-binding protein-related protein 9 isoform X1
gene9496	gene9496	gene10781	gene7632								gene9496	724290	LOC724290	uncharacterized protein LOC724290
gene306	gene306	gene12312	gene2608								gene306	408613	Syt1	synaptotagmin 1 isoform X2
gene11278	gene11278	gene2688	gene10998								gene11278	411902	LOC411902	transmembrane protein 205
gene9486	gene9486	gene459	gene5503								gene9486	409765	LOC409765	actin-related protein 6 isoform X1
gene945	gene945	gene11015	gene406								gene945	409074	LOC409074	V-type proton ATPase 21 kDa proteolipid subunit
gene418	gene418	gene6965	gene2062								gene418	414021	LOC414021	uncharacterized protein LOC414021 isoform X3
gene1721	gene1721	gene7215	gene1123								gene1721	725295	LOC725295	GRIP and coiled-coil domain-containing protein 1
gene2921	gene2921	gene10197	gene11169								gene2921	102655840	LOC102655840
gene7846	gene7846	gene11884	gene9654								gene7846	413510	LOC413510	SNF-related serine/threonine-protein kinase
gene3560	gene3560	gene9992	gene1311								gene3560	100577876	LOC100577876	viral IAP-associated factor homolog
gene9869	gene9869	gene2365	gene1810								gene9869	412742	LOC412742	chromatin-remodeling complex ATPase chain Iswi
gene2322	gene2322	gene12210	gene4133								gene2322	551891	LOC551891	molybdenum cofactor biosynthesis protein 1 isoform X1
gene8427	gene8427	gene3935	gene2247								gene8427	410187	LOC410187	esterase E4
gene577	gene577	gene12266	gene7721								gene577	409078	LOC409078	uncharacterized protein LOC409078 isoform X3
gene11338	gene11338	gene3303	gene9199								gene11338	413755	LOC413755	attractin isoform X2
gene5990	gene5990	gene2198	gene9871								gene5990	413354	LOC413354	integrin-linked protein kinase homolog pat-4
gene2055	gene2055	gene3198	gene9036								gene2055	551364	LOC551364	homeobox protein SIX3
gene4667	gene4667	gene9907	gene492								gene4667	726102	LOC726102	transmembrane protein 135
gene7281	gene7281	gene7937	gene6114								gene7281	113218980	LOC113218980
gene2037	gene2037	gene339	gene563								gene2037	100577670	LOC100577670	uncharacterized protein LOC100577670
gene6261	gene6261	gene8053	gene12015								gene6261	406072	Amih	hyperpolarization-activated ion channel isoform X9
gene8287	gene8287	gene4317	gene800								gene8287	102655329	LOC102655329	14-3-3 protein zeta isoform X3
gene6104	gene6104	gene8025	gene1126								gene6104	410162	LOC410162	ataxin-3 isoform X1
gene464	gene464	gene9894	gene3798								gene464	724328	LOC724328	arrestin domain-containing protein 17
gene2874	gene2874	gene7082	gene8095								gene2874	409968	LOC409968	protein transport protein Sec31A
gene11216	gene11216	gene9324	gene11105								gene11216	412489	LOC412489	protein RFT1 homolog
gene277	gene277	gene11854	gene4379								gene277	551443	LOC551443	uncharacterized protein LOC551443 isoform X2
gene339	gene339	gene9276	gene11590								gene339	410032	Trxr-1	thioredoxin reductase 1 isoform 1
gene7319	gene7319	gene7050	gene2254								gene7319	552433	LOC552433	ATP-binding cassette sub-family B member 8, mitochondrial
gene10109	gene10109	gene10783	gene10129								gene10109	727146	LOC727146	sphingomyelin phosphodiesterase isoform X1
gene11330	gene11330	gene4085	gene6192								gene11330	725786	LOC725786	ubiquitin-like domain-containing CTD phosphatase 1
gene2780	gene2780	gene2307	gene4124								gene2780	100576290	LOC100576290	WD repeat-containing protein 78
gene1158	gene1158	gene2920	gene437								gene1158	411351	LOC411351	elongation factor G, mitochondrial
gene1333	gene1333	gene9818	gene12066								gene1333	551868	LOC551868	kelch-like protein 5
gene9718	gene9718	gene10338	gene10859								gene9718	725617	LOC725617	sodium-coupled monocarboxylate transporter 1 isoform X1
gene4432	gene4432	gene8784	gene6340								gene4432	551128	LOC551128	26S proteasome regulatory subunit 4
gene4904	gene4904	gene1332	gene8884								gene4904	724259	LOC724259	trypsin-1, partial
gene557	gene557	gene7318	gene1288								gene557	102656489	LOC102656489	uncharacterized protein LOC102656489
gene2633	gene2633	gene2443	gene616								gene2633	102654462	LOC102654462
gene2277	gene2277	gene949	gene11939								gene2277	411765	LOC411765	rab GDP dissociation inhibitor beta
gene9856	gene9856	gene11132	gene2164								gene9856	724801	LOC724801	brain-specific homeobox protein homolog
gene2134	gene2134	gene9355	gene12062								gene2134	100577719	LOC100577719	uncharacterized protein LOC100577719
gene6407	gene6407	gene2448	gene2820								gene6407	409148	ATP5G2	ATP synthase lipid-binding protein, mitochondrial
gene502	gene502	gene3936	gene9340								gene502	726412	LOC726412	organic cation transporter protein isoform X2
gene741	gene741	gene7465	gene2160								gene741	726944	LOC726944	ATP-binding cassette sub-family G member 4 isoform X1
gene7463	gene7463	gene10767	gene6211								gene7463	725596	LOC725596	leukocyte receptor cluster member 8 homolog isoform X1
gene1332	gene1332	gene4207	gene4171								gene1332	550901	LOC550901	protein phosphatase methylesterase 1
gene11039	gene11039	gene8773	gene1755								gene11039	408477	LOC408477	NADH dehydrogenase
gene4503	gene4503	gene10909	gene4043								gene4503	113218559	LOC113218559	solute carrier family 52, riboflavin transporter, member 3-A-like
gene7956	gene7956	gene9450	gene983								gene7956	552246	LOC552246	transmembrane protein 43 homolog isoform X2
gene8678	gene8678	gene195	gene9255								gene8678	413567	LOC413567	L-xylulose reductase
gene895	gene895	gene2795	gene7947								gene895	409298	LOC409298	formylglycine-generating enzyme
gene9067	gene9067	gene12171	gene6245								gene9067	726896	LOC726896	zinc finger and BTB domain-containing protein 47
gene9667	gene9667	gene12248	gene4663								gene9667	100576951	LOC100576951	uncharacterized protein LOC100576951
gene2122	gene2122	gene12281	gene1352								gene2122	410848	LOC410848	jmjC domain-containing histone demethylation protein 1
gene7910	gene7910	gene8636	gene11265								gene7910	412782	LOC412782	nucleoside diphosphate kinase 7
gene8590	gene8590	gene12296	gene8935								gene8590	102656796	LOC102656796	LOW QUALITY PROTEIN: uncharacterized protein PFB0145c
gene2507	gene2507	gene3129	gene11461								gene2507	411365	LOC411365	beta-1,4-N-acetylgalactosaminyltransferase bre-4
gene4340	gene4340	gene1613	gene10726								gene4340	726309	LOC726309	protein artichoke
gene2164	gene2164	gene7823	gene9787								gene2164	725930	LOC725930	retinol dehydrogenase 12
gene7861	gene7861	gene1623	gene4430								gene7861	100578068	LOC100578068	lateral signaling target protein 2 homolog
gene12313	gene12313	gene5155	gene11887								gene12313	100577816	LOC100577816	gamma-tubulin complex component 6 isoform X2
gene8711	gene8711	gene684	gene4598								gene8711	409323	LOC409323	uncharacterized protein LOC409323
gene7283	gene7283	gene6763	gene4296								gene7283	409022	LOC409022	LOW QUALITY PROTEIN: zinc finger and BTB domain-containing protein 34
gene9304	gene9304	gene11093	gene2533								gene9304	412219	LOC412219	ubiquitin conjugation factor E4 B isoform X1
gene463	gene463	gene678	gene1949								gene463	409957	LOC409957	synaptotagmin-4
gene11989	gene11989	gene11146	gene6203								gene11989	724468	LOC724468	uncharacterized protein LOC724468
gene11131	gene11131	gene11010	gene7281								gene11131	412296	LOC412296	deformed epidermal autoregulatory factor 1
gene10726	gene10726	gene5758	gene4194								gene10726	409294	LOC409294	60S ribosomal protein L23
gene4248	gene4248	gene918	gene1489								gene4248	724169	LOC724169	transcription factor kayak isoform X2
gene10781	gene10781	gene10826	gene8878								gene10781	550734	LOC550734	thioredoxin-like protein 1
gene6441	gene6441	gene8425	gene15								gene6441	552631	LOC552631	transmembrane protein 26
gene8816	gene8816	gene11852	gene11012								gene8816	409494	LOC409494	methylglutaconyl-CoA hydratase, mitochondrial
gene2779	gene2779	gene6318	gene6454								gene2779	408751	LOC408751	E3 ubiquitin-protein ligase RNF185
gene699	gene699	gene5079	gene8144								gene699	410725	LOC410725	uncharacterized protein LOC410725 isoform X3
gene3518	gene3518	gene5103	gene7449								gene3518	551722	LOC551722	diacylglycerol kinase epsilon isoform X2
gene3841	gene3841	gene11091	gene6247								gene3841	410993	LOC410993	valacyclovir hydrolase
gene2533	gene2533	gene9741	gene3769								gene2533	412708	LOC412708	calcyclin-binding protein
gene7185	gene7185	gene898	gene3159								gene7185	102656685	LOC102656685	39S ribosomal protein L42, mitochondrial
gene4222	gene4222	gene1408	gene3473								gene4222	411080	LOC411080	serine/threonine-protein kinase greatwall isoform X2
gene9519	gene9519	gene4654	gene1797								gene9519	408331	LOC408331	histone deacetylase 4 isoform X1
gene4054	gene4054	gene4393	gene6604								gene4054	411809	LOC411809	enolase-phosphatase E1
gene7085	gene7085	gene6407	gene4109								gene7085	724439	LOC724439	uncharacterized protein LOC724439
gene1033	gene1033	gene10956	gene6497								gene1033	406110	TyrR
gene9177	gene9177	gene8793	gene7835								gene9177	410253	LOC410253	ataxin-2 homolog isoform X2
gene12369	gene12369	gene1406	gene1665								gene12369	807702	ND4	NADH dehydrogenase subunit 4 (mitochondrion)
gene8726	gene8726	gene2716	gene10146								gene8726	725688	LOC725688	lipopolysaccharide-induced tumor necrosis factor-alpha factor homolog isoform X1
gene2360	gene2360	gene7752	gene10121								gene2360	413207	LOC413207	Na(+)/H(+) exchange regulatory cofactor NHE-RF1
gene11909	gene11909	gene2061	gene529								gene11909	100577347	LOC100577347	SET and MYND domain-containing protein 4 isoform X1
gene1324	gene1324	gene2496	gene4987								gene1324	410791	LOC410791	mitochondrial uncoupling protein 2 isoform X1
gene1681	gene1681	gene7474	gene12247								gene1681	727534	LOC727534	ADP-ribose pyrophosphatase, mitochondrial isoform X1
gene9792	gene9792	gene11815	gene4206								gene9792	107965375	LOC107965375
gene2523	gene2523	gene917	gene9177								gene2523	413488	LOC413488	protein vav isoform X1
gene1824	gene1824	gene8133	gene10257								gene1824	725757	LOC725757	nuclear transcription factor Y subunit alpha isoform X3
gene6648	gene6648	gene10118	gene3827								gene6648	409264	LOC409264	ATPase ASNA1 homolog
gene7263	gene7263	gene3236	gene7685								gene7263	100576864	LOC100576864	myosin-2 heavy chain isoform X1
gene4077	gene4077	gene7011	gene1600								gene4077	725093	LOC725093	phosphofurin acidic cluster sorting protein 2 isoform X3
gene6688	gene6688	gene9309	gene3783								gene6688	107964813	LOC107964813
gene10099	gene10099	gene10823	gene7093								gene10099	726736	LOC726736	laminin subunit beta-1 isoform X2
gene4430	gene4430	gene2102	gene10078								gene4430	100576413	LOC100576413	uncharacterized protein PF11_0213 isoform X2
gene3185	gene3185	gene9737	gene3949								gene3185	410911	LOC410911	glycosaminoglycan xylosylkinase
gene6603	gene6603	gene3597	gene11410								gene6603	102656369	LOC102656369	uncharacterized protein LOC102656369
gene1157	gene1157	gene5756	gene4810								gene1157	409027	LOC409027	leucine-rich repeat and calponin homology domain-containing protein 1 isoform X2
gene9585	gene9585	gene2350	gene10190								gene9585	113219148	LOC113219148
gene1320	gene1320	gene4678	gene3656								gene1320	409062	LOC409062	COP9 signalosome complex subunit 2
gene4685	gene4685	gene11760	gene7532								gene4685	409153	LOC409153	zinc finger protein 423-like
gene3700	gene3700	gene8549	gene10710								gene3700	113218737	LOC113218737	uncharacterized protein LOC113218737
gene1526	gene1526	gene11148	gene5751								gene1526	100577920	LOC100577920	uncharacterized protein LOC100577920
gene4117	gene4117	gene6379	gene105								gene4117	113218793	LOC113218793
gene3494	gene3494	gene8234	gene7115								gene3494	726726	LOC726726	serine/arginine repetitive matrix protein 1 isoform X2
gene4936	gene4936	gene347	gene1952								gene4936	113218562	LOC113218562	trypsin-7-like
gene9816	gene9816	gene6588	gene7447								gene9816	725690	LOC725690	tetraspanin-3
gene570	gene570	gene1387	gene712								gene570	411573	LOC411573	cell cycle control protein 50A isoform X1
gene11040	gene11040	gene4178	gene2211								gene11040	408478	LOC408478	facilitated trehalose transporter Tret1
gene531	gene531	gene6265	gene587								gene531	408604	LOC408604	TBC1 domain family member 13 isoform X1
gene538	gene538	gene8256	gene2159								gene538	551241	LOC551241	peroxisomal membrane protein PMP34
gene10232	gene10232	gene4312	gene2669								gene10232	410423	LOC410423	uncharacterized protein LOC410423 isoform X1
gene8318	gene8318	gene6639	gene1803								gene8318	409315	LOC409315	PRKCA-binding protein isoform X4
gene6926	gene6926	gene4562	gene8900								gene6926	551553	LOC551553	facilitated trehalose transporter Tret1
gene5461	gene5461	gene5792	gene2251								gene5461	725436	LOC725436	dmX-like protein 2 isoform X4
gene6340	gene6340	gene5913	gene6857								gene6340	102653930	LOC102653930	DNA-directed RNA polymerase III subunit RPC10
gene11028	gene11028	gene1906	gene10984								gene11028	551561	LOC551561	poly(A) RNA polymerase, mitochondrial isoform X1
gene10327	gene10327	gene3518	gene10971								gene10327	725856	LOC725856	ras-related protein Rab-6.2
gene2676	gene2676	gene7089	gene10447								gene2676	412459	LOC412459	ankyrin repeat domain-containing protein 13D isoform X4
gene4193	gene4193	gene6130	gene2723								gene4193	725732	LOC725732	uncharacterized protein LOC725732 isoform X1
gene6219	gene6219	gene11114	gene2335								gene6219	408908	LOC408908	anoctamin-8 isoform X5
gene8256	gene8256	gene11481	gene6670								gene8256	100577672	LOC100577672	probable serine/threonine-protein kinase DDB_G0283337 isoform X1
gene3975	gene3975	gene6219	gene671								gene3975	552182	LOC552182	probable E3 ubiquitin-protein ligase MGRN1
gene2521	gene2521	gene214	gene4036								gene2521	413486	LOC413486	cytochrome b5 isoform X2
gene11748	gene11748	gene5673	gene786								gene11748	726616	LOC726616	uncharacterized protein LOC726616
gene9579	gene9579	gene8393	gene193								gene9579	725196	LOC725196	putative peptidyl-tRNA hydrolase PTRHD1
gene3798	gene3798	gene8382	gene10720								gene3798	408786	Dscam	Down syndrome cell adhesion molecule isoform X50
gene5865	gene5865	gene3197	gene10304								gene5865	100577986	LOC100577986	probable sodium/potassium/calcium exchanger CG1090
gene9409	gene9409	gene8585	gene6172								gene9409	726814	LOC726814	solute carrier family 2, facilitated glucose transporter member 1 isoform X1
gene5456	gene5456	gene3183	gene1767								gene5456	100577214	LOC100577214	protein giant-lens
gene1403	gene1403	gene4402	gene4743								gene1403	409392	LOC409392	ATPase WRNIP1
gene1712	gene1712	gene9947	gene6741								gene1712	412143	LOC412143	rho guanine nucleotide exchange factor 18 isoform X7
gene459	gene459	gene6237	gene1061								gene459	724115	LOC724115	phospholipase DDHD1 isoform X2
gene10407	gene10407	gene5190	gene8515								gene10407	411396	LOC411396	neprilysin-4 isoform X2
gene2289	gene2289	gene11762	gene5270								gene2289	411697	LOC411697	short-chain specific acyl-CoA dehydrogenase, mitochondrial
gene3575	gene3575	gene9260	gene5422								gene3575	411030	LOC411030	U4/U6.U5 tri-snRNP-associated protein 2
gene2437	gene2437	gene8931	gene3573								gene2437	551723	LOC551723	peptidyl-prolyl cis-trans isomerase-like 3
gene8549	gene8549	gene10244	gene11654								gene8549	550701	LOC550701	peptidyl-prolyl cis-trans isomerase FKBP8 isoform X1
gene6650	gene6650	gene9266	gene27								gene6650	411266	LOC411266	nicalin-1
gene11286	gene11286	gene9827	gene9338								gene11286	406147	LOC406147	short-chain dehydrogenase/reductase isoform X1
gene4655	gene4655	gene3873	gene2718								gene4655	725774	LOC725774	BLOC-1-related complex subunit 7
gene6907	gene6907	gene7991	gene7400								gene6907	413438	LOC413438	dynamin-like 120 kDa protein, mitochondrial isoform X6
gene8833	gene8833	gene371	gene7680								gene8833	413657	LOC413657	presequence protease, mitochondrial
gene6109	gene6109	gene6447	gene12153								gene6109	552605	LOC552605	lisH domain and HEAT repeat-containing protein KIAA1468 homolog isoform X1
gene5161	gene5161	gene11405	gene9503								gene5161	100578675	LOC100578675
gene6472	gene6472	gene1793	gene6389								gene6472	406154	PRF	profilin
gene8300	gene8300	gene4778	gene3171								gene8300	725048	LOC725048	nodal modulator 3 isoform X1
gene8025	gene8025	gene7927	gene2075								gene8025	412305	LOC412305	succinate-semialdehyde dehydrogenase, mitochondrial
gene3258	gene3258	gene6132	gene3830								gene3258	412235	LOC412235	caspase-1
gene8499	gene8499	gene12022	gene1002								gene8499	551243	LOC551243	LOW QUALITY PROTEIN: alanine--tRNA ligase, mitochondrial
gene9295	gene9295	gene6807	gene8852								gene9295	102655371	LOC102655371
gene7868	gene7868	gene11111	gene742								gene7868	413605	LOC413605	cytochrome c1, heme protein, mitochondrial isoform X2
gene9112	gene9112	gene8316	gene3162								gene9112	410349	LOC410349	UPF0598 protein CG30010
gene2365	gene2365	gene4076	gene5161								gene2365	552319	LOC552319	26S proteasome non-ATPase regulatory subunit 6
gene8698	gene8698	gene11806	gene6820								gene8698	551609	LOC551609	uncharacterized protein LOC551609
gene575	gene575	gene10940	gene5640								gene575	412114	LOC412114	ubiquitin carboxyl-terminal hydrolase 35
gene4127	gene4127	gene9041	gene2133								gene4127	409782	LOC409782	pikachurin
gene7165	gene7165	gene9367	gene8439								gene7165	726970	Amel_8916	cys-loop ligand-gated ion channel subunit 8916 isoform X1
gene10178	gene10178	gene1681	gene11163								gene10178	413267	LOC413267	protein kintoun isoform X2
gene3938	gene3938	gene1905	gene7572								gene3938	412574	LOC412574	PR domain zinc finger protein 10 isoform X3
gene5813	gene5813	gene3360	gene5416								gene5813	411227	LOC411227	tyrosine-protein phosphatase non-receptor type 9
gene6130	gene6130	gene3039	gene11713								gene6130	727251	LOC727251	DNA polymerase delta small subunit isoform X1
gene2445	gene2445	gene8820	gene1612								gene2445	113218654	LOC113218654
gene8102	gene8102	gene7057	gene8496								gene8102	411506	LOC411506	LOW QUALITY PROTEIN: dynein assembly factor 4, axonemal-like
gene5788	gene5788	gene10575	gene3944								gene5788	100576841	LOC100576841
gene6546	gene6546	gene1307	gene4714								gene6546	413618	LOC413618	uncharacterized protein LOC413618
gene9064	gene9064	gene2514	gene10515								gene9064	410332	LOC410332	breast cancer anti-estrogen resistance protein 3 isoform X3
gene1052	gene1052	gene9466	gene11747								gene1052	102654970	LOC102654970	protein tipE isoform X1
gene3340	gene3340	gene11473	gene3572								gene3340	726966	LOC726966	angiotensin-converting enzyme
gene10753	gene10753	gene9321	gene1220								gene10753	408452	LOC408452	cytochrome P450 9e2
gene10425	gene10425	gene4302	gene8174								gene10425	410467	LOC410467	uncharacterized protein LOC410467
gene9742	gene9742	gene10413	gene4150								gene9742	727561	LOC727561	importin subunit alpha
gene4542	gene4542	gene766	gene4884								gene4542	113218812	LOC113218812	uncharacterized protein LOC113218812 isoform X1
gene7663	gene7663	gene10544	gene10177								gene7663	726079	nAChRb2	nicotinic acetylcholine receptor beta2 subunit
gene2961	gene2961	gene6337	gene10753								gene2961	408740	LOC408740	phosphatase and actin regulator 4 isoform X5
gene1401	gene1401	gene2583	gene2								gene1401	408635	LOC408635	BTB/POZ domain-containing protein 1 isoform X1
gene6495	gene6495	gene7034	gene6512								gene6495	107964821	LOC107964821
gene4380	gene4380	gene1840	gene7715								gene4380	408836	LOC408836	unc-112-related protein
gene9817	gene9817	gene7035	gene3841								gene9817	406108	Tspan6	tetraspanin 6
gene5323	gene5323	gene8190	gene2512								gene5323	724350	LOC724350	4-hydroxybenzoate polyprenyltransferase, mitochondrial
gene6057	gene6057	gene7930	gene1605								gene6057	412808	LOC412808	aminopeptidase Ey isoform X1
gene10244	gene10244	gene1159	gene8954								gene10244	726093	LOC726093	tetratricopeptide repeat protein 14 homolog isoform X1
gene11932	gene11932	gene7176	gene7784								gene11932	552531	LOC552531	10 kDa heat shock protein, mitochondrial
gene7765	gene7765	gene3460	gene741								gene7765	100578212	LOC100578212	tektin-3
gene5129	gene5129	gene7780	gene7066								gene5129	409928	LOC409928	RNA polymerase II elongation factor Ell isoform X2
gene6280	gene6280	gene12223	gene10571								gene6280	113218946	LOC113218946
gene10534	gene10534	gene8815	gene10075								gene10534	551197	LOC551197	probable cytochrome P450 6a13
gene6550	gene6550	gene457	gene8858								gene6550	412200	LOC412200	threonine--tRNA ligase, cytoplasmic isoform X3
gene898	gene898	gene8300	gene2166								gene898	411715	LOC411715	phospholipase D3 isoform X1
gene4223	gene4223	gene2368	gene1955								gene4223	552691	LOC552691	serine/threonine-protein kinase VRK1
gene2819	gene2819	gene463	gene6289								gene2819	410950	LOC410950	TBC1 domain family member 9
gene3240	gene3240	gene9564	gene5182								gene3240	552608	LOC552608	uncharacterized protein LOC552608 isoform X1
gene2007	gene2007	gene9909	gene8229								gene2007	408697	LOC408697	KN motif and ankyrin repeat domain-containing protein 3 isoform X1
gene3158	gene3158	gene10905	gene2132								gene3158	102653826	LOC102653826
gene607	gene607	gene569	gene7283								gene607	409042	Crzr	corazonin receptor isoform X1
gene3696	gene3696	gene7792	gene10113								gene3696	724889	LOC724889	structural maintenance of chromosomes protein 1A-like
gene7271	gene7271	gene5233	gene8367								gene7271	411344	LOC411344	fasciclin-1 isoform X4
gene6295	gene6295	gene7068	gene5962								gene6295	725220	LOC725220	homeobox protein Nkx-6.1
gene10998	gene10998	gene2141	gene5486								gene10998	726322	LOC726322	uncharacterized protein LOC726322 isoform X1
gene10510	gene10510	gene11820	gene1256								gene10510	550956	LOC550956	ATP-dependent (S)-NAD(P)H-hydrate dehydratase
gene9417	gene9417	gene7981	gene683								gene9417	413336	LOC413336	ADP-dependent glucokinase
gene4260	gene4260	gene6754	gene10344								gene4260	724432	LOC724432	ribosomal RNA processing protein 36 homolog
gene2098	gene2098	gene11332	gene4242								gene2098	102653640	LOC102653640	glutamate receptor 1 isoform X2
gene1567	gene1567	gene9068	gene11901								gene1567	727456	LOC727456	glucose-6-phosphate 1-epimerase
gene3288	gene3288	gene805	gene10521								gene3288	409598	LOC409598	uncharacterized protein LOC409598
gene2724	gene2724	gene2439	gene7009								gene2724	551970	LOC551970	dual oxidase isoform X1
gene2187	gene2187	gene4319	gene5611								gene2187	410825	LOC410825	leucine-rich repeat and immunoglobulin-like domain-containing nogo receptor-interacting protein 3
gene2052	gene2052	gene8833	gene10287								gene2052	410872	LOC410872	SUMO-activating enzyme subunit 1
gene11743	gene11743	gene6435	gene4517								gene11743	408516	LOC408516	protein D2 isoform X1
gene9830	gene9830	gene11007	gene10238								gene9830	552347	LOC552347	E3 ubiquitin-protein ligase Hakai
gene9694	gene9694	gene5928	gene6712								gene9694	411622	LOC411622	uncharacterized protein LOC411622
gene244	gene244	gene4756	gene590								gene244	107963991	LOC107963991	probable phosphorylase b kinase regulatory subunit beta isoform X1
gene6697	gene6697	gene11198	gene8816								gene6697	412377	LOC412377	parafibromin
gene219	gene219	gene4717	gene4418								gene219	102653954	LOC102653954	uncharacterized protein LOC102653954
gene6843	gene6843	gene1781	gene4624								gene6843	411276	LOC411276	hybrid signal transduction histidine kinase D isoform X1
gene10335	gene10335	gene4002	gene10486								gene10335	726040	LOC726040	4-coumarate--CoA ligase 1 isoform X1
gene6717	gene6717	gene9643	gene2257								gene6717	409991	LOC409991	dnaJ homolog subfamily C member 11
gene6318	gene6318	gene11022	gene10020								gene6318	552710	LOC552710	asparagine synthetase domain-containing protein 1 isoform X4
gene360	gene360	gene2376	gene1333								gene360	411407	LOC411407	leucine-rich repeat-containing protein 47
gene5784	gene5784	gene2612	gene9504								gene5784	102654594	LOC102654594	WD repeat-containing protein 18
gene668	gene668	gene4228	gene3634								gene668	410061	LOC410061	type I inositol 3,4-bisphosphate 4-phosphatase isoform X1
gene11163	gene11163	gene6776	gene7705								gene11163	102653951	LOC102653951	ras-related and estrogen-regulated growth inhibitor-like
gene475	gene475	gene2528	gene6390								gene475	410743	LOC410743	glucose dehydrogenase
gene9631	gene9631	gene3234	gene7247								gene9631	727130	LOC727130	progestin and adipoQ receptor family member 4 isoform X1
gene10197	gene10197	gene6648	gene7730								gene10197	552398	LOC552398	beta-1,3-galactosyltransferase 1-like isoform X1
gene9646	gene9646	gene5458	gene7876								gene9646	100578805	LOC100578805	putative malate dehydrogenase 1B isoform X1
gene5956	gene5956	gene6698	gene4082								gene5956	551779	LOC551779	histone H2A.V
gene7555	gene7555	gene7795	gene6939								gene7555	409006	LOC409006	beta-arrestin-1 isoform X4
gene9697	gene9697	gene1593	gene1824								gene9697	409098	LOC409098	histone-lysine N-methyltransferase eggless
gene2144	gene2144	gene3775	gene6594								gene2144	408680	LOC408680	ryanodine receptor isoform X6
gene6992	gene6992	gene8274	gene8564								gene6992	725023	LOC725023	mediator of RNA polymerase II transcription subunit 26 isoform X2
gene7280	gene7280	gene9748	gene7418								gene7280	409023	LOC409023	methylthioribose-1-phosphate isomerase isoform X2
gene5763	gene5763	gene6494	gene10150								gene5763	102654592	LOC102654592	coiled-coil domain-containing protein 112
gene7421	gene7421	gene8534	gene9664								gene7421	409310	LOC409310	CSC1-like protein 2 isoform X1
gene8033	gene8033	gene9580	gene7234								gene8033	100577466	LOC100577466	uncharacterized protein LOC100577466
gene9224	gene9224	gene6800	gene6486								gene9224	107965250	LOC107965250	7SK snRNA methylphosphate capping enzyme isoform X1
gene7804	gene7804	gene8831	gene5923								gene7804	412053	LOC412053	reticulocyte-binding protein 2 isoform X1
gene10336	gene10336	gene5496	gene3161								gene10336	113219215	LOC113219215
gene2132	gene2132	gene1583	gene7398								gene2132	552101	LOC552101	uncharacterized protein LOC552101 isoform X1
gene3310	gene3310	gene2523	gene3253								gene3310	102654638	LOC102654638
gene6067	gene6067	gene916	gene7016								gene6067	724660	LOC724660	protein furry isoform X1
gene4070	gene4070	gene6235	gene7030								gene4070	406094	CSP3	chemosensory protein 3 precursor
gene10935	gene10935	gene9155	gene2968								gene10935	724594	LOC724594	ADP-ribosylation factor-like protein 4C
gene1364	gene1364	gene9931	gene12011								gene1364	409886	LOC409886	protein Mo25 isoform X1
gene12024	gene12024	gene244	gene2220								gene12024	113219326	LOC113219326	uncharacterized protein LOC113219326
gene4574	gene4574	gene3343	gene9178								gene4574	552106	LOC552106	uncharacterized protein LOC552106
gene11462	gene11462	gene1887	gene10214								gene11462	726417	LOC726417	uncharacterized protein LOC726417
gene8023	gene8023	gene1082	gene12115								gene8023	412304	DHRS4	dehydrogenase/reductase SDR family member 4 isoform X1
gene1980	gene1980	gene3213	gene4225								gene1980	100578520	Or58	odorant receptor 58
gene9979	gene9979	gene2433	gene2539								gene9979	552755	LOC552755	probable GDP-L-fucose synthase isoform X1
gene949	gene949	gene8813	gene7169								gene949	412081	LOC412081	uncharacterized protein LOC412081 isoform X4
gene11653	gene11653	gene11386	gene5675								gene11653	100577656	LOC100577656	uncharacterized protein LOC100577656
gene10247	gene10247	gene6792	gene4676								gene10247	408411	LOC408411	transcription factor Sox-2 isoform X1
gene10704	gene10704	gene2279	gene9579								gene10704	408447	LOC408447	neurotactin
gene2989	gene2989	gene11200	gene4336								gene2989	724214	LOC724214	gametogenetin-binding protein 2-like
gene10263	gene10263	gene4287	gene11742								gene10263	409825	LOC409825	T-complex protein 1 subunit epsilon
gene3498	gene3498	gene450	gene5633								gene3498	413884	LOC413884	ubiquitin-40S ribosomal protein S27a
gene5224	gene5224	gene445	gene3042								gene5224	100576517	LOC100576517
gene3779	gene3779	gene1470	gene4117								gene3779	411006	LOC411006	endoplasmic reticulum lectin 1 isoform X1
gene1896	gene1896	gene8222	gene10801								gene1896	724675	Cdc37	hsp90 co-chaperone Cdc37
gene5479	gene5479	gene5543	gene1416								gene5479	102655049	LOC102655049
gene6281	gene6281	gene3009	gene11309								gene6281	413002	LOC413002	uncharacterized protein LOC413002 isoform X1
gene10883	gene10883	gene8774	gene1710								gene10883	726184	LOC726184	uncharacterized protein LOC726184
gene2263	gene2263	gene6959	gene8071								gene2263	552747	LOC552747	glucosidase 2 subunit beta
gene8190	gene8190	gene10619	gene9638								gene8190	552522	LOC552522	alpha-(1,6)-fucosyltransferase
gene2608	gene2608	gene5104	gene4762								gene2608	412295	LOC412295	nose resistant to fluoxetine protein 6 isoform X1
gene12067	gene12067	gene10674	gene2052								gene12067	408559	LOC408559	retinal dehydrogenase 1
gene3687	gene3687	gene11329	gene9453								gene3687	724532	LOC724532	eukaryotic translation initiation factor 1A, X-chromosomal
gene10804	gene10804	gene4466	gene131								gene10804	409752	LOC409752	uncharacterized protein LOC409752 isoform X1
gene4698	gene4698	gene6077	gene1953								gene4698	552692	LOC552692	D-aspartate oxidase
gene7232	gene7232	gene11955	gene4921								gene7232	727630	LOC727630	V-type proton ATPase 116 kDa subunit a isoform X1
gene636	gene636	gene1158	gene11909								gene636	410116	LOC410116	transcription factor 25
gene9382	gene9382	gene1587	gene7743								gene9382	552830	LOC552830	alpha-soluble NSF attachment protein
gene5899	gene5899	gene5588	gene4599								gene5899	412394	LOC412394	alpha-L-fucosidase isoform X2
gene2199	gene2199	gene11818	gene11465								gene2199	410821	LOC410821	tetraspanin-9
gene11340	gene11340	gene575	gene2192								gene11340	100576173	LOC100576173
gene11032	gene11032	gene11529	gene2526								gene11032	552824	LOC552824	actin-like protein 6B
gene5945	gene5945	gene11828	gene8590								gene5945	100578995	LOC100578995	vanin-like protein 1
gene6112	gene6112	gene8889	gene12182								gene6112	411199	LOC411199	sodium-dependent neutral amino acid transporter B(0)AT3
gene4777	gene4777	gene4432	gene2134								gene4777	412580	LOC412580	protein arginine N-methyltransferase 3
gene8252	gene8252	gene724	gene3022								gene8252	100577603	LOC100577603	POU domain protein CF1A
gene5684	gene5684	gene7775	gene2945								gene5684	552491	LOC552491	equilibrative nucleoside transporter 1 isoform X2
gene10483	gene10483	gene11676	gene689								gene10483	725099	LOC725099	spermidine synthase isoform X1
gene10204	gene10204	gene6633	gene7124								gene10204	100576671	LOC100576671	polycomb group protein Psc isoform X1
gene4535	gene4535	gene10771	gene11809								gene4535	412641	LOC412641	EF-hand domain-containing family member C2 isoform X1
gene9748	gene9748	gene9507	gene11057								gene9748	413660	LOC413660	ATP-dependent RNA helicase DDX54
gene3172	gene3172	gene3482	gene2869								gene3172	100578320	LOC100578320
gene9202	gene9202	gene11929	gene9798								gene9202	410258	LOC410258	selenide, water dikinase
gene3725	gene3725	gene1319	gene7628								gene3725	411207	LOC411207	CCAAT/enhancer-binding protein
gene5112	gene5112	gene11660	gene11588								gene5112	551020	LOC551020	probable protein phosphatase 2C T23F11.1 isoform X1
gene7914	gene7914	gene7737	gene6507								gene7914	725108	LOC725108	uncharacterized protein LOC725108 isoform X1
gene11907	gene11907	gene9849	gene1426								gene11907	726251	LOC726251	uncharacterized protein LOC726251
gene1981	gene1981	gene1452	gene11910								gene1981	102653637	LOC102653637	odorant receptor 4-like isoform X1
gene9727	gene9727	gene11345	gene11343								gene9727	413125	LOC413125	LIM/homeobox protein Lhx9
gene693	gene693	gene6366	gene8131								gene693	725848	LOC725848	uncharacterized protein LOC725848
gene5150	gene5150	gene1891	gene12121								gene5150	408891	LOC408891	methyl-CpG-binding domain protein 2 isoform X4
gene7205	gene7205	gene7232	gene806								gene7205	412446	LOC412446	SCY1-like protein 2
gene11815	gene11815	gene4320	gene1181								gene11815	551119	LOC551119	pyridoxal phosphate homeostasis protein
gene5743	gene5743	gene3888	gene3148								gene5743	551225	LOC551225	puff-specific protein Bx42
gene6115	gene6115	gene10906	gene11195								gene6115	408916	LOC408916	JNK-interacting protein 1 isoform X1
gene10077	gene10077	gene778	gene6175								gene10077	552758	LOC552758	retinol dehydrogenase 12
gene8770	gene8770	gene5537	gene8328								gene8770	100578194	LOC100578194
gene757	gene757	gene6666	gene493								gene757	726264	LOC726264	mitochondrial carrier homolog 2 isoform X3
gene6974	gene6974	gene1009	gene11915								gene6974	102655072	LOC102655072	microtubule-associated protein futsch-like isoform X2
gene6365	gene6365	gene1807	gene3429								gene6365	726572	LOC726572	reticulon-4 receptor-like 2 isoform X3
gene10771	gene10771	gene4166	gene8570								gene10771	411661	LOC411661	solute carrier family 12 member 9
gene8138	gene8138	gene1437	gene7571								gene8138	100577343	LOC100577343	uncharacterized protein LOC100577343
gene1282	gene1282	gene7041	gene3702								gene1282	410669	LOC410669	single-minded homolog 2 isoform X3
gene1319	gene1319	gene10694	gene5272								gene1319	413118	LOC413118	neuroblastoma-amplified sequence
gene157	gene157	gene3804	gene9392								gene157	100576540	LOC100576540	vacuolar protein sorting-associated protein 27
gene2175	gene2175	gene9440	gene11110								gene2175	412133	LOC412133	ubinuclein-1 isoform X2
gene3982	gene3982	gene1320	gene3664								gene3982	552720	LOC552720	V-type proton ATPase subunit E
gene4754	gene4754	gene2976	gene5221								gene4754	100576966	LOC100576966	trichohyalin isoform X1
gene6289	gene6289	gene3965	gene11709								gene6289	102655790	LOC102655790
gene4067	gene4067	gene1836	gene1339								gene4067	724385	LOC724385	uncharacterized protein LOC724385 isoform X2
gene5512	gene5512	gene2618	gene5678								gene5512	102655018	LOC102655018
gene9386	gene9386	gene10000	gene8632								gene9386	100576985	LOC100576985	uncharacterized protein LOC100576985 isoform X1
gene8133	gene8133	gene6760	gene1219								gene8133	551610	LOC551610	deoxyribodipyrimidine photo-lyase isoform X1
gene10184	gene10184	gene2235	gene7252								gene10184	552191	LOC552191	endoplasmic reticulum resident protein 44 isoform X1
gene7792	gene7792	gene11081	gene1560								gene7792	102655648	LOC102655648	FAD synthase
gene9978	gene9978	gene318	gene2336								gene9978	413224	LOC413224	sn1-specific diacylglycerol lipase alpha isoform X3
gene3374	gene3374	gene8054	gene210								gene3374	102654271	LOC102654271	transcriptional regulator ATRX homolog
gene1905	gene1905	gene1550	gene7640								gene1905	551872	LOC551872	porphobilinogen deaminase
gene7312	gene7312	gene8523	gene4764								gene7312	412091	LOC412091	A disintegrin and metalloproteinase with thrombospondin motifs 9 isoform X2
gene3343	gene3343	gene1609	gene7248								gene3343	726989	LOC726989	E3 ubiquitin-protein ligase listerin
gene1021	gene1021	gene1243	gene5038								gene1021	413670	LOC413670	uncharacterized F-box/LRR-repeat protein C02F5.7 isoform X1
gene1200	gene1200	gene942	gene2148								gene1200	408575	LOC408575	DNA methyltransferase 1-associated protein 1
gene9839	gene9839	gene10946	gene1639								gene9839	100578927	LOC100578927	transcriptional repressor protein YY1 isoform X2
gene10309	gene10309	gene5438	gene5784								gene10309	102655427	LOC102655427
gene6500	gene6500	gene756	gene7755								gene6500	100578051	LOC100578051	uncharacterized protein LOC100578051 isoform X1
gene1705	gene1705	gene11128	gene273								gene1705	102656852	LOC102656852
gene11471	gene11471	gene7801	gene10687								gene11471	102654477	LOC102654477
gene2570	gene2570	gene2435	gene6293								gene2570	100578418	LOC100578418	uncharacterized protein LOC100578418 isoform X2
gene5869	gene5869	gene5520	gene5315								gene5869	102653587	LOC102653587	uncharacterized protein LOC102653587 isoform X1
gene5354	gene5354	gene12211	gene11570								gene5354	413746	LOC413746	adrenodoxin
gene8636	gene8636	gene9708	gene6458								gene8636	725923	LOC725923	serine/threonine-protein kinase N isoform X3
gene9568	gene9568	gene142	gene3117								gene9568	411789	LOC411789	protein krasavietz
gene689	gene689	gene11846	gene1570								gene689	100578631	LOC100578631	uncharacterized protein LOC100578631
gene1308	gene1308	gene12131	gene2670								gene1308	551386	LOC551386	26S proteasome regulatory subunit 10B
gene6940	gene6940	gene4703	gene7875								gene6940	552560	LOC552560	protein phosphatase 1 regulatory subunit 14C
gene7430	gene7430	gene5123	gene9944								gene7430	727324	LOC727324	prolactin-releasing peptide receptor
gene2312	gene2312	gene9777	gene1492								gene2312	552092	LOC552092	uncharacterized protein LOC552092 isoform X1
gene929	gene929	gene4015	gene270								gene929	552091	LOC552091	group XV phospholipase A2 isoform X2
gene943	gene943	gene10817	gene4196								gene943	409075	LOC409075	mesoderm induction early response protein 1 isoform X2
gene11245	gene11245	gene4556	gene3289								gene11245	726435	LOC726435	signal recognition particle subunit SRP72
gene2131	gene2131	gene9489	gene5888								gene2131	552124	LOC552124	CD151 antigen
gene7840	gene7840	gene6437	gene9938								gene7840	412476	LOC412476	serine-enriched protein isoform X2
gene7480	gene7480	gene6475	gene3363								gene7480	726077	LOC726077	putative ATP-dependent RNA helicase DHX30
gene5588	gene5588	gene4696	gene12222								gene5588	412367	LOC412367	39S ribosomal protein L15, mitochondrial
gene8951	gene8951	gene11151	gene11725								gene8951	724955	LOC724955	KH domain-containing protein akap-1
gene833	gene833	gene7764	gene1801								gene833	409258	LOC409258	eukaryotic translation initiation factor 3 subunit I
gene9466	gene9466	gene2322	gene897								gene9466	552375	LOC552375	NPC intracellular cholesterol transporter 1 isoform X1
gene335	gene335	gene7988	gene4067								gene335	410034	LOC410034	uncharacterized protein LOC410034
gene6497	gene6497	gene456	gene3003								gene6497	107964820	LOC107964820
gene9367	gene9367	gene11353	gene8076								gene9367	100576421	LOC100576421	uncharacterized protein LOC100576421 isoform X3
gene843	gene843	gene6129	gene9615								gene843	100576446	LOC100576446	solute carrier family 26 member 6 isoform X1
gene6298	gene6298	gene12203	gene1395								gene6298	725065	LOC725065	lisH domain-containing protein ARMC9 isoform X1
gene11632	gene11632	gene7507	gene2096								gene11632	100577081	LOC100577081	dihydroorotate dehydrogenase (quinone), mitochondrial
gene2820	gene2820	gene6202	gene475								gene2820	107964222	LOC107964222
gene4194	gene4194	gene4152	gene8338								gene4194	411076	LOC411076	queuosine salvage protein
gene5537	gene5537	gene1839	gene7500								gene5537	725259	Eif4g	eukaryotic translation initiation factor 4 gamma isoform X4
gene2738	gene2738	gene10746	gene11596								gene2738	409640	LOC409640	proton-coupled amino acid transporter-like protein CG1139 isoform X1
gene8117	gene8117	gene6109	gene6677								gene8117	551072	LOC551072	carbonyl reductase
gene6791	gene6791	gene11942	gene11000								gene6791	552431	LOC552431	uncharacterized protein LOC552431 isoform X1
gene11035	gene11035	gene6675	gene8309								gene11035	552815	LOC552815	high mobility group protein 20A
gene4939	gene4939	gene8236	gene1708								gene4939	724655	LOC724655	transmembrane and TPR repeat-containing protein 3
gene2448	gene2448	gene3972	gene5841								gene2448	551442	LOC551442	iron-sulfur protein NUBPL
gene11352	gene11352	gene6789	gene12206								gene11352	726278	LOC726278	synaptic vesicular amine transporter-like
gene6462	gene6462	gene11748	gene8218								gene6462	412115	LOC412115	autophagy-related protein 9A
gene8777	gene8777	gene11931	gene6564								gene8777	100578332	LOC100578332	uncharacterized protein LOC100578332
gene1379	gene1379	gene9312	gene5031								gene1379	409097	MsrA	methionine sulphoxide reductase A isoform X3
gene6693	gene6693	gene12208	gene11471								gene6693	725837	LOC725837	probable ATP-dependent RNA helicase kurz isoform X2
gene11597	gene11597	gene10159	gene8678								gene11597	413478	LOC413478	spermine oxidase
gene6792	gene6792	gene3091	gene79								gene6792	409368	LOC409368	LOW QUALITY PROTEIN: interferon-related developmental regulator 1-like
gene9308	gene9308	gene6122	gene4965								gene9308	727222	LOC727222	serine/threonine-protein phosphatase 4 regulatory subunit 2
gene5190	gene5190	gene9843	gene12119								gene5190	550921	LOC550921	ubiquitin-like protein 3
gene1747	gene1747	gene5108	gene7873								gene1747	551009	LOC551009	protein-glutamate O-methyltransferase isoform X1
gene7008	gene7008	gene1258	gene10706								gene7008	725039	LOC725039	eukaryotic translation initiation factor 4E-binding protein 1
gene5511	gene5511	gene5112	gene10025								gene5511	550930	LOC550930	TGF-beta receptor type-1 isoform X9
gene11942	gene11942	gene1990	gene10641								gene11942	412455	LOC412455	protein shuttle craft
gene5888	gene5888	gene2513	gene693								gene5888	100578020	LOC100578020	uncharacterized protein LOC100578020
gene5611	gene5611	gene2733	gene11718								gene5611	726754	LOC726754	kynurenine formamidase isoform X1
gene4791	gene4791	gene1799	gene4721								gene4791	102655217	LOC102655217	transcription and mRNA export factor ENY2
gene7682	gene7682	gene12209	gene8210								gene7682	411490	LOC411490	probable beta-hexosaminidase fdl isoform X2
gene7730	gene7730	gene11044	gene4750								gene7730	107964972	LOC107964972
gene4745	gene4745	gene3084	gene8443								gene4745	102656864	LOC102656864
gene8986	gene8986	gene6550	gene1393								gene8986	551113	LOC551113	delta-1-pyrroline-5-carboxylate dehydrogenase, mitochondrial
gene4917	gene4917	gene324	gene7965								gene4917	100576233	LOC100576233	uncharacterized protein LOC100576233
gene8325	gene8325	gene5571	gene12199								gene8325	413792	LOC413792	nucleoprotein TPR isoform X2
gene8413	gene8413	gene636	gene5144								gene8413	410190	LOC410190	tyrosine-protein kinase Dnt
gene7713	gene7713	gene166	gene12193								gene7713	100578345	LOC100578345	uncharacterized protein LOC100578345 isoform X1
gene729	gene729	gene8473	gene7920								gene729	551612	LOC551612	FACT complex subunit spt16 isoform X1
gene8629	gene8629	gene9047	gene1202								gene8629	102654166	LOC102654166	trichohyalin isoform X1
gene7278	gene7278	gene5959	gene6821								gene7278	102653713	LOC102653713
gene3459	gene3459	gene8839	gene5515								gene3459	409316	LOC409316	coronin-2B isoform X1
gene744	gene744	gene9831	gene7825								gene744	726918	LOC726918	uncharacterized protein LOC726918
gene1885	gene1885	gene2922	gene8990								gene1885	411871	LOC411871	dual specificity tyrosine-phosphorylation-regulated kinase 2-like
gene684	gene684	gene9352	gene1863								gene684	725817	LOC725817	diphosphomevalonate decarboxylase
gene10460	gene10460	gene9301	gene75								gene10460	102656452	LOC102656452	uncharacterized protein LOC102656452
gene7325	gene7325	gene3934	gene10581								gene7325	102656198	LOC102656198	serine/arginine repetitive matrix protein 1-like
gene9754	gene9754	gene3475	gene691								gene9754	724292	LOC724292	disks large 1 tumor suppressor protein isoform X10
gene3171	gene3171	gene8090	gene4419								gene3171	408726	Cpap3-b	cuticular protein analogous to peritrophins 3-B precursor
gene8794	gene8794	gene1747	gene8910								gene8794	100578061	LOC100578061	late cornified envelope-like proline-rich protein 1
gene4389	gene4389	gene8052	gene11907								gene4389	552512	LOC552512	uncharacterized protein LOC552512 isoform X4
gene11818	gene11818	gene6201	gene1203								gene11818	413078	LOC413078	very-long-chain (3R)-3-hydroxyacyl-CoA dehydratase isoform X1
gene1995	gene1995	gene3370	gene8685								gene1995	408693	LOC408693	epidermal growth factor receptor kinase substrate 8-like protein 1 isoform X3
gene3273	gene3273	gene9304	gene11088								gene3273	726755	LOC726755	pyrokinin-like receptor 2 isoform X1
gene3302	gene3302	gene4307	gene3812								gene3302	412662	LOC412662	programmed cell death 6-interacting protein isoform X2
gene10222	gene10222	gene129	gene7962								gene10222	725290	LOC725290	transcription factor CP2-like protein 1 isoform X1
gene5721	gene5721	gene7019	gene8558								gene5721	410041	LOC410041	uncharacterized protein LOC410041 isoform X1
gene9698	gene9698	gene8907	gene6071								gene9698	412260	LOC412260	serine/threonine-protein kinase SIK3-like isoform X4
gene9894	gene9894	gene461	gene7084								gene9894	551427	LOC551427	erlin-1
gene778	gene778	gene4725	gene2149								gene778	411555	LOC411555	N-acetylneuraminate 9-O-acetyltransferase isoform X5
gene6503	gene6503	gene6227	gene11272								gene6503	726586	LOC726586	ATP-dependent RNA helicase DDX24
gene9432	gene9432	gene6697	gene5950								gene9432	413430	LOC413430	RAC serine/threonine-protein kinase
gene7659	gene7659	gene920	gene3469								gene7659	107964955	LOC107964955
gene2465	gene2465	gene6643	gene1325								gene2465	100577795	LOC100577795	probable serine/threonine-protein kinase DDB_G0282963
gene7595	gene7595	gene840	gene4129								gene7595	100576090	CPR11	cuticular protein 11 precursor
gene6162	gene6162	gene10144	gene5995								gene6162	408915	LOC408915	protein couch potato isoform X7
gene6286	gene6286	gene964	gene6002								gene6286	408956	nanos	protein nanos isoform X2
gene7775	gene7775	gene628	gene8374								gene7775	727349	LOC727349	RNA-binding protein 1 isoform X6
gene6998	gene6998	gene11853	gene10435								gene6998	726007	LOC726007	polycomb protein Scm isoform X2
gene3906	gene3906	gene10291	gene9221								gene3906	408775	LOC408775	heterogeneous nuclear ribonucleoprotein Q isoform X7
gene5942	gene5942	gene4442	gene9718								gene5942	550818	LOC550818	guanine nucleotide-binding protein G(q) subunit alpha isoform X1
gene5641	gene5641	gene10633	gene8530								gene5641	102655611	LOC102655611
gene11742	gene11742	gene1712	gene237								gene11742	726495	LOC726495	protein D2
gene4938	gene4938	gene579	gene409								gene4938	100576637	LOC100576637	trypsin 5G1
gene9322	gene9322	gene6510	gene10534								gene9322	551964	LOC551964	UDP-N-acetylhexosamine pyrophosphorylase
gene75	gene75	gene3324	gene2736								gene75	100576789	LOC100576789	leucine-rich repeat protein SHOC-2 isoform X1
gene6392	gene6392	gene6300	gene11358								gene6392	409196	LOC409196	alanine aminotransferase 1
gene11188	gene11188	gene11283	gene3632								gene11188	107965636	LOC107965636
gene2980	gene2980	gene9568	gene5790								gene2980	100577253	LOC100577253	GRIP and coiled-coil domain-containing protein PFC0235w isoform X2
gene9843	gene9843	gene9299	gene4175								gene9843	551753	LOC551753	RNA polymerase II-associated protein 1
gene4689	gene4689	gene7504	gene10456								gene4689	100576346	LOC100576346	protein PFC0760c
gene801	gene801	gene9128	gene871								gene801	551705	LOC551705	hyccin isoform X1
gene5767	gene5767	gene3250	gene10220								gene5767	449496	JHBP-1	take-out-like carrier protein precursor
gene5004	gene5004	gene4478	gene3784								gene5004	102653657	LOC102653657
gene2718	gene2718	gene12249	gene2327								gene2718	726857	LOC726857	MORN repeat-containing protein 3 isoform X1
gene9478	gene9478	gene9495	gene7516								gene9478	100577364	LOC100577364	FERM, ARHGEF and pleckstrin domain-containing protein 1 isoform X2
gene5142	gene5142	gene11317	gene1534								gene5142	411176	LOC411176	neurotrimin isoform X1
gene5214	gene5214	gene10770	gene12183								gene5214	102654626	LOC102654626	E3 ubiquitin-protein ligase TRIM33 isoform X1
gene11724	gene11724	gene4817	gene740								gene11724	726250	LOC726250	cilia- and flagella-associated protein 43-like isoform X1
gene8038	gene8038	gene2106	gene4247								gene8038	726063	LOC726063	zinc finger protein 569
gene10564	gene10564	gene9053	gene10855								gene10564	552726	LOC552726	40S ribosomal protein S18
gene829	gene829	gene9051	gene3168								gene829	552040	LOC552040	uncharacterized protein LOC552040 isoform X1
gene4289	gene4289	gene3459	gene1371								gene4289	726318	LOC726318	UPF0676 protein C1494.01
gene2670	gene2670	gene5206	gene2894								gene2670	102656822	LOC102656822	uncharacterized protein LOC102656822 isoform X1
gene3213	gene3213	gene10185	gene1884								gene3213	726188	LOC726188	uncharacterized protein LOC726188 isoform X4
gene6411	gene6411	gene2919	gene2611								gene6411	409150	LOC409150	probable enoyl-CoA hydratase, mitochondrial
gene11098	gene11098	gene12202	gene8873								gene11098	408493	LOC408493	uncharacterized protein LOC408493
gene6553	gene6553	gene7954	gene10401								gene6553	411630	LOC411630	ribosomal protein S6 kinase alpha-5 isoform X3
gene759	gene759	gene11953	gene4588								gene759	551976	LOC551976	calcium-binding mitochondrial carrier protein SCaMC-2 isoform X2
gene9746	gene9746	gene9330	gene4959								gene9746	724142	LOC724142	60S ribosomal protein L24 isoform X1
gene6607	gene6607	gene3955	gene9295								gene6607	411255	LOC411255	thioredoxin domain-containing protein
gene12144	gene12144	gene5963	gene3682								gene12144	102655864	LOC102655864
gene2736	gene2736	gene8976	gene2094								gene2736	107964196	LOC107964196
gene10497	gene10497	gene1500	gene8232								gene10497	724463	LOC724463	PI-PLC X domain-containing protein 3
gene10892	gene10892	gene10731	gene2921								gene10892	100578563	LOC100578563	putative uncharacterized protein DDB_G0286901 isoform X1
gene8774	gene8774	gene668	gene7282								gene8774	552348	LOC552348	methyltransferase-like protein 23
gene2950	gene2950	gene7369	gene7987								gene2950	408741	LOC408741	ras-related protein Rab-37 isoform X1
gene4453	gene4453	gene698	gene4377								gene4453	726497	LOC726497	autophagy-related protein 2 homolog B isoform X2
gene8922	gene8922	gene4665	gene2724								gene8922	412832	LOC412832	structural maintenance of chromosomes protein 2
gene743	gene743	gene1134	gene10475								gene743	552371	LOC552371	ATP-binding cassette sub-family G member 1 isoform X1
gene5991	gene5991	gene6230	gene3310								gene5991	726134	LOC726134	carboxylesterase
gene5704	gene5704	gene2427	gene2898								gene5704	410013	LOC410013	calexcitin-2
gene9076	gene9076	gene10929	gene4907								gene9076	410336	LOC410336	dipeptidyl aminopeptidase-like protein 6 isoform X2
gene4402	gene4402	gene10904	gene7906								gene4402	412378	LOC412378	uncharacterized protein LOC412378
gene822	gene822	gene9417	gene9521								gene822	551031	LOC551031	uncharacterized protein LOC551031
gene3935	gene3935	gene808	gene4933								gene3935	102656131	LOC102656131	biogenesis of lysosome-related organelles complex 1 subunit 2
gene5038	gene5038	gene6981	gene10992								gene5038	100578454	LOC100578454
gene10345	gene10345	gene10814	gene8748								gene10345	102656433	LOC102656433	uncharacterized protein LOC102656433
gene10284	gene10284	gene2147	gene11980								gene10284	410434	LOC410434	splicing factor 3B subunit 4
gene11687	gene11687	gene3973	gene1064								gene11687	100578580	LOC100578580	guanine nucleotide exchange factor MSS4 homolog
gene5499	gene5499	gene2209	gene86								gene5499	102655635	LOC102655635
gene3039	gene3039	gene11695	gene7406								gene3039	413791	LOC413791	TBC1 domain family member 24 isoform X4
gene11136	gene11136	gene9563	gene1069								gene11136	410565	LOC410565	cullin-1
gene9313	gene9313	gene4830	gene9407								gene9313	552714	LOC552714	conserved oligomeric Golgi complex subunit 2
gene6157	gene6157	gene6907	gene7629								gene6157	724757	LOC724757	histone H4
gene12203	gene12203	gene11153	gene10630								gene12203	552113	LOC552113	long-chain fatty acid transport protein 4 isoform X1
gene2192	gene2192	gene591	gene11751								gene2192	552073	LOC552073	arylsulfatase B
gene4242	gene4242	gene4010	gene171								gene4242	100578215	LOC100578215	uncharacterized protein LOC100578215 isoform X2
gene3458	gene3458	gene8551	gene3195								gene3458	725645	LOC725645	uncharacterized protein LOC725645 isoform X1
gene2878	gene2878	gene6395	gene2328								gene2878	410936	LOC410936	cytochrome b5 reductase 4 isoform X1
gene11230	gene11230	gene9236	gene11916								gene11230	726528	LOC726528	nuclear factor interleukin-3-regulated protein
gene9943	gene9943	gene1193	gene9088								gene9943	102653706	LOC102653706
gene7002	gene7002	gene5014	gene6169								gene7002	100576975	LOC100576975	zinc finger protein 567
gene5171	gene5171	gene7473	gene4180								gene5171	100578461	LOC100578461
gene11307	gene11307	gene6462	gene2174								gene11307	550659	LOC550659	adiponectin receptor protein
gene6636	gene6636	gene629	gene5938								gene6636	409770	LOC409770	probable tubulin polyglutamylase TTLL1
gene341	gene341	gene663	gene5517								gene341	413693	LOC413693	cilia- and flagella-associated protein 251
gene7596	gene7596	gene9487	gene1854								gene7596	725710	LOC725710	D-beta-hydroxybutyrate dehydrogenase, mitochondrial
gene9036	gene9036	gene10053	gene2780								gene9036	410323	LOC410323	dynein heavy chain 7, axonemal isoform X3
gene11203	gene11203	gene7395	gene6638								gene11203	102654708	LOC102654708	transcription initiation protein SPT3 homolog isoform X1
gene2869	gene2869	gene677	gene9477								gene2869	725698	LOC725698	uncharacterized protein LOC725698
gene5857	gene5857	gene3981	gene7428								gene5857	724704	LOC724704	cytoplasmic polyadenylation element-binding protein 2
gene4466	gene4466	gene3036	gene9943								gene4466	411103	LOC411103	putative 28S ribosomal protein S5, mitochondrial isoform X2
gene1736	gene1736	gene101	gene1978								gene1736	724274	LOC724274	protein lethal(2)essential for life
gene4079	gene4079	gene3742	gene9662								gene4079	551459	LOC551459	protein YIF1B
gene8860	gene8860	gene4023	gene1970								gene8860	100577455	LOC100577455	golgin subfamily A member 6-like protein 22
gene2159	gene2159	gene4239	gene904								gene2159	725758	LOC725758	regulator of G-protein signaling 7-binding protein A
gene7817	gene7817	gene5943	gene10784								gene7817	102656182	LOC102656182
gene11085	gene11085	gene4700	gene12126								gene11085	113219244	LOC113219244	zinc finger protein 346-like
gene8224	gene8224	gene1284	gene6378								gene8224	550791	LOC550791	arrestin homolog
gene897	gene897	gene9382	gene10957								gene897	411983	LOC411983	uncharacterized protein LOC411983
gene6590	gene6590	gene8088	gene2230								gene6590	411248	LOC411248	uncharacterized protein LOC411248 isoform X1
gene10684	gene10684	gene2900	gene10391								gene10684	724550	LOC724550	iduronate 2-sulfatase isoform X1
gene5304	gene5304	gene2277	gene9863								gene5304	551046	LOC551046	glycine receptor subunit alpha-4 isoform X2
gene1026	gene1026	gene6869	gene10224								gene1026	410021	LOC410021	protein Skeletor, isoforms B/C isoform X1
gene6507	gene6507	gene8288	gene5731								gene6507	725573	LOC725573	uncharacterized protein LOC725573
gene9000	gene9000	gene8986	gene4936								gene9000	107965274	LOC107965274
gene953	gene953	gene7114	gene3164								gene953	412918	LOC412918	protein SON-like isoform X1
gene12135	gene12135	gene8160	gene1979								gene12135	551686	LOC551686	apoptosis inhibitor 5
gene3322	gene3322	gene6104	gene7262								gene3322	102653946	LOC102653946
gene3892	gene3892	gene6545	gene3447								gene3892	102655409	LOC102655409
gene1474	gene1474	gene8829	gene1821								gene1474	412220	LOC412220	sialin isoform X2
gene5968	gene5968	gene6663	gene4130								gene5968	409125	LOC409125	mitogen-activated protein kinase kinase kinase 4
gene1134	gene1134	gene6640	gene10483								gene1134	551762	LOC551762	S-adenosylhomocysteine hydrolase-like protein 1 isoform X1
gene9603	gene9603	gene10930	gene615								gene9603	100577559	LOC100577559
gene8786	gene8786	gene7003	gene5396								gene8786	102655440	LOC102655440	uncharacterized protein LOC102655440
gene11908	gene11908	gene5624	gene2012								gene11908	100576563	LOC100576563	growth factor receptor-bound protein 14 isoform X2
gene8500	gene8500	gene11119	gene730								gene8500	410177	LOC410177	phosphatidylglycerophosphatase and protein-tyrosine phosphatase 1 isoform X2
gene7003	gene7003	gene3335	gene11802								gene7003	727634	LOC727634	activating molecule in BECN1-regulated autophagy protein 1 isoform X2
gene6146	gene6146	gene7087	gene8746								gene6146	413362	LOC413362	ATP-dependent DNA helicase Q1-like
gene6037	gene6037	gene6658	gene10631								gene6037	551898	LOC551898	tetraspanin-5 isoform X1
gene487	gene487	gene8098	gene8404								gene487	550645	LOC550645	mucin-5AC isoform X3
gene9276	gene9276	gene3887	gene11164								gene9276	724460	LOC724460	uncharacterized protein LOC724460 isoform X1
gene2513	gene2513	gene2546	gene1975								gene2513	552234	LOC552234	surfeit locus protein 4 homolog
gene9088	gene9088	gene4017	gene2037								gene9088	107964020	LOC107964020	alpha-tocopherol transfer protein isoform X2
gene9091	gene9091	gene8015	gene9062								gene9091	408365	LOC408365	uncharacterized protein LOC408365 isoform X1
gene2861	gene2861	gene6817	gene10039								gene2861	102654331	LOC102654331	tubulin polyglutamylase TTLL4-like
gene7097	gene7097	gene2676	gene2804								gene7097	100576760	LOC100576760	uncharacterized protein LOC100576760 isoform X1
gene4717	gene4717	gene3904	gene4084								gene4717	724927	LOC724927	importin-5
gene4857	gene4857	gene11785	gene5693								gene4857	552115	LOC552115	12 kDa FK506-binding protein
gene6779	gene6779	gene8728	gene5589								gene6779	113218928	LOC113218928
gene3009	gene3009	gene8257	gene7241								gene3009	410094	LOC410094	protein RER1 isoform X3
gene2569	gene2569	gene4414	gene4018								gene2569	102654687	LOC102654687
gene793	gene793	gene10760	gene887								gene793	102655515	LOC102655515
gene3476	gene3476	gene2162	gene3300								gene3476	726176	LOC726176	dynein light chain roadblock-type 2
gene6604	gene6604	gene10738	gene9951								gene6604	725765	LOC725765	uncharacterized protein LOC725765 isoform X1
gene582	gene582	gene2340	gene11994								gene582	409927	LOC409927	putative pyridoxal-dependent decarboxylase domain-containing protein 2 isoform X2
gene10659	gene10659	gene8126	gene7554								gene10659	102653655	LOC102653655	mucin-19
gene9355	gene9355	gene4005	gene6295								gene9355	411554	LOC411554	RCC1-like G exchanging factor-like protein isoform X1
gene10039	gene10039	gene9765	gene491								gene10039	113219144	LOC113219144
gene1154	gene1154	gene5793	gene8073								gene1154	102656224	LOC102656224	uncharacterized protein LOC102656224
gene9385	gene9385	gene7883	gene5603								gene9385	409307	LOC409307	uncharacterized protein LOC409307
gene6639	gene6639	gene6134	gene10754								gene6639	409769	LOC409769	uncharacterized protein LOC409769
gene8541	gene8541	gene11954	gene2397								gene8541	413310	LOC413310	F-actin-monooxygenase Mical isoform X5
gene9501	gene9501	gene9428	gene9094								gene9501	107965261	LOC107965261
gene11175	gene11175	gene7807	gene3288								gene11175	100576799	LOC100576799	uncharacterized protein LOC100576799
gene2257	gene2257	gene233	gene10347								gene2257	410837	LOC410837	microsomal glutathione S-transferase 1
gene2094	gene2094	gene7935	gene1286								gene2094	100578144	LOC100578144	mitotic apparatus protein p62
gene4830	gene4830	gene5020	gene2861								gene4830	409724	LOC409724	ADP-ribosylation factor-binding protein GGA3 isoform X2
gene2601	gene2601	gene4238	gene6367								gene2601	411564	LOC411564	nose resistant to fluoxetine protein 6 isoform X1
gene2102	gene2102	gene4832	gene790								gene2102	410856	LOC410856	28S ribosomal protein S29, mitochondrial isoform X1
gene9489	gene9489	gene1903	gene9950								gene9489	100577449	LOC100577449	PMS1 protein homolog 1
gene2158	gene2158	gene5821	gene9408								gene2158	409236	LOC409236	ATP synthase subunit O, mitochondrial
gene9622	gene9622	gene1594	gene291								gene9622	412148	LOC412148	ras suppressor protein 1 isoform X2
gene1767	gene1767	gene4398	gene8916								gene1767	107964042	LOC107964042
gene701	gene701	gene4404	gene6307								gene701	100578016	LOC100578016
gene2789	gene2789	gene8872	gene2815								gene2789	102655862	LOC102655862
gene1249	gene1249	gene3720	gene6177								gene1249	551158	LOC551158	28S ribosomal protein S17, mitochondrial
gene11339	gene11339	gene8140	gene2664								gene11339	113219282	LOC113219282
gene6633	gene6633	gene5823	gene10225								gene6633	409771	LOC409771	potassium channel subfamily K member 18 isoform X2
gene10389	gene10389	gene4803	gene524								gene10389	410463	LOC410463	ATPase WRNIP1
gene4684	gene4684	gene10184	gene6248								gene4684	113218759	LOC113218759	uncharacterized protein LOC113218759
gene1044	gene1044	gene7901	gene5869								gene1044	100577019	LOC100577019	protein quiver isoform X1
gene892	gene892	gene9706	gene11744								gene892	726238	LOC726238	voltage-gated potassium channel subunit beta-2 isoform X1
gene2369	gene2369	gene6459	gene5188								gene2369	100577927	LOC100577927	polynucleotide 5\\'-hydroxyl-kinase NOL9 isoform X1
gene6320	gene6320	gene631	gene9870								gene6320	725368	LOC725368	probable serine/threonine-protein kinase DDB_G0283337
gene7342	gene7342	gene8180	gene6495								gene7342	726137	LOC726137	male-specific lethal 3 homolog isoform X1
gene5310	gene5310	gene132	gene10886								gene5310	100578875	LOC100578875	beta-1,4-mannosyl-glycoprotein 4-beta-N-acetylglucosaminyltransferase
gene5805	gene5805	gene6137	gene2775								gene5805	413637	LOC413637	F-box/SPRY domain-containing protein 1 isoform X1
gene4165	gene4165	gene5286	gene6039								gene4165	411062	LOC411062	cyclin-K
gene2716	gene2716	gene6513	gene12373								gene2716	552551	LOC552551	small integral membrane protein 14
gene2379	gene2379	gene6010	gene8044								gene2379	413787	LOC413787	tetratricopeptide repeat protein 39B isoform X2
gene4900	gene4900	gene929	gene1982								gene4900	113218844	LOC113218844
gene2863	gene2863	gene151	gene3199								gene2863	410045	LOC410045	serine/threonine-protein phosphatase 4 regulatory subunit 4 isoform X2
gene7851	gene7851	gene728	gene873								gene7851	408306	LOC408306	sodium/hydrogen exchanger 3 isoform X1
gene6175	gene6175	gene1584	gene11142								gene6175	100577159	LOC100577159	uncharacterized protein LOC100577159 isoform X2
gene950	gene950	gene1714	gene10747								gene950	726218	LOC726218	acetyl-CoA acetyltransferase, mitochondrial
gene663	gene663	gene7725	gene4584								gene663	409102	LOC409102	tRNA-dihydrouridine(16/17) synthase
gene11263	gene11263	gene11037	gene12070								gene11263	552757	LOC552757	probable peroxisomal acyl-coenzyme A oxidase 1
gene1396	gene1396	gene7426	gene2562								gene1396	104794347	Mir6053
gene10375	gene10375	gene2856	gene3737								gene10375	726710	Dll	distal-less isoform X1
gene11715	gene11715	gene7126	gene2532								gene11715	726126	LOC726126	proclotting enzyme
gene9664	gene9664	gene1140	gene393								gene9664	100576919	LOC100576919	uncharacterized protein LOC100576919
gene566	gene566	gene9875	gene4450								gene566	412588	LOC412588	tyrosine-protein kinase Src42A isoform X2
gene7560	gene7560	gene3791	gene8259								gene7560	724358	LOC724358	uncharacterized protein LOC724358 isoform X3
gene9772	gene9772	gene11568	gene7045								gene9772	102656043	LOC102656043
gene6012	gene6012	gene7145	gene3283								gene6012	409933	LOC409933	glucose transporter type 1 isoform X15
gene7381	gene7381	gene3897	gene2633								gene7381	409602	LOC409602	circadian clock-controlled protein
gene8320	gene8320	gene6592	gene1592								gene8320	727298	LOC727298	intraflagellar transport protein 122 homolog
gene8071	gene8071	gene2700	gene3322								gene8071	408302	LOC408302	solute carrier family 22 member 21
gene5838	gene5838	gene9334	gene8081								gene5838	412681	LOC412681	dipeptidyl peptidase 9
gene2255	gene2255	gene9241	gene2564								gene2255	408677	LOC408677	uncharacterized protein LOC408677 isoform X6
gene6898	gene6898	gene6546	gene7918								gene6898	726953	LOC726953	secretin receptor isoform X3
gene1710	gene1710	gene6067	gene9816								gene1710	113218583	LOC113218583
gene4591	gene4591	gene11613	gene3865								gene4591	408850	LOC408850	pre-mRNA-processing factor 39
gene591	gene591	gene9316	gene1053								gene591	413468	LOC413468	potential E3 ubiquitin-protein ligase ariadne-1
gene9329	gene9329	gene3338	gene12244								gene9329	409636	LOC409636	uncharacterized protein LOC409636 isoform X1
gene101	gene101	gene2752	gene2569								gene101	725306	LOC725306	TATA-binding protein-associated factor 172 isoform X2
gene3218	gene3218	gene10574	gene1894								gene3218	408721	LOC408721	neurocalcin homolog
gene926	gene926	gene4788	gene9476								gene926	726320	LOC726320	serine protease inhibitor 27A isoform X1
gene8878	gene8878	gene7069	gene10854								gene8878	411614	LOC411614	RYamide receptor
gene7114	gene7114	gene11014	gene2114								gene7114	411237	LOC411237	UPF0505 protein C16orf62 homolog
gene8069	gene8069	gene7409	gene3158								gene8069	552144	LOC552144	major facilitator superfamily domain-containing protein 8 isoform X1
gene109	gene109	gene3357	gene3299								gene109	411665	LOC411665	heparan sulfate 2-O-sulfotransferase pipe isoform X2
gene9788	gene9788	gene7135	gene11966								gene9788	107965335	LOC107965335
gene396	gene396	gene6417	gene3181								gene396	552187	LOC552187	leucine-rich repeat-containing protein 4
gene4884	gene4884	gene3014	gene6398								gene4884	552266	LOC552266	40S ribosomal protein S12
gene6201	gene6201	gene9666	gene5849								gene6201	411696	LOC411696	GDP-mannose 4,6 dehydratase isoform X2
gene5570	gene5570	gene8891	gene7079								gene5570	411865	LOC411865	exportin-2
[truncated: 7,760 more rows]
[truncated: 17 more columns]
