# Supplementary material for: Individual differences in honey bee behavior enabled by plasticity in brain gene regulatory networks
Source: bioRxiv preprint, doi:10.1101/2020.09.09.289272, version 2 (2020-12-12)
Supplement: Supplemental File 4 [file 289272_file06.xlsx]

## Sheet: Sheet1
Universe	FvsL	F>L	L>F	FvsG	F>G	G>F	GvsL	G>L	L>G		peak	chr	center	region	gene		F vs. L DAPs, GO enrichment results						F>L DAPs, GO enrichment results						L>F DAPs, GO enrichment results						F vs. G DAPs, GO enrichment results		G vs. L DAPs, GO enrichment results						G>L DAPs, GO enrichment results						L>G DAPs, GO enrichment results
peak6666	peak6666	peak6666	peak1644				peak6167	peak6167	peak1764		peak1	NC_001566.1	8172	upstream	gene12372
peak8097	peak8097	peak8097	peak8334				peak2529	peak2529			peak2	NC_037638.1	10798	five_utr	gene1		GO term	Description	P-value	FDR q-value	Enrichment (N, B, n, b)		GO term	Description	P-value	FDR q-value	Enrichment (N, B, n, b)		GO term	Description	P-value	FDR q-value	Enrichment (N, B, n, b)		NO DAPs		GO term	Description	P-value	FDR q-value	Enrichment (N, B, n, b)		GO term	Description	P-value	FDR q-value	Enrichment (N, B, n, b)		NO DAPs
peak3049	peak3049	peak3049	peak5400				peak6183	peak6183			peak3	NC_037638.1	12398	promoter	gene0		GO:0050794	regulation of cellular process	7.42e-11	4.43e-07	1.22 (3050,1389,754,420)		GO:0009653	anatomical structure morphogenesis	1.92e-13	1.15e-09	1.87 (3050,424,434,113)		GO:0065007	biological regulation	0.000291	1	1.15 (3050,1616,403,246)				GO:0016203	muscle attachment	0.000795	1	45.07 (3065,17,8,2)		GO:0016203	muscle attachment	0.000795	1	45.07 (3065,17,8,2)
peak6655	peak6655	peak6655	peak4825				peak9710	peak9710			peak4	NC_037638.1	30784	five_utr	gene4		GO:0050789	regulation of biological process	5.77e-10	1.72e-06	1.20 (3050,1485,754,440)		GO:0050794	regulation of cellular process	1.8e-12	5.37e-09	1.34 (3050,1389,434,265)		GO:0042026	protein refolding	0.000657	1	5.41 (3050,7,403,5)
peak8063	peak8063	peak8063	peak8021				peak1337	peak1337			peak5	NC_037638.1	31658	promoter	gene4		GO:0032501	multicellular organismal process	8.47e-10	1.69e-06	1.39 (3050,627,754,215)		GO:0032502	developmental process	3.76e-11	7.49e-08	1.47 (3050,897,434,187)		GO:0030308	negative regulation of cell growth	0.000675	1	4.54 (3050,10,403,6)
peak1598	peak1598	peak1598	peak5468				peak2557	peak2557			peak6	NC_037638.1	45878	five_utr	gene8		GO:0065007	biological regulation	2.78e-09	4.14e-06	1.17 (3050,1616,754,469)		GO:0032501	multicellular organismal process	7.7e-11	1.15e-07	1.59 (3050,627,434,142)		GO:0008407	chaeta morphogenesis	0.000761	1	3.24 (3050,21,403,9)
peak1368	peak1368	peak1368	peak2585				peak10349	peak10349			peak7	NC_037638.1	47476	five_utr	gene8		GO:0032502	developmental process	1.03e-08	1.24e-05	1.28 (3050,897,754,284)		GO:0048856	anatomical structure development	8.46e-11	1.01e-07	1.60 (3050,610,434,139)		GO:0050896	response to stimulus	0.000779	0.931	1.35 (3050,499,403,89)
peak6137	peak6137	peak6137	peak9036				peak6583	peak6583			peak8	NC_037638.1	55326	intron	gene8		GO:0010646	regulation of cell communication	2.6e-08	2.59e-05	1.44 (3050,432,754,154)		GO:0051239	regulation of multicellular organismal process	2.73e-10	2.72e-07	1.81 (3050,364,434,94)		GO:0050789	regulation of biological process	0.000862	0.857	1.15 (3050,1485,403,226)
peak6605	peak6605	peak6605	peak4187				peak9757	peak9757			peak9	NC_037638.1	57128	intron	gene8		GO:0023051	regulation of signaling	2.6e-08	2.22e-05	1.44 (3050,432,754,154)		GO:0048869	cellular developmental process	2.76e-10	2.35e-07	1.68 (3050,480,434,115)		GO:0010468	regulation of gene expression	0.000907	0.774	1.31 (3050,603,403,104)
peak1719	peak1719	peak1719	peak2743				peak10581	peak10581			peak10	NC_037638.1	63541	intron	gene8		GO:0007411	axon guidance	3.59e-08	2.68e-05	1.81 (3050,150,754,67)		GO:0048523	negative regulation of cellular process	5.53e-10	4.13e-07	1.63 (3050,525,434,122)
peak10097	peak10097	peak10097	peak1224				peak3088	peak3088			peak11	NC_037638.1	72676	intron	gene8		GO:0048519	negative regulation of biological process	3.76e-08	2.49e-05	1.36 (3050,600,754,201)		GO:0050789	regulation of biological process	7.08e-10	4.7e-07	1.28 (3050,1485,434,270)
peak11123	peak11123	peak11123	peak9410				peak4127	peak4127			peak12	NC_037638.1	78740	three_utr	gene8		GO:0048523	negative regulation of cellular process	6.68e-08	3.99e-05	1.38 (3050,525,754,179)		GO:0007411	axon guidance	9.1e-10	5.44e-07	2.34 (3050,150,434,50)
peak2819	peak2819	peak2819	peak8368				peak9916	peak9916			peak13	NC_037638.1	89793	upstream	gene10		GO:0097485	neuron projection guidance	9.24e-08	5.02e-05	1.76 (3050,156,754,68)		GO:0048513	animal organ development	1.15e-09	6.22e-07	1.89 (3050,293,434,79)
peak2714	peak2714	peak2714	peak6053				peak7944	peak7944			peak14	NC_037638.1	92796	exon	gene11		GO:0009653	anatomical structure morphogenesis	2.54e-07	0.000126	1.41 (3050,424,754,148)		GO:0010646	regulation of cell communication	2.04e-09	1.01e-06	1.69 (3050,432,434,104)
peak4906	peak4906	peak4906	peak7661				peak9604	peak9604			peak15	NC_037638.1	103254	intron	gene11		GO:0006928	movement of cell or subcellular component	4.21e-07	0.000194	1.48 (3050,317,754,116)		GO:0023051	regulation of signaling	2.04e-09	9.37e-07	1.69 (3050,432,434,104)
peak5623	peak5623	peak5623	peak5565				peak1764				peak16	NC_037638.1	149776	intron	gene18		GO:0030154	cell differentiation	4.57e-07	0.000195	1.78 (3050,134,754,59)		GO:2000026	regulation of multicellular organismal development	2.88e-09	1.23e-06	1.87 (3050,293,434,78)
peak4563	peak4563	peak4563	peak8375								peak17	NC_037638.1	158040	intron	gene18		GO:0009887	animal organ morphogenesis	5.35e-07	0.000213	1.70 (3050,162,754,68)		GO:0050793	regulation of developmental process	4.19e-09	1.67e-06	1.77 (3050,354,434,89)
peak140	peak140	peak140	peak7028								peak18	NC_037638.1	160048	intron	gene18		GO:0048513	animal organ development	7.48e-07	0.000279	1.49 (3050,293,754,108)		GO:0097485	neuron projection guidance	4.24e-09	1.58e-06	2.25 (3050,156,434,50)
peak8397	peak8397	peak8397	peak948								peak19	NC_037638.1	164125	intron	gene18		GO:0048856	anatomical structure development	2.15e-06	0.000756	1.30 (3050,610,754,196)		GO:0030154	cell differentiation	1.72e-08	6.05e-06	2.31 (3050,134,434,44)
peak139	peak139	peak139	peak7352								peak20	NC_037638.1	164710	intron	gene18		GO:0048869	cellular developmental process	2.22e-06	0.000736	1.35 (3050,480,754,160)		GO:0065007	biological regulation	3.4e-08	1.13e-05	1.23 (3050,1616,434,282)
peak1497	peak1497	peak1497	peak7013								peak21	NC_037638.1	169830	intron	gene18		GO:0099177	regulation of trans-synaptic signaling	3.73e-06	0.00117	1.99 (3050,73,754,36)		GO:0099177	regulation of trans-synaptic signaling	5.06e-08	1.59e-05	2.79 (3050,73,434,29)
peak8991	peak8991	peak8991	peak3459								peak22	NC_037638.1	174343	intron	gene18		GO:0050804	modulation of chemical synaptic transmission	3.73e-06	0.00111	1.99 (3050,73,754,36)		GO:0050804	modulation of chemical synaptic transmission	5.06e-08	1.51e-05	2.79 (3050,73,434,29)
peak3134	peak3134	peak3134	peak1527								peak23	NC_037638.1	175666	intron	gene18		GO:0010648	negative regulation of cell communication	3.96e-06	0.00112	1.61 (3050,176,754,70)		GO:0009887	animal organ morphogenesis	5.17e-08	1.47e-05	2.13 (3050,162,434,49)
peak2529	peak2529	peak2529	peak8816								peak24	NC_037638.1	180955	intron	gene18		GO:0023057	negative regulation of signaling	5.03e-06	0.00136	1.60 (3050,177,754,70)		GO:0048519	negative regulation of biological process	6.74e-08	1.83e-05	1.50 (3050,600,434,128)
peak5510	peak5510	peak5510	peak4175								peak25	NC_037638.1	190859	intron	gene18		GO:0006355	regulation of transcription, DNA-templated	5.43e-06	0.00141	1.35 (3050,454,754,151)		GO:0007610	behavior	7.93e-08	2.06e-05	1.89 (3050,234,434,63)
peak5383	peak5383	peak5383	peak5477								peak26	NC_037638.1	203416	intron	gene18		GO:2001141	regulation of RNA biosynthetic process	5.43e-06	0.00135	1.35 (3050,454,754,151)		GO:0007155	cell adhesion	1.44e-07	3.59e-05	2.68 (3050,76,434,29)
peak8861	peak8861	peak8861	peak10172								peak27	NC_037638.1	205498	intron	gene18		GO:1903506	regulation of nucleic acid-templated transcription	5.43e-06	0.0013	1.35 (3050,454,754,151)		GO:0010558	negative regulation of macromolecule biosynthetic process	1.91e-07	4.57e-05	2.01 (3050,178,434,51)
peak6276	peak6276	peak6276	peak8378								peak28	NC_037638.1	208576	intron	gene18		GO:0007423	sensory organ development	7.62e-06	0.00175	1.75 (3050,113,754,49)		GO:2000113	negative regulation of cellular macromolecule biosynthetic process	1.91e-07	4.39e-05	2.01 (3050,178,434,51)
peak6028	peak6028	peak6028	peak6214								peak29	NC_037638.1	224064	intron	gene18		GO:0051252	regulation of RNA metabolic process	1.16e-05	0.00257	1.31 (3050,499,754,162)		GO:0009890	negative regulation of biosynthetic process	1.92e-07	4.26e-05	2.00 (3050,183,434,52)
peak3984	peak3984	peak3984	peak2319								peak30	NC_037638.1	229760	intron	gene18		GO:0007476	imaginal disc-derived wing morphogenesis	1.66e-05	0.00354	1.91 (3050,74,754,35)		GO:0031327	negative regulation of cellular biosynthetic process	1.92e-07	4.1e-05	2.00 (3050,183,434,52)
peak3243	peak3243	peak3243	peak5252								peak31	NC_037638.1	230996	intron	gene18		GO:0009968	negative regulation of signal transduction	1.73e-05	0.00356	1.59 (3050,163,754,64)		GO:0022610	biological adhesion	2.01e-07	4.15e-05	2.65 (3050,77,434,29)
peak3073	peak3073	peak3073	peak10509								peak32	NC_037638.1	233159	intron	gene18		GO:0009966	regulation of signal transduction	2.44e-05	0.00485	1.36 (3050,372,754,125)		GO:0007423	sensory organ development	2.78e-07	5.53e-05	2.30 (3050,113,434,37)
peak9931	peak9931	peak9931	peak7421								peak33	NC_037638.1	236091	intron	gene18		GO:0031326	regulation of cellular biosynthetic process	2.6e-05	0.005	1.29 (3050,538,754,171)		GO:0007476	imaginal disc-derived wing morphogenesis	2.94e-07	5.67e-05	2.66 (3050,74,434,28)
peak423	peak423	peak423	peak8341								peak34	NC_037638.1	240143	intron	gene18		GO:1902679	negative regulation of RNA biosynthetic process	2.78e-05	0.00518	1.60 (3050,149,754,59)		GO:0006355	regulation of transcription, DNA-templated	3.29e-07	6.15e-05	1.56 (3050,454,434,101)
peak958	peak958	peak958	peak6366								peak35	NC_037638.1	241030	intron	gene18		GO:0045892	negative regulation of transcription, DNA-templated	2.78e-05	0.00503	1.60 (3050,149,754,59)		GO:2001141	regulation of RNA biosynthetic process	3.29e-07	5.96e-05	1.56 (3050,454,434,101)
peak6167	peak6167	peak6167	peak5301								peak36	NC_037638.1	246762	promoter	gene26		GO:1903507	negative regulation of nucleic acid-templated transcription	2.78e-05	0.00488	1.60 (3050,149,754,59)		GO:1903506	regulation of nucleic acid-templated transcription	3.29e-07	5.79e-05	1.56 (3050,454,434,101)
peak6552	peak6552	peak6552	peak1267								peak37	NC_037638.1	265946	intron	gene27		GO:0009889	regulation of biosynthetic process	2.93e-05	0.00501	1.28 (3050,539,754,171)		GO:0010648	negative regulation of cell communication	3.42e-07	5.83e-05	2.00 (3050,176,434,50)
peak10164	peak10164	peak10164	peak1584								peak38	NC_037638.1	269659	intron	gene27		GO:0019219	regulation of nucleobase-containing compound metabolic process	3.29e-05	0.00546	1.29 (3050,518,754,165)		GO:0035114	imaginal disc-derived appendage morphogenesis	3.64e-07	6.04e-05	2.34 (3050,105,434,35)
peak9837	peak9837	peak9837	peak894								peak39	NC_037638.1	289350	intron	gene27		GO:0007155	cell adhesion	3.41e-05	0.0055	1.86 (3050,76,754,35)		GO:0009886	post-embryonic animal morphogenesis	3.96e-07	6.39e-05	1.91 (3050,202,434,55)
peak1392	peak1392	peak1392	peak7374								peak40	NC_037638.1	366301	intron	gene27		GO:0010468	regulation of gene expression	3.46e-05	0.00544	1.26 (3050,603,754,188)		GO:0023057	negative regulation of signaling	4.15e-07	6.52e-05	1.99 (3050,177,434,50)
peak2453	peak2453	peak2453	peak9125								peak41	NC_037638.1	409291	five_utr	gene30		GO:0051239	regulation of multicellular organismal process	3.57e-05	0.00546	1.36 (3050,364,754,122)		GO:0048731	system development	4.39e-07	6.72e-05	2.11 (3050,143,434,43)
peak10993	peak10993	peak10993	peak432								peak42	NC_037638.1	424331	intron	gene31		GO:0050793	regulation of developmental process	3.89e-05	0.00581	1.36 (3050,354,754,119)		GO:0008045	motor neuron axon guidance	4.92e-07	7.34e-05	3.19 (3050,44,434,20)
peak1494	peak1494	peak1494	peak7197								peak43	NC_037638.1	425116	intron	gene31		GO:0010556	regulation of macromolecule biosynthetic process	4.21e-05	0.00613	1.28 (3050,520,754,165)		GO:0051252	regulation of RNA metabolic process	5.12e-07	7.46e-05	1.52 (3050,499,434,108)
peak6183	peak6183	peak6183	peak4150								peak44	NC_037638.1	435880	intron	gene31		GO:0006357	regulation of transcription by RNA polymerase II	4.56e-05	0.00649	1.39 (3050,306,754,105)		GO:0006928	movement of cell or subcellular component	6.28e-07	8.93e-05	1.68 (3050,317,434,76)
peak2377	peak2377	peak2377	peak5968								peak45	NC_037638.1	447636	promoter	gene33		GO:0022610	biological adhesion	4.8e-05	0.00666	1.84 (3050,77,754,35)		GO:0006357	regulation of transcription by RNA polymerase II	6.31e-07	8.77e-05	1.70 (3050,306,434,74)
peak6318	peak6318	peak6318	peak1953								peak46	NC_037638.1	451909	intron	gene31		GO:2000112	regulation of cellular macromolecule biosynthetic process	5.15e-05	0.00699	1.28 (3050,518,754,164)		GO:0010556	regulation of macromolecule biosynthetic process	7.21e-07	9.78e-05	1.50 (3050,520,434,111)
peak9710	peak9710	peak9710	peak6528								peak47	NC_037638.1	455719	intron	gene31		GO:0051253	negative regulation of RNA metabolic process	5.28e-05	0.007	1.57 (3050,155,754,60)		GO:0035107	appendage morphogenesis	1.01e-06	0.000134	2.26 (3050,109,434,35)
peak6722	peak6722	peak6722	peak6487								peak48	NC_037638.1	459271	intron	gene31		GO:0010558	negative regulation of macromolecule biosynthetic process	5.45e-05	0.00707	1.52 (3050,178,754,67)		GO:2000112	regulation of cellular macromolecule biosynthetic process	1.1e-06	0.000142	1.49 (3050,518,434,110)
peak7302	peak7302	peak7302	peak6812								peak49	NC_037638.1	571618	intergenic	NA		GO:2000113	negative regulation of cellular macromolecule biosynthetic process	5.45e-05	0.00692	1.52 (3050,178,754,67)		GO:0001708	cell fate specification	1.14e-06	0.000145	3.41 (3050,35,434,17)
peak1286	peak1286	peak1286	peak10961								peak50	NC_037638.1	638034	intergenic	NA		GO:0048585	negative regulation of response to stimulus	5.97e-05	0.00742	1.49 (3050,195,754,72)		GO:0048518	positive regulation of biological process	1.3e-06	0.000161	1.40 (3050,691,434,138)
peak10991	peak10991	peak10991	peak10620								peak51	NC_037638.1	660747	intron	gene35		GO:0008045	motor neuron axon guidance	6.93e-05	0.00845	2.11 (3050,44,754,23)		GO:0031326	regulation of cellular biosynthetic process	1.35e-06	0.000164	1.48 (3050,538,434,113)
peak6753	peak6753	peak6753	peak5547								peak52	NC_037638.1	677704	intron	gene35		GO:0009890	negative regulation of biosynthetic process	7.68e-05	0.00918	1.50 (3050,183,754,68)		GO:0009889	regulation of biosynthetic process	1.49e-06	0.000178	1.47 (3050,539,434,113)
peak1337	peak1337	peak1337	peak8220								peak53	NC_037638.1	678785	intron	gene35		GO:0031327	negative regulation of cellular biosynthetic process	7.68e-05	0.009	1.50 (3050,183,754,68)		GO:1902679	negative regulation of RNA biosynthetic process	1.53e-06	0.000179	2.03 (3050,149,434,43)
peak6746	peak6746	peak6746	peak8204								peak54	NC_037638.1	679919	intron	gene35		GO:0007610	behavior	8.52e-05	0.00978	1.43 (3050,234,754,83)		GO:0045892	negative regulation of transcription, DNA-templated	1.53e-06	0.000176	2.03 (3050,149,434,43)
peak11178	peak11178	peak11178	peak7864								peak55	NC_037638.1	684243	intron	gene35		GO:0045934	negative regulation of nucleobase-containing compound metabolic process	0.000125	0.0141	1.53 (3050,159,754,60)		GO:1903507	negative regulation of nucleic acid-templated transcription	1.53e-06	0.000173	2.03 (3050,149,434,43)
peak2556	peak2556	peak2556	peak10916								peak56	NC_037638.1	686325	intron	gene35		GO:0048731	system development	0.000134	0.0148	1.56 (3050,143,754,55)		GO:0051253	negative regulation of RNA metabolic process	1.89e-06	0.000209	1.99 (3050,155,434,44)
peak6784	peak6784	peak6784	peak1578								peak57	NC_037638.1	688128	promoter	gene36		GO:0035114	imaginal disc-derived appendage morphogenesis	0.000143	0.0155	1.66 (3050,105,754,43)		GO:0003002	regionalization	1.9e-06	0.000206	1.98 (3050,160,434,45)
peak966	peak966	peak966	peak2305								peak58	NC_037638.1	816008	promoter	gene37		GO:0003008	system process	0.000163	0.0174	1.46 (3050,197,754,71)		GO:0032989	cellular component morphogenesis	2.29e-06	0.000244	1.98 (3050,156,434,44)
peak1910	peak1910	peak1910	peak394								peak59	NC_037638.1	821075	downstream	gene38		GO:0010629	negative regulation of gene expression	0.000207	0.0217	1.41 (3050,229,754,80)		GO:0051960	regulation of nervous system development	2.41e-06	0.000252	1.86 (3050,197,434,52)
peak7342	peak7342	peak7342	peak9648								peak60	NC_037638.1	823346	exon	gene38		GO:0007010	cytoskeleton organization	0.000215	0.0222	1.48 (3050,175,754,64)		GO:0035120	post-embryonic appendage morphogenesis	2.55e-06	0.000262	2.27 (3050,99,434,32)
peak1015	peak1015	peak1015	peak7128								peak61	NC_037638.1	825551	upstream	gene38		GO:0051952	regulation of amine transport	0.000225	0.0228	4.05 (3050,6,754,6)		GO:0051172	negative regulation of nitrogen compound metabolic process	3.32e-06	0.000336	1.76 (3050,236,434,59)
peak7920	peak7920	peak7920	peak3916								peak62	NC_037638.1	837618	upstream	gene39		GO:0050433	regulation of catecholamine secretion	0.000225	0.0224	4.05 (3050,6,754,6)		GO:0045595	regulation of cell differentiation	3.48e-06	0.000346	1.80 (3050,215,434,55)
peak3298	peak3298	peak3298	peak8325								peak63	NC_037638.1	838565	upstream	gene39		GO:0014059	regulation of dopamine secretion	0.000225	0.022	4.05 (3050,6,754,6)		GO:0019219	regulation of nucleobase-containing compound metabolic process	3.73e-06	0.000365	1.47 (3050,518,434,108)
peak9114	peak9114	peak9114	peak10873								peak64	NC_037638.1	840152	upstream	gene39		GO:0050877	nervous system process	0.000245	0.0236	1.48 (3050,169,754,62)		GO:0098609	cell-cell adhesion	3.78e-06	0.000364	2.97 (3050,45,434,19)
peak3961	peak3961	peak3961	peak9417								peak65	NC_037638.1	845043	downstream	gene39		GO:2000026	regulation of multicellular organismal development	0.000255	0.0242	1.35 (3050,293,754,98)		GO:0048522	positive regulation of cellular process	3.79e-06	0.000359	1.41 (3050,622,434,125)
peak10799	peak10799	peak10799	peak3849								peak66	NC_037638.1	846666	downstream	gene39		GO:0050808	synapse organization	0.000282	0.0263	1.67 (3050,92,754,38)		GO:0045934	negative regulation of nucleobase-containing compound metabolic process	4.02e-06	0.000375	1.94 (3050,159,434,44)
peak9472	peak9472	peak9472	peak3137								peak67	NC_037638.1	862684	upstream	gene41		GO:0003002	regionalization	0.000296	0.0272	1.49 (3050,160,754,59)		GO:0050890	cognition	4.33e-06	0.000398	2.29 (3050,92,434,30)
peak2725	peak2725	peak2725	peak5693								peak68	NC_037638.1	867403	five_utr	gene41		GO:0008407	chaeta morphogenesis	0.000314	0.0284	2.50 (3050,21,754,13)		GO:0007611	learning or memory	4.33e-06	0.000392	2.29 (3050,92,434,30)
peak2758	peak2758	peak2758	peak5106								peak69	NC_037638.1	880831	exon	gene42		GO:0048583	regulation of response to stimulus	0.000318	0.0284	1.26 (3050,464,754,145)		GO:0007389	pattern specification process	4.74e-06	0.000422	1.78 (3050,217,434,55)
peak4751	peak4751	peak4751	peak6075								peak70	NC_037638.1	892382	intron	gene42		GO:0035120	post-embryonic appendage morphogenesis	0.000341	0.03	1.63 (3050,99,754,40)		GO:0000122	negative regulation of transcription by RNA polymerase II	5.56e-06	0.000489	2.27 (3050,93,434,30)
peak2835	peak2835	peak2835	peak10501								peak71	NC_037638.1	892694	intron	gene42		GO:0051058	negative regulation of small GTPase mediated signal transduction	0.000347	0.0301	3.03 (3050,12,754,9)		GO:0003008	system process	5.65e-06	0.000489	1.82 (3050,197,434,51)
peak11177	peak11177	peak11177	peak9433								peak72	NC_037638.1	914672	intron	gene42		GO:0046580	negative regulation of Ras protein signal transduction	0.000347	0.0296	3.03 (3050,12,754,9)		GO:0009968	negative regulation of signal transduction	8.21e-06	0.0007	1.90 (3050,163,434,44)
peak4339	peak4339	peak4339	peak9087								peak73	NC_037638.1	933559	intron	gene42		GO:0007157	heterophilic cell-cell adhesion via plasma membrane cell adhesion molecules	0.000374	0.0314	3.24 (3050,10,754,8)		GO:0045944	positive regulation of transcription by RNA polymerase II	8.45e-06	0.000711	1.93 (3050,153,434,42)
peak3122	peak3122	peak3122	peak154								peak74	NC_037638.1	987651	intron	gene42		GO:0035107	appendage morphogenesis	0.000383	0.0318	1.60 (3050,109,754,43)		GO:0050877	nervous system process	9.54e-06	0.000791	1.87 (3050,169,434,45)
peak10657	peak10657	peak10657	peak1204								peak75	NC_037638.1	990102	intron	gene42		GO:0045926	negative regulation of growth	0.000396	0.0324	1.90 (3050,51,754,24)		GO:0051128	regulation of cellular component organization	1.72e-05	0.0014	1.54 (3050,361,434,79)
peak4155	peak4155	peak4155	peak3841								peak76	NC_037638.1	1000537	intron	gene44		GO:0007389	pattern specification process	0.00048	0.0387	1.40 (3050,217,754,75)		GO:0048858	cell projection morphogenesis	1.8e-05	0.00146	2.15 (3050,98,434,30)
peak7465	peak7465	peak7465	peak10858								peak77	NC_037638.1	1002847	promoter	gene45		GO:0045944	positive regulation of transcription by RNA polymerase II	0.000525	0.0418	1.48 (3050,153,754,56)		GO:0031324	negative regulation of cellular metabolic process	1.91e-05	0.00152	1.66 (3050,254,434,60)
peak2914	peak2914	peak2914	peak10845								peak78	NC_037638.1	1021538	intron	gene46		GO:0001708	cell fate specification	0.000559	0.0439	2.08 (3050,35,754,18)		GO:1902680	positive regulation of RNA biosynthetic process	2.71e-05	0.00213	1.74 (3050,202,434,50)
peak3527	peak3527	peak3527	peak1700								peak79	NC_037638.1	1022468	intron	gene46		GO:0090287	regulation of cellular response to growth factor stimulus	0.00056	0.0434	2.25 (3050,27,754,15)		GO:0045893	positive regulation of transcription, DNA-templated	2.71e-05	0.0021	1.74 (3050,202,434,50)
peak10535	peak10535	peak10535	peak8224								peak80	NC_037638.1	1025575	promoter	gene47		GO:0030029	actin filament-based process	0.000581	0.0444	1.61 (3050,98,754,39)		GO:1903508	positive regulation of nucleic acid-templated transcription	2.71e-05	0.00207	1.74 (3050,202,434,50)
peak8116	peak8116	peak8116	peak5480								peak81	NC_037638.1	1049844	intron	gene52		GO:0007626	locomotory behavior	0.000581	0.0439	1.61 (3050,98,754,39)		GO:0060284	regulation of cell development	2.84e-05	0.00215	1.79 (3050,181,434,46)
peak10349	peak10349	peak10349	peak9461								peak82	NC_037638.1	1053009	exon	gene53		GO:0023052	signaling	0.000606	0.0453	1.57 (3050,111,754,43)		GO:0009966	regulation of signal transduction	2.98e-05	0.00222	1.51 (3050,372,434,80)
peak511	peak511	peak511	peak7411								peak83	NC_037638.1	1063341	intron	gene55		GO:0051172	negative regulation of nitrogen compound metabolic process	0.000619	0.0456	1.37 (3050,236,754,80)		GO:0022603	regulation of anatomical structure morphogenesis	3.12e-05	0.0023	1.99 (3050,120,434,34)
peak5862	peak5862	peak5862	peak2716								peak84	NC_037638.1	1066667	intron	gene55		GO:0007267	cell-cell signaling	0.00067	0.0488	1.58 (3050,105,754,41)		GO:0010468	regulation of gene expression	3.19e-05	0.00232	1.38 (3050,603,434,118)
peak1484	peak1484	peak1484	peak5972								peak85	NC_037638.1	1070278	promoter	gene56		GO:0009886	post-embryonic animal morphogenesis	0.000683	0.0492	1.40 (3050,202,754,70)		GO:0120039	plasma membrane bounded cell projection morphogenesis	3.3e-05	0.00238	2.12 (3050,96,434,29)
peak3135	peak3135	peak3135	peak1963								peak86	NC_037638.1	1110408	intron	gene55		GO:0051093	negative regulation of developmental process	0.000717	0.0509	1.55 (3050,115,754,44)		GO:0048812	neuron projection morphogenesis	3.3e-05	0.00235	2.12 (3050,96,434,29)
peak5620	peak5620	peak5620	peak9155								peak87	NC_037638.1	1119531	intron	gene55		GO:0035222	wing disc pattern formation	0.000754	0.053	1.89 (3050,47,754,22)		GO:0048468	cell development	3.71e-05	0.00261	1.68 (3050,226,434,54)
peak2922	peak2922	peak2922	peak10508								peak88	NC_037638.1	1135192	intron	gene55		GO:0000122	negative regulation of transcription by RNA polymerase II	0.000805	0.0559	1.61 (3050,93,754,37)		GO:0032990	cell part morphogenesis	4.26e-05	0.00296	2.07 (3050,102,434,30)
peak8251	peak8251	peak8251	peak8922								peak89	NC_037638.1	1148855	upstream	gene58		GO:0001736	establishment of planar polarity	0.000864	0.0593	2.02 (3050,36,754,18)		GO:0048585	negative regulation of response to stimulus	4.64e-05	0.00318	1.73 (3050,195,434,48)
peak3087	peak3087	peak3087	peak10900								peak90	NC_037638.1	1150205	upstream	gene58		GO:0007164	establishment of tissue polarity	0.000864	0.0586	2.02 (3050,36,754,18)		GO:0001736	establishment of planar polarity	4.93e-05	0.00334	2.93 (3050,36,434,15)
peak11008	peak11008	peak11008	peak38								peak91	NC_037638.1	1154492	five_utr	gene58		GO:0009612	response to mechanical stimulus	0.000882	0.0592	2.80 (3050,13,754,9)		GO:0007164	establishment of tissue polarity	4.93e-05	0.00331	2.93 (3050,36,434,15)
peak9858	peak9858	peak9858	peak9451								peak92	NC_037638.1	1160033	intron	gene58		GO:0071277	cellular response to calcium ion	0.000914	0.0606	4.05 (3050,5,754,5)		GO:0030029	actin filament-based process	5.06e-05	0.00336	2.08 (3050,98,434,29)
peak1152	peak1152	peak1152	peak9728								peak93	NC_037638.1	1165651	intron	gene58		GO:0009888	tissue development	0.000927	0.0608	1.49 (3050,136,754,50)		GO:0050767	regulation of neurogenesis	5.16e-05	0.00339	1.87 (3050,143,434,38)
peak9110	peak9110	peak9110	peak2776								peak94	NC_037638.1	1310609	intron	gene60		GO:0051241	negative regulation of multicellular organismal process	0.000991	0.0643	1.54 (3050,110,754,42)		GO:0010629	negative regulation of gene expression	5.5e-05	0.00357	1.66 (3050,229,434,54)
peak8746	peak8746	peak8746	peak8225								peak95	NC_037638.1	1333009	intron	gene60								GO:0007010	cytoskeleton organization	5.69e-05	0.00365	1.77 (3050,175,434,44)
peak4513	peak4513	peak4513	peak5965								peak96	NC_037638.1	1391230	downstream	gene60								GO:0045664	regulation of neuron differentiation	7.63e-05	0.00485	2.04 (3050,100,434,29)
peak4469	peak4469	peak4469	peak1900								peak97	NC_037638.1	1395637	downstream	gene65								GO:0022416	chaeta development	8.62e-05	0.00542	3.24 (3050,26,434,12)
peak5404	peak5404	peak5404	peak5966								peak98	NC_037638.1	1397555	downstream	gene65								GO:0009888	tissue development	8.94e-05	0.00556	1.86 (3050,136,434,36)
peak1509	peak1509	peak1509	peak5739								peak99	NC_037638.1	1399282	downstream	gene65								GO:0051254	positive regulation of RNA metabolic process	0.000106	0.00652	1.66 (3050,212,434,50)
peak1982	peak1982	peak1982	peak9667								peak100	NC_037638.1	1412865	downstream	gene65								GO:0040007	growth	0.000135	0.00825	2.01 (3050,98,434,28)
peak3299	peak3299	peak3299	peak2564								peak101	NC_037638.1	1462777	upstream	gene68								GO:0048589	developmental growth	0.000135	0.00816	2.01 (3050,98,434,28)
peak1278	peak1278	peak1278	peak5422								peak102	NC_037638.1	1465050	upstream	gene68								GO:0007626	locomotory behavior	0.000135	0.00808	2.01 (3050,98,434,28)
peak2915	peak2915	peak2915	peak5695								peak103	NC_037638.1	1503067	intron	gene69								GO:0040011	locomotion	0.000147	0.00867	1.67 (3050,198,434,47)
peak4882	peak4882	peak4882	peak1175								peak104	NC_037638.1	1507758	intron	gene69								GO:0010557	positive regulation of macromolecule biosynthetic process	0.000185	0.0108	1.61 (3050,222,434,51)
peak2212	peak2212	peak2212	peak6907								peak105	NC_037638.1	1529823	intron	gene69								GO:1900073	regulation of neuromuscular synaptic transmission	0.000186	0.0108	3.72 (3050,17,434,9)
peak6537	peak6537	peak6537	peak8158								peak106	NC_037638.1	1531692	intron	gene69								GO:0051093	negative regulation of developmental process	0.000195	0.0112	1.89 (3050,115,434,31)
peak9757	peak9757	peak9757	peak4195								peak107	NC_037638.1	1533730	intron	gene69								GO:0001709	cell fate determination	0.000211	0.012	2.27 (3050,62,434,20)
peak3088	peak3088	peak3088	peak605								peak108	NC_037638.1	1540613	intron	gene69								GO:0098742	cell-cell adhesion via plasma-membrane adhesion molecules	0.000216	0.0121	2.85 (3050,32,434,13)
peak6184	peak6184	peak6184	peak4037								peak109	NC_037638.1	1573877	intron	gene69								GO:0030036	actin cytoskeleton organization	0.00023	0.0128	2.04 (3050,86,434,25)
peak747	peak747	peak747	peak7611								peak110	NC_037638.1	1614987	promoter	gene72								GO:0007447	imaginal disc pattern formation	0.000232	0.0128	2.20 (3050,67,434,21)
peak10797	peak10797	peak10797	peak362								peak111	NC_037638.1	1615671	promoter	gene72								GO:0080090	regulation of primary metabolic process	0.000301	0.0165	1.28 (3050,735,434,134)
peak7994	peak7994	peak7994	peak979								peak112	NC_037638.1	1620062	five_utr	gene69								GO:0003007	heart morphogenesis	0.000303	0.0164	5.86 (3050,6,434,5)
peak6577	peak6577	peak6577	peak3914								peak113	NC_037638.1	1666957	three_utr	gene77								GO:0010453	regulation of cell fate commitment	0.000308	0.0166	2.91 (3050,29,434,12)
peak6583	peak6583	peak6583	peak8939								peak114	NC_037638.1	1674403	intron	gene79								GO:0051171	regulation of nitrogen compound metabolic process	0.00031	0.0165	1.28 (3050,729,434,133)
peak6538	peak6538	peak6538	peak9468								peak115	NC_037638.1	1682319	promoter	gene82								GO:0007399	nervous system development	0.000312	0.0165	2.39 (3050,50,434,17)
peak9573	peak9573	peak9573	peak1781								peak116	NC_037638.1	1694971	promoter	gene84								GO:0010605	negative regulation of macromolecule metabolic process	0.000317	0.0166	1.51 (3050,284,434,61)
peak3597	peak3597	peak3597	peak4245								peak117	NC_037638.1	1697744	intron	gene85								GO:0048583	regulation of response to stimulus	0.000318	0.0165	1.38 (3050,464,434,91)
peak10679	peak10679	peak10679	peak6832								peak118	NC_037638.1	1700482	promoter	gene85								GO:0048638	regulation of developmental growth	0.000323	0.0166	1.85 (3050,118,434,31)
peak6898	peak6898	peak6898	peak3463								peak119	NC_037638.1	1720331	intron	gene86								GO:0048646	anatomical structure formation involved in morphogenesis	0.000355	0.0181	1.70 (3050,161,434,39)
peak3133	peak3133	peak3133	peak7539								peak120	NC_037638.1	1723781	intron	gene86								GO:0042659	regulation of cell fate specification	0.000399	0.0202	3.19 (3050,22,434,10)
peak9683	peak9683	peak9683	peak1743								peak121	NC_037638.1	1730089	exon	gene86								GO:0045935	positive regulation of nucleobase-containing compound metabolic process	0.000402	0.0201	1.58 (3050,223,434,50)
peak2875	peak2875	peak2875	peak3212								peak122	NC_037638.1	1738903	upstream	gene89								GO:0042676	compound eye cone cell fate commitment	0.000405	0.0202	7.03 (3050,4,434,4)
peak1378	peak1378	peak1378	peak4609								peak123	NC_037638.1	1763954	upstream	gene91								GO:0007635	chemosensory behavior	0.000439	0.0216	2.69 (3050,34,434,13)
peak8153	peak8153	peak8153	peak9055								peak124	NC_037638.1	1770161	promoter	gene91								GO:2000027	regulation of animal organ morphogenesis	0.00046	0.0225	2.39 (3050,47,434,16)
peak9814	peak9814	peak9814	peak5467								peak125	NC_037638.1	1784621	intron	gene91								GO:0045785	positive regulation of cell adhesion	0.000461	0.0224	4.69 (3050,9,434,6)
peak10548	peak10548	peak10548	peak5134								peak126	NC_037638.1	1794529	intron	gene93								GO:0030030	cell projection organization	0.000465	0.0224	1.68 (3050,163,434,39)
peak1893	peak1893	peak1893	peak5465								peak127	NC_037638.1	1810685	five_utr	gene96								GO:0051058	negative regulation of small GTPase mediated signal transduction	0.000467	0.0223	4.10 (3050,12,434,7)
peak2313	peak2313	peak2313	peak10455								peak128	NC_037638.1	1816495	exon	gene98								GO:0046580	negative regulation of Ras protein signal transduction	0.000467	0.0221	4.10 (3050,12,434,7)
peak6480	peak6480	peak6480	peak6115								peak129	NC_037638.1	1818909	promoter	gene99								GO:0051241	negative regulation of multicellular organismal process	0.000472	0.0222	1.85 (3050,110,434,29)
peak965	peak965	peak965	peak3929								peak130	NC_037638.1	1839403	five_utr	gene101								GO:0007163	establishment or maintenance of cell polarity	0.000487	0.0227	2.02 (3050,80,434,23)
peak10170	peak10170	peak10170	peak2622								peak131	NC_037638.1	1841095	exon	gene102								GO:0030010	establishment of cell polarity	0.000541	0.025	3.33 (3050,19,434,9)
peak6200	peak6200	peak6200	peak10635								peak132	NC_037638.1	1849464	five_utr	gene103								GO:0030534	adult behavior	0.000581	0.0267	2.03 (3050,76,434,22)
peak6031	peak6031	peak6031	peak2849								peak133	NC_037638.1	1850334	promoter	gene105								GO:0007416	synapse assembly	0.000609	0.0278	2.61 (3050,35,434,13)
peak4456	peak4456	peak4456	peak3408								peak134	NC_037638.1	1851503	five_utr	gene105								GO:0048167	regulation of synaptic plasticity	0.000618	0.0279	3.06 (3050,23,434,10)
peak9697	peak9697	peak9697	peak1550								peak135	NC_037638.1	1863659	intron	gene105								GO:0031323	regulation of cellular metabolic process	0.000628	0.0282	1.26 (3050,753,434,135)
peak3565	peak3565	peak3565	peak7019								peak136	NC_037638.1	1864943	intron	gene105								GO:0040008	regulation of growth	0.000643	0.0287	1.67 (3050,160,434,38)
peak7364	peak7364	peak7364	peak8240								peak137	NC_037638.1	1870191	intron	gene105								GO:0090287	regulation of cellular response to growth factor stimulus	0.000646	0.0286	2.86 (3050,27,434,11)
peak1668	peak1668	peak1668	peak3544								peak138	NC_037638.1	1872986	intron	gene105								GO:0097435	supramolecular fiber organization	0.000666	0.0292	2.10 (3050,67,434,20)
peak9273	peak9273	peak9273	peak6055								peak139	NC_037638.1	1893913	intron	gene105								GO:0060255	regulation of macromolecule metabolic process	0.000686	0.0299	1.25 (3050,774,434,138)
peak1302	peak1302	peak1302	peak4257								peak140	NC_037638.1	2037788	intron	gene122								GO:0009892	negative regulation of metabolic process	0.000708	0.0306	1.46 (3050,304,434,63)
peak9608	peak9608	peak9608	peak5684								peak141	NC_037638.1	2040706	upstream	gene119								GO:0048859	formation of anatomical boundary	0.000711	0.0305	3.51 (3050,16,434,8)
peak2143	peak2143	peak2143	peak4202								peak142	NC_037638.1	2041331	upstream	gene119								GO:0050808	synapse organization	0.000713	0.0304	1.91 (3050,92,434,25)
peak9291	peak9291	peak9291	peak4293								peak143	NC_037638.1	2042962	promoter	gene123								GO:0009891	positive regulation of biosynthetic process	0.000735	0.0311	1.52 (3050,240,434,52)
peak2738	peak2738	peak2738	peak4766								peak144	NC_037638.1	2043324	intron	gene123								GO:0031328	positive regulation of cellular biosynthetic process	0.000735	0.0309	1.52 (3050,240,434,52)
peak2842	peak2842	peak2842	peak3540								peak145	NC_037638.1	2048444	three_utr	gene123								GO:0045216	cell-cell junction organization	0.000758	0.0317	2.46 (3050,40,434,14)
peak4023	peak4023	peak4023	peak10253								peak146	NC_037638.1	2054248	intron	gene124								GO:0007015	actin filament organization	0.000779	0.0323	2.29 (3050,49,434,16)
peak8476	peak8476	peak8476	peak10020								peak147	NC_037638.1	2089049	promoter	gene129								GO:0048864	stem cell development	0.00089	0.0366	3.78 (3050,13,434,7)
peak6258	peak6258	peak6258	peak5148								peak148	NC_037638.1	2090041	promoter	gene128								GO:0040036	regulation of fibroblast growth factor receptor signaling pathway	0.000936	0.0383	5.02 (3050,7,434,5)
peak1424	peak1424	peak1424	peak3888								peak149	NC_037638.1	2092260	five_utr	gene130								GO:0009994	oocyte differentiation	0.000936	0.038	5.02 (3050,7,434,5)
peak8659	peak8659	peak8659	peak9346								peak150	NC_037638.1	2115924	promoter	gene135								GO:0061061	muscle structure development	0.000974	0.0393	2.09 (3050,64,434,19)
peak2337	peak2337	peak2337	peak5201								peak151	NC_037638.1	2116876	five_utr	gene135
peak7287	peak7287	peak7287	peak5282								peak152	NC_037638.1	2128738	exon	gene135
peak1456	peak1456	peak1456	peak8293								peak153	NC_037638.1	2144947	five_utr	gene137
peak3883	peak3883	peak3883	peak10641								peak154	NC_037638.1	2179238	five_utr	gene138
peak166	peak166	peak166	peak1229								peak155	NC_037638.1	2229236	promoter	gene151
peak5729	peak5729	peak5729	peak5250								peak156	NC_037638.1	2240872	upstream	gene153
peak95	peak95	peak95	peak726								peak157	NC_037638.1	2256595	intron	gene154
peak1561	peak1561	peak1561	peak863								peak158	NC_037638.1	2263458	intron	gene154
peak9916	peak9916	peak9916	peak1221								peak159	NC_037638.1	2267967	exon	gene154
peak3602	peak3602	peak3602	peak4739								peak160	NC_037638.1	2281150	intron	gene155
peak10581	peak10581	peak10581	peak9084								peak161	NC_037638.1	2304225	intron	gene155
peak7638	peak7638	peak7638	peak4964								peak162	NC_037638.1	2386025	promoter	gene155
peak4596	peak4596	peak4596	peak5784								peak163	NC_037638.1	2389079	upstream	gene155
peak8764	peak8764	peak8764	peak8445								peak164	NC_037638.1	2440144	upstream	gene159
peak6166	peak6166	peak6166	peak8756								peak165	NC_037638.1	2444911	upstream	gene160
peak5070	peak5070	peak5070	peak10571								peak166	NC_037638.1	2447651	upstream	gene159
peak2449	peak2449	peak2449	peak7451								peak167	NC_037638.1	2449210	promoter	gene159
peak8798	peak8798	peak8798	peak8338								peak168	NC_037638.1	2449860	promoter	gene159
peak7528	peak7528	peak7528	peak9702								peak169	NC_037638.1	2454037	five_utr	gene160
peak9526	peak9526	peak9526	peak9413								peak170	NC_037638.1	2484179	promoter	gene165
peak11189	peak11189	peak11189	peak60								peak171	NC_037638.1	2494653	promoter	gene167
peak6029	peak6029	peak6029	peak6904								peak172	NC_037638.1	2495055	five_utr	gene168
peak133	peak133	peak133	peak4089								peak173	NC_037638.1	2503128	promoter	gene169
peak10992	peak10992	peak10992	peak11049								peak174	NC_037638.1	2516253	intron	gene173
peak3871	peak3871	peak3871	peak10836								peak175	NC_037638.1	2521126	intron	gene173
peak2626	peak2626	peak2626	peak4182								peak176	NC_037638.1	2539783	downstream	gene174
peak8249	peak8249	peak8249	peak7233								peak177	NC_037638.1	2582942	upstream	gene174
peak7365	peak7365	peak7365	peak5507								peak178	NC_037638.1	2639856	upstream	gene177
peak2213	peak2213	peak2213	peak1450								peak179	NC_037638.1	2647233	promoter	gene177
peak10227	peak10227	peak10227	peak1576								peak180	NC_037638.1	2650150	downstream	gene177
peak9799	peak9799	peak9799	peak9385								peak181	NC_037638.1	2651382	downstream	gene177
peak9607	peak9607	peak9607	peak7625								peak182	NC_037638.1	2655189	downstream	gene177
peak4679	peak4679	peak4679	peak2649								peak183	NC_037638.1	2674071	promoter	gene178
peak6535	peak6535	peak6535	peak2887								peak184	NC_037638.1	2679301	intron	gene178
peak3975	peak3975	peak3975	peak3246								peak185	NC_037638.1	2689225	intron	gene178
peak871	peak871	peak871	peak3787								peak186	NC_037638.1	3019913	intron	gene178
peak4128	peak4128	peak4128	peak10603								peak187	NC_037638.1	3088623	intron	gene178
peak217	peak217	peak217	peak9632								peak188	NC_037638.1	3148323	intergenic	NA
peak6330	peak6330	peak6330	peak5051								peak189	NC_037638.1	3156430	upstream	gene179
peak4435	peak4435	peak4435	peak5829								peak190	NC_037638.1	3158546	upstream	gene179
peak8521	peak8521	peak8521	peak3989								peak191	NC_037638.1	3159529	promoter	gene179
peak870	peak870	peak870	peak2475								peak192	NC_037638.1	3160364	five_utr	gene179
peak7252	peak7252	peak7252	peak398								peak193	NC_037638.1	3178975	exon	gene181
peak10006	peak10006	peak10006	peak7048								peak194	NC_037638.1	3187129	promoter	gene184
peak3582	peak3582	peak3582	peak6782								peak195	NC_037638.1	3187665	five_utr	gene184
peak10128	peak10128	peak10128	peak4005								peak196	NC_037638.1	3197591	five_utr	gene186
peak7564	peak7564	peak7564	peak7792								peak197	NC_037638.1	3242651	intron	gene186
peak6786	peak6786	peak6786	peak8098								peak198	NC_037638.1	3247039	intron	gene186
peak7870	peak7870	peak7870	peak6902								peak199	NC_037638.1	3262653	promoter	gene190
peak6785	peak6785	peak6785	peak720								peak200	NC_037638.1	3263395	promoter	gene191
peak6539	peak6539	peak6539	peak2389								peak201	NC_037638.1	3271652	five_utr	gene193
peak104	peak104	peak104	peak819								peak202	NC_037638.1	3294609	three_utr	gene198
peak8426	peak8426	peak8426	peak1842								peak203	NC_037638.1	3303272	intron	gene198
peak634	peak634	peak634	peak4844								peak204	NC_037638.1	3323247	intron	gene198
peak458	peak458	peak458	peak4031								peak205	NC_037638.1	3325803	intron	gene198
peak10999	peak10999	peak10999	peak7106								peak206	NC_037638.1	3331045	intron	gene198
peak1496	peak1496	peak1496	peak10136								peak207	NC_037638.1	3349119	intron	gene198
peak7690	peak7690	peak7690	peak1234								peak208	NC_037638.1	3411442	intron	gene198
peak6589	peak6589	peak6589	peak10032								peak209	NC_037638.1	3477010	intron	gene198
peak2557	peak2557	peak2557	peak4146								peak210	NC_037638.1	3555056	intron	gene198
peak9246	peak9246	peak9246	peak5904								peak211	NC_037638.1	3743850	intron	gene198
peak5249	peak5249	peak5249	peak1160								peak212	NC_037638.1	3746470	intron	gene198
peak10709	peak10709	peak10709	peak268								peak213	NC_037638.1	3828537	intergenic	NA
peak6897	peak6897	peak6897	peak6959								peak214	NC_037638.1	3858245	intergenic	NA
peak10125	peak10125	peak10125	peak3513								peak215	NC_037638.1	3883204	intergenic	NA
peak3425	peak3425	peak3425	peak4815								peak216	NC_037638.1	3962107	upstream	gene202
peak1421	peak1421	peak1421	peak2952								peak217	NC_037638.1	3962884	upstream	gene202
peak5497	peak5497	peak5497	peak5837								peak218	NC_037638.1	3981008	downstream	gene202
peak270	peak270	peak270	peak7017								peak219	NC_037638.1	3988306	downstream	gene202
peak3570	peak3570	peak3570	peak8458								peak220	NC_037638.1	3997995	intron	gene203
peak7682	peak7682	peak7682	peak5740								peak221	NC_037638.1	4028878	intron	gene203
peak4156	peak4156	peak4156	peak6912								peak222	NC_037638.1	4034184	intron	gene203
peak3130	peak3130	peak3130	peak4154								peak223	NC_037638.1	4067006	intron	gene203
peak2811	peak2811	peak2811	peak6322								peak224	NC_037638.1	4132873	intron	gene203
peak1581	peak1581	peak1581	peak1222								peak225	NC_037638.1	4270451	intron	gene203
peak5228	peak5228	peak5228	peak9873								peak226	NC_037638.1	4324837	intron	gene203
peak5059	peak5059	peak5059	peak8973								peak227	NC_037638.1	4374926	promoter	gene210
peak5969	peak5969	peak5969	peak639								peak228	NC_037638.1	4379179	intron	gene211
peak2372	peak2372	peak2372	peak10918								peak229	NC_037638.1	4381870	intron	gene211
peak1138	peak1138	peak1138	peak2566								peak230	NC_037638.1	4383586	exon	gene211
peak7995	peak7995	peak7995	peak7036								peak231	NC_037638.1	4386869	downstream	gene212
peak3581	peak3581	peak3581	peak9610								peak232	NC_037638.1	4387192	downstream	gene212
peak2863	peak2863	peak2863	peak6604								peak233	NC_037638.1	4388164	downstream	gene211
peak10534	peak10534	peak10534	peak10082								peak234	NC_037638.1	4388662	downstream	gene212
peak2812	peak2812	peak2812	peak7732								peak235	NC_037638.1	4393982	upstream	gene213
peak9490	peak9490	peak9490	peak5195								peak236	NC_037638.1	4409161	intron	gene216
peak8626	peak8626	peak8626	peak7986								peak237	NC_037638.1	4410464	promoter	gene215
peak8553	peak8553	peak8553	peak2067								peak238	NC_037638.1	4435161	intron	gene218
peak6290	peak6290	peak6290	peak9178								peak239	NC_037638.1	4443143	exon	gene220
peak5191	peak5191	peak5191	peak9577								peak240	NC_037638.1	4443883	exon	gene220
peak8145	peak8145	peak8145	peak6036								peak241	NC_037638.1	4455276	exon	gene218
peak9304	peak9304	peak9304	peak5685								peak242	NC_037638.1	4456930	intron	gene218
peak7604	peak7604	peak7604	peak11062								peak243	NC_037638.1	4476687	intron	gene218
peak3828	peak3828	peak3828	peak2740								peak244	NC_037638.1	4478667	upstream	gene223
peak3128	peak3128	peak3128	peak10827								peak245	NC_037638.1	4479831	upstream	gene223
peak6315	peak6315	peak6315	peak5747								peak246	NC_037638.1	4514275	five_utr	gene229
peak7683	peak7683	peak7683	peak3788								peak247	NC_037638.1	4522551	intron	gene229
peak8692	peak8692	peak8692	peak844								peak248	NC_037638.1	4530417	upstream	gene230
peak3635	peak3635	peak3635	peak9659								peak249	NC_037638.1	4551891	promoter	gene235
peak9917	peak9917	peak9917	peak912								peak250	NC_037638.1	4572010	promoter	gene241
peak2045	peak2045	peak2045	peak5236								peak251	NC_037638.1	4579471	promoter	gene244
peak11097	peak11097	peak11097	peak6717								peak252	NC_037638.1	4589583	promoter	gene245
peak2044	peak2044	peak2044	peak2871								peak253	NC_037638.1	4718534	promoter	gene263
peak807	peak807	peak807	peak6501								peak254	NC_037638.1	4727070	five_utr	gene264
peak2759	peak2759	peak2759	peak9426								peak255	NC_037638.1	4790344	five_utr	gene276
peak6899	peak6899	peak6899	peak10981								peak256	NC_037638.1	4870511	intron	gene283
peak377	peak377	peak377	peak4674								peak257	NC_037638.1	4874200	intron	gene283
peak7221	peak7221	peak7221	peak8246								peak258	NC_037638.1	4877710	intron	gene283
peak2036	peak2036	peak2036	peak1654								peak259	NC_037638.1	5010196	upstream	gene291
peak8043	peak8043	peak8043	peak11051								peak260	NC_037638.1	5053900	five_utr	gene298
peak1385	peak1385	peak1385	peak10859								peak261	NC_037638.1	5056112	upstream	gene298
peak8744	peak8744	peak8744	peak8566								peak262	NC_037638.1	5057274	three_utr	gene299
peak2009	peak2009	peak2009	peak9570								peak263	NC_037638.1	5060370	promoter	gene299
peak7693	peak7693	peak7693	peak1714								peak264	NC_037638.1	5062931	promoter	gene300
peak7786	peak7786	peak7786	peak5014								peak265	NC_037638.1	5067801	five_utr	gene302
peak9778	peak9778	peak9778	peak1927								peak266	NC_037638.1	5078553	upstream	gene304
peak4455	peak4455	peak4455	peak7637								peak267	NC_037638.1	5079825	five_utr	gene304
peak8465	peak8465	peak8465	peak2595								peak268	NC_037638.1	5135168	five_utr	gene306
peak5213	peak5213	peak5213	peak783								peak269	NC_037638.1	5138871	intron	gene309
peak1876	peak1876	peak1876	peak7502								peak270	NC_037638.1	5158216	intron	gene311
peak11187	peak11187	peak11187	peak6635								peak271	NC_037638.1	5159695	intron	gene311
peak276	peak276	peak276	peak9423								peak272	NC_037638.1	5170112	intron	gene311
peak10040	peak10040	peak10040	peak7134								peak273	NC_037638.1	5171884	intron	gene311
peak6558	peak6558	peak6558	peak7935								peak274	NC_037638.1	5174546	intron	gene311
peak2748	peak2748	peak2748	peak9099								peak275	NC_037638.1	5199874	five_utr	gene311
peak9878	peak9878	peak9878	peak6077								peak276	NC_037638.1	5221431	upstream	gene317
peak4127	peak4127	peak4127	peak5569								peak277	NC_037638.1	5223806	upstream	gene315
peak8327	peak8327	peak8327	peak6129								peak278	NC_037638.1	5224675	upstream	gene314
peak3953	peak3953	peak3953	peak10368								peak279	NC_037638.1	5231754	five_utr	gene318
peak9613	peak9613	peak9613	peak6326								peak280	NC_037638.1	5241197	upstream	gene319
peak1991	peak1991	peak1991	peak7064								peak281	NC_037638.1	5311246	upstream	gene322
peak6876	peak6876	peak6876	peak4012								peak282	NC_037638.1	5352176	promoter	gene327
peak8943	peak8943	peak8943	peak1713								peak283	NC_037638.1	5357402	exon	gene328
peak8217	peak8217	peak8217	peak4125								peak284	NC_037638.1	5361299	promoter	gene328
peak3880	peak3880	peak3880	peak5010								peak285	NC_037638.1	5372599	five_utr	gene330
peak6341	peak6341	peak6341	peak11068								peak286	NC_037638.1	5375776	downstream	gene330
peak2916	peak2916	peak2916	peak12								peak287	NC_037638.1	5377103	exon	gene331
peak4454	peak4454	peak4454	peak10618								peak288	NC_037638.1	5382060	intron	gene331
peak2843	peak2843	peak2843	peak1249								peak289	NC_037638.1	5391680	intron	gene331
peak1978	peak1978	peak1978	peak9595								peak290	NC_037638.1	5405224	intron	gene331
peak3455	peak3455	peak3455	peak2278								peak291	NC_037638.1	5411189	intron	gene331
peak9715	peak9715	peak9715	peak8811								peak292	NC_037638.1	5447313	five_utr	gene331
peak7515	peak7515	peak7515	peak4250								peak293	NC_037638.1	5450471	promoter	gene336
peak3129	peak3129	peak3129	peak5746								peak294	NC_037638.1	5457257	exon	gene338
peak5157	peak5157	peak5157	peak7476								peak295	NC_037638.1	5466054	intron	gene341
peak8037	peak8037	peak8037	peak4275								peak296	NC_037638.1	5472856	exon	gene342
peak3684	peak3684	peak3684	peak2686								peak297	NC_037638.1	5478979	five_utr	gene342
peak4900	peak4900	peak4900	peak2909								peak298	NC_037638.1	5480957	five_utr	gene343
peak97	peak97	peak97	peak4713								peak299	NC_037638.1	5489982	promoter	gene345
peak4368	peak4368	peak4368	peak4726								peak300	NC_037638.1	5490866	promoter	gene346
peak8944	peak8944	peak8944	peak4842								peak301	NC_037638.1	5576020	intron	gene347
peak5212	peak5212	peak5212	peak7291								peak302	NC_037638.1	5580186	intron	gene347
peak733	peak733	peak733	peak7567								peak303	NC_037638.1	5624176	promoter	gene347
peak6409	peak6409	peak6409	peak4605								peak304	NC_037638.1	5630810	upstream	gene347
peak7835	peak7835	peak7835	peak7066								peak305	NC_037638.1	5643329	intron	gene357
peak6338	peak6338	peak6338	peak4922								peak306	NC_037638.1	5645245	five_utr	gene357
peak9945	peak9945	peak9945	peak7076								peak307	NC_037638.1	5646426	promoter	gene357
peak7954	peak7954	peak7954	peak7256								peak308	NC_037638.1	5650451	upstream	gene361
peak2107	peak2107	peak2107	peak7919								peak309	NC_037638.1	5730089	intron	gene370
peak10536	peak10536	peak10536	peak9672								peak310	NC_037638.1	5731947	intron	gene370
peak10335	peak10335	peak10335	peak6791								peak311	NC_037638.1	5734149	intron	gene370
peak2836	peak2836	peak2836	peak6744								peak312	NC_037638.1	5736029	intron	gene370
peak1498	peak1498	peak1498	peak8247								peak313	NC_037638.1	5738820	intron	gene370
peak4153	peak4153	peak4153	peak1867								peak314	NC_037638.1	5754280	upstream	gene371
peak9798	peak9798	peak9798	peak2474								peak315	NC_037638.1	5767346	intron	gene371
peak11198	peak11198	peak11198	peak6934								peak316	NC_037638.1	5772165	intron	gene372
peak5113	peak5113	peak5113	peak2354								peak317	NC_037638.1	5780714	exon	gene375
peak8485	peak8485	peak8485	peak3873								peak318	NC_037638.1	5782862	promoter	gene376
peak3881	peak3881	peak3881	peak2917								peak319	NC_037638.1	5783803	five_utr	gene376
peak6745	peak6745	peak6745	peak7742								peak320	NC_037638.1	5786869	intron	gene376
peak10218	peak10218	peak10218	peak9010								peak321	NC_037638.1	5793590	intron	gene376
peak2279	peak2279	peak2279	peak3785								peak322	NC_037638.1	5806936	five_utr	gene378
peak7593	peak7593	peak7593	peak8164								peak323	NC_037638.1	5965437	exon	gene378
peak1768	peak1768	peak1768	peak4214								peak324	NC_037638.1	5969771	five_utr	gene381
peak11190	peak11190	peak11190	peak519								peak325	NC_037638.1	6019164	promoter	gene388
peak8232	peak8232	peak8232	peak7065								peak326	NC_037638.1	6039988	five_utr	gene391
peak5089	peak5089	peak5089	peak7641								peak327	NC_037638.1	6059286	five_utr	gene395
peak3670	peak3670	peak3670	peak4933								peak328	NC_037638.1	6070296	five_utr	gene396
peak10441	peak10441	peak10441	peak4935								peak329	NC_037638.1	6072346	five_utr	gene396
peak2376	peak2376	peak2376	peak1312								peak330	NC_037638.1	6074303	exon	gene396
peak9305	peak9305	peak9305	peak5151								peak331	NC_037638.1	6075474	three_utr	gene396
peak11108	peak11108	peak11108	peak1252								peak332	NC_037638.1	6120421	downstream	gene400
peak6787	peak6787	peak6787	peak3017								peak333	NC_037638.1	6234656	five_utr	gene409
peak9773	peak9773	peak9773	peak1764								peak334	NC_037638.1	6241221	intron	gene409
peak10754	peak10754	peak10754	peak2636								peak335	NC_037638.1	6249320	intron	gene409
peak296	peak296	peak296	peak9446								peak336	NC_037638.1	6257752	intron	gene409
peak5498	peak5498	peak5498	peak3885								peak337	NC_037638.1	6271906	intron	gene409
peak10008	peak10008	peak10008	peak1729								peak338	NC_037638.1	6277182	exon	gene414
peak2707	peak2707	peak2707	peak5182								peak339	NC_037638.1	6286929	five_utr	gene415
peak6291	peak6291	peak6291	peak1747								peak340	NC_037638.1	6291142	upstream	gene418
peak8398	peak8398	peak8398	peak10866								peak341	NC_037638.1	6294535	upstream	gene418
peak7869	peak7869	peak7869	peak6690								peak342	NC_037638.1	6299456	promoter	gene418
peak10892	peak10892	peak10892	peak2024								peak343	NC_037638.1	6317288	promoter	gene420
peak2803	peak2803	peak2803	peak264								peak344	NC_037638.1	6319584	intron	gene418
peak7777	peak7777	peak7777	peak6713								peak345	NC_037638.1	6326037	intron	gene418
peak277	peak277	peak277	peak10033								peak346	NC_037638.1	6328373	intron	gene418
peak10012	peak10012	peak10012	peak8011								peak347	NC_037638.1	6328738	intron	gene418
peak4351	peak4351	peak4351	peak9751								peak348	NC_037638.1	6332658	intron	gene418
peak4750	peak4750	peak4750	peak5121								peak349	NC_037638.1	6355544	intron	gene418
peak9202	peak9202	peak9202	peak2847								peak350	NC_037638.1	6387051	five_utr	gene426
peak99	peak99	peak99	peak3241								peak351	NC_037638.1	6390199	intron	gene426
peak2126	peak2126	peak2126	peak1752								peak352	NC_037638.1	6395748	intron	gene426
peak9975	peak9975	peak9975	peak3373								peak353	NC_037638.1	6398728	intron	gene426
peak7694	peak7694	peak7694	peak8014								peak354	NC_037638.1	6401211	intron	gene426
peak226	peak226	peak226	peak1072								peak355	NC_037638.1	6402117	intron	gene426
peak7578	peak7578	peak7578	peak9080								peak356	NC_037638.1	6408873	promoter	gene428
peak613	peak613	peak613	peak2401								peak357	NC_037638.1	6521824	intron	gene437
peak11059	peak11059	peak11059	peak9045								peak358	NC_037638.1	6538987	exon	gene439
peak445	peak445	peak445	peak1809								peak359	NC_037638.1	6555405	promoter	gene442
peak6609	peak6609	peak6609	peak10026								peak360	NC_037638.1	6568986	promoter	gene445
peak9772	peak9772	peak9772	peak2941								peak361	NC_037638.1	6601545	promoter	gene456
peak9116	peak9116	peak9116	peak812								peak362	NC_037638.1	6643190	five_utr	gene463
peak5194	peak5194	peak5194	peak5606								peak363	NC_037638.1	6645400	promoter	gene464
peak10127	peak10127	peak10127	peak809								peak364	NC_037638.1	6646322	five_utr	gene464
peak684	peak684	peak684	peak2266								peak365	NC_037638.1	6651095	upstream	gene463
peak1335	peak1335	peak1335	peak6788								peak366	NC_037638.1	6654482	five_utr	gene465
peak1670	peak1670	peak1670	peak5436								peak367	NC_037638.1	6718482	intron	gene465
peak6797	peak6797	peak6797	peak4952								peak368	NC_037638.1	6761092	intron	gene465
peak8207	peak8207	peak8207	peak5903								peak369	NC_037638.1	6774668	upstream	gene468
peak10497	peak10497	peak10497	peak8567								peak370	NC_037638.1	6776979	downstream	gene469
peak1788	peak1788	peak1788	peak4559								peak371	NC_037638.1	6778550	downstream	gene469
peak2131	peak2131	peak2131	peak11048								peak372	NC_037638.1	6780192	downstream	gene469
peak1067	peak1067	peak1067	peak815								peak373	NC_037638.1	6782279	downstream	gene470
peak2912	peak2912	peak2912	peak8507								peak374	NC_037638.1	6783259	downstream	gene469
peak6464	peak6464	peak6464	peak39								peak375	NC_037638.1	6783949	downstream	gene470
peak6021	peak6021	peak6021	peak796								peak376	NC_037638.1	6784235	downstream	gene470
peak11119	peak11119	peak11119	peak6817								peak377	NC_037638.1	6815910	intron	gene470
peak11033	peak11033	peak11033	peak4458								peak378	NC_037638.1	6833625	five_utr	gene470
peak8166	peak8166	peak8166	peak8695								peak379	NC_037638.1	6847938	five_utr	gene474
peak10529	peak10529	peak10529	peak8952								peak380	NC_037638.1	6859102	exon	gene475
peak10906	peak10906	peak10906	peak5358								peak381	NC_037638.1	6915248	exon	gene482
peak8425	peak8425	peak8425	peak8820								peak382	NC_037638.1	6920111	intron	gene482
peak1060	peak1060	peak1060	peak7921								peak383	NC_037638.1	6949293	upstream	gene485
peak9590	peak9590	peak9590	peak5518								peak384	NC_037638.1	6958693	intron	gene487
peak1922	peak1922	peak1922	peak4778								peak385	NC_037638.1	6959478	exon	gene487
peak9054	peak9054	peak9054	peak9593								peak386	NC_037638.1	6962684	intron	gene487
peak221	peak221	peak221	peak6533								peak387	NC_037638.1	6964279	intron	gene487
peak3561	peak3561	peak3561	peak1314								peak388	NC_037638.1	6967081	intron	gene487
peak1870	peak1870	peak1870	peak9578								peak389	NC_037638.1	6975974	intron	gene487
peak88	peak88	peak88	peak9707								peak390	NC_037638.1	6978769	intron	gene487
peak6773	peak6773	peak6773	peak10018								peak391	NC_037638.1	6979105	intron	gene487
peak10537	peak10537	peak10537	peak4008								peak392	NC_037638.1	6979757	intron	gene487
peak3147	peak3147	peak3147	peak11036								peak393	NC_037638.1	6980306	intron	gene487
peak11126	peak11126	peak11126	peak9009								peak394	NC_037638.1	6981563	intron	gene487
peak6837	peak6837	peak6837	peak3884								peak395	NC_037638.1	6983666	intron	gene487
peak4502	peak4502	peak4502	peak7018								peak396	NC_037638.1	6985876	five_utr	gene487
peak5188	peak5188	peak5188	peak4151								peak397	NC_037638.1	6986411	intron	gene487
peak2813	peak2813	peak2813	peak8978								peak398	NC_037638.1	6987887	intron	gene487
peak4963	peak4963	peak4963	peak4836								peak399	NC_037638.1	6995427	promoter	gene489
peak8315	peak8315	peak8315	peak2445								peak400	NC_037638.1	6999534	promoter	gene490
peak3824	peak3824	peak3824	peak4047								peak401	NC_037638.1	7003352	three_utr	gene492
peak10592	peak10592	peak10592	peak6229								peak402	NC_037638.1	7004205	three_utr	gene492
peak5868	peak5868	peak5868	peak5200								peak403	NC_037638.1	7016210	upstream	gene494
peak9684	peak9684	peak9684	peak4354								peak404	NC_037638.1	7021996	downstream	gene492
peak5846	peak5846	peak5846	peak1143								peak405	NC_037638.1	7025781	downstream	gene494
peak5000	peak5000	peak5000	peak4046								peak406	NC_037638.1	7029904	downstream	gene495
peak7856	peak7856	peak7856	peak8198								peak407	NC_037638.1	7036545	downstream	gene492
peak7338	peak7338	peak7338	peak4286								peak408	NC_037638.1	7049552	five_utr	gene496
peak5617	peak5617	peak5617	peak2655								peak409	NC_037638.1	7084232	promoter	gene506
peak278	peak278	peak278	peak7240								peak410	NC_037638.1	7084830	promoter	gene503
peak3436	peak3436	peak3436	peak3232								peak411	NC_037638.1	7089392	upstream	gene503
peak2808	peak2808	peak2808	peak4651								peak412	NC_037638.1	7102820	intron	gene507
peak8956	peak8956	peak8956	peak3908								peak413	NC_037638.1	7115045	intron	gene507
peak220	peak220	peak220	peak5519								peak414	NC_037638.1	7130359	intron	gene507
peak2844	peak2844	peak2844	peak6760								peak415	NC_037638.1	7145420	promoter	gene508
peak2395	peak2395	peak2395	peak9753								peak416	NC_037638.1	7156191	three_utr	gene509
peak4622	peak4622	peak4622	peak7455								peak417	NC_037638.1	7160312	exon	gene509
peak4991	peak4991	peak4991	peak1340								peak418	NC_037638.1	7206053	downstream	gene509
peak7951	peak7951	peak7951	peak8190								peak419	NC_037638.1	7209667	promoter	gene509
peak1382	peak1382	peak1382	peak6334								peak420	NC_037638.1	7371486	intron	gene510
peak6191	peak6191	peak6191	peak5641								peak421	NC_037638.1	7414838	intron	gene510
peak176	peak176	peak176	peak4158								peak422	NC_037638.1	7574874	intron	gene510
peak6563	peak6563	peak6563	peak5424								peak423	NC_037638.1	7618084	intron	gene510
peak3449	peak3449	peak3449	peak6352								peak424	NC_037638.1	7912585	five_utr	gene517
peak90	peak90	peak90	peak3198								peak425	NC_037638.1	7913603	promoter	gene517
peak3042	peak3042	peak3042	peak4759								peak426	NC_037638.1	7914763	upstream	gene520
peak6778	peak6778	peak6778	peak3178								peak427	NC_037638.1	7916309	upstream	gene517
peak2618	peak2618	peak2618	peak4397								peak428	NC_037638.1	7924807	five_utr	gene520
peak7492	peak7492	peak7492	peak8505								peak429	NC_037638.1	7928993	intron	gene520
peak10474	peak10474	peak10474	peak1431								peak430	NC_037638.1	7962418	upstream	gene528
peak10533	peak10533	peak10533	peak10069								peak431	NC_037638.1	7964536	promoter	gene526
peak3006	peak3006	peak3006	peak4326								peak432	NC_037638.1	7981637	five_utr	gene529
peak8433	peak8433	peak8433	peak5810								peak433	NC_037638.1	7983827	intron	gene529
peak7936	peak7936	peak7936	peak10884								peak434	NC_037638.1	7985558	intron	gene529
peak2127	peak2127	peak2127	peak4402								peak435	NC_037638.1	7993469	exon	gene530
peak8427	peak8427	peak8427	peak4779								peak436	NC_037638.1	7994742	promoter	gene530
peak4871	peak4871	peak4871	peak1835								peak437	NC_037638.1	7995112	intron	gene529
peak2047	peak2047	peak2047	peak2576								peak438	NC_037638.1	8035861	intron	gene529
peak9699	peak9699	peak9699	peak11066								peak439	NC_037638.1	8038768	intron	gene529
peak939	peak939	peak939	peak854								peak440	NC_037638.1	8049512	intron	gene529
peak10191	peak10191	peak10191	peak6407								peak441	NC_037638.1	8050882	intron	gene529
peak8061	peak8061	peak8061	peak1675								peak442	NC_037638.1	8051491	intron	gene529
peak8372	peak8372	peak8372	peak5887								peak443	NC_037638.1	8056361	intron	gene529
peak205	peak205	peak205	peak813								peak444	NC_037638.1	8120113	intron	gene529
peak8649	peak8649	peak8649	peak3547								peak445	NC_037638.1	8122403	intron	gene529
peak5442	peak5442	peak5442	peak10076								peak446	NC_037638.1	8124522	intron	gene529
peak3008	peak3008	peak3008	peak6475								peak447	NC_037638.1	8167312	five_utr	gene531
peak8301	peak8301	peak8301	peak2086								peak448	NC_037638.1	8176701	promoter	gene532
peak4938	peak4938	peak4938	peak3001								peak449	NC_037638.1	8178068	promoter	gene534
peak1965	peak1965	peak1965	peak1266								peak450	NC_037638.1	8188513	five_utr	gene538
peak2690	peak2690	peak2690	peak8723								peak451	NC_037638.1	8217960	intron	gene539
peak2482	peak2482	peak2482	peak3963								peak452	NC_037638.1	8232339	intron	gene539
peak9790	peak9790	peak9790	peak1836								peak453	NC_037638.1	8244234	promoter	gene539
peak1495	peak1495	peak1495	peak9765								peak454	NC_037638.1	8247240	promoter	gene541
peak6767	peak6767	peak6767	peak10070								peak455	NC_037638.1	8258908	intron	gene542
peak7061	peak7061	peak7061	peak10157								peak456	NC_037638.1	8301746	intron	gene542
peak3651	peak3651	peak3651	peak320								peak457	NC_037638.1	8304455	intron	gene542
peak1309	peak1309	peak1309	peak451								peak458	NC_037638.1	8371584	intron	gene542
peak11004	peak11004	peak11004	peak640								peak459	NC_037638.1	8406005	intron	gene542
peak8	peak8	peak8	peak9159								peak460	NC_037638.1	8406894	intron	gene542
peak4409	peak4409	peak4409	peak8163								peak461	NC_037638.1	8473860	intron	gene542
peak2733	peak2733	peak2733	peak11163								peak462	NC_037638.1	8528724	exon	gene542
peak3285	peak3285	peak3285	peak1648								peak463	NC_037638.1	8531544	three_utr	gene542
peak9689	peak9689	peak9689	peak1754								peak464	NC_037638.1	8533091	promoter	gene549
peak10748	peak10748	peak10748	peak5907								peak465	NC_037638.1	8536254	three_utr	gene550
peak8367	peak8367	peak8367	peak3194								peak466	NC_037638.1	8543878	intron	gene550
peak4747	peak4747	peak4747	peak5564								peak467	NC_037638.1	8545644	intron	gene550
peak7847	peak7847	peak7847	peak9615								peak468	NC_037638.1	8547938	intron	gene550
peak7944	peak7944	peak7944	peak4827								peak469	NC_037638.1	8655020	promoter	gene553
peak11058	peak11058	peak11058	peak4101								peak470	NC_037638.1	8655548	promoter	gene553
peak6875	peak6875	peak6875	peak7810								peak471	NC_037638.1	8656837	intron	gene550
peak1328	peak1328	peak1328	peak5906								peak472	NC_037638.1	8658211	intron	gene550
peak8904	peak8904	peak8904	peak472								peak473	NC_037638.1	8745853	intron	gene550
peak3264	peak3264	peak3264	peak9904								peak474	NC_037638.1	8747680	intron	gene550
peak4892	peak4892	peak4892	peak3138								peak475	NC_037638.1	8774852	intron	gene550
peak178	peak178	peak178	peak8202								peak476	NC_037638.1	8819072	intron	gene550
peak6171	peak6171	peak6171	peak9092								peak477	NC_037638.1	8821976	intron	gene550
peak1980	peak1980	peak1980	peak1102								peak478	NC_037638.1	8879306	intron	gene550
peak7520	peak7520	peak7520	peak3942								peak479	NC_037638.1	8890569	intron	gene550
peak3573	peak3573	peak3573	peak8266								peak480	NC_037638.1	8942554	intron	gene550
peak10757	peak10757	peak10757	peak6867								peak481	NC_037638.1	8973727	intron	gene550
peak4869	peak4869	peak4869	peak10030								peak482	NC_037638.1	9001115	intron	gene550
peak8778	peak8778	peak8778	peak4894								peak483	NC_037638.1	9003102	five_utr	gene550
peak3230	peak3230	peak3230	peak2201								peak484	NC_037638.1	9004228	upstream	gene550
peak10358	peak10358	peak10358	peak8244								peak485	NC_037638.1	9010923	upstream	gene550
peak770	peak770	peak770	peak4678								peak486	NC_037638.1	9055536	promoter	gene559
peak2264	peak2264	peak2264	peak1161								peak487	NC_037638.1	9062374	exon	gene561
peak1352	peak1352	peak1352	peak4553								peak488	NC_037638.1	9069917	promoter	gene563
peak3228	peak3228	peak3228	peak4106								peak489	NC_037638.1	9083841	five_utr	gene565
peak11084	peak11084	peak11084	peak1860								peak490	NC_037638.1	9094157	intron	gene566
peak165	peak165	peak165	peak7283								peak491	NC_037638.1	9101835	promoter	gene568
peak2328	peak2328	peak2328	peak11111								peak492	NC_037638.1	9111537	five_utr	gene571
peak9867	peak9867	peak9867	peak949								peak493	NC_037638.1	9134874	promoter	gene575
peak7274	peak7274	peak7274	peak6087								peak494	NC_037638.1	9187117	intron	gene578
peak11145	peak11145	peak11145	peak2384								peak495	NC_037638.1	9189022	exon	gene579
peak4965	peak4965	peak4965	peak363								peak496	NC_037638.1	9203735	intron	gene580
peak3179	peak3179	peak3179	peak3782								peak497	NC_037638.1	9216430	intron	gene580
peak10336	peak10336	peak10336	peak9833								peak498	NC_037638.1	9238628	five_utr	gene581
peak3827	peak3827	peak3827	peak479								peak499	NC_037638.1	9255828	exon	gene582
peak2809	peak2809	peak2809	peak4380								peak500	NC_037638.1	9258912	promoter	gene583
peak1669	peak1669	peak1669	peak2498								peak501	NC_037638.1	9273675	promoter	gene585
peak6614	peak6614	peak6614	peak8821								peak502	NC_037638.1	9301712	promoter	gene590
peak4525	peak4525	peak4525	peak1411								peak503	NC_037638.1	9309488	intron	gene591
peak422	peak422	peak422	peak7035								peak504	NC_037638.1	9310579	five_utr	gene592
peak2039	peak2039	peak2039	peak10061								peak505	NC_037638.1	9311443	exon	gene592
peak1852	peak1852	peak1852	peak4838								peak506	NC_037638.1	9319870	five_utr	gene593
peak5040	peak5040	peak5040	peak6881								peak507	NC_037638.1	9323392	intron	gene593
peak2641	peak2641	peak2641	peak3102								peak508	NC_037638.1	9326161	promoter	gene591
peak4322	peak4322	peak4322	peak6127								peak509	NC_037638.1	9336548	exon	gene594
peak9998	peak9998	peak9998	peak8194								peak510	NC_037638.1	9359903	intron	gene595
peak8191	peak8191	peak8191	peak9727								peak511	NC_037638.1	9570496	intron	gene595
peak6228	peak6228	peak6228	peak3489								peak512	NC_037638.1	9718892	downstream	gene602
peak7491	peak7491	peak7491	peak8766								peak513	NC_037638.1	9748734	intron	gene603
peak11440	peak11440	peak11440	peak9823								peak514	NC_037638.1	9813221	intron	gene603
peak9774	peak9774	peak9774	peak4207								peak515	NC_037638.1	9833786	intergenic	NA
peak8062	peak8062	peak8062	peak6335								peak516	NC_037638.1	9834386	intergenic	NA
peak899	peak899	peak899	peak5820								peak517	NC_037638.1	9858989	intergenic	NA
peak9926	peak9926	peak9926	peak2419								peak518	NC_037638.1	9939565	promoter	gene605
peak10217	peak10217	peak10217	peak9265								peak519	NC_037638.1	10212546	upstream	gene608
peak3551	peak3551	peak3551	peak2662								peak520	NC_037638.1	10226892	promoter	gene609
peak7285	peak7285	peak7285	peak9786								peak521	NC_037638.1	10232315	three_utr	gene610
peak3673	peak3673	peak3673	peak4006								peak522	NC_037638.1	10270201	intron	gene610
peak9463	peak9463	peak9463	peak6686								peak523	NC_037638.1	10287723	intron	gene610
peak8295	peak8295	peak8295	peak9863								peak524	NC_037638.1	10300890	intron	gene610
peak4393	peak4393	peak4393	peak3636								peak525	NC_037638.1	10307453	intron	gene610
peak7945	peak7945	peak7945	peak7340								peak526	NC_037638.1	10348370	intron	gene610
peak2798	peak2798	peak2798	peak3823								peak527	NC_037638.1	10352655	intron	gene610
peak1343	peak1343	peak1343	peak11152								peak528	NC_037638.1	10353405	intron	gene610
peak8000	peak8000	peak8000	peak862								peak529	NC_037638.1	10377281	intron	gene610
peak5247	peak5247	peak5247	peak4292								peak530	NC_037638.1	10380878	intron	gene610
peak301	peak301	peak301	peak4680								peak531	NC_037638.1	10388730	intron	gene610
peak202	peak202	peak202	peak1761								peak532	NC_037638.1	10395710	intron	gene610
peak5238	peak5238	peak5238	peak1232								peak533	NC_037638.1	10408091	intron	gene610
peak635	peak635	peak635	peak3918								peak534	NC_037638.1	10449738	upstream	gene613
peak5611	peak5611	peak5611	peak149								peak535	NC_037638.1	10451327	upstream	gene613
peak222	peak222	peak222	peak284								peak536	NC_037638.1	10452957	promoter	gene613
peak9898	peak9898	peak9898	peak5860								peak537	NC_037638.1	10460569	upstream	gene610
peak1744	peak1744	peak1744	peak9127								peak538	NC_037638.1	10463257	intron	gene614
peak10398	peak10398	peak10398	peak2788								peak539	NC_037638.1	10473966	five_utr	gene616
peak189	peak189	peak189	peak7267								peak540	NC_037638.1	10487369	promoter	gene619
peak1299	peak1299	peak1299	peak3538								peak541	NC_037638.1	10534528	promoter	gene624
peak1210	peak1210	peak1210	peak1486								peak542	NC_037638.1	10629086	exon	gene626
peak9197	peak9197	peak9197	peak7989								peak543	NC_037638.1	10648028	downstream	gene630
peak216	peak216	peak216	peak3998								peak544	NC_037638.1	10736510	promoter	gene637
peak4224	peak4224	peak4224	peak4328								peak545	NC_037638.1	10771585	promoter	gene647
peak2435	peak2435	peak2435	peak4208								peak546	NC_037638.1	10772239	five_utr	gene647
peak7349	peak7349	peak7349	peak1971								peak547	NC_037638.1	10811505	five_utr	gene655
peak7868	peak7868	peak7868	peak9086								peak548	NC_037638.1	10875444	intron	gene666
peak6444	peak6444	peak6444	peak7628								peak549	NC_037638.1	10885155	intron	gene668
peak271	peak271	peak271	peak5170								peak550	NC_037638.1	10890047	promoter	gene667
peak8917	peak8917	peak8917	peak1304								peak551	NC_037638.1	10904426	exon	gene669
peak4430	peak4430	peak4430	peak5652								peak552	NC_037638.1	10906460	downstream	gene668
peak4164	peak4164	peak4164	peak4291								peak553	NC_037638.1	10907084	downstream	gene670
peak5154	peak5154	peak5154	peak3903								peak554	NC_037638.1	10909477	exon	gene670
peak10100	peak10100	peak10100	peak9241								peak555	NC_037638.1	10921906	upstream	gene672
peak8023	peak8023	peak8023	peak5909								peak556	NC_037638.1	10923525	five_utr	gene672
peak9523	peak9523	peak9523	peak9989								peak557	NC_037638.1	10923871	intron	gene672
peak3861	peak3861	peak3861	peak4676								peak558	NC_037638.1	10937659	promoter	gene674
peak6058	peak6058	peak6058	peak6249								peak559	NC_037638.1	10938677	exon	gene675
peak2079	peak2079	peak2079	peak4706								peak560	NC_037638.1	10942894	exon	gene676
peak6831	peak6831	peak6831	peak9443								peak561	NC_037638.1	10945311	intron	gene676
peak8042	peak8042	peak8042	peak2388								peak562	NC_037638.1	10945763	intron	gene676
peak2693	peak2693	peak2693	peak3344								peak563	NC_037638.1	10949112	intron	gene676
peak8370	peak8370	peak8370	peak2347								peak564	NC_037638.1	10954333	intron	gene676
peak3108	peak3108	peak3108	peak5649								peak565	NC_037638.1	10964209	promoter	gene677
peak85	peak85	peak85	peak8940								peak566	NC_037638.1	10975393	intron	gene679
peak193	peak193	peak193	peak9920								peak567	NC_037638.1	10976102	five_utr	gene679
peak10589	peak10589	peak10589	peak4192								peak568	NC_037638.1	10976931	promoter	gene679
peak83	peak83	peak83	peak7220								peak569	NC_037638.1	11018458	intergenic	NA
peak208	peak208	peak208	peak3368								peak570	NC_037638.1	11070676	promoter	gene684
peak10346	peak10346	peak10346	peak4804								peak571	NC_037638.1	11100046	downstream	gene687
peak5644	peak5644	peak5644	peak8394								peak572	NC_037638.1	11119015	promoter	gene690
peak8765	peak8765	peak8765	peak8020								peak573	NC_037638.1	11119722	promoter	gene689
peak8288	peak8288	peak8288	peak1640								peak574	NC_037638.1	11141625	intron	gene694
peak10952	peak10952	peak10952	peak4072								peak575	NC_037638.1	11143500	five_utr	gene694
peak6829	peak6829	peak6829	peak5790								peak576	NC_037638.1	11158065	promoter	gene696
peak9690	peak9690	peak9690	peak8590								peak577	NC_037638.1	11159180	promoter	gene695
peak746	peak746	peak746	peak11168								peak578	NC_037638.1	11164026	five_utr	gene698
peak7811	peak7811	peak7811	peak2621								peak579	NC_037638.1	11238681	intron	gene700
peak9198	peak9198	peak9198	peak6768								peak580	NC_037638.1	11293705	intron	gene700
peak3227	peak3227	peak3227	peak1595								peak581	NC_037638.1	11295953	exon	gene707
peak542	peak542	peak542	peak9043								peak582	NC_037638.1	11305850	five_utr	gene708
peak1633	peak1633	peak1633	peak4147								peak583	NC_037638.1	11307051	promoter	gene708
peak2929	peak2929	peak2929	peak9348								peak584	NC_037638.1	11308386	intron	gene709
peak2749	peak2749	peak2749	peak406								peak585	NC_037638.1	11320405	intron	gene710
peak4822	peak4822	peak4822	peak4027								peak586	NC_037638.1	11327798	intron	gene710
peak1603	peak1603	peak1603	peak4788								peak587	NC_037638.1	11329979	intron	gene710
peak3250	peak3250	peak3250	peak1588								peak588	NC_037638.1	11331150	intron	gene710
peak5356	peak5356	peak5356	peak627								peak589	NC_037638.1	11332667	intron	gene710
peak11098	peak11098	peak11098	peak9420								peak590	NC_037638.1	11338554	intron	gene710
peak8524	peak8524	peak8524	peak6359								peak591	NC_037638.1	11364253	intron	gene715
peak4100	peak4100	peak4100	peak3274								peak592	NC_037638.1	11426375	upstream	gene722
peak6463	peak6463	peak6463	peak486								peak593	NC_037638.1	11430365	five_utr	gene722
peak3172	peak3172	peak3172	peak6526								peak594	NC_037638.1	11433365	intron	gene722
peak7306	peak7306	peak7306	peak10158								peak595	NC_037638.1	11437626	intron	gene722
peak10593	peak10593	peak10593	peak11611								peak596	NC_037638.1	11506648	promoter	gene728
peak591	peak591	peak591	peak5952								peak597	NC_037638.1	11550439	five_utr	gene739
peak2934	peak2934	peak2934	peak10478								peak598	NC_037638.1	11557780	three_utr	gene739
peak7116	peak7116	peak7116	peak3193								peak599	NC_037638.1	11605550	intron	gene744
peak1477	peak1477	peak1477	peak3214								peak600	NC_037638.1	11653280	intron	gene747
peak6629	peak6629	peak6629	peak2268								peak601	NC_037638.1	11671802	promoter	gene750
peak10814	peak10814	peak10814	peak4789								peak602	NC_037638.1	11690836	exon	gene754
peak5253	peak5253	peak5253	peak8214								peak603	NC_037638.1	11692509	exon	gene755
peak823	peak823	peak823	peak4790								peak604	NC_037638.1	11704498	intron	gene758
peak6491	peak6491	peak6491	peak7558								peak605	NC_037638.1	11714324	five_utr	gene759
peak3027	peak3027	peak3027	peak9915								peak606	NC_037638.1	11717440	intron	gene759
peak739	peak739	peak739	peak4602								peak607	NC_037638.1	11771648	five_utr	gene772
peak5475	peak5475	peak5475	peak8051								peak608	NC_037638.1	11835586	promoter	gene778
peak8024	peak8024	peak8024	peak3852								peak609	NC_037638.1	11842103	promoter	gene782
peak6633	peak6633	peak6633	peak10979								peak610	NC_037638.1	11868959	five_utr	gene786
peak2706	peak2706	peak2706	peak6109								peak611	NC_037638.1	11885535	promoter	gene785
peak5088	peak5088	peak5088	peak1803								peak612	NC_037638.1	11890425	upstream	gene785
peak11185	peak11185	peak11185	peak7193								peak613	NC_037638.1	11896539	downstream	gene790
peak9518	peak9518	peak9518	peak1512								peak614	NC_037638.1	11906292	upstream	gene792
peak10549	peak10549	peak10549	peak2324								peak615	NC_037638.1	11907460	promoter	gene791
peak2218	peak2218	peak2218	peak5734								peak616	NC_037638.1	11915260	intron	gene792
peak3276	peak3276	peak3276	peak421								peak617	NC_037638.1	11929273	promoter	gene793
peak5305	peak5305	peak5305	peak1621								peak618	NC_037638.1	11930284	intron	gene792
peak11003	peak11003	peak11003	peak2701								peak619	NC_037638.1	11957684	intron	gene792
peak1325	peak1325	peak1325	peak2583								peak620	NC_037638.1	11962703	intron	gene792
peak10491	peak10491	peak10491	peak7290								peak621	NC_037638.1	11963359	promoter	gene795
peak5341	peak5341	peak5341	peak4157								peak622	NC_037638.1	11966800	intron	gene792
peak10611	peak10611	peak10611	peak5067								peak623	NC_037638.1	11982246	five_utr	gene797
peak5525	peak5525	peak5525	peak5891								peak624	NC_037638.1	12001257	intron	gene797
peak1642	peak1642	peak1642	peak5325								peak625	NC_037638.1	12006884	intron	gene797
peak2903	peak2903	peak2903	peak4835								peak626	NC_037638.1	12026796	intron	gene799
peak5097	peak5097	peak5097	peak3844								peak627	NC_037638.1	12028943	five_utr	gene799
peak7996	peak7996	peak7996	peak2684								peak628	NC_037638.1	12031025	intron	gene800
peak10011	peak10011	peak10011	peak8265								peak629	NC_037638.1	12032213	intron	gene800
peak3550	peak3550	peak3550	peak8188								peak630	NC_037638.1	12066910	five_utr	gene806
peak2691	peak2691	peak2691	peak9481								peak631	NC_037638.1	12078294	exon	gene808
peak10750	peak10750	peak10750	peak6808								peak632	NC_037638.1	12092340	intron	gene808
peak2791	peak2791	peak2791	peak4630								peak633	NC_037638.1	12096890	intron	gene808
peak6343	peak6343	peak6343	peak4570								peak634	NC_037638.1	12109709	intron	gene808
peak9105	peak9105	peak9105	peak6815								peak635	NC_037638.1	12118751	intron	gene808
peak9226	peak9226	peak9226	peak4073								peak636	NC_037638.1	12120609	promoter	gene809
peak9029	peak9029	peak9029	peak9962								peak637	NC_037638.1	12136612	intron	gene808
peak5534	peak5534	peak5534	peak4183								peak638	NC_037638.1	12141352	intron	gene808
peak2539	peak2539	peak2539	peak5964								peak639	NC_037638.1	12170313	promoter	gene810
peak9234	peak9234	peak9234	peak9402								peak640	NC_037638.1	12177021	intron	gene811
peak2677	peak2677	peak2677	peak4112								peak641	NC_037638.1	12198325	five_utr	gene812
peak10638	peak10638	peak10638	peak8245								peak642	NC_037638.1	12200296	promoter	gene814
peak2877	peak2877	peak2877	peak5399								peak643	NC_037638.1	12309081	promoter	gene820
peak7261	peak7261	peak7261	peak1755								peak644	NC_037638.1	12348420	five_utr	gene822
peak3945	peak3945	peak3945	peak6903								peak645	NC_037638.1	12349945	intron	gene820
peak878	peak878	peak878	peak5210								peak646	NC_037638.1	12350825	intron	gene820
peak2309	peak2309	peak2309	peak7988								peak647	NC_037638.1	12355767	promoter	gene824
peak101	peak101	peak101	peak4629								peak648	NC_037638.1	12356837	promoter	gene823
peak8905	peak8905	peak8905	peak3235								peak649	NC_037638.1	12388398	five_utr	gene829
peak2373	peak2373	peak2373	peak4580								peak650	NC_037638.1	12393955	five_utr	gene831
peak7981	peak7981	peak7981	peak9934								peak651	NC_037638.1	12395615	intron	gene831
peak8178	peak8178	peak8178	peak6138								peak652	NC_037638.1	12396420	intron	gene831
peak8739	peak8739	peak8739	peak6909								peak653	NC_037638.1	12437948	promoter	gene836
peak7038	peak7038	peak7038	peak426								peak654	NC_037638.1	12453479	upstream	gene838
peak1118	peak1118	peak1118	peak3100								peak655	NC_037638.1	12453853	upstream	gene838
peak2144	peak2144	peak2144	peak6814								peak656	NC_037638.1	12455384	upstream	gene838
peak7294	peak7294	peak7294	peak3895								peak657	NC_037638.1	12467887	intron	gene838
peak10510	peak10510	peak10510	peak4137								peak658	NC_037638.1	12470843	intron	gene838
peak10947	peak10947	peak10947	peak7469								peak659	NC_037638.1	12473011	intron	gene838
peak4229	peak4229	peak4229	peak4093								peak660	NC_037638.1	12501462	upstream	gene842
peak8481	peak8481	peak8481	peak3834								peak661	NC_037638.1	12575932	upstream	gene850
peak2689	peak2689	peak2689	peak5164								peak662	NC_037638.1	12582881	promoter	gene852
peak4174	peak4174	peak4174	peak7433								peak663	NC_037638.1	12595019	promoter	gene857
peak7764	peak7764	peak7764	peak9406								peak664	NC_037638.1	12600032	five_utr	gene859
peak1384	peak1384	peak1384	peak2297								peak665	NC_037638.1	12604286	promoter	gene860
peak4910	peak4910	peak4910	peak3342								peak666	NC_037638.1	12613956	downstream	gene861
peak3078	peak3078	peak3078	peak1805								peak667	NC_037638.1	12617920	upstream	gene862
peak2132	peak2132	peak2132	peak3870								peak668	NC_037638.1	12623794	upstream	gene862
peak7701	peak7701	peak7701	peak9970								peak669	NC_037638.1	12628605	intron	gene862
peak1975	peak1975	peak1975	peak5075								peak670	NC_037638.1	12629211	intron	gene862
peak3702	peak3702	peak3702	peak5653								peak671	NC_037638.1	12636068	intron	gene862
peak8044	peak8044	peak8044	peak1223								peak672	NC_037638.1	12641089	intron	gene862
peak4303	peak4303	peak4303	peak6549								peak673	NC_037638.1	12646213	intron	gene862
peak5057	peak5057	peak5057	peak401								peak674	NC_037638.1	12650274	intron	gene862
peak607	peak607	peak607	peak4628								peak675	NC_037638.1	12664125	intron	gene862
peak1355	peak1355	peak1355	peak5779								peak676	NC_037638.1	12666243	intron	gene862
peak10746	peak10746	peak10746	peak9186								peak677	NC_037638.1	12667766	intron	gene862
peak5867	peak5867	peak5867	peak5491								peak678	NC_037638.1	12683139	intron	gene862
peak10352	peak10352	peak10352	peak6924								peak679	NC_037638.1	12693555	intron	gene862
peak6476	peak6476	peak6476	peak10137								peak680	NC_037638.1	12727611	intron	gene862
peak7831	peak7831	peak7831	peak3340								peak681	NC_037638.1	12730659	intron	gene862
peak10844	peak10844	peak10844	peak6164								peak682	NC_037638.1	12742206	intron	gene862
peak4444	peak4444	peak4444	peak7467								peak683	NC_037638.1	12749560	intron	gene862
peak8625	peak8625	peak8625	peak4982								peak684	NC_037638.1	12768694	intron	gene862
peak10729	peak10729	peak10729	peak8443								peak685	NC_037638.1	12777314	intron	gene862
peak1660	peak1660	peak1660	peak2682								peak686	NC_037638.1	12810136	intron	gene862
peak1646	peak1646	peak1646	peak4793								peak687	NC_037638.1	12887575	intron	gene862
peak7715	peak7715	peak7715	peak4418								peak688	NC_037638.1	12920346	intron	gene862
peak5455	peak5455	peak5455	peak9586								peak689	NC_037638.1	12953533	intron	gene862
peak1042	peak1042	peak1042	peak5018								peak690	NC_037638.1	12977634	five_utr	gene869
peak8250	peak8250	peak8250	peak6869								peak691	NC_037638.1	12981326	three_utr	gene869
peak3598	peak3598	peak3598	peak3857								peak692	NC_037638.1	13030677	five_utr	gene870
peak867	peak867	peak867	peak199								peak693	NC_037638.1	13205125	intron	gene873
peak744	peak744	peak744	peak5237								peak694	NC_037638.1	13587633	intron	gene883
peak6943	peak6943	peak6943	peak1485								peak695	NC_037638.1	13631343	intron	gene883
peak3679	peak3679	peak3679	peak1433								peak696	NC_037638.1	13652190	intron	gene883
peak3107	peak3107	peak3107	peak836								peak697	NC_037638.1	13662483	intron	gene883
peak6540	peak6540	peak6540	peak9919								peak698	NC_037638.1	13870277	five_utr	gene883
peak6394	peak6394	peak6394	peak4618								peak699	NC_037638.1	13982930	intergenic	NA
peak6040	peak6040	peak6040	peak7472								peak700	NC_037638.1	13985037	intergenic	NA
peak10818	peak10818	peak10818	peak3939								peak701	NC_037638.1	13989373	intergenic	NA
peak9176	peak9176	peak9176	peak2646								peak702	NC_037638.1	13992523	intergenic	NA
peak3976	peak3976	peak3976	peak4777								peak703	NC_037638.1	13993588	intergenic	NA
peak10648	peak10648	peak10648	peak9003								peak704	NC_037638.1	13995140	intergenic	NA
peak10881	peak10881	peak10881	peak1756								peak705	NC_037638.1	14008227	five_utr	gene887
peak5471	peak5471	peak5471	peak5651								peak706	NC_037638.1	14021376	promoter	gene889
peak5560	peak5560	peak5560	peak7379								peak707	NC_037638.1	14028609	intron	gene891
peak45	peak45	peak45	peak3142								peak708	NC_037638.1	14037708	intron	gene892
peak4071	peak4071	peak4071	peak148								peak709	NC_037638.1	14038746	intron	gene892
peak9053	peak9053	peak9053	peak1616								peak710	NC_037638.1	14039435	intron	gene892
peak10686	peak10686	peak10686	peak8234								peak711	NC_037638.1	14040446	exon	gene892
peak5081	peak5081	peak5081	peak4142								peak712	NC_037638.1	14060889	exon	gene894
peak10131	peak10131	peak10131	peak7380								peak713	NC_037638.1	14063077	promoter	gene895
peak3395	peak3395	peak3395	peak3846								peak714	NC_037638.1	14066805	five_utr	gene896
peak6877	peak6877	peak6877	peak3899								peak715	NC_037638.1	14137107	exon	gene903
peak662	peak662	peak662	peak1522								peak716	NC_037638.1	14137725	promoter	gene903
peak6896	peak6896	peak6896	peak9399								peak717	NC_037638.1	14164574	upstream	gene905
peak10668	peak10668	peak10668	peak5735								peak718	NC_037638.1	14167034	intron	gene907
peak5994	peak5994	peak5994	peak2647								peak719	NC_037638.1	14169209	intron	gene907
peak5499	peak5499	peak5499	peak1765								peak720	NC_037638.1	14171546	intron	gene907
peak4699	peak4699	peak4699	peak7381								peak721	NC_037638.1	14243893	promoter	gene912
peak10176	peak10176	peak10176	peak4685								peak722	NC_037638.1	14245352	promoter	gene913
peak4702	peak4702	peak4702	peak3902								peak723	NC_037638.1	14249568	intron	gene913
peak5753	peak5753	peak5753	peak4593								peak724	NC_037638.1	14254666	intron	gene914
peak4433	peak4433	peak4433	peak9953								peak725	NC_037638.1	14264757	intron	gene916
peak5451	peak5451	peak5451	peak2467								peak726	NC_037638.1	14274626	upstream	gene918
peak302	peak302	peak302	peak7470								peak727	NC_037638.1	14276816	upstream	gene915
peak2666	peak2666	peak2666	peak643								peak728	NC_037638.1	14282934	promoter	gene917
peak9995	peak9995	peak9995	peak1575								peak729	NC_037638.1	14290867	promoter	gene921
peak2930	peak2930	peak2930	peak4794								peak730	NC_037638.1	14309572	intron	gene921
peak7569	peak7569	peak7569	peak10931								peak731	NC_037638.1	14310613	five_utr	gene922
peak6473	peak6473	peak6473	peak8201								peak732	NC_037638.1	14317034	intron	gene921
peak3426	peak3426	peak3426	peak3816								peak733	NC_037638.1	14330950	exon	gene924
peak9604	peak9604	peak9604	peak3901								peak734	NC_037638.1	14372300	upstream	gene933
peak2214	peak2214	peak2214	peak4578								peak735	NC_037638.1	14375987	exon	gene935
peak1879	peak1879	peak1879	peak11495								peak736	NC_037638.1	14396438	intron	gene935
peak5550	peak5550	peak5550	peak1093								peak737	NC_037638.1	14397422	intron	gene935
peak2056	peak2056	peak2056	peak883								peak738	NC_037638.1	14413542	intron	gene935
peak10465	peak10465	peak10465	peak7292								peak739	NC_037638.1	14418937	intron	gene935
peak2057	peak2057	peak2057	peak4731								peak740	NC_037638.1	14426296	upstream	gene935
peak2705	peak2705	peak2705	peak9967								peak741	NC_037638.1	14428015	exon	gene937
peak7980	peak7980	peak7980	peak430								peak742	NC_037638.1	14428603	promoter	gene938
peak2274	peak2274	peak2274	peak4686								peak743	NC_037638.1	14429696	promoter	gene937
peak10114	peak10114	peak10114	peak877								peak744	NC_037638.1	14436457	upstream	gene937
peak10766	peak10766	peak10766	peak9954								peak745	NC_037638.1	14506796	intron	gene940
peak1002	peak1002	peak1002	peak8696								peak746	NC_037638.1	14522756	intron	gene940
peak10734	peak10734	peak10734	peak4785								peak747	NC_037638.1	14586726	intron	gene940
peak11124	peak11124	peak11124	peak6186								peak748	NC_037638.1	14711925	intron	gene940
peak6145	peak6145	peak6145	peak11196								peak749	NC_037638.1	14727447	five_utr	gene940
peak967	peak967	peak967	peak2316								peak750	NC_037638.1	14736021	exon	gene943
peak5542	peak5542	peak5542	peak4284								peak751	NC_037638.1	14738979	intron	gene943
peak1142	peak1142	peak1142	peak9964								peak752	NC_037638.1	14740383	promoter	gene944
peak3321	peak3321	peak3321	peak1597								peak753	NC_037638.1	14741929	exon	gene944
peak5919	peak5919	peak5919	peak2466								peak754	NC_037638.1	14752847	promoter	gene948
peak986	peak986	peak986	peak522								peak755	NC_037638.1	14794090	exon	gene949
peak1316	peak1316	peak1316	peak11173								peak756	NC_037638.1	14810737	intron	gene952
peak8875	peak8875	peak8875	peak2661								peak757	NC_037638.1	14811963	intron	gene952
peak4210	peak4210	peak4210	peak876								peak758	NC_037638.1	14857648	promoter	gene962
peak1147	peak1147	peak1147	peak1091								peak759	NC_037638.1	14868491	intron	gene963
peak1656	peak1656	peak1656	peak7468								peak760	NC_037638.1	14869279	promoter	gene963
peak3105	peak3105	peak3105	peak7471								peak761	NC_037638.1	14883125	five_utr	gene966
peak10562	peak10562	peak10562	peak9363								peak762	NC_037638.1	14898232	promoter	gene970
peak2255	peak2255	peak2255	peak3845								peak763	NC_037638.1	14908238	intron	gene971
peak3501	peak3501	peak3501	peak1604								peak764	NC_037638.1	14937012	intron	gene971
peak7657	peak7657	peak7657	peak11191								peak765	NC_037638.1	14938536	intron	gene971
peak2757	peak2757	peak2757	peak457								peak766	NC_037638.1	14945632	upstream	gene972
peak3111	peak3111	peak3111	peak9966								peak767	NC_037638.1	14946953	promoter	gene971
peak10405	peak10405	peak10405	peak4687								peak768	NC_037638.1	14968053	exon	gene973
peak3297	peak3297	peak3297	peak1629								peak769	NC_037638.1	14982494	promoter	gene974
peak3515	peak3515	peak3515	peak1630								peak770	NC_037638.1	15001114	five_utr	gene979
peak6798	peak6798	peak6798	peak2346								peak771	NC_037638.1	15095347	intron	gene983
peak9630	peak9630	peak9630	peak474								peak772	NC_037638.1	15097436	five_utr	gene983
peak1387	peak1387	peak1387	peak9963								peak773	NC_037638.1	15098968	upstream	gene985
peak6182	peak6182	peak6182	peak1832								peak774	NC_037638.1	15111227	intron	gene987
peak849	peak849	peak849	peak1610								peak775	NC_037638.1	15113542	intron	gene987
peak10579	peak10579	peak10579	peak439								peak776	NC_037638.1	15139507	promoter	gene992
peak2507	peak2507	peak2507	peak1611								peak777	NC_037638.1	15160416	five_utr	gene993
peak7331	peak7331	peak7331	peak143								peak778	NC_037638.1	15172318	intron	gene995
peak8045	peak8045	peak8045	peak4887								peak779	NC_037638.1	15173305	promoter	gene996
peak3833	peak3833	peak3833	peak2338								peak780	NC_037638.1	15181078	promoter	gene998
peak108	peak108	peak108	peak9965								peak781	NC_037638.1	15186239	exon	gene999
peak2551	peak2551	peak2551	peak1827								peak782	NC_037638.1	15188178	exon	gene1000
peak9360	peak9360	peak9360	peak1834								peak783	NC_037638.1	15189758	promoter	gene1002
peak3663	peak3663	peak3663	peak4690								peak784	NC_037638.1	15195679	promoter	gene1004
peak5229	peak5229	peak5229	peak1830								peak785	NC_037638.1	15215735	intron	gene1009
peak6466	peak6466	peak6466	peak1829								peak786	NC_037638.1	15257370	upstream	gene1010
peak1422	peak1422	peak1422	peak1831								peak787	NC_037638.1	15261468	five_utr	gene1010
peak6111	peak6111	peak6111	peak1828								peak788	NC_037638.1	15281139	intron	gene1010
peak1310	peak1310	peak1310	peak1833								peak789	NC_037638.1	15355399	intergenic	NA
peak3223	peak3223	peak3223									peak790	NC_037638.1	15405112	upstream	gene1014
peak10390	peak10390	peak10390									peak791	NC_037638.1	15495581	five_utr	gene1015
peak5680	peak5680	peak5680									peak792	NC_037638.1	15541015	promoter	gene1017
peak10628	peak10628	peak10628									peak793	NC_037638.1	15610222	three_utr	gene1016
peak5103	peak5103	peak5103									peak794	NC_037638.1	15610848	exon	gene1016
peak10678	peak10678	peak10678									peak795	NC_037638.1	15616314	promoter	gene1019
peak1976	peak1976	peak1976									peak796	NC_037638.1	15617427	promoter	gene1018
peak384	peak384	peak384									peak797	NC_037638.1	15629315	intron	gene1020
peak10639	peak10639	peak10639									peak798	NC_037638.1	15630277	intron	gene1020
peak5114	peak5114	peak5114									peak799	NC_037638.1	15632237	intron	gene1020
peak10442	peak10442	peak10442									peak800	NC_037638.1	15632871	five_utr	gene1020
peak2443	peak2443	peak2443									peak801	NC_037638.1	15633524	five_utr	gene1020
peak9769	peak9769	peak9769									peak802	NC_037638.1	15642572	exon	gene1022
peak10986	peak10986	peak10986									peak803	NC_037638.1	15648258	promoter	gene1023
peak7495	peak7495	peak7495									peak804	NC_037638.1	15649981	intron	gene1024
peak5614	peak5614	peak5614									peak805	NC_037638.1	15658105	five_utr	gene1025
peak10243	peak10243	peak10243									peak806	NC_037638.1	15660025	intron	gene1026
peak9206	peak9206	peak9206									peak807	NC_037638.1	15674575	intron	gene1026
peak1413	peak1413	peak1413									peak808	NC_037638.1	15737382	promoter	gene1030
peak8955	peak8955	peak8955									peak809	NC_037638.1	15828567	intron	gene1033
peak9597	peak9597	peak9597									peak810	NC_037638.1	15843363	intron	gene1033
peak7488	peak7488	peak7488									peak811	NC_037638.1	15848870	promoter	gene1034
peak5146	peak5146	peak5146									peak812	NC_037638.1	15877140	promoter	gene1038
peak6998	peak6998	peak6998									peak813	NC_037638.1	15879952	promoter	gene1039
peak10706	peak10706	peak10706									peak814	NC_037638.1	15881677	upstream	gene1039
peak9885	peak9885	peak9885									peak815	NC_037638.1	15883648	exon	gene1041
peak6582	peak6582	peak6582									peak816	NC_037638.1	15887792	five_utr	gene1042
peak1622	peak1622	peak1622									peak817	NC_037638.1	15889936	promoter	gene1042
peak3470	peak3470	peak3470									peak818	NC_037638.1	15891170	upstream	gene1044
peak9942	peak9942	peak9942									peak819	NC_037638.1	15892273	promoter	gene1044
peak1399	peak1399	peak1399									peak820	NC_037638.1	15943688	intron	gene1047
peak6254	peak6254	peak6254									peak821	NC_037638.1	15945112	intron	gene1047
peak10614	peak10614	peak10614									peak822	NC_037638.1	15955089	intron	gene1047
peak10119	peak10119	peak10119									peak823	NC_037638.1	15964292	intron	gene1047
peak6826	peak6826	peak6826									peak824	NC_037638.1	15966022	intron	gene1047
peak5963	peak5963	peak5963									peak825	NC_037638.1	15975395	intron	gene1047
peak10241	peak10241	peak10241									peak826	NC_037638.1	15980861	intron	gene1047
peak6423	peak6423	peak6423									peak827	NC_037638.1	15981880	intron	gene1047
peak10946	peak10946	peak10946									peak828	NC_037638.1	15991376	intron	gene1047
peak1577	peak1577	peak1577									peak829	NC_037638.1	16002683	intron	gene1047
peak4304	peak4304	peak4304									peak830	NC_037638.1	16013641	intron	gene1047
peak5580	peak5580	peak5580									peak831	NC_037638.1	16017739	intron	gene1047
peak4934	peak4934	peak4934									peak832	NC_037638.1	16019424	intron	gene1047
peak3098	peak3098	peak3098									peak833	NC_037638.1	16019999	intron	gene1047
peak435	peak435	peak435									peak834	NC_037638.1	16034571	exon	gene1047
peak9609	peak9609	peak9609									peak835	NC_037638.1	16048141	intron	gene1048
peak4313	peak4313	peak4313									peak836	NC_037638.1	16082879	downstream	gene1050
peak9817	peak9817	peak9817									peak837	NC_037638.1	16083838	three_utr	gene1050
peak5193	peak5193	peak5193									peak838	NC_037638.1	16090583	intron	gene1050
peak3086	peak3086	peak3086									peak839	NC_037638.1	16096319	intron	gene1050
peak8060	peak8060	peak8060									peak840	NC_037638.1	16105189	intron	gene1050
peak11015	peak11015	peak11015									peak841	NC_037638.1	16113460	intron	gene1050
peak3224	peak3224	peak3224									peak842	NC_037638.1	16114480	intron	gene1050
peak7575	peak7575	peak7575									peak843	NC_037638.1	16127447	intron	gene1050
peak6612	peak6612	peak6612									peak844	NC_037638.1	16132166	promoter	gene1051
peak5414	peak5414	peak5414									peak845	NC_037638.1	16140869	intron	gene1050
peak4816	peak4816	peak4816									peak846	NC_037638.1	16143856	five_utr	gene1053
peak7832	peak7832	peak7832									peak847	NC_037638.1	16167489	exon	gene1050
peak1816	peak1816	peak1816									peak848	NC_037638.1	16176805	intron	gene1054
peak2038	peak2038	peak2038									peak849	NC_037638.1	16280320	intron	gene1054
peak1943	peak1943	peak1943									peak850	NC_037638.1	16301827	intron	gene1054
peak8410	peak8410	peak8410									peak851	NC_037638.1	16348073	intron	gene1054
peak4923	peak4923	peak4923									peak852	NC_037638.1	16406010	intron	gene1054
peak6561	peak6561	peak6561									peak853	NC_037638.1	16481117	five_utr	gene1054
peak9245	peak9245	peak9245									peak854	NC_037638.1	16590882	intron	gene1056
peak3296	peak3296	peak3296									peak855	NC_037638.1	16592749	exon	gene1057
peak5533	peak5533	peak5533									peak856	NC_037638.1	16632880	intron	gene1056
peak1473	peak1473	peak1473									peak857	NC_037638.1	16734902	promoter	gene1064
peak7656	peak7656	peak7656									peak858	NC_037638.1	16750126	three_utr	gene1066
peak7496	peak7496	peak7496									peak859	NC_037638.1	16758659	upstream	gene1066
peak2882	peak2882	peak2882									peak860	NC_037638.1	16765122	upstream	gene1068
peak10707	peak10707	peak10707									peak861	NC_037638.1	16768167	upstream	gene1068
peak7898	peak7898	peak7898									peak862	NC_037638.1	16771375	promoter	gene1068
peak5716	peak5716	peak5716									peak863	NC_037638.1	16775522	intron	gene1069
peak10118	peak10118	peak10118									peak864	NC_037638.1	16776547	intron	gene1069
peak10381	peak10381	peak10381									peak865	NC_037638.1	16781078	intron	gene1069
peak2290	peak2290	peak2290									peak866	NC_037638.1	16784233	upstream	gene1069
peak1840	peak1840	peak1840									peak867	NC_037638.1	16890290	downstream	gene1070
peak10759	peak10759	peak10759									peak868	NC_037638.1	16899395	downstream	gene1070
peak4061	peak4061	peak4061									peak869	NC_037638.1	16906115	upstream	gene1071
peak5930	peak5930	peak5930									peak870	NC_037638.1	16906851	upstream	gene1070
peak2817	peak2817	peak2817									peak871	NC_037638.1	16908467	promoter	gene1071
peak4704	peak4704	peak4704									peak872	NC_037638.1	16909449	upstream	gene1070
peak6288	peak6288	peak6288									peak873	NC_037638.1	17010675	five_utr	gene1075
peak10359	peak10359	peak10359									peak874	NC_037638.1	17011793	upstream	gene1075
peak8938	peak8938	peak8938									peak875	NC_037638.1	17041409	intergenic	NA
peak9761	peak9761	peak9761									peak876	NC_037638.1	17043943	intergenic	NA
peak9172	peak9172	peak9172									peak877	NC_037638.1	17045817	intergenic	NA
peak2033	peak2033	peak2033									peak878	NC_037638.1	17133160	downstream	gene1077
peak9175	peak9175	peak9175									peak879	NC_037638.1	17174370	promoter	gene1079
peak8470	peak8470	peak8470									peak880	NC_037638.1	17270591	downstream	gene1079
peak5346	peak5346	peak5346									peak881	NC_037638.1	17271572	downstream	gene1079
peak5851	peak5851	peak5851									peak882	NC_037638.1	17272274	downstream	gene1079
peak6536	peak6536	peak6536									peak883	NC_037638.1	17273102	downstream	gene1079
peak6391	peak6391	peak6391									peak884	NC_037638.1	17274082	intergenic	NA
peak9368	peak9368	peak9368									peak885	NC_037638.1	17274819	intergenic	NA
peak257	peak257	peak257									peak886	NC_037638.1	17353739	intron	gene1080
peak8144	peak8144	peak8144									peak887	NC_037638.1	17354267	intron	gene1080
peak2514	peak2514	peak2514									peak888	NC_037638.1	17393264	exon	gene1080
peak386	peak386	peak386									peak889	NC_037638.1	17506719	five_utr	gene1081
peak7993	peak7993	peak7993									peak890	NC_037638.1	17512064	upstream	gene1081
peak6949	peak6949	peak6949									peak891	NC_037638.1	17515051	upstream	gene1081
peak4042	peak4042	peak4042									peak892	NC_037638.1	17521433	intergenic	NA
peak11114	peak11114	peak11114									peak893	NC_037638.1	17566216	intron	gene1082
peak7897	peak7897	peak7897									peak894	NC_037638.1	17568752	promoter	gene1083
peak7151	peak7151	peak7151									peak895	NC_037638.1	17571500	intron	gene1082
peak98	peak98	peak98									peak896	NC_037638.1	17572597	exon	gene1082
peak5076	peak5076	peak5076									peak897	NC_037638.1	17610019	exon	gene1084
peak9868	peak9868	peak9868									peak898	NC_037638.1	17628552	upstream	gene1087
peak1139	peak1139	peak1139									peak899	NC_037638.1	17705215	five_utr	gene1088
peak10612	peak10612	peak10612									peak900	NC_037638.1	17799691	promoter	gene1089
peak10094	peak10094	peak10094									peak901	NC_037638.1	17802599	upstream	gene1089
peak3665	peak3665	peak3665									peak902	NC_037638.1	17884546	downstream	gene1091
peak3132	peak3132	peak3132									peak903	NC_037638.1	17889897	intron	gene1091
peak828	peak828	peak828									peak904	NC_037638.1	17894608	five_utr	gene1092
peak6933	peak6933	peak6933									peak905	NC_037638.1	17895803	promoter	gene1094
peak9883	peak9883	peak9883									peak906	NC_037638.1	18195200	promoter	gene1100
peak2477	peak2477	peak2477									peak907	NC_037638.1	18221756	intergenic	NA
peak5535	peak5535	peak5535									peak908	NC_037638.1	18287832	intergenic	NA
peak11038	peak11038	peak11038									peak909	NC_037638.1	18300037	five_utr	gene1101
peak5100	peak5100	peak5100									peak910	NC_037638.1	18301906	intron	gene1101
peak2433	peak2433	peak2433									peak911	NC_037638.1	18342998	exon	gene1101
peak5071	peak5071	peak5071									peak912	NC_037638.1	18344740	intron	gene1101
peak7736	peak7736	peak7736									peak913	NC_037638.1	18345937	intron	gene1101
peak7833	peak7833	peak7833									peak914	NC_037638.1	18347874	exon	gene1101
peak10345	peak10345	peak10345									peak915	NC_037638.1	18349702	intron	gene1101
peak1739	peak1739	peak1739									peak916	NC_037638.1	18351065	intron	gene1101
peak10547	peak10547	peak10547									peak917	NC_037638.1	18351941	intron	gene1101
peak2256	peak2256	peak2256									peak918	NC_037638.1	18355173	intron	gene1101
peak9151	peak9151	peak9151									peak919	NC_037638.1	18388823	downstream	gene1101
peak7117	peak7117	peak7117									peak920	NC_037638.1	18389558	downstream	gene1101
peak7060	peak7060	peak7060									peak921	NC_037638.1	18396771	downstream	gene1101
peak5959	peak5959	peak5959									peak922	NC_037638.1	18415321	promoter	gene1103
peak3291	peak3291	peak3291									peak923	NC_037638.1	18416411	exon	gene1103
peak2481	peak2481	peak2481									peak924	NC_037638.1	18436495	promoter	gene1105
peak7056	peak7056	peak7056									peak925	NC_037638.1	18446642	promoter	gene1107
peak2000	peak2000	peak2000									peak926	NC_037638.1	18453526	five_utr	gene1108
peak7948	peak7948	peak7948									peak927	NC_037638.1	18501435	intron	gene1108
peak5472	peak5472	peak5472									peak928	NC_037638.1	18529324	intron	gene1108
peak2282	peak2282	peak2282									peak929	NC_037638.1	18536398	upstream	gene1109
peak3571	peak3571	peak3571									peak930	NC_037638.1	18539138	five_utr	gene1109
peak1733	peak1733	peak1733									peak931	NC_037638.1	18552893	upstream	gene1110
peak274	peak274	peak274									peak932	NC_037638.1	18554374	upstream	gene1117
peak10517	peak10517	peak10517									peak933	NC_037638.1	18555303	upstream	gene1110
peak10953	peak10953	peak10953									peak934	NC_037638.1	18556323	upstream	gene1112
peak2252	peak2252	peak2252									peak935	NC_037638.1	18557171	upstream	gene1116
peak8216	peak8216	peak8216									peak936	NC_037638.1	18557662	upstream	gene1117
peak7696	peak7696	peak7696									peak937	NC_037638.1	18589088	exon	gene1123
peak4868	peak4868	peak4868									peak938	NC_037638.1	18634025	intron	gene1124
peak5659	peak5659	peak5659									peak939	NC_037638.1	18709046	intron	gene1124
peak5769	peak5769	peak5769									peak940	NC_037638.1	18777834	promoter	gene1124
peak6595	peak6595	peak6595									peak941	NC_037638.1	18793791	intergenic	NA
peak1841	peak1841	peak1841									peak942	NC_037638.1	18804170	intergenic	NA
peak6271	peak6271	peak6271									peak943	NC_037638.1	18808260	intergenic	NA
peak8970	peak8970	peak8970									peak944	NC_037638.1	18835185	intergenic	NA
peak631	peak631	peak631									peak945	NC_037638.1	18839542	upstream	gene1125
peak5800	peak5800	peak5800									peak946	NC_037638.1	18848723	five_utr	gene1125
peak10052	peak10052	peak10052									peak947	NC_037638.1	18893482	promoter	gene1126
peak2698	peak2698	peak2698									peak948	NC_037638.1	18896432	intron	gene1127
peak7756	peak7756	peak7756									peak949	NC_037638.1	18898438	intron	gene1127
peak1614	peak1614	peak1614									peak950	NC_037638.1	18899517	intron	gene1127
peak1086	peak1086	peak1086									peak951	NC_037638.1	18903896	intron	gene1127
peak1887	peak1887	peak1887									peak952	NC_037638.1	18906149	intron	gene1127
peak6969	peak6969	peak6969									peak953	NC_037638.1	18916682	intron	gene1127
peak247	peak247	peak247									peak954	NC_037638.1	18929522	upstream	gene1129
peak4730	peak4730	peak4730									peak955	NC_037638.1	18930366	upstream	gene1129
peak11154	peak11154	peak11154									peak956	NC_037638.1	18933358	promoter	gene1129
peak3593	peak3593	peak3593									peak957	NC_037638.1	18934399	exon	gene1129
peak2117	peak2117	peak2117									peak958	NC_037638.1	19130348	intron	gene1129
peak2483	peak2483	peak2483									peak959	NC_037638.1	19154495	intron	gene1131
peak8583	peak8583	peak8583									peak960	NC_037638.1	19156017	intron	gene1131
peak5009	peak5009	peak5009									peak961	NC_037638.1	19158242	intron	gene1131
peak589	peak589	peak589									peak962	NC_037638.1	19159030	intron	gene1131
peak10740	peak10740	peak10740									peak963	NC_037638.1	19172362	intron	gene1131
peak7044	peak7044	peak7044									peak964	NC_037638.1	19174034	intron	gene1131
peak7312	peak7312	peak7312									peak965	NC_037638.1	19238134	intron	gene1132
peak8206	peak8206	peak8206									peak966	NC_037638.1	19239573	intron	gene1132
peak2310	peak2310	peak2310									peak967	NC_037638.1	19272021	intron	gene1132
peak7739	peak7739	peak7739									peak968	NC_037638.1	19295284	five_utr	gene1132
peak1849	peak1849	peak1849									peak969	NC_037638.1	19313019	promoter	gene1134
peak5955	peak5955	peak5955									peak970	NC_037638.1	19332844	five_utr	gene1135
peak2696	peak2696	peak2696									peak971	NC_037638.1	19340958	intron	gene1136
peak2605	peak2605	peak2605									peak972	NC_037638.1	19345326	upstream	gene1137
peak1182	peak1182	peak1182									peak973	NC_037638.1	19347630	five_utr	gene1139
peak6371	peak6371	peak6371									peak974	NC_037638.1	19370808	promoter	gene1146
peak659	peak659	peak659									peak975	NC_037638.1	19414086	intron	gene1147
peak132	peak132	peak132									peak976	NC_037638.1	19418591	intron	gene1147
peak7121	peak7121	peak7121									peak977	NC_037638.1	19422691	intron	gene1147
peak8226	peak8226	peak8226									peak978	NC_037638.1	19424013	promoter	gene1148
peak3477	peak3477	peak3477									peak979	NC_037638.1	19425638	five_utr	gene1148
peak6418	peak6418	peak6418									peak980	NC_037638.1	19432269	exon	gene1148
peak7845	peak7845	peak7845									peak981	NC_037638.1	19434117	intron	gene1147
peak33	peak33	peak33									peak982	NC_037638.1	19445937	exon	gene1150
peak5002	peak5002	peak5002									peak983	NC_037638.1	19446661	promoter	gene1150
peak10634	peak10634	peak10634									peak984	NC_037638.1	19452231	promoter	gene1151
peak2035	peak2035	peak2035									peak985	NC_037638.1	19467346	promoter	gene1154
peak10458	peak10458	peak10458									peak986	NC_037638.1	19556286	five_utr	gene1156
peak10107	peak10107	peak10107									peak987	NC_037638.1	19557282	promoter	gene1156
peak3445	peak3445	peak3445									peak988	NC_037638.1	19558275	three_utr	gene1157
peak2590	peak2590	peak2590									peak989	NC_037638.1	19567348	exon	gene1157
peak6523	peak6523	peak6523									peak990	NC_037638.1	19567712	intron	gene1157
peak10697	peak10697	peak10697									peak991	NC_037638.1	19570711	intron	gene1157
peak4740	peak4740	peak4740									peak992	NC_037638.1	19573226	intron	gene1157
peak4068	peak4068	peak4068									peak993	NC_037638.1	19577753	intron	gene1157
peak5842	peak5842	peak5842									peak994	NC_037638.1	19582836	promoter	gene1157
peak230	peak230	peak230									peak995	NC_037638.1	19592638	promoter	gene1160
peak7148	peak7148	peak7148									peak996	NC_037638.1	19615768	intron	gene1162
peak7111	peak7111	peak7111									peak997	NC_037638.1	19621280	downstream	gene1162
peak1033	peak1033	peak1033									peak998	NC_037638.1	19623918	downstream	gene1162
peak5408	peak5408	peak5408									peak999	NC_037638.1	19625017	promoter	gene1162
peak5254	peak5254	peak5254									peak1000	NC_037638.1	19651843	intergenic	NA
peak2881	peak2881	peak2881									peak1001	NC_037638.1	19664886	upstream	gene1163
peak5407	peak5407	peak5407									peak1002	NC_037638.1	19773196	five_utr	gene1167
peak4152	peak4152	peak4152									peak1003	NC_037638.1	19780006	five_utr	gene1170
peak416	peak416	peak416									peak1004	NC_037638.1	19786926	five_utr	gene1173
peak5504	peak5504	peak5504									peak1005	NC_037638.1	19801229	intron	gene1176
peak1644	peak1644										peak1006	NC_037638.1	19827238	five_utr	gene1176
peak8334	peak8334										peak1007	NC_037638.1	19838127	intron	gene1176
peak5400	peak5400										peak1008	NC_037638.1	19873877	intron	gene1176
peak4825	peak4825										peak1009	NC_037638.1	19900064	intron	gene1176
peak8021	peak8021										peak1010	NC_037638.1	19908376	intron	gene1176
peak5468	peak5468										peak1011	NC_037638.1	19981213	intron	gene1178
peak2585	peak2585										peak1012	NC_037638.1	19981938	intron	gene1178
peak9036	peak9036										peak1013	NC_037638.1	19982609	intron	gene1178
peak4187	peak4187										peak1014	NC_037638.1	19984018	intron	gene1178
peak2743	peak2743										peak1015	NC_037638.1	20002920	intron	gene1178
peak1224	peak1224										peak1016	NC_037638.1	20025654	intron	gene1178
peak9410	peak9410										peak1017	NC_037638.1	20026409	five_utr	gene1178
peak8368	peak8368										peak1018	NC_037638.1	20028150	three_utr	gene1179
peak6053	peak6053										peak1019	NC_037638.1	20039756	promoter	gene1179
peak7661	peak7661										peak1020	NC_037638.1	20092848	upstream	gene1180
peak5565	peak5565										peak1021	NC_037638.1	20110887	five_utr	gene1184
peak8375	peak8375										peak1022	NC_037638.1	20112187	intron	gene1185
peak7028	peak7028										peak1023	NC_037638.1	20142280	promoter	gene1193
peak948	peak948										peak1024	NC_037638.1	20146068	intron	gene1194
peak7352	peak7352										peak1025	NC_037638.1	20257447	intron	gene1195
peak7013	peak7013										peak1026	NC_037638.1	20268114	five_utr	gene1197
peak3459	peak3459										peak1027	NC_037638.1	20273668	promoter	gene1199
peak1527	peak1527										peak1028	NC_037638.1	20276431	exon	gene1200
peak8816	peak8816										peak1029	NC_037638.1	20280257	three_utr	gene1201
peak4175	peak4175										peak1030	NC_037638.1	20308293	intron	gene1201
peak5477	peak5477										peak1031	NC_037638.1	20311631	intron	gene1201
peak10172	peak10172										peak1032	NC_037638.1	20334503	promoter	gene1201
peak8378	peak8378										peak1033	NC_037638.1	20340132	upstream	gene1201
peak6214	peak6214										peak1034	NC_037638.1	20343544	upstream	gene1201
peak2319	peak2319										peak1035	NC_037638.1	20347895	upstream	gene1202
peak5252	peak5252										peak1036	NC_037638.1	20348241	promoter	gene1202
peak10509	peak10509										peak1037	NC_037638.1	20349242	five_utr	gene1202
peak7421	peak7421										peak1038	NC_037638.1	20413597	upstream	gene1203
peak8341	peak8341										peak1039	NC_037638.1	20415723	intron	gene1203
peak6366	peak6366										peak1040	NC_037638.1	20417258	intron	gene1203
peak5301	peak5301										peak1041	NC_037638.1	20421488	intron	gene1203
peak1267	peak1267										peak1042	NC_037638.1	20473579	five_utr	gene1205
peak1584	peak1584										peak1043	NC_037638.1	20510094	five_utr	gene1207
peak894	peak894										peak1044	NC_037638.1	20515299	five_utr	gene1209
peak7374	peak7374										peak1045	NC_037638.1	20540199	promoter	gene1210
peak9125	peak9125										peak1046	NC_037638.1	20556196	promoter	gene1213
peak432	peak432										peak1047	NC_037638.1	20557767	promoter	gene1215
peak7197	peak7197										peak1048	NC_037638.1	20580933	promoter	gene1221
peak4150	peak4150										peak1049	NC_037638.1	20590252	promoter	gene1223
peak5968	peak5968										peak1050	NC_037638.1	20590705	promoter	gene1223
peak1953	peak1953										peak1051	NC_037638.1	20671409	promoter	gene1243
peak6528	peak6528										peak1052	NC_037638.1	20715705	intron	gene1246
peak6487	peak6487										peak1053	NC_037638.1	20865836	intron	gene1246
peak6812	peak6812										peak1054	NC_037638.1	20867688	intron	gene1246
peak10961	peak10961										peak1055	NC_037638.1	20868943	intron	gene1246
peak10620	peak10620										peak1056	NC_037638.1	20998779	intron	gene1246
peak5547	peak5547										peak1057	NC_037638.1	21020778	intron	gene1251
peak8220	peak8220										peak1058	NC_037638.1	21032325	intron	gene1255
peak8204	peak8204										peak1059	NC_037638.1	21095792	intron	gene1260
peak7864	peak7864										peak1060	NC_037638.1	21132427	intron	gene1260
peak10916	peak10916										peak1061	NC_037638.1	21147177	intron	gene1260
peak1578	peak1578										peak1062	NC_037638.1	21163565	intron	gene1260
peak2305	peak2305										peak1063	NC_037638.1	21194718	intron	gene1260
peak394	peak394										peak1064	NC_037638.1	21196002	intron	gene1260
peak9648	peak9648										peak1065	NC_037638.1	21219687	intron	gene1260
peak7128	peak7128										peak1066	NC_037638.1	21248445	intron	gene1260
peak3916	peak3916										peak1067	NC_037638.1	21297690	intron	gene1260
peak8325	peak8325										peak1068	NC_037638.1	21312510	intron	gene1260
peak10873	peak10873										peak1069	NC_037638.1	21324711	intron	gene1260
peak9417	peak9417										peak1070	NC_037638.1	21419774	intron	gene1260
peak3849	peak3849										peak1071	NC_037638.1	21471147	upstream	gene1261
peak3137	peak3137										peak1072	NC_037638.1	21473451	promoter	gene1262
peak5693	peak5693										peak1073	NC_037638.1	21489525	promoter	gene1265
peak5106	peak5106										peak1074	NC_037638.1	21494675	promoter	gene1267
peak6075	peak6075										peak1075	NC_037638.1	21500773	five_utr	gene1268
peak10501	peak10501										peak1076	NC_037638.1	21508327	five_utr	gene1269
peak9433	peak9433										peak1077	NC_037638.1	21594167	intron	gene1270
peak9087	peak9087										peak1078	NC_037638.1	21688029	five_utr	gene1270
peak154	peak154										peak1079	NC_037638.1	21690303	exon	gene1272
peak1204	peak1204										peak1080	NC_037638.1	21698219	upstream	gene1272
peak3841	peak3841										peak1081	NC_037638.1	21699322	five_utr	gene1274
peak10858	peak10858										peak1082	NC_037638.1	21729807	promoter	gene1277
peak10845	peak10845										peak1083	NC_037638.1	21732968	intron	gene1278
peak1700	peak1700										peak1084	NC_037638.1	21735133	promoter	gene1278
peak8224	peak8224										peak1085	NC_037638.1	21738660	upstream	gene1278
peak5480	peak5480										peak1086	NC_037638.1	21770985	promoter	gene1282
peak9461	peak9461										peak1087	NC_037638.1	21772542	upstream	gene1282
peak7411	peak7411										peak1088	NC_037638.1	21786434	promoter	gene1284
peak2716	peak2716										peak1089	NC_037638.1	21814617	exon	gene1288
peak5972	peak5972										peak1090	NC_037638.1	22011705	intron	gene1289
peak1963	peak1963										peak1091	NC_037638.1	22012486	intron	gene1289
peak9155	peak9155										peak1092	NC_037638.1	22013546	intron	gene1289
peak10508	peak10508										peak1093	NC_037638.1	22014000	intron	gene1289
peak8922	peak8922										peak1094	NC_037638.1	22016515	intron	gene1289
peak10900	peak10900										peak1095	NC_037638.1	22024450	intron	gene1289
peak38	peak38										peak1096	NC_037638.1	22110755	intron	gene1289
peak9451	peak9451										peak1097	NC_037638.1	22111942	downstream	gene1289
peak9728	peak9728										peak1098	NC_037638.1	22140077	downstream	gene1289
peak2776	peak2776										peak1099	NC_037638.1	22174377	downstream	gene1289
peak8225	peak8225										peak1100	NC_037638.1	22174685	downstream	gene1289
peak5965	peak5965										peak1101	NC_037638.1	22175173	downstream	gene1289
peak1900	peak1900										peak1102	NC_037638.1	22182682	promoter	gene1289
peak5966	peak5966										peak1103	NC_037638.1	22210552	downstream	gene1290
peak5739	peak5739										peak1104	NC_037638.1	22335184	downstream	gene1290
peak9667	peak9667										peak1105	NC_037638.1	22352887	downstream	gene1290
peak2564	peak2564										peak1106	NC_037638.1	22354076	downstream	gene1290
peak5422	peak5422										peak1107	NC_037638.1	22390399	downstream	gene1290
peak5695	peak5695										peak1108	NC_037638.1	22393117	downstream	gene1290
peak1175	peak1175										peak1109	NC_037638.1	22393661	downstream	gene1290
peak6907	peak6907										peak1110	NC_037638.1	22394724	downstream	gene1290
peak8158	peak8158										peak1111	NC_037638.1	22395647	downstream	gene1290
peak4195	peak4195										peak1112	NC_037638.1	22477771	intergenic	NA
peak605	peak605										peak1113	NC_037638.1	22578280	intron	gene1291
peak4037	peak4037										peak1114	NC_037638.1	22582640	five_utr	gene1291
peak7611	peak7611										peak1115	NC_037638.1	22608968	promoter	gene1300
peak362	peak362										peak1116	NC_037638.1	22611865	upstream	gene1299
peak979	peak979										peak1117	NC_037638.1	22701993	promoter	gene1302
peak3914	peak3914										peak1118	NC_037638.1	22723857	downstream	gene1303
peak8939	peak8939										peak1119	NC_037638.1	22725405	intron	gene1303
peak9468	peak9468										peak1120	NC_037638.1	22772626	promoter	gene1305
peak1781	peak1781										peak1121	NC_037638.1	22793995	promoter	gene1314
peak4245	peak4245										peak1122	NC_037638.1	22808116	intron	gene1317
peak6832	peak6832										peak1123	NC_037638.1	22826671	promoter	gene1320
peak3463	peak3463										peak1124	NC_037638.1	23175161	downstream	gene1323
peak7539	peak7539										peak1125	NC_037638.1	23176462	downstream	gene1323
peak1743	peak1743										peak1126	NC_037638.1	23183704	intergenic	NA
peak3212	peak3212										peak1127	NC_037638.1	23197774	promoter	gene1324
peak4609	peak4609										peak1128	NC_037638.1	23198652	intron	gene1324
peak9055	peak9055										peak1129	NC_037638.1	23199264	intron	gene1324
peak5467	peak5467										peak1130	NC_037638.1	23211494	intron	gene1325
peak5134	peak5134										peak1131	NC_037638.1	23212310	intron	gene1325
peak5465	peak5465										peak1132	NC_037638.1	23242259	intron	gene1325
peak10455	peak10455										peak1133	NC_037638.1	23256244	promoter	gene1332
peak6115	peak6115										peak1134	NC_037638.1	23256892	promoter	gene1331
peak3929	peak3929										peak1135	NC_037638.1	23262106	five_utr	gene1333
peak2622	peak2622										peak1136	NC_037638.1	23267364	promoter	gene1334
peak10635	peak10635										peak1137	NC_037638.1	23272074	three_utr	gene1335
peak2849	peak2849										peak1138	NC_037638.1	23277193	downstream	gene1335
peak3408	peak3408										peak1139	NC_037638.1	23278271	downstream	gene1335
peak1550	peak1550										peak1140	NC_037638.1	23301874	downstream	gene1335
peak7019	peak7019										peak1141	NC_037638.1	23311091	five_utr	gene1336
peak8240	peak8240										peak1142	NC_037638.1	23332310	intron	gene1338
peak3544	peak3544										peak1143	NC_037638.1	23360883	intron	gene1338
peak6055	peak6055										peak1144	NC_037638.1	23361763	intron	gene1338
peak4257	peak4257										peak1145	NC_037638.1	23381607	five_utr	gene1339
peak5684	peak5684										peak1146	NC_037638.1	23445638	upstream	gene1340
peak4202	peak4202										peak1147	NC_037638.1	23453690	downstream	gene1341
peak4293	peak4293										peak1148	NC_037638.1	23467932	three_utr	gene1343
peak4766	peak4766										peak1149	NC_037638.1	23523552	intron	gene1343
peak3540	peak3540										peak1150	NC_037638.1	23524241	intron	gene1343
peak10253	peak10253										peak1151	NC_037638.1	23551455	intron	gene1343
peak10020	peak10020										peak1152	NC_037638.1	23575053	intron	gene1343
peak5148	peak5148										peak1153	NC_037638.1	23683260	five_utr	gene1343
peak3888	peak3888										peak1154	NC_037638.1	23800045	five_utr	gene1346
peak9346	peak9346										peak1155	NC_037638.1	23807611	intron	gene1348
peak5201	peak5201										peak1156	NC_037638.1	23811421	exon	gene1348
peak5282	peak5282										peak1157	NC_037638.1	23812353	downstream	gene1349
peak8293	peak8293										peak1158	NC_037638.1	23903441	intron	gene1349
peak10641	peak10641										peak1159	NC_037638.1	23931811	intron	gene1349
peak1229	peak1229										peak1160	NC_037638.1	23950636	intron	gene1349
peak5250	peak5250										peak1161	NC_037638.1	23962990	intron	gene1349
peak726	peak726										peak1162	NC_037638.1	24008844	intron	gene1349
peak863	peak863										peak1163	NC_037638.1	24031180	intron	gene1349
peak1221	peak1221										peak1164	NC_037638.1	24041229	intron	gene1349
peak4739	peak4739										peak1165	NC_037638.1	24054992	intron	gene1349
peak9084	peak9084										peak1166	NC_037638.1	24081325	intron	gene1349
peak4964	peak4964										peak1167	NC_037638.1	24096310	exon	gene1354
peak5784	peak5784										peak1168	NC_037638.1	24097768	promoter	gene1355
peak8445	peak8445										peak1169	NC_037638.1	24098729	five_utr	gene1354
peak8756	peak8756										peak1170	NC_037638.1	24104784	downstream	gene1356
peak10571	peak10571										peak1171	NC_037638.1	24108231	promoter	gene1354
peak7451	peak7451										peak1172	NC_037638.1	24117634	five_utr	gene1356
peak8338	peak8338										peak1173	NC_037638.1	24121985	promoter	gene1358
peak9702	peak9702										peak1174	NC_037638.1	24122815	promoter	gene1357
peak9413	peak9413										peak1175	NC_037638.1	24136196	intron	gene1359
peak60	peak60										peak1176	NC_037638.1	24158027	five_utr	gene1363
peak6904	peak6904										peak1177	NC_037638.1	24159284	five_utr	gene1364
peak4089	peak4089										peak1178	NC_037638.1	24169057	promoter	gene1366
peak11049	peak11049										peak1179	NC_037638.1	24183184	promoter	gene1369
peak10836	peak10836										peak1180	NC_037638.1	24187886	promoter	gene1370
peak4182	peak4182										peak1181	NC_037638.1	24196025	promoter	gene1371
peak7233	peak7233										peak1182	NC_037638.1	24205045	five_utr	gene1373
peak5507	peak5507										peak1183	NC_037638.1	24228485	intron	gene1376
peak1450	peak1450										peak1184	NC_037638.1	24238003	promoter	gene1377
peak1576	peak1576										peak1185	NC_037638.1	24246118	promoter	gene1379
peak9385	peak9385										peak1186	NC_037638.1	24246645	promoter	gene1379
peak7625	peak7625										peak1187	NC_037638.1	24254717	five_utr	gene1381
peak2649	peak2649										peak1188	NC_037638.1	24257613	promoter	gene1382
peak2887	peak2887										peak1189	NC_037638.1	24258175	promoter	gene1382
peak3246	peak3246										peak1190	NC_037638.1	24278256	promoter	gene1384
peak3787	peak3787										peak1191	NC_037638.1	24307375	intron	gene1390
peak10603	peak10603										peak1192	NC_037638.1	24383367	promoter	gene1390
peak9632	peak9632										peak1193	NC_037638.1	24387192	upstream	gene1390
peak5051	peak5051										peak1194	NC_037638.1	24391799	upstream	gene1390
peak5829	peak5829										peak1195	NC_037638.1	24393011	upstream	gene1390
peak3989	peak3989										peak1196	NC_037638.1	24395814	three_utr	gene1392
peak2475	peak2475										peak1197	NC_037638.1	24396769	three_utr	gene1392
peak398	peak398										peak1198	NC_037638.1	24414166	exon	gene1392
peak7048	peak7048										peak1199	NC_037638.1	24427869	intron	gene1392
peak6782	peak6782										peak1200	NC_037638.1	24433385	intron	gene1392
peak4005	peak4005										peak1201	NC_037638.1	24435917	intron	gene1392
peak7792	peak7792										peak1202	NC_037638.1	24437285	intron	gene1392
peak8098	peak8098										peak1203	NC_037638.1	24441027	intron	gene1392
peak6902	peak6902										peak1204	NC_037638.1	24450495	intron	gene1392
peak720	peak720										peak1205	NC_037638.1	24458157	intron	gene1392
peak2389	peak2389										peak1206	NC_037638.1	24464637	intron	gene1392
peak819	peak819										peak1207	NC_037638.1	24466025	intron	gene1392
peak1842	peak1842										peak1208	NC_037638.1	24472605	intron	gene1392
peak4844	peak4844										peak1209	NC_037638.1	24477487	intron	gene1392
peak4031	peak4031										peak1210	NC_037638.1	24478429	intron	gene1392
peak7106	peak7106										peak1211	NC_037638.1	24481699	intron	gene1392
peak10136	peak10136										peak1212	NC_037638.1	24489512	intron	gene1392
peak1234	peak1234										peak1213	NC_037638.1	24496236	intron	gene1392
peak10032	peak10032										peak1214	NC_037638.1	24499187	intron	gene1392
peak4146	peak4146										peak1215	NC_037638.1	24506062	intron	gene1392
peak5904	peak5904										peak1216	NC_037638.1	24520522	intron	gene1392
peak1160	peak1160										peak1217	NC_037638.1	24529085	intron	gene1392
peak268	peak268										peak1218	NC_037638.1	24533094	five_utr	gene1392
peak6959	peak6959										peak1219	NC_037638.1	24535389	upstream	gene1395
peak3513	peak3513										peak1220	NC_037638.1	24536536	upstream	gene1395
peak4815	peak4815										peak1221	NC_037638.1	24537154	upstream	gene1392
peak2952	peak2952										peak1222	NC_037638.1	24550277	upstream	gene1393
peak5837	peak5837										peak1223	NC_037638.1	24576198	upstream	gene1398
peak7017	peak7017										peak1224	NC_037638.1	24577879	promoter	gene1398
peak8458	peak8458										peak1225	NC_037638.1	24583293	intron	gene1398
peak5740	peak5740										peak1226	NC_037638.1	24593123	intron	gene1398
peak6912	peak6912										peak1227	NC_037638.1	24594104	exon	gene1398
peak4154	peak4154										peak1228	NC_037638.1	24596508	intron	gene1398
peak6322	peak6322										peak1229	NC_037638.1	24623087	promoter	gene1401
peak1222	peak1222										peak1230	NC_037638.1	24630354	promoter	gene1403
peak9873	peak9873										peak1231	NC_037638.1	24637372	promoter	gene1405
peak8973	peak8973										peak1232	NC_037638.1	24667834	promoter	gene1408
peak639	peak639										peak1233	NC_037638.1	24669090	five_utr	gene1408
peak10918	peak10918										peak1234	NC_037638.1	24681945	five_utr	gene1409
peak2566	peak2566										peak1235	NC_037638.1	24682983	promoter	gene1409
peak7036	peak7036										peak1236	NC_037638.1	24871655	upstream	gene1412
peak9610	peak9610										peak1237	NC_037638.1	24904337	intron	gene1413
peak6604	peak6604										peak1238	NC_037638.1	24906750	intron	gene1413
peak10082	peak10082										peak1239	NC_037638.1	24927359	intron	gene1413
peak7732	peak7732										peak1240	NC_037638.1	24958173	downstream	gene1416
peak5195	peak5195										peak1241	NC_037638.1	24967691	intron	gene1416
peak7986	peak7986										peak1242	NC_037638.1	24968561	intron	gene1416
peak2067	peak2067										peak1243	NC_037638.1	24969761	exon	gene1416
peak9178	peak9178										peak1244	NC_037638.1	24974404	promoter	gene1417
peak9577	peak9577										peak1245	NC_037638.1	24975990	intron	gene1418
peak6036	peak6036										peak1246	NC_037638.1	24991143	intron	gene1420
peak5685	peak5685										peak1247	NC_037638.1	24992717	intron	gene1420
peak11062	peak11062										peak1248	NC_037638.1	25009185	intron	gene1420
peak2740	peak2740										peak1249	NC_037638.1	25010411	intron	gene1420
peak10827	peak10827										peak1250	NC_037638.1	25012681	intron	gene1420
peak5747	peak5747										peak1251	NC_037638.1	25013169	five_utr	gene1420
peak3788	peak3788										peak1252	NC_037638.1	25044040	five_utr	gene1423
peak844	peak844										peak1253	NC_037638.1	25047990	promoter	gene1425
peak9659	peak9659										peak1254	NC_037638.1	25056396	promoter	gene1428
peak912	peak912										peak1255	NC_037638.1	25074800	promoter	gene1435
peak5236	peak5236										peak1256	NC_037638.1	25245479	intron	gene1464
peak6717	peak6717										peak1257	NC_037638.1	25246334	intron	gene1464
peak2871	peak2871										peak1258	NC_037638.1	25269624	five_utr	gene1467
peak6501	peak6501										peak1259	NC_037638.1	25273729	five_utr	gene1469
peak9426	peak9426										peak1260	NC_037638.1	25314105	promoter	gene1473
peak10981	peak10981										peak1261	NC_037638.1	25332115	exon	gene1477
peak4674	peak4674										peak1262	NC_037638.1	25347228	five_utr	gene1478
peak8246	peak8246										peak1263	NC_037638.1	25350204	upstream	gene1479
peak1654	peak1654										peak1264	NC_037638.1	25395574	five_utr	gene1480
peak11051	peak11051										peak1265	NC_037638.1	25407932	intron	gene1480
peak10859	peak10859										peak1266	NC_037638.1	25435293	intron	gene1480
peak8566	peak8566										peak1267	NC_037638.1	25552849	intron	gene1482
peak9570	peak9570										peak1268	NC_037638.1	25588783	upstream	gene1482
peak1714	peak1714										peak1269	NC_037638.1	25614925	intergenic	NA
peak5014	peak5014										peak1270	NC_037638.1	25615881	intergenic	NA
peak1927	peak1927										peak1271	NC_037638.1	25620469	intergenic	NA
peak7637	peak7637										peak1272	NC_037638.1	25623143	intergenic	NA
peak2595	peak2595										peak1273	NC_037638.1	25633214	downstream	gene1484
peak783	peak783										peak1274	NC_037638.1	25641218	exon	gene1484
peak7502	peak7502										peak1275	NC_037638.1	25724617	intron	gene1484
peak6635	peak6635										peak1276	NC_037638.1	25729075	intron	gene1484
peak9423	peak9423										peak1277	NC_037638.1	25811200	intron	gene1484
peak7134	peak7134										peak1278	NC_037638.1	25813409	intron	gene1484
peak7935	peak7935										peak1279	NC_037638.1	25825530	five_utr	gene1484
peak9099	peak9099										peak1280	NC_037638.1	25840346	promoter	gene1489
peak6077	peak6077										peak1281	NC_037638.1	25847005	promoter	gene1490
peak5569	peak5569										peak1282	NC_037638.1	25849233	intron	gene1491
peak6129	peak6129										peak1283	NC_037638.1	25850771	exon	gene1491
peak10368	peak10368										peak1284	NC_037638.1	25898942	promoter	gene1494
peak6326	peak6326										peak1285	NC_037638.1	25899308	five_utr	gene1494
peak7064	peak7064										peak1286	NC_037638.1	25912263	exon	gene1497
peak4012	peak4012										peak1287	NC_037638.1	25935676	promoter	gene1500
peak1713	peak1713										peak1288	NC_037638.1	25944240	promoter	gene1503
peak4125	peak4125										peak1289	NC_037638.1	25959004	intron	gene1503
peak5010	peak5010										peak1290	NC_037638.1	25998081	intron	gene1503
peak11068	peak11068										peak1291	NC_037638.1	26085487	downstream	gene1503
peak12	peak12										peak1292	NC_037638.1	26086168	downstream	gene1505
peak10618	peak10618										peak1293	NC_037638.1	26089968	downstream	gene1506
peak1249	peak1249										peak1294	NC_037638.1	26183609	five_utr	gene1508
peak9595	peak9595										peak1295	NC_037638.1	26196157	five_utr	gene1511
peak2278	peak2278										peak1296	NC_037638.1	26201307	intron	gene1512
peak8811	peak8811										peak1297	NC_037638.1	26203058	exon	gene1512
peak4250	peak4250										peak1298	NC_037638.1	26205759	five_utr	gene1512
peak5746	peak5746										peak1299	NC_037638.1	26329611	intergenic	NA
peak7476	peak7476										peak1300	NC_037638.1	26346826	upstream	gene1517
peak4275	peak4275										peak1301	NC_037638.1	26348216	upstream	gene1517
peak2686	peak2686										peak1302	NC_037638.1	26457193	intron	gene1517
peak2909	peak2909										peak1303	NC_037638.1	26485649	intron	gene1517
peak4713	peak4713										peak1304	NC_037638.1	26514547	intron	gene1517
peak4726	peak4726										peak1305	NC_037638.1	26529552	intron	gene1517
peak4842	peak4842										peak1306	NC_037638.1	26599770	intron	gene1517
peak7291	peak7291										peak1307	NC_037638.1	26615887	intron	gene1517
peak7567	peak7567										peak1308	NC_037638.1	26627845	intron	gene1517
peak4605	peak4605										peak1309	NC_037638.1	26651032	intron	gene1517
peak7066	peak7066										peak1310	NC_037638.1	26688150	intron	gene1517
peak4922	peak4922										peak1311	NC_037638.1	26745614	intron	gene1517
peak7076	peak7076										peak1312	NC_037638.1	26781655	intron	gene1517
peak7256	peak7256										peak1313	NC_037638.1	26832115	five_utr	gene1519
peak7919	peak7919										peak1314	NC_037638.1	26843236	promoter	gene1521
peak9672	peak9672										peak1315	NC_037638.1	26849436	promoter	gene1522
peak6791	peak6791										peak1316	NC_037638.1	26860344	three_utr	gene1523
peak6744	peak6744										peak1317	NC_037638.1	26946450	downstream	gene1525
peak8247	peak8247										peak1318	NC_037638.1	26959857	downstream	gene1525
peak1867	peak1867										peak1319	NC_037638.1	26972292	downstream	gene1525
peak2474	peak2474										peak1320	NC_037638.1	26986464	intergenic	NA
peak6934	peak6934										peak1321	NC_037638.1	26989342	intergenic	NA
peak2354	peak2354										peak1322	NC_037638.1	26992061	intergenic	NA
peak3873	peak3873										peak1323	NC_037638.1	27012321	upstream	gene1526
peak2917	peak2917										peak1324	NC_037638.1	27084291	intron	gene1527
peak7742	peak7742										peak1325	NC_037638.1	27113462	downstream	gene1528
peak9010	peak9010										peak1326	NC_037638.1	27126644	intergenic	NA
peak3785	peak3785										peak1327	NC_037638.1	27139434	upstream	gene1529
peak8164	peak8164										peak1328	NC_037638.1	27197793	promoter	gene1530
peak4214	peak4214										peak1329	NC_037638.1	27245402	promoter	gene1531
peak519	peak519										peak1330	NC_037638.1	27315263	downstream	gene1531
peak7065	peak7065										peak1331	NC_037638.1	27315890	downstream	gene1532
peak7641	peak7641										peak1332	NC_037638.1	27317566	downstream	gene1532
peak4933	peak4933										peak1333	NC_037638.1	27382847	intron	gene1533
peak4935	peak4935										peak1334	NC_037638.1	27383185	intron	gene1533
peak1312	peak1312										peak1335	NC_037638.1	27395250	intron	gene1533
peak5151	peak5151										peak1336	NC_037638.1	27419602	five_utr	gene1533
peak1252	peak1252										peak1337	NC_037638.1	27423921	upstream	gene1533
peak3017	peak3017										peak1338	NC_037638.1	27443201	intron	gene1534
peak1764	peak1764										peak1339	NC_037638.1	27465846	intron	gene1534
peak2636	peak2636										peak1340	NC_037638.1	27478069	intron	gene1537
peak9446	peak9446										peak1341	NC_037638.1	27483284	intron	gene1537
peak3885	peak3885										peak1342	NC_037638.1	27486805	five_utr	gene1538
peak1729	peak1729										peak1343	NC_037638.1	27530477	intron	gene1537
peak5182	peak5182										peak1344	NC_037638.1	27544434	intron	gene1537
peak1747	peak1747										peak1345	NC_037638.1	27546056	promoter	gene1537
peak10866	peak10866										peak1346	NC_037638.1	27547340	upstream	gene1537
peak6690	peak6690										peak1347	NC_037638.1	27548240	upstream	gene1537
peak2024	peak2024										peak1348	NC_037638.1	27555876	intron	gene1539
peak264	peak264										peak1349	NC_037638.1	27557909	intron	gene1539
peak6713	peak6713										peak1350	NC_037638.1	27562307	intron	gene1539
peak10033	peak10033										peak1351	NC_037638.1	27564395	promoter	gene1540
peak8011	peak8011										peak1352	NC_037638.1	27568783	upstream	gene1541
peak9751	peak9751										peak1353	NC_037638.1	27586352	exon	gene1544
peak5121	peak5121										peak1354	NC_037638.1	27591332	intron	gene1546
peak2847	peak2847										peak1355	NC_037638.1	27637037	intron	gene1546
peak3241	peak3241										peak1356	NC_037638.1	27701420	intron	gene1547
peak1752	peak1752										peak1357	NC_037638.1	27722557	promoter	gene1549
peak3373	peak3373										peak1358	NC_037638.1	27736444	five_utr	gene1551
peak8014	peak8014										peak1359	NC_037638.1	27739810	promoter	gene1552
peak1072	peak1072										peak1360	NC_037638.1	27741795	upstream	gene1551
peak9080	peak9080										peak1361	NC_037638.1	27748341	upstream	gene1552
peak2401	peak2401										peak1362	NC_037638.1	27749440	upstream	gene1552
peak9045	peak9045										peak1363	NC_037638.1	27753443	intergenic	NA
peak1809	peak1809										peak1364	NC_037639.1	7105	intergenic	NA
peak10026	peak10026										peak1365	NC_037639.1	14420	downstream	gene1554
peak2941	peak2941										peak1366	NC_037639.1	15165	downstream	gene1553
peak812	peak812										peak1367	NC_037639.1	15727	downstream	gene1554
peak5606	peak5606										peak1368	NC_037639.1	44136	intron	gene1555
peak809	peak809										peak1369	NC_037639.1	54083	five_utr	gene1556
peak2266	peak2266										peak1370	NC_037639.1	56067	five_utr	gene1557
peak6788	peak6788										peak1371	NC_037639.1	112044	promoter	gene1564
peak5436	peak5436										peak1372	NC_037639.1	143984	intron	gene1565
peak4952	peak4952										peak1373	NC_037639.1	167230	intron	gene1567
peak5903	peak5903										peak1374	NC_037639.1	186933	intron	gene1567
peak8567	peak8567										peak1375	NC_037639.1	190022	promoter	gene1568
peak4559	peak4559										peak1376	NC_037639.1	190782	promoter	gene1567
peak11048	peak11048										peak1377	NC_037639.1	237736	exon	gene1568
peak815	peak815										peak1378	NC_037639.1	283599	exon	gene1571
peak8507	peak8507										peak1379	NC_037639.1	375292	downstream	gene1576
peak39	peak39										peak1380	NC_037639.1	376579	downstream	gene1576
peak796	peak796										peak1381	NC_037639.1	381478	three_utr	gene1576
peak6817	peak6817										peak1382	NC_037639.1	386274	intron	gene1576
peak4458	peak4458										peak1383	NC_037639.1	387040	intron	gene1576
peak8695	peak8695										peak1384	NC_037639.1	401258	intron	gene1576
peak8952	peak8952										peak1385	NC_037639.1	429349	intron	gene1576
peak5358	peak5358										peak1386	NC_037639.1	437066	intron	gene1576
peak8820	peak8820										peak1387	NC_037639.1	453329	intron	gene1576
peak7921	peak7921										peak1388	NC_037639.1	469438	intron	gene1576
peak5518	peak5518										peak1389	NC_037639.1	470018	intron	gene1576
peak4778	peak4778										peak1390	NC_037639.1	477655	intron	gene1576
peak9593	peak9593										peak1391	NC_037639.1	495919	intron	gene1576
peak6533	peak6533										peak1392	NC_037639.1	528307	intron	gene1576
peak1314	peak1314										peak1393	NC_037639.1	552257	exon	gene1576
peak9578	peak9578										peak1394	NC_037639.1	553492	five_utr	gene1576
peak9707	peak9707										peak1395	NC_037639.1	563494	intron	gene1582
peak10018	peak10018										peak1396	NC_037639.1	586230	five_utr	gene1582
peak4008	peak4008										peak1397	NC_037639.1	597063	five_utr	gene1584
peak11036	peak11036										peak1398	NC_037639.1	630070	exon	gene1585
peak9009	peak9009										peak1399	NC_037639.1	715263	intron	gene1587
peak3884	peak3884										peak1400	NC_037639.1	721302	exon	gene1587
peak7018	peak7018										peak1401	NC_037639.1	725837	five_utr	gene1588
peak4151	peak4151										peak1402	NC_037639.1	732923	five_utr	gene1589
peak8978	peak8978										peak1403	NC_037639.1	734412	five_utr	gene1590
peak4836	peak4836										peak1404	NC_037639.1	742266	intron	gene1590
peak2445	peak2445										peak1405	NC_037639.1	745962	intron	gene1590
peak4047	peak4047										peak1406	NC_037639.1	746668	intron	gene1590
peak6229	peak6229										peak1407	NC_037639.1	754026	intron	gene1590
peak5200	peak5200										peak1408	NC_037639.1	760370	intron	gene1590
peak4354	peak4354										peak1409	NC_037639.1	802524	intron	gene1590
peak1143	peak1143										peak1410	NC_037639.1	859211	intron	gene1590
peak4046	peak4046										peak1411	NC_037639.1	869272	five_utr	gene1591
peak8198	peak8198										peak1412	NC_037639.1	870634	three_utr	gene1591
peak4286	peak4286										peak1413	NC_037639.1	871820	three_utr	gene1591
peak2655	peak2655										peak1414	NC_037639.1	876059	intron	gene1590
peak7240	peak7240										peak1415	NC_037639.1	876369	intron	gene1590
peak3232	peak3232										peak1416	NC_037639.1	957495	intron	gene1590
peak4651	peak4651										peak1417	NC_037639.1	1010293	five_utr	gene1593
peak3908	peak3908										peak1418	NC_037639.1	1113893	upstream	gene1599
peak5519	peak5519										peak1419	NC_037639.1	1315686	intergenic	NA
peak6760	peak6760										peak1420	NC_037639.1	1391012	intergenic	NA
peak9753	peak9753										peak1421	NC_037639.1	1473177	five_utr	gene1605
peak7455	peak7455										peak1422	NC_037639.1	1488670	intron	gene1605
peak1340	peak1340										peak1423	NC_037639.1	1551383	intron	gene1605
peak8190	peak8190										peak1424	NC_037639.1	1623181	upstream	gene1608
peak6334	peak6334										peak1425	NC_037639.1	1648433	five_utr	gene1609
peak5641	peak5641										peak1426	NC_037639.1	1654371	five_utr	gene1610
peak4158	peak4158										peak1427	NC_037639.1	1658884	exon	gene1612
peak5424	peak5424										peak1428	NC_037639.1	1689498	exon	gene1614
peak6352	peak6352										peak1429	NC_037639.1	1695253	upstream	gene1614
peak3198	peak3198										peak1430	NC_037639.1	1700583	intergenic	NA
peak4759	peak4759										peak1431	NC_037639.1	1701761	intergenic	NA
peak3178	peak3178										peak1432	NC_037639.1	1702446	intergenic	NA
peak4397	peak4397										peak1433	NC_037639.1	1702753	intergenic	NA
peak8505	peak8505										peak1434	NC_037639.1	1712424	intergenic	NA
peak1431	peak1431										peak1435	NC_037639.1	1734355	intron	gene1615
peak10069	peak10069										peak1436	NC_037639.1	1739021	exon	gene1615
peak4326	peak4326										peak1437	NC_037639.1	1772156	five_utr	gene1616
peak5810	peak5810										peak1438	NC_037639.1	1772902	promoter	gene1616
peak10884	peak10884										peak1439	NC_037639.1	1912520	five_utr	gene1622
peak4402	peak4402										peak1440	NC_037639.1	1969024	intron	gene1625
peak4779	peak4779										peak1441	NC_037639.1	2021421	intron	gene1626
peak1835	peak1835										peak1442	NC_037639.1	2033568	promoter	gene1628
peak2576	peak2576										peak1443	NC_037639.1	2081741	five_utr	gene1629
peak11066	peak11066										peak1444	NC_037639.1	2141812	intron	gene1631
peak854	peak854										peak1445	NC_037639.1	2267093	five_utr	gene1631
peak6407	peak6407										peak1446	NC_037639.1	2318612	upstream	gene1633
peak1675	peak1675										peak1447	NC_037639.1	2321568	upstream	gene1633
peak5887	peak5887										peak1448	NC_037639.1	2385035	intron	gene1636
peak813	peak813										peak1449	NC_037639.1	2415941	five_utr	gene1638
peak3547	peak3547										peak1450	NC_037639.1	2423638	exon	gene1638
peak10076	peak10076										peak1451	NC_037639.1	2447805	intron	gene1639
peak6475	peak6475										peak1452	NC_037639.1	2482660	promoter	gene1643
peak2086	peak2086										peak1453	NC_037639.1	2517597	upstream	gene1650
peak3001	peak3001										peak1454	NC_037639.1	2542979	exon	gene1652
peak1266	peak1266										peak1455	NC_037639.1	2561326	five_utr	gene1654
peak8723	peak8723										peak1456	NC_037639.1	2583008	intron	gene1657
peak3963	peak3963										peak1457	NC_037639.1	2609862	downstream	gene1658
peak1836	peak1836										peak1458	NC_037639.1	2636685	promoter	gene1660
peak9765	peak9765										peak1459	NC_037639.1	2639737	promoter	gene1659
peak10070	peak10070										peak1460	NC_037639.1	2646167	upstream	gene1659
peak10157	peak10157										peak1461	NC_037639.1	2667040	intergenic	NA
peak320	peak320										peak1462	NC_037639.1	2670565	intergenic	NA
peak451	peak451										peak1463	NC_037639.1	2674188	intergenic	NA
peak640	peak640										peak1464	NC_037639.1	2677561	intergenic	NA
peak9159	peak9159										peak1465	NC_037639.1	2678926	intergenic	NA
peak8163	peak8163										peak1466	NC_037639.1	2684814	intergenic	NA
peak11163	peak11163										peak1467	NC_037639.1	2686653	downstream	gene1661
peak1648	peak1648										peak1468	NC_037639.1	2710417	downstream	gene1661
peak1754	peak1754										peak1469	NC_037639.1	2726057	downstream	gene1661
peak5907	peak5907										peak1470	NC_037639.1	2786741	downstream	gene1661
peak3194	peak3194										peak1471	NC_037639.1	2787252	downstream	gene1661
peak5564	peak5564										peak1472	NC_037639.1	2787716	downstream	gene1661
peak9615	peak9615										peak1473	NC_037639.1	2794527	upstream	gene1661
peak4827	peak4827										peak1474	NC_037639.1	2796017	upstream	gene1661
peak4101	peak4101										peak1475	NC_037639.1	2799419	upstream	gene1661
peak7810	peak7810										peak1476	NC_037639.1	2803732	upstream	gene1662
peak5906	peak5906										peak1477	NC_037639.1	2816779	intron	gene1662
peak472	peak472										peak1478	NC_037639.1	2846342	five_utr	gene1664
peak9904	peak9904										peak1479	NC_037639.1	2897623	intron	gene1669
peak3138	peak3138										peak1480	NC_037639.1	2914592	exon	gene1669
peak8202	peak8202										peak1481	NC_037639.1	2915955	five_utr	gene1669
peak9092	peak9092										peak1482	NC_037639.1	3209086	intron	gene1678
peak1102	peak1102										peak1483	NC_037639.1	3462285	five_utr	gene1678
peak3942	peak3942										peak1484	NC_037639.1	3472318	upstream	gene1678
peak8266	peak8266										peak1485	NC_037639.1	3475680	intergenic	NA
peak6867	peak6867										peak1486	NC_037639.1	3493317	upstream	gene1679
peak10030	peak10030										peak1487	NC_037639.1	3494673	upstream	gene1679
peak4894	peak4894										peak1488	NC_037639.1	3498054	upstream	gene1679
peak2201	peak2201										peak1489	NC_037639.1	3527977	intron	gene1679
peak8244	peak8244										peak1490	NC_037639.1	3586620	intron	gene1679
peak4678	peak4678										peak1491	NC_037639.1	3858540	downstream	gene1679
peak1161	peak1161										peak1492	NC_037639.1	3864828	upstream	gene1681
peak4553	peak4553										peak1493	NC_037639.1	3872120	exon	gene1680
peak4106	peak4106										peak1494	NC_037639.1	3884420	upstream	gene1683
peak1860	peak1860										peak1495	NC_037639.1	3887950	five_utr	gene1684
peak7283	peak7283										peak1496	NC_037639.1	3897819	intron	gene1684
peak11111	peak11111										peak1497	NC_037639.1	3903841	intron	gene1684
peak949	peak949										peak1498	NC_037639.1	3905044	intron	gene1684
peak6087	peak6087										peak1499	NC_037639.1	3936019	five_utr	gene1691
peak2384	peak2384										peak1500	NC_037639.1	3937987	five_utr	gene1692
peak363	peak363										peak1501	NC_037639.1	3945956	promoter	gene1694
peak3782	peak3782										peak1502	NC_037639.1	3952040	upstream	gene1693
peak9833	peak9833										peak1503	NC_037639.1	4004548	intron	gene1696
peak479	peak479										peak1504	NC_037639.1	4005121	intron	gene1696
peak4380	peak4380										peak1505	NC_037639.1	4006174	intron	gene1696
peak2498	peak2498										peak1506	NC_037639.1	4007255	intron	gene1696
peak8821	peak8821										peak1507	NC_037639.1	4039798	intron	gene1696
peak1411	peak1411										peak1508	NC_037639.1	4081950	intron	gene1696
peak7035	peak7035										peak1509	NC_037639.1	4233284	intron	gene1696
peak10061	peak10061										peak1510	NC_037639.1	4364425	intron	gene1696
peak4838	peak4838										peak1511	NC_037639.1	4373102	promoter	gene1702
peak6881	peak6881										peak1512	NC_037639.1	4387677	promoter	gene1704
peak3102	peak3102										peak1513	NC_037639.1	4394887	upstream	gene1704
peak6127	peak6127										peak1514	NC_037639.1	4412570	upstream	gene1705
peak8194	peak8194										peak1515	NC_037639.1	4430041	downstream	gene1705
peak9727	peak9727										peak1516	NC_037639.1	4468224	five_utr	gene1706
peak3489	peak3489										peak1517	NC_037639.1	4469928	promoter	gene1706
peak8766	peak8766										peak1518	NC_037639.1	4472487	promoter	gene1708
peak9823	peak9823										peak1519	NC_037639.1	4473693	intron	gene1708
peak4207	peak4207										peak1520	NC_037639.1	4488849	five_utr	gene1711
peak6335	peak6335										peak1521	NC_037639.1	4545069	upstream	gene1717
peak5820	peak5820										peak1522	NC_037639.1	4547029	promoter	gene1717
peak2419	peak2419										peak1523	NC_037639.1	4566289	promoter	gene1720
peak9265	peak9265										peak1524	NC_037639.1	4615158	intron	gene1722
peak2662	peak2662										peak1525	NC_037639.1	4627629	intron	gene1722
peak9786	peak9786										peak1526	NC_037639.1	4629610	intron	gene1722
peak4006	peak4006										peak1527	NC_037639.1	4630717	promoter	gene1722
peak6686	peak6686										peak1528	NC_037639.1	4649878	exon	gene1724
peak9863	peak9863										peak1529	NC_037639.1	4665764	downstream	gene1725
peak3636	peak3636										peak1530	NC_037639.1	4672884	upstream	gene1725
peak7340	peak7340										peak1531	NC_037639.1	4673354	upstream	gene1727
peak3823	peak3823										peak1532	NC_037639.1	4673892	upstream	gene1725
peak11152	peak11152										peak1533	NC_037639.1	4674797	upstream	gene1725
peak862	peak862										peak1534	NC_037639.1	4676434	upstream	gene1727
peak4292	peak4292										peak1535	NC_037639.1	4676989	upstream	gene1727
peak4680	peak4680										peak1536	NC_037639.1	4677816	exon	gene1726
peak1761	peak1761										peak1537	NC_037639.1	4681418	promoter	gene1726
peak1232	peak1232										peak1538	NC_037639.1	4682808	exon	gene1727
peak3918	peak3918										peak1539	NC_037639.1	4692227	five_utr	gene1729
peak149	peak149										peak1540	NC_037639.1	4697090	intron	gene1729
peak284	peak284										peak1541	NC_037639.1	4717159	upstream	gene1731
peak5860	peak5860										peak1542	NC_037639.1	4721542	intron	gene1731
peak9127	peak9127										peak1543	NC_037639.1	4732842	promoter	gene1732
peak2788	peak2788										peak1544	NC_037639.1	4767173	intron	gene1733
peak7267	peak7267										peak1545	NC_037639.1	4797890	promoter	gene1733
peak3538	peak3538										peak1546	NC_037639.1	4819047	exon	gene1734
peak1486	peak1486										peak1547	NC_037639.1	4823432	exon	gene1736
peak7989	peak7989										peak1548	NC_037639.1	4829140	exon	gene1737
peak3998	peak3998										peak1549	NC_037639.1	4831736	exon	gene1738
peak4328	peak4328										peak1550	NC_037639.1	4834154	five_utr	gene1739
peak4208	peak4208										peak1551	NC_037639.1	4837745	exon	gene1740
peak1971	peak1971										peak1552	NC_037639.1	4882178	intron	gene1741
peak9086	peak9086										peak1553	NC_037639.1	4896103	intron	gene1741
peak7628	peak7628										peak1554	NC_037639.1	4897497	five_utr	gene1741
peak5170	peak5170										peak1555	NC_037639.1	4898216	promoter	gene1741
peak1304	peak1304										peak1556	NC_037639.1	4898567	upstream	gene1741
peak5652	peak5652										peak1557	NC_037639.1	4936798	intergenic	NA
peak4291	peak4291										peak1558	NC_037639.1	4938649	intergenic	NA
peak3903	peak3903										peak1559	NC_037639.1	4979164	five_utr	gene1745
peak9241	peak9241										peak1560	NC_037639.1	4979644	exon	gene1745
peak5909	peak5909										peak1561	NC_037639.1	5008551	intron	gene1745
peak9989	peak9989										peak1562	NC_037639.1	5235215	intron	gene1745
peak4676	peak4676										peak1563	NC_037639.1	5236220	intron	gene1745
peak6249	peak6249										peak1564	NC_037639.1	5252621	intron	gene1745
peak4706	peak4706										peak1565	NC_037639.1	5317959	five_utr	gene1747
peak9443	peak9443										peak1566	NC_037639.1	5325488	five_utr	gene1748
peak2388	peak2388										peak1567	NC_037639.1	5363401	intron	gene1749
peak3344	peak3344										peak1568	NC_037639.1	5438132	intron	gene1752
peak2347	peak2347										peak1569	NC_037639.1	5468557	intron	gene1752
peak5649	peak5649										peak1570	NC_037639.1	5481371	five_utr	gene1752
peak8940	peak8940										peak1571	NC_037639.1	5498774	upstream	gene1753
peak9920	peak9920										peak1572	NC_037639.1	5544066	five_utr	gene1755
peak4192	peak4192										peak1573	NC_037639.1	5556523	exon	gene1758
peak7220	peak7220										peak1574	NC_037639.1	5564051	five_utr	gene1759
peak3368	peak3368										peak1575	NC_037639.1	5565047	promoter	gene1759
peak4804	peak4804										peak1576	NC_037639.1	5569651	five_utr	gene1761
peak8394	peak8394										peak1577	NC_037639.1	5592904	intron	gene1761
peak8020	peak8020										peak1578	NC_037639.1	5595028	intron	gene1761
peak1640	peak1640										peak1579	NC_037639.1	5622139	intron	gene1761
peak4072	peak4072										peak1580	NC_037639.1	5639682	intron	gene1761
peak5790	peak5790										peak1581	NC_037639.1	5640058	intron	gene1761
peak8590	peak8590										peak1582	NC_037639.1	5659456	promoter	gene1763
peak11168	peak11168										peak1583	NC_037639.1	5660109	promoter	gene1764
peak2621	peak2621										peak1584	NC_037639.1	5660961	five_utr	gene1764
peak6768	peak6768										peak1585	NC_037639.1	5662786	intron	gene1764
peak1595	peak1595										peak1586	NC_037639.1	5663414	intron	gene1764
peak9043	peak9043										peak1587	NC_037639.1	5717677	intron	gene1764
peak4147	peak4147										peak1588	NC_037639.1	5727816	upstream	gene1766
peak9348	peak9348										peak1589	NC_037639.1	5758493	intron	gene1769
peak406	peak406										peak1590	NC_037639.1	5813126	intron	gene1769
peak4027	peak4027										peak1591	NC_037639.1	5848245	intron	gene1769
peak4788	peak4788										peak1592	NC_037639.1	5859490	intron	gene1769
peak1588	peak1588										peak1593	NC_037639.1	5957198	upstream	gene1771
peak627	peak627										peak1594	NC_037639.1	5964419	promoter	gene1771
peak9420	peak9420										peak1595	NC_037639.1	5970225	promoter	gene1772
peak6359	peak6359										peak1596	NC_037639.1	5983506	five_utr	gene1773
peak3274	peak3274										peak1597	NC_037639.1	6100072	intron	gene1773
peak486	peak486										peak1598	NC_037639.1	6205296	downstream	gene1777
peak6526	peak6526										peak1599	NC_037639.1	6225575	five_utr	gene1778
peak10158	peak10158										peak1600	NC_037639.1	6264405	promoter	gene1786
peak11611	peak11611										peak1601	NC_037639.1	6283304	promoter	gene1789
peak5952	peak5952										peak1602	NC_037639.1	6292936	five_utr	gene1792
peak10478	peak10478										peak1603	NC_037639.1	6317536	intron	gene1792
peak3193	peak3193										peak1604	NC_037639.1	6334201	upstream	gene1795
peak3214	peak3214										peak1605	NC_037639.1	6335698	five_utr	gene1795
peak2268	peak2268										peak1606	NC_037639.1	6366134	five_utr	gene1796
peak4789	peak4789										peak1607	NC_037639.1	6367772	five_utr	gene1797
peak8214	peak8214										peak1608	NC_037639.1	6374903	promoter	gene1798
peak4790	peak4790										peak1609	NC_037639.1	6407929	upstream	gene1800
peak7558	peak7558										peak1610	NC_037639.1	6417471	upstream	gene1801
peak9915	peak9915										peak1611	NC_037639.1	6418641	upstream	gene1801
peak4602	peak4602										peak1612	NC_037639.1	6419699	upstream	gene1801
peak8051	peak8051										peak1613	NC_037639.1	6483935	exon	gene1804
peak3852	peak3852										peak1614	NC_037639.1	6484715	exon	gene1804
peak10979	peak10979										peak1615	NC_037639.1	6513573	five_utr	gene1805
peak6109	peak6109										peak1616	NC_037639.1	6595431	intron	gene1806
peak1803	peak1803										peak1617	NC_037639.1	6607905	promoter	gene1809
peak7193	peak7193										peak1618	NC_037639.1	6609845	exon	gene1810
peak1512	peak1512										peak1619	NC_037639.1	6614536	promoter	gene1812
peak2324	peak2324										peak1620	NC_037639.1	6620510	exon	gene1814
peak5734	peak5734										peak1621	NC_037639.1	6621881	promoter	gene1814
peak421	peak421										peak1622	NC_037639.1	6650032	upstream	gene1819
peak1621	peak1621										peak1623	NC_037639.1	6651603	upstream	gene1819
peak2701	peak2701										peak1624	NC_037639.1	6733793	promoter	gene1821
peak2583	peak2583										peak1625	NC_037639.1	6756635	intron	gene1824
peak7290	peak7290										peak1626	NC_037639.1	6759705	five_utr	gene1825
peak4157	peak4157										peak1627	NC_037639.1	6770926	promoter	gene1828
peak5067	peak5067										peak1628	NC_037639.1	6818476	intron	gene1829
peak5891	peak5891										peak1629	NC_037639.1	6828770	intron	gene1829
peak5325	peak5325										peak1630	NC_037639.1	6830163	intron	gene1829
peak4835	peak4835										peak1631	NC_037639.1	6859357	promoter	gene1830
peak3844	peak3844										peak1632	NC_037639.1	6860185	five_utr	gene1830
peak2684	peak2684										peak1633	NC_037639.1	6869041	intron	gene1830
peak8265	peak8265										peak1634	NC_037639.1	6921302	exon	gene1832
peak8188	peak8188										peak1635	NC_037639.1	6922255	exon	gene1832
peak9481	peak9481										peak1636	NC_037639.1	6923601	five_utr	gene1833
peak6808	peak6808										peak1637	NC_037639.1	6959606	promoter	gene1841
peak4630	peak4630										peak1638	NC_037639.1	6977183	promoter	gene1844
peak4570	peak4570										peak1639	NC_037639.1	6986275	exon	gene1846
peak6815	peak6815										peak1640	NC_037639.1	7016534	upstream	gene1848
peak4073	peak4073										peak1641	NC_037639.1	7018105	upstream	gene1848
peak9962	peak9962										peak1642	NC_037639.1	7040658	intergenic	NA
peak4183	peak4183										peak1643	NC_037639.1	7046981	upstream	gene1849
peak5964	peak5964										peak1644	NC_037639.1	7055288	five_utr	gene1849
peak9402	peak9402										peak1645	NC_037639.1	7056513	five_utr	gene1849
peak4112	peak4112										peak1646	NC_037639.1	7057850	intron	gene1849
peak8245	peak8245										peak1647	NC_037639.1	7059478	exon	gene1849
peak5399	peak5399										peak1648	NC_037639.1	7076248	intron	gene1849
peak1755	peak1755										peak1649	NC_037639.1	7081554	intron	gene1849
peak6903	peak6903										peak1650	NC_037639.1	7082796	intron	gene1849
peak5210	peak5210										peak1651	NC_037639.1	7083585	intron	gene1849
peak7988	peak7988										peak1652	NC_037639.1	7102226	intron	gene1849
peak4629	peak4629										peak1653	NC_037639.1	7118427	intron	gene1849
peak3235	peak3235										peak1654	NC_037639.1	7194311	intron	gene1849
peak4580	peak4580										peak1655	NC_037639.1	7249129	intron	gene1849
peak9934	peak9934										peak1656	NC_037639.1	7394258	intron	gene1849
peak6138	peak6138										peak1657	NC_037639.1	7409658	intron	gene1849
peak6909	peak6909										peak1658	NC_037639.1	7560859	intron	gene1849
peak426	peak426										peak1659	NC_037639.1	7623203	intron	gene1849
peak3100	peak3100										peak1660	NC_037639.1	7695748	intron	gene1849
peak6814	peak6814										peak1661	NC_037639.1	7803892	intron	gene1853
peak3895	peak3895										peak1662	NC_037639.1	7804878	upstream	gene1854
peak4137	peak4137										peak1663	NC_037639.1	7836147	exon	gene1854
peak7469	peak7469										peak1664	NC_037639.1	7839707	three_utr	gene1855
peak4093	peak4093										peak1665	NC_037639.1	7841349	exon	gene1855
peak3834	peak3834										peak1666	NC_037639.1	7869087	intron	gene1855
peak5164	peak5164										peak1667	NC_037639.1	8111849	intron	gene1855
peak7433	peak7433										peak1668	NC_037639.1	8123978	intron	gene1855
peak9406	peak9406										peak1669	NC_037639.1	8124809	promoter	gene1855
peak2297	peak2297										peak1670	NC_037639.1	8126277	upstream	gene1857
peak3342	peak3342										peak1671	NC_037639.1	8133387	promoter	gene1857
peak1805	peak1805										peak1672	NC_037639.1	8134200	five_utr	gene1857
peak3870	peak3870										peak1673	NC_037639.1	8149777	five_utr	gene1862
peak9970	peak9970										peak1674	NC_037639.1	8163851	promoter	gene1867
peak5075	peak5075										peak1675	NC_037639.1	8221287	promoter	gene1868
peak5653	peak5653										peak1676	NC_037639.1	8525621	intergenic	NA
peak1223	peak1223										peak1677	NC_037639.1	8659226	intron	gene1870
peak6549	peak6549										peak1678	NC_037639.1	8800014	intergenic	NA
peak401	peak401										peak1679	NC_037639.1	9014065	downstream	gene1872
peak4628	peak4628										peak1680	NC_037639.1	9033208	promoter	gene1874
peak5779	peak5779										peak1681	NC_037639.1	9115384	promoter	gene1877
peak9186	peak9186										peak1682	NC_037639.1	9357611	downstream	gene1878
peak5491	peak5491										peak1683	NC_037639.1	9377869	intergenic	NA
peak6924	peak6924										peak1684	NC_037639.1	9385144	intergenic	NA
peak10137	peak10137										peak1685	NC_037639.1	9390294	downstream	gene1879
peak3340	peak3340										peak1686	NC_037639.1	9398192	downstream	gene1879
peak6164	peak6164										peak1687	NC_037639.1	9441885	five_utr	gene1879
peak7467	peak7467										peak1688	NC_037639.1	9447958	promoter	gene1881
peak4982	peak4982										peak1689	NC_037639.1	9502873	promoter	gene1886
peak8443	peak8443										peak1690	NC_037639.1	9506904	upstream	gene1885
peak2682	peak2682										peak1691	NC_037639.1	9507867	upstream	gene1885
peak4793	peak4793										peak1692	NC_037639.1	9510243	five_utr	gene1887
peak4418	peak4418										peak1693	NC_037639.1	9516450	intron	gene1887
peak9586	peak9586										peak1694	NC_037639.1	9518605	intron	gene1887
peak5018	peak5018										peak1695	NC_037639.1	9530271	intron	gene1888
peak6869	peak6869										peak1696	NC_037639.1	9531379	five_utr	gene1888
peak3857	peak3857										peak1697	NC_037639.1	9533578	promoter	gene1890
peak199	peak199										peak1698	NC_037639.1	9535557	five_utr	gene1891
peak5237	peak5237										peak1699	NC_037639.1	9555520	intron	gene1891
peak1485	peak1485										peak1700	NC_037639.1	9630293	five_utr	gene1897
peak1433	peak1433										peak1701	NC_037639.1	9653419	intron	gene1898
peak836	peak836										peak1702	NC_037639.1	9659462	intron	gene1898
peak9919	peak9919										peak1703	NC_037639.1	9683348	five_utr	gene1905
peak4618	peak4618										peak1704	NC_037639.1	9689568	promoter	gene1907
peak7472	peak7472										peak1705	NC_037639.1	9703789	promoter	gene1909
peak3939	peak3939										peak1706	NC_037639.1	9729035	intron	gene1909
peak2646	peak2646										peak1707	NC_037639.1	9776859	intron	gene1909
peak4777	peak4777										peak1708	NC_037639.1	9833299	intron	gene1909
peak9003	peak9003										peak1709	NC_037639.1	9923946	downstream	gene1910
peak1756	peak1756										peak1710	NC_037639.1	9937644	downstream	gene1910
peak5651	peak5651										peak1711	NC_037639.1	9939429	downstream	gene1912
peak7379	peak7379										peak1712	NC_037639.1	9939903	upstream	gene1914
peak3142	peak3142										peak1713	NC_037639.1	9959469	intron	gene1914
peak148	peak148										peak1714	NC_037639.1	9971141	promoter	gene1916
peak1616	peak1616										peak1715	NC_037639.1	9972377	upstream	gene1918
peak8234	peak8234										peak1716	NC_037639.1	9973121	upstream	gene1918
peak4142	peak4142										peak1717	NC_037639.1	9974675	exon	gene1917
peak7380	peak7380										peak1718	NC_037639.1	10072898	exon	gene1954
peak3846	peak3846										peak1719	NC_037639.1	10132174	exon	gene1977
peak3899	peak3899										peak1720	NC_037639.1	10189093	five_utr	gene1989
peak1522	peak1522										peak1721	NC_037639.1	10190376	promoter	gene1989
peak9399	peak9399										peak1722	NC_037639.1	10198455	five_utr	gene1992
peak5735	peak5735										peak1723	NC_037639.1	10204235	promoter	gene1993
peak2647	peak2647										peak1724	NC_037639.1	10208676	intron	gene1994
peak1765	peak1765										peak1725	NC_037639.1	10209325	intron	gene1994
peak7381	peak7381										peak1726	NC_037639.1	10230244	upstream	gene1998
peak4685	peak4685										peak1727	NC_037639.1	10232506	upstream	gene1998
peak3902	peak3902										peak1728	NC_037639.1	10235935	upstream	gene1998
peak4593	peak4593										peak1729	NC_037639.1	10239152	exon	gene1998
peak9953	peak9953										peak1730	NC_037639.1	10255632	five_utr	gene1999
peak2467	peak2467										peak1731	NC_037639.1	10256885	intron	gene1999
peak7470	peak7470										peak1732	NC_037639.1	10257546	intron	gene1999
peak643	peak643										peak1733	NC_037639.1	10259624	intron	gene1999
peak1575	peak1575										peak1734	NC_037639.1	10280114	intron	gene1999
peak4794	peak4794										peak1735	NC_037639.1	10301991	intron	gene2003
peak10931	peak10931										peak1736	NC_037639.1	10304308	upstream	gene2005
peak8201	peak8201										peak1737	NC_037639.1	10305830	upstream	gene2003
peak3816	peak3816										peak1738	NC_037639.1	10310078	five_utr	gene2005
peak3901	peak3901										peak1739	NC_037639.1	10373885	intron	gene2007
peak4578	peak4578										peak1740	NC_037639.1	10377961	promoter	gene2008
peak11495	peak11495										peak1741	NC_037639.1	10405430	upstream	gene2011
peak1093	peak1093										peak1742	NC_037639.1	10421615	exon	gene2015
peak883	peak883										peak1743	NC_037639.1	10439722	five_utr	gene2017
peak7292	peak7292										peak1744	NC_037639.1	10461235	intron	gene2017
peak4731	peak4731										peak1745	NC_037639.1	10497537	three_utr	gene2017
peak9967	peak9967										peak1746	NC_037639.1	10513675	exon	gene2020
peak430	peak430										peak1747	NC_037639.1	10520253	five_utr	gene2021
peak4686	peak4686										peak1748	NC_037639.1	10521050	promoter	gene2021
peak877	peak877										peak1749	NC_037639.1	10524705	exon	gene2022
peak9954	peak9954										peak1750	NC_037639.1	10533805	promoter	gene2023
peak8696	peak8696										peak1751	NC_037639.1	10534971	promoter	gene2024
peak4785	peak4785										peak1752	NC_037639.1	10567546	promoter	gene2031
peak6186	peak6186										peak1753	NC_037639.1	10569383	upstream	gene2033
peak11196	peak11196										peak1754	NC_037639.1	10574228	upstream	gene2030
peak2316	peak2316										peak1755	NC_037639.1	10739741	downstream	gene2034
peak4284	peak4284										peak1756	NC_037639.1	10749065	downstream	gene2034
peak9964	peak9964										peak1757	NC_037639.1	10779012	intron	gene2034
peak1597	peak1597										peak1758	NC_037639.1	10832998	intergenic	NA
peak2466	peak2466										peak1759	NC_037639.1	10862841	promoter	gene2035
peak522	peak522										peak1760	NC_037639.1	10915956	intron	gene2039
peak11173	peak11173										peak1761	NC_037639.1	10948517	promoter	gene2048
peak2661	peak2661										peak1762	NC_037639.1	10949414	promoter	gene2049
peak876	peak876										peak1763	NC_037639.1	10955366	intron	gene2041
peak1091	peak1091										peak1764	NC_037639.1	11016279	intron	gene2041
peak7468	peak7468										peak1765	NC_037639.1	11023375	intron	gene2041
peak7471	peak7471										peak1766	NC_037639.1	11058358	intron	gene2054
peak9363	peak9363										peak1767	NC_037639.1	11075259	promoter	gene2055
peak3845	peak3845										peak1768	NC_037639.1	11157638	intergenic	NA
peak1604	peak1604										peak1769	NC_037639.1	11169374	upstream	gene2058
peak11191	peak11191										peak1770	NC_037639.1	11184000	upstream	gene2059
peak457	peak457										peak1771	NC_037639.1	11187610	promoter	gene2059
peak9966	peak9966										peak1772	NC_037639.1	11193906	intron	gene2059
peak4687	peak4687										peak1773	NC_037639.1	11206561	intron	gene2059
peak1629	peak1629										peak1774	NC_037639.1	11207667	intron	gene2059
peak1630	peak1630										peak1775	NC_037639.1	11222525	three_utr	gene2059
peak2346	peak2346										peak1776	NC_037639.1	11225541	three_utr	gene2059
peak474	peak474										peak1777	NC_037639.1	11227618	promoter	gene2062
peak9963	peak9963										peak1778	NC_037639.1	11231365	five_utr	gene2063
peak1832	peak1832										peak1779	NC_037639.1	11232473	promoter	gene2063
peak1610	peak1610										peak1780	NC_037639.1	11237247	five_utr	gene2065
peak439	peak439										peak1781	NC_037639.1	11246374	intron	gene2065
peak1611	peak1611										peak1782	NC_037639.1	11248786	intron	gene2065
peak143	peak143										peak1783	NC_037639.1	11252989	intron	gene2065
peak4887	peak4887										peak1784	NC_037639.1	11257017	intron	gene2065
peak2338	peak2338										peak1785	NC_037639.1	11258687	intron	gene2065
peak9965	peak9965										peak1786	NC_037639.1	11270322	intron	gene2065
peak1827	peak1827										peak1787	NC_037639.1	11272962	intron	gene2065
peak1834	peak1834										peak1788	NC_037639.1	11274012	intron	gene2065
peak4690	peak4690										peak1789	NC_037639.1	11277006	intron	gene2065
peak1830	peak1830										peak1790	NC_037639.1	11286726	exon	gene2065
peak1829	peak1829										peak1791	NC_037639.1	11291694	three_utr	gene2067
peak1831	peak1831										peak1792	NC_037639.1	11344078	exon	gene2068
peak1828	peak1828										peak1793	NC_037639.1	11344922	promoter	gene2068
peak1833	peak1833										peak1794	NC_037639.1	11346386	intron	gene2069
peak2745											peak1795	NC_037639.1	11355575	promoter	gene2072
peak2513											peak1796	NC_037639.1	11365826	downstream	gene2074
peak10088											peak1797	NC_037639.1	11408854	intron	gene2075
peak7192											peak1798	NC_037639.1	11431810	intron	gene2075
peak7752											peak1799	NC_037639.1	11432811	intron	gene2075
peak6519											peak1800	NC_037639.1	11442738	promoter	gene2075
peak7030											peak1801	NC_037639.1	11488006	intron	gene2076
peak5079											peak1802	NC_037639.1	11497350	intron	gene2076
peak8634											peak1803	NC_037639.1	11504109	intron	gene2076
peak8860											peak1804	NC_037639.1	11506806	intron	gene2076
peak2925											peak1805	NC_037639.1	11509237	intron	gene2076
peak6596											peak1806	NC_037639.1	11510863	intron	gene2076
peak4516											peak1807	NC_037639.1	11512906	intron	gene2076
peak7458											peak1808	NC_037639.1	11527967	intron	gene2076
peak4606											peak1809	NC_037639.1	11531461	intron	gene2076
peak696											peak1810	NC_037639.1	11544893	intron	gene2076
peak2814											peak1811	NC_037639.1	11551941	five_utr	gene2076
peak9569											peak1812	NC_037639.1	11558980	intron	gene2078
peak6625											peak1813	NC_037639.1	11559836	intron	gene2078
peak7253											peak1814	NC_037639.1	11564291	intron	gene2078
peak8233											peak1815	NC_037639.1	11573743	promoter	gene2081
peak3572											peak1816	NC_037639.1	11609368	intron	gene2085
peak2599											peak1817	NC_037639.1	11631652	promoter	gene2086
peak6217											peak1818	NC_037639.1	11686611	intron	gene2086
peak5337											peak1819	NC_037639.1	11708891	intron	gene2086
peak951											peak1820	NC_037639.1	11709273	intron	gene2086
peak181											peak1821	NC_037639.1	11747687	downstream	gene2087
peak2694											peak1822	NC_037639.1	11748530	exon	gene2087
peak6361											peak1823	NC_037639.1	11766371	upstream	gene2092
peak9730											peak1824	NC_037639.1	11768546	exon	gene2089
peak650											peak1825	NC_037639.1	11772479	promoter	gene2092
peak5738											peak1826	NC_037639.1	11819843	promoter	gene2099
peak7466											peak1827	NC_037639.1	11823111	promoter	gene2098
peak8550											peak1828	NC_037639.1	11824375	upstream	gene2098
peak4584											peak1829	NC_037639.1	11824957	upstream	gene2100
peak6479											peak1830	NC_037639.1	11825964	promoter	gene2100
peak9031											peak1831	NC_037639.1	11826658	promoter	gene2100
peak10698											peak1832	NC_037639.1	11827657	intron	gene2100
peak7871											peak1833	NC_037639.1	11828757	intron	gene2100
peak3583											peak1834	NC_037639.1	11830066	intron	gene2100
peak8040											peak1835	NC_037639.1	11837751	upstream	gene2103
peak6204											peak1836	NC_037639.1	11838767	promoter	gene2101
peak4775											peak1837	NC_037639.1	11874931	intron	gene2102
peak9052											peak1838	NC_037639.1	11995994	intron	gene2105
peak735											peak1839	NC_037639.1	11998145	intron	gene2105
peak11104											peak1840	NC_037639.1	12042434	intron	gene2105
peak8753											peak1841	NC_037639.1	12074050	intron	gene2105
peak3612											peak1842	NC_037639.1	12081174	intron	gene2105
peak1548											peak1843	NC_037639.1	12130892	three_utr	gene2106
peak2868											peak1844	NC_037639.1	12134011	promoter	gene2107
peak1938											peak1845	NC_037639.1	12138878	promoter	gene2108
peak3465											peak1846	NC_037639.1	12150423	promoter	gene2111
peak3266											peak1847	NC_037639.1	12153201	intron	gene2112
peak2535											peak1848	NC_037639.1	12173412	intron	gene2112
peak5093											peak1849	NC_037639.1	12181350	intron	gene2112
peak8533											peak1850	NC_037639.1	12182082	intron	gene2112
peak3495											peak1851	NC_037639.1	12200018	intron	gene2112
peak9066											peak1852	NC_037639.1	12212847	intron	gene2112
peak1206											peak1853	NC_037639.1	12214571	intron	gene2112
peak10447											peak1854	NC_037639.1	12216368	intron	gene2112
peak2509											peak1855	NC_037639.1	12230700	intron	gene2112
peak644											peak1856	NC_037639.1	12243476	intron	gene2112
peak1022											peak1857	NC_037639.1	12303263	upstream	gene2113
peak1780											peak1858	NC_037639.1	12306251	five_utr	gene2113
peak159											peak1859	NC_037639.1	12316207	intron	gene2113
peak7846											peak1860	NC_037639.1	12319579	promoter	gene2114
peak9444											peak1861	NC_037639.1	12323719	intron	gene2113
peak8208											peak1862	NC_037639.1	12329701	intron	gene2113
peak2913											peak1863	NC_037639.1	12344898	intron	gene2113
peak4136											peak1864	NC_037639.1	12346799	intron	gene2113
peak6196											peak1865	NC_037639.1	12359091	intron	gene2113
peak5085											peak1866	NC_037639.1	12359416	intron	gene2113
peak4579											peak1867	NC_037639.1	12369852	intron	gene2113
peak5835											peak1868	NC_037639.1	12372814	intron	gene2113
peak9969											peak1869	NC_037639.1	12397317	intron	gene2113
peak10880											peak1870	NC_037639.1	12405811	intron	gene2113
peak9836											peak1871	NC_037639.1	12420885	three_utr	gene2116
peak4987											peak1872	NC_037639.1	12423767	intron	gene2116
peak2581											peak1873	NC_037639.1	12442516	five_utr	gene2116
peak11028											peak1874	NC_037639.1	12451057	promoter	gene2121
peak10843											peak1875	NC_037639.1	12530787	upstream	gene2125
peak9887											peak1876	NC_037639.1	12535802	intron	gene2127
peak4327											peak1877	NC_037639.1	12548430	five_utr	gene2130
peak10856											peak1878	NC_037639.1	12550746	five_utr	gene2131
peak9408											peak1879	NC_037639.1	12556163	intron	gene2131
peak7168											peak1880	NC_037639.1	12557074	intron	gene2131
peak4086											peak1881	NC_037639.1	12563875	five_utr	gene2132
peak4652											peak1882	NC_037639.1	12611045	promoter	gene2135
peak10503											peak1883	NC_037639.1	12620330	promoter	gene2137
peak10810											peak1884	NC_037639.1	12629285	five_utr	gene2138
peak4650											peak1885	NC_037639.1	12733116	five_utr	gene2142
peak10049											peak1886	NC_037639.1	12734751	upstream	gene2142
peak4688											peak1887	NC_037639.1	12739284	five_utr	gene2143
peak4066											peak1888	NC_037639.1	12770787	intron	gene2144
peak8160											peak1889	NC_037639.1	12773929	promoter	gene2144
peak1235											peak1890	NC_037639.1	12792838	upstream	gene2147
peak5616											peak1891	NC_037639.1	12798863	intron	gene2147
peak1586											peak1892	NC_037639.1	12850408	intron	gene2147
peak8241											peak1893	NC_037639.1	12927240	intron	gene2147
peak11099											peak1894	NC_037639.1	12963295	intron	gene2147
peak4647											peak1895	NC_037639.1	13094110	intron	gene2147
peak10811											peak1896	NC_037639.1	13096444	intron	gene2147
peak8574											peak1897	NC_037639.1	13098280	intron	gene2147
peak6509											peak1898	NC_037639.1	13098783	intron	gene2147
peak11195											peak1899	NC_037639.1	13099620	intron	gene2147
peak259											peak1900	NC_037639.1	13107235	intron	gene2147
peak7577											peak1901	NC_037639.1	13109214	intron	gene2147
peak11249											peak1902	NC_037639.1	13120369	downstream	gene2148
peak10917											peak1903	NC_037639.1	13121452	downstream	gene2147
peak8781											peak1904	NC_037639.1	13187379	intron	gene2148
peak5246											peak1905	NC_037639.1	13235621	five_utr	gene2148
peak4814											peak1906	NC_037639.1	13241409	promoter	gene2149
peak7113											peak1907	NC_037639.1	13266547	intron	gene2150
peak4946											peak1908	NC_037639.1	13291189	promoter	gene2151
peak5953											peak1909	NC_037639.1	13310328	promoter	gene2153
peak7969											peak1910	NC_037639.1	13311381	exon	gene2154
peak9539											peak1911	NC_037639.1	13315821	promoter	gene2155
peak1489											peak1912	NC_037639.1	13316552	five_utr	gene2155
peak10329											peak1913	NC_037639.1	13319742	intron	gene2155
peak991											peak1914	NC_037639.1	13351435	promoter	gene2160
peak10235											peak1915	NC_037639.1	13371106	promoter	gene2163
peak10109											peak1916	NC_037639.1	13382152	promoter	gene2167
peak4321											peak1917	NC_037639.1	13438405	promoter	gene2170
peak112											peak1918	NC_037639.1	13441207	intron	gene2170
peak3897											peak1919	NC_037639.1	13453349	intron	gene2170
peak5682											peak1920	NC_037639.1	13459721	intron	gene2170
peak7265											peak1921	NC_037639.1	13460531	intron	gene2170
peak7281											peak1922	NC_037639.1	13461106	intron	gene2170
peak8052											peak1923	NC_037639.1	13599713	five_utr	gene2173
peak3022											peak1924	NC_037639.1	13673633	intron	gene2174
peak9866											peak1925	NC_037639.1	13674767	intron	gene2174
peak5286											peak1926	NC_037639.1	13685582	exon	gene2175
peak2542											peak1927	NC_037639.1	13723199	promoter	gene2186
peak4812											peak1928	NC_037639.1	13733802	exon	gene2187
peak9182											peak1929	NC_037639.1	13735354	five_utr	gene2187
peak10443											peak1930	NC_037639.1	13739022	intron	gene2186
peak6917											peak1931	NC_037639.1	13742631	intron	gene2186
peak10436											peak1932	NC_037639.1	13747605	five_utr	gene2189
peak441											peak1933	NC_037639.1	13765964	intron	gene2189
peak10029											peak1934	NC_037639.1	13770547	intron	gene2189
peak9377											peak1935	NC_037639.1	13786619	intron	gene2189
peak9122											peak1936	NC_037639.1	13787957	intron	gene2189
peak6856											peak1937	NC_037639.1	13792434	intron	gene2189
peak3207											peak1938	NC_037639.1	13807172	intron	gene2189
peak8835											peak1939	NC_037639.1	13851268	intron	gene2189
peak6961											peak1940	NC_037639.1	13864112	upstream	gene2192
peak10422											peak1941	NC_037639.1	13887225	intron	gene2193
peak6211											peak1942	NC_037639.1	13981707	intron	gene2197
peak5576											peak1943	NC_037639.1	13988987	five_utr	gene2199
peak2114											peak1944	NC_037639.1	13992296	intron	gene2199
peak1090											peak1945	NC_037639.1	13999838	three_utr	gene2199
peak3327											peak1946	NC_037639.1	14059427	upstream	gene2207
peak4197											peak1947	NC_037639.1	14069030	promoter	gene2209
peak893											peak1948	NC_037639.1	14072535	five_utr	gene2210
peak1034											peak1949	NC_037639.1	14079157	intron	gene2210
peak9395											peak1950	NC_037639.1	14094521	promoter	gene2211
peak10417											peak1951	NC_037639.1	14099420	intron	gene2211
peak6192											peak1952	NC_037639.1	14101179	intron	gene2211
peak2994											peak1953	NC_037639.1	14110994	intron	gene2211
peak10272											peak1954	NC_037639.1	14113122	intron	gene2211
peak8193											peak1955	NC_037639.1	14114898	intron	gene2211
peak3148											peak1956	NC_037639.1	14126342	downstream	gene2211
peak11165											peak1957	NC_037639.1	14140300	upstream	gene2213
peak5567											peak1958	NC_037639.1	14171836	upstream	gene2215
peak6336											peak1959	NC_037639.1	14174386	promoter	gene2215
peak1757											peak1960	NC_037639.1	14174887	exon	gene2215
peak6777											peak1961	NC_037639.1	14182257	five_utr	gene2216
peak6355											peak1962	NC_037639.1	14210110	promoter	gene2220
peak5720											peak1963	NC_037639.1	14216696	intron	gene2221
peak8209											peak1964	NC_037639.1	14217851	intron	gene2221
peak10185											peak1965	NC_037639.1	14222330	intron	gene2221
peak8488											peak1966	NC_037639.1	14250786	upstream	gene2225
peak9633											peak1967	NC_037639.1	14256294	upstream	gene2225
peak4764											peak1968	NC_037639.1	14258573	five_utr	gene2225
peak8646											peak1969	NC_037639.1	14266241	intron	gene2225
peak10936											peak1970	NC_037639.1	14293065	exon	gene2226
peak3671											peak1971	NC_037639.1	14293631	promoter	gene2227
peak1690											peak1972	NC_037639.1	14297870	exon	gene2228
peak3080											peak1973	NC_037639.1	14298754	intron	gene2228
peak4800											peak1974	NC_037639.1	14299520	three_utr	gene2228
peak848											peak1975	NC_037639.1	14332961	intron	gene2229
peak8434											peak1976	NC_037639.1	14333778	intron	gene2229
peak2228											peak1977	NC_037639.1	14357688	intron	gene2229
peak228											peak1978	NC_037639.1	14358376	intron	gene2229
peak204											peak1979	NC_037639.1	14368188	exon	gene2229
peak9447											peak1980	NC_037639.1	14398117	promoter	gene2231
peak11041											peak1981	NC_037639.1	14398972	upstream	gene2232
peak2729											peak1982	NC_037639.1	14400199	upstream	gene2231
peak4709											peak1983	NC_037639.1	14400561	upstream	gene2231
peak3505											peak1984	NC_037639.1	14400833	upstream	gene2233
peak8800											peak1985	NC_037639.1	14401651	upstream	gene2233
peak6154											peak1986	NC_037639.1	14402580	promoter	gene2232
peak1058											peak1987	NC_037639.1	14404867	upstream	gene2231
peak5699											peak1988	NC_037639.1	14405767	upstream	gene2231
peak1105											peak1989	NC_037639.1	14407390	upstream	gene2234
peak3040											peak1990	NC_037639.1	14418272	promoter	gene2236
peak2424											peak1991	NC_037639.1	14526858	five_utr	gene2243
peak1164											peak1992	NC_037639.1	14534796	promoter	gene2244
peak7837											peak1993	NC_037639.1	14535545	promoter	gene2244
peak373											peak1994	NC_037639.1	14543680	five_utr	gene2246
peak5496											peak1995	NC_037639.1	14549388	intron	gene2246
peak1652											peak1996	NC_037639.1	14549770	intron	gene2246
peak6190											peak1997	NC_037639.1	14550458	intron	gene2246
peak6452											peak1998	NC_037639.1	14553131	intron	gene2246
peak3919											peak1999	NC_037639.1	14556576	intron	gene2246
[truncated: 9,615 more rows]
