# Supplementary material for: Individual differences in honey bee behavior enabled by plasticity in brain gene regulatory networks
Source: bioRxiv preprint, doi:10.1101/2020.09.09.289272, version 2 (2020-12-12)
Supplement: Supplemental File 5 [file 289272_file07.xlsx]

## Sheet: Sheet1
	PC1	PC2		PC1:	Top 5%	Bottom 5%	10% extreme		PC1, GO enrichment results						PC2:	Top 5%	Bottom 5%	10% extreme		PC2, GO enrichment results
gene5876	0.10648	-0.0481632			gene5876	gene6835	gene5876									gene1684	gene3148	gene1684
gene6629	0.104352	-0.0497214			gene6629	gene8008	gene6629		Top 5%							gene10449	gene3682	gene10449		Top 5%
gene10532	0.0875077	-0.0378153			gene10532	gene2845	gene10532		GO term	Description	P-value	FDR q-value	Enrichment (N, B, n, b)			gene2038	gene10706	gene2038
gene12371	0.0848873	-0.0404754			gene12371	gene11424	gene12371		GO:0055085	transmembrane transport	3.28e-08	0.000236	3.36 (6070,315,149,26)			gene11509	gene10622	gene11509		GO term	Description	P-value	FDR q-value	Enrichment (N, B, n, b)
gene6632	0.0814263	-0.0260441			gene6632	gene4019	gene6632		GO:0015672	monovalent inorganic cation transport	2.47e-07	0.000888	6.43 (6070,76,149,12)			gene2168	gene2903	gene2168		GO:0009583	detection of light stimulus	7.68e-07	0.00553	8.36 (6070,38,172,9)
gene5877	0.0791679	-0.031761			gene5877	gene9792	gene5877		GO:0034220	ion transmembrane transport	1.65e-06	0.00396	4.05 (6070,161,149,16)			gene11457	gene6331	gene11457		GO:0007602	phototransduction	2.68e-06	0.00964	8.56 (6070,33,172,8)
gene2100	0.0769469	-0.0455997			gene2100	gene6942	gene2100		GO:0098660	inorganic ion transmembrane transport	3.57e-06	0.00642	4.65 (6070,114,149,13)			gene2222	gene632	gene2222		GO:0009584	detection of visible light	3e-06	0.0072	13.23 (6070,16,172,6)
gene12176	0.0736557	-0.0346555			gene12176	gene6303	gene12176		GO:0006811	ion transport	4.54e-06	0.00653	3.13 (6070,260,149,20)			gene1040	gene6093	gene1040		GO:0009582	detection of abiotic stimulus	3.52e-06	0.00633	7.06 (6070,45,172,9)
gene12370	0.0724426	-0.0517638			gene12370	gene9385	gene12370		GO:0006123	mitochondrial electron transport, cytochrome c to oxygen	5.04e-06	0.00604	27.16 (6070,6,149,4)			gene8507	gene8590	gene8507		GO:0009581	detection of external stimulus	3.52e-06	0.00507	7.06 (6070,45,172,9)
gene12175	0.070772	-0.0361598			gene12175	gene1196	gene12175		GO:0019646	aerobic electron transport chain	5.04e-06	0.00518	27.16 (6070,6,149,4)			gene10460	gene6340	gene10460		GO:0007603	phototransduction, visible light	3.87e-06	0.00465	17.65 (6070,10,172,5)
gene8687	0.0693899	-0.0184677			gene8687	gene8441	gene8687		GO:0006812	cation transport	6.8e-06	0.00612	3.84 (6070,159,149,15)			gene4103	gene10795	gene4103		GO:0007600	sensory perception	4.49e-06	0.00462	4.54 (6070,101,172,13)
gene8238	0.069376	-0.053563			gene8238	gene4737	gene8238		GO:1902600	proton transmembrane transport	1.17e-05	0.00933	8.64 (6070,33,149,7)			gene11449	gene11770	gene11449		GO:0003008	system process	4.72e-06	0.00425	2.84 (6070,286,172,23)
gene11457	0.0687338	0.0752778			gene11457	gene2458	gene11457		GO:0015985	energy coupled proton transport, down electrochemical gradient	1.4e-05	0.01	14.55 (6070,14,149,5)			gene12234	gene2803	gene12234		GO:0032501	multicellular organismal process	5.55e-06	0.00444	1.83 (6070,984,172,51)
gene6735	0.0681189	-0.0135795			gene6735	gene10253	gene6735		GO:0015986	ATP synthesis coupled proton transport	1.4e-05	0.00913	14.55 (6070,14,149,5)			gene5667	gene10957	gene5667		GO:0051606	detection of stimulus	3.55e-05	0.0255	5.38 (6070,59,172,9)
gene6093	0.0667376	-0.0145524			gene6093	gene1749	gene6093		GO:0098655	cation transmembrane transport	1.64e-05	0.00985	4.36 (6070,112,149,12)			gene10649	gene7079	gene10649		GO:0007605	sensory perception of sound	5.91e-05	0.0387	5.76 (6070,49,172,8)
gene4852	0.0656943	-0.0230386			gene4852	gene6063	gene4852		GO:1901566	organonitrogen compound biosynthetic process	1.88e-05	0.0104	2.47 (6070,412,149,25)			gene1039	gene587	gene1039		GO:0050877	nervous system process	5.92e-05	0.0355	2.73 (6070,246,172,19)
gene856	0.0637628	-0.0296059			gene856	gene4818	gene856		GO:0009060	aerobic respiration	2.05e-05	0.0106	13.58 (6070,15,149,5)			gene1543	gene5788	gene1543		GO:0050878	regulation of body fluid levels	7.02e-05	0.0389	15.68 (6070,9,172,4)
gene8713	0.0636476	-0.0284694			gene8713	gene10978	gene8713		GO:0098662	inorganic cation transmembrane transport	3.21e-05	0.0154	4.44 (6070,101,149,11)			gene854	gene8044	gene854		GO:0008277	regulation of G protein-coupled receptor signaling pathway	0.000145	0.0746	9.29 (6070,19,172,5)
gene5304	0.06354	0.0370387			gene5304	gene5315	gene5304		GO:0016063	rhodopsin biosynthetic process	0.000148	0.0666	13.58 (6070,12,149,4)			gene4026	gene2821	gene4026		GO:0050954	sensory perception of mechanical stimulus	0.000157	0.0754	5.04 (6070,56,172,8)
gene7617	0.0633406	-0.00745971			gene7617	gene7566	gene7617		GO:0006518	peptide metabolic process	0.000188	0.0794	2.90 (6070,211,149,15)			gene5573	gene9943	gene5573		GO:0055085	transmembrane transport	0.000199	0.0897	2.35 (6070,315,172,21)
gene12293	0.0615231	-0.0247849			gene12293	gene3808	gene12293		GO:0046148	pigment biosynthetic process	0.000192	0.0769	5.70 (6070,50,149,7)			gene5864	gene3153	gene5864		GO:0071482	cellular response to light stimulus	0.000243	0.103	8.40 (6070,21,172,5)
gene7609	0.0609854	0.00463476			gene7609	gene5413	gene7609		GO:0045333	cellular respiration	0.000243	0.092	8.49 (6070,24,149,5)			gene1667	gene10854	gene1667		GO:0006821	chloride transport	0.000243	0.097	8.40 (6070,21,172,5)
gene6262	0.0608917	-0.0120084			gene6262	gene1148	gene6262		GO:0009583	detection of light stimulus	0.000285	0.103	6.43 (6070,38,149,6)			gene4621	gene11744	gene4621		GO:0022400	regulation of rhodopsin mediated signaling pathway	0.000258	0.0977	11.76 (6070,12,172,4)
gene6770	0.0608665	0.0136306			gene6770	gene5427	gene6770		GO:0046154	rhodopsin metabolic process	0.000288	0.0988	11.64 (6070,14,149,4)			gene4739	gene3300	gene4739		GO:0016059	deactivation of rhodopsin mediated signaling	0.000258	0.0928	11.76 (6070,12,172,4)
gene8663	0.0594007	0.00887419			gene8663	gene7974	gene8663		GO:0006754	ATP biosynthetic process	0.000298	0.0974	8.15 (6070,25,149,5)			gene11637	gene4933	gene11637		GO:0009416	response to light stimulus	0.000272	0.0932	3.79 (6070,93,172,10)
gene12361	0.0587385	-0.0108233			gene12361	gene8409	gene12361		GO:0009584	detection of visible light	0.000504	0.158	10.18 (6070,16,149,4)			gene8224	gene5186	gene8224		GO:0015698	inorganic anion transport	0.000278	0.091	6.42 (6070,33,172,6)
gene11337	0.0571682	-0.0115004			gene11337	gene1819	gene11337		GO:0009206	purine ribonucleoside triphosphate biosynthetic process	0.000615	0.184	7.02 (6070,29,149,5)			gene9693	gene7208	gene9693		GO:1902476	chloride transmembrane transport	0.000364	0.114	10.86 (6070,13,172,4)
gene12365	0.0566206	-0.0233371			gene12365	gene225	gene12365		GO:0009145	purine nucleoside triphosphate biosynthetic process	0.000615	0.177	7.02 (6070,29,149,5)			gene4940	gene1767	gene4940		GO:0045494	photoreceptor cell maintenance	0.000499	0.15	10.08 (6070,14,172,4)
gene7592	0.0555583	-0.0187856			gene7592	gene4419	gene7592		GO:0006726	eye pigment biosynthetic process	0.000723	0.2	6.79 (6070,30,149,5)			gene3932	gene1970	gene3932		GO:0050962	detection of light stimulus involved in sensory perception	0.00072	0.207	15.12 (6070,7,172,3)
gene816	0.0539305	0.0208772			gene816	gene4976	gene816		GO:0009201	ribonucleoside triphosphate biosynthetic process	0.000723	0.193	6.79 (6070,30,149,5)			gene6964	gene9662	gene6964		GO:0050908	detection of light stimulus involved in visual perception	0.00072	0.199	15.12 (6070,7,172,3)
gene12353	0.0512904	-0.0030012			gene12353	gene4763	gene12353		GO:0009582	detection of abiotic stimulus	0.000731	0.188	5.43 (6070,45,149,6)			gene9771	gene4377	gene9771		GO:0071454	cellular response to anoxia	0.000798	0.213	35.29 (6070,2,172,2)
gene9704	0.0504776	-0.0141007			gene9704	gene5403	gene9704		GO:0009581	detection of external stimulus	0.000731	0.181	5.43 (6070,45,149,6)			gene9804	gene5518	gene9804		GO:0008377	light-induced release of internally sequestered calcium ion	0.000798	0.205	35.29 (6070,2,172,2)
gene5095	0.0504372	-0.0249096			gene5095	gene6149	gene5095		GO:0006865	amino acid transport	0.000846	0.203	6.57 (6070,31,149,5)			gene4726	gene2345	gene4726		GO:0050891	multicellular organismal water homeostasis	0.000798	0.198	35.29 (6070,2,172,2)
gene5763	0.0486341	-0.000333948			gene5763	gene8302	gene5763		GO:0043324	pigment metabolic process involved in developmental pigmentation	0.000983	0.228	6.37 (6070,32,149,5)			gene3678	gene5888	gene3678		GO:0071214	cellular response to abiotic stimulus	0.000936	0.225	5.16 (6070,41,172,6)
gene12345	0.0485219	-0.0135184			gene12345	gene12244	gene12345		GO:0043474	pigment metabolic process involved in pigmentation	0.000983	0.221	6.37 (6070,32,149,5)			gene1041	gene10225	gene1041		GO:0104004	cellular response to environmental stimulus	0.000936	0.217	5.16 (6070,41,172,6)
gene12331	0.04834	-0.0258241			gene12331	gene10359	gene12331		GO:0042441	eye pigment metabolic process	0.000983	0.214	6.37 (6070,32,149,5)			gene11665	gene1021	gene11665
gene1040	0.0479946	0.0631276			gene1040	gene1755	gene1040		GO:0009142	nucleoside triphosphate biosynthetic process	0.000983	0.208	6.37 (6070,32,149,5)			gene5235	gene8380	gene5235
gene12337	0.047978	0.00351851			gene12337	gene875	gene12337									gene4855	gene11122	gene4855		Bottom 5%
gene1684	0.0476177	0.104679			gene1684	gene9950	gene1684									gene6042	gene4936	gene6042
gene7596	0.0475199	0.00715469			gene7596	gene3116	gene7596		Bottom 5%							gene12215	gene9950	gene12215		GO term	Description	P-value	FDR q-value	Enrichment (N, B, n, b)
gene7726	0.04747	-0.0158839			gene7726	gene6244	gene7726									gene11505	gene2562	gene11505		GO:0002181	cytoplasmic translation	1.21e-22	8.71e-19	11.82 (6070,83,167,27)
gene7108	0.0474255	-0.0273156			gene7108	gene1242	gene7108		GO term	Description	P-value	FDR q-value	Enrichment (N, B, n, b)			gene10659	gene3159	gene10659		GO:0006412	translation	1.79e-13	6.44e-10	5.51 (6070,178,167,27)
gene6559	0.0468649	-0.0389795			gene6559	gene4721	gene6559		GO:0042430	indole-containing compound metabolic process	0.000683	1	15.39 (6070,7,169,3)			gene2625	gene12193	gene2625		GO:0043043	peptide biosynthetic process	3.12e-13	7.49e-10	5.39 (6070,182,167,27)
gene11001	0.0464639	-0.0133424			gene11001	gene7685	gene11001									gene4913	gene954	gene4913		GO:0043604	amide biosynthetic process	4.77e-13	8.58e-10	5.09 (6070,200,167,28)
gene557	0.0454256	0.0355284			gene557	gene1375	gene557									gene3587	gene4243	gene3587		GO:0006518	peptide metabolic process	1.85e-12	2.66e-09	4.82 (6070,211,167,28)
gene12334	0.0452927	-0.0210285			gene12334	gene1393	gene12334		10% extreme							gene10360	gene9255	gene10360		GO:0043603	cellular amide metabolic process	7.94e-12	9.53e-09	4.24 (6070,257,167,30)
gene717	0.0449877	-0.00736374			gene717	gene6819	gene717									gene10962	gene3601	gene10962		GO:0034645	cellular macromolecule biosynthetic process	2.2e-07	0.000226	2.77 (6070,393,167,30)
gene4310	0.044657	-0.0201678			gene4310	gene126	gene4310		GO term	Description	P-value	FDR q-value	Enrichment (N, B, n, b)			gene7566	gene1739	gene7566		GO:0009059	macromolecule biosynthetic process	5.32e-07	0.000478	2.56 (6070,455,167,32)
gene12290	0.0443721	-0.0109943			gene12290	gene1527	gene12290		GO:0046148	pigment biosynthetic process	4.07e-05	0.293	4.20 (6070,50,318,11)			gene8934	gene12053	gene8934		GO:1901566	organonitrogen compound biosynthetic process	1.96e-06	0.00157	2.56 (6070,412,167,29)
gene933	0.0431002	-0.0407504			gene933	gene5041	gene933		GO:0006123	mitochondrial electron transport, cytochrome c to oxygen	0.000102	0.367	12.73 (6070,6,318,4)			gene1575	gene5841	gene1575		GO:0044271	cellular nitrogen compound biosynthetic process	4.3e-06	0.0031	2.28 (6070,525,167,33)
gene11259	0.0429641	-0.00626169			gene11259	gene4806	gene11259		GO:0019646	aerobic electron transport chain	0.000102	0.245	12.73 (6070,6,318,4)			gene4905	gene11164	gene4905		GO:1901576	organic substance biosynthetic process	4.6e-05	0.0301	1.83 (6070,833,167,42)
gene1707	0.0427701	-0.0104192			gene1707	gene9864	gene1707		GO:0016063	rhodopsin biosynthetic process	0.000223	0.402	7.95 (6070,12,318,5)			gene1104	gene3168	gene1104		GO:0009058	biosynthetic process	8.73e-05	0.0524	1.78 (6070,856,167,42)
gene9265	0.0427277	-0.0103271			gene9265	gene871	gene9265		GO:0055085	transmembrane transport	0.000447	0.644	1.88 (6070,315,318,31)			gene10317	gene3022	gene10317		GO:0044249	cellular biosynthetic process	8.91e-05	0.0494	1.82 (6070,800,167,40)
gene5181	0.0426424	-0.00100808			gene5181	gene6850	gene5181		GO:0015985	energy coupled proton transport, down electrochemical gradient	0.000517	0.621	6.82 (6070,14,318,5)			gene3589	gene6295	gene3589		GO:1901564	organonitrogen compound metabolic process	0.000165	0.0847	1.49 (6070,1586,167,65)
gene2222	0.0421137	0.0746959			gene2222	gene7745	gene2222		GO:0015986	ATP synthesis coupled proton transport	0.000517	0.532	6.82 (6070,14,318,5)			gene9694	gene12153	gene9694		GO:0019538	protein metabolic process	0.000369	0.177	1.56 (6070,1215,167,52)
gene12206	0.0415591	-0.0389295			gene12206	gene8422	gene12206		GO:0046154	rhodopsin metabolic process	0.000517	0.465	6.82 (6070,14,318,5)			gene2387	gene1333	gene2387		GO:0000461	endonucleolytic cleavage to generate mature 3'-end of SSU-rRNA from (SSU-rRNA, 5.8S rRNA, LSU-rRNA)	0.000753	0.339	36.35 (6070,2,167,2)
gene9694	0.0411639	0.0420356			gene9694	gene10498	gene9694		GO:0015672	monovalent inorganic cation transport	0.000521	0.417	3.01 (6070,76,318,12)			gene6574	gene9793	gene6574		GO:0044267	cellular protein metabolic process	0.000825	0.349	1.60 (6070,978,167,43)
gene8944	0.0410256	0.00308666			gene8944	gene7966	gene8944		GO:0006726	eye pigment biosynthetic process	0.000726	0.522	4.45 (6070,30,318,7)			gene3645	gene6512	gene3645
gene12326	0.0407762	-0.0197679			gene12326	gene10630	gene12326		GO:0050830	defense response to Gram-positive bacterium	0.000743	0.486	6.36 (6070,15,318,5)			gene4558	gene11230	gene4558
gene10092	0.040265	-0.01737			gene10092	gene3944	gene10092		GO:0009060	aerobic respiration	0.000743	0.446	6.36 (6070,15,318,5)			gene11443	gene2540	gene11443		10% extreme
gene8665	0.0401968	-0.0305002			gene8665	gene2174	gene8665									gene10251	gene4180	gene10251
gene8237	0.0399891	-0.0177202			gene8237	gene4150	gene8237									gene488	gene6634	gene488		GO term	Description	P-value	FDR q-value	Enrichment (N, B, n, b)
gene3087	0.0398728	0.0158779			gene3087	gene2035	gene3087									gene9277	gene2231	gene9277		GO:0002181	cytoplasmic translation	1.57e-14	1.13e-10	5.82 (6070,83,339,27)
gene7771	0.0397386	-0.00317154			gene7771	gene11856	gene7771									gene8266	gene1953	gene8266		GO:0006412	translation	1.53e-06	0.00552	2.72 (6070,178,339,27)
gene12325	0.0392088	-0.0208493			gene12325	gene10166	gene12325									gene5757	gene6821	gene5757		GO:0043604	amide biosynthetic process	1.61e-06	0.00386	2.60 (6070,200,339,29)
gene1037	0.0391798	0.0340532			gene1037	gene8175	gene1037									gene2476	gene873	gene2476		GO:0043043	peptide biosynthetic process	2.39e-06	0.00429	2.66 (6070,182,339,27)
gene5497	0.0387328	-0.0345754			gene5497	gene11398	gene5497									gene4706	gene9579	gene4706		GO:0043603	cellular amide metabolic process	4.8e-06	0.00691	2.30 (6070,257,339,33)
gene1914	0.0386677	-0.0061558			gene1914	gene2745	gene1914									gene10901	gene5642	gene10901		GO:0006518	peptide metabolic process	4.84e-06	0.00581	2.46 (6070,211,339,29)
gene3032	0.0386014	0.0229919			gene3032	gene9525	gene3032									gene5006	gene493	gene5006		GO:0009584	detection of visible light	1.18e-05	0.0121	7.83 (6070,16,339,7)
gene11443	0.0383401	0.039996			gene11443	gene11052	gene11443									gene6040	gene9376	gene6040		GO:0009583	detection of light stimulus	3e-05	0.027	4.71 (6070,38,339,10)
gene1041	0.0382175	0.0473656			gene1041	gene11104	gene1041									gene998	gene5731	gene998		GO:0051606	detection of stimulus	7.83e-05	0.0627	3.64 (6070,59,339,12)
gene11862	0.0381476	0.0106199			gene11862	gene2736	gene11862									gene3957	gene8259	gene3957		GO:0007603	phototransduction, visible light	0.000105	0.0758	8.95 (6070,10,339,5)
gene2038	0.0378765	0.0802594			gene2038	gene11122	gene2038									gene8430	gene7705	gene8430		GO:0009582	detection of abiotic stimulus	0.000143	0.0933	3.98 (6070,45,339,10)
gene8871	0.0378481	-0.0184664			gene8871	gene3721	gene8871									gene6897	gene2564	gene6897		GO:0009581	detection of external stimulus	0.000143	0.0855	3.98 (6070,45,339,10)
gene12017	0.0376049	-0.0206494			gene12017	gene8664	gene12017									gene617	gene9661	gene617		GO:0050962	detection of light stimulus involved in sensory perception	0.000292	0.162	10.23 (6070,7,339,4)
gene3533	0.037479	-0.018426			gene3533	gene6273	gene3533									gene11286	gene6458	gene11286		GO:0050908	detection of light stimulus involved in visual perception	0.000292	0.15	10.23 (6070,7,339,4)
gene9582	0.0373495	-0.0363712			gene9582	gene660	gene9582									gene5304	gene4639	gene5304		GO:0015698	inorganic anion transport	0.000353	0.169	4.34 (6070,33,339,8)
gene5518	0.0372945	-0.0148716			gene5518	gene3298	gene5518									gene5093	gene7726	gene5093		GO:0007602	phototransduction	0.000353	0.159	4.34 (6070,33,339,8)
gene12291	0.0372522	-0.0107733			gene12291	gene6211	gene12291									gene8124	gene7206	gene8124		GO:0008277	regulation of G protein-coupled receptor signaling pathway	0.000423	0.179	5.65 (6070,19,339,6)
gene7769	0.0369456	-0.00833875			gene7769	gene3373	gene7769									gene6570	gene1507	gene6570		GO:0007600	sensory perception	0.000432	0.173	2.66 (6070,101,339,15)
gene9018	0.0362251	0.0219303			gene9018	gene1228	gene9018									gene8410	gene1801	gene8410		GO:0055085	transmembrane transport	0.000637	0.241	1.82 (6070,315,339,32)
gene3108	0.0361792	-0.0169612			gene3108	gene3088	gene3108									gene8431	gene8916	gene8431		GO:0050906	detection of stimulus involved in sensory perception	0.00068	0.245	4.48 (6070,28,339,7)
gene7959	0.0359774	0.0313217			gene7959	gene7833	gene7959									gene10147	gene11195	gene10147		GO:0071482	cellular response to light stimulus	0.00077	0.264	5.12 (6070,21,339,6)
gene12356	0.0359551	-0.0056869			gene12356	gene2667	gene12356									gene6683	gene9476	gene6683		GO:0050878	regulation of body fluid levels	0.000962	0.315	7.96 (6070,9,339,4)
gene6416	0.0355739	-0.0161566			gene6416	gene10399	gene6416									gene1644	gene3447	gene1644
gene1001	0.0355643	0.0354043			gene1001	gene2190	gene1001									gene5005	gene3199	gene5005
gene413	0.0354286	-0.0183263			gene413	gene6288	gene413									gene4942	gene11716	gene4942
gene11505	0.0353523	0.0455441			gene11505	gene9574	gene11505									gene3004	gene7987	gene3004
gene715	0.0352471	-0.0179744			gene715	gene3268	gene715									gene10072	gene7428	gene10072
gene10901	0.0350144	0.0383288			gene10901	gene8720	gene10901									gene557	gene5875	gene557
gene8969	0.0346226	-0.0126021			gene8969	gene1325	gene8969									gene10267	gene4118	gene10267
gene10622	0.0345954	-0.014441			gene10622	gene7684	gene10622									gene10889	gene7578	gene10889
gene1938	0.0344439	0.0191737			gene1938	gene4070	gene1938									gene1001	gene7146	gene1001
gene9878	0.0344265	0.0303119			gene9878	gene2160	gene9878									gene7326	gene6416	gene7326
gene3492	0.0341214	-0.0253373			gene3492	gene7116	gene3492									gene5935	gene4429	gene5935
gene10056	0.0340595	-0.0245245			gene10056	gene3864	gene10056									gene7871	gene1064	gene7871
gene6624	0.0339738	-0.0192851			gene6624	gene6661	gene6624									gene11002	gene11316	gene11002
gene1341	0.0337056	0.00130014			gene1341	gene12306	gene1341									gene623	gene5962	gene623
gene3878	0.033469	-0.0265145			gene3878	gene12247	gene3878									gene10393	gene6680	gene10393
gene10446	0.033404	0.00983113			gene10446	gene6398	gene10446									gene8880	gene12363	gene8880
gene4018	0.0331269	-0.0337154			gene4018	gene12126	gene4018									gene7316	gene7406	gene7316
gene1039	0.0328343	0.0547505			gene1039	gene2132	gene1039									gene1037	gene1362	gene1037
gene1935	0.0325521	-0.011001			gene1935	gene8568	gene1935									gene1443	gene3115	gene1443
gene375	0.0325492	-0.0163303			gene375	gene470	gene375									gene11442	gene8218	gene11442
gene12373	0.0323625	-0.0486735			gene12373	gene6526	gene12373									gene11621	gene171	gene11621
gene11811	0.0320592	-0.0101622			gene11811	gene1917	gene11811									gene6441	gene2815	gene6441
gene9111	0.0319361	-0.0169933			gene9111	gene9600	gene9111									gene10663	gene9844	gene10663
gene6943	0.0317683	-0.0068404			gene6943	gene8601	gene6943									gene4738	gene375	gene4738
gene8672	0.0315434	0.00911884			gene8672	gene2652	gene8672									gene7286	gene1279	gene7286
gene6387	0.0314761	0.0219943			gene6387	gene7438	gene6387									gene1166	gene8500	gene1166
gene5845	0.0314242	-0.00838529			gene5845	gene226	gene5845									gene11351	gene9949	gene11351
gene8832	0.0311426	-0.00366045			gene8832	gene537	gene8832									gene7674	gene6819	gene7674
gene5404	0.0310239	-0.00750451			gene5404	gene3085	gene5404									gene4774	gene5603	gene4774
gene11498	0.0309945	0.0180865			gene11498	gene2211	gene11498									gene4543	gene8374	gene4543
gene4745	0.0309552	-0.0020862			gene4745	gene7920	gene4745									gene2210	gene572	gene2210
gene3060	0.0309427	-0.0197575			gene3060	gene1949	gene3060									gene2040	gene5032	gene2040
gene837	0.0309234	-0.0298439			gene837	gene3267	gene837									gene6561	gene6398	gene6561
gene9719	0.0308912	-0.0260756			gene9719	gene3082	gene9719									gene1156	gene2220	gene1156
gene2584	0.0307147	-0.00694251			gene2584	gene4333	gene2584									gene4027	gene8427	gene4027
gene10527	0.0305624	-0.0244238			gene10527	gene4776	gene10527									gene11720	gene502	gene11720
gene848	0.0302329	0.0308627			gene848	gene2780	gene848									gene5004	gene2466	gene5004
gene5523	0.0300438	0.000243035			gene5523	gene5972	gene5523									gene7959	gene1951	gene7959
gene12133	0.0299437	-0.0101153			gene12133	gene11334	gene12133									gene9129	gene11471	gene9129
gene716	0.0298707	-0.0276892			gene716	gene1311	gene716									gene11178	gene1227	gene11178
gene2526	0.0298593	-0.0276691			gene2526	gene10136	gene2526									gene10227	gene7136	gene10227
gene10334	0.0298451	0.00192959			gene10334	gene5675	gene10334									gene848	gene7262	gene848
gene11316	0.0297222	-0.0161879			gene11316	gene5859	gene11316									gene12117	gene1062	gene12117
gene12344	0.0295446	-0.0171969			gene12344	gene10991	gene12344									gene3861	gene875	gene3861
gene10868	0.029539	0.0263163			gene10868	gene10075	gene10868									gene11069	gene10202	gene11069
gene8384	0.0294828	0.00701653			gene8384	gene11113	gene8384									gene4980	gene2326	gene4980
gene9845	0.0293381	-0.0340588			gene9845	gene7640	gene9845									gene2058	gene6063	gene2058
gene12367	0.0293322	0.00630298			gene12367	gene8873	gene12367									gene6823	gene3164	gene6823
gene4436	0.0292938	-0.0123493			gene4436	gene5356	gene4436									gene7320	gene2407	gene7320
gene4712	0.0290209	-0.00612602			gene4712	gene3266	gene4712									gene1541	gene11994	gene1541
gene12366	0.0287808	-0.0133333			gene12366	gene9749	gene12366									gene7713	gene8443	gene7713
gene7871	0.028761	0.0352705			gene7871	gene10347	gene7871									gene7560	gene3288	gene7560
gene4953	0.0287087	-0.0435624			gene4953	gene826	gene4953									gene9878	gene3108	gene9878
gene5573	0.0286747	0.0535375			gene5573	gene10626	gene5573									gene4170	gene1128	gene4170
gene1235	0.0285602	-0.00980528			gene1235	gene8454	gene1235									gene5641	gene9111	gene5641
gene11906	0.0285327	-0.0133369			gene11906	gene5847	gene11906									gene607	gene9863	gene607
gene6453	0.0284205	-0.0205371			gene6453	gene8607	gene6453									gene1035	gene12199	gene1035
gene6042	0.0281542	0.046698			gene6042	gene4193	gene6042									gene12144	gene273	gene12144
gene11069	0.0281428	0.0307334			gene11069	gene1073	gene11069									gene1412	gene8213	gene1412
gene6593	0.0278572	0.00751011			gene6593	gene4752	gene6593									gene10877	gene1885	gene10877
gene11993	0.0276362	-0.021111			gene11993	gene7024	gene11993									gene8406	gene1640	gene8406
gene2253	0.0272462	-0.00183311			gene2253	gene11085	gene2253									gene3092	gene7386	gene3092
gene3667	0.0272436	-0.00814576			gene3667	gene7892	gene3667									gene6878	gene8123	gene6878
gene72	0.0272373	-0.00248026			gene72	gene7546	gene72									gene1131	gene9792	gene1131
gene5983	0.0271493	-0.0174203			gene5983	gene11722	gene5983									gene4145	gene12344	gene4145
gene7909	0.0271262	-0.00960617			gene7909	gene8007	gene7909									gene2108	gene10169	gene2108
gene2536	0.0270989	-0.00754355			gene2536	gene12117	gene2536									gene9856	gene4084	gene9856
gene11891	0.0269974	-0.00977585			gene11891	gene3118	gene11891									gene8640	gene1639	gene8640
gene7136	0.0268208	-0.0167619			gene7136	gene7919	gene7136									gene1205	gene8657	gene1205
gene205	0.0267932	-0.00970149			gene205	gene2578	gene205									gene2402	gene1952	gene2402
gene10045	0.0267757	-0.0181314			gene10045	gene4280	gene10045									gene843	gene10220	gene843
gene3109	0.0267526	-0.0104595			gene3109	gene3429	gene3109									gene8888	gene10092	gene8888
gene2387	0.0267294	0.0417536			gene2387	gene8004	gene2387									gene8693	gene5983	gene8693
gene6878	0.0266815	0.0293203			gene6878	gene2254	gene6878									gene479	gene3439	gene479
gene292	0.0265802	-0.0121449			gene292	gene5098	gene292									gene2055	gene7906	gene2055
gene4282	0.0265461	0.0222797			gene4282	gene8983	gene4282									gene4389	gene86	gene4389
gene6683	0.0264788	0.0361547			gene6683	gene5188	gene6683									gene12220	gene1894	gene12220
gene5642	0.0262923	-0.0156731			gene5642	gene6929	gene5642									gene10032	gene2772	gene10032
gene8657	0.0262348	-0.0172473			gene8657	gene4130	gene8657									gene1204	gene8788	gene1204
gene4938	0.0261309	0.0218225			gene4938	gene1870	gene4938									gene11460	gene12121	gene11460
gene4888	0.0261274	-0.00454106			gene4888	gene4743	gene4888									gene38	gene11968	gene38
gene8385	0.0261223	0.0135328			gene8385	gene6753	gene8385									gene7676	gene2194	gene7676
gene5004	0.0260188	0.0313678			gene5004	gene7374	gene5004									gene2002	gene6455	gene2002
gene4851	0.0259855	-0.000273398			gene4851	gene8220	gene4851									gene6272	gene491	gene6272
gene10112	0.0257066	0.0143441			gene10112	gene3096	gene10112									gene6828	gene4776	gene6828
gene1883	0.0256996	-0.00994574			gene1883	gene10752	gene1883									gene1282	gene8237	gene1282
gene572	0.0256784	-0.0165998			gene572	gene4188	gene572									gene8664	gene6638	gene8664
gene1005	0.0256632	0.0251741			gene1005	gene1950	gene1005									gene8948	gene3162	gene8948
gene5992	0.0256549	0.019546			gene5992	gene1069	gene5992									gene4542	gene2167	gene4542
gene167	0.0255995	-0.00810797			gene167	gene1739	gene167									gene10613	gene7124	gene10613
gene5105	0.0255796	-0.00896742			gene5105	gene8187	gene5105									gene5330	gene9951	gene5330
gene10937	0.0255638	0.0242425			gene10937	gene2251	gene10937									gene10011	gene11751	gene10011
gene10658	0.0255501	0.004548			gene10658	gene6776	gene10658									gene7441	gene7147	gene7441
gene9043	0.0254366	-0.0120294			gene9043	gene7394	gene9043									gene7817	gene2861	gene7817
gene1443	0.0253456	0.033988			gene1443	gene6008	gene1443									gene2465	gene6284	gene2465
gene1575	0.0249015	0.0436918			gene1575	gene2968	gene1575									gene3588	gene8007	gene3588
gene9185	0.0248934	9.47377e-05			gene9185	gene7094	gene9185									gene9933	gene1181	gene9933
gene11813	0.0247865	-0.00968814			gene11813	gene3795	gene11813									gene10868	gene715	gene10868
gene3728	0.0247641	0.0158253			gene3728	gene79	gene3728									gene7325	gene10045	gene7325
gene9562	0.0247583	-0.00901628			gene9562	gene4932	gene9562									gene505	gene6939	gene505
gene11238	0.0247241	-0.0243174			gene11238	gene10140	gene11238									gene356	gene8338	gene356
gene12324	0.0246993	-0.00714692			gene12324	gene9245	gene12324									gene7677	gene524	gene7677
gene7550	0.0245508	0.0250973			gene7550	gene5415	gene7550									gene9987	gene1821	gene9987
gene7916	0.0245224	-0.0123226			gene7916	gene2804	gene7916									gene7419	gene10687	gene7419
gene5235	0.0245183	0.0470487			gene5235	gene7079	gene5235									gene10209	gene11080	gene10209
gene8224	0.0243111	0.0502521			gene8224	gene2466	gene8224									gene3625	gene11530	gene3625
gene7932	0.0243061	0.00894931			gene7932	gene6214	gene7932									gene4625	gene11496	gene4625
gene8194	0.0242631	-0.010359			gene8194	gene9154	gene8194									gene1148	gene7625	gene1148
gene12029	0.0242574	0.0085587			gene12029	gene11343	gene12029									gene2578	gene12372	gene2578
gene1205	0.0242544	0.0287351			gene1205	gene10456	gene1205									gene4737	gene413	gene4737
gene2256	0.0242073	-0.000582674			gene2256	gene5968	gene2256									gene965	gene435	gene965
gene1940	0.0241849	0.00239061			gene1940	gene7571	gene1940									gene2396	gene1884	gene2396
gene10649	0.0241839	0.0553282			gene10649	gene10886	gene10649									gene4962	gene10122	gene4962
gene7586	0.0240942	0.0106775			gene7586	gene11653	gene7586									gene9774	gene730	gene9774
gene2404	0.0240918	-0.00965768			gene2404	gene2548	gene2404									gene6061	gene3533	gene6061
gene8948	0.0240416	0.0271466			gene8948	gene10515	gene8948									gene1005	gene1053	gene1005
gene5198	0.0239583	0.0169221			gene5198	gene7576	gene5198									gene8627	gene6288	gene8627
gene5006	0.023866	0.0381316			gene5006	gene8414	gene5006									gene7550	gene328	gene7550
gene11497	0.0237607	0.0132164			gene11497	gene2775	gene11497									gene156	gene3808	gene156
gene9921	0.0236878	0.00637944			gene9921	gene7554	gene9921									gene1656	gene8871	gene1656
gene2567	0.0236847	-0.0245997			gene2567	gene11615	gene2567									gene4205	gene8687	gene4205
gene9425	0.0235131	-0.0128906			gene9425	gene7574	gene9425									gene5010	gene3428	gene5010
gene1942	0.0234257	0.00915379			gene1942	gene9949	gene1942									gene10880	gene8746	gene10880
gene1997	0.0234068	-0.0083793			gene1997	gene8864	gene1997									gene9789	gene740	gene9789
gene11905	0.023396	-0.0125134			gene11905	gene7381	gene11905									gene10085	gene10503	gene10085
gene8431	0.0233583	0.0364117			gene8431	gene6196	gene8431									gene11021	gene6688	gene11021
gene10332	0.0233296	0.0182482			gene10332	gene8367	gene10332									gene5415	gene10121	gene5415
gene8686	0.023235	0.00547791			gene8686	gene3078	gene8686									gene10733	gene3581	gene10733
gene10655	0.0231812	0.00947282			gene10655	gene2770	gene10655									gene9077	gene1022	gene9077
gene4691	0.0231418	-0.0210659			gene4691	gene213	gene4691									gene4901	gene9561	gene4901
gene385	0.0231226	-0.00719913			gene385	gene8990	gene385									gene2623	gene5437	gene2623
gene11413	0.0230342	-0.000422663			gene11413	gene3865	gene11413									gene10937	gene2945	gene10937
gene10046	0.0229963	-0.0241085			gene10046	gene2034	gene10046									gene3374	gene867	gene3374
gene6634	0.0229938	-0.0154929			gene6634	gene11465	gene6634									gene11564	gene5945	gene11564
gene5878	0.0229935	-0.0105081			gene5878	gene2114	gene5878									gene5176	gene5505	gene5176
gene4981	0.0229343	0.00535705			gene4981	gene11461	gene4981									gene841	gene7592	gene841
gene1941	0.0229333	0.0105114			gene1941	gene9062	gene1941									gene5358	gene10165	gene5358
gene3890	0.0228997	0.00791463			gene3890	gene9912	gene3890									gene12018	gene11758	gene12018
gene10317	0.0228613	0.0429918			gene10317	gene6498	gene10317									gene3416	gene10624	gene3416
gene954	0.0228588	-0.0150049			gene954	gene3674	gene954									gene2870	gene7701	gene2870
gene4321	0.0227658	-0.00481082			gene4321	gene9960	gene4321									gene6471	gene8027	gene6471
gene6455	0.0226553	-0.017679			gene6455	gene11230	gene6455									gene5555	gene9463	gene5555
gene4639	0.0226401	-0.0158611			gene4639	gene12215	gene4639									gene6196	gene6624	gene6196
gene9977	0.0226393	-0.00546038			gene9977	gene2467	gene9977									gene4535	gene734	gene4535
gene10404	0.0226011	0.0210326			gene10404	gene7282	gene10404									gene11614	gene2600	gene11614
gene480	0.0225795	0.00554441			gene480	gene11649	gene480									gene8874	gene6927	gene8874
gene2585	0.0225213	-0.00946405			gene2585	gene8455	gene2585									gene7595	gene9184	gene7595
gene8961	0.0224781	-0.00540063			gene8961	gene5362	gene8961									gene315	gene5589	gene315
gene5005	0.0223774	0.0360693			gene5005	gene7884	gene5005									gene10626	gene10313	gene10626
gene2684	0.0223252	0.0067956			gene2684	gene7053	gene2684									gene3317	gene8678	gene3317
gene3912	0.0223189	-0.00370435			gene3912	gene7701	gene3912									gene11723	gene3013	gene11723
gene12145	0.0222797	0.0209421			gene12145	gene10267	gene12145									gene5680	gene9080	gene5680
gene8788	0.0222619	-0.0175825			gene8788	gene9086	gene8788									gene5022	gene3696	gene5022
gene2074	0.0222426	-0.00385384			gene2074	gene3771	gene2074									gene7664	gene10401	gene7664
gene6368	0.022231	-0.00963183			gene6368	gene6248	gene6368									gene550	gene7845	gene550
gene4896	0.0222289	0.00832865			gene4896	gene7390	gene4896									gene6954	gene11088	gene6954
gene8874	0.0222011	0.0236742			gene8874	gene8622	gene8874									gene5552	gene10091	gene5552
gene7734	0.0221669	-0.00834826			gene7734	gene1128	gene7734									gene3032	gene3132	gene3032
gene7441	0.0221575	0.0265539			gene7441	gene9793	gene7441									gene9775	gene3060	gene9775
gene10449	0.0221513	0.0973611			gene10449	gene11570	gene10449									gene8699	gene3812	gene8699
gene3090	0.0220836	0.0166053			gene3090	gene5374	gene3090									gene2393	gene12326	gene2393
gene1600	0.0220676	-0.0235101			gene1600	gene12284	gene1600									gene10737	gene7248	gene10737
gene719	0.0220065	-0.0197923			gene719	gene10660	gene719									gene1669	gene719	gene1669
gene2072	0.0219346	0.00115222			gene2072	gene12070	gene2072									gene1736	gene6482	gene1736
gene9554	0.0218729	0.0118981			gene9554	gene7056	gene9554									gene10130	gene7116	gene10130
gene1893	0.0218499	-0.0444328			gene1893	gene2330	gene1893									gene7373	gene5973	gene7373
gene9703	0.0217864	-0.011875			gene9703	gene3530	gene9703									gene4256	gene814	gene4256
gene4940	0.0217516	0.0499234			gene4940	gene887	gene4940									gene2789	gene389	gene2789
gene3837	0.0217265	0.00226875			gene3837	gene10191	gene3837									gene5360	gene75	gene5360
gene7578	0.0217016	-0.0161327			gene7578	gene5840	gene7578									gene10461	gene8379	gene10461
gene11339	0.0216983	0.0162486			gene11339	gene9246	gene11339									gene469	gene1983	gene469
gene2314	0.0216837	0.00113341			gene2314	gene2532	gene2314									gene3202	gene4310	gene3202
gene2649	0.021549	-0.0253034			gene2649	gene6518	gene2649									gene535	gene8041	gene535
gene5941	0.021444	0.0122595			gene5941	gene2327	gene5941									gene11630	gene2257	gene11630
gene355	0.0214028	0.00788135			gene355	gene7328	gene355									gene11454	gene4884	gene11454
gene4429	0.0213916	-0.0161699			gene4429	gene3195	gene4429									gene4282	gene8935	gene4282
gene10758	0.0213753	-0.00249201			gene10758	gene5325	gene10758									gene10350	gene6495	gene10350
gene3588	0.0213623	0.0263895			gene3588	gene4751	gene3588									gene10341	gene11802	gene10341
gene11606	0.0213053	-0.0128087			gene11606	gene11770	gene11606									gene6890	gene76	gene6890
gene4104	0.0212818	0.0191545			gene4104	gene119	gene4104									gene793	gene3265	gene793
gene6576	0.0212326	0.00525429			gene6576	gene3654	gene6576									gene3204	gene393	gene3204
gene10110	0.0212222	0.00726228			gene10110	gene11914	gene10110									gene12057	gene4510	gene12057
gene1939	0.021205	0.00799884			gene1939	gene1021	gene1939									gene12019	gene3867	gene12019
gene1111	0.0211857	-0.00837738			gene1111	gene1725	gene1111									gene5605	gene10435	gene5605
gene7206	0.0211761	-0.0158992			gene7206	gene10167	gene7206									gene5143	gene6498	gene5143
gene641	0.0211379	0.0115276			gene641	gene10963	gene641									gene6387	gene7042	gene6387
gene3270	0.0211109	0.00906645			gene3270	gene8253	gene3270									gene1900	gene6436	gene1900
gene10029	0.0210656	0.000642796			gene10029	gene1492	gene10029									gene9018	gene6453	gene9018
gene4880	0.0210365	0.0039693			gene4880	gene12222	gene4880									gene6280	gene1980	gene6280
gene10460	0.0210006	0.0603885			gene10460	gene10410	gene10460									gene4938	gene4748	gene4938
gene998	0.0209912	0.0380456			gene998	gene10992	gene998									gene4462	gene2539	gene4462
gene10926	0.0209459	-0.0100937			gene10926	gene5487	gene10926									gene7663	gene12017	gene7663
gene965	0.0209308	0.0253094			gene965	gene3784	gene965									gene10756	gene11966	gene10756
gene11869	0.0209129	-0.0692056			gene11869	gene11026	gene11869									gene7165	gene4012	gene7165
gene632	0.0208794	-0.0145042			gene632	gene9638	gene632									gene5427	gene11809	gene5427
gene4251	0.0208721	-0.0012009			gene4251	gene7501	gene4251									gene4246	gene11142	gene4246
gene10600	0.0208676	0.000434732			gene10600	gene7890	gene10600									gene10308	gene11387	gene10308
gene12068	0.0208431	-0.00790795			gene12068	gene6073	gene12068									gene4461	gene12325	gene4461
gene7972	0.0207862	5.36275e-05			gene7972	gene5011	gene7972									gene10752	gene7313	gene10752
gene10055	0.0207719	-0.00278537			gene10055	gene4117	gene10055									gene5362	gene157	gene5362
gene10668	0.0207664	0.0159165			gene10668	gene3299	gene10668									gene2626	gene1975	gene2626
gene11137	0.0207555	-0.00893545			gene11137	gene8043	gene11137									gene401	gene9600	gene401
gene7434	0.0207008	-0.00520557			gene7434	gene7976	gene7434									gene7673	gene12334	gene7673
gene2772	0.0206899	-0.017566			gene2772	gene7023	gene2772									gene10459	gene11398	gene10459
gene307	0.0206808	-0.00973457			gene307	gene10400	gene307									gene9281	gene4691	gene9281
gene3265	0.0206801	-0.0203038			gene3265	gene4648	gene3265									gene10404	gene11993	gene10404
gene2476	0.020662	0.0386193			gene2476	gene12289	gene2476									gene2720	gene7045	gene2720
gene11414	0.0206141	-0.0134209			gene11414	gene5957	gene11414									gene12145	gene5693	gene12145
gene5602	0.0206095	0.0130049			gene5602	gene7724	gene5602									gene816	gene11866	gene816
gene10511	0.0205777	-0.00094464			gene10511	gene3428	gene10511									gene9212	gene9117	gene9212
gene11482	0.0205315	-0.00366083			gene11482	gene7105	gene11482									gene6779	gene7381	gene6779
gene9019	0.0205202	-0.00255518			gene9019	gene11901	gene9019									gene6324	gene3814	gene6324
gene2966	0.0205136	-0.0139061			gene2966	gene3161	gene2966									gene640	gene6851	gene640
gene12332	0.0204472	-0.027899			gene12332	gene11407	gene12332									gene3736	gene2665	gene3736
gene11357	0.0204472	-0.0039261			gene11357	gene6944	gene11357									gene2770	gene1705	gene2770
gene10011	0.0203819	0.0266198			gene10011	gene2068	gene10011									gene2877	gene2667	gene2877
gene6934	0.0203798	-0.00594455			gene6934	gene3814	gene6934									gene7816	gene2037	gene7816
gene4684	0.0203722	0.0186519			gene4684	gene9547	gene4684									gene8628	gene12284	gene8628
gene2665	0.0203625	-0.0214917			gene2665	gene9408	gene2665									gene9516	gene7344	gene9516
gene8464	0.0203594	-0.00194718			gene8464	gene10218	gene8464									gene1142	gene4225	gene1142
gene4952	0.020245	0.00876072			gene4952	gene6324	gene4952									gene1103	gene11916	gene1103
gene8343	0.0202367	-0.00756161			gene8343	gene4243	gene8343									gene8395	gene9836	gene8395
gene1362	0.0202301	-0.0162389			gene1362	gene2600	gene1362									gene1347	gene6602	gene1347
gene341	0.0202129	0.0132287			gene341	gene8998	gene341									gene8893	gene2101	gene8893
gene2821	0.0201693	-0.0147026			gene2821	gene9221	gene2821									gene64	gene3700	gene64
gene1462	0.020147	0.00421466			gene1462	gene9340	gene1462									gene1345	gene563	gene1345
gene814	0.0201261	-0.0199669			gene814	gene1798	gene814									gene9601	gene9749	gene9601
gene7998	0.0200989	-0.00720563			gene7998	gene3737	gene7998									gene1800	gene10505	gene1800
gene1505	0.020092	-0.0068374			gene1505	gene475	gene1505									gene4091	gene8564	gene4091
gene7595	0.0200439	0.0236343			gene7595	gene4450	gene7595									gene3316	gene4985	gene3316
gene3891	0.0200157	0.000525709			gene3891	gene8427	gene3891									gene10429	gene8260	gene10429
gene5178	0.0199276	-0.00586238			gene5178	gene2674	gene5178									gene5011	gene208	gene5011
gene7308	0.0199073	-0.00457417			gene7308	gene4617	gene7308									gene5478	gene3636	gene5478
gene1204	0.0198882	0.0277752			gene1204	gene434	gene1204									gene12181	gene7690	gene12181
gene10962	0.0198435	0.0445413			gene10962	gene10429	gene10962									gene556	gene1916	gene556
gene10336	0.0198216	0.00402214			gene10336	gene4168	gene10336									gene5992	gene9086	gene5992
gene7044	0.0197651	0.0178818			gene7044	gene946	gene7044									gene8933	gene4852	gene8933
gene11500	0.0197619	-0.00487781			gene11500	gene9153	gene11500									gene5102	gene11510	gene5102
gene7672	0.0197376	-0.000457365			gene7672	gene989	gene7672									gene12228	gene3572	gene12228
gene8386	0.019696	0.0103852			gene8386	gene2	gene8386									gene5352	gene12365	gene5352
gene12197	0.0196622	-0.00375599			gene12197	gene5801	gene12197									gene4735	gene5184	gene4735
gene2595	0.0196429	-0.00265484			gene2595	gene10387	gene2595									gene5981	gene7918	gene5981
gene7897	0.0196385	-0.00159782			gene7897	gene10165	gene7897									gene842	gene9718	gene842
gene5979	0.0196341	0.0111801			gene5979	gene9870	gene5979									gene9139	gene1600	gene9139
gene11234	0.0195906	-0.00556065			gene11234	gene10169	gene11234									gene5023	gene5957	gene5023
gene12292	0.0195433	-0.000480313			gene12292	gene8270	gene12292									gene3423	gene1979	gene3423
gene11306	0.0194832	-0.00981972			gene11306	gene1376	gene11306									gene9055	gene2012	gene9055
gene4256	0.0194133	0.0227134			gene4256	gene9088	gene4256									gene6729	gene12201	gene6729
gene4103	0.0193864	0.0594926			gene4103	gene7310	gene4103									gene11653	gene8187	gene11653
gene1456	0.0193383	-0.00766635			gene1456	gene1186	gene1456									gene188	gene10039	gene188
gene1412	0.0193007	0.0299528			gene1412	gene8421	gene1412									gene3373	gene2068	gene3373
gene8018	0.0192503	-0.0142208			gene8018	gene5701	gene8018									gene1938	gene10046	gene1938
gene3061	0.0192373	-0.0263972			gene3061	gene1910	gene3061									gene4104	gene919	gene4104
gene3092	0.0192207	0.0295797			gene3092	gene9091	gene3092									gene10751	gene2633	gene10751
gene1507	0.0191289	-0.0159115			gene1507	gene6116	gene1507									gene10664	gene10534	gene10664
gene10533	0.0191153	-0.0339433			gene10533	gene3813	gene10533									gene7052	gene1978	gene7052
gene5600	0.0190889	0.00576789			gene5600	gene10747	gene5600									gene1375	gene11238	gene1375
gene9693	0.0190762	0.0500676			gene9693	gene4649	gene9693									gene2255	gene10527	gene2255
gene1232	0.0190409	-0.0110466			gene1232	gene12043	gene1232									gene6696	gene10056	gene6696
gene8729	0.0189783	-0.0014101			gene8729	gene8260	gene8729									gene4793	gene386	gene4793
gene7316	0.0189777	0.0340892			gene7316	gene2810	gene7316									gene11768	gene5895	gene11768
gene2012	0.0189247	-0.0236252			gene2012	gene8081	gene2012									gene3555	gene3432	gene3555
gene5820	0.0188955	-0.00486465			gene5820	gene7313	gene5820									gene11412	gene2567	gene11412
gene10341	0.0188785	0.0222412			gene10341	gene7516	gene10341									gene4684	gene10421	gene4684
gene5901	0.0188745	-0.0041381			gene5901	gene1067	gene5901									gene11979	gene8043	gene11979
gene9588	0.0188276	0.000246679			gene9588	gene5412	gene9588									gene10359	gene12293	gene10359
gene10800	0.0187318	-0.0251354			gene10800	gene5829	gene10800									gene5345	gene5095	gene5345
gene867	0.0186466	-0.0187354			gene867	gene9348	gene867									gene5818	gene1982	gene5818
gene754	0.0186367	0.00570465			gene754	gene2230	gene754									gene1206	gene4247	gene1206
gene11348	0.0186084	-0.0125863			gene11348	gene8794	gene11348									gene7584	gene10800	gene7584
gene3059	0.0186042	0.00213666			gene3059	gene10750	gene3059									gene9802	gene6275	gene9802
gene5132	0.0185589	0.00257404			gene5132	gene1022	gene5132									gene8947	gene2649	gene8947
gene471	0.0185193	0.014947			gene471	gene8576	gene471									gene5249	gene5396	gene5249
gene699	0.0185091	0.0036139			gene699	gene6445	gene699									gene988	gene5163	gene988
gene5226	0.0185054	0.0135456			gene5226	gene1248	gene5226									gene7536	gene3492	gene7536
gene3589	0.0184948	0.0427451			gene3589	gene10788	gene3589									gene4474	gene9816	gene4474
gene701	0.0184927	0.00948312			gene701	gene5830	gene701									gene226	gene784	gene226
gene8213	0.0184612	-0.0170452			gene8213	gene8041	gene8213									gene1481	gene8669	gene1481
gene5581	0.018449	7.15975e-05			gene5581	gene5023	gene5581									gene10332	gene1804	gene10332
gene4855	0.0184423	0.0467452			gene4855	gene9288	gene4855									gene10026	gene5938	gene10026
gene10481	0.0184267	-0.00960631			gene10481	gene8380	gene10481									gene10450	gene1974	gene10450
gene4706	0.0183983	0.0385728			gene4706	gene8331	gene4706									gene495	gene8668	gene495
gene7326	0.0183595	0.0353769			gene7326	gene9407	gene7326									gene11633	gene12331	gene11633
gene4942	0.0183535	0.0358427			gene4942	gene192	gene4942									gene9759	gene3745	gene9759
gene5443	0.0183461	-0.00434838			gene5443	gene2601	gene5443									gene11340	gene5687	gene11340
gene1279	0.0183405	-0.0163437			gene1279	gene291	gene1279									gene1367	gene6632	gene1367
gene390	0.0183288	0.0126263			gene390	gene208	gene390									gene11498	gene9719	gene11498
gene9215	0.0182789	0.00263913			gene9215	gene8768	gene9215									gene7430	gene3061	gene7430
gene11735	0.0182268	-0.00353539			gene11735	gene6045	gene11735									gene7855	gene1981	gene7855
gene3146	0.0182004	-0.011225			gene3146	gene3932	gene3146									gene5224	gene3878	gene5224
gene7585	0.0181465	0.011679			gene7585	gene10074	gene7585									gene9114	gene5494	gene9114
gene8255	0.0181132	-0.0034417			gene8255	gene7729	gene8255									gene207	gene10504	gene207
gene5022	0.0180814	0.0232481			gene5022	gene11454	gene5022									gene3718	gene3273	gene3718
gene9080	0.0179902	-0.0194865			gene9080	gene10894	gene9080									gene1740	gene9864	gene1740
gene9427	0.0179255	-0.00613336			gene9427	gene2653	gene9427									gene5479	gene2664	gene5479
gene2402	0.0177956	0.0286554			gene2402	gene7749	gene2402									gene8576	gene6518	gene8576
gene10500	0.0177682	0.00463773			gene10500	gene5869	gene10500									gene7616	gene7108	gene7616
gene10320	0.0177646	-0.0126711			gene10320	gene9716	gene10320									gene5816	gene1749	gene5816
gene5603	0.017745	-0.0165395			gene5603	gene7335	gene5603									gene7044	gene5771	gene7044
gene5330	0.0176293	0.0268064			gene5330	gene2803	gene5330									gene9138	gene5664	gene9138
gene1233	0.017594	-0.0143942			gene1233	gene2188	gene1233									gene3730	gene6740	gene3730
gene11665	0.0175901	0.04721			gene11665	gene6851	gene11665									gene7390	gene2526	gene7390
gene10435	0.0175829	-0.0204185			gene10435	gene5466	gene10435									gene5120	gene716	gene5120
gene3611	0.0175327	-0.00676804			gene3611	gene1815	gene3611									gene4509	gene9509	gene4509
gene7913	0.0174948	0.00492453			gene7913	gene6378	gene7913									gene11973	gene10093	gene11973
gene8406	0.0174829	0.0297736			gene8406	gene10581	gene8406									gene4254	gene7886	gene4254
gene4826	0.0174796	-0.00810925			gene4826	gene11510	gene4826									gene10316	gene12332	gene10316
gene9415	0.0174621	-0.0115109			gene9415	gene4676	gene9415									gene1479	gene1592	gene1479
gene4521	0.01744	-0.00852908			gene4521	gene1066	gene4521									gene10014	gene2810	gene10014
gene4503	0.0174346	0.00190824			gene4503	gene8309	gene4503									gene2506	gene10230	gene2506
gene2664	0.0173933	-0.0270933			gene2664	gene1804	gene2664									gene257	gene3322	gene257
gene10127	0.0173766	-0.00854591			gene10127	gene5038	gene10127									gene8429	gene4070	gene8429
gene10534	0.017346	-0.0242301			gene10534	gene3783	gene10534									gene3088	gene8713	gene3088
gene8189	0.0173349	-0.00486062			gene8189	gene615	gene8189									gene3691	gene7404	gene3691
gene8266	0.0173333	0.0393134			gene8266	gene6172	gene8266									gene11724	gene6303	gene11724
gene5388	0.0172565	-0.00863976			gene5388	gene9117	gene5388									gene8383	gene2527	gene8383
gene1077	0.0172402	-0.00397876			gene1077	gene6041	gene1077									gene1474	gene5499	gene1474
gene3158	0.0172262	-0.0298517			gene3158	gene7333	gene3158									gene5258	gene3771	gene5258
gene8971	0.0171849	-0.00114203			gene8971	gene10302	gene8971									gene6294	gene6710	gene6294
gene4730	0.0171786	-0.0058885			gene4730	gene11718	gene4730									gene10701	gene1976	gene10701
gene10769	0.0171772	-0.0020485			gene10769	gene3149	gene10769									gene5716	gene1723	gene5716
gene11294	0.0171284	0.00479228			gene11294	gene7523	gene11294									gene10925	gene856	gene10925
gene12018	0.0170905	0.0240123			gene12018	gene1675	gene12018									gene9960	gene5566	gene9960
gene5606	0.0170673	0.0116093			gene5606	gene11822	gene5606									gene8697	gene10987	gene8697
gene5848	0.0170627	0.0122723			gene5848	gene8668	gene5848									gene330	gene1066	gene330
gene11720	0.0170421	0.0316587			gene11720	gene9933	gene11720									gene3795	gene837	gene3795
gene1033	0.017034	0.0166553			gene1033	gene9720	gene1033									gene9898	gene3158	gene9898
gene219	0.0170269	0.0120891			gene219	gene7334	gene219									gene4257	gene2601	gene4257
gene1295	0.0169974	-0.00461183			gene1295	gene11350	gene1295									gene8723	gene8665	gene8723
gene11925	0.0169792	0.00742674			gene11925	gene64	gene11925									gene5198	gene10399	gene5198
gene11217	0.0169715	-0.00769706			gene11217	gene6954	gene11217									gene1070	gene8581	gene1070
gene8430	0.0169649	0.0377748			gene8430	gene3467	gene8430									gene7393	gene5469	gene7393
gene7147	0.0169233	-0.0178534			gene7147	gene5163	gene7147									gene4344	gene1067	gene4344
gene380	0.0169141	-0.00774984			gene380	gene5709	gene380									gene8409	gene3172	gene8409
gene4917	0.016884	0.0122147			gene4917	gene4091	gene4917									gene2352	gene7917	gene2352
gene596	0.0168819	0.0129808			gene596	gene3383	gene596									gene4189	gene9153	gene4189
gene10504	0.0168775	-0.0267496			gene10504	gene76	gene10504									gene9475	gene5877	gene9475
gene6605	0.0168291	0.00471153			gene6605	gene4621	gene6605									gene1033	gene11350	gene1033
gene90	0.0167997	-0.00491847			gene90	gene7713	gene90									gene5425	gene251	gene5425
gene5562	0.0167914	-0.00561045			gene5562	gene10294	gene5562									gene10960	gene1662	gene10960
gene9129	0.0167799	0.0313117			gene9129	gene3605	gene9129									gene3090	gene12023	gene3090
gene6505	0.0167031	-0.00612055			gene6505	gene6074	gene6505									gene9983	gene12369	gene9983
gene4497	0.0166847	0.00643471			gene4497	gene4764	gene4497									gene6279	gene9730	gene6279
gene9987	0.0166806	0.025952			gene9987	gene4845	gene9987									gene8448	gene2406	gene8448
gene3892	0.0166699	0.00953311			gene3892	gene9635	gene3892									gene4343	gene4018	gene4343
gene583	0.0165981	-0.00456918			gene583	gene10293	gene583									gene3950	gene4845	gene3950
gene4680	0.016573	-0.00513368			gene4680	gene9779	gene4680									gene7374	gene10533	gene7374
gene12144	0.0165569	0.0299657			gene12144	gene5010	gene12144									gene9876	gene9845	gene9876
gene7417	0.0165457	0.0160563			gene7417	gene9139	gene7417									gene6240	gene7522	gene6240
gene9285	0.0165159	0.00229538			gene9285	gene495	gene9285									gene10678	gene5497	gene10678
gene3577	0.0164798	-0.0103069			gene3577	gene8379	gene3577									gene815	gene12176	gene815
gene2965	0.0164371	0.00709717			gene2965	gene4275	gene2965									gene5524	gene5829	gene5524
gene3004	0.016424	0.0356654			gene3004	gene11633	gene3004									gene9170	gene10400	gene9170
gene8669	0.016396	-0.0256441			gene8669	gene9186	gene8669									gene8421	gene6073	gene8421
gene6964	0.0163897	0.049675			gene6964	gene5184	gene6964									gene4629	gene6045	gene4629
gene4485	0.0163419	-0.00239512			gene4485	gene10091	gene4485									gene11407	gene8923	gene11407
gene1280	0.0162718	-0.0101892			gene1280	gene5707	gene1280									gene5069	gene1273	gene5069
gene3251	0.0162573	-0.0136178			gene3251	gene4559	gene3251									gene12045	gene12175	gene12045
gene12201	0.0162415	-0.0237007			gene12201	gene10072	gene12201									gene11020	gene119	gene11020
gene10642	0.0162305	0.00266367			gene10642	gene6039	gene10642									gene9800	gene9582	gene9800
gene5896	0.0161923	-0.00727104			gene5896	gene10308	gene5896									gene2325	gene9154	gene2325
gene6460	0.0161767	0.0161864			gene6460	gene1698	gene6460									gene5830	gene4188	gene5830
gene11178	0.0161651	0.0310905			gene11178	gene5000	gene11178									gene7498	gene12368	gene7498
gene2088	0.0161538	-0.00595903			gene2088	gene3649	gene2088									gene4074	gene10532	gene4074
gene9208	0.0161278	0.000789273			gene9208	gene7674	gene9208									gene11339	gene10501	gene11339
gene11168	0.0161252	-0.00304296			gene11168	gene7756	gene11168									gene9745	gene11715	gene9745
gene10613	0.016124	0.0270313			gene10613	gene5499	gene10613									gene11612	gene7756	gene11612
gene9908	0.0161116	-0.00300941			gene9908	gene6169	gene9908									gene6460	gene370	gene6460
gene4254	0.016079	0.0176842			gene4254	gene4620	gene4254									gene605	gene8661	gene605
gene9366	0.0160721	-0.00952663			gene9366	gene3469	gene9366									gene1216	gene12024	gene1216
gene945	0.0160508	-0.000470865			gene945	gene6307	gene945									gene10330	gene12206	gene10330
gene6336	0.0160467	0.00537038			gene6336	gene9999	gene6336									gene3725	gene6559	gene3725
gene3320	0.0160271	-0.0143682			gene3320	gene7677	gene3320									gene7417	gene11493	gene7417
gene7433	0.0160057	-0.00601833			gene7433	gene5505	gene7433									gene10426	gene6008	gene10426
gene11761	0.016003	-0.0107951			gene11761	gene4027	gene11761									gene6054	gene12371	gene6054
gene2066	0.0159811	0.00758971			gene2066	gene1908	gene2066									gene1539	gene933	gene1539
gene6659	0.0159124	-0.00832284			gene6659	gene9730	gene6659									gene9172	gene11858	gene9172
gene1809	0.0158993	0.0115073			gene1809	gene5092	gene1809									gene10668	gene5445	gene10668
gene10351	0.0158708	0.015563			gene10351	gene5667	gene10351									gene3087	gene4953	gene3087
gene11312	0.0158512	-0.00415003			gene11312	gene10664	gene11312									gene7442	gene1893	gene7442
gene10970	0.0157707	-0.00216158			gene10970	gene9803	gene10970									gene8454	gene5325	gene8454
gene3642	0.0157604	0.0155317			gene3642	gene9804	gene3642									gene8451	gene7130	gene8451
gene6890	0.0157584	0.0222129			gene6890	gene3181	gene6890									gene3728	gene10774	gene3728
gene6586	0.0157478	0.00913022			gene6586	gene2608	gene6586									gene11719	gene9348	gene11719
gene4170	0.0157431	0.0301984			gene4170	gene11858	gene4170									gene8677	gene2100	gene8677
gene2352	0.0157428	0.0167527			gene2352	gene6306	gene2352									gene1379	gene8667	gene1379
gene387	0.015728	-0.00312721			gene387	gene9772	gene387									gene7405	gene10309	gene7405
gene1098	0.0156982	0.00593913			gene1098	gene77	gene1098									gene11252	gene3530	gene11252
gene4774	0.0156809	0.0328574			gene4774	gene3722	gene4774									gene5715	gene5876	gene5715
gene3347	0.0156303	-0.00782607			gene3347	gene854	gene3347									gene5785	gene3383	gene5785
gene12321	0.015606	-0.0109404			gene12321	gene157	gene12321									gene5140	gene12373	gene5140
gene11286	0.0155994	0.0370957			gene11286	gene7673	gene11286									gene1554	gene6629	gene1554
gene9109	0.0155897	0.00593104			gene9109	gene11020	gene9109									gene4460	gene5991	gene4460
gene6799	0.0155558	-0.0125416			gene6799	gene4748	gene6799									gene2229	gene1186	gene2229
gene9924	0.0155322	-0.00999465			gene9924	gene5706	gene9924									gene10351	gene10302	gene10351
gene5396	0.0155106	-0.0253133			gene5396	gene8661	gene5396									gene7862	gene2201	gene7862
gene8526	0.015463	-0.00246215			gene8526	gene8667	gene8526									gene7970	gene12370	gene7970
gene158	0.0154622	0.0131739			gene158	gene4625	gene158									gene3642	gene8238	gene3642
gene1433	0.0154342	-0.00264935			gene1433	gene11021	gene1433									gene9788	gene5767	gene9788
gene1688	0.0154217	-0.0071238			gene1688	gene2168	gene1688									gene2859	gene4931	gene2859
gene8956	0.0154145	-0.00555709			gene8956	gene9277	gene8956									gene1088	gene8660	gene1088
gene4808	0.0154089	-0.00550498			gene4808	gene12220	gene4808									gene9245	gene11869	gene9245
gene4012	0.0153789	-0.0207406			gene4012	gene4026	gene4012									gene5713	gene10191	gene5713
gene1924	0.0153773	-0.000684084			gene1924	gene8660	gene1924									gene8252	gene9803	gene8252
gene494	0.015366	-0.00837571					gene6835											gene3148
gene6033	0.0153582	0.00188542					gene8008											gene3682
gene3870	0.0152604	-0.00228747					gene2845											gene10706
gene7245	0.0152461	0.00399481					gene11424											gene10622
gene7041	0.0152435	-0.00311742					gene4019											gene2903
gene10087	0.0152392	0.00571645					gene9792											gene6331
gene6538	0.0151891	0.00555902					gene6942											gene632
gene3572	0.015179	-0.0232806					gene6303											gene6093
gene1131	0.0151573	0.0292343					gene9385											gene8590
gene1649	0.0151509	-0.00765487					gene1196											gene6340
gene2807	0.0151508	0.010786					gene8441											gene10795
gene12280	0.0151459	-0.00768513					gene4737											gene11770
gene3517	0.0151361	-0.00657837					gene2458											gene2803
gene5384	0.0151342	0.00243485					gene10253											gene10957
gene7161	0.0151313	0.000964432					gene1749											gene7079
gene5546	0.0151187	0.0143327					gene6063											gene587
gene6828	0.0150601	0.0272652					gene4818											gene5788
gene11512	0.0150477	-0.0106208					gene10978											gene8044
gene985	0.0150475	-0.0080651					gene5315											gene2821
gene6441	0.0150438	0.0335849					gene7566											gene9943
gene8723	0.0150205	0.016963					gene3808											gene3153
gene4905	0.0150133	0.0435695					gene5413											gene10854
gene5283	0.0150046	8.04274e-05					gene1148											gene11744
gene1059	0.0149983	0.0122881					gene5427											gene3300
gene5143	0.0149907	0.0220222					gene7974											gene4933
gene1315	0.0149313	-0.00589403					gene8409											gene5186
gene2334	0.0149057	-0.0128297					gene1819											gene7208
gene6157	0.0148899	0.00244658					gene225											gene1767
gene1644	0.0148716	0.0361098					gene4419											gene1970
gene7266	0.0148585	-0.00549425					gene4976											gene9662
gene1912	0.0148267	-0.00391394					gene4763											gene4377
gene4574	0.0147935	0.00149222					gene5403											gene5518
gene2430	0.0147927	-0.00773991					gene6149											gene2345
gene11542	0.0147827	-0.00579515					gene8302											gene5888
gene8369	0.014769	0.0129179					gene12244											gene10225
gene7498	0.0147052	0.0162771					gene10359											gene1021
gene10418	0.0146819	-0.0120246					gene1755											gene8380
gene2731	0.0146694	-0.00537783					gene875											gene11122
gene9847	0.0146341	-0.00339852					gene9950											gene4936
gene9775	0.014631	0.0229858					gene3116											gene9950
gene10678	0.0146233	0.0164226					gene6244											gene2562
gene1060	0.014603	0.000548819					gene1242											gene3159
gene5620	0.0145876	0.00132455					gene4721											gene12193
gene8065	0.0145739	-0.00321031					gene7685											gene954
gene1156	0.0145432	0.0317387					gene1375											gene4243
gene5978	0.0145108	0.00515804					gene1393											gene9255
gene11809	0.0145095	-0.0207447					gene6819											gene3601
gene1720	0.0145055	-0.00998257					gene126											gene1739
gene11023	0.0144892	0.0106697					gene1527											gene12053
gene4247	0.0144757	-0.0250752					gene5041											gene5841
gene8462	0.0144685	0.00329581					gene4806											gene11164
gene11148	0.0144645	-0.00379052					gene9864											gene3168
gene1062	0.0144586	-0.016825					gene871											gene3022
gene295	0.0144566	-0.00642193					gene6850											gene6295
gene4537	0.0144388	-0.00102313					gene7745											gene12153
gene2331	0.0144253	-0.0104777					gene8422											gene1333
gene6713	0.0144219	-4.43961e-05					gene10498											gene9793
gene9259	0.014386	-0.00225439					gene7966											gene6512
gene75	0.0143695	-0.0200311					gene10630											gene11230
gene12164	0.0143377	-0.011064					gene3944											gene2540
gene2407	0.0143318	-0.0168658					gene2174											gene4180
gene1249	0.0142774	-0.000734784					gene4150											gene6634
gene5245	0.0142748	0.00473553					gene2035											gene2231
gene8880	0.0142615	0.0340996					gene11856											gene1953
gene11776	0.0142259	-0.00369192					gene10166											gene6821
gene9358	0.0142178	-0.00535147					gene8175											gene873
gene6255	0.014206	0.00274384					gene11398											gene9579
gene3480	0.0141808	-0.000614686					gene2745											gene5642
gene1943	0.014168	0.00288205					gene9525											gene493
gene6897	0.0141411	0.0376545					gene11052											gene9376
gene9690	0.0141397	0.00182033					gene11104											gene5731
gene3990	0.0141138	-0.0107649					gene2736											gene8259
gene3322	0.0140642	-0.0280477					gene11122											gene7705
gene11666	0.0140584	0.00705096					gene3721											gene2564
gene7191	0.014056	-0.00989092					gene8664											gene9661
gene11789	0.0140424	0.00464557					gene6273											gene6458
gene5273	0.0140141	-0.0089283					gene660											gene4639
gene3314	0.0139967	0.000225139					gene3298											gene7726
gene6424	0.0139919	-0.00593936					gene6211											gene7206
gene2539	0.013982	-0.0206368					gene3373											gene1507
gene1042	0.0139649	0.00362389					gene1228											gene1801
gene1006	0.0139563	-0.014242					gene3088											gene8916
gene12363	0.0139434	-0.0162228					gene7833											gene11195
gene10765	0.0139434	-0.00037646					gene2667											gene9476
gene5982	0.0139433	0.00302446					gene10399											gene3447
gene452	0.0139359	-0.0104209					gene2190											gene3199
gene1172	0.013915	-0.0056266					gene6288											gene11716
gene1951	0.0139122	-0.016706					gene9574											gene7987
gene5410	0.0139048	-0.0117803					gene3268											gene7428
gene563	0.0138979	-0.0221639					gene8720											gene5875
gene1227	0.0138696	-0.0167573					gene1325											gene4118
gene2002	0.0138609	0.0273092					gene7684											gene7578
gene5295	0.0138475	0.00482679					gene4070											gene7146
gene1814	0.013838	-0.0139927					gene2160											gene6416
gene4032	0.0138335	-0.00633268					gene7116											gene4429
gene12096	0.0138287	-0.00665383					gene3864											gene1064
gene9917	0.0138144	-0.00826378					gene6661											gene11316
gene1469	0.0138084	-0.0027888					gene12306											gene5962
gene4727	0.0137686	0.0128578					gene12247											gene6680
gene5488	0.0137516	-0.00773363					gene6398											gene12363
gene403	0.0137321	-0.00822418					gene12126											gene7406
gene8520	0.0137052	-0.00859723					gene2132											gene1362
gene1667	0.0136993	0.0524552					gene8568											gene3115
gene7037	0.0136879	-0.00571703					gene470											gene8218
gene395	0.013666	-0.00825335					gene6526											gene171
gene6200	0.0136619	0.0024753					gene1917											gene2815
gene9722	0.0136595	0.0106632					gene9600											gene9844
gene10431	0.0136543	-0.013182					gene8601											gene375
gene8697	0.0136508	0.0172367					gene2652											gene1279
gene3915	0.0136428	-0.00936242					gene7438											gene8500
gene10938	0.0136355	-0.00734298					gene226											gene9949
gene1259	0.01363	-0.00418004					gene537											gene6819
gene927	0.0136082	-0.00137867					gene3085											gene5603
gene4741	0.0136006	-0.00755203					gene2211											gene8374
gene11945	0.0135895	-0.00566246					gene7920											gene572
gene6979	0.0135881	-0.00345282					gene1949											gene5032
gene999	0.0135876	0.00918601					gene3267											gene6398
gene9234	0.013568	-0.011045					gene3082											gene2220
gene10733	0.0135614	0.0244475					gene4333											gene8427
gene8280	0.0135345	-0.00665251					gene4776											gene502
gene5596	0.013526	-0.0117491					gene2780											gene2466
gene10309	0.0135121	-0.0465776					gene5972											gene1951
gene1309	0.0135083	-0.0126705					gene11334											gene11471
gene2525	0.0134442	-0.00657357					gene1311											gene1227
gene1316	0.0134377	-0.0058652					gene10136											gene7136
gene4881	0.0134231	0.000628432					gene5675											gene7262
gene1142	0.0134157	0.0204103					gene5859											gene1062
gene3153	0.0134149	-0.0147645					gene10991											gene875
gene9363	0.0133605	0.0027133					gene10075											gene10202
gene4057	0.0133223	-0.00195124					gene11113											gene2326
gene1166	0.013314	0.0331075					gene7640											gene6063
gene5033	0.0132824	0.00892305					gene8873											gene3164
gene5733	0.0132818	-0.00489217					gene5356											gene2407
gene11382	0.0132636	-0.00040746					gene3266											gene11994
gene7533	0.0132578	-0.00603957					gene9749											gene8443
gene5519	0.0132444	0.00174028					gene10347											gene3288
gene6574	0.0132361	0.0416863					gene826											gene3108
gene4000	0.0132006	-0.00891799					gene10626											gene1128
gene5935	0.0131861	0.0352741					gene8454											gene9111
gene4931	0.0131742	-0.0571319					gene5847											gene9863
gene10951	0.0131732	0.00561766					gene8607											gene12199
gene8933	0.0131448	0.0195082					gene4193											gene273
gene547	0.0131371	-0.0125624					gene1073											gene8213
gene10350	0.013133	0.022268					gene4752											gene1885
gene8366	0.0131097	0.0062014					gene7024											gene1640
gene10307	0.0131079	0.0081793					gene11085											gene7386
gene3128	0.0130999	-0.00266864					gene7892											gene8123
gene10584	0.0130934	-0.00407644					gene7546											gene9792
gene7922	0.0130768	0.00981883					gene11722											gene12344
gene10786	0.0130612	-0.00530131					gene8007											gene10169
gene8732	0.0130544	0.00272668					gene12117											gene4084
gene363	0.0130536	0.015118					gene3118											gene1639
gene1555	0.0130346	0.00518487					gene7919											gene8657
gene12001	0.0130333	-0.00820661					gene2578											gene1952
gene1496	0.0130142	-0.00598891					gene4280											gene10220
gene1906	0.0129725	-0.00286094					gene3429											gene10092
gene8028	0.0129672	0.00513223					gene8004											gene5983
gene4773	0.0129387	0.00747954					gene2254											gene3439
gene10170	0.0129318	0.00241328					gene5098											gene7906
gene11351	0.0128847	0.0330582					gene8983											gene86
gene4389	0.0128824	0.0281516					gene5188											gene1894
gene11175	0.0128704	-0.00112517					gene6929											gene2772
gene4890	0.0128629	-0.000368364					gene4130											gene8788
gene11056	0.0128596	-0.00791916					gene1870											gene12121
gene5060	0.0128574	0.0141088					gene4743											gene11968
gene5875	0.0128562	-0.0161045					gene6753											gene2194
gene12372	0.0128517	-0.0182872					gene7374											gene6455
gene359	0.012785	-0.00360861					gene8220											gene491
gene6058	0.0127772	-0.00177552					gene3096											gene4776
gene4352	0.0127582	-0.00573973					gene10752											gene8237
gene10041	0.0127577	-0.00986839					gene4188											gene6638
gene7912	0.0127556	0.0152417					gene1950											gene3162
gene12110	0.0127511	-0.00298405					gene1069											gene2167
gene9658	0.0127404	-0.0071074					gene1739											gene7124
gene10843	0.0127346	-0.0101588					gene8187											gene9951
gene9788	0.0127303	0.0155277					gene2251											gene11751
gene7942	0.0127216	-0.000241868					gene6776											gene7147
gene9585	0.0127205	0.0152374					gene7394											gene2861
gene5437	0.0127142	-0.0186349					gene6008											gene6284
gene4924	0.0126614	-0.0102099					gene2968											gene8007
gene3037	0.0126408	0.0107072					gene7094											gene1181
gene9592	0.0126305	-0.0052699					gene3795											gene715
gene7391	0.0126054	-0.00491368					gene79											gene10045
gene8110	0.0126042	-0.00818775					gene4932											gene6939
gene3987	0.0125883	-0.0100858					gene10140											gene8338
gene356	0.0125856	0.0260855					gene9245											gene524
gene12024	0.0125733	-0.0388984					gene5415											gene1821
gene12021	0.0125566	-0.0143652					gene2804											gene10687
gene7456	0.0125484	-0.00484682					gene7079											gene11080
gene1038	0.0125136	0.00696971					gene2466											gene11530
gene7419	0.0125064	0.0258917					gene6214											gene11496
gene4914	0.0125049	-0.00156377					gene9154											gene7625
gene6763	0.0124904	-0.00250155					gene11343											gene12372
gene7291	0.012481	0.00561801					gene10456											gene413
gene11637	0.0124713	0.0502851					gene5968											gene435
gene7855	0.0124535	0.0180161					gene7571											gene1884
gene4742	0.0124363	-0.000465563					gene10886											gene10122
gene9362	0.0124164	-9.70942e-05					gene11653											gene730
gene7248	0.01241	-0.019781					gene2548											gene3533
gene10831	0.0124096	-0.00856153					gene10515											gene1053
gene5975	0.0124078	-0.000243165					gene7576											gene6288
gene4709	0.0123983	-0.0022694					gene8414											gene328
gene8923	0.0123973	-0.0357745					gene2775											gene3808
gene8718	0.012388	-0.0092352					gene7554											gene8871
gene3260	0.012379	-0.00242954					gene11615											gene8687
gene5991	0.0123773	-0.0507557					gene7574											gene3428
gene3100	0.0123595	-0.00729377					gene9949											gene8746
gene9603	0.0123491	0.011507					gene8864											gene740
gene311	0.0123391	0.0065183					gene7381											gene10503
gene3643	0.0123341	0.00324627					gene6196											gene6688
gene3013	0.012331	-0.0194742					gene8367											gene10121
gene9262	0.0123282	-8.63217e-05					gene3078											gene3581
gene8275	0.0123107	7.92504e-05					gene2770											gene1022
gene9376	0.0123086	-0.015745					gene213											gene9561
gene10538	0.0123014	0.00669562					gene8990											gene5437
gene580	0.0122832	0.00477127					gene3865											gene2945
gene10437	0.0122818	-0.00735369					gene2034											gene867
gene9661	0.0122778	-0.0158309					gene11465											gene5945
gene10773	0.0122714	0.00905715					gene2114											gene5505
gene8935	0.0122646	-0.0202498					gene11461											gene7592
gene5138	0.0122467	0.00512829					gene9062											gene10165
gene8378	0.012246	0.00384332					gene9912											gene11758
gene10268	0.0122405	0.00865433					gene6498											gene10624
gene723	0.0122319	-0.00222431					gene3674											gene7701
gene10105	0.0122292	-0.000987454					gene9960											gene8027
gene11944	0.0122235	-0.00865894					gene11230											gene9463
gene4464	0.0122132	0.00928259					gene12215											gene6624
gene1379	0.0122118	0.0158051					gene2467											gene734
gene1687	0.0122074	-0.0104067					gene7282											gene2600
gene10121	0.0122024	-0.0185825					gene11649											gene6927
gene5146	0.0122014	0.0135184					gene8455											gene9184
gene3587	0.0121873	0.0446554					gene5362											gene5589
gene1640	0.0121696	-0.0170645					gene7884											gene10313
gene1826	0.0121634	-0.00354257					gene7053											gene8678
gene4837	0.0121539	-0.000930721					gene7701											gene3013
gene6020	0.012136	-0.00645133					gene10267											gene9080
gene5816	0.0121155	0.0178827					gene9086											gene3696
gene3099	0.0120552	-0.00393028					gene3771											gene10401
gene4504	0.0120454	0.00421241					gene6248											gene7845
gene8640	0.01202	0.028744					gene7390											gene11088
gene8957	0.0120104	0.00971449					gene8622											gene10091
gene5436	0.0120088	0.00054697					gene1128											gene3132
gene9727	0.0119857	0.00813728					gene9793											gene3060
gene7860	0.0119811	-0.00245036					gene11570											gene3812
gene10113	0.0119792	-0.013891					gene5374											gene12326
gene5559	0.0119762	0.0015163					gene12284											gene7248
gene813	0.0119713	-0.00682283					gene10660											gene719
gene66	0.0119515	0.00786287					gene12070											gene6482
gene6465	0.0118608	0.009849					gene7056											gene7116
gene1562	0.0118364	-0.0033102					gene2330											gene5973
gene1272	0.0118281	0.00864783					gene3530											gene814
gene9601	0.011824	0.0199424					gene887											gene389
gene4900	0.0117605	0.0122192					gene10191											gene75
gene931	0.0117472	-0.00471427					gene5840											gene8379
gene6880	0.0117353	-0.012935					gene9246											gene1983
gene9420	0.0117329	-0.00346962					gene2532											gene4310
gene11319	0.0117189	-0.00697269					gene6518											gene8041
gene9564	0.0117136	-0.00229504					gene2327											gene2257
gene657	0.0116796	0.00163936					gene7328											gene4884
gene400	0.0116757	0.000641666					gene3195											gene8935
gene5725	0.0116494	0.000956427					gene5325											gene6495
gene3316	0.0116426	0.0198724					gene4751											gene11802
gene2177	0.011638	-0.00596337					gene11770											gene76
gene10100	0.0116131	-0.00415611					gene119											gene3265
gene4393	0.0116115	-0.00157802					gene3654											gene393
gene7405	0.0116101	0.0158005					gene11914											gene4510
gene4879	0.0116039	0.00830901					gene1021											gene3867
gene9919	0.0115979	0.00027463					gene1725											gene10435
gene5680	0.0115919	0.0232785					gene10167											gene6498
gene3432	0.0115909	-0.0245938					gene10963											gene7042
gene3038	0.0115909	-0.000912771					gene8253											gene6436
gene5302	0.011582	0.0044831					gene1492											gene6453
gene11307	0.011572	0.000420302					gene12222											gene1980
gene1983	0.0115639	-0.0201083					gene10410											gene4748
gene293	0.0115504	-0.00385885					gene10992											gene2539
gene8726	0.0115419	0.00651813					gene5487											gene12017
gene9100	0.0115355	-0.0113232					gene3784											gene11966
gene2938	0.0115346	0.00546604					gene11026											gene4012
gene3162	0.0114966	-0.0177632					gene9638											gene11809
gene8461	0.0114845	0.0120433					gene7501											gene11142
gene1885	0.0114838	-0.0170499					gene7890											gene11387
gene1278	0.011482	-0.00920773					gene6073											gene12325
gene6570	0.0114798	0.0366607					gene5011											gene7313
gene7315	0.0114763	-0.00401297					gene4117											gene157
gene8089	0.0114749	-0.00787993					gene3299											gene1975
gene320	0.0114733	-0.00278156					gene8043											gene9600
gene8182	0.0114724	0.00369358					gene7976											gene12334
gene4939	0.0114713	0.00703705					gene7023											gene11398
gene4225	0.011462	-0.0216497					gene10400											gene4691
gene541	0.0114573	-0.00755699					gene4648											gene11993
gene4554	0.0114554	-0.00062232					gene12289											gene7045
gene1035	0.0114386	0.0300895					gene5957											gene5693
gene8992	0.0114227	-0.0050828					gene7724											gene11866
gene8292	0.0114029	-0.0144102					gene3428											gene9117
gene3601	0.0114011	-0.0151172					gene7105											gene7381
gene6669	0.0113868	-0.00998714					gene11901											gene3814
gene5504	0.0113793	-0.0013752					gene3161											gene6851
gene9974	0.0113713	-0.0140946					gene11407											gene2665
gene6065	0.0113658	-0.011654					gene6944											gene1705
gene6220	0.0113614	-0.000291499					gene2068											gene2667
gene4654	0.011359	-0.00328957					gene3814											gene2037
gene3477	0.0113582	-0.00760878					gene9547											gene12284
gene746	0.0113428	-0.00204963					gene9408											gene7344
gene4884	0.0113422	-0.0202309					gene10218											gene4225
gene6844	0.0113392	0.00498876					gene6324											gene11916
gene2879	0.0113319	0.00947022					gene4243											gene9836
gene8964	0.0113275	-0.00700529					gene2600											gene6602
gene5605	0.0113259	0.0220578					gene8998											gene2101
gene7142	0.0113197	-1.40989e-05					gene9221											gene3700
gene9540	0.0113122	0.00709817					gene9340											gene563
gene3502	0.011285	-0.00785356					gene1798											gene9749
gene7134	0.011259	-0.00580193					gene3737											gene10505
gene3439	0.011257	-0.0174381					gene475											gene8564
gene9429	0.0112547	-0.00377245					gene4450											gene4985
gene2735	0.0112543	0.00961934					gene8427											gene8260
gene10650	0.0112509	0.00189537					gene2674											gene208
gene4698	0.0112434	0.00321465					gene4617											gene3636
gene8139	0.0112385	-0.0138949					gene434											gene7690
gene1437	0.011229	-0.0035843					gene10429											gene1916
gene3416	0.0112282	0.0239728					gene4168											gene9086
gene8587	0.0112234	-0.000540053					gene946											gene4852
gene6696	0.011203	0.018812					gene9153											gene11510
gene11917	0.0111933	-0.00546876					gene989											gene3572
gene1520	0.011187	-0.000474584					gene2											gene12365
gene9327	0.0111709	-6.80188e-05					gene5801											gene5184
gene10924	0.0111553	-0.00125442					gene10387											gene7918
gene8808	0.0111505	-0.000263858					gene10165											gene9718
gene57	0.0111478	0.00302756					gene9870											gene1600
gene5420	0.0111394	0.00938094					gene10169											gene5957
gene4601	0.0111394	-0.00903146					gene8270											gene1979
gene1389	0.0111245	0.00395054					gene1376											gene2012
gene905	0.0111238	-0.00841538					gene9088											gene12201
gene3348	0.0111215	0.00915857					gene7310											gene8187
gene11093	0.0111182	-0.00148948					gene1186											gene10039
gene1526	0.0111107	0.00838423					gene8421											gene2068
gene3753	0.0111087	-0.00563977					gene5701											gene10046
gene4551	0.0110986	-0.01037					gene1910											gene919
gene11930	0.0110923	-0.000289718					gene9091											gene2633
gene10677	0.0110666	-0.00284265					gene6116											gene10534
gene6155	0.0110468	0.00726845					gene3813											gene1978
gene8493	0.0110314	0.0097999					gene10747											gene11238
gene11803	0.0110128	0.00883089					gene4649											gene10527
gene4433	0.0109993	-0.0106233					gene12043											gene10056
gene3908	0.0109986	0.00526411					gene8260											gene386
gene9596	0.010994	-0.0121151					gene2810											gene5895
gene801	0.0109773	0.000724835					gene8081											gene3432
gene9848	0.0109724	0.0033276					gene7313											gene2567
gene1367	0.0109593	0.0180956					gene7516											gene10421
gene372	0.0109549	-0.00631714					gene1067											gene8043
gene8578	0.0109289	-0.00292838					gene5412											gene12293
gene1208	0.0109162	0.000765815					gene5829											gene5095
gene6899	0.0109095	-0.0048199					gene9348											gene1982
gene12019	0.0109009	0.0220968					gene2230											gene4247
gene2720	0.0108997	0.0209815					gene8794											gene10800
gene6779	0.0108959	0.020836					gene10750											gene6275
gene8477	0.0108908	0.00118072					gene1022											gene2649
gene7886	0.0108776	-0.0278862					gene8576											gene5396
gene7798	0.010875	-0.000130819					gene6445											gene5163
gene1273	0.0108482	-0.0358999					gene1248											gene3492
gene2540	0.010848	-0.0154314					gene10788											gene9816
gene12368	0.0108419	-0.0376636					gene5830											gene784
gene8078	0.0108321	0.00250202					gene8041											gene8669
gene5742	0.0108313	0.00104292					gene5023											gene1804
gene10132	0.0108202	0.000472026					gene9288											gene5938
gene2098	0.0108041	0.00335557					gene8380											gene1974
gene969	0.0107945	-0.00307732					gene8331											gene8668
gene7537	0.0107936	-0.00530325					gene9407											gene12331
gene1857	0.0107931	-0.00499127					gene192											gene3745
gene6221	0.0107907	-0.00807514					gene2601											gene5687
gene12171	0.0107853	-0.00217746					gene291											gene6632
gene12281	0.0107849	-0.00129439					gene208											gene9719
gene9731	0.0107682	0.00642705					gene8768											gene3061
gene4904	0.010756	0.00172998					gene6045											gene1981
gene10663	0.0107293	0.0335696					gene3932											gene3878
gene2725	0.0107047	0.00354491					gene10074											gene5494
gene8226	0.0106909	-0.00843897					gene7729											gene10504
gene2877	0.0106827	0.0206165					gene11454											gene3273
gene1264	0.0106818	-0.00434588					gene10894											gene9864
gene3866	0.0106663	-0.00704937					gene2653											gene2664
gene11373	0.0106555	-0.00340116					gene7749											gene6518
gene2691	0.0106287	-0.00525339					gene5869											gene7108
gene5662	0.0106252	-0.00743253					gene9716											gene1749
gene505	0.0106182	0.0261367					gene7335											gene5771
gene12053	0.0106162	-0.0151472					gene2803											gene5664
gene7664	0.0106073	0.0231383					gene2188											gene6740
gene4203	0.0106072	0.0124233					gene6851											gene2526
gene3086	0.0106027	-0.00314746					gene5466											gene716
gene4891	0.0106026	-0.00192316					gene1815											gene9509
gene71	0.0106024	0.00820455					gene6378											gene10093
gene9044	0.0105946	-0.00565934					gene10581											gene7886
gene7183	0.0105628	-0.00697847					gene11510											gene12332
gene7797	0.0105586	-0.00584347					gene4676											gene1592
gene11475	0.0105518	-0.00221313					gene1066											gene2810
gene1282	0.010539	0.0272035					gene8309											gene10230
gene5804	0.0105325	-0.00718193					gene1804											gene3322
gene11724	0.0105274	0.0175144					gene5038											gene4070
gene11801	0.0105139	-0.0107009					gene3783											gene8713
gene1866	0.010506	-0.00465208					gene615											gene7404
gene6098	0.0104727	0.00267446					gene6172											gene6303
gene4501	0.0104687	-0.00631462					gene9117											gene2527
gene4533	0.0104686	-0.00879987					gene6041											gene5499
gene9325	0.0104525	0.00360951					gene7333											gene3771
gene5641	0.0104382	0.030137					gene10302											gene6710
gene11297	0.0104307	0.0035637					gene11718											gene1976
gene11288	0.0104253	0.00410192					gene3149											gene1723
gene11299	0.0104245	-0.00303429					gene7523											gene856
gene1016	0.0104207	0.00804891					gene1675											gene5566
gene8849	0.0104187	0.00185935					gene11822											gene10987
gene1518	0.010395	0.0130168					gene8668											gene1066
gene2374	0.0103948	-0.00939195					gene9933											gene837
gene11663	0.0103933	0.0138241					gene9720											gene3158
gene8241	0.0103905	-0.00745896					gene7334											gene2601
gene1543	0.0103821	0.0545944					gene11350											gene8665
gene10946	0.0103512	-0.0036186					gene64											gene10399
gene12177	0.0103504	-0.000513344					gene6954											gene8581
gene5585	0.0103458	-0.00504095					gene3467											gene5469
gene3970	0.0103438	-0.00652434					gene5163											gene1067
gene11295	0.0103405	-0.0130758					gene5709											gene3172
gene11760	0.0103199	-0.00043729					gene4091											gene7917
gene6993	0.0102944	-0.00719056					gene3383											gene9153
gene2396	0.0102905	0.025301					gene76											gene5877
gene3977	0.0102889	-0.0119304					gene4621											gene11350
gene6914	0.0102858	-0.00532628					gene7713											gene251
gene3974	0.0102811	-0.00787706					gene10294											gene1662
gene623	0.0102748	0.0347624					gene3605											gene12023
gene11879	0.0102735	-0.00489964					gene6074											gene12369
gene3476	0.0102561	-0.00017001					gene4764											gene9730
gene11302	0.0102438	-0.00508851					gene4845											gene2406
gene5039	0.0102428	0.00264286					gene9635											gene4018
gene5716	0.0102308	0.0173283					gene10293											gene4845
gene3129	0.0102298	-0.000904245					gene9779											gene10533
gene106	0.0102248	-0.0032815					gene5010											gene9845
gene10575	0.010215	-0.00106962					gene9139											gene7522
gene1144	0.0102095	-0.000669067					gene495											gene5497
gene3942	0.010177	-0.0114745					gene8379											gene12176
gene3687	0.010164	0.000839349					gene4275											gene5829
gene2834	0.0101612	-0.00993003					gene11633											gene10400
gene5989	0.0101603	0.000110761					gene9186											gene6073
gene9743	0.0101555	-0.0056437					gene5184											gene6045
gene1396	0.0101427	0.00901422					gene10091											gene8923
gene11159	0.0101425	-0.00226191					gene5707											gene1273
gene7817	0.0101418	0.0265333					gene4559											gene12175
gene9656	0.0101371	-0.00306028					gene10072											gene119
gene1789	0.0101366	-0.00382566					gene6039											gene9582
gene3872	0.0101271	-0.00902882					gene10308											gene9154
gene11932	0.010123	0.0090674					gene1698											gene4188
gene6202	0.0101227	-0.00265277					gene5000											gene12368
gene11478	0.0100886	0.000394606					gene3649											gene10532
gene7795	0.0100883	-0.00195792					gene7674											gene10501
gene1965	0.0100831	-0.00757083					gene7756											gene11715
gene3859	0.010074	0.00757889					gene5499											gene7756
gene12033	0.0100707	0.0120269					gene6169											gene370
gene6396	0.0100659	-0.00588843					gene4620											gene8661
gene3678	0.0100344	0.0477507					gene3469											gene12024
gene1954	0.0100295	-0.0139829					gene6307											gene12206
gene8741	0.0100246	-0.0131916					gene9999											gene6559
gene11314	0.0100243	-0.00323597					gene7677											gene11493
gene12113	0.0100228	-0.0131027					gene5505											gene6008
gene10300	0.0100227	-0.0107212					gene4027											gene12371
gene12002	0.0100143	-0.00389814					gene1908											gene933
gene416	0.0100113	-0.000706449					gene9730											gene11858
gene4738	0.00998196	0.0335285					gene5092											gene5445
gene1310	0.00997734	-0.00707583					gene5667											gene4953
gene4152	0.0099586	-0.0026262					gene10664											gene1893
gene4815	0.00995506	-0.00449315					gene9803											gene5325
gene8544	0.0099534	-0.00812607					gene9804											gene7130
gene8136	0.00994506	-0.00816514					gene3181											gene10774
gene10950	0.00993875	-0.00561499					gene2608											gene9348
gene11986	0.00991675	-0.00993337					gene11858											gene2100
gene4406	0.0099167	-0.00530239					gene6306											gene8667
gene6331	0.00990603	-0.0144988					gene9772											gene10309
gene10968	0.00990365	0.00142045					gene77											gene3530
gene11619	0.00989283	0.00452246					gene3722											gene5876
gene6602	0.00988404	-0.0218443					gene854											gene3383
gene2109	0.00988004	0.00292507					gene157											gene12373
gene1143	0.00986159	0.00575271					gene7673											gene6629
gene2661	0.00985754	0.000934659					gene11020											gene5991
gene4227	0.00984227	-0.00721022					gene4748											gene1186
gene2240	0.00983027	-0.00688046					gene5706											gene10302
gene7075	0.00982599	-0.0060325					gene8661											gene2201
gene9946	0.00982242	0.000955657					gene8667											gene12370
gene7143	0.00981752	-0.0119					gene4625											gene8238
gene6956	0.00981287	-0.00671338					gene11021											gene5767
gene9846	0.00980688	-0.0086408					gene2168											gene4931
gene6128	0.00980384	3.02361e-05					gene9277											gene8660
gene9910	0.00980044	0.00206215					gene12220											gene11869
gene6448	0.00979301	-0.00654071					gene4026											gene10191
gene8581	0.00978741	-0.0307001					gene8660											gene9803
gene4311	0.00978193	-0.00912447
gene10820	0.00976311	-0.00244092
gene2302	0.00975419	-0.00900486
gene8023	0.00974143	0.00275175
gene550	0.0097408	0.0231038
gene12312	0.00973783	-0.000255485
gene4330	0.00972829	-0.00745703
gene10026	0.00972817	0.0182345
gene11091	0.00972623	-0.00116076
gene11979	0.00972148	0.0185853
gene6385	0.00971779	0.00853206
gene3111	0.0097082	-0.00313637
gene5608	0.00970617	-0.000514756
gene7650	0.00969674	0.00889646
gene8111	0.00969448	-0.00152929
gene10236	0.00969242	0.00448742
gene8061	0.00968677	-0.0036336
gene8564	0.00967893	-0.0222203
gene8062	0.00967802	0.0100697
gene6575	0.00967777	0.0109283
gene1681	0.00965617	0.000337921
gene6530	0.00965251	-0.0121506
gene11276	0.00964538	-0.00552991
gene7039	0.0096357	-0.00583272
gene11640	0.00962759	-0.00265178
gene9972	0.00960492	0.00858069
gene3271	0.00958745	-0.0100373
gene5230	0.00956947	0.0100579
gene5014	0.00956044	-0.00160394
gene6873	0.0095517	0.00205482
gene6711	0.00954437	-0.0100049
gene9699	0.00954274	-0.0016669
gene570	0.00953826	0.000676029
gene5193	0.00953418	0.00659855
gene4560	0.00953364	0.00424051
gene1408	0.00953148	4.05819e-05
gene824	0.00952685	-0.00279458
gene1193	0.0095211	-0.00234578
gene4010	0.00952023	-0.00202062
gene9270	0.00951137	-0.00645167
gene6199	0.00948635	0.00936095
gene2406	0.00948547	-0.0336597
gene10544	0.00947734	-0.000691607
gene11834	0.0094772	0.000197341
gene5027	0.0094772	-0.000406122
gene4360	0.00947081	0.00993947
gene11664	0.00945903	-0.000993985
gene3884	0.00945307	-0.0110084
gene8046	0.00945233	-0.00765015
gene5083	0.00944865	-0.00300024
gene2169	0.00944652	-0.00691312
gene10988	0.00941746	-0.00394209
gene4320	0.00941612	-0.00148273
gene2158	0.00940533	0.000531962
gene700	0.00940217	-0.00451561
gene11676	0.00939201	-0.00110367
gene6573	0.00938424	0.00963649
gene10104	0.00938113	-0.0136578
gene10090	0.00938105	0.00207965
gene6106	0.00937975	-0.000971012
gene12112	0.00937752	0.00198941
gene1105	0.00936928	0.00426495
gene8261	0.00935325	0.00642704
gene2119	0.00934316	-0.00529344
gene4666	0.00933432	-0.00624283
gene10523	0.00933065	-0.00426773
gene2943	0.00932853	-0.0020347
gene7706	0.00932797	0.000123743
gene12241	0.00932627	0.00455082
gene5120	0.00932337	0.0178273
gene3762	0.00932193	-0.00488939
gene7069	0.00932132	-0.00111656
gene7220	0.0093192	-0.00954927
gene3352	0.00928069	0.00507631
gene7777	0.00928063	2.81117e-06
gene7109	0.00926764	-0.00970593
gene7468	0.00926369	-0.00369675
gene170	0.00926153	0.00179851
gene1211	0.00925645	0.00162329
gene7704	0.00925113	-0.00283307
gene2445	0.00925049	0.00154375
gene5555	0.00924636	0.0239363
gene7660	0.00924576	-0.00714085
gene3821	0.00923865	-0.00697276
gene12286	0.00923374	0.0123774
gene11656	0.00922891	-0.00388387
gene6997	0.00922779	-0.00893485
gene651	0.0092235	-0.00269092
gene1613	0.00921734	0.00196467
gene1862	0.00921457	-0.00289124
gene9969	0.0092137	0.00884575
gene4744	0.0092102	3.11932e-05
gene12134	0.00920751	-0.00764238
gene9686	0.00920315	0.00546628
gene1985	0.00920315	-0.0111782
gene85	0.00919258	-0.00862975
gene9517	0.00918727	-0.00646607
gene2793	0.00918357	-0.00352009
gene2925	0.00917737	-0.00431719
gene11692	0.00917524	0.00136746
gene6666	0.00917491	-0.00047276
gene1057	0.00917224	-0.00991376
gene3353	0.00916201	0.00579834
gene9856	0.0091612	0.0290666
gene2730	0.00915695	0.00261247
gene2283	0.00915476	0.000517132
gene7591	0.00915113	-0.000487882
gene8531	0.0091397	0.00862705
gene1733	0.00911366	-0.00288011
gene1231	0.00910389	0.00148737
gene10743	0.00910056	-0.00635238
gene4281	0.00909383	0.00960547
gene7868	0.00909381	0.00121959
gene10846	0.00909255	-0.00338277
gene1952	0.00908121	-0.0172486
gene8913	0.00908018	-0.000334598
gene8412	0.00906016	0.0064154
gene10039	0.00905587	-0.0238234
gene1841	0.00905094	-0.000105965
gene1858	0.00904946	0.00459761
gene2257	0.00904641	-0.0202054
gene8975	0.00904612	-0.000124258
gene4088	0.00904479	6.32e-05
gene6463	0.00903745	0.00572743
gene9250	0.00901945	-0.00415874
gene5316	0.00901883	-0.00954193
gene457	0.00901109	-0.00084026
gene11329	0.00901073	-0.000821006
gene7411	0.00900772	-0.0107244
gene1915	0.00900751	0.00531183
gene1439	0.00900642	-0.00429887
gene6218	0.00898949	0.00313375
gene5430	0.00898287	-0.00645572
gene11293	0.00897647	0.00981117
gene303	0.00897489	-0.00118336
gene11964	0.00897228	0.000872826
gene4961	0.00896494	-0.00108432
gene5208	0.00896449	0.000108895
gene429	0.00895722	0.00687168
gene324	0.00895174	-0.00148398
gene7805	0.00894977	-0.00870262
gene12274	0.00894941	-0.00197437
gene10197	0.00894886	0.000884138
gene7060	0.00894454	-0.00801046
gene10450	0.0089408	0.0182156
gene12264	0.00893889	-0.00133434
gene10651	0.00893734	-0.0106667
gene1728	0.00893624	0.0101998
gene9400	0.00893239	-4.54985e-05
gene5594	0.00892771	0.00386282
gene339	0.0089232	0.00124394
gene2293	0.00892032	0.00332467
gene7099	0.00891872	-0.0049793
gene6543	0.00891828	-0.00315651
gene8727	0.00890735	-0.0077075
gene5584	0.00890637	-0.00249709
gene6974	0.00889782	0.0126531
gene8382	0.00889583	7.22308e-05
gene329	0.00889525	-0.0116183
gene5736	0.00889381	-0.00740345
gene6375	0.00889187	-0.00276922
gene3049	0.0088887	-0.00376743
gene10966	0.00887249	-0.00277689
gene2108	0.0088646	0.0290809
gene12276	0.00885352	0.000423873
gene6406	0.00885122	0.00541971
gene10969	0.00878772	-0.0123191
gene1903	0.00878671	-0.00220582
gene1974	0.00878379	-0.0257529
gene1978	0.00878204	-0.0242488
gene804	0.00878086	-0.00810882
gene9169	0.00877931	0.00926302
gene10850	0.0087783	-0.000997683
gene8118	0.00877751	-0.00304261
gene7153	0.00877615	-0.00423834
gene11274	0.00876846	-0.0101251
gene6879	0.00876267	0.00613149
gene6962	0.00875406	-0.010463
gene7007	0.00875312	-0.00590983
gene7302	0.00875066	0.00566321
gene3134	0.00873632	-0.0118203
gene8222	0.00873621	-0.000644622
gene11068	0.00873409	0.00216243
gene358	0.00872448	-0.00513369
gene8953	0.00871093	-0.00193865
gene8828	0.00870353	-0.00385249
gene1718	0.00869882	-0.00681065
gene12333	0.00869039	-0.0063768
gene231	0.00868813	-0.0131253
gene7504	0.00868442	0.000138672
gene527	0.00868403	-0.00623088
gene3996	0.00867935	-0.00420164
gene10877	0.0086648	0.0298004
gene2440	0.00865942	0.00497154
gene4470	0.00865794	0.00969208
gene257	0.00865752	0.0176025
gene4926	0.00864474	-0.00617239
gene214	0.00863125	0.000465397
gene2203	0.00863034	0.00641774
gene8907	0.00862748	-0.00204436
gene4272	0.00860555	-0.00212625
gene149	0.00860278	-0.0108481
gene10718	0.00859629	-0.00141032
gene4910	0.00857581	-0.00268945
gene9000	0.00856518	0.0108677
gene3144	0.0085626	-0.00738538
gene10686	0.0085586	0.00226709
gene2739	0.00855185	0.0012576
gene9356	0.00855013	-0.00487127
gene8221	0.00854687	-0.00343578
gene5965	0.0085467	0.00860134
gene5987	0.00854628	0.0138059
gene5459	0.00853982	0.00163795
gene10556	0.0085375	-0.00853414
gene781	0.00853159	-0.00404189
gene9172	0.00853156	0.0159438
gene3511	0.0085289	0.00017894
gene3958	0.00852476	-0.00815959
gene6185	0.00852284	-0.00138728
gene3230	0.00851718	-0.00671936
gene10709	0.0085143	-0.00212199
gene334	0.00850229	0.00264268
gene3359	0.00849387	-0.00559992
gene997	0.0084715	-0.00591358
gene3927	0.00846739	-0.0053699
gene2107	0.00846677	-0.00379212
gene5748	0.00846445	-0.0120579
gene5598	0.00845951	0.00387547
gene266	0.00845914	0.00315795
gene9422	0.0084537	-0.00138894
gene11584	0.00845161	-0.00553025
gene1304	0.00845111	0.00587276
gene12302	0.00844921	-0.00752957
gene1459	0.00844545	-0.0109231
gene7294	0.00844503	-0.00903627
gene5474	0.00844241	0.0101851
gene7137	0.00843835	-0.00266343
gene2727	0.00843509	0.00957425
gene1423	0.00841684	-0.00376846
gene4398	0.00841335	-0.00273952
gene1181	0.00840566	-0.0179635
gene2994	0.00839788	0.0050926
gene9931	0.00839394	-0.000811707
gene5086	0.0083874	-0.00147734
gene5407	0.00838593	0.00651098
gene10715	0.00838199	-0.000497319
gene5421	0.00838034	0.000784799
gene8336	0.00837724	-0.00611816
gene2827	0.00837591	0.00254429
gene8815	0.00836575	-0.000208321
gene5568	0.00836444	-0.00786177
gene8383	0.0083592	0.0174692
gene6842	0.00835837	0.0132803
gene6650	0.00835393	0.00226874
gene2733	0.0083527	-0.001735
gene4407	0.00833846	-0.00602467
gene9625	0.00832392	-0.00366812
gene934	0.00832312	-0.00732676
gene6122	0.0083195	-0.00167934
gene12296	0.00831918	0.000788998
gene9041	0.00831788	-0.00023004
gene4313	0.00830799	-0.00311502
gene6290	0.0083046	-0.0111637
gene3482	0.00830239	-0.000701099
gene10114	0.00829372	0.00301231
gene893	0.00829354	-0.00318676
gene4003	0.00828577	-0.00157104
gene1957	0.00828522	-0.008241
gene11017	0.0082838	0.00355869
gene2633	0.00827988	-0.0242213
gene6123	0.00827939	-0.00494617
gene1771	0.00827373	-0.00983637
gene36	0.00826736	0.00615222
gene7780	0.00825224	0.00115271
gene3501	0.00824512	-0.0033683
gene4205	0.00824439	0.0250367
gene5075	0.0082427	-0.0065637
gene11468	0.00824253	-0.00248929
gene3039	0.00823298	-2.08197e-06
gene5628	0.00822339	-0.00319656
gene3332	0.00822123	-0.000302403
gene10531	0.0082172	-0.000608353
gene4985	0.00819941	-0.0222969
gene5783	0.00819731	-0.0107061
gene3470	0.00819271	-0.00285007
gene9252	0.00819015	0.00272269
gene4145	0.00819012	0.0291298
gene8472	0.00818944	0.00228098
gene4475	0.00818905	-0.00255016
gene1449	0.00818476	-0.00475985
gene6871	0.00818302	-0.0102804
gene1306	0.00818279	-0.00133762
gene5331	0.00816659	-0.00187758
gene1807	0.0081584	-0.00143065
gene166	0.00815509	-0.00313981
gene7065	0.00815478	-0.00276359
gene4403	0.00814062	-0.00955569
gene4569	0.00813592	-0.00331121
gene1411	0.0081264	-0.00152325
gene5389	0.00812449	-0.00536544
gene12304	0.0081125	-0.00398381
gene10342	0.0081049	-0.00340008
gene4392	0.0081038	-0.00337778
gene2316	0.00809013	-0.00539226
gene8025	0.00806919	0.000698563
gene290	0.00806597	-0.0100276
gene10785	0.0080656	-0.00848984
gene7687	0.00806335	0.00470393
gene4681	0.00806095	-0.00398843
gene10878	0.00806001	0.00774272
gene3441	0.00805726	-0.00501164
gene2620	0.00805306	-0.00779217
gene8600	0.00804406	0.0131619
gene11968	0.00803798	-0.0176255
gene5017	0.00802926	-0.00380482
gene11778	0.00802561	-0.00438053
gene8844	0.00801724	-0.00453358
gene8424	0.00801298	-0.00188402
gene11218	0.00800506	0.0132034
gene2061	0.00800486	0.00131252
gene3805	0.00800357	-0.00271009
gene6872	0.00799748	0.00187957
gene3851	0.00799103	-0.00344403
gene53	0.00798965	-0.00286301
gene743	0.00797923	0.00566762
gene7853	0.00796451	-0.00302739
gene10721	0.00795748	-0.00025588
gene1995	0.00795226	0.00116746
gene8286	0.00794789	0.00901946
gene10157	0.00794627	-0.00295851
gene5928	0.00794215	0.00149832
gene3338	0.00793097	-0.00091817
gene5261	0.00791599	-0.0095577
gene265	0.00791522	-0.000459945
gene5913	0.00791442	0.000837552
gene8977	0.00791098	0.00739461
gene4140	0.00789834	0.0137984
gene4235	0.00789421	0.00637568
gene1632	0.00789303	-0.00864788
gene4509	0.00788099	0.0177413
gene2577	0.0078692	-0.00144188
gene1118	0.00786909	-0.00188554
gene2929	0.00784306	0.00413194
gene7960	0.00784005	0.0127146
gene8707	0.00782562	-0.00548915
gene10120	0.00782506	-0.013612
gene10384	0.00782227	0.0108299
gene11948	0.00781644	-0.00442842
gene4701	0.00781518	-0.000738881
gene2319	0.00780836	0.00205821
gene3900	0.00780598	-0.00147604
gene8318	0.0077915	0.00203752
gene1308	0.00779106	0.00186689
gene2391	0.00778438	0.0112381
gene3417	0.00778277	0.00332472
gene10226	0.00777853	-0.00445042
gene9718	0.00776972	-0.0234901
gene8537	0.0077583	-0.00561115
gene4892	0.00775567	0.0150707
gene3356	0.00775419	0.00167147
gene10781	0.00775255	0.00180712
gene9382	0.00775155	-0.000434255
gene1582	0.00775046	-0.00396541
gene5575	0.00774787	-0.0106397
gene8866	0.00774395	-0.00122625
gene2928	0.00774294	0.00258274
gene1365	0.00773505	-0.00216661
gene3562	0.00773411	0.00966669
gene9141	0.00773409	0.00167477
gene6833	0.0077337	-0.00207454
gene10155	0.00773267	0.00820745
gene4629	0.00773	0.0163639
gene11313	0.00772179	0.00898721
gene12316	0.00771528	0.00443429
gene9477	0.00771278	-0.0130152
gene8869	0.0077085	-0.00200817
gene11726	0.00770101	-0.00648161
gene255	0.0077005	-0.000937331
gene6797	0.00769577	-0.00695284
gene9865	0.00768859	-0.00289294
gene12063	0.00768636	-0.00128747
gene8500	0.00767358	-0.0163793
gene5448	0.00766552	-0.0035866
gene8688	0.00765721	-0.00242454
gene8887	0.00765585	-0.0010087
gene4858	0.00765327	-0.0052453
gene4656	0.00764999	-0.00257679
gene564	0.00764597	-0.00434155
gene6325	0.00762061	-0.00219113
gene10876	0.00761571	0.00366325
gene9194	0.0076135	-0.00940897
gene996	0.00761203	-0.00444583
gene3127	0.00761137	-0.00281049
gene6690	0.00760858	-0.0031328
gene2365	0.00760733	0.000673354
gene11764	0.0076071	0.00377315
gene7536	0.00760141	0.0182913
gene11737	0.00759873	0.00237254
gene6356	0.00758842	-0.00978016
gene2570	0.00758475	0.0079725
gene4371	0.00757806	-0.00138794
gene3231	0.00757582	-0.00443905
gene4292	0.00757533	-0.00307101
gene1679	0.00757073	0.00372942
gene2421	0.00756935	-0.00647608
gene11893	0.00756803	0.00520234
gene12057	0.00756524	0.0221019
gene1706	0.00755854	-0.00799017
gene2279	0.00755771	1.77836e-05
gene1722	0.00755668	-0.00534059
gene4811	0.00755615	-0.0046956
gene7232	0.00755236	0.000504914
gene9567	0.00754994	0.00271054
gene4536	0.00753739	0.00540895
gene2605	0.007535	-0.0110709
gene5158	0.00753489	0.00108528
gene10574	0.00753258	-0.00165633
gene6939	0.0075323	-0.0181406
gene1452	0.00752884	0.000790046
gene1834	0.0075262	-0.00801843
gene3644	0.00752472	-0.00463697
gene11190	0.00752361	-0.0104784
gene8323	0.00752283	0.00228532
gene9985	0.00751973	0.00499346
gene7430	0.00751861	0.0180626
gene10564	0.00750956	-0.0141407
gene5524	0.00750728	0.0163796
gene10907	0.00750079	0.0134779
gene686	0.00749758	0.00553817
gene3978	0.00748996	-0.00644352
gene12204	0.00748541	-0.00709002
gene1121	0.00748514	-0.00360791
gene8115	0.00747421	-0.00416297
gene10095	0.00747415	0.00120875
gene11533	0.00747399	-0.00315219
gene11216	0.00746275	0.00131199
gene5508	0.00746218	0.00295053
gene6561	0.0074605	0.0321224
gene2779	0.0074593	0.00121597
gene3992	0.00744681	0.00397852
gene7203	0.00744542	-0.000636708
gene11775	0.00744514	-0.0068839
gene8634	0.00744139	-0.00562739
gene2282	0.00744082	-0.00763178
gene5129	0.00743796	0.0151596
gene11002	0.00743766	0.0347759
gene7033	0.00743673	0.00116507
gene8416	0.00743399	-0.00203746
gene8627	0.0074334	0.0251322
gene3708	0.00743218	-0.00286976
gene5693	0.00743068	-0.0211308
gene6270	0.00742998	0.00253643
gene3203	0.00742813	-0.000531076
gene4192	0.00742189	-0.00593123
gene2961	0.00741675	0.00542356
gene9251	0.00741455	-0.00835456
gene7948	0.0074121	-0.00397431
gene6437	0.00740252	0.000822466
gene2626	0.00739504	0.0213029
gene10193	0.00739348	0.0118705
gene6552	0.00737547	-0.00213438
gene11016	0.00737282	-0.00355611
gene2920	0.00736442	0.00130319
gene11138	0.00736389	-0.00624323
gene5752	0.00736082	0.00614284
gene10529	0.00735818	0.00236424
gene4437	0.00735504	0.000428591
gene6350	0.00735439	-0.0049058
gene11768	0.00734723	0.0186927
gene7154	0.00734692	-0.00416346
gene3633	0.00734607	-0.00418324
gene9814	0.00734126	-0.00308651
gene5770	0.00733663	0.0123869
gene402	0.00733179	-0.00339032
gene5900	0.00732817	-0.00615484
gene5879	0.00732747	0.00542659
gene1701	0.00731238	-0.00330145
gene2350	0.00730502	0.00068455
gene569	0.00730422	0.000985487
gene631	0.00730133	-0.00090495
gene9816	0.00730029	-0.025439
gene6423	0.00729708	-0.00295929
gene2534	0.00728887	-0.00410998
gene5699	0.00728882	0.0029315
gene11496	0.00728699	-0.0182597
gene8096	0.00728031	0.00486985
gene11529	0.00727894	-0.000502225
gene1947	0.00727114	-0.00472392
gene6951	0.00727088	0.000236689
gene5571	0.00726848	0.000239951
gene3489	0.0072668	-0.00277299
gene11564	0.00726518	0.0241654
gene10490	0.00725192	-0.0125862
gene10751	0.00724927	0.0191188
gene5481	0.00724286	-0.000846246
gene3345	0.00723909	-0.0107708
gene11352	0.00723728	0.009964
gene3745	0.00722686	-0.02587
gene9148	0.00720963	0.00432672
gene2612	0.0072049	-0.00063923
gene1100	0.00720382	0.00258658
gene4930	0.00718836	-0.00526598
gene9198	0.00718456	-0.00056793
gene310	0.00718067	0.000306964
gene8169	0.00717589	-0.00306447
gene7202	0.00717097	-0.00913534
gene1663	0.00716968	0.00387038
gene10629	0.00716703	-0.00481127
gene9611	0.00716545	-0.00391709
gene2353	0.00716348	-0.00191419
gene7406	0.00715182	-0.0162387
gene3719	0.00713478	-0.00779517
gene2937	0.00713023	-0.001409
gene4558	0.00711682	0.0409895
gene4246	0.00710746	0.0216051
gene9274	0.00710709	-0.0105349
gene4895	0.00710056	0.00885456
gene9316	0.00709517	-0.00112281
gene942	0.00708973	-0.000559705
gene5540	0.00708216	0.0144651
gene1781	0.00708055	0.000717617
gene8179	0.00707866	0.0005526
gene3934	0.00707567	0.00012793
gene1444	0.0070753	-0.00722332
gene12205	0.0070733	0.00248382
gene6061	0.0070714	0.025201
gene7124	0.00707	-0.017792
gene961	0.00706855	0.00892241
gene8060	0.00706727	-0.00167153
gene10168	0.00705016	0.0138434
gene267	0.00704849	0.00516815
gene10851	0.0070472	-0.00133195
gene5043	0.00704207	-0.00130046
gene889	0.00704107	-0.00902457
gene6927	0.00703973	-0.0193301
gene2496	0.00703516	0.00174504
gene5458	0.00703409	-0.000183381
gene11015	0.00702554	0.00129193
gene6712	0.00701777	-0.0141657
gene1791	0.00701359	-0.00245006
gene151	0.00701165	-0.00062393
gene8470	0.00701099	-0.00186099
gene2204	0.00701082	0.00782619
gene9313	0.00700642	0.0016613
gene11651	0.00700046	-0.00454581
gene6230	0.00699371	-0.0011132
gene1550	0.00699108	0.00254715
gene3896	0.00697134	-0.0043443
gene899	0.00696703	-0.0038759
gene7158	0.0069614	-0.00090329
gene6226	0.00695391	-0.00726198
gene9800	0.00695313	0.0162944
gene9954	0.00694254	-0.0134222
gene2931	0.00694251	0.012332
gene930	0.00694097	-0.00179066
gene3312	0.00692392	-0.00225046
gene5323	0.00692021	0.00159383
gene1776	0.00691918	0.00532336
gene11391	0.00691834	-0.0125794
gene8690	0.00691497	-0.0104782
gene6742	0.00691241	-9.76335e-05
gene6216	0.00690865	0.0109412
gene12248	0.00690802	0.00112287
gene8361	0.00690714	0.0146309
gene10815	0.00690234	-0.00566694
gene726	0.00690074	-0.00557718
gene1623	0.00690053	0.00107722
gene5079	0.00690002	0.00052506
gene3842	0.00689859	-0.00572485
gene8482	0.00689757	-0.00420859
gene11173	0.00689678	-0.00336826
gene10589	0.00688755	0.0055228
gene8363	0.0068843	-0.00348095
gene3628	0.00687925	0.00108117
gene6662	0.00687548	-0.00681216
gene8591	0.00687392	0.0066227
gene10813	0.0068687	0.00309702
gene3475	0.00685898	0.000387609
gene11817	0.0068571	0.00338478
gene9146	0.00685481	-0.00283337
gene8231	0.00684839	-0.00497843
gene2394	0.00684588	0.0142979
gene2828	0.00683948	-0.00125567
gene9884	0.00683532	0.00249712
gene3669	0.00683216	0.00196289
gene4456	0.00682079	-0.00895541
gene5779	0.00682052	-0.00252589
gene605	0.00681702	0.0161791
gene6475	0.00681563	-0.00106673
gene488	0.0068002	0.0395804
gene4151	0.00679946	0.0136841
gene3675	0.00679796	-0.00234583
gene3315	0.00679522	-0.0101203
gene2146	0.00679419	0.00558877
gene12335	0.00679158	-0.0064392
gene9684	0.00678857	-0.00686963
gene526	0.00678479	-0.00187437
gene388	0.00678408	-0.00375761
gene7787	0.00678276	0.00150277
gene3412	0.00678246	-0.000110998
gene5334	0.00676919	-0.00479369
gene9238	0.00676689	-0.00518263
gene487	0.00675957	0.0102893
gene11065	0.0067595	-0.00499001
gene9831	0.00674999	-0.000220943
gene8709	0.00673986	-0.00163224
gene5856	0.00673951	-0.00137861
gene5962	0.0067392	-0.0161881
gene2800	0.00673838	0.00366958
gene8806	0.00673752	0.000210532
gene5531	0.00673027	-0.00135908
gene3940	0.0067294	-0.00451027
gene2210	0.00671897	0.0323208
gene2582	0.00671582	-0.0107156
gene11151	0.00671003	0.000999472
gene304	0.00670496	0.00483974
gene4318	0.0067025	-0.000737253
gene2315	0.00669215	-0.000900732
gene10597	0.00669038	-0.00510597
gene2364	0.00669008	-0.00289524
gene3847	0.00667059	-0.0112922
gene5576	0.00666906	0.00249981
gene6817	0.00666778	-0.000109028
gene7956	0.00666393	0.00268715
gene7050	0.00666337	0.00146887
gene2607	0.00665494	0.00725008
gene8082	0.00665484	-0.00845823
gene9785	0.00665196	-0.00654372
gene9824	0.00664968	-0.00373482
gene1608	0.00664848	-0.00131175
gene7107	0.00664449	-0.011628
gene9834	0.00664269	-0.00441285
gene6417	0.00663914	0.000439272
gene278	0.00663673	-0.00132283
gene9827	0.00663375	0.000939049
gene4555	0.00663232	-0.00191539
gene9813	0.00662963	-0.000750138
gene7373	0.00662842	0.022715
gene6376	0.00662836	0.00806721
gene8219	0.00661813	-0.00279319
gene5938	0.0066165	-0.0256903
gene2290	0.00661535	-0.00395896
gene199	0.00661021	-0.00164808
gene7659	0.00659804	0.00912935
gene2288	0.00659081	0.00421984
gene6391	0.00658926	-0.007928
gene3857	0.00658798	-0.0124089
gene2996	0.00658025	-0.0016465
gene2897	0.00657861	0.00908825
gene8699	0.0065783	0.0229617
gene2948	0.00657779	0.000506751
gene6906	0.00657639	-0.00239841
gene3989	0.00657411	-0.0060011
gene524	0.00657363	-0.0181771
gene510	0.00657111	0.000292147
gene172	0.00656557	-0.00225136
gene2437	0.00656471	0.00573734
gene11621	0.00656127	0.0335924
gene2638	0.00655813	-0.00766365
gene3924	0.00655507	-0.00236904
gene9627	0.00655093	-0.0019384
gene9441	0.00654953	-0.0069439
gene1990	0.00654728	0.000381464
gene3204	0.00654655	0.0221289
gene4305	0.00654083	-0.00510394
gene1104	0.00653973	0.0429982
gene10003	0.00653683	-0.00127414
gene12131	0.00653606	0.000169161
gene1996	0.00653309	0.00299067
gene5324	0.00652221	-0.00432964
gene6047	0.00652098	-0.00809646
gene7082	0.0065206	0.00248024
gene4293	0.00651965	-0.00140051
gene7900	0.00651797	-0.00441443
gene3645	0.00651787	0.0412732
gene244	0.00651725	0.000122241
gene4402	0.00651481	0.000796152
gene10727	0.0065127	-0.000814472
gene4100	0.00651183	0.00522094
gene1009	0.00651115	0.00204477
gene10840	0.00650933	0.00997156
gene5104	0.00650505	0.00153384
gene3936	0.00649965	0.00180874
gene4413	0.00649828	-0.003502
gene5818	0.00649676	0.018442
gene5921	0.00649542	-0.000506308
gene5638	0.00649351	-0.00227477
gene8593	0.00648745	0.00798863
gene10619	0.00648727	0.000114709
gene3787	0.00648427	-0.00279494
gene9299	0.00647941	-0.000260664
gene8592	0.00647923	-0.00110992
gene10898	0.00647045	-0.00544899
gene533	0.00646942	-0.00379592
gene11318	0.00646615	0.00322769
gene8485	0.0064652	-0.00535579
gene2614	0.00646437	-0.0126935
gene6234	0.00646211	0.00470193
gene2790	0.00645954	-0.00456269
gene1587	0.00645669	0.00236335
gene11039	0.00645203	0.00277416
gene3660	0.00645199	-0.00432562
gene5715	0.00644817	0.0157825
gene5988	0.00644784	-0.00312203
gene10144	0.00644376	0.00203447
gene4717	0.0064406	0.00152795
gene4399	0.00643651	0.00458448
gene1258	0.00643569	-0.000316742
gene1584	0.00643528	-0.000507828
gene7584	0.00642643	0.0183664
gene11802	0.0064206	-0.0202865
gene2426	0.00641809	-0.0026931
gene5232	0.00641148	-0.0138611
gene1652	0.00640937	-0.00676394
gene3724	0.00640581	-0.00353389
gene4887	0.00640194	0.0123372
gene8952	0.00640069	-0.0023969
gene8867	0.00640062	-0.00222061
gene8889	0.00639827	9.57361e-05
gene5536	0.00639428	-0.00503274
gene4359	0.0063935	-0.00193452
gene1655	0.00638555	-0.0060943
gene2613	0.0063752	-0.0124957
gene6471	0.00637088	0.0239486
gene2475	0.00636527	-0.00913586
gene888	0.006363	-0.00305382
gene500	0.00635937	0.00230377
gene7085	0.00635917	0.010279
gene7459	0.0063537	-0.00450693
gene6991	0.00635075	-0.00157075
gene3136	0.00634941	0.0035313
gene5313	0.00634842	-0.000898788
gene11837	0.00634093	-0.00233959
gene3826	0.00633995	-0.00793878
gene3342	0.00633562	-0.0102601
gene2127	0.00632938	0.00180797
gene2429	0.00632853	0.00556611
gene4608	0.00632816	-0.00524482
gene7421	0.00632412	0.00219144
gene9702	0.00632375	0.00236784
gene12167	0.0063228	-0.00373421
gene3354	0.0063185	0.00660853
gene6853	0.00631562	-0.00594471
gene8322	0.00631511	0.00434501
gene7251	0.00631072	-0.00592691
gene11700	0.00630367	-0.00164332
gene11680	0.00629829	-0.000108287
gene8579	0.0062977	0.000652633
gene6557	0.00629349	0.015059
gene2818	0.00627362	-0.00615745
gene6159	0.00627076	-0.000210547
gene7448	0.00626995	-0.0052954
gene11824	0.00626781	-0.00452364
gene652	0.00626529	-0.00334922
gene10314	0.00625805	0.00162651
gene5411	0.00625547	-0.00220626
gene11818	0.00625404	0.00187581
gene7273	0.00625181	0.012197
gene3844	0.00624667	-0.00137543
gene11697	0.00624552	-0.00627155
gene8756	0.00624292	-0.00783515
gene3868	0.00624175	-0.00131288
gene2418	0.00623863	-0.0034926
gene5048	0.00623668	0.00484612
gene4022	0.0062333	-0.00334479
gene2180	0.00622702	0.000104384
gene10377	0.00622498	-0.00603715
gene1844	0.00622358	-0.00117726
gene3225	0.00622351	-0.00121146
gene1961	0.00622292	-0.00802478
gene3210	0.00621547	-0.00270544
gene8180	0.0062128	-0.000697741
gene3982	0.00620384	0.00182601
gene1197	0.00620361	-0.00291992
gene2395	0.00620203	0.0147752
gene7422	0.00620111	0.00194563
gene554	0.00619806	-0.00105419
gene5694	0.00618813	0.0104403
gene12118	0.00618689	-0.00283423
gene7953	0.00618318	-0.00318966
gene2763	0.00616859	0.0100014
gene5339	0.00616644	-0.0075833
gene9844	0.00616581	-0.0163171
gene9260	0.00615588	0.00193835
gene2428	0.00615066	0.00372985
gene4606	0.00614668	-0.0115474
gene6838	0.00614504	-0.00386095
gene5018	0.00614402	-0.00133925
gene7957	0.0061436	-0.004369
gene11464	0.00613842	0.00392626
gene7465	0.00613723	0.00327337
gene6705	0.00613598	-0.0015868
gene7089	0.0061354	0.00226544
gene1693	0.00613452	-0.0041682
gene8106	0.00613421	-0.0127704
gene4761	0.00613397	0.00493276
gene8938	0.00613105	0.00506216
gene2890	0.00613073	-0.00573498
gene10911	0.00612442	-0.0053121
gene3699	0.00612029	-0.000766789
gene2795	0.00610472	0.00196195
gene10826	0.00610429	0.00186547
gene6729	0.0061039	0.0193073
gene9659	0.0060975	-0.00859119
gene6933	0.00609625	-0.00182838
gene9355	0.00609213	0.0015692
gene10206	0.0060915	-0.00334591
gene7807	0.0060882	0.000281388
gene84	0.00608737	-0.00145815
gene10477	0.00608536	0.00996642
gene3165	0.00606491	-0.00837955
gene7473	0.00606471	0.00108331
gene446	0.00606446	-0.00783009
gene4183	0.0060624	-0.00176225
gene10125	0.00606145	-0.0037617
gene819	0.0060609	-0.00348433
gene9334	0.00605971	-0.00115327
gene1206	0.00605872	0.0184063
gene3007	0.00605806	0.00507388
gene11037	0.00605325	-0.000362797
gene12121	0.00605236	-0.0175876
gene5832	0.00605106	-0.000752339
gene450	0.0060503	-0.000464824
gene2355	0.00604688	0.00721314
gene11847	0.00604163	0.00524733
gene11827	0.00604037	-0.00360713
gene7512	0.00603833	-0.0016219
gene3713	0.00603616	0.00476775
gene6284	0.00603442	-0.0178964
gene695	0.00603206	0.00167381
gene10	0.00603196	0.000679202
gene4024	0.00603178	0.0036161
gene11479	0.00603028	-0.00848239
gene1653	0.00602823	-0.00243449
gene269	0.00602436	0.00658776
gene2917	0.00602329	-0.00516695
gene6760	0.0060232	0.00112353
gene3791	0.00601914	-0.000424404
gene10542	0.00601905	-0.00353678
gene2501	0.00601791	0.00349695
gene5287	0.00601619	-0.00737663
gene1427	0.00601281	-0.000387756
gene9384	0.00601029	-0.0034627
gene140	0.00600973	0.00421856
gene8784	0.00600358	0.00199612
gene1714	0.00600271	-0.000457711
gene1953	0.00599899	-0.0156188
gene7859	0.00599273	0.00135389
gene6338	0.00599231	-0.00243262
gene6053	0.00599126	-0.00311445
gene8053	0.00598661	0.00231964
gene3578	0.00598495	0.0123929
gene6241	0.00598347	0.013367
gene1588	0.00597997	-0.00170931
gene5387	0.00597803	-0.00435279
gene1174	0.00597567	-0.00258932
gene2732	0.00597436	-0.00271169
gene794	0.00596568	-0.00936973
gene10403	0.00595839	0.00459978
gene9717	0.00595506	-0.00552365
gene3147	0.00595021	0.00342739
gene3236	0.00594599	0.00125894
gene3946	0.00594595	-0.0102463
gene1135	0.00594271	0.000164889
gene4197	0.00593992	-0.000301001
gene9835	0.00593932	0.00248223
gene9578	0.00593647	-0.0059795
gene7048	0.0059336	0.00175456
gene8015	0.00593191	0.000140523
gene249	0.0059282	0.00455248
gene7064	0.00591985	-0.0101046
gene4778	0.00591649	0.000967406
gene1959	0.00591162	-0.00840727
gene6524	0.00590883	0.00426917
gene4060	0.0059018	-0.00750695
gene8245	0.00590072	0.00302242
gene9907	0.00588442	0.00320164
gene7945	0.00588307	-0.00595002
gene8605	0.00588291	0.00661659
gene1669	0.00588111	0.0229007
gene8098	0.00587977	0.000831717
gene9774	0.00587184	0.0252244
gene9896	0.0058714	0.00183447
gene8010	0.00586516	0.00683779
gene2014	0.00586339	-0.00153087
gene11845	0.00585968	-0.00503239
gene6759	0.00585738	-0.0037099
gene8891	0.00585733	0.0013062
gene6519	0.00585487	-0.00100961
gene12064	0.00585305	0.0028092
gene2701	0.00585144	-0.0018354
gene4665	0.00585069	0.000870025
gene103	0.00584929	0.00955203
gene2858	0.00584828	-0.000754991
gene815	0.00584793	0.0163802
gene9862	0.00583935	-0.00134539
gene12132	0.00583926	0.00558294
gene8160	0.00583884	0.000240592
gene12047	0.00583773	-0.000616623
gene948	0.00583551	0.00361655
gene6637	0.00583418	0.0133732
gene2310	0.00582604	-0.00281722
gene6531	0.00581611	-0.000793807
gene4076	0.00581585	0.00134504
gene2308	0.00581285	-0.00456677
gene129	0.00580937	0.000469393
gene3197	0.00580861	0.00228639
gene11368	0.00580763	-0.00200827
gene2554	0.00580521	0.00419131
gene9312	0.00580367	-0.000221015
gene9161	0.00580245	0.00871826
gene3809	0.00579394	0.000551844
gene10030	0.00579044	-0.00823732
gene629	0.00579001	0.000837175
gene6706	0.0057889	-0.00400275
gene6836	0.00578832	0.0122678
gene2111	0.0057871	0.0126669
gene11954	0.00578365	-0.00054741
gene8905	0.00578072	-0.00146594
gene6881	0.00577874	0.00185337
gene4343	0.00577131	0.0165109
gene12022	0.00576161	0.0016028
gene8980	0.00575806	0.00740046
gene11539	0.0057537	0.00562201
gene1984	0.00574981	-0.00305043
gene5462	0.00574742	0.00188907
gene4105	0.00574372	0.0143325
gene5176	0.00574089	0.0241559
gene8135	0.00573275	-0.0041742
gene8989	0.00573138	-0.00304302
gene2817	0.00572642	-0.00473139
gene6765	0.00572481	0.000249514
gene4002	0.00572363	0.00124869
gene1905	0.0057235	0.00244059
gene5247	0.00571934	-0.00133512
gene1694	0.00571748	-0.00425063
gene1381	0.00571622	-0.0137644
gene2393	0.00571607	0.0229566
gene6340	0.00570541	-0.0146028
gene11442	0.00568998	0.033641
gene2757	0.00568993	0.0120203
gene8685	0.00568021	-0.0122627
gene2618	0.00567935	-0.000802958
gene3326	0.00567738	0.0011317
gene1234	0.00567434	-0.000464822
gene1523	0.005673	0.00581628
gene5139	0.00567235	-0.00609
gene990	0.00567014	-0.00496471
gene16	0.00566824	-0.00388739
gene7695	0.00565417	0.00409922
gene9516	0.00565403	0.020434
gene724	0.00565357	0.000448114
gene658	0.00564726	0.0037339
gene2919	0.00564613	0.00034643
gene9431	0.00564588	0.00585566
gene2122	0.00564402	0.00246329
gene7361	0.00564176	-0.00344061
gene6652	0.00564139	-0.000918318
gene9909	0.0056359	0.00120085
gene1839	0.00563313	0.000619702
gene11629	0.00562809	0.000331163
gene7416	0.00562411	-0.0118293
gene2646	0.00561692	0.00406768
gene6261	0.0056128	0.00760769
gene296	0.00560965	0.00306959
gene8724	0.00560358	-0.00552521
gene1431	0.0056034	-0.00694396
gene6451	0.00560282	-0.00173664
gene5249	0.00560037	0.0183495
gene7443	0.00559198	0.0110257
gene12211	0.00558916	0.00189757
gene4991	0.00558556	-0.00446844
gene4083	0.00558177	-0.000270504
gene9631	0.0055789	-0.0134594
gene12155	0.00557778	-0.00434842
gene9324	0.00557696	0.00226217
gene6903	0.00557683	0.00949868
gene5791	0.0055565	-0.00501819
gene6883	0.00555528	0.00959597
gene728	0.00555103	-0.00019521
gene2095	0.00554999	0.0114129
gene2839	0.00554959	0.0147496
gene3626	0.00554922	0.00760589
gene592	0.00554806	-0.00381576
gene11843	0.00554609	0.00230131
gene1758	0.00554592	0.00131533
gene3159	0.00554534	-0.0149969
gene5893	0.00554367	-0.00442786
gene5190	0.00553722	0.00258507
gene9375	0.00553464	0.00222416
gene10799	0.00552159	0.00522622
gene5032	0.00551857	-0.0166045
gene780	0.00551444	-0.00132244
gene11675	0.00551425	-0.00433071
gene5400	0.00550457	0.00677001
gene11214	0.005502	-0.00466148
gene4376	0.00550188	-0.00865299
gene1344	0.00549995	0.00820665
gene11839	0.00549915	-0.00107974
gene7146	0.00549827	-0.0161364
gene10311	0.00549568	0.00745957
gene1081	0.00549106	0.00560165
gene12210	0.00549052	0.00310065
gene9112	0.00548494	0.00703063
gene5729	0.00548287	0.00012985
gene4479	0.00548223	-0.00722248
gene11171	0.00548155	-0.00458599
gene7176	0.00547927	0.00156942
gene396	0.00547634	0.0059022
gene11290	0.00546587	-0.00367041
gene9553	0.00546272	0.011664
gene4538	0.00545637	0.00961741
gene4166	0.00545484	0.00169503
gene7538	0.00545233	-0.00230249
gene11607	0.00545071	-0.000512276
gene3718	0.00544574	0.017964
gene2738	0.00544405	0.00427493
gene10264	0.00544243	0.00769019
gene5757	0.00544087	0.039162
gene6037	0.00544011	0.00483636
gene9389	0.00543124	-0.00369871
gene2625	0.00543109	0.045172
gene10716	0.00542981	-0.00435427
[truncated: 7,760 more rows]
