# Supplementary material for: Individual differences in honey bee behavior enabled by plasticity in brain gene regulatory networks
Source: bioRxiv preprint, doi:10.1101/2020.09.09.289272, version 2 (2020-12-12)
Supplement: Supplemental File 6 [file 289272_file08.xlsx]

## Sheet: Sheet1
		PC2	PC3	PC4		PC2:	Top 5%	Bottom 5%	10% extreme		PC2, GO enrichment results						PC3:	Top 5%	Bottom 5%	10% extreme			PC3, GO enrichment results						PC4:	Top 5%	Bottom 5%	10% extreme		PC4, GO enrichment results
peak1	gene12372	0.00626348	-0.0288456	-0.00253071			peak8790	peak3829	peak8790									peak8790	peak5651	peak8790										peak875	peak2851	peak875
peak2	gene1	0.00911025	-0.00239156	-0.00704234			peak7078	peak11232	peak7078		Top 5%							peak7078	peak6434	peak7078			Top 5%							peak881	peak7749	peak881
peak3	gene0	0.00229634	-0.00177201	0.00249138			peak9372	peak11262	peak9372		GO term	Description	P-value	FDR q-value	Enrichment (N, B, n, b)			peak1448	peak9641	peak1448			GO term	Description	P-value	FDR q-value	Enrichment (N, B, n, b)			peak880	peak2974	peak880		Top 5%
peak4	gene4	0.00477957	0.000949354	-0.0032999			peak1448	peak3729	peak1448		GO:0061077	chaperone-mediated protein folding	0.000131	0.782	5.00 (3050,12,356,7)			peak9372	peak8080	peak9372			GO:0007411	axon guidance	3.2e-08	0.000191	2.69 (3050,150,257,34)			peak882	peak8936	peak882		GO term	Description	P-value	FDR q-value	Enrichment (N, B, n, b)
peak5	gene4	0.00802553	0.00254084	0.00395352			peak10749	peak3550	peak10749		GO:0006555	methionine metabolic process	0.000363	1	6.12 (3050,7,356,5)			peak10749	peak4718	peak10749			GO:0097485	neuron projection guidance	9.07e-08	0.000271	2.59 (3050,156,257,34)			peak11612	peak10433	peak11612		GO:0050808	synapse organization	6.69e-06	0.0399	3.35 (3050,92,168,17)
peak6	gene8	0.0104343	-0.00676922	-0.00299918			peak6711	peak2143	peak6711									peak6711	peak4060	peak6711			GO:0032502	developmental process	1.24e-06	0.00246	1.46 (3050,897,257,110)			peak4690	peak7450	peak4690		GO:0007523	larval visceral muscle development	4.26e-05	0.127	14.52 (3050,5,168,4)
peak7	gene8	0.000620557	0.00556506	-0.000441103			peak6712	peak2343	peak6712									peak8837	peak400	peak8837			GO:0006928	movement of cell or subcellular component	1.59e-06	0.00237	1.91 (3050,317,257,51)			peak9674	peak8872	peak9674		GO:0007631	feeding behavior	0.000129	0.257	6.81 (3050,16,168,6)
peak8	gene8	0.00460362	0.00551688	-0.0193245			peak9963	peak11234	peak9963		Bottom 5%							peak6712	peak4118	peak6712			GO:0007155	cell adhesion	2.29e-06	0.00273	3.12 (3050,76,257,20)			peak9679	peak10592	peak9679		GO:0030534	adult behavior	0.000196	0.293	3.11 (3050,76,168,13)
peak9	gene8	-0.0017168	0.00368301	-0.0028485			peak9260	peak8178	peak9260									peak10753	peak1045	peak10753			GO:0022610	biological adhesion	2.86e-06	0.00285	3.08 (3050,77,257,20)			peak9673	peak11274	peak9673		GO:0007522	visceral muscle development	0.000522	0.624	9.08 (3050,8,168,4)
peak10	gene8	-0.000184555	-0.00533187	-0.00231521			peak11077	peak4931	peak11077		GO term	Description	P-value	FDR q-value	Enrichment (N, B, n, b)			peak11612	peak11299	peak11612			GO:0009653	anatomical structure morphogenesis	2.9e-06	0.00247	1.74 (3050,424,257,62)			peak11086	peak3486	peak11086		GO:0007166	cell surface receptor signaling pathway	0.000645	0.642	2.17 (3050,167,168,20)
peak11	gene8	0.00421511	0.00455281	0.0133282			peak8720	peak10343	peak8720		GO:0098742	cell-cell adhesion via plasma-membrane adhesion molecules	6.77e-07	0.00404	5.34 (3050,32,214,12)			peak9271	peak9160	peak9271			GO:0050794	regulation of cellular process	6.16e-06	0.0046	1.29 (3050,1389,257,151)			peak9966	peak4048	peak9966
peak12	gene8	0.00482419	-0.003366	0.0106378			peak11612	peak11521	peak11612		GO:0098609	cell-cell adhesion	1.09e-06	0.00326	4.43 (3050,45,214,14)			peak1378	peak11262	peak1378			GO:0098609	cell-cell adhesion	9.86e-06	0.00654	3.69 (3050,45,257,14)			peak9967	peak10553	peak9967
peak13	gene10	-0.000475906	-0.00249395	0.0101757			peak7946	peak2010	peak7946		GO:0007155	cell adhesion	1.19e-05	0.0237	3.19 (3050,76,214,17)			peak7684	peak7433	peak7684			GO:0032501	multicellular organismal process	1.92e-05	0.0114	1.51 (3050,627,257,80)			peak9964	peak3732	peak9964		Bottom 5%
peak14	gene11	-0.00194377	-0.00181825	-0.00355487			peak10328	peak11408	peak10328		GO:0022610	biological adhesion	1.44e-05	0.0214	3.15 (3050,77,214,17)			peak8838	peak8420	peak8838			GO:0050789	regulation of biological process	2.05e-05	0.0111	1.25 (3050,1485,257,157)			peak2407	peak8661	peak2407
peak15	gene11	-0.000938413	0.00332136	-0.000816755			peak3318	peak7515	peak3318		GO:0007156	homophilic cell adhesion via plasma membrane adhesion molecules	2.65e-05	0.0316	5.13 (3050,25,214,9)			peak8842	peak9737	peak8842			GO:0048869	cellular developmental process	2.33e-05	0.0116	1.61 (3050,480,257,65)			peak11087	peak5584	peak11087		No GO Enrichment Found
peak16	gene18	-0.00093711	0.00414024	0.00179356			peak7187	peak8729	peak7187		GO:0040011	locomotion	2.92e-05	0.029	2.16 (3050,198,214,30)			peak11077	peak4140	peak11077			GO:0048864	stem cell development	3.07e-05	0.0141	6.39 (3050,13,257,7)			peak9678	peak5661	peak9678
peak17	gene18	-0.00243941	-0.00624934	0.00563338			peak8962	peak11081	peak8962		GO:0048731	system development	3.64e-05	0.0311	2.39 (3050,143,214,24)			peak6709	peak3913	peak6709			GO:0048731	system development	3.66e-05	0.0156	2.24 (3050,143,257,27)			peak4687	peak6827	peak4687
peak18	gene18	0.00154256	0.000227232	0.00676482			peak7189	peak10006	peak7189		GO:0007166	cell surface receptor signaling pathway	6.52e-05	0.0487	2.22 (3050,167,214,26)			peak2126	peak1522	peak2126			GO:0008045	motor neuron axon guidance	3.84e-05	0.0153	3.51 (3050,44,257,13)			peak1506	peak5868	peak1506		10% extreme
peak19	gene18	-0.00390694	0.00184118	-0.00352596			peak5893	peak11425	peak5893		GO:0007423	sensory organ development	7.83e-05	0.0519	2.52 (3050,113,214,20)			peak8833	peak4593	peak8833			GO:0009886	post-embryonic animal morphogenesis	4.37e-05	0.0163	2.00 (3050,202,257,34)			peak1150	peak9995	peak1150
peak20	gene18	-0.00597468	-0.00240787	0.00127507			peak961	peak9542	peak961		GO:0007154	cell communication	9.07e-05	0.0542	2.27 (3050,151,214,24)			peak8969	peak7030	peak8969			GO:0010646	regulation of cell communication	9.56e-05	0.0336	1.59 (3050,432,257,58)			peak456	peak4092	peak456		GO term	Description	P-value	FDR q-value	Enrichment (N, B, n, b)
peak21	gene18	-0.00970542	-0.00341785	0.00225926			peak8900	peak4569	peak8900		GO:0010646	regulation of cell communication	0.000121	0.0657	1.65 (3050,432,214,50)			peak8840	peak2508	peak8840			GO:0023051	regulation of signaling	9.56e-05	0.0317	1.59 (3050,432,257,58)			peak3318	peak5034	peak3318		GO:0048168	regulation of neuronal synaptic plasticity	0.000243	1	4.24 (3050,10,503,7)
peak22	gene18	0.00163717	0.00456498	0.0011376			peak9712	peak11456	peak9712		GO:0023051	regulation of signaling	0.000121	0.0603	1.65 (3050,432,214,50)			peak9262	peak4980	peak9262			GO:0065007	biological regulation	9.67e-05	0.0304	1.21 (3050,1616,257,165)			peak9677	peak4170	peak9677		GO:0007631	feeding behavior	0.000323	0.965	3.41 (3050,16,503,9)
peak23	gene18	-0.00665578	-0.0032156	0.00290363			peak4576	peak6558	peak4576		GO:0009653	anatomical structure morphogenesis	0.00015	0.069	1.65 (3050,424,214,49)			peak10088	peak854	peak10088			GO:0048513	animal organ development	0.000123	0.0368	1.74 (3050,293,257,43)			peak9968	peak8078	peak9968
peak24	gene18	-0.00789688	-0.00317961	0.00368512			peak10889	peak4388	peak10889		GO:0045785	positive regulation of cell adhesion	0.000162	0.0691	7.92 (3050,9,214,5)			peak94	peak2384	peak94			GO:0048858	cell projection morphogenesis	0.00013	0.0369	2.42 (3050,98,257,20)			peak474	peak5523	peak474
peak25	gene18	-0.00336451	-0.00571249	0.00626525			peak4586	peak8964	peak4586		GO:0007169	transmembrane receptor protein tyrosine kinase signaling pathway	0.000175	0.0698	3.29 (3050,52,214,12)			peak6710	peak4653	peak6710			GO:0040011	locomotion	0.000168	0.0455	1.92 (3050,198,257,32)			peak7298	peak9757	peak7298
peak26	gene18	0.00194511	-0.00126235	0.00393942			peak5514	peak5212	peak5514		GO:0007167	enzyme linked receptor protein signaling pathway	0.000182	0.0681	2.81 (3050,76,214,15)			peak2675	peak884	peak2675			GO:0014019	neuroblast development	0.000202	0.0525	5.93 (3050,12,257,6)			peak9963	peak2427	peak9963
peak27	gene18	-0.00520268	0.000197248	0.00617454			peak1827	peak8833	peak1827		GO:0007267	cell-cell signaling	0.000275	0.0966	2.44 (3050,105,214,18)			peak9712	peak3503	peak9712			GO:0032990	cell part morphogenesis	0.000231	0.0574	2.33 (3050,102,257,20)			peak4118	peak8599	peak4118
peak28	gene18	0.00601097	-0.00139712	0.00868152			peak6710	peak11243	peak6710		GO:0032502	developmental process	0.000306	0.101	1.37 (3050,897,214,86)			peak1598	peak2189	peak1598			GO:0030154	cell differentiation	0.000239	0.0572	2.13 (3050,134,257,24)			peak5353	peak8006	peak5353
peak29	gene18	-0.0024701	0.00736087	0.0010685			peak6709	peak11214	peak6709		GO:0045465	R8 cell differentiation	0.000341	0.107	14.25 (3050,3,214,3)			peak6706	peak8143	peak6706			GO:0016203	muscle attachment	0.000259	0.0594	4.89 (3050,17,257,7)			peak3992	peak5613	peak3992
peak30	gene18	-0.00139388	-0.000407642	0.00578711			peak4711	peak1498	peak4711		GO:0016200	synaptic target attraction	0.000341	0.102	14.25 (3050,3,214,3)			peak10164	peak7874	peak10164			GO:0120039	plasma membrane bounded cell projection morphogenesis	0.000292	0.0647	2.35 (3050,96,257,19)			peak5352	peak7460	peak5352
peak31	gene18	0.00301126	0.000796534	0.00406817			peak9262	peak9929	peak9262		GO:0048522	positive regulation of cellular process	0.000393	0.112	1.47 (3050,622,214,64)			peak2281	peak8978	peak2281			GO:0048812	neuron projection morphogenesis	0.000292	0.0623	2.35 (3050,96,257,19)			peak8054	peak8130	peak8054
peak32	gene18	0.00239025	0.00657962	0.00771686			peak9502	peak4469	peak9502		GO:0001708	cell fate specification	0.000492	0.134	3.66 (3050,35,214,9)			peak7362	peak11392	peak7362			GO:0007476	imaginal disc-derived wing morphogenesis	0.000311	0.064	2.57 (3050,74,257,16)			peak4549	peak2412	peak4549
peak33	gene18	-0.00153981	0.00690791	-0.00375787			peak1617	peak11084	peak1617		GO:0048518	positive regulation of biological process	0.000527	0.137	1.42 (3050,691,214,69)			peak8839	peak8696	peak8839			GO:0045944	positive regulation of transcription by RNA polymerase II	0.000316	0.063	2.02 (3050,153,257,26)			peak885	peak8593	peak885
peak34	gene18	-0.00430678	-0.00138756	-0.0249228			peak1610	peak8079	peak1610		GO:0050794	regulation of cellular process	0.000532	0.132	1.24 (3050,1389,214,121)			peak9669	peak1127	peak9669			GO:0000122	negative regulation of transcription by RNA polymerase II	0.000562	0.108	2.30 (3050,93,257,18)			peak876	peak7010	peak876
peak35	gene18	0.0049792	0.00199165	-0.00346988			peak10927	peak11370	peak10927		GO:0023052	signaling	0.000558	0.133	2.31 (3050,111,214,18)			peak6137	peak10867	peak6137			GO:0120035	regulation of plasma membrane bounded cell projection organization	0.000583	0.109	2.43 (3050,78,257,16)			peak877	peak10062	peak877
peak36	gene26	0.0138318	0.000111133	-0.0103021			peak8838	peak5139	peak8838		GO:0009887	animal organ morphogenesis	0.000705	0.162	2.02 (3050,162,214,23)			peak10055	peak8085	peak10055			GO:0031344	regulation of cell projection organization	0.000583	0.105	2.43 (3050,78,257,16)			peak9676	peak2099	peak9676
peak37	gene27	-0.00549276	-0.00163664	-0.00166591			peak9038	peak8846	peak9038		GO:0048513	animal organ development	0.000862	0.191	1.70 (3050,293,214,35)			peak7189	peak1671	peak7189			GO:2000043	regulation of cardiac cell fate specification	0.000592	0.104	11.87 (3050,3,257,3)			peak1833	peak6706	peak1833
peak38	gene27	0.00358201	-0.00139463	0.0126857			peak8587	peak511	peak8587		GO:0022607	cellular component assembly	0.000869	0.185	1.66 (3050,327,214,38)			peak7441	peak5075	peak7441			GO:0042686	regulation of cardioblast cell fate specification	0.000592	0.101	11.87 (3050,3,257,3)			peak3236	peak295	peak3236
peak39	gene27	0.00098692	-0.00547625	0.0148562			peak6204	peak11605	peak6204		GO:0051124	synaptic growth at neuromuscular junction	0.000937	0.193	4.16 (3050,24,214,7)			peak4599	peak9140	peak4599			GO:0048518	positive regulation of biological process	0.000654	0.108	1.37 (3050,691,257,80)			peak9965	peak3454	peak9965
peak40	gene27	-0.018013	0.00688876	0.0150242			peak10688	peak8956	peak10688									peak2556	peak3289	peak2556			GO:0007399	nervous system development	0.000657	0.106	2.85 (3050,50,257,12)			peak1834	peak9260	peak1834
peak41	gene30	0.000557375	-0.000358584	0.0076865			peak6707	peak11588	peak6707									peak2279	peak8591	peak2279			GO:0006357	regulation of transcription by RNA polymerase II	0.000667	0.105	1.63 (3050,306,257,42)			peak1597	peak5646	peak1597
peak42	gene31	0.00157428	0.00302738	0.00908905			peak9278	peak6993	peak9278		10% extreme							peak5277	peak1270	peak5277			GO:0048856	anatomical structure development	0.000774	0.119	1.40 (3050,610,257,72)			peak9981	peak10558	peak9981
peak43	gene31	-0.002052	0.000585361	0.00242511			peak10055	peak3551	peak10055									peak6707	peak6934	peak6707			GO:0003008	system process	0.000777	0.116	1.81 (3050,197,257,30)			peak7468	peak4229	peak7468
peak44	gene31	-0.00852967	-0.00768251	0.00198518			peak1611	peak2253	peak1611		GO term	Description	P-value	FDR q-value	Enrichment (N, B, n, b)			peak2714	peak7110	peak2714			GO:0009887	animal organ morphogenesis	0.000792	0.115	1.90 (3050,162,257,26)			peak9852	peak10555	peak9852
peak45	gene33	-0.0111739	0.00670059	-0.00384298			peak11380	peak10750	peak11380		GO:0061077	chaperone-mediated protein folding	0.000263	1	3.70 (3050,12,549,8)			peak8836	peak7102	peak8836			GO:0048522	positive regulation of cellular process	0.000834	0.119	1.39 (3050,622,257,73)			peak4887	peak9255	peak4887
peak46	gene31	-0.00271851	-0.00508695	0.00338203			peak474	peak166	peak474									peak10799	peak11356	peak10799			GO:0098742	cell-cell adhesion via plasma-membrane adhesion molecules	0.000924	0.128	3.34 (3050,32,257,9)			peak11173	peak8354	peak11173
peak47	gene31	-0.00326304	0.000615292	0.00215736			peak4375	peak7925	peak4375									peak1385	peak6218	peak1385			GO:0035282	segmentation	0.000924	0.125	3.34 (3050,32,257,9)			peak309	peak10790	peak309
peak48	gene31	-0.0072158	0.00280702	-0.00471528			peak3812	peak1337	peak3812									peak10810	peak11306	peak10810			GO:0035114	imaginal disc-derived appendage morphogenesis	0.00095	0.126	2.15 (3050,105,257,19)			peak9980	peak4044	peak9980
peak49	NA	-0.00690199	0.00551035	0.00229644			peak5748	peak6973	peak5748									peak9613	peak6403	peak9613										peak7212	peak6368	peak7212
peak50	NA	0.00828411	-0.00136547	0.022449			peak6706	peak8089	peak6706									peak2755	peak836	peak2755										peak3846	peak2927	peak3846
peak51	gene35	0.00224941	0.00875734	0.014082			peak11334	peak6897	peak11334									peak7252	peak8707	peak7252			Bottom 5%							peak5354	peak6204	peak5354
peak52	gene35	-0.00697805	0.00616367	0.00457679			peak1082	peak10809	peak1082									peak3047	peak6436	peak3047										peak8964	peak2792	peak8964
peak53	gene35	-0.00471669	-0.000200483	0.00619856			peak5246	peak7135	peak5246									peak6028	peak8529	peak6028			GO term	Description	P-value	FDR q-value	Enrichment (N, B, n, b)			peak11195	peak4869	peak11195
peak54	gene35	-0.00422459	-0.00143175	0.0105227			peak7472	peak3747	peak7472									peak672	peak9889	peak672			GO:0019439	aromatic compound catabolic process	0.000117	0.701	3.22 (3050,57,216,13)			peak9012	peak793	peak9012
peak55	gene35	-0.000978847	0.00426899	0.0148747			peak10938	peak11577	peak10938									peak7187	peak7355	peak7187			GO:1901361	organic cyclic compound catabolic process	0.000205	0.611	3.06 (3050,60,216,13)			peak439	peak8874	peak439
peak56	gene35	-0.00418588	-0.00481026	0.0126876			peak7987	peak11363	peak7987									peak9260	peak3342	peak9260			GO:0044270	cellular nitrogen compound catabolic process	0.00028	0.558	3.14 (3050,54,216,12)			peak5629	peak1704	peak5629
peak57	gene36	-0.00402318	-0.00517842	0.00629664			peak8839	peak677	peak8839									peak10993	peak1750	peak10993			GO:0046700	heterocycle catabolic process	0.000402	0.6	3.03 (3050,56,216,12)			peak11193	peak9299	peak11193
peak58	gene37	0.00579268	-0.00821784	0.00361122			peak9856	peak787	peak9856									peak8967	peak9300	peak8967			GO:0034655	nucleobase-containing compound catabolic process	0.00046	0.549	3.17 (3050,49,216,11)			peak457	peak3110	peak457
peak59	gene38	-0.00695547	-0.0045763	0.00588112			peak643	peak3003	peak643									peak3318	peak11341	peak3318			GO:0000956	nuclear-transcribed mRNA catabolic process	0.000746	0.743	4.30 (3050,23,216,7)			peak8201	peak8971	peak8201
peak60	gene38	0.00541553	-0.00327891	0.015159			peak2675	peak4953	peak2675									peak10328	peak1433	peak10328										peak10449	peak3243	peak10449
peak61	gene38	-0.00454352	0.0043548	-0.00313943			peak10753	peak8424	peak10753									peak4393	peak9919	peak4393										peak3899	peak10732	peak3899
peak62	gene39	-0.0034872	-0.00413045	0.0018402			peak9406	peak7152	peak9406									peak5249	peak4072	peak5249			10% extreme							peak3902	peak995	peak3902
peak63	gene39	-0.00456111	-0.00161232	-0.00070368			peak2268	peak2542	peak2268									peak7897	peak8633	peak7897										peak7471	peak835	peak7471
peak64	gene39	-0.00667799	0.00307353	-0.00130877			peak491	peak11311	peak491									peak9963	peak2296	peak9963			GO term	Description	P-value	FDR q-value	Enrichment (N, B, n, b)			peak11194	peak6537	peak11194
peak65	gene39	-0.000232817	0.00608212	0.000419882			peak4781	peak3298	peak4781									peak10435	peak7283	peak10435			GO:0007411	axon guidance	7.38e-07	0.00441	2.03 (3050,150,450,45)			peak7191	peak4403	peak7191
peak66	gene39	-0.00100742	-0.000981512	0.00569993			peak2987	peak11297	peak2987									peak11329	peak8572	peak11329			GO:0007155	cell adhesion	1.21e-06	0.00361	2.50 (3050,76,450,28)			peak8987	peak10090	peak8987
peak67	gene41	-0.00207516	0.00510372	-0.00163459			peak3851	peak6400	peak3851									peak6655	peak6264	peak6655			GO:0098609	cell-cell adhesion	1.4e-06	0.00278	3.01 (3050,45,450,20)			peak11191	peak501	peak11191
peak68	gene41	-0.000446247	-0.000708286	-0.00615845			peak3898	peak2843	peak3898									peak9526	peak11367	peak9526			GO:0022610	biological adhesion	1.64e-06	0.00245	2.46 (3050,77,450,28)			peak8969	peak4023	peak8969
peak69	gene42	0.000555234	-1.10608e-05	0.0110696			peak2161	peak733	peak2161									peak11535	peak3816	peak11535			GO:0097485	neuron projection guidance	2.48e-06	0.00296	1.96 (3050,156,450,45)			peak7381	peak10701	peak7381
peak70	gene42	0.00695882	0.0106715	0.00566582			peak3235	peak2725	peak3235									peak11354	peak5735	peak11354			GO:0098742	cell-cell adhesion via plasma-membrane adhesion molecules	1.37e-05	0.0136	3.18 (3050,32,450,15)			peak4685	peak2126	peak4685
peak71	gene42	0.00416411	0.00041904	0.00711271			peak7379	peak3678	peak7379									peak961	peak8188	peak961			GO:0006928	movement of cell or subcellular component	7.72e-05	0.0658	1.52 (3050,317,450,71)			peak9969	peak11055	peak9969
peak72	gene42	0.00301009	0.00180223	0.0129265			peak7386	peak10435	peak7386									peak10711	peak4047	peak10711			GO:0008045	motor neuron axon guidance	7.98e-05	0.0596	2.62 (3050,44,450,17)			peak4781	peak8750	peak4781
peak73	gene42	-0.00144242	0.0141656	0.00117561			peak1795	peak11427	peak1795									peak6612	peak8872	peak6612			GO:0051259	protein complex oligomerization	0.000161	0.107	3.24 (3050,23,450,11)			peak3235	peak2758	peak3235
peak74	gene42	0.00584257	0.00550139	0.000849895			peak8842	peak11460	peak8842									peak9959	peak519	peak9959			GO:0007606	sensory perception of chemical stimulus	0.000313	0.187	2.75 (3050,32,450,13)			peak11192	peak1439	peak11192
peak75	gene42	-0.00720423	0.00283244	-0.00120247			peak143	peak4427	peak143									peak10843	peak11515	peak10843			GO:0021551	central nervous system morphogenesis	0.000468	0.254	6.78 (3050,4,450,4)			peak4783	peak9376	peak4783
peak76	gene44	0.00319297	-0.00457423	0.00394823			peak962	peak9175	peak962									peak10185	peak5869	peak10185			GO:0032502	developmental process	0.000927	0.461	1.22 (3050,897,450,161)			peak1093	peak142	peak1093
peak77	gene45	0.0128864	-0.012932	-0.0161469			peak1629	peak2738	peak1629									peak10097	peak9915	peak10097			GO:0050789	regulation of biological process	0.000947	0.435	1.14 (3050,1485,450,250)			peak5351	peak8655	peak5351
peak78	gene46	0.0030797	0.00678051	0.00170651			peak4124	peak10738	peak4124									peak8764	peak5873	peak8764										peak3898	peak11325	peak3898
peak79	gene46	0.00685689	-0.00146428	0.00348993			peak2281	peak11592	peak2281									peak4014	peak4491	peak4014										peak1149	peak2356	peak1149
peak80	gene47	0.000790842	-0.00032049	0.00966168			peak11335	peak462	peak11335									peak5341	peak11530	peak5341										peak2660	peak4431	peak2660
peak81	gene52	0.0101524	0.000345412	-0.0105684			peak7278	peak3602	peak7278									peak10535	peak11486	peak10535										peak7187	peak10669	peak7187
peak82	gene53	-0.00372417	-0.0058142	-0.00639731			peak5870	peak906	peak5870									peak3128	peak925	peak3128										peak1563	peak7616	peak1563
peak83	gene55	-0.00478278	0.0161899	-0.00515706			peak3237	peak11599	peak3237									peak8397	peak4363	peak8397										peak4284	peak6886	peak4284
peak84	gene55	-0.00154448	-0.00140681	0.00272002			peak5567	peak4747	peak5567									peak5116	peak3815	peak5116										peak9978	peak6141	peak9978
peak85	gene56	-0.00287055	0.0169704	-0.00553765			peak5624	peak11250	peak5624									peak3961	peak4488	peak3961										peak1503	peak7337	peak1503
peak86	gene55	-5.61223e-05	-0.00127455	0.00557376			peak1829	peak7693	peak1829									peak5060	peak6874	peak5060										peak9641	peak4525	peak9641
peak87	gene55	-0.00399803	-0.00574325	0.00332774			peak7953	peak1060	peak7953									peak2529	peak11565	peak2529										peak3139	peak6264	peak3139
peak88	gene55	-0.0151878	0.00881782	-0.00786961			peak10978	peak8440	peak10978									peak8116	peak11532	peak8116										peak8305	peak10998	peak8305
peak89	gene58	-0.00499836	0.00599774	-0.00321516			peak1046	peak6537	peak1046									peak1421	peak1438	peak1421										peak884	peak3255	peak884
peak90	gene58	-0.0104284	0.00495739	-0.0065239			peak9185	peak9710	peak9185									peak962	peak439	peak962										peak4785	peak7746	peak4785
peak91	gene58	0.00349369	-0.00506219	-0.00951924			peak2338	peak3008	peak2338									peak7305	peak6025	peak7305										peak7957	peak2835	peak7957
peak92	gene58	-0.000603342	0.00114723	-0.0010901			peak10068	peak1034	peak10068									peak2542	peak885	peak2542										peak3758	peak7071	peak3758
peak93	gene58	-0.0133327	0.00385234	0.00171616			peak3319	peak8041	peak3319									peak9054	peak2176	peak9054										peak1505	peak8009	peak1505
peak94	gene60	0.00714258	0.0330184	-0.00528163			peak3853	peak10191	peak3853									peak423	peak5563	peak423										peak9640	peak2814	peak9640
peak95	gene60	-0.00866083	0.0222477	-0.00677616			peak9955	peak4113	peak9955									peak2569	peak11371	peak2569										peak1504	peak6032	peak1504
peak96	gene60	-0.0084754	0.00205156	0.0044387			peak5365	peak3073	peak5365									peak4781	peak5813	peak4781										peak7469	peak10078	peak7469
peak97	gene65	-0.0106639	0.0156713	-0.00326361			peak1170	peak7213	peak1170									peak1392	peak4498	peak1392										peak6929	peak3018	peak6929
peak98	gene65	-0.00532955	0.0075086	-0.00351665			peak4933	peak8638	peak4933									peak5092	peak11309	peak5092										peak4576	peak1051	peak4576
peak99	gene65	-0.00971671	0.00809163	3.29899e-05			peak2554	peak11424	peak2554									peak95	peak409	peak95										peak8248	peak8449	peak8248
peak100	gene65	-0.000476714	0.00833838	0.00779261			peak1121	peak11205	peak1121									peak4814	peak7964	peak4814										peak7379	peak7099	peak7379
peak101	gene68	-0.0122169	0.00704249	-0.00520935			peak5353	peak7559	peak5353									peak3243	peak8076	peak3243										peak522	peak10700	peak522
peak102	gene68	0.00510415	0.00132704	0.00782273			peak10388	peak11540	peak10388									peak5824	peak6697	peak5824										peak7472	peak6183	peak7472
peak103	gene69	0.00597127	0.0150571	-0.00107036			peak10578	peak8249	peak10578									peak7654	peak9422	peak7654										peak3319	peak4498	peak3319
peak104	gene69	-0.0105041	0.00626352	-0.00667578			peak882	peak9939	peak882									peak1454	peak3193	peak1454										peak5591	peak5672	peak5591
peak105	gene69	0.00135156	0.00644931	-0.00654007			peak1831	peak4173	peak1831									peak2212	peak4495	peak2212										peak50	peak7118	peak50
peak106	gene69	0.0039453	0.012301	0.0110564			peak421	peak1494	peak421									peak1719	peak7328	peak1719										peak8963	peak10431	peak8963
peak107	gene69	0.0128557	0.00234943	0.0058664			peak1575	peak2406	peak1575									peak3854	peak9402	peak3854										peak9983	peak8642	peak9983
peak108	gene69	-0.0034146	0.0125315	-0.00365775			peak10478	peak7237	peak10478									peak2301	peak9336	peak2301										peak5598	peak10073	peak5598
peak109	gene69	0.0028058	0.00427184	0.00932612			peak5067	peak10480	peak5067									peak2372	peak6248	peak2372										peak6870	peak5169	peak6870
peak110	gene72	0.000906373	-0.00786062	-0.00163792			peak606	peak11118	peak606									peak9031	peak6313	peak9031										peak9340	peak2405	peak9340
peak111	gene72	-0.00171794	0.00292093	0.00506672			peak1522	peak10843	peak1522									peak4851	peak9296	peak4851										peak9382	peak6383	peak9382
peak112	gene69	-0.00395799	0.00694511	-0.008808			peak2466	peak11517	peak2466									peak6898	peak6138	peak6898										peak9335	peak4083	peak9335
peak113	gene77	-0.00745583	0.0115715	-0.000703946			peak360	peak8083	peak360									peak958	peak10956	peak958										peak1564	peak11527	peak1564
peak114	gene79	-0.00080417	0.0039433	-0.00592354			peak3236	peak10235	peak3236									peak8063	peak9338	peak8063										peak11601	peak7928	peak11601
peak115	gene82	-0.000354704	0.00244887	-0.00506934			peak4437	peak10255	peak4437									peak8626	peak7200	peak8626										peak1830	peak3635	peak1830
peak116	gene84	0.00389794	-0.00354003	0.00303248			peak1077	peak423	peak1077									peak9697	peak6693	peak9697										peak4579	peak6921	peak4579
peak117	gene85	-0.0109667	-0.00609047	-0.0221277			peak5075	peak5512	peak5075									peak1544	peak11256	peak1544										peak1592	peak11557	peak1592
peak118	gene85	0.00348063	-0.00238856	-0.000785391			peak5834	peak4504	peak5834									peak10812	peak4490	peak10812										peak7211	peak3634	peak7211
peak119	gene86	-0.00428788	0.0100397	0.00100719			peak11166	peak11293	peak11166									peak9787	peak3214	peak9787										peak7470	peak3072	peak7470
peak120	gene86	-0.00562671	0.00808891	-0.00490665			peak7432	peak11458	peak7432									peak4716	peak3894	peak4716										peak4688	peak9837	peak4688
peak121	gene86	-0.00770682	-0.000692334	-0.00384177			peak1023	peak11582	peak1023									peak5623	peak8081	peak5623										peak11196	peak1980	peak11196
peak122	gene89	0.00338831	0.0111071	0.00149788			peak7441	peak11597	peak7441									peak10170	peak10817	peak10170										peak8306	peak7453	peak8306
peak123	gene91	0.00561174	0.000193697	0.00142155			peak1833	peak11541	peak1833									peak4352	peak11483	peak4352										peak961	peak6694	peak961
peak124	gene91	0.0030412	0.00349204	0.00241151			peak2345	peak6787	peak2345									peak5774	peak11149	peak5774										peak9979	peak9956	peak9979
peak125	gene91	-5.52387e-05	0.00664028	-0.00102388			peak2346	peak11583	peak2346									peak848	peak6335	peak848										peak7467	peak6874	peak7467
peak126	gene93	0.00801219	0.00190119	0.00258978			peak11378	peak1668	peak11378									peak3451	peak9185	peak3451										peak3761	peak5242	peak3761
peak127	gene96	0.00190002	0.0055659	-0.0136564			peak5034	peak2265	peak5034									peak1507	peak1836	peak1507										peak3845	peak7964	peak3845
peak128	gene98	-0.00195088	-0.00674592	-0.00836072			peak1830	peak676	peak1830									peak11339	peak1674	peak11339										peak7238	peak2036	peak7238
peak129	gene99	0.00667526	-0.00138828	0.00654245			peak8389	peak3133	peak8389									peak4601	peak9978	peak4601										peak9586	peak8298	peak9586
peak130	gene101	0.00397312	-0.00549745	-0.000105258			peak4980	peak4511	peak4980									peak7308	peak11544	peak7308										peak7271	peak8869	peak7271
peak131	gene102	0.00837907	-0.00156624	-0.0130673			peak1588	peak7990	peak1588									peak1655	peak6533	peak1655										peak9584	peak11121	peak9584
peak132	gene103	-0.00414501	0.00672187	-0.00222843			peak9186	peak6480	peak9186									peak4212	peak11471	peak4212										peak7394	peak3374	peak7394
peak133	gene105	-0.0100582	0.00885305	-0.0131921			peak600	peak1278	peak600									peak7898	peak983	peak7898										peak1055	peak10535	peak1055
peak134	gene105	-0.00878379	-0.00166735	-0.00767871			peak6815	peak7638	peak6815									peak7559	peak6950	peak7559										peak9675	peak9939	peak9675
peak135	gene105	-0.0041872	0.00474902	-0.00580582			peak11069	peak9251	peak11069									peak3130	peak5641	peak3130										peak8965	peak1122	peak8965
peak136	gene105	-0.00520425	-0.000569449	-0.00112986			peak7924	peak3597	peak7924									peak4576	peak11396	peak4576										peak8308	peak8578	peak8308
peak137	gene105	-0.00227914	0.0123071	0.000709041			peak7394	peak11241	peak7394									peak1152	peak9013	peak1152										peak11174	peak5434	peak11174
peak138	gene105	-0.00479924	0.0046952	-0.0016506			peak1828	peak9697	peak1828									peak10992	peak8401	peak10992										peak1562	peak3201	peak1562
peak139	gene105	-0.0221169	0.00978159	-0.00995522			peak756	peak8410	peak756									peak8097	peak11383	peak8097										peak9656	peak8854	peak9656
peak140	gene122	-0.0272037	0.0101405	-0.0123342			peak6736	peak10657	peak6736									peak9837	peak3933	peak9837										peak1100	peak11264	peak1100
peak141	gene119	0.0129573	-0.00807913	-0.0210409			peak9296	peak2842	peak9296									peak4337	peak3286	peak4337										peak2647	peak10362	peak2647
peak142	gene119	0.00509172	0.00118082	-0.0173497			peak7471	peak1364	peak7471									peak7920	peak11420	peak7920										peak3897	peak6665	peak3897
peak143	gene123	0.02157	-0.030867	-0.0116656			peak10737	peak6705	peak10737									peak3105	peak9984	peak3105										peak11091	peak2440	peak11091
peak144	gene123	0.0147268	-0.0129052	-0.00973116			peak6851	peak1152	peak6851									peak9542	peak4215	peak9542										peak3895	peak2174	peak3895
peak145	gene123	-0.00473633	0.00298112	-0.0103996			peak5351	peak3576	peak5351									peak3758	peak3072	peak3758										peak9547	peak7990	peak9547
peak146	gene124	0.0030579	0.007158	0.00410952			peak6660	peak9174	peak6660									peak9657	peak11380	peak9657										peak1756	peak3980	peak1756
peak147	gene129	0.0145059	-0.00303753	-0.00127323			peak6344	peak4751	peak6344									peak10329	peak8103	peak10329										peak6065	peak9251	peak6065
peak148	gene128	0.014568	-0.00804971	0.0063974			peak11611	peak9814	peak11611									peak745	peak11470	peak745										peak883	peak7648	peak883
peak149	gene130	0.0154565	-0.00367507	-0.00619576			peak5735	peak4500	peak5735									peak5573	peak2426	peak5573										peak4578	peak7995	peak4578
peak150	gene135	0.00891965	-0.00934975	-0.0135844			peak11435	peak11092	peak11435									peak8150	peak11369	peak8150										peak4689	peak6598	peak4689
peak151	gene135	0.00509081	-0.00560048	-0.00228369			peak2189	peak9655	peak2189									peak3842	peak9967	peak3842										peak9961	peak8873	peak9961
peak152	gene135	-0.000884215	0.00115	-0.00375516			peak7645	peak6911	peak7645									peak9463	peak10938	peak9463										peak6186	peak4882	peak6186
peak153	gene137	0.00554208	-0.00179799	-0.00858696			peak10075	peak9944	peak10075									peak10068	peak4281	peak10068										peak3896	peak3073	peak3896
peak154	gene138	0.00503063	-0.00062909	0.00756269			peak6694	peak4906	peak6694									peak8770	peak4523	peak8770										peak401	peak1253	peak401
peak155	gene151	0.00738949	-0.008273	-0.00946563			peak400	peak8509	peak400									peak3883	peak9337	peak3883										peak4550	peak5417	peak4550
peak156	gene153	-0.02048	0.016177	-0.00689739			peak8969	peak2449	peak8969									peak8545	peak11288	peak8545										peak313	peak10959	peak313
peak157	gene154	0.00583755	0.00593812	-0.0103226			peak3486	peak10992	peak3486									peak1238	peak11169	peak1238										peak1054	peak7593	peak1054
peak158	gene154	-0.0205836	0.0131671	0.00258909			peak361	peak8951	peak361									peak8425	peak11434	peak8425										peak4593	peak2272	peak4593
peak159	gene154	-0.0100168	0.00495354	-0.00465657			peak7381	peak8191	peak7381									peak7683	peak6056	peak7683										peak9339	peak8103	peak9339
peak160	gene155	0.00253213	0.00805009	0.00032004			peak609	peak7920	peak609									peak3049	peak7292	peak3049										peak4580	peak2151	peak4580
peak161	gene155	0.00977776	-0.011333	0.01383			peak8182	peak1444	peak8182									peak9171	peak11562	peak9171										peak4686	peak263	peak4686
peak162	gene155	-0.00473583	-0.00177944	0.0121835			peak11329	peak8484	peak11329									peak5356	peak1595	peak5356										peak7590	peak8524	peak7590
peak163	gene155	0.00028421	0.00222147	0.00725058			peak3553	peak6227	peak3553									peak4511	peak1947	peak4511										peak7279	peak10235	peak7279
peak164	gene159	0.00097592	0.00563152	-0.00519206			peak9102	peak7217	peak9102									peak10973	peak11242	peak10973										peak7380	peak1257	peak7380
peak165	gene160	-0.00438447	0.0149211	-0.00308535			peak9100	peak10534	peak9100									peak1579	peak7193	peak1579										peak7189	peak2875	peak7189
peak166	gene159	-0.0160365	0.00911193	-0.0110597			peak9953	peak377	peak9953									peak11008	peak9339	peak11008										peak4618	peak218	peak4618
peak167	gene159	0.0136686	-0.0119257	-0.0230674			peak1604	peak5744	peak1604									peak8858	peak5018	peak8858										peak1616	peak1496	peak1616
peak168	gene159	0.00655858	-0.00287878	-0.0211169			peak1501	peak516	peak1501									peak9158	peak319	peak9158										peak8838	peak7402	peak8838
peak169	gene160	0.00159341	-0.000581754	0.00862306			peak6665	peak807	peak6665									peak1484	peak8590	peak1484										peak6869	peak7877	peak6869
peak170	gene165	0.0158704	-0.00976093	-0.0278728			peak9716	peak3565	peak9716									peak8798	peak1128	peak8798										peak1580	peak5938	peak1580
peak171	gene167	0.00687794	0.00528727	-0.00529444			peak430	peak1597	peak430									peak9147	peak4630	peak9147										peak9977	peak2490	peak9977
peak172	gene168	-0.00406066	0.00848615	-0.00588971			peak4646	peak10503	peak4646									peak10434	peak4728	peak10434										peak1107	peak9190	peak1107
peak173	gene169	0.00152234	-0.00164093	0.00195525			peak2467	peak4882	peak2467									peak11188	peak311	peak11188										peak7589	peak4120	peak7589
peak174	gene173	0.00798074	-0.00441103	-0.00272664			peak3022	peak8967	peak3022									peak6276	peak10578	peak6276										peak7209	peak7475	peak7209
peak175	gene173	-0.00283591	0.000328217	0.00386348			peak11044	peak11399	peak11044									peak9435	peak7659	peak9435										peak7190	peak9110	peak7190
peak176	gene174	-0.00709325	0.0095324	-0.00733423			peak9166	peak6786	peak9166									peak6605	peak7618	peak6605										peak1831	peak10446	peak1831
peak177	gene174	0.00319102	0.00338239	0.00639274			peak7188	peak9134	peak7188									peak2725	peak11264	peak2725										peak6777	peak5228	peak6777
peak178	gene177	0.000112888	0.00726279	-0.023839			peak4690	peak8721	peak4690									peak1631	peak5742	peak1631										peak5595	peak1815	peak5595
peak179	gene177	-0.00762296	-0.00531137	-0.0115436			peak4685	peak8057	peak4685									peak11187	peak3241	peak11187										peak11536	peak5873	peak11536
peak180	gene177	0.00269148	-0.000824902	-0.0056485			peak10875	peak6754	peak10875									peak10035	peak8874	peak10035										peak1091	peak9558	peak1091
peak181	gene177	-0.00679169	0.00664745	0.000227659			peak6164	peak2446	peak6164									peak9772	peak8111	peak9772										peak9587	peak3500	peak9587
peak182	gene177	-5.4062e-05	-0.00266441	0.000892848			peak1055	peak2394	peak1055									peak6452	peak2297	peak6452										peak9982	peak4775	peak9982
peak183	gene178	-0.00379397	-4.35133e-05	0.00778912			peak5653	peak210	peak5653									peak8793	peak4982	peak8793										peak1013	peak8180	peak1013
peak184	gene178	-0.00395394	0.00520657	0.00392181			peak6697	peak11525	peak6697									peak6338	peak8821	peak6338										peak11611	peak7521	peak11611
peak185	gene178	-0.0104128	0.00467528	0.00280189			peak1751	peak3243	peak1751									peak7847	peak4582	peak7847										peak7204	peak10797	peak7204
peak186	gene178	-0.00331844	0.00257937	0.0111802			peak2490	peak1893	peak2490									peak9291	peak3100	peak9291										peak9013	peak9559	peak9013
peak187	gene178	-0.0184039	0.0177435	-0.0104823			peak592	peak9279	peak592									peak747	peak928	peak747										peak4572	peak5648	peak4572
peak188	NA	-0.000347672	0.0168835	0.00311336			peak2207	peak11520	peak2207									peak1581	peak6266	peak1581										peak2646	peak10125	peak2646
peak189	gene179	-0.00793339	0.0144982	-0.010734			peak4982	peak2527	peak4982									peak11335	peak6740	peak11335										peak311	peak8749	peak311
peak190	gene179	0.00451252	-0.00423179	-0.00681875			peak4606	peak40	peak4606									peak4937	peak9747	peak4937										peak3901	peak8448	peak3901
peak191	gene179	0.000308426	-0.00365029	-0.00693149			peak3308	peak3299	peak3308									peak3134	peak9077	peak3134										peak2661	peak5485	peak2661
peak192	gene179	0.00418534	-0.00431636	-0.00246036			peak1451	peak5329	peak1451									peak7593	peak8912	peak7593										peak5699	peak7947	peak5699
peak193	gene181	-0.00385841	0.0144394	-0.00346525			peak4851	peak11482	peak4851									peak5397	peak4366	peak5397										peak9962	peak3506	peak9962
peak194	gene184	0.00288695	0.0105328	-0.0210908			peak9823	peak11522	peak9823									peak5620	peak10737	peak5620										peak11495	peak6094	peak11495
peak195	gene184	-0.000661575	0.00221747	-0.0163964			peak1705	peak6294	peak1705									peak5078	peak11170	peak5078										peak4577	peak2626	peak4577
peak196	gene186	-0.00245552	-0.00330366	0.00564061			peak4343	peak1497	peak4343									peak595	peak10388	peak595										peak8940	peak5647	peak8940
peak197	gene186	-0.00855483	0.00415019	-0.00156356			peak5237	peak10477	peak5237									peak7698	peak8869	peak7698										peak8053	peak4470	peak8053
peak198	gene186	-0.0034795	-0.00629304	0.00314648			peak1161	peak11302	peak1161									peak2320	peak3767	peak2320										peak1053	peak7033	peak1053
peak199	gene190	0.0151336	-0.0283565	-0.0132707			peak7473	peak4212	peak7473									peak7888	peak7071	peak7888										peak1102	peak10789	peak1102
peak200	gene191	0.00542058	-0.00944318	0.0011962			peak1438	peak11173	peak1438									peak7994	peak426	peak7994										peak5628	peak1087	peak5628
peak201	gene193	0.000406406	0.0113355	-0.00437342			peak10313	peak3735	peak10313									peak8841	peak4759	peak8841										peak8842	peak1118	peak8842
peak202	gene198	-0.0101837	0.00462194	-0.0105118			peak2583	peak8153	peak2583									peak3865	peak6314	peak3865										peak6066	peak10299	peak6066
peak203	gene198	-0.000887728	-0.00246522	0.00206418			peak3816	peak2228	peak3816									peak6200	peak5399	peak6200										peak1832	peak10585	peak1832
peak204	gene198	-0.0121511	0.00433154	0.00435847			peak4709	peak11594	peak4709									peak2453	peak2401	peak2453										peak310	peak7554	peak310
peak205	gene198	-0.0124608	0.00872262	-0.00666708			peak881	peak2626	peak881									peak4909	peak10313	peak4909										peak1411	peak11262	peak1411
peak206	gene198	-0.00602305	-0.00800254	0.00386322			peak9770	peak11410	peak9770									peak5788	peak4785	peak5788										peak11609	peak706	peak11609
peak207	gene198	-0.00420045	8.91499e-05	0.0075162			peak8837	peak187	peak8837									peak9110	peak8078	peak9110										peak1066	peak7389	peak1066
peak208	gene198	-0.0103897	0.00893745	-0.00877084			peak10316	peak1335	peak10316									peak11219	peak3726	peak11219										peak3142	peak1906	peak3142
peak209	gene198	-0.013848	-0.0028797	-0.00284494			peak1750	peak7918	peak1750									peak9998	peak7176	peak9998										peak4782	peak6697	peak4782
peak210	gene198	-0.0179285	0.0118921	-0.000255025			peak6909	peak10636	peak6909									peak10957	peak5585	peak10957										peak10749	peak2377	peak10749
peak211	gene198	0.00491312	0.00675913	0.0144238			peak4321	peak11242	peak4321									peak8145	peak5891	peak8145										peak5845	peak7785	peak5845
peak212	gene198	-0.0012272	0.00435997	0.00702088			peak6310	peak7770	peak6310									peak8795	peak4688	peak8795										peak7466	peak1991	peak7466
peak213	NA	0.00764849	-0.0464492	-0.0126837			peak1832	peak9421	peak1832									peak11333	peak284	peak11333										peak8307	peak5214	peak8307
peak214	NA	0.00429434	-0.0014083	0.000442303			peak5746	peak513	peak5746									peak11123	peak11214	peak11123										peak1757	peak11510	peak1757
peak215	NA	-0.00444379	0.00115975	0.00388675			peak4495	peak1641	peak4495									peak7186	peak8283	peak7186										peak7559	peak3978	peak7559
peak216	gene202	-0.00616115	0.0142801	-0.00608689			peak4060	peak8314	peak4060									peak5383	peak612	peak5383										peak8962	peak10040	peak8962
peak217	gene202	-0.0076656	0.0133515	-0.0162362			peak8132	peak6703	peak8132									peak2749	peak11278	peak2749										peak3857	peak1125	peak3857
peak218	gene202	-0.00563341	0.00103434	-0.0181928			peak8869	peak6166	peak8869									peak2819	peak9167	peak2819										peak7473	peak11514	peak7473
peak219	gene202	0.00740894	0.00285669	-0.0088542			peak8234	peak4352	peak8234									peak7112	peak2660	peak7112										peak2369	peak8286	peak2369
peak220	gene203	-0.0105771	0.00765235	-0.00872742			peak4602	peak1093	peak4602									peak2047	peak11395	peak2047										peak7207	peak5969	peak7207
peak221	gene203	-0.00361784	0.017232	-0.00443161			peak2565	peak11542	peak2565									peak2248	peak6922	peak2248										peak7588	peak6218	peak7588
peak222	gene203	-0.00422444	0.0133256	-0.0099756			peak9095	peak1291	peak9095									peak8217	peak11447	peak8217										peak3793	peak11020	peak3793
peak223	gene203	0.00276869	0.0122261	0.0113293			peak5702	peak3527	peak5702									peak10349	peak11495	peak10349										peak836	peak4875	peak836
peak224	gene203	-0.00359602	0.00681997	0.00138618			peak5672	peak7589	peak5672									peak7811	peak6202	peak7811										peak1077	peak409	peak1077
peak225	gene203	-0.000156412	0.00395662	0.00216469			peak672	peak2529	peak672									peak187	peak2987	peak187										peak11493	peak2577	peak11493
peak226	gene203	-0.00681481	0.00964954	-0.00629574			peak9167	peak7465	peak9167									peak3633	peak5870	peak3633										peak7280	peak5386	peak7280
peak227	gene210	0.00327568	-0.00393642	0.00148155			peak4735	peak4617	peak4735									peak9561	peak11241	peak9561										peak8056	peak10371	peak8056
peak228	gene211	0.00256374	-0.00189918	0.00998517			peak8119	peak4128	peak8119									peak9735	peak11525	peak9735										peak7237	peak10523	peak7237
peak229	gene211	0.00788299	-0.00478524	0.00214298			peak7540	peak8300	peak7540									peak2803	peak4046	peak2803										peak7558	peak8232	peak7558
peak230	gene211	-0.00413437	0.00512706	-0.00030404			peak4183	peak7361	peak4183									peak1891	peak4678	peak1891										peak4595	peak9257	peak4595
peak231	gene212	0.000229996	-0.00397298	0.000952917			peak2652	peak3582	peak2652									peak11463	peak10561	peak11463										peak7240	peak11438	peak7240
peak232	gene212	-0.00898043	-0.0138371	-0.0209023			peak3846	peak6098	peak3846									peak7511	peak9678	peak7511										peak9502	peak9914	peak9502
peak233	gene211	0.00135778	-0.00284115	-0.00220066			peak10870	peak5460	peak10870									peak1984	peak9846	peak1984										peak9014	peak8063	peak9014
peak234	gene212	-0.00737613	-0.00109374	-0.0068324			peak11535	peak11412	peak11535									peak7757	peak8987	peak7757										peak11175	peak4751	peak11175
peak235	gene213	0.00215407	-0.011726	-0.0139435			peak7161	peak2223	peak7161									peak8101	peak9953	peak8101										peak11170	peak1973	peak11170
peak236	gene216	0.00291577	-0.000497323	-0.00659145			peak9907	peak6292	peak9907									peak834	peak9964	peak834										peak9338	peak10867	peak9338
peak237	gene215	0.00768974	-0.0125703	-0.0136077			peak1282	peak10791	peak1282									peak9778	peak9640	peak9778										peak4731	peak5211	peak4731
peak238	gene218	-0.0101499	0.000781251	-0.00911021			peak3742	peak1092	peak3742									peak10477	peak8609	peak10477										peak10511	peak5600	peak10511
peak239	gene220	-0.0130438	0.00226105	-0.00452364			peak5973	peak11462	peak5973									peak9941	peak9504	peak9941										peak8150	peak8617	peak8150
peak240	gene220	-0.00961681	0.0058471	-0.00247928			peak5175	peak417	peak5175									peak2613	peak9586	peak2613										peak8057	peak3813	peak8057
peak241	gene218	0.000993523	0.0056739	-0.00926625			peak170	peak5295	peak170									peak10999	peak10158	peak10999										peak9337	peak9038	peak9337
peak242	gene218	0.00584226	-0.00593666	-0.00201546			peak5208	peak11602	peak5208									peak9916	peak6841	peak9916										peak702	peak7462	peak702
peak243	gene218	0.00453742	-0.00607488	0.00136664			peak7172	peak11420	peak7172									peak9658	peak3857	peak9658										peak5779	peak3308	peak5779
peak244	gene223	-0.0019028	-0.00395586	-0.0026013			peak3555	peak1318	peak3555									peak6872	peak5821	peak6872										peak3894	peak3019	peak3894
peak245	gene223	0.0052246	-0.00635449	0.00195283			peak8872	peak6722	peak8872									peak221	peak248	peak221										peak11231	peak8	peak11231
peak246	gene229	0.00444272	-0.00682722	-0.0100538			peak9462	peak9545	peak9462									peak4504	peak5325	peak4504										peak8074	peak6906	peak8074
peak247	gene229	-0.00608579	0.00380156	-0.00491249			peak4710	peak9968	peak4710									peak9193	peak11215	peak9193										peak7392	peak7582	peak7392
peak248	gene230	0.00893518	-0.0181521	-0.00502746			peak10301	peak11231	peak10301									peak2009	peak11194	peak2009										peak1412	peak3622	peak1412
peak249	gene235	0.00879627	-0.0198902	-0.0245093			peak5424	peak2915	peak5424									peak11189	peak9863	peak11189										peak3376	peak11267	peak3376
peak250	gene241	0.00200386	-0.000479302	-0.00328758			peak814	peak11188	peak814									peak10342	peak5653	peak10342										peak9712	peak1477	peak9712
peak251	gene244	0.00189113	0.00185095	-0.00720324			peak608	peak11294	peak608									peak85	peak4628	peak85										peak1828	peak7971	peak1828
peak252	gene245	0.00874126	0.00129146	-0.00808391			peak9160	peak11530	peak9160									peak7787	peak1616	peak7787										peak5590	peak8931	peak5590
peak253	gene263	0.0102601	-0.0143466	-0.00819569			peak6127	peak9959	peak6127									peak2599	peak3138	peak2599										peak6649	peak6894	peak6649
peak254	gene264	0.0045627	0.00192991	-0.0159539			peak875	peak9958	peak875									peak4502	peak8174	peak4502										peak935	peak4435	peak935
peak255	gene276	-0.000989498	0.00485109	-0.00220111			peak1567	peak478	peak1567									peak9490	peak11202	peak9490										peak3448	peak431	peak3448
peak256	gene283	-0.00153312	0.00117349	0.0015954			peak4835	peak6211	peak4835									peak3172	peak3120	peak3172										peak7395	peak1884	peak7395
peak257	gene283	-0.00138244	0.00743673	-0.00578243			peak6226	peak7528	peak6226									peak188	peak3553	peak188										peak1928	peak1982	peak1928
peak258	gene283	-0.00463382	0.00196146	-8.39788e-05			peak2577	peak4679	peak2577									peak2127	peak942	peak2127										peak9934	peak2177	peak9934
peak259	gene291	0.00224808	-4.97028e-05	0.00840551			peak1640	peak8633	peak1640									peak2929	peak5834	peak2929										peak7329	peak10938	peak7329
peak260	gene298	0.00351301	0.00608307	0.00161541			peak5952	peak1922	peak5952									peak3041	peak1512	peak3041										peak5597	peak4718	peak5597
peak261	gene298	0.00977191	-0.00195836	-0.00158732			peak5734	peak10329	peak5734									peak4617	peak7466	peak4617										peak5757	peak1073	peak5757
peak262	gene299	0.00836083	-0.00720049	-0.0127424			peak2261	peak4598	peak2261									peak4879	peak6165	peak4879										peak1820	peak3765	peak1820
peak263	gene299	0.0103448	-0.0082743	-0.0181585			peak149	peak11094	peak149									peak9710	peak8010	peak9710										peak8142	peak4414	peak8142
peak264	gene300	0.0150717	-0.00872047	-0.00372036			peak5891	peak9472	peak5891									peak10503	peak8234	peak10503										peak697	peak11064	peak697
peak265	gene302	0.00756932	-0.012507	-0.00599578			peak7292	peak2034	peak7292									peak1435	peak2247	peak1435										peak4106	peak5987	peak4106
peak266	gene304	-0.00182145	-0.0082205	-0.00162148			peak6219	peak5742	peak6219									peak3701	peak8443	peak3701										peak2657	peak3576	peak2657
peak267	gene304	0.000635104	-0.00675607	0.00969059			peak9409	peak5774	peak9409									peak9286	peak3812	peak9286										peak1567	peak601	peak1567
peak268	gene306	0.0101822	-0.00327644	0.0054809			peak9888	peak9066	peak9888									peak291	peak9102	peak291										peak7299	peak553	peak7299
peak269	gene309	0.0082521	0.00181834	-0.0142649			peak7362	peak9996	peak7362									peak3829	peak4083	peak3829										peak443	peak6555	peak443
peak270	gene311	-0.0269392	-0.00222444	-0.00129829			peak3813	peak661	peak3813									peak10536	peak912	peak10536										peak5796	peak8389	peak5796
peak271	gene311	-0.0219935	-0.00472153	-0.0114088			peak11055	peak7923	peak11055									peak569	peak11520	peak569										peak9152	peak1661	peak9152
peak272	gene311	0.00161598	0.0116996	-0.013886			peak7921	peak10078	peak7921									peak7996	peak6152	peak7996										peak902	peak3185	peak902
peak273	gene311	0.000668518	0.00102193	0.00320432			peak9299	peak9875	peak9299									peak2658	peak6078	peak2658										peak5885	peak1695	peak5885
peak274	gene311	-0.00532333	0.00246953	0.000931421			peak1378	peak3379	peak1378									peak3670	peak7299	peak3670										peak2166	peak8793	peak2166
peak275	gene311	-0.0100223	-0.00364994	-0.00214546			peak4363	peak2453	peak4363									peak4987	peak9888	peak4987										peak3852	peak2906	peak3852
peak276	gene317	-0.00552858	0.0120009	-0.015717			peak457	peak7889	peak457									peak10498	peak11361	peak10498										peak1094	peak11528	peak1094
peak277	gene315	-0.0248876	-0.000655416	-0.00435538			peak5372	peak2535	peak5372									peak5089	peak9482	peak5089										peak4592	peak2426	peak4592
peak278	gene314	-0.0147929	0.00179439	-0.0111802			peak2487	peak11533	peak2487									peak6784	peak10392	peak6784										peak9136	peak2306	peak9136
peak279	gene318	0.00496006	0.00163924	0.00331897			peak5809	peak10111	peak5809									peak9945	peak2652	peak9945										peak11610	peak10679	peak11610
peak280	gene319	-0.00181192	0.00712288	-0.00697865			peak199	peak2556	peak199									peak7954	peak3742	peak7954										peak8109	peak3742	peak8109
peak281	gene322	0.00258407	0.00185659	-0.00930736			peak11147	peak11266	peak11147									peak3984	peak5514	peak3984										peak11494	peak8321	peak11494
peak282	gene327	0.00624374	0.00613077	-0.00201583			peak5887	peak11604	peak5887									peak514	peak8214	peak514										peak703	peak1885	peak703
peak283	gene328	-0.000533657	0.010074	-0.0015532			peak9190	peak11236	peak9190									peak9958	peak2295	peak9958										peak7217	peak1916	peak7217
peak284	gene328	0.0136742	-0.0175086	-0.00408045			peak6701	peak11008	peak6701									peak3088	peak8813	peak3088										peak8995	peak10467	peak8995
peak285	gene330	-0.00621736	0.00780368	-0.00960217			peak3765	peak11003	peak3765									peak7287	peak10855	peak7287										peak9504	peak2915	peak9504
peak286	gene330	0.00345268	-0.00420391	-0.00360018			peak2719	peak11046	peak2719									peak9608	peak11221	peak9608										peak3274	peak3004	peak3274
peak287	gene331	-0.0048402	0.00482268	-0.0072583			peak9444	peak5293	peak9444									peak1508	peak4646	peak1508										peak5865	peak1909	peak5865
peak288	gene331	0.00652447	0.00148696	-0.000999122			peak8111	peak1299	peak8111									peak10125	peak2201	peak10125										peak2466	peak3052	peak2466
peak289	gene331	0.00440941	0.0031312	0.00085914			peak264	peak11401	peak264									peak10709	peak9810	peak10709										peak1146	peak11189	peak1146
peak290	gene331	0.000869902	0.00719703	-0.00857172			peak2545	peak2342	peak2545									peak2377	peak6694	peak2377										peak5625	peak10537	peak5625
peak291	gene331	0.00817105	0.0167024	0.00165542			peak10065	peak11528	peak10065									peak5094	peak11184	peak5094										peak10137	peak1438	peak10137
peak292	gene331	0.0042751	-0.00234863	0.00407227			peak9956	peak3583	peak9956									peak5572	peak2181	peak5572										peak4788	peak4661	peak4788
peak293	gene336	0.00498632	-0.000836999	-0.00646833			peak10788	peak9484	peak10788									peak9472	peak8844	peak9472										peak9989	peak2842	peak9989
peak294	gene338	0.00330087	0.00573388	0.00187275			peak7977	peak10417	peak7977									peak8720	peak3966	peak8720										peak4571	peak941	peak4571
peak295	gene341	0.000873029	0.0098404	-0.0169737			peak11219	peak2534	peak11219									peak7265	peak11267	peak7265										peak459	peak5828	peak459
peak296	gene342	-0.00825385	0.0156685	-0.0123748			peak1294	peak2755	peak1294									peak10777	peak11597	peak10777										peak10061	peak2865	peak10061
peak297	gene342	0.00207763	0.0109677	0.000353059			peak1088	peak4879	peak1088									peak6290	peak3139	peak6290										peak7188	peak6155	peak7188
peak298	gene343	-0.000449142	0.00612605	0.00277931			peak7799	peak5623	peak7799									peak2690	peak11423	peak2690										peak4905	peak5514	peak4905
peak299	gene345	0.00447064	0.00224547	-0.0123569			peak1254	peak8861	peak1254									peak10795	peak2983	peak10795										peak1758	peak2759	peak1758
peak300	gene346	-0.00223584	0.00286453	-0.00974095			peak11074	peak11439	peak11074									peak83	peak3504	peak83										peak3377	peak2863	peak3377
peak301	gene347	-0.00574334	0.00686298	-0.0125975			peak4777	peak156	peak4777									peak156	peak8777	peak156										peak8266	peak9888	peak8266
peak302	gene347	0.000263531	0.0131681	-0.0071559			peak8238	peak11580	peak8238									peak7338	peak11374	peak7338										peak704	peak10562	peak704
peak303	gene347	-0.00344041	0.00375761	-0.0129988			peak5169	peak3390	peak5169									peak9304	peak10608	peak9304										peak699	peak6733	peak699
peak304	gene347	-0.00255454	0.00232959	0.00534023			peak8766	peak158	peak8766									peak6453	peak2183	peak6453										peak859	peak10682	peak859
peak305	gene357	0.00484547	0.00637704	-0.00338643			peak1621	peak3854	peak1621									peak3806	peak2672	peak3806										peak8244	peak6397	peak8244
peak306	gene357	-0.0014854	-0.00103433	0.000647009			peak4637	peak11050	peak4637									peak7812	peak8442	peak7812										peak9336	peak4737	peak9336
peak307	gene357	0.00913317	-0.0062162	-0.00141881			peak9026	peak2175	peak9026									peak4936	peak249	peak4936										peak1090	peak10723	peak1090
peak308	gene361	0.00145471	0.00336347	-0.0059962			peak9966	peak3953	peak9966									peak5969	peak7556	peak5969										peak9655	peak9060	peak9655
peak309	gene370	-0.00907952	-0.0227416	0.0263487			peak325	peak11467	peak325									peak6341	peak2345	peak6341										peak9767	peak7302	peak9767
peak310	gene370	-0.0210587	-0.0284072	0.0184244			peak8279	peak10608	peak8279									peak2079	peak3053	peak2079										peak7200	peak1960	peak7200
peak311	gene370	-0.00543203	-0.0169628	0.0189352			peak4026	peak10342	peak4026									peak2535	peak883	peak2535										peak9182	peak11278	peak9182
peak312	gene370	-0.0122396	-0.0138203	0.0122543			peak4112	peak11197	peak4112									peak9999	peak9856	peak9999										peak8723	peak3120	peak8723
peak313	gene370	-0.00630397	-0.0238914	0.020066			peak11112	peak7212	peak11112									peak5329	peak6906	peak5329										peak11546	peak1671	peak11546
peak314	gene371	0.00402854	0.00296873	0.00837359			peak144	peak10164	peak144									peak6444	peak11379	peak6444										peak481	peak8073	peak481
peak315	gene371	0.000293987	-0.0101067	-0.010852			peak8214	peak1508	peak8214									peak966	peak4578	peak966										peak2455	peak642	peak2455
peak316	gene372	0.0010538	-0.0108749	-0.00237487			peak1051	peak6383	peak1051									peak7285	peak6842	peak7285										peak5599	peak6745	peak5599
peak317	gene375	-0.00879667	-0.0138297	-0.00197388			peak2064	peak11457	peak2064									peak5717	peak11388	peak5717										peak10328	peak8861	peak10328
peak318	gene376	0.00450651	-0.0111144	-0.00918516			peak10867	peak310	peak10867									peak3087	peak6207	peak3087										peak2338	peak7216	peak2338
peak319	gene376	-0.00137503	-0.0168522	0.00130351			peak4366	peak3306	peak4366									peak8709	peak3918	peak8709										peak7282	peak427	peak7282
peak320	gene376	0.0067216	-0.00956761	0.00386665			peak1722	peak6552	peak1722									peak7188	peak11603	peak7188										peak701	peak7600	peak701
peak321	gene376	-0.00403336	-0.000694467	0.00366387			peak3523	peak11265	peak3523									peak6666	peak4847	peak6666										peak8188	peak7171	peak8188
peak322	gene378	-0.000817217	-0.00545124	-0.00324207			peak3475	peak11300	peak3475									peak8475	peak6249	peak8475										peak10327	peak4735	peak10327
peak323	gene378	-0.00481331	0.00526197	-0.0019746			peak8873	peak2332	peak8873									peak6252	peak11373	peak6252										peak9577	peak10992	peak9577
peak324	gene381	0.00192855	0.0071046	-0.000678858			peak7659	peak7190	peak7659									peak9273	peak4652	peak9273										peak1361	peak3747	peak1361
peak325	gene388	0.0147908	-0.00811842	-0.0133297			peak148	peak7600	peak148									peak1015	peak456	peak1015										peak11176	peak6639	peak11176
peak326	gene391	0.00942971	-0.00315606	-0.0126778			peak5401	peak4979	peak5401									peak10734	peak5938	peak10734										peak4553	peak1451	peak4553
peak327	gene395	0.00561706	0.00821282	-0.00458141			peak6266	peak11438	peak6266									peak5175	peak4591	peak5175										peak3872	peak232	peak3872
peak328	gene396	0.00586404	0.00266898	-0.0023323			peak147	peak8692	peak147									peak6552	peak6769	peak6552										peak9219	peak2189	peak9219
peak329	gene396	-0.00400729	-0.00270974	0.0108282			peak3995	peak3135	peak3995									peak1290	peak1755	peak1290										peak2410	peak6895	peak2410
peak330	gene396	-0.00826269	-0.00337444	-0.00576349			peak6140	peak1910	peak6140									peak3400	peak3939	peak3400										peak4591	peak11322	peak4591
peak331	gene396	-0.00329595	0.000656219	-0.000569716			peak612	peak11396	peak612									peak9698	peak4777	peak9698										peak11560	peak540	peak11560
peak332	gene400	0.00176498	0.00227009	0.00264879			peak5018	peak1286	peak5018									peak3684	peak2324	peak3684										peak7208	peak8577	peak7208
peak333	gene409	0.0029864	-0.00195956	0.00408332			peak3538	peak11221	peak3538									peak579	peak4580	peak579										peak4784	peak9714	peak4784
peak334	gene409	0.000179547	0.00327234	0.00792293			peak9954	peak966	peak9954									peak2443	peak11222	peak2443										peak9657	peak9296	peak9657
peak335	gene409	-0.000271034	0.00313609	-0.0036891			peak501	peak11181	peak501									peak2394	peak3308	peak2394										peak5596	peak6965	peak5596
peak336	gene409	0.00235722	0.00937956	-0.00089059			peak1486	peak8059	peak1486									peak2329	peak2226	peak2329										peak8098	peak10427	peak8098
peak337	gene409	0.00784041	-0.000206926	-0.0109132			peak2491	peak4023	peak2491									peak97	peak1485	peak97										peak8247	peak11218	peak8247
peak338	gene414	0.009761	0.00101324	-0.00833902			peak8813	peak11481	peak8813									peak296	peak11438	peak296										peak1842	peak11375	peak1842
peak339	gene415	0.00282788	-0.00351764	-0.00749746			peak10392	peak6714	peak10392									peak9798	peak11488	peak9798										peak2554	peak141	peak2554
peak340	gene418	0.00282516	0.00401442	0.00175233			peak6384	peak9837	peak6384									peak4888	peak1046	peak4888										peak4904	peak10417	peak4904
peak341	gene418	0.00519959	0.000484907	-0.0105474			peak11134	peak3122	peak11134									peak7980	peak9980	peak7980										peak6788	peak194	peak6788
peak342	gene418	0.0009444	-0.00338872	0.00790803			peak8275	peak8574	peak8275									peak8759	peak553	peak8759										peak6992	peak4366	peak6992
peak343	gene420	-0.00436139	0.00990076	-0.000986595			peak1442	peak6654	peak1442									peak4455	peak4887	peak4455										peak8464	peak1876	peak8464
peak344	gene418	0.00126132	0.00906676	-0.00134672			peak1834	peak11480	peak1834									peak7883	peak8389	peak7883										peak6757	peak3407	peak6757
peak345	gene418	-0.000763047	-0.00522586	0.0133358			peak9269	peak902	peak9269									peak2932	peak8057	peak2932										peak11364	peak168	peak11364
peak346	gene418	-0.00917893	-0.00329615	-0.00513721			peak7477	peak11423	peak7477									peak4774	peak6856	peak4774										peak4137	peak3164	peak4137
peak347	gene418	-0.00398529	0.00500916	-0.0112758			peak11379	peak11182	peak11379									peak1490	peak485	peak1490										peak1362	peak3162	peak1362
peak348	gene418	0.00691153	0.00990807	-0.00472164			peak6608	peak1091	peak6608									peak1456	peak1827	peak1456										peak11410	peak4523	peak11410
peak349	gene418	0.00358418	0.00215451	-0.0108507			peak9057	peak11519	peak9057									peak2446	peak1621	peak2446										peak9851	peak4980	peak9851
peak350	gene426	0.00509807	-0.00367819	-0.000920757			peak3500	peak11478	peak3500									peak10815	peak7209	peak10815										peak2388	peak10564	peak2388
peak351	gene426	-0.00418449	-0.00389551	-0.0025772			peak9889	peak8097	peak9889									peak2299	peak3995	peak2299										peak1765	peak609	peak1765
peak352	gene426	6.9769e-05	-0.00340809	0.00195931			peak4790	peak11170	peak4790									peak1228	peak11206	peak1228										peak11083	peak2186	peak11083
peak353	gene426	0.00082107	-0.00255704	0.000765452			peak7435	peak8476	peak7435									peak4143	peak6965	peak4143										peak9363	peak7428	peak9363
peak354	gene426	-0.00086944	-0.0110282	-0.00519419			peak1331	peak11414	peak1331									peak1965	peak11435	peak1965										peak9919	peak6954	peak9919
peak355	gene426	0.00215785	0.00323899	-0.00858265			peak1971	peak6451	peak1971									peak4513	peak11405	peak4513										peak8912	peak8205	peak8912
peak356	gene428	0.0102964	-0.00726798	-0.00413238			peak5873	peak1368	peak5873									peak10006	peak3845	peak10006										peak3912	peak7124	peak3912
peak357	gene437	0.00732725	0.00219505	-0.00732831			peak8283	peak2894	peak8283									peak8207	peak11526	peak8207										peak1223	peak3565	peak1223
peak358	gene439	0.00487659	0.00643129	-0.000860629			peak8117	peak1146	peak8117									peak9878	peak9979	peak9878										peak10859	peak1748	peak10859
peak359	gene442	0.00241605	-0.0040316	0.00589971			peak2347	peak2922	peak2347									peak8962	peak3956	peak8962										peak1485	peak7167	peak1485
peak360	gene445	0.019115	-0.0115968	-0.0380684			peak6657	peak10679	peak6657									peak1497	peak7191	peak1497										peak1675	peak7053	peak1675
peak361	gene456	0.0176241	0.00437315	-0.00813912			peak6078	peak271	peak6078									peak2538	peak10978	peak2538										peak7281	peak4128	peak7281
peak362	gene463	0.00423025	-0.00462953	0.0120994			peak10033	peak11169	peak10033									peak10548	peak1629	peak10548										peak5491	peak5704	peak5491
peak363	gene464	0.0102813	-0.0120146	-0.0018659			peak7433	peak9114	peak7433									peak3735	peak3054	peak3735										peak11118	peak7645	peak11118
peak364	gene464	0.00254107	-0.00653149	0.00692096			peak8055	peak139	peak8055									peak3663	peak3340	peak3663										peak6276	peak7304	peak6276
peak365	gene463	0.0057655	-0.0108085	-0.00397084			peak2384	peak1015	peak2384									peak2328	peak2180	peak2328										peak9843	peak11341	peak9843
peak366	gene465	-0.00432111	0.0095576	-0.000586119			peak9787	peak1366	peak9787									peak3757	peak9278	peak3757										peak9645	peak2913	peak9645
peak367	gene465	0.00150363	0.00193446	0.00160648			peak8174	peak11407	peak8174									peak6582	peak9968	peak6582										peak2682	peak11373	peak2682
peak368	gene465	-0.00622417	0.00941355	-0.00841807			peak5869	peak2301	peak5869									peak10533	peak10688	peak10533										peak2164	peak1668	peak2164
peak369	gene468	0.00112441	0.00580795	-0.00146887			peak4170	peak11240	peak4170									peak6330	peak11564	peak6330										peak5790	peak11046	peak5790
peak370	gene469	0.0132379	-0.00772276	-0.00618562			peak1721	peak6332	peak1721									peak10796	peak6665	peak10796										peak7328	peak3995	peak7328
peak371	gene469	-0.0035635	0.0117601	0.00447927			peak2461	peak11215	peak2461									peak8574	peak4375	peak8574										peak933	peak8715	peak933
peak372	gene469	-0.00404828	0.00118269	-0.0044862			peak1122	peak11531	peak1122									peak10672	peak7218	peak10672										peak60	peak9938	peak60
peak373	gene470	0.00447111	-0.0125272	0.00846073			peak4731	peak8858	peak4731									peak632	peak3808	peak632										peak2150	peak8798	peak2150
peak374	gene469	-0.00247976	0.000275196	-0.00872735			peak10567	peak11306	peak10567									peak7868	peak430	peak7868										peak438	peak9231	peak438
peak375	gene470	-0.00293407	0.00725545	0.00111475			peak505	peak4863	peak505									peak2759	peak4579	peak2759										peak11163	peak5834	peak11163
peak376	gene470	0.00463742	0.0118776	-0.00266849			peak1512	peak3919	peak1512									peak7655	peak491	peak7655										peak10383	peak10407	peak10383
peak377	gene470	-0.0176877	0.00936527	-0.00762882			peak3214	peak3922	peak3214									peak9607	peak11182	peak9607										peak9439	peak2009	peak9439
peak378	gene470	-0.0123999	-0.00527567	0.0034879			peak627	peak6583	peak627									peak11092	peak11220	peak11092										peak468	peak11416	peak468
peak379	gene474	0.013123	0.00159666	-0.0135182			peak408	peak8770	peak408									peak10654	peak11234	peak10654										peak844	peak8832	peak844
peak380	gene475	0.00101874	0.00877946	0.000347164			peak9846	peak2758	peak9846									peak103	peak1282	peak103										peak915	peak1023	peak915
peak381	gene482	-0.00327079	-0.00674378	0.00545111			peak10979	peak11524	peak10979									peak5847	peak6361	peak5847										peak11586	peak1179	peak11586
peak382	gene482	-0.00153034	0.00190695	0.00194378			peak36	peak11020	peak36									peak6535	peak1503	peak6535										peak11328	peak7404	peak11328
peak383	gene485	0.00216785	-0.000578544	0.000980244			peak3118	peak9483	peak3118									peak9838	peak11594	peak9838										peak9578	peak6293	peak9578
peak384	gene487	-0.00938521	0.00796124	-0.00564735			peak4125	peak11539	peak4125									peak7561	peak4735	peak7561										peak879	peak6816	peak879
peak385	gene487	-0.00361282	0.00575814	-0.00496486			peak10083	peak7215	peak10083									peak8916	peak11528	peak8916										peak2622	peak7365	peak2622
peak386	gene487	-0.00524392	0.00218547	-0.00564104			peak10374	peak8728	peak10374									peak2738	peak5648	peak2738										peak9599	peak6842	peak9599
peak387	gene487	-0.00494335	-0.000835047	0.00336167			peak9919	peak4480	peak9919									peak6072	peak1630	peak6072										peak40	peak117	peak40
peak388	gene487	-0.0114513	0.00199153	-0.0017484			peak10449	peak6972	peak10449									peak1148	peak4784	peak1148										peak9944	peak10170	peak9944
peak389	gene487	-0.00136978	0.0028611	-0.00994337			peak7434	peak11529	peak7434									peak7721	peak2560	peak7721										peak5399	peak10889	peak5399
peak390	gene487	-0.00608238	0.0084255	-0.00214526			peak610	peak9983	peak610									peak6777	peak1505	peak6777										peak11365	peak9258	peak11365
peak391	gene487	-0.00339124	0.00276016	0.00420641			peak7164	peak9031	peak7164									peak5994	peak11257	peak5994										peak11354	peak3808	peak11354
peak392	gene487	0.00430464	-0.00370315	-0.00826937			peak9045	peak11292	peak9045									peak3042	peak5748	peak3042										peak10921	peak8844	peak10921
peak393	gene487	0.00216856	0.00366024	0.00177487			peak11493	peak6779	peak11493									peak4056	peak6164	peak4056										peak4602	peak8288	peak4602
peak394	gene487	0.00312347	-0.00486569	0.00177196			peak5584	peak3048	peak5584									peak11549	peak7386	peak11549										peak11381	peak4124	peak11381
peak395	gene487	0.00222032	0.00196809	0.0051616			peak6624	peak7250	peak6624									peak165	peak5567	peak165										peak9404	peak4846	peak9404
peak396	gene487	0.00130813	-0.0115133	0.00634487			peak11244	peak11479	peak11244									peak2044	peak11372	peak2044										peak10498	peak10577	peak10498
peak397	gene487	0.00188173	-0.000116499	0.00948062			peak10700	peak2863	peak10700									peak7856	peak4026	peak7856										peak55	peak10028	peak55
peak398	gene487	0.00436269	-0.00441675	0.0123924			peak7753	peak11263	peak7753									peak10589	peak2338	peak10589										peak2366	peak5248	peak2366
peak399	gene489	0.00870769	0.00512479	-0.00755959			peak9311	peak9853	peak9311									peak839	peak2466	peak839										peak3799	peak3475	peak3799
peak400	gene490	0.0177145	-0.0146502	-0.0143989			peak10561	peak3119	peak10561									peak5404	peak11211	peak5404										peak39	peak7801	peak39
peak401	gene492	0.00358622	-0.00733829	0.0200778			peak7689	peak11477	peak7689									peak458	peak9258	peak458										peak10325	peak10089	peak10325
peak402	gene492	0.00072824	-0.000382593	-0.0038666			peak4974	peak11247	peak4974									peak2211	peak11216	peak2211										peak1447	peak8638	peak1447
peak403	gene494	-0.00697867	0.00775738	0.00209118			peak284	peak11437	peak284									peak4563	peak309	peak4563										peak3903	peak11198	peak3903
peak404	gene492	0.000750919	-0.00141606	-0.00753406			peak10446	peak7305	peak10446									peak613	peak9982	peak613										peak2163	peak7338	peak2163
peak405	gene494	-0.00111725	0.00128821	-0.00161605			peak167	peak11220	peak167									peak6273	peak11243	peak6273										peak9401	peak10788	peak9401
peak406	gene495	0.00924617	0.00174896	0.0110874			peak8434	peak11486	peak8434									peak2915	peak8964	peak2915										peak11203	peak3602	peak11203
peak407	gene492	-0.00117818	0.00345974	0.00195372			peak3018	peak9683	peak3018									peak6480	peak4782	peak6480										peak3325	peak7364	peak3325
peak408	gene496	0.0138712	-0.0057207	-0.00657423			peak8138	peak10710	peak8138									peak7670	peak4731	peak7670										peak11110	peak7050	peak11110
peak409	gene506	0.0124621	-0.0158178	-0.0190071			peak9935	peak3907	peak9935									peak1368	peak6310	peak1368										peak11208	peak6165	peak11208
peak410	gene503	0.00427011	-0.00734491	-0.0107194			peak6135	peak3570	peak6135									peak6040	peak11584	peak6040										peak8164	peak7799	peak8164
peak411	gene503	0.0066337	-0.00717227	0.00254484			peak3782	peak8768	peak3782									peak4955	peak2316	peak4955										peak1755	peak7342	peak1755
peak412	gene507	-0.00257299	0.0117302	-0.00693646			peak6842	peak6605	peak6842									peak6654	peak4550	peak6654										peak6686	peak8659	peak6686
peak413	gene507	-0.00293456	0.00253049	-0.00871131			peak6484	peak2216	peak6484									peak8045	peak11195	peak8045										peak6361	peak9590	peak6361
peak414	gene507	-0.00191815	0.00168466	0.00667584			peak9096	peak5397	peak9096									peak7307	peak11472	peak7307										peak2648	peak2180	peak2648
peak415	gene508	0.00569026	-0.00587524	-0.00359573			peak5945	peak1435	peak5945									peak4239	peak6014	peak4239										peak3870	peak5335	peak3870
peak416	gene509	-0.00572983	0.00017915	-0.00324361			peak1135	peak5388	peak1135									peak9671	peak11147	peak9671										peak5592	peak7786	peak5592
peak417	gene509	-0.0191072	-0.000254887	-0.00616882			peak9731	peak7851	peak9731									peak6029	peak8873	peak6029										peak3860	peak2707	peak3860
peak418	gene509	-0.00115908	-0.00256251	0.00981167			peak969	peak6137	peak969									peak1183	peak8053	peak1183										peak5589	peak2916	peak5589
peak419	gene509	-0.00303795	-0.00309888	0.0128052			peak4865	peak5404	peak4865									peak6563	peak11259	peak6563										peak5067	peak4469	peak5067
peak420	gene510	-0.00322607	0.00056013	0.0103416			peak4093	peak8063	peak4093									peak5071	peak9026	peak5071										peak7455	peak5748	peak7455
peak421	gene510	0.0194869	-0.00574032	0.0142361			peak10424	peak3055	peak10424									peak1337	peak1617	peak1337										peak211	peak7252	peak211
peak422	gene510	-0.00825031	0.0119233	0.00251105			peak1703	peak2714	peak1703									peak3379	peak1610	peak3379										peak1103	peak2143	peak1103
peak423	gene510	-0.0167992	0.0225337	-0.0124548			peak4660	peak11260	peak4660									peak10406	peak6909	peak10406										peak9173	peak1947	peak9173
peak424	gene517	-0.00802797	0.00135653	-0.000342809			peak2576	peak5294	peak2576									peak9518	peak3902	peak9518										peak9548	peak167	peak9548
peak425	gene517	-0.00974573	-0.00369548	-0.00673028			peak3998	peak8270	peak3998									peak5617	peak11218	peak5617										peak5594	peak7386	peak5594
peak426	gene520	0.0116615	-0.0173137	0.0114199			peak10525	peak8150	peak10525									peak5410	peak9934	peak5410										peak6526	peak756	peak6526
peak427	gene517	0.00465548	-0.0103679	-0.0206945			peak8294	peak460	peak8294									peak5682	peak643	peak5682										peak6705	peak8903	peak6705
peak428	gene520	0.00029771	-0.00109349	-0.0034944			peak1695	peak8598	peak1695									peak8587	peak11307	peak8587										peak2662	peak10105	peak2662
peak429	gene520	-0.00875012	0.0119796	-0.0113288			peak10869	peak6183	peak10869									peak2207	peak6870	peak2207										peak3348	peak5234	peak3348
peak430	gene528	0.0173976	-0.0218861	0.0095747			peak11086	peak6167	peak11086									peak9749	peak313	peak9749										peak9422	peak8900	peak9422
peak431	gene526	0.0113417	-0.0128027	-0.0194644			peak9079	peak5205	peak9079									peak11312	peak11522	peak11312										peak9431	peak10600	peak9431
peak432	gene529	0.00475286	-0.00343045	0.0095379			peak7502	peak11413	peak7502									peak5812	peak756	peak5812										peak1340	peak2897	peak1340
peak433	gene529	-0.000767729	0.00358655	0.00510773			peak8836	peak9931	peak8836									peak9866	peak1575	peak9866										peak451	peak3053	peak451
peak434	gene529	-0.00399017	-0.00469554	-0.00368205			peak4695	peak6777	peak4695									peak511	peak8054	peak511										peak2301	peak10147	peak2301
peak435	gene530	-0.00793897	0.00181082	-0.000546458			peak3072	peak8397	peak3072									peak557	peak11236	peak557										peak9658	peak8450	peak9658
peak436	gene530	0.00922054	0.00646062	-0.0145555			peak4327	peak11395	peak4327									peak189	peak1451	peak189										peak3908	peak5588	peak3908
peak437	gene529	-0.010463	0.000534634	-0.0035642			peak4012	peak9698	peak4012									peak9853	peak6924	peak9853										peak421	peak1910	peak421
peak438	gene529	-0.00398114	0.000473266	0.0151541			peak4328	peak4339	peak4328									peak9543	peak2397	peak9543										peak10486	peak7586	peak10486
peak439	gene529	0.0128222	-0.0156567	0.025718			peak5649	peak10088	peak5649									peak6837	peak1611	peak6837										peak3900	peak9879	peak3900
peak440	gene529	-0.000331938	-0.00535582	0.0103083			peak872	peak10372	peak872									peak4633	peak11378	peak4633										peak2620	peak6343	peak2620
peak441	gene529	0.00240698	-0.00451777	0.00656259			peak597	peak4215	peak597									peak7520	peak2467	peak7520										peak541	peak4390	peak541
peak442	gene529	0.001396	-0.00670671	0.0117492			peak8857	peak11526	peak8857									peak193	peak3896	peak193										peak9984	peak3505	peak9984
peak443	gene529	-0.00146977	0.000193353	0.016788			peak370	peak11222	peak370									peak6530	peak2172	peak6530										peak8194	peak4437	peak8194
peak444	gene529	-0.00619051	-0.00257456	0.00321594			peak5583	peak1126	peak5583									peak8154	peak4577	peak8154										peak7203	peak10065	peak7203
peak445	gene529	-0.0111055	0.00960372	-0.000742382			peak7897	peak2835	peak7897									peak635	peak11244	peak635										peak4516	peak6892	peak4516
peak446	gene529	-0.00381566	0.00858022	0.00284794			peak1836	peak9654	peak1836									peak1982	peak8834	peak1982										peak6651	peak8574	peak6651
peak447	gene531	0.007721	0.00139144	0.00300359			peak487	peak277	peak487									peak2039	peak3371	peak2039										peak1191	peak11474	peak1191
peak448	gene532	0.0105218	-0.0052859	-0.00694645			peak7749	peak10574	peak7749									peak3515	peak9484	peak3515										peak10609	peak9814	peak10609
peak449	gene534	0.00698669	-0.00355277	-0.00397621			peak2741	peak7191	peak2741									peak6464	peak11573	peak6464										peak51	peak2313	peak51
peak450	gene538	0.00584281	0.000201683	0.00918159			peak2983	peak4014	peak2983									peak5059	peak1082	peak5059										peak10485	peak1993	peak10485
peak451	gene539	0.00838408	0.00335279	0.0142665			peak9503	peak675	peak9503									peak1424	peak11402	peak1424										peak927	peak9185	peak927
peak452	gene539	-0.00602332	0.00983797	8.96232e-05			peak4975	peak11400	peak4975									peak2269	peak8238	peak2269										peak4208	peak178	peak4208
peak453	gene539	0.00442984	0.00485731	0.00808722			peak2096	peak5862	peak2096									peak3228	peak1795	peak3228										peak9399	peak10316	peak9399
peak454	gene541	0.0127415	-0.0055083	-0.0042411			peak2273	peak10812	peak2273									peak6545	peak9546	peak6545										peak9079	peak9616	peak9079
peak455	gene542	-0.00201495	0.00704314	0.00148816			peak7964	peak1302	peak7964									peak9931	peak3050	peak9931										peak1819	peak10182	peak1819
peak456	gene542	-0.00532336	-0.0204938	0.0290185			peak1826	peak2599	peak1826									peak216	peak7211	peak216										peak11245	peak8570	peak11245
peak457	gene542	0.0151993	-0.011295	0.0255732			peak379	peak9866	peak379									peak10910	peak3853	peak10910										peak6713	peak10806	peak6713
peak458	gene542	-0.00729879	0.0148347	-0.00230559			peak2510	peak1090	peak2510									peak4082	peak2184	peak4082										peak10488	peak10657	peak10488
peak459	gene542	-0.00492436	-0.00329623	0.0162836			peak4836	peak11301	peak4836									peak4555	peak11258	peak4555										peak3344	peak10927	peak3344
peak460	gene542	-0.0238835	-0.0108813	0.00165414			peak9905	peak3758	peak9905									peak2746	peak9020	peak2746										peak11409	peak5401	peak11409
peak461	gene542	0.000235355	-0.00171449	0.00929105			peak4417	peak11177	peak4417									peak10581	peak11459	peak10581										peak8837	peak3553	peak8837
peak462	gene542	-0.0163778	0.00241887	-0.0135405			peak6922	peak5383	peak6922									peak746	peak3022	peak746										peak9841	peak8235	peak9841
peak463	gene542	-0.000371616	0.00876638	0.00334985			peak9039	peak11422	peak9039									peak73	peak4618	peak73										peak2684	peak8598	peak2684
peak464	gene549	0.0042621	-0.0120005	-1.40707e-05			peak5877	peak3049	peak5877									peak8426	peak11409	peak8426										peak161	peak9167	peak161
peak465	gene550	0.0049591	-0.00650071	0.00328625			peak8032	peak11581	peak8032									peak8061	peak8051	peak8061										peak2616	peak6098	peak2616
peak466	gene550	-0.00101773	-0.00172962	0.0119073			peak9676	peak3021	peak9676									peak8044	peak11238	peak8044										peak4691	peak4026	peak4691
peak467	gene550	0.00188667	0.00271992	0.00923785			peak5821	peak6028	peak5821									peak2107	peak9829	peak2107										peak3340	peak8584	peak3340
peak468	gene550	0.00110681	0.000201565	0.0151228			peak4167	peak11406	peak4167									peak5862	peak4569	peak5862										peak8055	peak3056	peak8055
peak469	gene553	-0.0032641	-0.00422342	0.00602091			peak7827	peak11534	peak7827									peak7180	peak11069	peak7180										peak5722	peak1421	peak5722
peak470	gene553	-0.000688831	0.0030271	0.00253733			peak9043	peak6318	peak9043									peak8157	peak7217	peak8157										peak1448	peak2945	peak1448
peak471	gene550	-0.00551354	-0.00426193	0.0108587			peak9290	peak958	peak9290									peak11466	peak9483	peak11466										peak11393	peak2914	peak11393
peak472	gene550	0.0093536	-0.00397522	0.00876458			peak6814	peak6753	peak6814									peak9305	peak1571	peak9305										peak3317	peak7671	peak3317
peak473	gene550	0.00471847	-0.00944042	0.0116881			peak2647	peak4563	peak2647									peak7138	peak11474	peak7138										peak4066	peak3230	peak4066
peak474	gene550	0.0241314	-0.00469387	0.0289292			peak141	peak3901	peak141									peak2284	peak1604	peak2284										peak4912	peak11503	peak4912
peak475	gene550	-0.0047057	-0.00283792	-0.000838839			peak9559	peak4493	peak9559									peak1938	peak11237	peak1938										peak11587	peak249	peak11587
peak476	gene550	-0.0034751	-0.00510052	0.0112055			peak10601	peak9653	peak10601									peak5534	peak9038	peak5534										peak6652	peak7513	peak6652
peak477	gene550	-0.00420817	-0.0018724	0.00341976			peak4875	peak11393	peak4875									peak9354	peak1563	peak9354										peak9698	peak2345	peak9698
peak478	gene550	-0.0194149	0.0127452	0.00744689			peak9271	peak7302	peak9271									peak5115	peak2185	peak5115										peak3719	peak9856	peak3719
peak479	gene550	0.00384703	-0.00144995	0.0103705			peak5833	peak1053	peak5833									peak5348	peak3374	peak5348										peak3939	peak11069	peak3939
peak480	gene550	-0.00762179	-3.00615e-05	0.00483227			peak8443	peak11392	peak8443									peak2747	peak6736	peak2747										peak5593	peak5567	peak5593
peak481	gene550	0.00468688	-0.00156598	0.0159382			peak3930	peak1418	peak3930									peak763	peak6660	peak763										peak931	peak1124	peak931
peak482	gene550	-0.00880618	-0.000333208	0.0109706			peak5651	peak1561	peak5651									peak4298	peak902	peak4298										peak10608	peak8138	peak10608
peak483	gene550	0.00141969	-0.00464417	0.00831657			peak1184	peak11304	peak1184									peak7253	peak8981	peak7253										peak10815	peak4062	peak10815
peak484	gene550	-0.0112275	-0.00440935	-0.00538594			peak5874	peak942	peak5874									peak1080	peak9656	peak1080										peak9928	peak34	peak9928
peak485	gene550	-0.00436711	-0.0211249	-0.00632072			peak77	peak270	peak77									peak2808	peak2223	peak2808										peak11397	peak2092	peak11397
peak486	gene559	0.0126209	-0.010745	0.0130809			peak4072	peak11440	peak4072									peak1034	peak9965	peak1034										peak9150	peak11008	peak9150
peak487	gene561	0.0131946	-0.00306582	-0.00193432			peak1518	peak2171	peak1518									peak3238	peak9899	peak3238										peak1807	peak3597	peak1807
peak488	gene563	0.00191899	-0.00324132	-0.00638841			peak11339	peak11213	peak11339									peak1980	peak199	peak1980										peak6961	peak10863	peak6961
peak489	gene565	0.0118054	0.000560208	-0.0142326			peak9335	peak2407	peak9335									peak10497	peak9421	peak10497										peak8897	peak4979	peak8897
peak490	gene566	0.00769549	0.000488145	-3.06529e-06			peak3417	peak140	peak3417									peak10704	peak11362	peak10704										peak1923	peak6105	peak1923
peak491	gene568	0.0222139	-0.021926	-0.0159164			peak107	peak514	peak107									peak1768	peak310	peak1768										peak1867	peak10560	peak1867
peak492	gene571	-0.000850155	-0.00619698	-0.00971823			peak3857	peak8835	peak3857									peak7643	peak11397	peak7643										peak5564	peak6310	peak5564
peak493	gene575	0.0063369	0.00260212	-0.0026548			peak816	peak11123	peak816									peak8521	peak2720	peak8521										peak1365	peak10993	peak1365
peak494	gene578	0.0118276	-0.00322104	-0.0125297			peak7476	peak11305	peak7476									peak9502	peak8182	peak9502										peak1892	peak4711	peak1892
peak495	gene579	0.00372273	-0.00397455	-0.00622248			peak6233	peak6031	peak6233									peak7725	peak2474	peak7725										peak4680	peak6484	peak4680
peak496	gene580	0.00321478	-0.000398524	0.00430091			peak1180	peak1365	peak1180									peak2216	peak2346	peak2216										peak5820	peak1120	peak5820
peak497	gene580	-0.000303172	0.00438382	0.00578451			peak8871	peak3984	peak8871									peak9887	peak11595	peak9887										peak7134	peak7613	peak7134
peak498	gene581	-0.0103122	-0.00166209	-0.00278348			peak7387	peak7214	peak7387									peak3425	peak1	peak3425										peak7881	peak568	peak7881
peak499	gene582	0.00834799	-0.00501275	0.00167345			peak439	peak6276	peak439									peak5497	peak11305	peak5497										peak9811	peak10227	peak9811
peak500	gene583	0.00331426	-0.00456606	0.00168785			peak7436	peak11097	peak7436									peak9180	peak860	peak9180										peak1548	peak8744	peak1548
peak501	gene585	0.0143509	-0.00815363	-0.0172763			peak10956	peak9658	peak10956									peak4900	peak2177	peak4900										peak960	peak1497	peak960
peak502	gene590	-0.00487098	0.000183836	-0.000235012			peak7369	peak11600	peak7369									peak3672	peak7213	peak3672										peak11596	peak6873	peak11596
peak503	gene591	0.00703498	0.00108123	0.00301556			peak9593	peak5573	peak9593									peak2676	peak6929	peak2676										peak1953	peak3726	peak1953
peak504	gene592	0.00397887	3.68251e-06	0.00369074			peak454	peak4987	peak454									peak2791	peak7237	peak2791										peak11496	peak8485	peak11496
peak505	gene592	0.0139014	0.0019625	0.00261172			peak6769	peak8985	peak6769									peak3179	peak1592	peak3179										peak4768	peak1631	peak4768
peak506	gene593	0.000263901	-0.00154771	0.00737723			peak3194	peak6746	peak3194									peak7854	peak7190	peak7854										peak1334	peak10128	peak1334
peak507	gene593	-0.00116769	-0.0087167	0.00228001			peak4073	peak5510	peak4073									peak9523	peak4300	peak9523										peak2316	peak4669	peak2316
peak508	gene591	0.00710307	-0.00474615	0.00131908			peak10577	peak6641	peak10577									peak1240	peak2171	peak1240										peak9738	peak2719	peak9738
peak509	gene594	0.00558709	0.00145384	-0.00588981			peak6141	peak11206	peak6141									peak9689	peak11240	peak9689										peak8966	peak9279	peak8966
peak510	gene595	-0.00448029	0.00474665	0.0103756			peak1120	peak10185	peak1120									peak8055	peak11538	peak8055										peak7278	peak9157	peak7278
peak511	gene595	-0.0159635	0.014521	-0.0132286			peak4233	peak6675	peak4233									peak3673	peak11436	peak3673										peak4142	peak892	peak4142
peak512	gene602	-0.00250861	-0.00612888	-0.000985032			peak11035	peak8991	peak11035									peak9573	peak11376	peak9573										peak934	peak5749	peak934
peak513	gene603	-0.0185879	0.0116819	0.00393182			peak880	peak11211	peak880									peak1382	peak9548	peak1382										peak4569	peak9267	peak4569
peak514	gene603	-0.0272088	0.0164349	0.00280121			peak3997	peak1719	peak3997									peak1035	peak9257	peak1035										peak9241	peak7528	peak9241
peak515	NA	0.000941118	-0.00869379	0.00779952			peak716	peak10810	peak716									peak3171	peak143	peak3171										peak4628	peak9026	peak4628
peak516	NA	-0.0176954	-0.0105727	-0.00637944			peak4555	peak8218	peak4555									peak8753	peak11375	peak8753										peak5806	peak5191	peak5806
peak517	NA	-0.000139059	-0.0145369	0.00987507			peak3344	peak9810	peak3344									peak10666	peak1597	peak10666										peak9215	peak9259	peak9215
peak518	gene605	-0.00511703	0.0012551	0.00656466			peak8840	peak3120	peak8840									peak5560	peak1506	peak5560										peak10499	peak2010	peak10499
peak519	gene608	0.00198925	-0.0153992	0.00452135			peak1231	peak7239	peak1231									peak10994	peak11173	peak10994										peak11396	peak11551	peak11396
peak520	gene609	0.00401209	-0.00266167	-0.00936271			peak486	peak10991	peak486									peak1744	peak2173	peak1744										peak1630	peak4495	peak1630
peak521	gene610	0.000959011	0.00313478	-0.000998612			peak5907	peak11488	peak5907									peak10611	peak8768	peak10611										peak7320	peak6746	peak7320
peak522	gene610	0.00971098	-0.00100964	0.0227497			peak1619	peak2437	peak1619									peak11247	peak7212	peak11247										peak8254	peak9877	peak8254
peak523	gene610	-0.00709786	-0.00108657	0.00175641			peak2272	peak11485	peak2272									peak2558	peak9655	peak2558										peak9214	peak10996	peak9214
peak524	gene610	0.000201212	0.00860679	0.00499478			peak10031	peak6666	peak10031									peak8153	peak11363	peak8153										peak1905	peak1674	peak1905
peak525	gene610	-0.00503122	0.00340129	0.00135151			peak6313	peak6655	peak6313									peak7594	peak2186	peak7594										peak10185	peak7215	peak10185
peak526	gene610	-0.00517244	0.00341993	0.00412136			peak5121	peak11487	peak5121									peak2757	peak1124	peak2757										peak5933	peak604	peak5933
peak527	gene610	-0.0075494	0.0036568	0.00726438			peak5010	peak7961	peak5010									peak9740	peak9545	peak9740										peak9696	peak8587	peak9696
peak528	gene610	-0.00773531	-0.00372923	0.00399834			peak11068	peak2819	peak11068									peak3881	peak2174	peak3881										peak8889	peak6294	peak8889
peak529	gene610	9.37803e-05	0.00447658	0.0052214			peak2580	peak2247	peak2580									peak4989	peak943	peak4989										peak9020	peak5893	peak9020
peak530	gene610	-0.00464148	0.000754076	0.0096285			peak8505	peak670	peak8505									peak4843	peak1093	peak4843										peak345	peak11147	peak345
peak531	gene610	0.00115863	-0.000277424	0.00884776			peak7878	peak8981	peak7878									peak10496	peak9969	peak10496										peak3931	peak10636	peak3931
peak532	gene610	-0.00253704	-0.000792524	0.00675337			peak1630	peak8655	peak1630									peak634	peak11223	peak634										peak11	peak8182	peak11
peak533	gene610	-0.00621242	-0.00526843	0.00263756			peak5964	peak11178	peak5964									peak1098	peak1053	peak1098										peak3806	peak1844	peak3806
peak534	gene613	-0.00901173	0.00066051	-0.00785092			peak3823	peak10488	peak3823									peak7782	peak5034	peak7782										peak3310	peak11187	peak3310
peak535	gene613	-0.00911802	-0.00749568	0.0045818			peak1595	peak11603	peak1595									peak8905	peak1092	peak8905										peak9495	peak170	peak9495
peak536	gene613	0.00585213	-0.0037809	-0.000408156			peak409	peak7960	peak409									peak4500	peak9983	peak4500										peak8079	peak11257	peak8079
peak537	gene610	0.00168668	0.00690479	0.0039213			peak5578	peak10097	peak5578									peak9597	peak9259	peak9597										peak2408	peak1795	peak2408
peak538	gene614	-0.000215536	0.00573158	0.00152429			peak10015	peak11397	peak10015									peak4715	peak8985	peak4715										peak10911	peak11041	peak10911
peak539	gene616	0.00597717	-0.00161247	-0.0116077			peak5217	peak10811	peak5217									peak4493	peak3851	peak4493										peak5731	peak10420	peak5731
peak540	gene619	-0.00146145	0.001617	-0.0209239			peak641	peak7963	peak641									peak10592	peak11183	peak10592										peak700	peak9039	peak700
peak541	gene624	-0.00132341	0.00196309	0.0141613			peak5839	peak11601	peak5839									peak2218	peak5612	peak2218										peak11168	peak943	peak11168
peak542	gene626	2.82628e-05	0.00822796	-0.0108733			peak9140	peak8986	peak9140									peak2900	peak9654	peak2900										peak11209	peak10561	peak11209
peak543	gene630	0.000849296	-0.007418	-0.012364			peak8202	peak11584	peak8202									peak217	peak5893	peak217										peak3390	peak6608	peak3390
peak544	gene637	0.00132334	0.00560894	-0.00674922			peak7385	peak11404	peak7385									peak9773	peak9485	peak9773										peak5860	peak1545	peak5860
peak545	gene647	0.0116431	-0.00476399	-0.0314443			peak9714	peak11223	peak9714									peak7510	peak861	peak7510										peak10396	peak5372	peak10396
peak546	gene647	-0.00112561	0.00996081	-0.00238075			peak4326	peak7006	peak4326									peak10633	peak11233	peak10633										peak1805	peak1256	peak1805
peak547	gene655	-0.00287328	-0.00398562	-0.00433931			peak7525	peak11409	peak7525									peak8803	peak7960	peak8803										peak1781	peak1546	peak1781
peak548	gene666	-0.00126504	0.00560225	-0.00322211			peak1223	peak10040	peak1223									peak5057	peak7961	peak5057										peak2222	peak11202	peak2222
peak549	gene668	0.0091523	-0.00256126	0.000233557			peak9904	peak1598	peak9904									peak4322	peak1090	peak4322										peak901	peak3065	peak901
peak550	gene667	0.00378563	-0.00491853	-0.00138571			peak7071	peak7962	peak7071									peak222	peak9653	peak222										peak5859	peak7251	peak5859
peak551	gene669	0.0028197	0.00773811	-0.00344739			peak7641	peak9020	peak7641									peak4889	peak3901	peak4889										peak9734	peak4586	peak9734
peak552	gene668	0.0120901	-0.00821847	-0.00935063			peak6264	peak11198	peak6264									peak10724	peak7215	peak10724										peak4482	peak4375	peak4482
peak553	gene670	0.00666162	-0.0209595	-0.0197054			peak9970	peak7590	peak9970									peak6258	peak8986	peak6258										peak10922	peak5163	peak10922
peak554	gene670	0.00776254	-0.0141807	-0.0119372			peak7341	peak10486	peak7341									peak6546	peak892	peak6546										peak4014	peak10554	peak4014
peak555	gene672	-0.00210878	0.00911845	-0.00530125			peak3640	peak11538	peak3640									peak6448	peak1125	peak6448										peak6684	peak8238	peak6684
peak556	gene672	0.00145177	0.00946956	-0.0119984			peak9300	peak11233	peak9300									peak1399	peak7962	peak1399										peak5785	peak3853	peak5785
peak557	gene672	-0.00932337	0.0145005	-0.00765			peak4414	peak11405	peak4414									peak10689	peak1091	peak10689										peak486	peak6314	peak486
peak558	gene674	0.00319616	-0.00465173	-0.00493329			peak5164	peak8053	peak5164									peak2893	peak2228	peak2893										peak8149	peak7540	peak8149
peak559	gene675	-0.00395494	-0.00523798	0.00320202			peak5563	peak9852	peak5563									peak1978	peak2407	peak1978										peak9765	peak545	peak9765
peak560	gene676	-0.00326529	7.52093e-05	0.00132557			peak9443	peak7364	peak9443									peak6058	peak11521	peak6058										peak7218	peak6381	peak7218
peak561	gene676	-0.00596276	0.00645548	-0.0110641			peak5699	peak11595	peak5699									peak8861	peak11190	peak8861										peak9503	peak4281	peak9503
peak562	gene676	-0.00766332	0.00249342	-0.00587522			peak6740	peak11402	peak6740									peak2099	peak7239	peak2099										peak4101	peak5213	peak4101
peak563	gene676	-0.0151166	-0.000814139	-0.00781239			peak2669	peak9485	peak2669									peak5489	peak7963	peak5489										peak10321	peak999	peak10321
peak564	gene676	0.000738939	-0.00106892	0.00374984			peak7899	peak7216	peak7899									peak9384	peak7590	peak9384										peak3138	peak3054	peak3138
peak565	gene677	0.00367597	0.00442825	-0.00108859			peak2999	peak943	peak2999									peak11315	peak213	peak11315										peak6004	peak2720	peak6004
peak566	gene679	0.0044085	0.0058169	0.00840324			peak4294	peak1124	peak4294									peak302	peak9855	peak302										peak9624	peak1494	peak9624
peak567	gene679	-0.00500673	-0.00360073	-0.00540158			peak6924	peak7365	peak6924									peak158	peak7214	peak158										peak8983	peak11177	peak8983
peak568	gene679	-0.000463473	0.000578517	-0.0254418			peak1930	peak10489	peak1930									peak9699	peak8835	peak9699										peak3958	peak11305	peak3958
peak569	NA	-0.012952	0.0166295	0.00340352			peak972	peak892	peak972									peak2882	peak10486	peak2882										peak9237	peak5209	peak9237
peak570	gene684	0.00364408	-0.00176677	-0.00206556			peak4027	peak10485	peak4027									peak9493	peak10488	peak9493										peak949	peak1082	peak949
peak571	gene687	-0.00547648	0.00778196	-0.00769639			peak9860	peak5612	peak9860									peak8890	peak7216	peak8890										peak6982	peak6736	peak6982
peak572	gene690	0.00809599	0.000948257	-0.00222919			peak7874	peak1125	peak7874									peak10991	peak10489	peak10991										peak7180	peak2184	peak7180
peak573	gene689	0.0120875	-0.00987745	-0.00656271			peak2405	peak9855	peak2405									peak3030	peak10485	peak3030										peak7224	peak11178	peak7224
peak574	gene694	0.00116573	-0.00134142	0.00427448			peak7402	peak10487	peak7402									peak7682	peak8963	peak7682										peak9943	peak7946	peak9943
peak575	gene694	0.0022912	-0.00252666	0.00376401			peak9340	peak8963	peak9340									peak4958	peak10723	peak4958										peak9583	peak8115	peak9583
peak576	gene696	0.00400061	-0.00303103	-0.00721335			peak5325	peak11190	peak5325									peak10474	peak8115	peak10474										peak9426	peak6642	peak9426
peak577	gene695	0.0027614	0.00259383	-0.0049161			peak9261	peak8854	peak9261									peak5163	peak8854	peak5163										peak10324	peak360	peak10324
peak578	gene698	0.00767886	-0.000198881	0.000907675			peak2661	peak10723	peak2661									peak7846	peak10487	peak7846										peak72	peak3851	peak72
peak579	gene700	0.000390726	0.01574	-0.00785646			peak10018	peak6393	peak10018									peak8440	peak6393	peak8440										peak1706	peak10802	peak1706
peak580	gene700	-0.00570962	0.00241936	-6.17684e-06			peak3913	peak11095	peak3913									peak8991	peak1388	peak8991										peak6655	peak10213	peak6655
peak581	gene707	0.00818638	-0.00212442	-0.00673737			peak836	peak1388	peak836									peak7694	peak11095	peak7694										peak868	peak1617	peak868
peak582	gene708	0.0104709	-0.00222024	-0.00982007					peak3829											peak5651												peak2851
peak583	gene708	0.00944301	0.00214596	0.00424858					peak11232											peak6434												peak7749
peak584	gene709	0.00957842	-0.00232606	-0.00486103					peak11262											peak9641												peak2974
peak585	gene710	0.00135486	0.00319918	0.000341643					peak3729											peak8080												peak8936
peak586	gene710	-0.00172578	0.0118273	-0.005646					peak3550											peak4718												peak10433
peak587	gene710	0.00240337	0.0047618	-0.00704508					peak2143											peak4060												peak7450
peak588	gene710	0.0020203	0.0044474	-0.0122					peak2343											peak400												peak8872
peak589	gene710	0.000684716	0.00466726	-0.00706155					peak11234											peak4118												peak10592
peak590	gene710	0.000872988	0.00340399	-0.00541644					peak8178											peak1045												peak11274
peak591	gene715	-0.00868339	0.00914782	-0.0132483					peak4931											peak11299												peak3486
peak592	gene722	0.0169451	-0.0099721	-0.00829421					peak10343											peak9160												peak4048
peak593	gene722	0.00394101	0.00495956	0.00377514					peak11521											peak11262												peak10553
peak594	gene722	-0.00655535	-0.00348502	-0.00270308					peak2010											peak7433												peak3732
peak595	gene722	-0.00478586	0.0185893	-0.00318442					peak11408											peak8420												peak8661
peak596	gene728	0.00733088	0.01038	-0.0142081					peak7515											peak9737												peak5584
peak597	gene739	0.013265	-0.00125876	-0.00581585					peak8729											peak4140												peak5661
peak598	gene739	0.00745041	-0.00201165	0.00113752					peak11081											peak3913												peak6827
peak599	gene744	0.00671106	0.00399249	-0.0086935					peak10006											peak1522												peak5868
peak600	gene747	0.0182798	-7.71333e-05	-0.0036913					peak11425											peak4593												peak9995
peak601	gene750	-0.00258843	0.000861675	-0.0196684					peak9542											peak7030												peak4092
peak602	gene754	0.0085231	-0.00196023	-0.000207802					peak4569											peak2508												peak5034
peak603	gene755	0.0087747	-0.00176363	-0.00297382					peak11456											peak4980												peak4170
peak604	gene758	-0.00998281	0.000253314	-0.0274526					peak6558											peak854												peak8078
peak605	gene759	0.0120031	0.000411644	0.00608325					peak4388											peak2384												peak5523
peak606	gene759	0.0193755	-0.00306977	-0.0072494					peak8964											peak4653												peak9757
peak607	gene772	-0.0085326	0.0104844	-0.0066782					peak5212											peak884												peak2427
peak608	gene778	0.0156963	-0.00594549	-0.00190024					peak8833											peak3503												peak8599
peak609	gene782	0.0175682	-0.00906033	-0.0212306					peak11243											peak2189												peak8006
peak610	gene786	0.013753	0.0102036	0.00313631					peak11214											peak8143												peak5613
peak611	gene785	0.0078803	-0.00112858	0.00419551					peak1498											peak7874												peak7460
peak612	gene785	0.0144378	-0.0175529	-0.016059					peak9929											peak8978												peak8130
peak613	gene790	-0.00841451	0.0148103	-0.00718999					peak4469											peak11392												peak2412
peak614	gene792	-0.00634075	-0.0118418	-0.013698					peak11084											peak8696												peak8593
peak615	gene791	-0.00530512	-0.00143278	0.00302656					peak8079											peak1127												peak7010
peak616	gene792	-0.00541742	0.00174345	0.0032646					peak11370											peak10867												peak10062
peak617	gene793	-0.00207859	0.00228388	-0.00660522					peak5139											peak8085												peak2099
peak618	gene792	0.00308365	-0.00170176	0.00107619					peak8846											peak1671												peak6706
peak619	gene792	-0.00462556	0.0043815	-0.0041391					peak511											peak5075												peak295
peak620	gene792	0.00293606	-0.00643762	-0.00185397					peak11605											peak9140												peak3454
peak621	gene795	-0.00267627	0.00687452	-0.00247068					peak8956											peak3289												peak9260
peak622	gene792	0.00564909	0.00232805	0.00357491					peak11588											peak8591												peak5646
peak623	gene797	-0.0108748	0.00514993	-0.00362215					peak6993											peak1270												peak10558
peak624	gene797	0.00575822	0.00455112	0.00270048					peak3551											peak6934												peak4229
peak625	gene797	0.00401761	0.005093	-0.00347276					peak2253											peak7110												peak10555
peak626	gene799	0.00427219	0.00556994	-0.00610629					peak10750											peak7102												peak9255
peak627	gene799	0.013875	-0.0125115	-0.00885472					peak166											peak11356												peak8354
peak628	gene800	0.00801994	0.00242752	-0.000178236					peak7925											peak6218												peak10790
peak629	gene800	-0.00902288	-0.00627099	-0.0155378					peak1337											peak11306												peak4044
peak630	gene806	0.00754003	0.00851347	-0.0149375					peak6973											peak6403												peak6368
peak631	gene808	-0.00222583	0.010769	-0.00651904					peak8089											peak836												peak2927
peak632	gene808	0.00823641	0.0152385	-0.00522085					peak6897											peak8707												peak6204
peak633	gene808	-0.00161576	0.0098916	-0.00215235					peak10809											peak6436												peak2792
peak634	gene808	-0.00683597	0.013424	-0.00870268					peak7135											peak8529												peak4869
peak635	gene808	-0.00299858	0.0144053	-0.00362122					peak3747											peak9889												peak793
peak636	gene809	-0.00338169	0.011134	0.000763422					peak11577											peak7355												peak8874
peak637	gene808	0.003839	0.00156847	0.0122896					peak11363											peak3342												peak1704
peak638	gene808	-0.00221947	0.0087653	0.00169358					peak677											peak1750												peak9299
peak639	gene810	0.0109208	0.000356206	0.00264888					peak787											peak9300												peak3110
peak640	gene811	0.00973481	-0.000274982	0.00157371					peak3003											peak11341												peak8971
peak641	gene812	0.0124014	-0.00657243	-0.00812601					peak4953											peak1433												peak3243
peak642	gene814	0.00110836	-0.00383081	-0.0205931					peak8424											peak9919												peak10732
peak643	gene820	0.0226437	-0.0238198	-0.0100783					peak7152											peak4072												peak995
peak644	gene822	0.00667313	-0.000135697	0.00713278					peak2542											peak8633												peak835
peak645	gene820	0.00063231	0.00446721	0.00254679					peak11311											peak2296												peak6537
peak646	gene820	0.00431569	-0.00952896	-0.0122596					peak3298											peak7283												peak4403
peak647	gene824	0.00766134	0.00576628	0.00527912					peak11297											peak8572												peak10090
peak648	gene823	0.0055731	-0.00131442	-0.0104616					peak6400											peak6264												peak501
peak649	gene829	0.00344979	0.00819032	0.00338114					peak2843											peak11367												peak4023
peak650	gene831	0.00659536	-0.00683614	0.00984853					peak733											peak3816												peak10701
peak651	gene831	0.00374135	-0.0024459	0.00386506					peak2725											peak5735												peak2126
peak652	gene831	-0.000939894	0.0026636	-0.00278338					peak3678											peak8188												peak11055
peak653	gene836	-0.000688907	-0.00416757	0.0102198					peak10435											peak4047												peak8750
peak654	gene838	-0.00154613	0.00522421	-0.0051596					peak11427											peak8872												peak2758
peak655	gene838	-0.00622992	0.00949694	0.00286869					peak11460											peak519												peak1439
peak656	gene838	-0.00616855	0.0084583	0.000485533					peak4427											peak11515												peak9376
peak657	gene838	-0.00170118	-0.00382338	0.0110125					peak9175											peak5869												peak142
peak658	gene838	0.00338701	0.00511491	0.00151912					peak2738											peak9915												peak8655
peak659	gene838	0.00537831	0.00925695	-0.00339854					peak10738											peak5873												peak11325
peak660	gene842	-0.00562958	-0.000303917	-0.00438912					peak11592											peak4491												peak2356
peak661	gene850	-0.0196079	0.0106479	-0.00903799					peak462											peak11530												peak4431
peak662	gene852	-0.0100892	0.0103664	-0.00651064					peak3602											peak11486												peak10669
peak663	gene857	0.00393589	0.00100627	0.00269143					peak906											peak925												peak7616
peak664	gene859	0.00572802	-0.00644784	-0.000229647					peak11599											peak4363												peak6886
peak665	gene860	0.00442205	0.000235421	0.0113393					peak4747											peak3815												peak6141
peak666	gene861	0.00324003	-0.00598326	0.00132742					peak11250											peak4488												peak7337
peak667	gene862	-0.00531902	0.0102824	0.00413332					peak7693											peak6874												peak4525
peak668	gene862	-0.0084783	0.0109158	-0.00611087					peak1060											peak11565												peak6264
peak669	gene862	-0.000328246	-0.00162548	0.00645816					peak8440											peak11532												peak10998
peak670	gene862	-0.0328506	-0.00850842	-0.0082207					peak6537											peak1438												peak3255
peak671	gene862	-0.0044241	-0.000776155	0.00504712					peak9710											peak439												peak7746
peak672	gene862	0.0162384	0.0259271	0.0114804					peak3008											peak6025												peak2835
peak673	gene862	-0.00544076	0.00875354	0.00152703					peak1034											peak885												peak7071
peak674	gene862	-0.00314322	0.00606977	0.00825716					peak8041											peak2176												peak8009
peak675	gene862	-0.0250642	0.00803401	0.0022189					peak10191											peak5563												peak2814
peak676	gene862	-0.0169946	-0.00342864	0.0038601					peak4113											peak11371												peak6032
peak677	gene862	-0.0161398	-0.0133686	0.00433949					peak3073											peak5813												peak10078
peak678	gene862	-0.0046118	0.00288161	-0.00292858					peak7213											peak4498												peak3018
peak679	gene862	0.00363536	0.0113644	-0.0075574					peak8638											peak11309												peak1051
peak680	gene862	-0.00679675	0.0031309	-0.00326541					peak11424											peak409												peak8449
peak681	gene862	-0.0070397	0.00105385	-0.00374998					peak11205											peak7964												peak7099
peak682	gene862	-0.0138041	-0.000671312	-0.00519143					peak7559											peak8076												peak10700
peak683	gene862	-0.0102376	-0.000366164	-0.000794253					peak11540											peak6697												peak6183
peak684	gene862	-0.0052049	0.00820017	-0.00831053					peak8249											peak9422												peak4498
peak685	gene862	-0.00245387	0.00226403	-0.00408061					peak9939											peak3193												peak5672
peak686	gene862	-0.00896379	0.000383262	0.00905428					peak4173											peak4495												peak7118
peak687	gene862	0.00112069	0.00312852	-0.00352244					peak1494											peak7328												peak10431
peak688	gene862	-0.00939569	0.00426895	0.00195334					peak2406											peak9402												peak8642
peak689	gene862	-0.00138287	0.00061984	-0.00158036					peak7237											peak9336												peak10073
peak690	gene869	-0.00737178	-0.000553623	0.00520418					peak10480											peak6248												peak5169
peak691	gene869	-0.00293047	0.0068222	0.000128673					peak11118											peak6313												peak2405
peak692	gene870	0.00254677	-0.0030552	-0.0122036					peak10843											peak9296												peak6383
peak693	gene873	-0.00393823	-0.00199236	0.00439615					peak11517											peak6138												peak4083
peak694	gene883	-0.0105237	-0.00521064	-0.00996957					peak8083											peak10956												peak11527
peak695	gene883	-0.00127421	0.000880315	-0.00166336					peak10235											peak9338												peak7928
peak696	gene883	-0.00560867	0.00939659	-0.00424747					peak10255											peak7200												peak3635
peak697	gene883	0.00364178	0.00506064	0.0168516					peak423											peak6693												peak6921
peak698	gene883	0.00302138	0.00533034	0.00596653					peak5512											peak11256												peak11557
peak699	NA	-0.00634986	-0.00241267	0.0161237					peak4504											peak4490												peak3634
peak700	NA	-0.0113386	-0.00663761	0.0132245					peak11293											peak3214												peak3072
peak701	NA	-0.00776464	-0.00614363	0.0158212					peak11458											peak3894												peak9837
peak702	NA	-0.00842073	-0.00804202	0.0174344					peak11582											peak8081												peak1980
peak703	NA	-0.00835675	-0.00590102	0.0164049					peak11597											peak10817												peak7453
peak704	NA	-0.00810535	-0.006443	0.0161322					peak11541											peak11483												peak6694
peak705	gene887	0.00425664	-0.00848648	-0.0016129					peak6787											peak11149												peak9956
peak706	gene889	0.00888241	-0.0132124	-0.0188705					peak11583											peak6335												peak6874
peak707	gene891	-0.00386544	0.0032545	0.00189108					peak1668											peak9185												peak5242
peak708	gene892	0.00418359	-0.00947517	0.00306469					peak2265											peak1836												peak7964
peak709	gene892	0.0106804	-0.00517886	-0.00578876					peak676											peak1674												peak2036
peak710	gene892	0.003541	-0.00862106	-0.0117497					peak3133											peak9978												peak8298
peak711	gene892	-0.000532907	-0.0066312	0.00155943					peak4511											peak11544												peak8869
peak712	gene894	0.00217728	-0.00358099	-0.00578183					peak7990											peak6533												peak11121
peak713	gene895	0.0101706	-0.00778043	-0.00649831					peak6480											peak11471												peak3374
peak714	gene896	0.0104117	-0.00416286	-0.00919106					peak1278											peak983												peak10535
peak715	gene903	0.00394855	-0.00095392	-0.00246879					peak7638											peak6950												peak9939
peak716	gene903	0.0126398	-0.0074466	-0.0119827					peak9251											peak5641												peak1122
peak717	gene905	0.00253311	-0.000653352	0.0019129					peak3597											peak11396												peak8578
peak718	gene907	-0.000903831	0.00159982	0.00452845					peak11241											peak9013												peak5434
peak719	gene907	-0.00144171	-0.00271652	-0.00073329					peak9697											peak8401												peak3201
peak720	gene907	0.0101681	-0.00706172	0.000106713					peak8410											peak11383												peak8854
peak721	gene912	-0.00913533	0.00270821	-0.0137235					peak10657											peak3933												peak11264
peak722	gene913	0.00544032	0.00438231	0.00471407					peak2842											peak3286												peak10362
peak723	gene913	0.00454878	0.00554712	0.00328328					peak1364											peak11420												peak6665
peak724	gene914	0.0073511	0.00325155	0.000989888					peak6705											peak9984												peak2440
peak725	gene916	0.00496463	0.00190845	0.00575613					peak1152											peak4215												peak2174
peak726	gene918	0.00520146	-0.00362786	-0.00188536					peak3576											peak3072												peak7990
peak727	gene915	0.00979256	0.00124272	0.000604336					peak9174											peak11380												peak3980
peak728	gene917	-0.000691712	0.00923404	0.000729826					peak4751											peak8103												peak9251
peak729	gene921	0.00520502	0.00189407	-0.0116174					peak9814											peak11470												peak7648
peak730	gene921	0.000144619	0.00351332	0.00222333					peak4500											peak2426												peak7995
peak731	gene922	0.00497684	0.00716592	-0.00513487					peak11092											peak11369												peak6598
peak732	gene921	0.00761182	-0.00597264	0.00749934					peak9655											peak9967												peak8873
peak733	gene924	-0.0162962	0.00937942	-0.0166388					peak6911											peak10938												peak4882
peak734	gene933	1.3694e-05	0.002043	-0.00786723					peak9944											peak4281												peak3073
peak735	gene935	-0.00486667	0.0098622	-0.00959648					peak4906											peak4523												peak1253
peak736	gene935	0.00286635	0.00180707	0.0103767					peak8509											peak9337												peak5417
peak737	gene935	-0.000864005	0.00619139	-0.0057314					peak2449											peak11288												peak10959
peak738	gene935	0.00290111	0.0013761	0.000247905					peak10992											peak11169												peak7593
peak739	gene935	-0.00843356	0.00334783	-0.0133702					peak8951											peak11434												peak2272
peak740	gene935	0.00260397	0.00164946	0.00631192					peak8191											peak6056												peak8103
peak741	gene937	-0.0079443	0.00477198	-0.0118136					peak7920											peak7292												peak2151
peak742	gene938	0.00364003	-0.00527282	-0.00283344					peak1444											peak11562												peak263
peak743	gene937	0.00507054	-0.00510959	-0.00170938					peak8484											peak1595												peak8524
peak744	gene937	-0.00704155	0.00590708	-0.00775471					peak6227											peak1947												peak10235
peak745	gene940	0.00700513	0.0200319	0.00175456					peak7217											peak11242												peak1257
peak746	gene940	-0.0131368	0.0141755	-0.00254945					peak10534											peak7193												peak2875
peak747	gene940	-0.0134209	0.0187598	-0.0146995					peak377											peak9339												peak218
peak748	gene940	-0.00867174	0.00624311	-0.0126375					peak5744											peak5018												peak1496
peak749	gene940	-5.48129e-05	-0.00270247	0.00278906					peak516											peak319												peak7402
peak750	gene943	-0.0134897	0.00261023	-0.00967233					peak807											peak8590												peak7877
peak751	gene943	0.000227081	0.00846623	0.00246644					peak3565											peak1128												peak5938
peak752	gene944	0.0110821	-0.00919279	-0.00830906					peak1597											peak4630												peak2490
peak753	gene944	-0.0146144	-0.00160243	-0.00965621					peak10503											peak4728												peak9190
peak754	gene948	0.00986012	-0.00519048	-0.0130012					peak4882											peak311												peak4120
peak755	gene949	0.00644361	0.0113185	-0.00319726					peak8967											peak10578												peak7475
peak756	gene952	0.0181157	-0.0239689	-0.023123					peak11399											peak7659												peak9110
peak757	gene952	0.00325408	-0.00851047	-0.00422931					peak6786											peak7618												peak10446
peak758	gene962	0.00625069	0.00137184	-0.00999879					peak9134											peak11264												peak5228
peak759	gene963	0.00495059	0.00312459	0.000460261					peak8721											peak5742												peak1815
peak760	gene963	0.00231271	-0.0031595	-0.0112901					peak8057											peak3241												peak5873
peak761	gene966	-0.00817984	0.00516553	-0.00501593					peak6754											peak8874												peak9558
peak762	gene970	-0.00693095	0.00707681	-0.00228617					peak2446											peak8111												peak3500
peak763	gene971	-0.00579251	0.0139619	0.00304285					peak2394											peak2297												peak4775
peak764	gene971	-0.0039664	-0.00178704	0.00499657					peak210											peak4982												peak8180
peak765	gene971	0.00355664	-0.00260275	0.002586					peak11525											peak8821												peak7521
peak766	gene972	0.00140474	0.00691635	-0.00296542					peak3243											peak4582												peak10797
peak767	gene971	0.00264574	0.00241299	-0.00413196					peak1893											peak3100												peak9559
peak768	gene973	0.00372477	-0.00770378	-0.005133					peak9279											peak928												peak5648
peak769	gene974	0.00209087	0.000291282	-0.00640133					peak11520											peak6266												peak10125
peak770	gene979	-0.00843615	0.0118816	-0.00568247					peak2527											peak6740												peak8749
peak771	gene983	0.00341403	-0.00993923	-0.00916072					peak40											peak9747												peak8448
peak772	gene983	0.00202543	-0.00160126	0.00528925					peak3299											peak9077												peak5485
peak773	gene985	0.00591911	-0.0102467	-0.00985881					peak5329											peak8912												peak7947
peak774	gene987	0.00528494	-0.00138859	-0.000471446					peak11482											peak4366												peak3506
peak775	gene987	0.00334388	-0.00201373	-0.00151589					peak11522											peak10737												peak6094
peak776	gene992	0.0072488	0.00220247	-0.0026562					peak6294											peak11170												peak2626
peak777	gene993	-0.00132445	0.00762695	-0.00982604					peak1497											peak10388												peak5647
peak778	gene995	0.00943289	-0.011616	-0.0119038					peak10477											peak8869												peak4470
peak779	gene996	0.007867	-0.00197959	-0.0135031					peak11302											peak3767												peak7033
peak780	gene998	-0.000196871	-0.00933266	8.91289e-05					peak4212											peak7071												peak10789
peak781	gene999	0.00564458	-0.00574795	-0.00174498					peak11173											peak426												peak1087
peak782	gene1000	0.0115345	-0.00729492	-0.00325086					peak3735											peak4759												peak1118
peak783	gene1002	0.00680963	-0.00742617	0.00507941					peak8153											peak6314												peak10299
peak784	gene1004	0.00218618	-0.00201679	0.000329855					peak2228											peak5399												peak10585
peak785	gene1009	-0.00220503	0.00709879	-0.0152741					peak11594											peak2401												peak7554
peak786	gene1010	-0.00930129	-0.00181807	-0.00157299					peak2626											peak10313												peak11262
peak787	gene1010	-0.0161716	0.000791166	0.00475021					peak11410											peak4785												peak706
peak788	gene1010	-0.00820766	0.00241155	-0.00157357					peak187											peak8078												peak7389
peak789	NA	-0.00977884	-0.00270462	0.00562323					peak1335											peak3726												peak1906
peak790	gene1014	-0.0022897	0.00141722	-0.00105933					peak7918											peak7176												peak6697
peak791	gene1015	-0.0046371	0.00751791	0.00880409					peak10636											peak5585												peak2377
peak792	gene1017	-0.00780781	-0.000283778	0.00722402					peak11242											peak5891												peak7785
peak793	gene1016	-0.000428896	-0.00168961	-0.0171196					peak7770											peak4688												peak1991
peak794	gene1016	-0.0137219	0.000834467	-0.0124702					peak9421											peak284												peak5214
peak795	gene1019	0.00119706	0.000380841	0.00906943					peak513											peak11214												peak11510
peak796	gene1018	0.0119746	-0.0129636	-0.00280545					peak1641											peak8283												peak3978
peak797	gene1020	0.00515257	-0.00281505	0.00189896					peak8314											peak612												peak10040
peak798	gene1020	-0.000125053	0.00787022	-0.0151903					peak6703											peak11278												peak1125
peak799	gene1020	0.000498816	0.00599357	-0.00551721					peak6166											peak9167												peak11514
peak800	gene1020	0.001621	-0.00769683	-0.00445788					peak4352											peak2660												peak8286
peak801	gene1020	0.00765442	-0.0081286	-0.00415405					peak1093											peak11395												peak5969
peak802	gene1022	0.00559894	0.00445101	0.00492234					peak11542											peak6922												peak6218
peak803	gene1023	0.00711849	-0.00433281	0.00050575					peak1291											peak11447												peak11020
peak804	gene1024	-0.000151137	0.0023672	-0.00013426					peak3527											peak11495												peak4875
peak805	gene1025	0.00184975	-0.00116656	-0.00802004					peak7589											peak6202												peak409
peak806	gene1026	0.000344044	0.0076394	0.00637853					peak2529											peak2987												peak2577
peak807	gene1026	-0.017712	0.0108911	-0.00523316					peak7465											peak5870												peak5386
peak808	gene1030	0.00524444	0.00108119	-0.000675974					peak4617											peak11241												peak10371
peak809	gene1033	-0.000923672	-0.00371366	0.00833149					peak4128											peak11525												peak10523
peak810	gene1033	0.00413291	0.0117211	0.00225889					peak8300											peak4046												peak8232
peak811	gene1034	-0.00402154	0.00273537	0.00478457					peak7361											peak4678												peak9257
peak812	gene1038	0.0101236	-0.00523293	0.00815946					peak3582											peak10561												peak11438
peak813	gene1039	0.00895253	-0.005593	0.00882716					peak6098											peak9678												peak9914
peak814	gene1039	0.015729	-0.00495143	-0.0106571					peak5460											peak9846												peak8063
peak815	gene1041	0.0100195	-0.00114522	0.0102344					peak11412											peak8987												peak4751
peak816	gene1042	0.012841	-0.00812743	-0.00713938					peak2223											peak9953												peak1973
peak817	gene1042	0.00404323	-0.0077622	0.000567625					peak6292											peak9964												peak10867
peak818	gene1044	-0.00760693	-0.00306489	-0.0150761					peak10791											peak9640												peak5211
peak819	gene1044	0.00704038	-0.00445038	0.0092998					peak1092											peak8609												peak5600
peak820	gene1047	-0.0011073	-0.00125756	0.011648					peak11462											peak9504												peak8617
peak821	gene1047	0.00470189	-0.0015899	0.000802411					peak417											peak9586												peak3813
peak822	gene1047	-0.000434116	0.00869106	0.000873606					peak5295											peak10158												peak9038
peak823	gene1047	-0.0035646	0.00940017	-0.00777532					peak11602											peak6841												peak7462
peak824	gene1047	-0.00202741	0.00686586	0.0051783					peak11420											peak3857												peak3308
peak825	gene1047	-0.00274761	0.00121162	-0.000557819					peak1318											peak5821												peak3019
peak826	gene1047	-0.00448224	-0.00576823	0.00703679					peak6722											peak248												peak8
peak827	gene1047	0.00234393	0.00575365	-0.00605294					peak9545											peak5325												peak6906
peak828	gene1047	-0.009477	0.00445183	0.00672783					peak9968											peak11215												peak7582
peak829	gene1047	-0.00146168	0.00247084	0.00596235					peak11231											peak11194												peak3622
peak830	gene1047	-0.0026035	0.000539999	0.00911136					peak2915											peak9863												peak11267
peak831	gene1047	-0.00591986	0.00143352	-0.00185501					peak11188											peak5653												peak1477
peak832	gene1047	-0.00241981	-0.00145409	0.00399056					peak11294											peak4628												peak7971
peak833	gene1047	-0.0151578	-0.00382508	-0.00851438					peak11530											peak1616												peak8931
peak834	gene1047	0.00297429	0.017409	-0.00550657					peak9959											peak3138												peak6894
peak835	gene1048	0.00978627	-0.013353	-0.0171911					peak9958											peak8174												peak4435
peak836	gene1050	0.012112	-0.0151546	0.017949					peak478											peak11202												peak431
peak837	gene1050	-0.0015816	0.000770886	0.00266045					peak6211											peak3120												peak1884
peak838	gene1050	0.0037234	0.0023758	0.00830339					peak7528											peak3553												peak1982
peak839	gene1050	-0.00284622	0.0148655	-0.000812489					peak4679											peak942												peak2177
peak840	gene1050	0.000595819	0.00259083	0.000405344					peak8633											peak5834												peak10938
peak841	gene1050	-0.0016463	0.00173414	0.00776267					peak1922											peak1512												peak4718
peak842	gene1050	0.00334252	0.000640458	0.00523					peak10329											peak7466												peak1073
peak843	gene1050	0.00116195	0.00534953	0.00976561					peak4598											peak6165												peak3765
peak844	gene1051	0.00362815	-0.00289477	0.0150777					peak11094											peak8010												peak4414
peak845	gene1050	-0.0144382	0.0037123	0.00356377					peak9472											peak8234												peak11064
peak846	gene1053	-0.00247672	0.000130769	0.0104058					peak2034											peak2247												peak5987
peak847	gene1050	-0.00968732	-0.00419444	0.00242432					peak5742											peak8443												peak3576
peak848	gene1054	-0.00627494	0.0211224	0.00397067					peak5774											peak3812												peak601
peak849	gene1054	-0.00888613	0.00848914	0.00533219					peak9066											peak9102												peak553
peak850	gene1054	-0.00472932	0.00227042	-0.000905764					peak9996											peak4083												peak6555
peak851	gene1054	-0.00263435	0.000393168	0.00616221					peak661											peak912												peak8389
peak852	gene1054	0.00241419	0.00346699	0.00522514					peak7923											peak11520												peak1661
peak853	gene1054	-0.00323542	-0.00135868	0.00783315					peak10078											peak6152												peak3185
peak854	gene1056	0.00712226	-0.01481	0.0120955					peak9875											peak6078												peak1695
peak855	gene1057	0.00672222	-0.00692432	-0.00194651					peak3379											peak7299												peak8793
peak856	gene1056	-0.00717089	-0.000959126	0.0035849					peak2453											peak9888												peak2906
peak857	gene1064	-0.00962211	-0.008092	0.0127849					peak7889											peak11361												peak11528
peak858	gene1066	-0.00716917	0.000847634	0.00808164					peak2535											peak9482												peak2426
peak859	gene1066	-0.00412047	-0.00820731	0.0161228					peak11533											peak10392												peak2306
peak860	gene1068	-0.00163229	-0.0289361	0.0109783					peak10111											peak2652												peak10679
peak861	gene1068	-0.00811842	-0.0385026	0.00673258					peak2556											peak3742												peak3742
peak862	gene1068	0.0095752	-0.0141173	0.00660325					peak11266											peak5514												peak8321
peak863	gene1069	0.00328227	-0.00291977	0.00879953					peak11604											peak8214												peak1885
peak864	gene1069	0.00527698	0.00266382	0.00372462					peak11236											peak2295												peak1916
peak865	gene1069	0.000152423	-0.00220227	0.0107905					peak11008											peak8813												peak10467
peak866	gene1069	-0.00318343	-0.000976048	0.0122365					peak11003											peak10855												peak2915
peak867	gene1070	-0.00849039	0.00341183	0.00077091					peak11046											peak11221												peak3004
peak868	gene1070	0.00208887	2.60068e-05	0.0128434					peak5293											peak4646												peak1909
peak869	gene1071	-0.00844844	0.0111674	-0.000822102					peak1299											peak2201												peak3052
peak870	gene1070	-0.0138952	0.00759442	-0.0049966					peak11401											peak9810												peak11189
peak871	gene1071	-0.0104829	0.0117285	-0.00952142					peak2342											peak6694												peak10537
peak872	gene1070	0.0133096	-0.00150252	-0.00303513					peak11528											peak11184												peak1438
peak873	gene1075	0.00412238	-0.00378084	-0.0125118					peak3583											peak2181												peak4661
peak874	gene1075	0.000623449	0.00113062	-0.0155341					peak9484											peak8844												peak2842
peak875	NA	0.0156147	-0.00256855	0.0467603					peak10417											peak3966												peak941
peak876	NA	0.00459186	-0.0115096	0.0277263					peak2534											peak11267												peak5828
peak877	NA	0.00826998	-0.0127591	0.02771					peak2755											peak11597												peak2865
peak878	gene1077	-0.0105789	0.00756789	0.00442597					peak4879											peak3139												peak6155
peak879	gene1079	-0.00141868	-0.00406336	0.0150599					peak5623											peak11423												peak5514
peak880	gene1079	0.0126617	-0.00745351	0.0421745					peak8861											peak2983												peak2759
peak881	gene1079	0.0166124	0.0080735	0.0464984					peak11439											peak3504												peak2863
peak882	gene1079	0.01955	0.00103176	0.0385621					peak156											peak8777												peak9888
peak883	gene1079	0.00745002	-0.0200172	0.0205237					peak11580											peak11374												peak10562
peak884	NA	-0.00113096	-0.0148615	0.0233733					peak3390											peak10608												peak6733
peak885	NA	0.0013996	-0.0156999	0.0277353					peak158											peak2183												peak10682
peak886	gene1080	-0.00954443	-0.00299976	0.00780668					peak3854											peak2672												peak6397
peak887	gene1080	-0.00643628	0.00420147	0.000894552					peak11050											peak8442												peak4737
peak888	gene1080	-0.00729999	-0.000312304	-0.00810119					peak2175											peak249												peak10723
peak889	gene1081	-0.00455011	0.00460074	0.00276306					peak3953											peak7556												peak9060
peak890	gene1081	-0.000788258	-0.000858315	0.00358563					peak11467											peak2345												peak7302
peak891	gene1081	-0.0108878	0.00469993	-0.00906789					peak10608											peak3053												peak1960
peak892	NA	-0.0451787	-0.0420359	-0.0262884					peak10342											peak883												peak11278
peak893	gene1082	-0.00645569	0.00209408	-0.00343773					peak11197											peak9856												peak3120
peak894	gene1083	0.00406953	-0.00322968	0.0115379					peak7212											peak6906												peak1671
peak895	gene1082	0.000811182	0.0017395	0.00541693					peak10164											peak11379												peak8073
peak896	gene1082	-0.00533377	-0.00370944	0.00860134					peak1508											peak4578												peak642
peak897	gene1084	0.00206018	0.00190989	0.00630781					peak6383											peak6842												peak6745
peak898	gene1087	0.0015442	0.00533444	0.00869508					peak11457											peak11388												peak8861
peak899	gene1088	-0.0118059	0.0129763	0.00107495					peak310											peak6207												peak7216
peak900	gene1089	0.000239652	0.00824539	0.0109845					peak3306											peak3918												peak427
peak901	gene1089	-0.00421579	-0.00295738	0.0131561					peak6552											peak11603												peak7600
peak902	gene1091	-0.0216399	-0.0278188	0.0166736					peak11265											peak4847												peak7171
peak903	gene1091	0.00398602	-0.0077127	-0.00625402					peak11300											peak6249												peak4735
peak904	gene1092	0.00160855	0.000743708	-0.000695929					peak2332											peak11373												peak10992
peak905	gene1094	0.00189649	0.00788006	0.00241744					peak7190											peak4652												peak3747
peak906	gene1100	-0.0163933	-0.00949076	0.00741776					peak7600											peak456												peak6639
peak907	NA	0.00453976	-0.0040245	-0.0041435					peak4979											peak5938												peak1451
peak908	NA	-0.0016576	-0.00508403	-6.45403e-05					peak11438											peak4591												peak232
peak909	gene1101	-0.00242084	-0.00205596	0.00936413					peak8692											peak6769												peak2189
peak910	gene1101	0.00353771	-0.000628996	0.00681146					peak3135											peak1755												peak6895
peak911	gene1101	-0.00220765	-0.00136778	-0.00524534					peak1910											peak3939												peak11322
peak912	gene1101	-0.000732778	-0.0187771	0.00563231					peak11396											peak4777												peak540
peak913	gene1101	0.00508866	-0.00540892	-0.00257121					peak1286											peak2324												peak8577
peak914	gene1101	-0.00128065	-0.00297947	0.0082108					peak11221											peak4580												peak9714
peak915	gene1101	7.86322e-05	0.002861	0.0150732					peak966											peak11222												peak9296
peak916	gene1101	0.00233153	0.0019727	0.00469433					peak11181											peak3308												peak6965
peak917	gene1101	-0.00462634	-0.00414101	0.00179179					peak8059											peak2226												peak10427
peak918	gene1101	-0.013543	0.0121676	0.00430786					peak4023											peak1485												peak11218
peak919	gene1101	-0.00850921	0.00146438	-0.00774962					peak11481											peak11438												peak11375
peak920	gene1101	0.00276116	-0.00194134	0.00901941					peak6714											peak11488												peak141
peak921	gene1101	0.00189237	0.00451814	0.00572632					peak9837											peak1046												peak10417
peak922	gene1103	-0.00542475	-0.0011066	-0.00190104					peak3122											peak9980												peak194
peak923	gene1103	-0.00158443	0.00152578	-0.0037883					peak8574											peak553												peak4366
peak924	gene1105	0.00313707	-0.00178241	0.00768372					peak6654											peak4887												peak1876
peak925	gene1107	0.00974675	-0.0155896	-0.00705049					peak11480											peak8389												peak3407
peak926	gene1108	0.00475787	-0.00208454	-0.00588771					peak902											peak8057												peak168
peak927	gene1108	-0.00486561	0.00270215	0.0140627					peak11423											peak6856												peak3164
peak928	gene1108	0.00674537	-0.0172016	-0.0108239					peak11182											peak485												peak3162
peak929	gene1109	-0.0117976	0.00547116	-0.00530941					peak1091											peak1827												peak4523
peak930	gene1109	0.00705572	-0.00448528	-0.00722245					peak11519											peak1621												peak4980
peak931	gene1110	6.25608e-05	0.00249697	0.0136942					peak11478											peak7209												peak10564
peak932	gene1117	-0.00713575	0.0019717	0.0111814					peak8097											peak3995												peak609
peak933	gene1110	0.00257183	0.00102963	0.0151836					peak11170											peak11206												peak2186
peak934	gene1112	-0.00130908	0.0026634	0.0134726					peak8476											peak6965												peak7428
peak935	gene1116	-0.00225032	0.00144217	0.0171059					peak11414											peak11435												peak6954
peak936	gene1117	0.00305323	-0.00369873	0.0080934					peak6451											peak11405												peak8205
peak937	gene1123	0.00423583	-0.00012489	-0.00511128					peak1368											peak3845												peak7124
peak938	gene1124	-0.00412259	0.00511198	0.00454594					peak2894											peak11526												peak3565
peak939	gene1124	-0.0106145	0.0118313	0.0033791					peak1146											peak9979												peak1748
peak940	gene1124	-0.00712475	-0.000545861	0.00327127					peak2922											peak3956												peak7167
peak941	NA	0.00334716	0.00112291	-0.02028					peak10679											peak7191												peak7053
peak942	NA	-0.0269336	-0.0184524	-0.0132262					peak271											peak10978												peak4128
peak943	NA	-0.0400056	-0.033293	-0.028608					peak11169											peak1629												peak5704
peak944	NA	-0.00390342	0.00216325	-0.0150566					peak9114											peak3054												peak7645
peak945	gene1125	0.0049975	0.00989576	0.0104033					peak139											peak3340												peak7304
peak946	gene1125	-0.00742484	0.00534667	0.00513416					peak1015											peak2180												peak11341
peak947	gene1126	0.003392	-0.00584025	-0.0118666					peak1366											peak9278												peak2913
peak948	gene1127	-0.000957476	-0.00842982	0.00575067					peak11407											peak9968												peak11373
peak949	gene1127	0.0113271	0.0017472	0.0129732					peak2301											peak10688												peak1668
peak950	gene1127	0.00546994	-0.00148325	0.0086822					peak11240											peak11564												peak11046
peak951	gene1127	0.00518267	0.00134284	0.00507226					peak6332											peak6665												peak3995
peak952	gene1127	0.000530748	0.00162145	0.00878347					peak11215											peak4375												peak8715
peak953	gene1127	0.00356889	0.00275779	0.00734522					peak11531											peak7218												peak9938
peak954	gene1129	-0.00608865	0.00739985	0.000733208					peak8858											peak3808												peak8798
peak955	gene1129	-0.00840165	-0.00537053	0.00270359					peak11306											peak430												peak9231
peak956	gene1129	-0.00505004	-0.00212813	0.0098888					peak4863											peak4579												peak5834
peak957	gene1129	-0.0038561	-0.00295719	0.000127194					peak3919											peak491												peak10407
peak958	gene1129	-0.0262048	0.0213409	0.0019657					peak3922											peak11182												peak2009
peak959	gene1131	-0.00605343	0.00477614	0.0120238					peak6583											peak11220												peak11416
peak960	gene1131	0.00985139	0.0118392	0.0135732					peak8770											peak11234												peak8832
peak961	gene1131	0.0319344	0.023958	0.0216896					peak2758											peak1282												peak1023
peak962	gene1131	0.0215405	0.0226958	0.00546152					peak11524											peak6361												peak1179
peak963	gene1131	-0.00720325	-0.00208328	0.00558518					peak11020											peak1503												peak7404
peak964	gene1131	-0.00938018	0.00146679	-0.0114379					peak9483											peak11594												peak6293
peak965	gene1132	-0.0105804	0.00728737	-0.00380076					peak11539											peak4735												peak6816
peak966	gene1132	-0.0214184	0.015996	0.00193901					peak7215											peak11528												peak7365
peak967	gene1132	-0.00696343	0.0122006	-0.00537074					peak8728											peak5648												peak6842
peak968	gene1132	-0.00348057	-0.00240458	0.00707752					peak4480											peak1630												peak117
peak969	gene1134	0.0135474	-0.00917453	-0.00654925					peak6972											peak4784												peak10170
peak970	gene1135	0.006705	0.00161727	0.00456742					peak11529											peak2560												peak10889
peak971	gene1136	0.0065125	0.00344827	0.00546045					peak9983											peak1505												peak9258
peak972	gene1137	0.0122018	-0.00929747	-0.0129876					peak9031											peak11257												peak3808
peak973	gene1139	0.00914309	-0.00396784	-0.0148486					peak11292											peak5748												peak8844
peak974	gene1146	0.00704647	-0.00424789	0.00102871					peak6779											peak6164												peak8288
peak975	gene1147	0.00205663	0.00094228	0.00617688					peak3048											peak7386												peak4124
peak976	gene1147	-0.00268084	0.00128432	0.00596935					peak7250											peak5567												peak4846
peak977	gene1147	0.00163112	-0.00175212	0.00603844					peak11479											peak11372												peak10577
peak978	gene1148	0.000841093	0.00329673	0.0060543					peak2863											peak4026												peak10028
peak979	gene1148	0.00558151	0.00352752	0.00473591					peak11263											peak2338												peak5248
peak980	gene1148	-0.00300604	-0.0002469	-1.90246e-05					peak9853											peak2466												peak3475
peak981	gene1147	-0.00288462	-0.0037903	0.000303872					peak3119											peak11211												peak7801
peak982	gene1150	-0.0118402	0.00385737	-0.0136429					peak11477											peak9258												peak10089
peak983	gene1150	0.0116637	-0.0163345	-0.012706					peak11247											peak11216												peak8638
peak984	gene1151	0.00735801	-0.000961168	-0.0126256					peak11437											peak309												peak11198
peak985	gene1154	-0.000480318	-0.00875407	-0.0138952					peak7305											peak9982												peak7338
peak986	gene1156	-0.0107252	0.000840196	-0.0113004					peak11220											peak11243												peak10788
peak987	gene1156	-0.0132493	-0.00120058	-0.00681698					peak11486											peak8964												peak3602
peak988	gene1157	-0.00295447	0.00415478	-0.00145875					peak9683											peak4782												peak7364
peak989	gene1157	-0.00548782	0.00930305	-0.0042853					peak10710											peak4731												peak7050
peak990	gene1157	-0.000815629	0.00286718	-0.00159187					peak3907											peak6310												peak6165
peak991	gene1157	-0.00575897	0.0122754	-0.00814303					peak3570											peak11584												peak7799
peak992	gene1157	-0.00294593	0.00832908	0.00201758					peak8768											peak2316												peak7342
peak993	gene1157	0.00115308	0.00618156	0.00740346					peak6605											peak4550												peak8659
peak994	gene1157	0.00551043	-0.00661765	-0.00229723					peak2216											peak11195												peak9590
peak995	gene1160	0.00886338	-0.0129584	-0.0171854					peak5397											peak11472												peak2180
peak996	gene1162	-0.0083789	0.00734342	-0.000335559					peak1435											peak6014												peak5335
peak997	gene1162	-0.00606116	0.00732501	-0.000751974					peak5388											peak11147												peak7786
peak998	gene1162	-0.00114736	-0.00178242	-0.00057621					peak7851											peak8873												peak2707
peak999	gene1162	0.00480607	-0.0117584	-0.0317242					peak6137											peak8053												peak2916
peak1000	NA	0.00099011	0.00599584	-0.00478796					peak5404											peak11259												peak4469
peak1001	gene1163	-0.00748084	0.003815	-0.00032215					peak8063											peak9026												peak5748
peak1002	gene1167	-0.00660978	0.00797691	-0.00961791					peak3055											peak1617												peak7252
peak1003	gene1170	0.00526359	0.00679707	-0.00554103					peak2714											peak1610												peak2143
peak1004	gene1173	0.00035493	-6.00688e-05	0.00187286					peak11260											peak6909												peak1947
peak1005	gene1176	-0.00176309	0.00558647	-0.000206806					peak5294											peak3902												peak167
peak1006	gene1176	-0.00272063	-0.00646165	0.0109007					peak8270											peak11218												peak7386
peak1007	gene1176	-0.00310441	-0.000877222	0.00901461					peak8150											peak9934												peak756
peak1008	gene1176	-0.00309404	-0.00501111	0.00663399					peak460											peak643												peak8903
peak1009	gene1176	0.00484123	0.00573395	0.0032126					peak8598											peak11307												peak10105
peak1010	gene1176	-0.000271635	-0.00418717	0.00913727					peak6183											peak6870												peak5234
peak1011	gene1178	0.00888508	0.00671555	0.00731016					peak6167											peak313												peak8900
peak1012	gene1178	0.00187071	-0.00788139	0.0108552					peak5205											peak11522												peak10600
peak1013	gene1178	-0.00674634	-0.00856836	0.0191315					peak11413											peak756												peak2897
peak1014	gene1178	0.00720691	0.00595091	0.0103619					peak9931											peak1575												peak3053
peak1015	gene1178	-0.0221421	0.0158899	0.0105368					peak6777											peak8054												peak10147
peak1016	gene1178	-0.0138032	-0.00196052	-0.00721238					peak8397											peak11236												peak8450
peak1017	gene1178	-0.00162184	-0.00127315	0.00189646					peak11395											peak1451												peak5588
peak1018	gene1179	-0.00950841	-0.000916944	0.000750493					peak9698											peak6924												peak1910
peak1019	gene1179	-0.0120027	0.00601007	-0.00856185					peak4339											peak2397												peak7586
peak1020	gene1180	-0.00861313	0.00260722	0.00292566					peak10088											peak1611												peak9879
peak1021	gene1184	0.00716032	-0.00575784	0.00893194					peak10372											peak11378												peak6343
peak1022	gene1185	0.00191488	0.00318608	-0.007382					peak4215											peak2467												peak4390
peak1023	gene1193	0.0188515	-0.0115235	-0.0219598					peak11526											peak3896												peak3505
peak1024	gene1194	-0.00536334	0.00157596	-0.00193353					peak11222											peak2172												peak4437
peak1025	gene1195	-0.00369856	0.0109049	0.00137055					peak1126											peak4577												peak10065
peak1026	gene1197	-0.00026107	0.000991356	-0.00693692					peak2835											peak11244												peak6892
peak1027	gene1199	0.000520527	-0.00490278	-0.00626237					peak9654											peak8834												peak8574
peak1028	gene1200	-0.00259363	-0.00259329	0.000964285					peak277											peak3371												peak11474
peak1029	gene1201	-0.00171381	-0.00815231	-0.00136829					peak10574											peak9484												peak9814
peak1030	gene1201	0.00505664	0.00424743	0.000401745					peak7191											peak11573												peak2313
peak1031	gene1201	-0.00885371	0.00543973	0.00694213					peak4014											peak1082												peak1993
peak1032	gene1201	-0.00576577	-0.00349284	0.00980977					peak675											peak11402												peak9185
peak1033	gene1201	-0.00600809	0.00421959	-0.00133011					peak11400											peak8238												peak178
peak1034	gene1201	-0.0164681	0.0138903	-0.00699739					peak5862											peak1795												peak10316
peak1035	gene1202	-6.08459e-06	0.0135547	0.0072395					peak10812											peak9546												peak9616
peak1036	gene1202	-0.00484711	0.00151828	0.00951723					peak1302											peak3050												peak10182
peak1037	gene1202	-0.000712518	0.00226752	0.00782249					peak2599											peak7211												peak8570
peak1038	gene1203	0.0039236	-0.00446879	-0.0139748					peak9866											peak3853												peak10806
peak1039	gene1203	0.00245568	0.00224433	0.00678955					peak1090											peak2184												peak10657
peak1040	gene1203	0.00508413	0.000621247	-0.00833991					peak11301											peak11258												peak10927
peak1041	gene1203	0.00281405	0.000918059	-0.0007883					peak3758											peak9020												peak5401
peak1042	gene1205	-0.00921325	0.00907854	-0.00240376					peak11177											peak11459												peak3553
peak1043	gene1207	0.00201998	0.00467932	0.00592701					peak5383											peak3022												peak8235
peak1044	gene1209	-0.0051977	-0.00320207	0.00284243					peak11422											peak4618												peak8598
peak1045	gene1210	0.0105635	-0.0146692	-0.0134392					peak3049											peak11409												peak9167
peak1046	gene1213	0.0206717	-0.0208725	-0.0161426					peak11581											peak8051												peak6098
peak1047	gene1215	0.011731	-0.00749378	-0.0158781					peak3021											peak11238												peak4026
peak1048	gene1221	0.00976866	-0.00367085	-0.00553747					peak6028											peak9829												peak8584
peak1049	gene1223	0.00939914	-0.00422145	-0.0139377					peak11406											peak4569												peak3056
peak1050	gene1223	0.000166576	-0.00143579	-0.0140547					peak11534											peak11069												peak1421
peak1051	gene1243	0.0146758	-0.0107085	-0.0175367					peak6318											peak7217												peak2945
peak1052	gene1246	0.00110261	-0.00298244	0.00264846					peak958											peak9483												peak2914
peak1053	gene1246	-0.0266895	-0.0346427	0.0185604					peak6753											peak1571												peak7671
peak1054	gene1246	-0.00494138	-0.0102818	0.0200606					peak4563											peak11474												peak3230
peak1055	gene1246	0.0170476	0.0103028	0.0213471					peak3901											peak1604												peak11503
peak1056	gene1246	4.86558e-05	0.00494353	0.00323659					peak4493											peak11237												peak249
peak1057	gene1251	0.00409422	-0.00694946	-0.0113444					peak9653											peak9038												peak7513
peak1058	gene1255	0.00507522	-0.0034643	0.00610141					peak11393											peak1563												peak2345
peak1059	gene1260	-0.00173501	0.00950341	0.00554785					peak7302											peak2185												peak9856
peak1060	gene1260	-0.0164333	0.0102266	-0.00819516					peak1053											peak3374												peak11069
peak1061	gene1260	0.00396384	0.00231103	0.000799147					peak11392											peak6736												peak5567
peak1062	gene1260	-0.00619406	-0.000898451	0.0113341					peak1418											peak6660												peak1124
peak1063	gene1260	-0.00266592	0.00110679	0.00472145					peak1561											peak902												peak8138
peak1064	gene1260	-0.00434638	0.00138763	0.00554614					peak11304											peak8981												peak4062
peak1065	gene1260	-0.0015966	-0.00146507	0.00504317					peak942											peak9656												peak34
peak1066	gene1260	0.000345229	-0.00364349	0.0183856					peak270											peak2223												peak2092
peak1067	gene1260	-0.0146773	0.00160422	-0.00396632					peak11440											peak9965												peak11008
peak1068	gene1260	-0.00747534	0.00385906	0.00595634					peak2171											peak9899												peak3597
peak1069	gene1260	0.00191514	0.00111725	0.0116193					peak11213											peak199												peak10863
peak1070	gene1260	-0.00206619	-0.00101215	0.00551016					peak2407											peak9421												peak4979
peak1071	gene1261	0.00281592	0.000638338	0.00385467					peak140											peak11362												peak6105
peak1072	gene1262	0.00895931	-0.00834233	-0.000477065					peak514											peak310												peak10560
peak1073	gene1265	0.00956515	-0.0113738	-0.0195678					peak8835											peak11397												peak6310
peak1074	gene1267	0.00845365	-0.00350089	-0.0132957					peak11123											peak2720												peak10993
peak1075	gene1268	0.00520852	0.00463895	-0.0105744					peak11305											peak8182												peak4711
peak1076	gene1269	-0.00278584	-0.00213808	0.00165659					peak6031											peak2474												peak6484
peak1077	gene1270	0.0190575	0.00670906	0.0179268					peak1365											peak2346												peak1120
peak1078	gene1270	0.00163012	-0.00298675	0.00858122					peak3984											peak11595												peak7613
peak1079	gene1272	0.0054632	0.000723892	-0.00594322					peak7214											peak1												peak568
peak1080	gene1272	-0.012826	0.0139447	-0.0161742					peak6276											peak11305												peak10227
peak1081	gene1274	0.00121653	-0.0103351	-0.00848383					peak11097											peak860												peak8744
peak1082	gene1277	0.0234798	-0.0253741	-0.0352896					peak9658											peak2177												peak1497
peak1083	gene1278	0.00313993	-0.00209385	-0.00760349					peak11600											peak7213												peak6873
peak1084	gene1278	-0.000394412	0.00409373	-0.0116421					peak5573											peak6929												peak3726
peak1085	gene1278	-0.00744696	0.00306592	-0.00381989					peak4987											peak7237												peak8485
peak1086	gene1282	-0.00744609	0.00618174	0.00148969					peak8985											peak1592												peak1631
peak1087	gene1282	0.000173264	0.0017372	-0.0188092					peak6746											peak7190												peak10128
peak1088	gene1284	0.0149561	-0.011498	-0.013128					peak5510											peak4300												peak4669
peak1089	gene1288	-0.0016954	0.000432389	-0.00219962					peak6641											peak2171												peak2719
peak1090	gene1289	-0.0254062	-0.0407321	0.0160476					peak11206											peak11240												peak9279
peak1091	gene1289	-0.0216774	-0.0428927	0.0193776					peak10185											peak11538												peak9157
peak1092	gene1289	-0.0190109	-0.0348889	0.00799835					peak6675											peak11436												peak892
peak1093	gene1289	-0.0186596	-0.0334974	0.0242239					peak8991											peak11376												peak5749
peak1094	gene1289	0.000377046	-0.00511498	0.0165795					peak11211											peak9548												peak9267
peak1095	gene1289	-0.00507126	0.000715564	0.0127627					peak1719											peak9257												peak7528
peak1096	gene1289	-0.00224811	0.001968	0.0119259					peak10810											peak143												peak9026
peak1097	gene1289	-0.00599366	-0.00473736	0.0100237					peak8218											peak11375												peak5191
peak1098	gene1289	0.00457547	0.0134186	0.00719917					peak9810											peak1597												peak9259
peak1099	gene1289	0.00476809	0.0110324	0.00326097					peak3120											peak1506												peak2010
peak1100	gene1289	0.00271716	-0.00971909	0.0210868					peak7239											peak11173												peak11551
peak1101	gene1289	0.00305556	-0.0013061	0.00784564					peak10991											peak2173												peak4495
peak1102	gene1289	0.000359706	-0.00204698	0.0185528					peak11488											peak8768												peak6746
peak1103	gene1290	-0.0029051	-0.000359245	0.0143833					peak2437											peak7212												peak9877
peak1104	gene1290	-0.000572727	0.00729228	0.010899					peak11485											peak9655												peak10996
peak1105	gene1290	-0.0141544	0.00709899	0.00511656					peak6666											peak11363												peak1674
peak1106	gene1290	-0.00100631	-0.00293528	0.00517889					peak6655											peak2186												peak7215
peak1107	gene1290	0.00895552	-0.0124502	0.0195638					peak11487											peak1124												peak604
peak1108	gene1290	-0.0142699	0.000172439	-0.00700514					peak7961											peak9545												peak8587
peak1109	gene1290	-0.00209979	0.00941909	0.00390681					peak2819											peak2174												peak6294
peak1110	gene1290	0.00292075	0.00290547	0.00719134					peak2247											peak943												peak5893
peak1111	gene1290	-0.00901581	-0.0124527	0.00690109					peak670											peak1093												peak11147
peak1112	NA	-0.0108639	-0.00414733	0.00928733					peak8981											peak9969												peak10636
peak1113	gene1291	-7.7327e-06	0.011175	0.00304053					peak8655											peak11223												peak8182
peak1114	gene1291	0.00309452	0.000918131	-0.00600018					peak11178											peak1053												peak1844
peak1115	gene1300	0.00850271	-0.0063693	-0.00857684					peak10488											peak5034												peak11187
peak1116	gene1299	0.00529956	-0.00573472	-0.0116762					peak11603											peak1092												peak170
peak1117	gene1302	-0.00955445	0.002986	0.00600444					peak7960											peak9983												peak11257
peak1118	gene1303	-0.00322725	0.00796537	-0.0188165					peak10097											peak9259												peak1795
peak1119	gene1303	0.00448432	-0.00956737	-0.00567707					peak11397											peak8985												peak11041
peak1120	gene1305	0.0126972	-0.0135956	-0.025364					peak10811											peak3851												peak10420
peak1121	gene1314	0.0198702	-0.0114032	-0.0162807					peak7963											peak11183												peak9039
peak1122	gene1317	0.0139386	-0.00506386	-0.0179179					peak11601											peak5612												peak943
peak1123	gene1320	0.0119789	-0.00506114	-0.00854609					peak8986											peak9654												peak10561
peak1124	gene1323	-0.0413111	-0.032478	-0.0246347					peak11584											peak5893												peak6608
peak1125	gene1323	-0.0488281	-0.04228	-0.0189538					peak11404											peak9485												peak1545
peak1126	NA	-0.0247947	-0.0109955	-0.0138815					peak11223											peak861												peak5372
peak1127	gene1324	0.0111471	-0.0149119	-0.00822482					peak7006											peak11233												peak1256
peak1128	gene1324	-0.00139921	-0.0169027	-0.00513745					peak11409											peak7960												peak1546
peak1129	gene1324	0.00255241	0.00161876	0.00556813					peak10040											peak7961												peak11202
peak1130	gene1325	-0.0023095	-0.00158563	0.00379333					peak1598											peak1090												peak3065
peak1131	gene1325	-0.000167841	-0.00977318	0.0112652					peak7962											peak9653												peak7251
peak1132	gene1325	-0.00243728	0.00212161	0.00791466					peak9020											peak3901												peak4586
peak1133	gene1332	-0.0131395	-0.00682055	-0.015015					peak11198											peak7215												peak4375
peak1134	gene1331	0.0018178	-0.00674567	0.00152324					peak7590											peak8986												peak5163
peak1135	gene1333	0.0135792	-0.00212415	0.00767289					peak10486											peak892												peak10554
peak1136	gene1334	-0.00174069	0.00257933	0.00649467					peak11538											peak1125												peak8238
peak1137	gene1335	-0.00964211	-0.00457443	0.00545789					peak11233											peak7962												peak3853
peak1138	gene1335	-0.00925521	0.00866246	-0.00438059					peak11405											peak1091												peak6314
peak1139	gene1335	-0.00447961	0.00393359	-0.000643879					peak8053											peak2228												peak7540
peak1140	gene1335	0.00259898	0.00974542	-0.00904213					peak9852											peak2407												peak545
peak1141	gene1336	0.00160994	-0.00242453	0.0104955					peak7364											peak11521												peak6381
peak1142	gene1338	-0.00331473	0.00744394	-0.0056757					peak11595											peak11190												peak4281
peak1143	gene1338	0.00764617	-0.0136618	0.0101017					peak11402											peak7239												peak5213
peak1144	gene1338	-0.00933859	-0.00397248	-0.00904392					peak9485											peak7963												peak999
peak1145	gene1339	-0.0066365	0.00260317	-0.00129826					peak7216											peak7590												peak3054
peak1146	gene1340	-0.0219236	0.0114143	0.0163288					peak943											peak213												peak2720
peak1147	gene1341	-0.0104702	0.00792543	0.00310705					peak1124											peak9855												peak1494
peak1148	gene1343	-0.00574678	0.0149664	0.00894345					peak7365											peak7214												peak11177
peak1149	gene1343	0.00979193	-0.00486366	0.0240564					peak10489											peak8835												peak11305
peak1150	gene1343	0.0091678	-0.0128372	0.029144					peak892											peak10486												peak5209
peak1151	gene1343	0.00309893	0.00579844	0.00365299					peak10485											peak10488												peak1082
peak1152	gene1343	-0.017342	0.0206146	0.00964208					peak5612											peak7216												peak6736
peak1153	gene1343	-0.00612432	-0.00127799	0.0113331					peak1125											peak10489												peak2184
peak1154	gene1346	-0.0115869	-0.0072411	0.00242536					peak9855											peak10485												peak11178
peak1155	gene1348	0.00329768	-0.00123593	0.00126486					peak10487											peak8963												peak7946
peak1156	gene1348	0.00158438	0.00270907	-0.00094778					peak8963											peak10723												peak8115
peak1157	gene1349	0.00166704	-0.000515809	0.0056656					peak11190											peak8115												peak6642
peak1158	gene1349	-0.0121832	0.00703241	0.00506112					peak8854											peak8854												peak360
peak1159	gene1349	-0.00123337	0.00260458	-0.000161865					peak10723											peak10487												peak3851
peak1160	gene1349	0.00409468	0.00209393	0.0117461					peak6393											peak6393												peak10802
peak1161	gene1349	0.0167251	0.00958605	0.00708021					peak11095											peak1388												peak10213
peak1162	gene1349	-0.00878284	0.00155719	-0.000276992					peak1388											peak11095												peak1617
peak1163	gene1349	-0.00345272	0.00902537	0.00821946
peak1164	gene1349	0.00023591	0.0080372	0.00203531
peak1165	gene1349	0.00316997	0.000639366	0.0099413
peak1166	gene1349	0.000559938	0.00146414	0.00133618
peak1167	gene1354	-0.00247993	-0.00146373	-0.00198114
peak1168	gene1355	0.00328846	-0.000443773	0.00193509
peak1169	gene1354	0.00778869	-0.00397613	-0.00487644
peak1170	gene1356	0.0199981	0.00630434	-0.00443562
peak1171	gene1354	-0.000880664	-0.00423677	-0.0121394
peak1172	gene1356	0.010894	0.00083624	-0.00355789
peak1173	gene1358	0.0015995	0.000535582	0.000665377
peak1174	gene1357	0.00553841	-0.00201641	0.00214815
peak1175	gene1359	0.00525904	-0.00620434	0.00543062
peak1176	gene1363	0.00122272	0.00111878	0.00334437
peak1177	gene1364	0.00851196	-0.00404581	-0.0144252
peak1178	gene1366	0.00530084	0.00387743	-0.00700273
peak1179	gene1369	0.0113412	-0.00255021	-0.0220111
peak1180	gene1370	0.0128274	-0.0127437	-0.0135605
peak1181	gene1371	0.00124335	0.00966351	-0.0039678
peak1182	gene1373	0.00165218	0.0106379	-0.00235263
peak1183	gene1376	0.00395542	0.0147026	0.00539978
peak1184	gene1377	0.0128995	-0.00681747	-0.0159131
peak1185	gene1379	-0.000148821	0.00841997	0.0115677
peak1186	gene1379	0.00886573	-0.00478855	-0.00303547
peak1187	gene1381	0.00771732	0.00480501	-0.00506857
peak1188	gene1382	0.00947264	0.0015036	-0.00866414
peak1189	gene1382	0.00533779	-0.000895048	-0.00911202
peak1190	gene1384	0.0029937	0.000212744	-0.0133262
peak1191	gene1390	-0.00327146	0.00477062	0.0140971
peak1192	gene1390	-0.00516588	-0.00359435	0.00517071
peak1193	gene1390	0.000966218	0.00741893	-0.00679398
peak1194	gene1390	0.00354925	-0.00391319	0.00556721
peak1195	gene1390	-0.000764047	-0.00105086	-0.0156345
peak1196	gene1392	0.00869716	-0.00743331	-0.0110106
peak1197	gene1392	0.00307396	0.00233551	-0.00125063
peak1198	gene1392	-0.00757119	-0.0103793	0.0059151
peak1199	gene1392	0.00161131	0.00181802	0.000817274
peak1200	gene1392	0.00328901	0.00976248	-0.00153628
peak1201	gene1392	0.00312411	0.000990541	0.00685416
peak1202	gene1392	-0.00129822	0.00632774	-0.00389778
peak1203	gene1392	0.0027532	0.0013596	0.00255897
peak1204	gene1392	0.000196387	-0.00202911	0.00824852
peak1205	gene1392	0.00308444	-0.000462225	0.00320275
peak1206	gene1392	-0.00474044	0.00669164	-0.00058368
peak1207	gene1392	-0.00427942	0.000805201	0.0021544
peak1208	gene1392	-0.00372672	0.00242176	0.00841757
peak1209	gene1392	0.002863	0.0100361	0.00688594
peak1210	gene1392	-0.00677791	0.0109419	-0.00283655
peak1211	gene1392	0.00532803	0.00983113	0.0021375
peak1212	gene1392	-0.00808229	0.00193043	-0.00371826
peak1213	gene1392	-0.00364754	0.00716047	-0.00831361
peak1214	gene1392	-0.00260518	-0.00473863	0.00817373
peak1215	gene1392	-0.000805721	-0.00567177	0.00462545
peak1216	gene1392	-0.0082793	-0.00416299	-0.00131488
peak1217	gene1392	-0.00511123	0.00459286	0.0024217
peak1218	gene1392	0.000603133	0.00312967	0.00494193
peak1219	gene1395	0.00553758	0.00324234	-0.00667255
peak1220	gene1395	-0.00200169	-0.00751885	-0.000314527
peak1221	gene1392	0.0043113	-0.00211059	0.00357251
peak1222	gene1393	0.00762509	0.00127907	-0.00093012
peak1223	gene1398	0.0123486	-0.0120408	0.0153063
peak1224	gene1398	0.00479222	0.000224772	0.0066869
peak1225	gene1398	0.00324373	0.00508976	0.0049056
peak1226	gene1398	-0.000619032	0.00596392	0.00341417
peak1227	gene1398	-0.00431651	0.00613173	-0.00538686
peak1228	gene1398	0.0119063	0.0154669	0.00546202
peak1229	gene1401	0.0106577	-0.00104474	0.000713464
peak1230	gene1403	0.00979186	-0.00713332	-0.000419818
peak1231	gene1405	0.0126246	0.00164422	-0.0114085
peak1232	gene1408	0.0116611	-0.0108115	0.00290157
peak1233	gene1408	0.00477775	-0.0099311	-0.00138603
peak1234	gene1409	0.00370102	-0.00231952	0.00828373
peak1235	gene1409	0.00381994	-0.0125896	0.0100214
peak1236	gene1412	-0.00159731	0.00141059	0.00534438
peak1237	gene1413	0.00677265	0.00749437	0.0102353
peak1238	gene1413	0.00200161	0.0195886	0.00881509
peak1239	gene1413	-0.00430586	0.00144181	0.00756386
peak1240	gene1416	0.00144238	0.0136442	0.000854514
peak1241	gene1416	-0.00874075	-0.000620808	-0.010032
peak1242	gene1416	-0.000551535	0.00079347	0.0016638
peak1243	gene1416	0.00728213	-0.00387542	-0.00222592
peak1244	gene1417	0.00322093	0.00183099	0.00216421
peak1245	gene1418	0.00864859	-0.00559992	-0.0035611
peak1246	gene1420	0.00912584	0.0024498	0.000335035
peak1247	gene1420	-0.00428646	-0.00298198	-0.00196763
peak1248	gene1420	0.0089375	-0.00880398	-0.00138678
peak1249	gene1420	0.00878736	-0.00188603	0.0105687
peak1250	gene1420	0.00144842	0.00412569	-0.0111953
peak1251	gene1420	-0.00148642	0.0076593	-0.00509487
peak1252	gene1423	0.00527569	-0.00206183	0.00439927
peak1253	gene1425	0.00942204	-0.00228272	-0.018085
peak1254	gene1428	0.014946	0.00330554	0.00896577
peak1255	gene1435	0.0111837	-0.00307802	-0.00837528
peak1256	gene1464	0.00721946	-0.00865299	-0.0293267
peak1257	gene1464	0.00893191	-0.00777235	-0.0181875
peak1258	gene1467	-0.00614488	0.0082966	-0.00724251
peak1259	gene1469	0.00502785	-0.00490972	-0.0095108
peak1260	gene1473	0.0111054	-0.00559519	-0.00787374
peak1261	gene1477	0.00791745	-0.00271396	0.0039271
peak1262	gene1478	-0.00176978	0.00221512	-0.00705377
peak1263	gene1479	-0.00773131	0.00512445	0.00535299
peak1264	gene1480	0.0028949	0.000205108	0.00444868
peak1265	gene1480	-0.00678479	0.00325316	0.00294607
peak1266	gene1480	0.00480467	-0.000952085	0.00336385
peak1267	gene1482	0.00307641	-0.00465095	0.00639187
peak1268	gene1482	0.00274391	0.00219301	0.00608107
peak1269	NA	0.00541441	0.00336274	0.000186845
peak1270	NA	0.000825422	-0.015001	0.00220425
peak1271	NA	-0.000941998	-0.00112524	-0.000671393
peak1272	NA	0.00344986	-0.00084401	-0.0078798
peak1273	gene1484	0.00264822	0.000386413	0.00870262
peak1274	gene1484	0.000130868	-0.00148224	0.0107585
peak1275	gene1484	0.000943671	0.00842208	0.00645374
peak1276	gene1484	-0.00215052	-0.00403793	0.00768753
peak1277	gene1484	0.00150496	-0.00379896	0.00238964
peak1278	gene1484	-0.0170549	0.0104463	-0.0154156
peak1279	gene1484	-0.000774182	-0.00225262	0.0107563
peak1280	gene1489	0.00533677	-0.0029527	-0.0107942
peak1281	gene1490	0.00389535	-0.00648171	-0.00615575
peak1282	gene1491	0.0160035	-0.0219975	-0.0162969
peak1283	gene1491	-0.0154143	0.0032385	-0.00810496
peak1284	gene1494	0.00584863	-0.000741176	-0.0034552
peak1285	gene1494	0.00735666	-0.00679571	-0.0135428
peak1286	gene1497	-0.0213803	0.00699721	-0.012626
peak1287	gene1500	0.00629221	-0.00530828	-0.00808602
peak1288	gene1503	0.000186075	-0.000726959	0.00266806
peak1289	gene1503	-0.00409094	0.00703891	-0.00108372
peak1290	gene1503	-0.00190599	0.0158582	0.0051169
peak1291	gene1503	-0.0186663	-0.00500633	-0.00671897
peak1292	gene1505	-0.00330206	-0.00180868	0.000290225
peak1293	gene1506	-0.00399037	0.00741123	-0.0068564
peak1294	gene1508	0.0149806	-0.0135258	-0.0141283
peak1295	gene1511	-0.00182115	0.000358053	0.00240092
peak1296	gene1512	0.00134345	-0.00220875	0.00529274
peak1297	gene1512	-0.00410416	0.00140213	0.00168493
peak1298	gene1512	0.0032155	0.00325441	-0.00350643
peak1299	NA	-0.0202051	-0.000873937	-0.00545502
peak1300	gene1517	-0.00809961	0.0026865	0.00161405
peak1301	gene1517	-0.00134756	8.49818e-05	0.00966233
peak1302	gene1517	-0.0252753	-0.00962511	-0.0103487
peak1303	gene1517	0.00180899	-0.00408663	0.00809497
peak1304	gene1517	0.00148793	-0.00561814	0.00901571
peak1305	gene1517	-0.0135817	-0.00174477	-0.00690805
peak1306	gene1517	0.00281088	-0.00235539	0.0112858
peak1307	gene1517	0.00676551	0.00536695	0.00680079
peak1308	gene1517	-0.00197707	-0.000233028	0.0127194
peak1309	gene1517	-0.0152231	0.0031606	0.0012707
peak1310	gene1517	-0.012373	-0.000678151	0.00443076
peak1311	gene1517	0.00127039	0.00735731	-0.00315072
peak1312	gene1517	0.0022237	-0.00367401	0.0104527
peak1313	gene1519	0.00747011	-0.00612256	-0.0118848
peak1314	gene1521	0.00983233	-0.0128567	-0.00133333
peak1315	gene1522	0.0085194	-0.0109258	-0.0122016
peak1316	gene1523	-0.00466233	0.000753849	-0.0105096
peak1317	gene1525	0.00497047	-0.000643431	0.0108586
peak1318	gene1525	-0.0191813	0.0113648	0.0039178
peak1319	gene1525	0.00511425	-0.0128937	0.00444742
peak1320	NA	-0.00565943	0.000224309	-0.00105627
peak1321	NA	-0.00299618	-0.0076358	-0.0154962
peak1322	NA	-0.00134074	0.000204266	0.00898362
peak1323	gene1526	-0.00729887	1.01073e-06	0.00817227
peak1324	gene1527	-0.00413675	0.0110882	0.00877844
peak1325	gene1528	-0.00666267	0.00582116	-0.0136061
peak1326	NA	-0.0031066	0.000400883	-0.00709314
peak1327	gene1529	-0.00712666	0.00161322	0.000766741
peak1328	gene1530	-0.0118345	0.00969588	-0.00643986
peak1329	gene1531	-0.00464134	0.00367669	0.00698736
peak1330	gene1531	0.00804859	-0.00958128	-0.0162138
peak1331	gene1532	0.0141447	-0.00925386	0.00226853
peak1332	gene1532	0.00408512	-0.00769631	-0.000455072
peak1333	gene1533	0.000669932	0.00178299	0.00865517
peak1334	gene1533	0.00327674	0.00211361	0.0135524
peak1335	gene1533	-0.0184159	0.00819915	0.00352702
peak1336	gene1533	-0.00628865	0.00478862	0.00217994
peak1337	gene1533	-0.0160737	0.014687	-0.0109252
peak1338	gene1534	-0.000896044	0.0022887	0.0127149
peak1339	gene1534	0.00737821	-0.00330351	-0.00520425
peak1340	gene1537	0.00729156	-0.00257699	0.0142695
peak1341	gene1537	0.00173234	0.00163364	0.00138631
peak1342	gene1538	0.00426366	-0.0029766	-0.0123226
peak1343	gene1537	-0.00999732	0.00541452	-0.0149277
peak1344	gene1537	0.00664969	0.00488384	-0.00213916
peak1345	gene1537	0.00990378	-0.0045014	-0.0152373
peak1346	gene1537	-0.00207648	-0.00278381	-0.014801
peak1347	gene1537	-0.00464753	0.00348776	-0.00271226
peak1348	gene1539	-0.00258852	-0.00468871	0.00478835
peak1349	gene1539	0.000708037	0.00695508	0.007114
peak1350	gene1539	-0.0037045	0.00259849	-0.00159785
peak1351	gene1540	-0.0006774	-0.00163527	0.00531312
peak1352	gene1541	-0.00940762	0.0112806	-0.00371372
peak1353	gene1544	0.0048908	-0.00576434	-0.0139377
peak1354	gene1546	0.000772668	-0.00184749	0.00887647
peak1355	gene1546	-0.009109	0.00956806	-7.63811e-05
peak1356	gene1547	-0.00357239	0.00173987	-0.00221386
peak1357	gene1549	0.0103431	-0.00501759	-0.00985956
peak1358	gene1551	0.00571228	0.00122691	0.0119972
peak1359	gene1552	-0.000229884	0.0010105	-0.00333198
peak1360	gene1551	0.00428894	-0.00107427	0.00705082
peak1361	gene1552	-0.00263713	-0.00149672	0.0157839
peak1362	gene1552	0.00176533	-0.00197889	0.0154328
peak1363	NA	-0.00255866	-0.00318714	0.010654
peak1364	NA	-0.017317	-0.00463765	0.00536192
peak1365	gene1554	-0.0280366	-0.0125561	0.0136192
peak1366	gene1553	-0.0222743	-0.0143741	0.00577596
peak1367	gene1554	-0.0127657	-0.00330934	0.0097803
peak1368	gene1555	-0.021893	0.0147827	-0.00223653
peak1369	gene1556	-0.00424492	-0.00100494	-0.00993095
peak1370	gene1557	-0.00170083	0.00373342	-0.00673819
peak1371	gene1564	-0.00490038	0.00755049	-0.0111404
peak1372	gene1565	0.0101917	-0.0095722	-0.00537052
peak1373	gene1567	-0.000621496	0.00375579	-0.00202631
peak1374	gene1567	0.00942804	0.00493808	0.00402203
peak1375	gene1568	-0.00124525	-0.00508419	-0.0142906
peak1376	gene1567	-0.000455268	0.00645333	-0.000808121
peak1377	gene1568	-0.00497436	0.00513071	0.00541048
peak1378	gene1571	0.0152679	0.0420752	-0.00776882
peak1379	gene1576	0.00302627	-0.00494074	-0.0154537
peak1380	gene1576	0.00497491	0.00999993	0.000504684
peak1381	gene1576	0.0071458	0.00075242	0.00490114
peak1382	gene1576	-0.00699711	0.0135672	-0.00780399
peak1383	gene1576	-0.00827854	-0.000962039	0.00208352
peak1384	gene1576	-0.00969178	0.00877292	-0.00423293
peak1385	gene1576	-0.000391599	0.0267308	-0.0109473
peak1386	gene1576	0.000980737	-0.00246391	0.00622349
peak1387	gene1576	-0.0102816	0.00606007	0.000520274
peak1388	gene1576	-0.10462	-0.0959081	-0.00350964
peak1389	gene1576	-0.00177629	-0.00728372	0.00145087
peak1390	gene1576	-0.00059008	0.00748704	0.00251713
peak1391	gene1576	-0.00389436	0.00826851	0.000341776
peak1392	gene1576	-0.0148995	0.0224349	0.00814399
peak1393	gene1576	-0.0115779	-0.00128939	0.00399244
peak1394	gene1576	-0.00441657	-0.00471397	0.00838425
peak1395	gene1582	0.00830869	-0.00857019	-0.00134548
peak1396	gene1582	0.0096449	0.00204932	-0.000410554
peak1397	gene1584	0.00194076	-0.00111091	-0.00545132
peak1398	gene1585	0.00998126	0.000892057	-0.00134119
peak1399	gene1587	-0.00143513	0.0132325	0.00140438
peak1400	gene1587	0.00568709	0.00454104	0.00432098
peak1401	gene1588	0.00162759	0.0123932	-0.00247821
peak1402	gene1589	0.0119349	-0.000981243	-0.00969161
peak1403	gene1590	0.00883705	-0.00494057	-0.00154566
peak1404	gene1590	-0.000668544	-0.00623069	0.00998111
peak1405	gene1590	0.00719203	-0.00348593	-0.012615
peak1406	gene1590	-0.00191126	-0.00076302	-0.00655975
peak1407	gene1590	-0.0154902	0.00271234	0.000300839
peak1408	gene1590	-0.000786204	-0.00423049	3.09033e-05
peak1409	gene1590	-0.00741502	0.000226229	0.00467104
peak1410	gene1590	0.00112817	0.00467953	0.00498932
peak1411	gene1591	0.00707712	-0.00520513	0.0184151
peak1412	gene1591	0.000747352	-0.00781904	0.0172264
peak1413	gene1591	-0.00423792	0.00628758	0.00211104
peak1414	gene1590	0.0034982	0.00590604	-0.00230482
peak1415	gene1590	-0.00343672	-0.00380642	0.00278831
peak1416	gene1590	0.00142886	-0.000286114	-0.00833295
peak1417	gene1593	-0.000331569	-0.0033088	0.00135928
peak1418	gene1599	-0.0268214	0.0115144	-0.00200633
peak1419	NA	-0.0012205	0.00608522	0.00279321
peak1420	NA	-0.000952807	0.00631287	0.00180459
peak1421	gene1605	-0.00214493	0.0227548	-0.0243073
peak1422	gene1605	-0.00490546	0.0105526	-0.00107634
peak1423	gene1605	-0.00133227	0.004412	-7.03945e-05
peak1424	gene1608	-0.00893742	0.0143386	-0.00988049
peak1425	gene1609	-0.00305711	0.00184064	-0.0148634
peak1426	gene1610	0.00755406	0.00109284	0.000361059
peak1427	gene1612	0.00875131	0.00038814	0.00933851
peak1428	gene1614	0.00986126	-0.00937279	-0.00437293
peak1429	gene1614	0.00271069	-0.00479092	-0.00448707
peak1430	NA	0.00932941	0.000716317	-0.00161166
peak1431	NA	0.00854596	-0.00648342	0.0104694
peak1432	NA	-0.00573192	-0.00575529	-0.00505873
peak1433	NA	0.00650199	-0.0152541	-0.00360481
peak1434	NA	-0.00307548	0.0113289	0.00313491
peak1435	gene1615	-0.0235147	0.016745	-0.0154886
peak1436	gene1615	0.00211541	0.00277581	-0.000703688
peak1437	gene1616	0.00831436	-0.00373221	-0.00189569
peak1438	gene1616	0.0167047	-0.0156501	-0.0202176
peak1439	gene1622	0.00812614	0.00210622	-0.017328
peak1440	gene1625	-0.00120886	0.00450294	0.00828235
peak1441	gene1626	0.00333029	4.68105e-05	0.00428151
peak1442	gene1628	0.0142883	-0.00700639	-0.00424496
peak1443	gene1629	0.00939898	-0.000355375	-0.00717295
peak1444	gene1631	-0.0176461	0.0123334	-0.0138235
peak1445	gene1631	0.0115177	-0.00461182	0.00607143
peak1446	gene1633	-0.00133396	0.00155777	0.01101
peak1447	gene1633	0.00175868	0.0032068	0.0148015
peak1448	gene1636	0.127413	0.103311	0.0137957
peak1449	gene1638	0.00262611	0.00193621	-0.00335327
peak1450	gene1638	0.00288362	-0.00545969	0.00897746
peak1451	gene1639	0.0168031	-0.0240638	-0.0208979
peak1452	gene1643	0.00218456	0.00329226	0.00544037
peak1453	gene1650	0.00411983	0.000283726	-0.00576787
peak1454	gene1652	-0.00768939	0.0219799	0.00550958
peak1455	gene1654	0.00722272	-0.00598056	-0.000789783
peak1456	gene1657	-0.0135	0.0155095	-0.0104466
peak1457	gene1658	0.000970493	0.00552704	-0.0129901
peak1458	gene1660	-0.00255319	0.00373457	-0.00375098
peak1459	gene1659	-0.00896961	-0.00920861	0.00464598
peak1460	gene1659	-0.00295577	0.00279513	0.00605063
peak1461	NA	-0.00456833	-0.00117522	0.00908372
peak1462	NA	-0.00273575	0.00602084	0.00473496
peak1463	NA	-0.00654647	0.000168501	0.00441632
peak1464	NA	-0.00295471	-0.00122442	0.00976383
peak1465	NA	-0.00424676	0.00505241	-0.00225659
peak1466	NA	-0.00706148	0.00801514	0.000337043
peak1467	gene1661	-0.00766253	0.000839004	-0.00222877
peak1468	gene1661	0.00178392	0.00501356	0.00994998
peak1469	gene1661	-0.00153157	0.00558218	0.00940677
peak1470	gene1661	-0.00710522	0.00801863	-0.00164093
peak1471	gene1661	-0.00461061	0.00456966	0.000877997
peak1472	gene1661	-0.00695679	0.00984361	-0.00114338
peak1473	gene1661	-0.00494697	0.0088598	-0.000148397
peak1474	gene1661	-0.00444246	0.00525393	0.00391958
peak1475	gene1661	-0.00428213	0.00237227	0.00609741
peak1476	gene1662	0.000493709	0.00173412	-0.016044
peak1477	gene1662	-0.00840548	0.00156049	-0.0194166
peak1478	gene1664	-0.00235385	0.00858486	-0.0128114
peak1479	gene1669	-0.012798	0.00201173	-0.0075009
peak1480	gene1669	-0.0079199	0.00382604	0.000796539
peak1481	gene1669	-0.00234894	-0.00112649	0.00438092
peak1482	gene1678	0.00225541	0.0094753	0.00922744
peak1483	gene1678	-0.00468301	-0.00109436	0.00810608
peak1484	gene1678	-0.0150115	0.019143	-0.0101938
peak1485	NA	0.00600869	-0.0208401	0.0152983
peak1486	gene1679	0.0143356	-0.00561416	0.0109954
peak1487	gene1679	0.00845327	-0.00805837	-0.0155486
peak1488	gene1679	-0.00401973	0.000625027	0.00705221
peak1489	gene1679	-0.00663638	0.0128174	-0.000184241
peak1490	gene1679	-0.0144586	0.0155316	-0.000254122
peak1491	gene1679	0.00268952	0.0010758	-0.000613528
peak1492	gene1681	0.00134772	0.00307498	-0.00114547
peak1493	gene1680	0.0105351	0.00299423	-0.0100998
peak1494	gene1683	-0.0166104	0.00683215	-0.0344877
peak1495	gene1684	-0.00847635	0.000954661	-0.0150662
peak1496	gene1684	-0.012056	0.00692235	-0.0182135
peak1497	gene1684	-0.0181416	0.0154201	-0.025538
peak1498	gene1684	-0.0158922	0.00169836	-0.0117458
peak1499	gene1691	0.00848319	-0.00580591	0.00151519
peak1500	gene1692	0.0048273	0.0113715	0.00415736
peak1501	gene1694	0.0174386	-0.0128885	-0.0135362
peak1502	gene1693	0.00401329	0.000268922	0.000452084
peak1503	gene1696	-0.00552832	-0.0220938	0.0238331
peak1504	gene1696	0.00874218	-0.00374225	0.0230374
peak1505	gene1696	-0.00865482	-0.0222723	0.0230586
peak1506	gene1696	-0.00746507	-0.0311961	0.0293546
peak1507	gene1696	-0.0139738	0.0210896	-0.00169251
peak1508	gene1696	-0.0209901	0.016311	0.00556885
peak1509	gene1696	-0.0130027	0.0123685	-0.00961483
peak1510	gene1696	0.0042149	0.00232481	0.00862931
peak1511	gene1702	0.00160462	-0.000465628	0.00588649
peak1512	gene1704	0.0138902	-0.0184743	0.00360204
peak1513	gene1704	-0.00402314	0.00577885	0.00232543
peak1514	gene1705	0.00280708	0.00503117	-0.01046
peak1515	gene1705	0.0027579	0.00244661	0.00600828
peak1516	gene1706	0.00359251	0.0045755	0.00422414
peak1517	gene1706	0.00254014	-0.0104284	-0.00179522
peak1518	gene1708	0.0128688	-0.00294809	-0.00218198
peak1519	gene1708	0.00882144	0.00789993	0.00121136
peak1520	gene1711	0.00580281	0.000981971	-0.00116149
peak1521	gene1717	0.00565934	-0.00345139	-0.00354826
peak1522	gene1717	0.0192364	-0.0147751	0.0045781
peak1523	gene1720	0.000200189	0.00668014	-0.00621832
peak1524	gene1722	-0.00114381	0.00116185	0.00601941
peak1525	gene1722	-0.00201228	0.00358676	-0.00566818
peak1526	gene1722	0.00767917	-0.00740802	-0.000186053
peak1527	gene1722	0.00371983	-0.00322549	0.00909314
peak1528	gene1724	0.00586825	0.00515614	-0.00254536
peak1529	gene1725	0.00199302	0.00374419	0.00868723
peak1530	gene1725	-0.00424433	0.00676601	0.000376587
peak1531	gene1727	-0.00616155	0.00446528	0.000734889
peak1532	gene1725	0.00109012	0.00391701	-0.00186319
peak1533	gene1725	0.00203452	-0.00213229	-0.0020202
peak1534	gene1727	0.00286933	0.00158815	-0.0085712
peak1535	gene1727	-0.00629216	0.00582137	0.00147681
peak1536	gene1726	-0.00500351	-0.000964028	-0.00361191
peak1537	gene1726	-0.000365457	-0.00140852	0.00688067
peak1538	gene1727	0.00927499	-0.00407184	0.004689
peak1539	gene1729	0.00210028	0.00121924	0.0089687
peak1540	gene1729	0.00267258	0.00311291	0.00463362
peak1541	gene1731	0.00571624	0.00721068	0.000795806
peak1542	gene1731	0.00845505	0.00238192	-0.00219819
peak1543	gene1732	0.00727604	-0.00474259	0.000781947
peak1544	gene1733	-0.011558	0.0212142	-0.0100202
peak1545	gene1733	0.0104719	0.00204333	-0.0288953
peak1546	gene1734	0.0120358	-0.0127838	-0.0293673
peak1547	gene1736	0.00525966	-0.00152643	0.00888488
peak1548	gene1737	0.0075124	-0.00213944	0.0135782
peak1549	gene1738	0.0111125	-0.00432653	0.00139221
peak1550	gene1739	0.0029879	-0.00420048	0.0116338
peak1551	gene1740	0.00329599	-0.0013787	0.00489885
peak1552	gene1741	0.000761337	0.00204762	0.000737169
peak1553	gene1741	-0.0101452	0.00499943	0.00179503
peak1554	gene1741	0.00118205	0.00242943	0.000515648
peak1555	gene1741	0.00788255	0.00202722	-0.0117814
peak1556	gene1741	0.00988251	-0.0114541	-0.00874291
peak1557	NA	0.00439438	0.00300072	-0.00398635
peak1558	NA	-0.0150263	0.00657317	-0.00205538
peak1559	gene1745	0.00131466	-0.00183065	0.00815069
peak1560	gene1745	0.00219572	-0.0118831	0.00529099
peak1561	gene1745	-0.0269091	-0.0027298	-0.00848917
peak1562	gene1745	0.00387127	-0.00858598	0.0211739
peak1563	gene1745	-0.00911389	-0.0275112	0.0239836
peak1564	gene1745	0.00607778	-0.00414859	0.0221389
peak1565	gene1747	0.00355713	-0.0109842	-0.00758619
peak1566	gene1748	0.000318719	0.00235361	0.00609733
peak1567	gene1749	0.0155538	-0.00225175	0.0168204
peak1568	gene1752	-0.00629992	-0.00220302	0.0115606
peak1569	gene1752	-0.00551353	-0.00123799	0.00955174
peak1570	gene1752	0.000231477	1.26815e-05	0.0122341
peak1571	gene1753	0.00115229	-0.0271198	-0.00181407
peak1572	gene1755	0.000334959	0.00978057	-0.00188203
peak1573	gene1758	0.00788125	0.00498036	-0.00846357
peak1574	gene1759	0.000340755	-0.00552979	0.00210784
peak1575	gene1759	0.0194204	-0.0239867	0.00260377
peak1576	gene1761	0.00370812	-0.00459768	0.0025809
peak1577	gene1761	-0.00595357	0.00752379	-0.00991171
peak1578	gene1761	0.00105169	-0.00130017	0.00878186
peak1579	gene1761	0.00372515	0.0193298	0.00534388
peak1580	gene1761	0.00451675	0.00690599	0.0196318
peak1581	gene1761	-0.00844182	0.0187365	-0.00904778
peak1582	gene1763	0.00343188	-0.0138005	-0.00369057
peak1583	gene1764	-0.0076338	0.000444429	-0.0165605
peak1584	gene1764	0.0050546	-0.00359257	0.00681238
peak1585	gene1764	0.00490039	-0.0128529	-0.00111409
peak1586	gene1764	0.000373436	-0.00966422	0.00424677
peak1587	gene1764	-0.0118759	0.00212333	0.00928039
peak1588	gene1766	0.0183132	-0.010455	0.010055
peak1589	gene1769	0.000139704	0.00325355	-0.00101412
peak1590	gene1769	-0.00420948	0.0107843	0.00749622
peak1591	gene1769	0.00122848	0.00175626	-0.00522151
peak1592	gene1769	-0.0112239	-0.0294453	0.0218566
peak1593	gene1771	0.00759837	-0.00562437	0.000808021
peak1594	gene1771	0.00974669	-0.00194459	-0.00730947
peak1595	gene1772	0.0124644	-0.0167959	-0.00824159
peak1596	gene1773	-0.00129925	0.00407922	0.00875629
peak1597	gene1773	-0.0177801	-0.0311217	0.0268028
peak1598	gene1777	-0.0357652	0.0314516	0.0118125
peak1599	gene1778	0.0045288	0.00358221	-0.00713602
peak1600	gene1786	0.0113616	-0.000873606	-0.0114396
peak1601	gene1789	0.012004	-0.00282836	-0.012021
peak1602	gene1792	0.00893355	-0.00403411	0.00316843
peak1603	gene1792	0.00153141	0.0111231	-0.00560567
peak1604	gene1795	0.0174554	-0.027334	0.00649172
peak1605	gene1795	0.00795907	-0.00685855	-0.016396
peak1606	gene1796	0.00336642	0.00850977	0.00159704
peak1607	gene1797	0.0101534	-0.00729363	-0.0122424
peak1608	gene1798	0.0110459	-0.003884	-0.000205609
peak1609	gene1800	0.00502153	-0.00064329	0.00606679
peak1610	gene1801	0.0260875	-0.0235462	0.0059524
peak1611	gene1801	0.0244758	-0.024134	0.0111874
peak1612	gene1801	0.00264128	-0.00760538	-0.0164393
peak1613	gene1804	-0.0102175	-0.00228653	-0.0085682
peak1614	gene1804	-0.00737194	0.00686618	-0.0023091
peak1615	gene1805	-0.00121454	0.00593446	0.000231069
peak1616	gene1806	0.00684219	-0.0183315	0.0197387
peak1617	gene1809	0.0262666	-0.0235404	-0.0442741
peak1618	gene1810	0.00453317	0.000885055	-0.000780832
peak1619	gene1812	0.0126016	-0.00367808	-0.00598457
peak1620	gene1814	0.00725571	-0.0102267	-0.00588262
peak1621	gene1814	0.0148689	-0.0212114	0.00234807
peak1622	gene1819	-0.00860516	0.0089735	-0.00255366
peak1623	gene1819	-0.00418155	0.00777661	0.00300166
peak1624	gene1821	0.00218052	0.00515504	0.0083581
peak1625	gene1824	-0.00379945	-0.00464471	0.00259779
peak1626	gene1825	0.00646683	0.00109938	-0.0132498
peak1627	gene1828	0.0072839	-0.000468961	0.00184798
peak1628	gene1829	-0.000597002	0.00284467	0.00568961
peak1629	gene1829	0.0215222	-0.0215612	0.0121133
peak1630	gene1829	0.0124865	-0.0222012	0.0133787
peak1631	gene1830	-0.00677813	0.018958	-0.02591
peak1632	gene1830	-0.00145982	0.00293642	0.00631958
peak1633	gene1830	-0.00753656	0.00957002	-0.0029041
peak1634	gene1832	0.00585695	-0.00928228	-0.0068585
peak1635	gene1832	-0.00313226	-0.000816558	-0.0104608
peak1636	gene1833	0.00810655	-0.0143942	-0.0065481
peak1637	gene1841	0.00156347	0.00259458	-0.0103653
peak1638	gene1844	0.00767442	-0.00074197	-0.00744282
peak1639	gene1846	-0.000804999	-0.00511575	-0.000732698
peak1640	gene1848	0.0154978	-0.00562078	0.0118532
peak1641	gene1848	-0.0186014	-0.00331111	-0.00826995
peak1642	NA	-0.00773813	0.00399289	-0.00373094
peak1643	gene1849	-0.00664923	0.0116303	0.00261592
peak1644	gene1849	-0.00283508	-0.00553595	0.00510748
peak1645	gene1849	-0.000833955	0.00650017	0.00291964
peak1646	gene1849	-0.00434465	0.00691696	0.000584332
peak1647	gene1849	-0.0100944	0.00172372	-0.00591433
peak1648	gene1849	0.00574111	-0.00169762	0.0117688
peak1649	gene1849	-0.0083925	-0.0064137	0.006737
peak1650	gene1849	0.00254005	0.00155984	0.011472
peak1651	gene1849	-0.00639933	0.00404174	0.00563327
peak1652	gene1849	-0.00483173	0.00624894	0.00299685
peak1653	gene1849	6.37196e-05	0.0074215	0.0043267
peak1654	gene1849	-0.00071898	-0.00451603	0.00804374
peak1655	gene1849	0.00284237	0.0209118	0.0125672
peak1656	gene1849	-0.00600057	0.0124846	-0.00145793
peak1657	gene1849	0.0021282	0.00302467	0.0100254
peak1658	gene1849	-0.00782408	-0.00468426	0.00742085
peak1659	gene1849	-0.0113996	-0.000685737	0.00219757
peak1660	gene1849	-0.013161	0.00797115	0.000634487
peak1661	gene1853	-0.0145421	0.00195555	-0.0197412
peak1662	gene1854	0.00548474	-0.00840288	-0.00147727
peak1663	gene1854	-0.0081237	0.000693581	-0.00246778
peak1664	gene1855	-0.0126936	0.000815487	-0.0107216
peak1665	gene1855	-0.00788318	-0.00238682	0.00523683
peak1666	gene1855	-0.00894396	0.000627018	-0.000622116
peak1667	gene1855	0.00581128	0.00364331	-0.0110851
peak1668	gene1855	-0.0169593	0.012103	-0.0216366
peak1669	gene1855	-0.0151831	0.0114838	-0.00606893
peak1670	gene1857	-0.0118695	0.00738592	-0.00680996
peak1671	gene1857	0.0106898	-0.0149278	-0.0205837
peak1672	gene1857	0.00197795	-0.00180037	-0.00024342
peak1673	gene1862	-0.00722882	0.00877821	-0.00474675
peak1674	gene1867	0.00775026	-0.0162201	-0.0270158
peak1675	gene1868	0.00198605	-0.0077787	0.0152692
peak1676	NA	-0.00765013	0.00663446	0.0121727
peak1677	gene1870	0.000937774	0.000675548	0.00858248
peak1678	NA	-0.00364504	-0.00238107	0.00460254
peak1679	gene1872	-0.00543205	0.00541872	0.00583678
peak1680	gene1874	0.00718813	-0.00387768	-0.0137874
peak1681	gene1877	0.000516036	0.000998409	0.010282
peak1682	gene1878	0.000262422	0.000709412	-0.000554086
peak1683	NA	0.00551646	-0.0086862	3.47806e-05
peak1684	NA	-0.00223964	0.0115558	-0.00414735
peak1685	gene1879	-0.00169262	0.00513996	-0.00215687
peak1686	gene1879	0.00977909	-0.00326306	-0.00667927
peak1687	gene1879	0.0041426	-0.00121357	0.00827042
peak1688	gene1881	0.0064565	0.00162301	-0.00305769
peak1689	gene1886	0.00419537	0.00167906	-0.00708543
peak1690	gene1885	0.0105069	-0.012918	-0.00611158
peak1691	gene1885	0.00717953	-0.0121839	-0.0102379
peak1692	gene1887	0.0067872	-0.00362854	-0.00102058
peak1693	gene1887	0.00408113	0.00241261	-0.00158438
peak1694	gene1887	0.00082973	0.00370365	-0.00622728
peak1695	gene1888	0.01343	-0.0137758	-0.0197626
peak1696	gene1888	-0.00101671	0.000206189	-0.00378523
peak1697	gene1890	0.0113039	-0.00697106	-0.00146711
peak1698	gene1891	0.00736364	0.000722641	-0.00372318
peak1699	gene1891	0.00302231	-0.000900202	0.00584925
peak1700	gene1897	0.00963263	-0.00430077	0.000699211
peak1701	gene1898	0.00307206	-0.00405722	-0.00561472
peak1702	gene1898	0.00186626	0.00776313	-0.00235858
peak1703	gene1905	0.0134608	-0.0131802	-0.010826
peak1704	gene1907	0.00683811	-0.00206217	-0.0171277
peak1705	gene1909	0.0167783	0.00508076	-0.0100234
peak1706	gene1909	-0.00267865	-0.000237004	0.0129022
peak1707	gene1909	-0.00464553	-0.00287782	0.00756641
peak1708	gene1909	-0.0116189	0.00903233	0.000279797
peak1709	gene1910	-0.00740488	0.0111867	0.00249807
peak1710	gene1910	0.00180705	0.00777504	-0.0164944
peak1711	gene1912	0.00503239	-0.00702693	0.00105628
peak1712	gene1914	0.0052637	-0.00138743	0.00704197
peak1713	gene1914	0.00709244	-0.00128606	0.0119387
peak1714	gene1916	0.00808982	-0.0080597	0.00560802
peak1715	gene1918	0.00734305	-0.00492559	-0.0036577
peak1716	gene1918	0.00617696	-0.00359426	-0.00823407
peak1717	gene1917	-0.00604052	0.00426088	-0.00848687
peak1718	gene1954	-0.0105349	0.000728692	0.0059919
peak1719	gene1977	-0.0302514	0.0219672	0.00968704
peak1720	gene1989	0.00685233	0.00764415	-0.00253222
peak1721	gene1989	0.0139531	-0.00236749	-0.00206289
peak1722	gene1992	0.0146392	-0.00804271	-0.00257619
peak1723	gene1993	0.010527	-0.0108442	-0.00973641
peak1724	gene1994	0.00567552	0.00412858	0.00982116
peak1725	gene1994	-0.0101133	-0.00202025	0.0041639
peak1726	gene1998	0.00127986	-0.00364414	0.00257883
peak1727	gene1998	0.00336783	-0.00240985	-0.00279878
peak1728	gene1998	0.00799925	0.00509774	0.00272551
peak1729	gene1998	0.0107557	-0.00683314	0.0011793
peak1730	gene1999	0.00218285	0.000831212	0.00278358
peak1731	gene1999	-0.00582692	0.00482164	0.00337619
peak1732	gene1999	0.000429338	0.00651498	0.00534272
peak1733	gene1999	-0.0012594	0.010446	0.000563537
peak1734	gene1999	0.00106412	0.000902544	0.0111247
peak1735	gene2003	-0.00691579	0.000688686	0.000967656
peak1736	gene2005	-0.00700996	0.00296658	-0.00629153
peak1737	gene2003	0.00598102	-0.00479554	-0.00311983
peak1738	gene2005	0.00444711	-0.000578878	0.00578494
peak1739	gene2007	-0.00309791	0.00940868	-0.0094048
peak1740	gene2008	0.00973673	0.00581412	-0.00761841
peak1741	gene2011	-0.00132375	-0.00215768	-0.00836132
peak1742	gene2015	0.00731824	0.00385261	0.00274187
peak1743	gene2017	0.00460738	-0.00665027	0.00393537
peak1744	gene2017	-0.00219168	0.0135095	-0.00381814
peak1745	gene2017	-0.00108425	0.0085739	-0.00249385
peak1746	gene2020	0.00494639	0.002109	-0.0084056
peak1747	gene2021	0.00600529	-0.00310155	-0.00332208
peak1748	gene2021	0.00768161	-0.0116744	-0.0213927
peak1749	gene2022	0.00887748	-0.0117556	-0.00663465
peak1750	gene2023	0.0164987	-0.0151987	-0.0110118
peak1751	gene2024	0.0169918	-0.00843187	-0.00265366
peak1752	gene2031	0.00707977	-0.00680032	0.00792467
peak1753	gene2033	0.00826456	-0.0001114	0.00645725
peak1754	gene2030	0.0106474	-0.00997267	-0.00404298
peak1755	gene2034	-0.0047237	-0.020573	0.0145853
peak1756	gene2034	0.00195887	-0.00768862	0.0207717
peak1757	gene2034	0.00551674	-0.00326365	0.0182201
peak1758	NA	-0.00263189	-0.00506519	0.0161863
peak1759	gene2035	0.00126677	-0.00203667	0.0115014
peak1760	gene2039	-0.0022216	-0.0018568	0.0121663
peak1761	gene2048	0.00383509	-0.0103292	0.00269539
peak1762	gene2049	0.00109928	-0.00800284	0.00393672
peak1763	gene2041	-0.00143135	0.00372656	0.00388502
peak1764	gene2041	0.00150229	0.00276653	0.0120191
peak1765	gene2041	-7.04627e-05	-0.0107241	0.0153986
peak1766	gene2054	0.00589554	0.00516035	-0.00308816
peak1767	gene2055	-0.00103024	-0.000550852	0.00789506
peak1768	NA	-0.0129787	0.0138439	-0.00851703
peak1769	gene2058	0.00303964	-0.0121787	-0.00206962
peak1770	gene2059	-0.0112688	0.00033247	0.00991663
peak1771	gene2059	-0.00520371	-0.000893048	0.0074515
peak1772	gene2059	-0.00708112	0.00351904	0.00351116
peak1773	gene2059	-0.00380176	0.00370476	0.00322518
peak1774	gene2059	0.000492346	0.00753371	0.00286833
peak1775	gene2059	-0.00150012	-0.0022135	0.00740132
peak1776	gene2059	0.00613972	0.0039538	0.00165462
peak1777	gene2062	0.00760294	0.00699136	-0.00991571
peak1778	gene2063	0.00234766	0.00691935	-0.000557054
peak1779	gene2063	-0.00596957	-0.000287397	0.00167705
peak1780	gene2065	0.00182953	-0.00386555	0.00766698
peak1781	gene2065	0.00151035	-0.00298905	0.0131671
peak1782	gene2065	-0.00540546	0.000404338	0.00574895
peak1783	gene2065	-0.0122084	0.00479836	0.00359416
peak1784	gene2065	-0.00162419	0.00623631	0.00234084
peak1785	gene2065	-0.00163023	0.00443336	0.00751504
peak1786	gene2065	-0.00465962	-0.00339704	0.00248952
peak1787	gene2065	-0.00555231	0.00117102	0.00444311
peak1788	gene2065	-0.0143363	0.0126317	0.00559331
peak1789	gene2065	-0.00864424	0.0014097	0.00210548
peak1790	gene2065	-0.0123404	-0.00421761	-0.0128069
peak1791	gene2067	-0.0115786	-0.00174484	0.010292
peak1792	gene2068	-0.00378098	0.00939493	-0.00832169
peak1793	gene2068	0.00708436	0.0015609	0.00461343
peak1794	gene2069	0.00313077	0.00327681	0.00323081
peak1795	gene2072	0.0218535	-0.0255536	-0.028216
peak1796	gene2074	0.00952896	0.00678288	-0.0122977
peak1797	gene2075	-0.00700019	0.0038913	0.00848911
peak1798	gene2075	-0.0134781	0.00245688	-0.00259548
peak1799	gene2075	-0.000795512	0.000968198	0.0100759
peak1800	gene2075	-0.00216932	-0.00313635	0.00497859
peak1801	gene2076	-0.00350685	0.00124063	0.00486959
peak1802	gene2076	-0.00193367	-0.00100502	0.00513846
peak1803	gene2076	0.00994909	0.00179199	0.0122297
peak1804	gene2076	0.00748273	0.00701338	0.00589744
peak1805	gene2076	0.00665716	-0.00448991	0.0131756
peak1806	gene2076	0.00508122	0.00156997	0.0105273
peak1807	gene2076	-0.00316122	-0.00253447	0.013656
peak1808	gene2076	-0.00170275	0.00486454	0.00658836
peak1809	gene2076	0.00210686	-0.00402754	0.0101487
peak1810	gene2076	-0.00454338	-0.00273145	0.00982418
peak1811	gene2076	-0.000185227	0.00563378	0.00545159
peak1812	gene2078	0.00154564	-0.00533881	0.00373635
peak1813	gene2078	0.000295149	0.00273839	0.00565964
peak1814	gene2078	0.00462662	-0.000238533	0.0039613
peak1815	gene2081	0.00306003	0.00385939	-0.0184603
peak1816	gene2085	-0.000378863	0.0109378	-0.00511439
peak1817	gene2086	-0.000583841	0.00012795	0.00500606
peak1818	gene2086	-0.00445743	-0.00444636	0.00486215
peak1819	gene2086	0.00319648	0.00703334	0.014023
peak1820	gene2086	0.00270721	0.0027279	0.0169031
peak1821	gene2087	-0.000747695	0.00398343	0.0085148
peak1822	gene2087	-0.00310329	-0.00331698	0.00353469
peak1823	gene2092	-0.00186808	-0.00178829	0.00097545
peak1824	gene2089	-0.00308243	0.00185086	-0.0122042
peak1825	gene2092	0.00927468	0.00937789	-0.00762923
peak1826	gene2099	0.0131317	-0.011706	-0.0100431
peak1827	gene2098	0.0277728	-0.021185	0.00182141
peak1828	gene2098	0.0181304	-0.00984508	0.0171837
peak1829	gene2100	0.0208242	-0.0117984	0.0118052
peak1830	gene2100	0.0183739	-0.00961198	0.022096
peak1831	gene2100	0.0195237	-0.0145525	0.019527
peak1832	gene2100	0.0164582	-0.0052934	0.0184335
peak1833	gene2100	0.0186345	-0.00835461	0.0273756
peak1834	gene2100	0.0142815	-0.00882031	0.0271003
peak1835	gene2103	0.00757916	-0.00805332	0.0116521
peak1836	gene2101	0.0131985	-0.0161994	-0.00326541
peak1837	gene2102	-0.0076843	-0.0115469	0.00798028
peak1838	gene2105	-0.0132033	0.0047746	0.00602345
peak1839	gene2105	-0.00325741	-0.00112659	0.0100907
peak1840	gene2105	-0.00610921	0.0110205	0.00353498
peak1841	gene2105	-0.00519202	0.00368695	-0.00216723
peak1842	gene2105	0.000817523	-0.00388387	0.0155754
peak1843	gene2106	-5.73297e-05	0.00113203	-0.00090998
peak1844	gene2107	0.00994803	-0.00914272	-0.0277155
peak1845	gene2108	-0.00344279	0.00191508	0.00791862
peak1846	gene2111	0.00461851	0.000480149	0.001665
peak1847	gene2112	0.00250332	0.00600216	0.00900544
peak1848	gene2112	0.00198299	0.00491042	0.0124749
peak1849	gene2112	-0.00290588	0.00807559	-0.00740832
peak1850	gene2112	-0.0090051	0.00829583	-0.0104043
peak1851	gene2112	-0.000712462	0.00584226	0.00522388
peak1852	gene2112	-0.00524189	0.0109247	-0.0127225
peak1853	gene2112	-0.00407086	0.000786767	0.00185925
peak1854	gene2112	-0.00878429	0.000952388	-0.00937942
peak1855	gene2112	-0.00229773	-0.00314641	0.00779162
peak1856	gene2112	-0.00286105	-0.00246144	0.00865613
peak1857	gene2113	-0.00580009	0.00740869	-0.00487191
peak1858	gene2113	0.0015171	0.00842925	0.0027433
peak1859	gene2113	-0.00230663	-0.00398512	0.00818287
peak1860	gene2114	0.00808268	-0.0120005	0.00442682
peak1861	gene2113	-0.00184553	0.0117302	-0.00132615
peak1862	gene2113	-0.00278051	-2.98426e-05	0.00606044
peak1863	gene2113	-0.00113288	-0.000936968	0.0107416
peak1864	gene2113	-0.004652	0.000942918	0.00699623
peak1865	gene2113	-0.00449161	0.00388803	0.00355384
peak1866	gene2113	-0.00395475	-0.00134397	0.0114608
peak1867	gene2113	-0.000306039	-0.00142626	0.0136344
peak1868	gene2113	-0.00573003	0.00438478	0.0028953
peak1869	gene2113	0.000331688	0.000785273	0.00488373
peak1870	gene2113	-0.0124711	0.00717679	-0.00355641
peak1871	gene2116	0.00136954	0.00152448	-0.00446629
peak1872	gene2116	-0.00139218	0.00100954	0.0062157
peak1873	gene2116	0.00305722	0.0014666	0.00228705
peak1874	gene2121	0.0113138	-0.0127405	-0.0133115
peak1875	gene2125	0.000327721	-0.00134763	0.00372172
peak1876	gene2127	-0.00917459	0.00960887	-0.0211063
peak1877	gene2130	0.00670014	-0.00708077	0.000123179
peak1878	gene2131	0.00147501	-0.00501275	0.00334557
peak1879	gene2131	-0.00538823	0.00978992	0.00227307
peak1880	gene2131	-0.00286181	0.00456195	-0.00851661
peak1881	gene2132	-0.000740763	-0.000791865	0.00641385
peak1882	gene2135	0.0111543	-0.0109082	-0.00703558
peak1883	gene2137	0.00529765	0.00022013	-0.00496032
peak1884	gene2138	0.00711933	-0.011209	-0.0194673
peak1885	gene2142	0.00749557	-0.0087016	-0.019973
peak1886	gene2142	0.00797495	-0.00251707	-0.0122283
peak1887	gene2143	-0.000539456	0.0110189	-0.00221517
peak1888	gene2144	0.000558508	-0.00255059	0.010527
peak1889	gene2144	-0.00573688	0.00764474	-0.0046975
peak1890	gene2147	-0.00147992	-0.00224128	0.00579722
peak1891	gene2147	-0.00299822	0.0175779	-0.004904
peak1892	gene2147	-0.00795124	-0.00573322	0.0136161
peak1893	gene2147	-0.0179696	0.00937429	-0.0115785
peak1894	gene2147	-3.01922e-05	0.00387377	0.0032402
peak1895	gene2147	0.00387872	-0.00508235	-0.00820498
peak1896	gene2147	-0.00103333	-0.00130546	0.00560995
peak1897	gene2147	-0.00263292	-0.00263294	-0.00626853
peak1898	gene2147	0.00239572	-0.00372013	-0.0034404
peak1899	gene2147	-0.00690207	-0.00112076	-0.00177014
peak1900	gene2147	0.00191348	-0.00279815	0.00497789
peak1901	gene2147	0.00443985	0.00674534	0.0102516
peak1902	gene2148	0.0052026	-0.0023426	0.0043098
peak1903	gene2147	0.00320061	-0.00607497	0.00677514
peak1904	gene2148	8.31811e-05	0.00468135	0.00769453
peak1905	gene2148	-0.00398231	-0.00381288	0.0133741
peak1906	gene2149	0.0119721	-0.0130502	-0.0188713
peak1907	gene2150	0.000506062	0.00462078	0.00767958
peak1908	gene2151	0.0037546	-0.00468931	0.00339206
peak1909	gene2153	0.00858282	-0.00278719	-0.0201773
peak1910	gene2154	-0.021323	0.00731365	-0.0234734
peak1911	gene2155	0.00476143	-0.0100871	-0.00990816
peak1912	gene2155	0.0040338	-0.00122982	0.0109964
peak1913	gene2155	-0.000997859	0.00579519	-0.00931204
peak1914	gene2160	0.00121535	-0.0036251	0.00172563
peak1915	gene2163	0.00686469	-0.0027512	-0.00266929
peak1916	gene2167	0.00612698	-0.0089162	-0.0199784
peak1917	gene2170	-0.00487338	-0.00357232	0.00531989
peak1918	gene2170	0.000282852	0.00558172	0.00867831
peak1919	gene2170	-0.00356241	-0.00158859	0.00855984
peak1920	gene2170	-0.00414409	-0.00597593	0.0016152
peak1921	gene2170	-0.0124199	-0.00196652	0.00337812
peak1922	gene2170	-0.0194605	0.00392265	0.00341919
peak1923	gene2173	-0.00489718	-0.000391196	0.0136374
peak1924	gene2174	-0.000228136	0.00343112	0.00371002
peak1925	gene2174	0.00524956	0.00122113	0.00160049
peak1926	gene2175	0.00664995	-0.00238068	0.00202325
peak1927	gene2186	0.0112201	-0.0113837	-6.84386e-05
peak1928	gene2187	-0.00537445	-0.000481806	0.0169655
peak1929	gene2187	0.000509918	-0.00213712	0.00662538
peak1930	gene2186	0.0122332	-0.0107844	-0.0140558
peak1931	gene2186	0.00836347	-0.0107234	-0.0144334
peak1932	gene2189	-0.000631327	-0.00579994	-0.00682501
peak1933	gene2189	-0.00942486	-0.00434432	0.00535218
peak1934	gene2189	0.00146257	0.000849876	0.00897258
peak1935	gene2189	-0.00434524	-0.00279361	0.00761597
peak1936	gene2189	-0.00381433	0.00502548	0.00218816
peak1937	gene2189	-0.000321123	-0.00205049	0.00242515
peak1938	gene2189	-0.00247019	0.0140436	0.00262462
peak1939	gene2189	-0.00339387	0.00288538	0.00815002
peak1940	gene2192	-0.00593489	-0.000143713	-0.0056994
peak1941	gene2193	0.002233	0.00265286	0.0108112
peak1942	gene2197	0.00359287	-0.000143629	0.00926112
peak1943	gene2199	-0.00607384	0.00852538	-0.00567243
peak1944	gene2199	-0.00612928	-0.00417054	0.00551468
peak1945	gene2199	-0.00409969	0.00677626	-0.00444231
peak1946	gene2207	-0.00588384	0.00730121	0.00215554
peak1947	gene2209	0.00888523	-0.0168062	-0.0230441
peak1948	gene2210	0.0035929	-0.00231188	0.002587
peak1949	gene2210	-0.00650576	0.00166915	0.00053208
peak1950	gene2211	-0.000156299	-0.00203632	0.00518028
peak1951	gene2211	0.00493399	0.00401203	-0.00363823
peak1952	gene2211	0.00552689	0.00504128	0.000371504
peak1953	gene2211	0.00252585	7.79479e-05	0.0135639
peak1954	gene2211	-0.00755501	0.00287531	0.00592494
peak1955	gene2211	0.00193985	0.010512	0.0059715
peak1956	gene2211	-0.00488578	0.00379739	-0.0146313
peak1957	gene2213	-0.00673537	0.000821491	0.00877474
peak1958	gene2215	0.00242367	0.000337452	-0.000644614
peak1959	gene2215	0.000908905	0.0104867	-0.00632319
peak1960	gene2215	-0.0102701	-0.00465631	-0.0205275
peak1961	gene2216	0.00681456	-0.0109929	-0.00996809
peak1962	gene2220	0.000980727	-0.000199207	0.00560728
peak1963	gene2221	0.00185308	-0.00460476	0.0103652
peak1964	gene2221	0.00140732	-0.00557913	0.0050219
peak1965	gene2221	-0.0110011	0.0154667	-0.00744627
peak1966	gene2225	0.00358664	-0.00291629	-0.00896044
peak1967	gene2225	0.00488139	0.00709135	-0.00127836
peak1968	gene2225	-0.000874263	-0.00133107	0.00571318
peak1969	gene2225	-3.1732e-05	0.00214189	0.0012177
peak1970	gene2226	-0.00451028	0.00253833	-0.00823758
peak1971	gene2227	0.0141435	-0.0141395	-0.0151363
peak1972	gene2228	0.00373692	0.0069442	-0.0134122
peak1973	gene2228	-0.0077719	0.00404348	-0.0191899
peak1974	gene2228	0.00490625	-0.00440185	-0.0123723
peak1975	gene2229	-0.00985003	0.00488961	-0.00147304
peak1976	gene2229	-0.00659176	0.00627766	-0.00292202
peak1977	gene2229	-0.00779157	0.00653671	-0.00704013
peak1978	gene2229	-0.0104874	0.0132104	-0.000916917
peak1979	gene2229	0.00195669	0.00772826	-0.000702179
peak1980	gene2231	-0.0122184	0.0138676	-0.0177115
peak1981	gene2232	-0.00281489	0.00620024	-0.00112662
peak1982	gene2231	-0.0144268	0.014403	-0.0194752
peak1983	gene2231	-0.000430411	0.00564868	-0.00322897
peak1984	gene2233	0.00877761	0.0175126	-0.0124857
peak1985	gene2233	-0.00371664	0.00408518	-0.006222
peak1986	gene2232	-0.00238299	0.00113528	0.00196919
peak1987	gene2231	-0.00894041	0.00220299	0.00190462
peak1988	gene2231	-0.00446521	0.00623307	-0.00402055
peak1989	gene2234	-0.00527257	0.00894204	-0.00216481
peak1990	gene2236	0.00741887	-0.0109636	-0.00972737
peak1991	gene2243	-0.00888801	0.0113664	-0.0188897
peak1992	gene2244	0.00266903	0.00758851	-0.00805419
peak1993	gene2244	0.0112621	-0.0100582	-0.0238285
peak1994	gene2246	0.00119067	-0.000173743	0.00406158
peak1995	gene2246	-0.0065964	-0.000445266	-0.00600752
peak1996	gene2246	0.00890144	-0.00471037	0.00761871
peak1997	gene2246	0.00310674	0.0086775	-0.00399792
peak1998	gene2246	-0.00237416	0.00901266	-0.00584788
peak1999	gene2246	-0.00705681	0.0037074	-0.00893758
[truncated: 9,613 more rows]
