# Supplementary material for: Individual differences in honey bee behavior enabled by plasticity in brain gene regulatory networks
Source: bioRxiv preprint, doi:10.1101/2020.09.09.289272, version 2 (2020-12-12)
Supplement: Supplemental File 7 [file 289272_file09.xlsx]

## Sheet: Sheet1
	F>L DAPs								L>F DAPs								F vs. L DAPs								G vs. L DAPs								F>L DEGs								L>F DEGs								F vs. L DEGs
Motif	N	nPeaks	MotifN	nTFpeaks	P_val	qvalues		Motif	N	nPeaks	MotifN	nMotifPeaks	P_val	qvalues		Motif	N	nPeaks	MotifN	nMotifPeaks	P_val	qvalues		Motif	N	nPeaks	MotifN	nMotifPeaks	P_val	qvalues		Motif	nUniverse	nDEG	nGenesTF	nCommon	P_Val	Q_Val		Motif	nUniverse	nDEG	nGenesTF	nCommon	P_Val	Q_Val		Motif	nUniverse
tai_Met_SOLEXA_5	9669	879	200	60	0	0		brk_FlyReg	5225	475	199	90	0	0		brk_FlyReg	14894	1354	200	70	0	0		CG12155_SOLEXA	5511	11	200	3	0.00626156	0.471973		Side_SOLEXA_5	9759	2294	500	163	1.25962e-06	9.44345e-05		Achi_SOLEXA	9759	2217	500	130	0.0421031	0.889481		Antp_SOLEXA	9759
Hey_SOLEXA_5	9669	879	199	56	4.44089e-15	4.95159e-13		Mad_FlyReg	5225	475	200	59	0	0		pho_SOLEXA_5	14894	1354	200	53	4.7e-13	4.75e-11		CG5180_SOLEXA	5511	11	200	3	0.00626156	0.471973		tai_Met_SOLEXA_5	9759	2294	503	151	0.000336712	0.0126218		Atf_2_SOLEXA	9759	2217	503	129	0.061384	0.889481		Ara_SOLEXA	9759
Tkr_SOLEXA	9669	879	199	53	2.86104e-13	2.12671e-11		pho_SOLEXA_5	5225	475	200	70	0	0		Hey_SOLEXA_5	14894	1354	200	52	1.75e-12	1.18e-10		sage_da_SOLEXA_5	5511	11	201	3	0.00634941	0.471973		h_SOLEXA_5	9759	2294	501	145	0.00228774	0.0571714		CG1621_SOLEXA	9759	2217	500	130	0.0421031	0.889481		Atf_2_SOLEXA	9759
Met_SOLEXA_5	9669	879	200	51	4.94882e-12	2.75897e-10		tai_Met_SOLEXA_5	5225	475	200	56	2.44e-15	1.36e-13		Tkr_SOLEXA	14894	1354	200	51	6.32e-12	2.56e-10		ac_da_SOLEXA_5	5511	11	202	2	0.0591465	0.694193		Max_Mnt_SOLEXA_5	9759	2294	500	143	0.00396755	0.0743627		CG5180_SOLEXA	9759	2217	500	132	0.0262282	0.889481		CG11723_SOLEXA	9759
gce_SOLEXA_5	9669	879	200	50	1.7719e-11	6.58558e-10		Tkr_SOLEXA	5225	475	199	49	2.95e-11	1.14e-09		gce_SOLEXA_5	14894	1354	200	51	6.32e-12	2.56e-10		Adf1_SOLEXA	5511	11	199	2	0.0575861	0.694193		lola_PF_SOLEXA_2.5	9759	2294	501	139	0.0135098	0.168806		CG8281_SOLEXA	9759	2217	500	135	0.0120049	0.889481		CG12029_SOLEXA_5	9759
Cf2_PB_SOLEXA_5	9669	879	200	50	1.7719e-11	6.58558e-10		Atf_2_SOLEXA	5225	475	200	49	3.58e-11	1.14e-09		Met_SOLEXA_5	14894	1354	200	50	2.23e-11	7.52e-10		Cf2_PB_SOLEXA_5	5511	11	200	2	0.0581045	0.694193		sr_SOLEXA_5	9759	2294	501	139	0.0135098	0.168806		Cf2_PB_SOLEXA_5	9759	2217	505	135	0.0167003	0.889481		CG1621_SOLEXA	9759
Max_Mnt_SOLEXA_5	9669	879	200	48	2.09254e-10	6.66625e-09		vri_SOLEXA	5225	475	200	49	3.58e-11	1.14e-09		tai_Met_SOLEXA_5	14894	1354	200	49	7.66e-11	2.21e-09		CG10904_SOLEXA	5511	11	201	2	0.0586246	0.694193		Antp_SOLEXA	9759	2294	500	135	0.0345037	0.195816		D19A_F10_12_SANGER_5	9759	2217	503	131	0.039556	0.889481		CG5180_SOLEXA	9759
cwo_SOLEXA_5	9669	879	198	47	4.81652e-10	1.34261e-08		opa_SOLEXA_5	5225	475	199	48	1.04e-10	2.9e-09		tai_SOLEXA_5	14894	1354	200	48	2.56e-10	6.47e-09		Fer1_da_SOLEXA_5	5511	11	199	2	0.0575861	0.694193		BH1_SOLEXA	9759	2294	500	135	0.0345037	0.195816		Exd_SOLEXA	9759	2217	502	129	0.0583381	0.889481		CG7368_SOLEXA_2.5	9759
Side_SOLEXA_5	9669	879	198	45	4.93347e-09	1.2224e-07		Trl_FlyReg	5225	475	201	45	5.4e-09	1.34e-07		Cf2_PB_SOLEXA_5	14894	1354	200	46	2.63e-09	5.33e-08		Fer1_SOLEXA_5	5511	11	200	2	0.0581045	0.694193		Trl_FlyReg	9759	2294	500	135	0.0345037	0.195816		Fer1_SOLEXA_5	9759	2217	503	131	0.039556	0.889481		CG8281_SOLEXA	9759
BtbVII_SOLEXA	9669	879	200	43	6.11647e-08	1.13664e-06		gce_SOLEXA_5	5225	475	199	44	1.21e-08	2.7e-07		Fer1_SOLEXA_5	14894	1354	200	46	2.63e-09	5.33e-08		Fer2_da_SOLEXA_5	5511	11	200	2	0.0581045	0.694193		cwo_SOLEXA_5	9759	2294	501	135	0.0365666	0.195816		Hth_SOLEXA	9759	2217	500	128	0.065076	0.889481		E5_SOLEXA	9759
h_SOLEXA_5	9669	879	200	43	6.11647e-08	1.13664e-06		Med_FlyReg	5225	475	200	44	1.42e-08	2.89e-07		Max_Mnt_SOLEXA_5	14894	1354	200	45	8.1e-09	1.37e-07		Hand_da_SOLEXA_5	5511	11	199	2	0.0575861	0.694193		gcm_SELEX	9759	2294	500	136	0.0272102	0.195816		Six4_SOLEXA_2	9759	2217	500	127	0.079774	0.889481		Eip74EF_SOLEXA	9759
Usf_SOLEXA_5	9669	879	200	43	6.11647e-08	1.13664e-06		Fer1_SOLEXA_5	5225	475	199	43	3.69e-08	6.33e-07		Mad_FlyReg	14894	1354	200	45	8.1e-09	1.37e-07		klu_SOLEXA_5	5511	11	200	2	0.0581045	0.694193		klu_SOLEXA_5	9759	2294	501	137	0.0226459	0.195816		Tkr_SOLEXA	9759	2217	502	129	0.0583381	0.889481		Fer1_SOLEXA_5	9759
D19B_SOLEXA_5	9669	879	199	42	1.50629e-07	2.58386e-06		pros_SELEX	5225	475	199	43	3.69e-08	6.33e-07		Trl_FlyReg	14894	1354	200	44	2.42e-08	3.77e-07		l_3_neo38_SOLEXA_2.5	5511	11	198	2	0.0570694	0.694193		l_3_neo38_SOLEXA_2.5	9759	2294	503	136	0.032569	0.195816		jigr1_SOLEXA	9759	2217	500	127	0.079774	0.889481		HLH106_SOLEXA_5_4	9759
tai_SOLEXA_5	9669	879	199	41	4.19377e-07	6.68008e-06		jigr1_SOLEXA	5225	475	199	40	8.62e-07	1.37e-05		Side_SOLEXA_5	14894	1354	202	44	3.31e-08	4.78e-07		lola_PK_SOLEXA	5511	11	200	2	0.0581045	0.694193		tai_SOLEXA_5	9759	2294	501	136	0.0289109	0.195816		jim_F1_9_SOLEXA_2.5	9759	2217	501	133	0.0217182	0.889481		Her_SOLEXA_5	9759
Fer1_SOLEXA_5	9669	879	199	40	1.13237e-06	1.57824e-05		sug_SOLEXA_5	5225	475	200	40	9.88e-07	1.47e-05		lola_PK_SOLEXA	14894	1354	200	43	7.03e-08	9.48e-07		lola_PQ_SOLEXA	5511	11	198	2	0.0570694	0.694193		Ara_SOLEXA	9759	2294	500	132	0.066538	0.202075		ken_SOLEXA_5	9759	2217	500	131	0.0333891	0.889481		Hth_SOLEXA	9759
ey_SOLEXA	9669	879	199	40	1.13237e-06	1.57824e-05		cwo_SOLEXA_5	5225	475	199	39	2.31e-06	3.22e-05		Hand_da_SOLEXA_5	14894	1354	200	42	1.98e-07	2.51e-06		Oli_da_SOLEXA_5_1	5511	11	201	2	0.0586246	0.694193		Bap_SOLEXA	9759	2294	502	131	0.0894655	0.202075		lola_PU_SOLEXA_5	9759	2217	500	127	0.079774	0.889481		Side_SOLEXA_5	9759
CG8319_SOLEXA_2.5	9669	879	200	39	3.36816e-06	4.41823e-05		gt_SOLEXA	5225	475	200	39	2.63e-06	3.45e-05		BtbVII_SOLEXA	14894	1354	200	41	5.43e-07	5.78e-06		sr_SOLEXA_5	5511	11	200	2	0.0581045	0.694193		Bteb2_SOLEXA_2.5	9759	2294	502	131	0.0894655	0.202075		nub_SOLEXA	9759	2217	503	136	0.0111745	0.889481		Tkr_SOLEXA	9759
Poxm_SOLEXA	9669	879	200	38	8.4895e-06	9.96399e-05		Met_SOLEXA_5	5225	475	200	37	1.7e-05	0.000180017		h_SOLEXA_5	14894	1354	200	41	5.43e-07	5.78e-06		tap_da_SOLEXA_5	5511	11	200	2	0.0581045	0.694193		CG12029_SOLEXA_5	9759	2294	502	130	0.107815	0.202075		ovo_SOLEXA_5	9759	2217	500	129	0.0525912	0.889481		Trl_FlyReg	9759
Fer2_da_SOLEXA_5	9669	879	200	38	8.4895e-06	9.96399e-05		Fer2_da_SOLEXA_5	5225	475	200	37	1.7e-05	0.000180017		CG5669_SOLEXA_5	14894	1354	200	41	5.43e-07	5.78e-06		Trl_FlyReg	5511	11	199	2	0.0575861	0.694193		CG15601_SOLEXA	9759	2294	506	131	0.107489	0.202075		pho_SOLEXA_5	9759	2217	500	128	0.065076	0.889481		br_PC_SOLEXA_10	9759
da_SOLEXA_5	9669	879	200	37	2.07238e-05	0.00023107		trem_SELEX	5225	475	200	37	1.7e-05	0.000180017		da_SOLEXA_5	14894	1354	200	40	1.44e-06	1.46e-05		AbdB_SOLEXA	5511	11	199	1	0.332976	0.931879		CG7368_SOLEXA_2.5	9759	2294	504	133	0.066437	0.202075		vri_SOLEXA	9759	2217	501	128	0.0683938	0.889481		ci_SOLEXA_5	9759
Parx_da_SOLEXA_5	9669	879	198	36	3.92864e-05	0.000417184		lola_PK_SOLEXA	5225	475	199	37	1.51e-05	0.000180017		trem_SELEX	14894	1354	200	39	3.72e-06	3.42e-05		Aef1_SOLEXA_5	5511	11	199	1	0.332976	0.931879		CrebA_SOLEXA	9759	2294	501	130	0.103063	0.202075		HLH106_SOLEXA_5_4	9759	2217	501	126	0.101337	0.912647		eyg_SOLEXA_t50	9759
pad_SOLEXA_5	9669	879	200	36	4.89704e-05	0.000496382		Usf_SOLEXA_5	5225	475	201	37	1.9e-05	0.000193041		Fer1_da_SOLEXA_5	14894	1354	200	39	3.72e-06	3.42e-05		BH1_SOLEXA	5511	11	201	1	0.335736	0.931879		E5_SOLEXA	9759	2294	501	132	0.0699888	0.202075		Her_SOLEXA_5	9759	2217	501	125	0.121656	0.912647		gce_SOLEXA_5	9759
brk_FlyReg	9669	879	199	35	0.000100935	0.000833648		Max_Mnt_SOLEXA_5	5225	475	200	36	4.09e-05	0.000350795		Poxm_SOLEXA	14894	1354	200	38	9.28e-06	7.22e-05		bowl_SOLEXA_5	5511	11	199	1	0.332976	0.931879		Hey_SOLEXA_5	9759	2294	500	133	0.053953	0.202075		Lbe_SOLEXA	9759	2217	502	126	0.105928	0.912647		gcm_SELEX	9759
trem_SELEX	9669	879	198	35	9.09013e-05	0.000833648		HLH106_SOLEXA_5_4	5225	475	200	36	4.09e-05	0.000350795		Parx_da_SOLEXA_5	14894	1354	200	38	9.28e-06	7.22e-05		br_PL_SOLEXA_5	5511	11	199	1	0.332976	0.931879		Hr78_SOLEXA	9759	2294	501	132	0.0699888	0.202075		NFAT_SOLEXA	9759	2217	504	126	0.115536	0.912647		h_SOLEXA_5	9759
Fer1_da_SOLEXA_5	9669	879	199	35	0.000100935	0.000833648		toy_SOLEXA	5225	475	200	36	4.09e-05	0.000350795		pad_SOLEXA_5	14894	1354	200	38	9.28e-06	7.22e-05		BtbVII_SOLEXA	5511	11	201	1	0.335736	0.931879		Ind_Cell	9759	2294	501	132	0.0699888	0.202075		brk_FlyReg	9759	2217	503	127	0.0917678	0.912647		her_SOLEXA_10	9759
Exd_SOLEXA	9669	879	199	35	0.000100935	0.000833648		gsb_n_SOLEXA	5225	475	199	36	3.66e-05	0.000350795		sug_SOLEXA_5	14894	1354	200	38	9.28e-06	7.22e-05		Bteb2_SOLEXA_2.5	5511	11	198	1	0.331592	0.931879		Met_SOLEXA_5	9759	2294	503	133	0.0631311	0.202075		foxo_SOLEXA	9759	2217	500	125	0.116586	0.912647		jim_F1_9_SOLEXA_2.5	9759
lola_PP_SOLEXA_2.5	9669	879	199	35	0.000100935	0.000833648		Exd_SOLEXA	5225	475	200	35	9.54e-05	0.000708825		Atf_2_SOLEXA	14894	1354	201	38	1.05e-05	7.83e-05		byn_FlyReg	5511	11	199	1	0.332976	0.931879		Oli_da_SOLEXA_5_1	9759	2294	505	131	0.102766	0.202075		lola_PP_SOLEXA_2.5	9759	2217	500	125	0.116586	0.912647		ken_SOLEXA_5	9759
tgo_sima_SOLEXA_5	9669	879	200	35	0.000111958	0.000891664		CG3065_F1_5_SOLEXA_2.5	5225	475	200	35	9.54e-05	0.000708825		ey_SOLEXA	14894	1354	200	37	2.25e-05	0.00015657		CG11071_SOLEXA_5	5511	11	199	1	0.332976	0.931879		Optix_SOLEXA	9759	2294	501	130	0.103063	0.202075		sd_FlyReg	9759	2217	502	126	0.105928	0.912647		klu_SOLEXA_5	9759
lola_PK_SOLEXA	9669	879	199	34	0.000224468	0.00172608		hb_SOLEXA_5	5225	475	199	35	8.58e-05	0.000708825		byn_FlyReg	14894	1354	200	37	2.25e-05	0.00015657		CG12236_PB_SOLEXA_2.5	5511	11	200	1	0.334357	0.931879		ab_SOLEXA_5	9759	2294	500	130	0.0984587	0.202075		ttk_PA_SOLEXA_5	9759	2217	500	126	0.0968858	0.912647		l_3_neo38_SOLEXA_2.5	9759
CG5669_SOLEXA_5	9669	879	198	33	0.000439647	0.00326804		Ets21C_SOLEXA	5225	475	200	35	9.54e-05	0.000708825		cwo_SOLEXA_5	14894	1354	200	36	5.26e-05	0.00030403		CG13897_SOLEXA	5511	11	200	1	0.334357	0.931879		ci_SOLEXA_5	9759	2294	501	131	0.0853175	0.202075		vfl_SOLEXA_5	9759	2217	502	125	0.12687	0.912647		lola_PD_SOLEXA_5	9759
vfl_SOLEXA_5	9669	879	199	33	0.000482424	0.00347034		ci_SOLEXA_5	5225	475	201	35	0.000105834	0.000761325		Usf_SOLEXA_5	14894	1354	200	36	5.26e-05	0.00030403		CG15601_SOLEXA	5511	11	203	1	0.338485	0.931879		crp_SOLEXA_5	9759	2294	506	131	0.107489	0.202075		vvl_SOLEXA	9759	2217	502	125	0.12687	0.912647		nub_SOLEXA	9759
Trl_FlyReg	9669	879	200	33	0.000528843	0.0035737		CG5669_SOLEXA_5	5225	475	198	34	0.000175884	0.00118855		Fer2_da_SOLEXA_5	14894	1354	200	36	5.26e-05	0.00030403		CG3838_SOLEXA	5511	11	198	1	0.331592	0.931879		da_SOLEXA_5	9759	2294	500	130	0.0984587	0.202075		CG11071_SOLEXA_5	9759	2217	501	124	0.144721	0.922082		ovo_SOLEXA_5	9759
CG12768_SOLEXA	9669	879	200	33	0.000528843	0.0035737		bab1_SOLEXA	5225	475	198	34	0.000175884	0.00118855		pros_SELEX	14894	1354	200	36	5.26e-05	0.00030403		CG3919_SOLEXA	5511	11	199	1	0.332976	0.931879		dl_NBT	9759	2294	501	132	0.0699888	0.202075		CG5953_SOLEXA	9759	2217	501	124	0.144721	0.922082		sd_FlyReg	9759
Hand_da_SOLEXA_5	9669	879	199	32	0.00100142	0.0063805		tai_SOLEXA_5	5225	475	199	34	0.000194441	0.00120445		lola_PG_SOLEXA_	14894	1354	200	36	5.26e-05	0.00030403		CG4854_SOLEXA_5	5511	11	199	1	0.332976	0.931879		gce_SOLEXA_5	9759	2294	505	132	0.0851192	0.202075		Med_FlyReg	9759	2217	500	124	0.139012	0.922082		tai_Met_SOLEXA_5	9759
pros_SELEX	9669	879	199	32	0.00100142	0.0063805		Achi_SOLEXA	5225	475	199	34	0.000194441	0.00120445		Bteb2_SOLEXA_2.5	14894	1354	200	36	5.26e-05	0.00030403		CG5669_SOLEXA_5	5511	11	199	1	0.332976	0.931879		gl_SOLEXA_5	9759	2294	501	130	0.103063	0.202075		pfk_SOLEXA	9759	2217	500	124	0.139012	0.922082		ttk_PA_SOLEXA_5	9759
HLH106_SOLEXA_5_4	9669	879	200	32	0.00109144	0.00676085		Bteb2_SOLEXA_2.5	5225	475	199	34	0.000194441	0.00120445		D19B_SOLEXA_5	14894	1354	200	35	0.00011937	0.00060348		CG7368_SOLEXA_2.5	5511	11	199	1	0.332976	0.931879		kay_Jra_SANGER	9759	2294	502	131	0.0894655	0.202075		C15_SOLEXA	9759	2217	500	123	0.164256	0.939205		usp_SOLEXA	9759
HLH4C_da_SOLEXA_5	9669	879	201	32	0.00118844	0.00716274		CrebA_SOLEXA	5225	475	200	34	0.000214735	0.00126015		CG8319_SOLEXA_2.5	14894	1354	200	35	0.00011937	0.00060348		CG8765_SOLEXA	5511	11	201	1	0.335736	0.931879		nau_SOLEXA_5	9759	2294	502	130	0.107815	0.202075		CG11504_SOLEXA	9759	2217	504	124	0.162729	0.939205		Max_Mnt_SOLEXA_5	9759
sr_SOLEXA_5	9669	879	198	31	0.00185007	0.010857		Xrp1_CG6272_SOLEXA	5225	475	200	34	0.000214735	0.00126015		tgo_sima_SOLEXA_5	14894	1354	200	35	0.00011937	0.00060348		CG9437_SOLEXA	5511	11	199	1	0.332976	0.931879		sens_SOLEXA_5	9759	2294	501	130	0.103063	0.202075		Crc_CG6272_SOLEXA	9759	2217	500	123	0.164256	0.939205		slbo_SOLEXA	9759
D19A_F10_12_SANGER_5	9669	879	200	31	0.00217455	0.0124339		byn_FlyReg	5225	475	198	33	0.000386938	0.00221249		nau_SOLEXA_5	14894	1354	200	35	0.00011937	0.00060348		cic_SOLEXA	5511	11	201	1	0.335736	0.931879		tgo_sima_SOLEXA_5	9759	2294	503	135	0.0409846	0.202075		cnc_maf_s_SELEX	9759	2217	500	123	0.164256	0.939205		vfl_SOLEXA_5	9759
byn_FlyReg	9669	879	199	30	0.00387927	0.0201181		Cf2_PB_SOLEXA_5	5225	475	199	33	0.000425206	0.0023127		bab1_SOLEXA	14894	1354	200	35	0.00011937	0.00060348		CrebA_SOLEXA	5511	11	200	1	0.334357	0.931879		tgo_ss_SOLEXA_5	9759	2294	500	132	0.066538	0.202075		Mad_FlyReg	9759	2217	501	123	0.170612	0.951161		BH1_SOLEXA	9759
Ara_SOLEXA	9669	879	199	30	0.00387927	0.0201181		her_SOLEXA_10	5225	475	199	33	0.000425206	0.0023127		HLH106_SOLEXA_5_4	14894	1354	200	34	0.00026197	0.00120401		crp_SOLEXA_5	5511	11	199	1	0.332976	0.931879		Dfd_SOLEXA	9759	2294	500	129	0.118152	0.205998		br_PC_SOLEXA_10	9759	2217	502	123	0.177114	0.963326		Exd_SOLEXA	9759
Achi_SOLEXA	9669	879	199	30	0.00387927	0.0201181		Poxm_SOLEXA	5225	475	200	33	0.000466796	0.00236581		gt_SOLEXA	14894	1354	200	34	0.00026197	0.00120401		Ct_SOLEXA	5511	11	200	1	0.334357	0.931879		Eip74EF_SOLEXA	9759	2294	500	129	0.118152	0.205998		CG10267_F1_3_SOLEXA_5	9759	2217	504	123	0.19055	0.974854		jigr1_SOLEXA	9759
CG31782_SOLEXA_5	9669	879	199	30	0.00387927	0.0201181		Oli_da_SOLEXA_5_1	5225	475	200	33	0.000466796	0.00236581		hb_SOLEXA_5	14894	1354	200	34	0.00026197	0.00120401		D19B_SOLEXA_5	5511	11	197	1	0.330205	0.931879		sage_da_SOLEXA_5	9759	2294	500	129	0.118152	0.205998		Eip74EF_SOLEXA	9759	2217	500	122	0.192348	0.974854		tgo_ss_SOLEXA_5	9759
crp_SOLEXA_5	9669	879	200	30	0.0041801	0.0207147		GATAd_SOLEXA	5225	475	200	33	0.000466796	0.00236581		jigr1_SOLEXA	14894	1354	200	34	0.00026197	0.00120401		dimm_da_SOLEXA_5	5511	11	198	1	0.331592	0.931879		trem_SELEX	9759	2294	501	129	0.123384	0.210232		lola_PD_SOLEXA_5	9759	2217	500	122	0.192348	0.974854		Doc2_SOLEXA	9759
CG12155_SOLEXA	9669	879	200	30	0.0041801	0.0207147		Side_SOLEXA_5	5225	475	201	33	0.000511953	0.00253701		sr_SOLEXA_5	14894	1354	201	34	0.0002884	0.001296		eg_SOLEXA	5511	11	199	1	0.332976	0.931879		Tkr_SOLEXA	9759	2294	502	129	0.128768	0.21453		AbdB_SOLEXA	9759	2217	501	118	0.340587	0.999662		Ets21C_SOLEXA	9759
lola_PG_SOLEXA_	9669	879	199	29	0.0072309	0.0316175		Parx_da_SOLEXA_5	5225	475	200	32	0.000979016	0.0047461		CrebA_SOLEXA	14894	1354	200	33	0.00055591	0.00216184		ey_SOLEXA	5511	11	200	1	0.334357	0.931879		CG11723_SOLEXA	9759	2294	500	128	0.140518	0.214995		Adf1_SOLEXA	9759	2217	501	112	0.596756	0.999662		Optix_SOLEXA	9759
CrebA_SOLEXA	9669	879	199	29	0.0072309	0.0316175		h_SOLEXA_5	5225	475	201	32	0.00106745	0.00495922		klu_SOLEXA_5	14894	1354	200	33	0.00055591	0.00216184		fkh_NAR	5511	11	200	1	0.334357	0.931879		CG15696_SOLEXA	9759	2294	500	128	0.140518	0.214995		Aef1_SOLEXA_5	9759	2217	500	108	0.746016	0.999662		Usf_SOLEXA_5	9759
HLH54F_da_SOLEXA_5	9669	879	199	29	0.0072309	0.0316175		jim_F1_9_SOLEXA_2.5	5225	475	201	32	0.00106745	0.00495922		toy_SOLEXA	14894	1354	200	33	0.00055591	0.00216184		ftz_f1_SOLEXA_2	5511	11	200	1	0.334357	0.931879		Doc2_SOLEXA	9759	2294	500	128	0.140518	0.214995		Antp_SOLEXA	9759	2217	500	111	0.629417	0.999662		lola_PO_SOLEXA	9759
CG10904_SOLEXA	9669	879	199	29	0.0072309	0.0316175		BtbVII_SOLEXA	5225	475	200	31	0.00197992	0.00802767		Oli_da_SOLEXA_5_1	14894	1354	200	33	0.00055591	0.00216184		grh_FlyReg	5511	11	197	1	0.330205	0.931879		Hr39_SOLEXA	9759	2294	500	128	0.140518	0.214995		Ara_SOLEXA	9759	2217	500	113	0.543915	0.999662		lola_PU_SOLEXA_5	9759
ken_SOLEXA_5	9669	879	199	29	0.0072309	0.0316175		ey_SOLEXA	5225	475	199	31	0.00182478	0.00802767		Deaf1_FlyReg	14894	1354	200	33	0.00055591	0.00216184		her_SOLEXA_10	5511	11	202	1	0.337112	0.931879		eyg_SOLEXA_t50	9759	2294	501	128	0.146397	0.215207		Atf6_SOLEXA	9759	2217	500	106	0.811732	0.999662		salr_F3_5_SOLEXA_2.5	9759
nub_SOLEXA	9669	879	199	29	0.0072309	0.0316175		pad_SOLEXA_5	5225	475	200	31	0.00197992	0.00802767		opa_SOLEXA_5	14894	1354	200	33	0.00055591	0.00216184		Her_SOLEXA_5	5511	11	200	1	0.334357	0.931879		pros_SELEX	9759	2294	501	128	0.146397	0.215207		Awh_SOLEXA	9759	2217	501	117	0.381294	0.999662		sens_SOLEXA_5	9759
Mad_FlyReg	9669	879	200	29	0.00774829	0.0332282		Fer1_da_SOLEXA_5	5225	475	200	31	0.00197992	0.00802767		gsb_n_SOLEXA	14894	1354	200	33	0.00055591	0.00216184		HLH4C_da_SOLEXA_5	5511	11	199	1	0.332976	0.931879		her_SOLEXA_10	9759	2294	502	128	0.152431	0.219767		BH1_SOLEXA	9759	2217	500	108	0.746016	0.999662		vri_SOLEXA	9759
klu_SOLEXA_5	9669	879	198	28	0.0121783	0.0512409		Hand_da_SOLEXA_5	5225	475	200	31	0.00197992	0.00802767		ci_SOLEXA_5	14894	1354	201	33	0.00060846	0.00232154		HLH4C_SOLEXA_5	5511	11	197	1	0.330205	0.931879		pad_SOLEXA_5	9759	2294	500	127	0.16564	0.221753		Bap_SOLEXA	9759	2217	502	109	0.725873	0.999662		Achi_SOLEXA	9759
Atf_2_SOLEXA	9669	879	199	28	0.0129884	0.0523161		CG31782_SOLEXA_5	5225	475	199	31	0.00182478	0.00802767		CG12768_SOLEXA	14894	1354	200	32	0.00113996	0.00384205		HLH54F_da_SOLEXA_5	5511	11	200	1	0.334357	0.931879		peb_F1_3_SOLEXA_2.5	9759	2294	503	128	0.158618	0.221753		Blimp_1_SOLEXA_5	9759	2217	500	114	0.50025	0.999662		Awh_SOLEXA	9759
nau_SOLEXA_5	9669	879	200	28	0.0138415	0.0523161		lola_PD_SOLEXA_5	5225	475	200	31	0.00197992	0.00802767		Ara_SOLEXA	14894	1354	200	32	0.00113996	0.00384205		Hr46_SOLEXA	5511	11	200	1	0.334357	0.931879		shn_F1_2_SOLEXA_2.5	9759	2294	500	127	0.16564	0.221753		BtbVII_SOLEXA	9759	2217	501	118	0.340587	0.999662		Bap_SOLEXA	9759
hkb_SOLEXA_5	9669	879	200	28	0.0138415	0.0523161		klu_SOLEXA_5	5225	475	198	30	0.00331284	0.0131922		crp_SOLEXA_5	14894	1354	200	32	0.00113996	0.00384205		Hr51_SOLEXA	5511	11	197	1	0.330205	0.931879		usp_SOLEXA	9759	2294	500	127	0.16564	0.221753		Bteb2_SOLEXA_2.5	9759	2217	502	102	0.916235	0.999662		C15_SOLEXA	9759
CG11071_SOLEXA_5	9669	879	199	28	0.0129884	0.0523161		fru_PI_SOLEXA_5	5225	475	199	30	0.00357699	0.0139942		hkb_SOLEXA_5	14894	1354	200	32	0.00113996	0.00384205		kay_Jra_SANGER	5511	11	200	1	0.334357	0.931879		Hand_da_SOLEXA_5	9759	2294	501	127	0.172175	0.222553		CG10267_SOLEXA_5	9759	2217	503	106	0.830843	0.999662		CG12155_SOLEXA	9759
ttk_PA_SOLEXA_5	9669	879	200	28	0.0138415	0.0523161		lola_PY_SOLEXA_5	5225	475	200	30	0.00385883	0.014342		Hr46_SOLEXA	14894	1354	200	32	0.00113996	0.00384205		ken_SOLEXA_5	5511	11	198	1	0.331592	0.931879		sob_F3_5_SOLEXA_5	9759	2294	501	127	0.172175	0.222553		CG10904_SOLEXA	9759	2217	503	106	0.830843	0.999662		CG31782_SOLEXA_5	9759
Kr_SOLEXA_2.5	9669	879	200	28	0.0138415	0.0523161		Hr46_SOLEXA	5225	475	200	30	0.00385883	0.014342		sage_da_SOLEXA_5	14894	1354	200	32	0.00113996	0.00384205		lola_PA_SOLEXA_5	5511	11	198	1	0.331592	0.931879		Aef1_SOLEXA_5	9759	2294	500	126	0.193547	0.223236		CG11723_SOLEXA	9759	2217	500	118	0.331434	0.999662		CG3838_SOLEXA	9759
toy_SOLEXA	9669	879	197	27	0.0199556	0.0741684		slbo_SOLEXA	5225	475	200	30	0.00385883	0.014342		vri_SOLEXA	14894	1354	200	32	0.00113996	0.00384205		lola_PC_SOLEXA_5	5511	11	196	1	0.328816	0.931879		CG1621_SOLEXA	9759	2294	500	126	0.193547	0.223236		CG12029_SOLEXA_5	9759	2217	502	117	0.390859	0.999662		CG5953_SOLEXA	9759
Oli_da_SOLEXA_5_1	9669	879	199	27	0.0224701	0.0747884		l_3_neo38_SOLEXA_2.5	5225	475	198	29	0.00629018	0.0229952		Achi_SOLEXA	14894	1354	201	32	0.0012406	0.0041127		lola_PD_SOLEXA_5	5511	11	200	1	0.334357	0.931879		CG31782_SOLEXA_5	9759	2294	503	127	0.185698	0.223236		CG12155_SOLEXA	9759	2217	500	120	0.256874	0.999662		CG8319_SOLEXA_2.5	9759
CG3065_F1_5_SOLEXA_2.5	9669	879	199	27	0.0224701	0.0747884		CG7368_SOLEXA_2.5	5225	475	199	29	0.00675302	0.0242891		HLH4C_da_SOLEXA_5	14894	1354	200	31	0.00225773	0.00713372		lola_PG_SOLEXA_	5511	11	201	1	0.335736	0.931879		CG4404_SOLEXA	9759	2294	500	126	0.193547	0.223236		CG12236_PA_SOLEXA_5	9759	2217	503	122	0.213758	0.999662		Cf2_PA_SOLEXA_2.5	9759
CG17181_SOLEXA_5	9669	879	199	27	0.0224701	0.0747884		hkb_SOLEXA_5	5225	475	200	29	0.00724384	0.0256409		Crc_CG6272_SOLEXA	14894	1354	200	31	0.00225773	0.00713372		lola_PU_SOLEXA_5	5511	11	199	1	0.332976	0.931879		Usf_SOLEXA_5	9759	2294	506	128	0.178093	0.223236		CG12236_PB_SOLEXA_2.5	9759	2217	502	111	0.647914	0.999662		D19A_F10_12_SANGER_5	9759
lola_PY_SOLEXA_5	9669	879	199	27	0.0224701	0.0747884		tgo_sima_SOLEXA_5	5225	475	197	28	0.0107592	0.0363531		Med_FlyReg	14894	1354	200	31	0.00225773	0.00713372		lola_PY_SOLEXA_5	5511	11	200	1	0.334357	0.931879		crol_F7_16_SOLEXA_2.5	9759	2294	500	126	0.193547	0.223236		CG12605_SOLEXA_5	9759	2217	501	115	0.466566	0.999662		Deaf1_FlyReg	9759
foxo_SOLEXA	9669	879	199	27	0.0224701	0.0747884		nau_SOLEXA_5	5225	475	197	28	0.0107592	0.0363531		HLH54F_da_SOLEXA_5	14894	1354	201	31	0.00244321	0.00748584		mef2_compiled	5511	11	199	1	0.332976	0.931879		slbo_SOLEXA	9759	2294	500	126	0.193547	0.223236		CG12768_SOLEXA	9759	2217	503	111	0.657016	0.999662		Ets98B_SOLEXA	9759
SuH_compiled	9669	879	199	27	0.0224701	0.0747884		CG11071_SOLEXA_5	5225	475	197	28	0.0107592	0.0363531		CG11071_SOLEXA_5	14894	1354	201	31	0.00244321	0.00748584		nau_SOLEXA_5	5511	11	200	1	0.334357	0.931879		lola_PW_SOLEXA	9759	2294	502	126	0.208055	0.236335		CG13897_SOLEXA	9759	2217	502	116	0.433232	0.999662		Fer2_da_SOLEXA_5	9759
vvl_SOLEXA	9669	879	199	27	0.0224701	0.0747884		tap_da_SOLEXA_5	5225	475	198	28	0.0114953	0.0382605		Exd_SOLEXA	14894	1354	200	30	0.00431618	0.0124688		NFAT_SOLEXA	5511	11	196	1	0.328816	0.931879		Fer1_SOLEXA_5	9759	2294	503	126	0.215527	0.237622		CG14962_SOLEXA_5	9759	2217	500	116	0.413682	0.999662		Hr39_SOLEXA	9759
Hr46_SOLEXA	9669	879	200	27	0.0238167	0.0748046		crp_SOLEXA_5	5225	475	199	28	0.0122718	0.0390945		CG31782_SOLEXA_5	14894	1354	200	30	0.00431618	0.0124688		opa_SOLEXA_5	5511	11	202	1	0.337112	0.931879		salr_F3_5_SOLEXA_2.5	9759	2294	503	126	0.215527	0.237622		CG15601_SOLEXA	9759	2217	506	105	0.873185	0.999662		Lbe_SOLEXA	9759
Tin_SOLEXA	9669	879	200	27	0.0238167	0.0748046		Crc_CG6272_SOLEXA	5225	475	199	28	0.0122718	0.0390945		CG3065_F1_5_SOLEXA_2.5	14894	1354	200	30	0.00431618	0.0124688		Optix_SOLEXA	5511	11	199	1	0.332976	0.931879		ac_da_SOLEXA_5	9759	2294	500	125	0.224201	0.243602		CG15696_SOLEXA	9759	2217	500	102	0.908535	0.999662		Lim3_SOLEXA	9759
CG10267_SOLEXA_5	9669	879	200	27	0.0238167	0.0748046		gsb_SOLEXA	5225	475	199	28	0.0122718	0.0390945		Eip93F_SOLEXA	14894	1354	200	30	0.00431618	0.0124688		Parx_da_SOLEXA_5	5511	11	200	1	0.334357	0.931879		Adf1_SOLEXA	9759	2294	501	125	0.232005	0.24848		CG17181_SOLEXA_5	9759	2217	502	108	0.761477	0.999662		Met_SOLEXA_5	9759
sd_FlyReg	9669	879	200	27	0.0238167	0.0748046		CG9437_SOLEXA	5225	475	200	28	0.0130903	0.0405436		CG12155_SOLEXA	14894	1354	200	29	0.00796021	0.0214628		peb_F5_7_SOLEXA_2.5	5511	11	198	1	0.331592	0.931879		CG3065_F1_5_SOLEXA_2.5	9759	2294	502	125	0.239945	0.253365		CG3065_F1_5_SOLEXA_2.5	9759	2217	502	101	0.932226	0.999662		NFAT_SOLEXA	9759
CG7928_SOLEXA_5	9669	879	199	26	0.0374206	0.114261		Hth_SOLEXA	5225	475	200	28	0.0130903	0.0405436		ttk_PA_SOLEXA_5	14894	1354	200	29	0.00796021	0.0214628		Side_SOLEXA_5	5511	11	200	1	0.334357	0.931879		Awh_SOLEXA	9759	2294	501	123	0.302166	0.255342		CG31670_SOLEXA_5	9759	2217	500	103	0.888681	0.999662		Oli_da_SOLEXA_5_1	9759
jim_F1_9_SOLEXA_2.5	9669	879	199	26	0.0374206	0.114261		CG17181_SOLEXA_5	5225	475	198	27	0.0202085	0.0617329		Tin_SOLEXA	14894	1354	200	29	0.00796021	0.0214628		sug_SOLEXA_5	5511	11	198	1	0.331592	0.931879		CG3838_SOLEXA	9759	2294	502	123	0.31118	0.255342		CG31782_SOLEXA_5	9759	2217	503	112	0.615767	0.999662		Six4_SOLEXA_2	9759
Adf1_SOLEXA	9669	879	200	26	0.0394534	0.114261		Hey_SOLEXA_5	5225	475	199	27	0.0214544	0.0621342		gsb_SOLEXA	14894	1354	200	29	0.00796021	0.0214628		SuH_compiled	5511	11	200	1	0.334357	0.931879		CG7928_SOLEXA_5	9759	2294	502	124	0.274391	0.255342		CG32830_SOLEXA_5	9759	2217	503	101	0.935325	0.999662		Stat92E_SELEX	9759
lola_PJ_SOLEXA	9669	879	200	26	0.0394534	0.114261		CG8319_SOLEXA_2.5	5225	475	199	27	0.0214544	0.0621342		Bap_SOLEXA	14894	1354	200	29	0.00796021	0.0214628		tgo_sima_SOLEXA_5	5511	11	200	1	0.334357	0.931879		CG8319_SOLEXA_2.5	9759	2294	500	122	0.331232	0.255342		CG3838_SOLEXA	9759	2217	502	119	0.310538	0.999662		SuH_compiled	9759
z_FlyReg	9669	879	200	26	0.0394534	0.114261		lola_PG_SOLEXA_	5225	475	199	27	0.0214544	0.0621342		lola_PP_SOLEXA_2.5	14894	1354	200	28	0.0141547	0.0357796		Tin_SOLEXA	5511	11	198	1	0.331592	0.931879		Deaf1_FlyReg	9759	2294	500	123	0.293258	0.255342		CG3919_SOLEXA	9759	2217	504	104	0.885831	0.999662		ac_da_SOLEXA_5	9759
CG13897_SOLEXA	9669	879	200	26	0.0394534	0.114261		Rel_SANGER	5225	475	199	27	0.0214544	0.0621342		CG17181_SOLEXA_5	14894	1354	200	28	0.0141547	0.0357796		toy_SOLEXA	5511	11	200	1	0.334357	0.931879		Ets21C_SOLEXA	9759	2294	501	122	0.340588	0.255342		CG4360_F1_3_SOLEXA_2.5	9759	2217	502	114	0.520074	0.999662		acj6_SOLEXA	9759
sug_SOLEXA_5	9669	879	201	26	0.0415673	0.11884		Bap_SOLEXA	5225	475	200	27	0.0227598	0.0634429		lola_PY_SOLEXA_5	14894	1354	200	28	0.0141547	0.0357796		trem_SELEX	5511	11	198	1	0.331592	0.931879		Fer2_da_SOLEXA_5	9759	2294	505	123	0.33881	0.255342		CG4404_SOLEXA	9759	2217	500	98	0.962734	0.999662		br_PA_SOLEXA_5	9759
l_3_neo38_SOLEXA_2.5	9669	879	202	26	0.043764	0.123536		Eip93F_SOLEXA	5225	475	200	27	0.0227598	0.0634429		CG7928_SOLEXA_5	14894	1354	200	28	0.0141547	0.0357796		ttk_PA_SOLEXA_5	5511	11	200	1	0.334357	0.931879		HLH4C_SOLEXA_5	9759	2294	501	123	0.302166	0.255342		CG4854_SOLEXA_5	9759	2217	500	119	0.293019	0.999662		cic_SOLEXA	9759
lola_PF_SOLEXA_2.5	9669	879	198	25	0.0571302	0.15925		cas_SELEX	5225	475	200	27	0.0227598	0.0634429		Hth_SOLEXA	14894	1354	200	28	0.0141547	0.0357796		Usf_SOLEXA_5	5511	11	199	1	0.332976	0.931879		HLH4C_da_SOLEXA_5	9759	2294	504	123	0.329507	0.255342		CG5669_SOLEXA_5	9759	2217	501	102	0.912451	0.999662		cnc_maf_s_SELEX	9759
Bteb2_SOLEXA_2.5	9669	879	200	25	0.0628918	0.159374		Mes2_SOLEXA	5225	475	201	27	0.0241265	0.0664222		jim_F1_9_SOLEXA_2.5	14894	1354	200	27	0.0242545	0.0563764		vri_SOLEXA	5511	11	199	1	0.332976	0.931879		HLH54F_da_SOLEXA_5	9759	2294	501	124	0.265883	0.255342		CG6276_SOLEXA	9759	2217	501	117	0.381294	0.999662		crol_F7_16_SOLEXA_2.5	9759
bab1_SOLEXA	9669	879	200	25	0.0628918	0.159374		sage_da_SOLEXA_5	5225	475	198	26	0.0341574	0.0917723		Adf1_SOLEXA	14894	1354	200	27	0.0242545	0.0563764		HLH106_SOLEXA_5_4	5511	11	207	1	0.343953	0.935385		Hmx_SOLEXA	9759	2294	500	123	0.293258	0.255342		CG7056_SOLEXA	9759	2217	501	101	0.929008	0.999662		cwo_SOLEXA_5	9759
sage_da_SOLEXA_5	9669	879	199	25	0.059962	0.159374		grh_FlyReg	5225	475	198	26	0.0341574	0.0917723		ab_SOLEXA_5	14894	1354	200	27	0.0242545	0.0563764		ab_SOLEXA_5	5511	11	199	0	1	1		Parx_da_SOLEXA_5	9759	2294	500	122	0.331232	0.255342		CG7368_SOLEXA_2.5	9759	2217	504	117	0.41014	0.999662		dys_tgo_SOLEXA_5	9759
ab_SOLEXA_5	9669	879	200	25	0.0628918	0.159374		Tin_SOLEXA	5225	475	199	26	0.0360665	0.0924464		dsx_SELEX	14894	1354	200	27	0.0242545	0.0563764		Achi_SOLEXA	5511	11	200	0	1	1		Rel_SANGER	9759	2294	500	122	0.331232	0.255342		CG7928_SOLEXA_5	9759	2217	502	111	0.647914	0.999662		gt_SOLEXA	9759
CG4404_SOLEXA	9669	879	199	25	0.059962	0.159374		mef2_compiled	5225	475	199	26	0.0360665	0.0924464		CG12029_SOLEXA_5	14894	1354	200	27	0.0242545	0.0563764		acj6_SOLEXA	5511	11	200	0	1	1		Stat92E_SELEX	9759	2294	501	124	0.265883	0.255342		CG8319_SOLEXA_2.5	9759	2217	500	116	0.413682	0.999662		hb_SOLEXA_5	9759
CG4360_F1_3_SOLEXA_2.5	9669	879	200	25	0.0628918	0.159374		br_PA_SOLEXA_5	5225	475	199	26	0.0360665	0.0924464		kay_Jra_SANGER	14894	1354	200	27	0.0242545	0.0563764		Antp_SOLEXA	5511	11	200	0	1	1		Tin_SOLEXA	9759	2294	505	123	0.33881	0.255342		CG8765_SOLEXA	9759	2217	503	104	0.881085	0.999662		kay_Jra_SANGER	9759
CG8765_SOLEXA	9669	879	200	25	0.0628918	0.159374		eyg_SOLEXA_t50	5225	475	199	26	0.0360665	0.0924464		tap_da_SOLEXA_5	14894	1354	200	27	0.0242545	0.0563764		apt_SELEX	5511	11	200	0	1	1		bab1_SOLEXA	9759	2294	500	124	0.257498	0.255342		CG9437_SOLEXA	9759	2217	501	118	0.340587	0.999662		nau_SOLEXA_5	9759
Ct_SOLEXA	9669	879	199	25	0.059962	0.159374		HLH54F_da_SOLEXA_5	5225	475	200	26	0.0380549	0.0932554		D19A_F10_12_SANGER_5	14894	1354	200	26	0.0400294	0.0879862		Ara_SOLEXA	5511	11	199	0	1	1		br_PC_SOLEXA_10	9759	2294	502	123	0.31118	0.255342		Cf2_PA_SOLEXA_2.5	9759	2217	504	118	0.368511	0.999662		pfk_SOLEXA	9759
dsx_SELEX	9669	879	197	24	0.0846967	0.212217		HLH4C_SOLEXA_5	5225	475	200	26	0.0380549	0.0932554		Kr_SOLEXA_2.5	14894	1354	200	26	0.0400294	0.0879862		Atf_2_SOLEXA	5511	11	200	0	1	1		br_PE_SOLEXA_5	9759	2294	501	122	0.340588	0.255342		CrebA_SOLEXA	9759	2217	501	88	0.998437	0.999662		tgo_sima_SOLEXA_5	9759
pho_SOLEXA_5	9669	879	198	24	0.0884989	0.219281		kay_Jra_SANGER	5225	475	200	26	0.0380549	0.0932554		foxo_SOLEXA	14894	1354	200	26	0.0400294	0.0879862		Atf6_SOLEXA	5511	11	200	0	1	1		dimm_da_SOLEXA_5	9759	2294	502	123	0.31118	0.255342		Ct_SOLEXA	9759	2217	502	111	0.647914	0.999662		Cf2_PB_SOLEXA_5	9759
gt_SOLEXA	9669	879	199	24	0.0924126	0.221591		CG4854_SOLEXA_5	5225	475	200	26	0.0380549	0.0932554		HLH4C_SOLEXA_5	14894	1354	200	26	0.0400294	0.0879862		Awh_SOLEXA	5511	11	200	0	1	1		ey_SOLEXA	9759	2294	503	124	0.283019	0.255342		D19B_SOLEXA_5	9759	2217	503	113	0.57325	0.999662		Adf1_SOLEXA	9759
CG9437_SOLEXA	9669	879	199	24	0.0924126	0.221591		CG5180_SOLEXA	5225	475	201	26	0.0401243	0.0972577		lola_PO_SOLEXA	14894	1354	200	26	0.0400294	0.0879862		bab1_SOLEXA	5511	11	199	0	1	1		grh_FlyReg	9759	2294	500	123	0.293258	0.255342		Deaf1_FlyReg	9759	2217	500	117	0.371787	0.999662		Med_FlyReg	9759
lola_PQ_SOLEXA	9669	879	199	24	0.0924126	0.221591		HLH4C_da_SOLEXA_5	5225	475	200	25	0.0611628	0.139177		SuH_compiled	14894	1354	201	26	0.0421612	0.0907004		Bap_SOLEXA	5511	11	200	0	1	1		gsb_SOLEXA	9759	2294	503	123	0.320296	0.255342		Dfd_SOLEXA	9759	2217	500	99	0.952546	0.999662		crp_SOLEXA_5	9759
Rel_SANGER	9669	879	200	24	0.0964381	0.228784		Kr_SOLEXA_2.5	5225	475	200	25	0.0611628	0.139177		br_PA_SOLEXA_5	14894	1354	201	26	0.0421612	0.0907004		Blimp_1_SOLEXA_5	5511	11	199	0	1	1		lola_PD_SOLEXA_5	9759	2294	500	123	0.293258	0.255342		Dif_Rel_SELEX	9759	2217	500	101	0.92567	0.999662		da_SOLEXA_5	9759
br_PL_SOLEXA_5	9669	879	201	24	0.100576	0.236089		CG12029_SOLEXA_5	5225	475	200	25	0.0611628	0.139177		l_3_neo38_SOLEXA_2.5	14894	1354	200	25	0.0636003	0.129911		br_PA_SOLEXA_5	5511	11	198	0	1	1		lola_PL_SOLEXA_2.5	9759	2294	502	124	0.274391	0.255342		Dip3_SOLEXA	9759	2217	501	115	0.466566	0.999662		BtbVII_SOLEXA	9759
Deaf1_FlyReg	9669	879	200	23	0.142212	0.293641		Cf2_PA_SOLEXA_2.5	5225	475	200	25	0.0611628	0.139177		CG4404_SOLEXA	14894	1354	200	25	0.0636003	0.129911		br_PC_SOLEXA_10	5511	11	200	0	1	1		lola_PO_SOLEXA	9759	2294	503	123	0.320296	0.255342		Doc2_SOLEXA	9759	2217	500	114	0.50025	0.999662		Hr78_SOLEXA	9759
Crc_CG6272_SOLEXA	9669	879	200	23	0.142212	0.293641		dl_NBT	5225	475	200	25	0.0611628	0.139177		Lag1_SOLEXA	14894	1354	200	25	0.0636003	0.129911		br_PE_SOLEXA_5	5511	11	199	0	1	1		lola_PQ_SOLEXA	9759	2294	500	122	0.331232	0.255342		E5_SOLEXA	9759	2217	501	118	0.340587	0.999662		GATAd_SOLEXA	9759
CG12029_SOLEXA_5	9669	879	199	23	0.136948	0.293641		lola_PO_SOLEXA	5225	475	199	25	0.0582743	0.139177		bowl_SOLEXA_5	14894	1354	200	25	0.0636003	0.129911		brk_FlyReg	5511	11	200	0	1	1		opa_SOLEXA_5	9759	2294	502	123	0.31118	0.255342		Eip93F_SOLEXA	9759	2217	500	106	0.811732	0.999662		pad_SOLEXA_5	9759
peb_F5_7_SOLEXA_2.5	9669	879	199	23	0.136948	0.293641		sob_F3_5_SOLEXA_5	5225	475	197	24	0.0828125	0.186537		Xrp1_CG6272_SOLEXA	14894	1354	200	25	0.0636003	0.129911		C15_SOLEXA	5511	11	202	0	1	1		ovo_SOLEXA_5	9759	2294	500	122	0.331232	0.255342		Ets21C_SOLEXA	9759	2217	501	121	0.23087	0.999662		CG11071_SOLEXA_5	9759
lola_PL_SOLEXA_2.5	9669	879	199	23	0.136948	0.293641		sr_SOLEXA_5	5225	475	200	24	0.0944597	0.196865		Mes2_SOLEXA	14894	1354	201	25	0.0666456	0.134771		cas_SELEX	5511	11	199	0	1	1		tll_SOLEXA	9759	2294	500	123	0.293258	0.255342		Ets98B_SOLEXA	9759	2217	506	122	0.236392	0.999662		Dip3_SOLEXA	9759
her_SOLEXA_10	9669	879	199	23	0.136948	0.293641		z_FlyReg	5225	475	200	24	0.0944597	0.196865		vfl_SOLEXA_5	14894	1354	200	24	0.0972453	0.182083		Cf2_PA_SOLEXA_2.5	5511	11	200	0	1	1		tap_da_SOLEXA_5	9759	2294	502	122	0.35003	0.259822		Fer1_da_SOLEXA_5	9759	2217	504	120	0.29033	0.999662		Mad_FlyReg	9759
Cf2_PA_SOLEXA_2.5	9669	879	199	23	0.136948	0.293641		lola_PF_SOLEXA_2.5	5225	475	199	24	0.0904641	0.196865		CG10904_SOLEXA	14894	1354	200	24	0.0972453	0.182083		CG10267_F1_3_SOLEXA_5	5511	11	200	0	1	1		Cf2_PA_SOLEXA_2.5	9759	2294	504	122	0.369146	0.264967		Fer2_da_SOLEXA_5	9759	2217	505	117	0.419844	0.999662		peb_F5_7_SOLEXA_2.5	9759
mef2_compiled	9669	879	200	23	0.142212	0.293641		Deaf1_FlyReg	5225	475	200	24	0.0944597	0.196865		lola_PJ_SOLEXA	14894	1354	200	24	0.0972453	0.182083		CG10267_SOLEXA_5	5511	11	200	0	1	1		Lim3_SOLEXA	9759	2294	500	121	0.371098	0.264967		GATAd_SOLEXA	9759	2217	500	121	0.223256	0.999662		Aef1_SOLEXA_5	9759
cic_SOLEXA	9669	879	199	23	0.136948	0.293641		tj_SOLEXA	5225	475	199	24	0.0904641	0.196865		z_FlyReg	14894	1354	200	24	0.0972453	0.182083		CG11504_SOLEXA	5511	11	200	0	1	1		cas_SELEX	9759	2294	500	121	0.371098	0.264967		Gsc_SOLEXA	9759	2217	503	99	0.959255	0.999662		CG4854_SOLEXA_5	9759
fkh_NAR	9669	879	198	23	0.1318	0.293641		Ets98B_SOLEXA	5225	475	200	24	0.0944597	0.196865		CG4360_F1_3_SOLEXA_2.5	14894	1354	200	24	0.0972453	0.182083		CG11723_SOLEXA	5511	11	199	0	1	1		ttk_PA_SOLEXA_5	9759	2294	500	121	0.371098	0.264967		HLH4C_SOLEXA_5	9759	2217	501	94	0.988181	0.999662		CG7928_SOLEXA_5	9759
CG10267_F1_3_SOLEXA_5	9669	879	200	23	0.142212	0.293641		ttk_PF_SOLEXA_5	5225	475	200	24	0.0944597	0.196865		peb_F5_7_SOLEXA_2.5	14894	1354	200	24	0.0972453	0.182083		CG12029_SOLEXA_5	5511	11	200	0	1	1		acj6_SOLEXA	9759	2294	501	121	0.380813	0.266822		HLH4C_da_SOLEXA_5	9759	2217	504	99	0.961307	0.999662		toy_SOLEXA	9759
disco_SOLEXA_5	9669	879	199	23	0.136948	0.293641		Hr39_SOLEXA	5225	475	199	24	0.0904641	0.196865		eyg_SOLEXA_t50	14894	1354	200	24	0.0972453	0.182083		CG12236_PA_SOLEXA_5	5511	11	200	0	1	1		gsb_n_SOLEXA	9759	2294	501	121	0.380813	0.266822		HLH54F_da_SOLEXA_5	9759	2217	501	93	0.991287	0.999662		Bteb2_SOLEXA_2.5	9759
CG5180_SOLEXA	9669	879	197	23	0.12677	0.293641		ovo_SOLEXA_5	5225	475	202	24	0.102793	0.212249		crol_F7_16_SOLEXA_2.5	14894	1354	200	24	0.0972453	0.182083		CG12605_SOLEXA_5	5511	11	199	0	1	1		CG12236_PB_SOLEXA_2.5	9759	2294	502	120	0.432454	0.270179		Hand_da_SOLEXA_5	9759	2217	501	104	0.871157	0.999662		CG11504_SOLEXA	9759
Blimp_1_SOLEXA_5	9669	879	197	22	0.182364	0.373094		lola_PL_SOLEXA_2.5	5225	475	198	23	0.129758	0.265469		CG10267_SOLEXA_5	14894	1354	201	24	0.101394	0.18811		CG12768_SOLEXA	5511	11	199	0	1	1		CG12768_SOLEXA	9759	2294	503	121	0.400421	0.270179		Hey_SOLEXA_5	9759	2217	500	100	0.940269	0.999662		CG12236_PA_SOLEXA_5	9759
hb_SOLEXA_5	9669	879	200	22	0.201654	0.387662		CG10904_SOLEXA	5225	475	199	23	0.134893	0.268582		ken_SOLEXA_5	14894	1354	200	23	0.143051	0.235185		CG14962_SOLEXA_5	5511	11	199	0	1	1		Dip3_SOLEXA	9759	2294	501	120	0.422446	0.270179		Hmx_SOLEXA	9759	2217	500	109	0.709256	0.999662		CG12605_SOLEXA_5	9759
vri_SOLEXA	9669	879	199	22	0.195115	0.387662		lola_PQ_SOLEXA	5225	475	199	23	0.134893	0.268582		lola_PL_SOLEXA_2.5	14894	1354	200	23	0.143051	0.235185		CG15696_SOLEXA	5511	11	198	0	1	1		Her_SOLEXA_5	9759	2294	501	120	0.422446	0.270179		Hr39_SOLEXA	9759	2217	500	109	0.709256	0.999662		CG12768_SOLEXA	9759
HLH4C_SOLEXA_5	9669	879	200	22	0.201654	0.387662		dimm_da_SOLEXA_5	5225	475	199	23	0.134893	0.268582		her_SOLEXA_10	14894	1354	200	23	0.143051	0.235185		CG1621_SOLEXA	5511	11	200	0	1	1		Hr83_SOLEXA	9759	2294	502	120	0.432454	0.270179		Hr46_SOLEXA	9759	2217	501	104	0.871157	0.999662		CG15601_SOLEXA	9759
fru_PI_SOLEXA_5	9669	879	199	22	0.195115	0.387662		ttk_PA_SOLEXA_5	5225	475	200	23	0.140147	0.269421		Cf2_PA_SOLEXA_2.5	14894	1354	200	23	0.143051	0.235185		CG17181_SOLEXA_5	5511	11	201	0	1	1		SuH_compiled	9759	2294	500	120	0.412474	0.270179		Hr51_SOLEXA	9759	2217	507	118	0.397022	0.999662		CG9437_SOLEXA	9759
Sox14_SOLEXA	9669	879	199	22	0.195115	0.387662		dsx_SELEX	5225	475	200	23	0.140147	0.269421		mef2_compiled	14894	1354	200	23	0.143051	0.235185		CG3065_F1_5_SOLEXA_2.5	5511	11	201	0	1	1		hkb_SOLEXA_5	9759	2294	500	120	0.412474	0.270179		Hr78_SOLEXA	9759	2217	501	104	0.871157	0.999662		Crc_CG6272_SOLEXA	9759
ac_da_SOLEXA_5	9669	879	200	22	0.201654	0.387662		C15_SOLEXA	5225	475	200	23	0.140147	0.269421		cic_SOLEXA	14894	1354	200	23	0.143051	0.235185		CG31670_SOLEXA_5	5511	11	200	0	1	1		lola_PG_SOLEXA_	9759	2294	500	120	0.412474	0.270179		Hr83_SOLEXA	9759	2217	502	96	0.980227	0.999662		Fer1_da_SOLEXA_5	9759
NFAT_SOLEXA	9669	879	200	22	0.201654	0.387662		bowl_SOLEXA_5	5225	475	200	23	0.140147	0.269421		fru_PI_SOLEXA_5	14894	1354	200	23	0.143051	0.235185		CG31782_SOLEXA_5	5511	11	201	0	1	1		lola_PJ_SOLEXA	9759	2294	502	120	0.432454	0.270179		Hsf_compiled	9759	2217	503	106	0.830843	0.999662		Hand_da_SOLEXA_5	9759
kay_Jra_SANGER	9669	879	201	22	0.208298	0.393649		CG10267_SOLEXA_5	5225	475	201	23	0.14552	0.275008		Sox14_SOLEXA	14894	1354	200	23	0.143051	0.235185		CG32830_SOLEXA_5	5511	11	199	0	1	1		sd_FlyReg	9759	2294	502	121	0.39059	0.270179		Ind_Cell	9759	2217	501	94	0.988181	0.999662		Hey_SOLEXA_5	9759
Atf6_SOLEXA	9669	879	201	22	0.208298	0.393649		gl_SOLEXA_5	5225	475	201	23	0.14552	0.275008		CG4854_SOLEXA_5	14894	1354	200	23	0.143051	0.235185		CG4360_F1_3_SOLEXA_2.5	5511	11	200	0	1	1		sug_SOLEXA_5	9759	2294	502	120	0.432454	0.270179		Kr_SOLEXA_2.5	9759	2217	500	92	0.993222	0.999662		Hmx_SOLEXA	9759
opa_SOLEXA_5	9669	879	199	21	0.267284	0.484588		ab_SOLEXA_5	5225	475	199	22	0.193187	0.347425		dimm_da_SOLEXA_5	14894	1354	200	23	0.143051	0.235185		CG4404_SOLEXA	5511	11	200	0	1	1		toy_SOLEXA	9759	2294	502	120	0.432454	0.270179		Lag1_SOLEXA	9759	2217	506	123	0.204552	0.999662		Hr51_SOLEXA	9759
ci_SOLEXA_5	9669	879	199	21	0.267284	0.484588		CG12236_PA_SOLEXA_5	5225	475	199	22	0.193187	0.347425		CG3919_SOLEXA	14894	1354	200	23	0.143051	0.235185		CG5953_SOLEXA	5511	11	201	0	1	1		vfl_SOLEXA_5	9759	2294	502	120	0.432454	0.270179		Lim3_SOLEXA	9759	2217	500	119	0.293019	0.999662		Poxm_SOLEXA	9759
CG4854_SOLEXA_5	9669	879	199	21	0.267284	0.484588		crol_F7_16_SOLEXA_2.5	5225	475	199	22	0.193187	0.347425		tj_SOLEXA	14894	1354	200	23	0.143051	0.235185		CG6276_SOLEXA	5511	11	200	0	1	1		CG5669_SOLEXA_5	9759	2294	501	119	0.465043	0.270269		Max_Mnt_SOLEXA_5	9759	2217	500	101	0.92567	0.999662		Tin_SOLEXA	9759
lola_PD_SOLEXA_5	9669	879	199	21	0.267284	0.484588		CG11723_SOLEXA	5225	475	198	22	0.186742	0.347425		sob_F3_5_SOLEXA_5	14894	1354	200	23	0.143051	0.235185		CG7056_SOLEXA	5511	11	199	0	1	1		Dif_Rel_SELEX	9759	2294	500	119	0.454925	0.270269		Mes2_SOLEXA	9759	2217	500	115	0.456667	0.999662		bab1_SOLEXA	9759
CG15696_SOLEXA	9669	879	199	21	0.267284	0.484588		tgo_ss_SOLEXA_5	5225	475	199	22	0.193187	0.347425		Ets21C_SOLEXA	14894	1354	200	23	0.143051	0.235185		CG7928_SOLEXA_5	5511	11	200	0	1	1		HLH106_SOLEXA_5_4	9759	2294	501	119	0.465043	0.270269		Met_SOLEXA_5	9759	2217	503	106	0.830843	0.999662		dimm_da_SOLEXA_5	9759
Antp_SOLEXA	9669	879	200	21	0.274984	0.494527		Eip74EF_SOLEXA	5225	475	199	22	0.193187	0.347425		Atf6_SOLEXA	14894	1354	201	23	0.148433	0.242066		CG8281_SOLEXA	5511	11	200	0	1	1		Hth_SOLEXA	9759	2294	500	119	0.454925	0.270269		Oli_da_SOLEXA_5_1	9759	2217	505	109	0.749802	0.999662		disco_SOLEXA_5	9759
salr_F3_5_SOLEXA_2.5	9669	879	201	21	0.282764	0.500447		Atf6_SOLEXA	5225	475	201	22	0.206407	0.368229		vvl_SOLEXA	14894	1354	200	22	0.202429	0.298796		CG8319_SOLEXA_2.5	5511	11	200	0	1	1		br_PL_SOLEXA_5	9759	2294	500	119	0.454925	0.270269		Optix_SOLEXA	9759	2217	501	113	0.553742	0.999662		eg_SOLEXA	9759
sens_SOLEXA_5	9669	879	201	21	0.282764	0.500447		D19B_SOLEXA_5	5225	475	200	21	0.273504	0.448466		sd_FlyReg	14894	1354	200	22	0.202429	0.298796		chinmo_SOLEXA_15	5511	11	198	0	1	1		dsx_SELEX	9759	2294	501	119	0.465043	0.270269		Parx_da_SOLEXA_5	9759	2217	500	98	0.962734	0.999662		gl_SOLEXA_5	9759
jigr1_SOLEXA	9669	879	200	20	0.360745	0.587197		da_SOLEXA_5	5225	475	199	21	0.265759	0.448466		CG8765_SOLEXA	14894	1354	200	22	0.202429	0.298796		ci_SOLEXA_5	5511	11	199	0	1	1		dys_tgo_SOLEXA_5	9759	2294	503	120	0.44249	0.270269		Poxm_SOLEXA	9759	2217	500	117	0.371787	0.999662		grh_FlyReg	9759
Med_FlyReg	9669	879	200	20	0.360745	0.587197		vfl_SOLEXA_5	5225	475	200	21	0.273504	0.448466		CG9437_SOLEXA	14894	1354	200	22	0.202429	0.298796		cnc_maf_s_SELEX	5511	11	200	0	1	1		lola_PY_SOLEXA_5	9759	2294	500	119	0.454925	0.270269		Rel_SANGER	9759	2217	500	92	0.993222	0.999662		gsb_SOLEXA	9759
gsb_SOLEXA	9669	879	200	20	0.360745	0.587197		CG12768_SOLEXA	5225	475	199	21	0.265759	0.448466		br_PL_SOLEXA_5	14894	1354	200	22	0.202429	0.298796		Crc_CG6272_SOLEXA	5511	11	200	0	1	1		mef2_compiled	9759	2294	501	119	0.465043	0.270269		Side_SOLEXA_5	9759	2217	500	84	0.999662	0.999662		lola_PP_SOLEXA_2.5	9759
Hth_SOLEXA	9669	879	200	20	0.360745	0.587197		D19A_F10_12_SANGER_5	5225	475	198	21	0.2581	0.448466		salr_F3_5_SOLEXA_2.5	14894	1354	200	22	0.202429	0.298796		crol_F7_16_SOLEXA_2.5	5511	11	199	0	1	1		BtbVII_SOLEXA	9759	2294	501	118	0.508123	0.274061		Sox14_SOLEXA	9759	2217	501	107	0.787427	0.999662		pros_SELEX	9759
tap_da_SOLEXA_5	9669	879	200	20	0.360745	0.587197		CG12155_SOLEXA	5225	475	200	21	0.273504	0.448466		CG12605_SOLEXA_5	14894	1354	200	22	0.202429	0.298796		cwo_SOLEXA_5	5511	11	199	0	1	1		CG10904_SOLEXA	9759	2294	503	119	0.485296	0.274061		Sox15_SOLEXA	9759	2217	500	112	0.58714	0.999662		retn_SOLEXA	9759
br_PA_SOLEXA_5	9669	879	200	20	0.360745	0.587197		ken_SOLEXA_5	5225	475	199	21	0.265759	0.448466		eg_SOLEXA	14894	1354	200	22	0.202429	0.298796		D19A_F10_12_SANGER_5	5511	11	203	0	1	1		CG12155_SOLEXA	9759	2294	500	118	0.497977	0.274061		Stat92E_SELEX	9759	2217	501	114	0.510172	0.999662		rib_SOLEXA	9759
dimm_da_SOLEXA_5	9669	879	199	20	0.352168	0.587197		CG7928_SOLEXA_5	5225	475	200	21	0.273504	0.448466		Dif_Rel_SELEX	14894	1354	200	22	0.202429	0.298796		da_SOLEXA_5	5511	11	199	0	1	1		Eip93F_SOLEXA	9759	2294	500	118	0.497977	0.274061		SuH_compiled	9759	2217	500	117	0.371787	0.999662		tai_SOLEXA_5	9759
Aef1_SOLEXA_5	9669	879	199	20	0.352168	0.587197		CG8765_SOLEXA	5225	475	200	21	0.273504	0.448466		grh_FlyReg	14894	1354	200	22	0.202429	0.298796		Deaf1_FlyReg	5511	11	201	0	1	1		Sox14_SOLEXA	9759	2294	501	118	0.508123	0.274061		Tin_SOLEXA	9759	2217	505	110	0.713478	0.999662		tj_SOLEXA	9759
CG8281_SOLEXA	9669	879	200	20	0.360745	0.587197		Aef1_SOLEXA_5	5225	475	198	21	0.2581	0.448466		CG5953_SOLEXA	14894	1354	200	22	0.202429	0.298796		Dfd_SOLEXA	5511	11	199	0	1	1		br_PA_SOLEXA_5	9759	2294	503	119	0.485296	0.274061		Trl_FlyReg	9759	2217	500	116	0.413682	0.999662		trem_SELEX	9759
Lim3_SOLEXA	9669	879	200	20	0.360745	0.587197		Her_SOLEXA_5	5225	475	199	21	0.265759	0.448466		lola_PU_SOLEXA_5	14894	1354	200	22	0.202429	0.298796		Dif_Rel_SELEX	5511	11	199	0	1	1		cic_SOLEXA	9759	2294	501	118	0.508123	0.274061		Usf_SOLEXA_5	9759	2217	506	117	0.429584	0.999662		vvl_SOLEXA	9759
tll_SOLEXA	9669	879	199	20	0.352168	0.587197		CG12605_SOLEXA_5	5225	475	201	21	0.281332	0.454616		slbo_SOLEXA	14894	1354	200	22	0.202429	0.298796		Dip3_SOLEXA	5511	11	201	0	1	1		ftz_f1_SOLEXA_2	9759	2294	500	118	0.497977	0.274061		Xrp1_CG6272_SOLEXA	9759	2217	503	114	0.529949	0.999662		CG12236_PB_SOLEXA_2.5	9759
esg_F3_5_SOLEXA	9669	879	201	20	0.369361	0.596866		AbdB_SOLEXA	5225	475	201	21	0.281332	0.454616		fkh_NAR	14894	1354	201	22	0.209065	0.306356		disco_SOLEXA_5	5511	11	199	0	1	1		jim_F1_9_SOLEXA_2.5	9759	2294	501	118	0.508123	0.274061		ab_SOLEXA_5	9759	2217	500	87	0.998849	0.999662		CG15696_SOLEXA	9759
gsb_n_SOLEXA	9669	879	200	19	0.455618	0.686506		gcm_SELEX	5225	475	200	20	0.359956	0.573359		CG13897_SOLEXA	14894	1354	200	21	0.275582	0.3817		dl_NBT	5511	11	200	0	1	1		rib_SOLEXA	9759	2294	507	120	0.482794	0.274061		ac_da_SOLEXA_5	9759	2217	500	112	0.58714	0.999662		Lag1_SOLEXA	9759
Bap_SOLEXA	9669	879	200	19	0.455618	0.686506		pfk_SOLEXA	5225	475	200	20	0.359956	0.573359		lola_PF_SOLEXA_2.5	14894	1354	200	21	0.275582	0.3817		Doc2_SOLEXA	5511	11	199	0	1	1		Atf_2_SOLEXA	9759	2294	503	117	0.571156	0.278818		acj6_SOLEXA	9759	2217	501	118	0.340587	0.999662		onecut_SOLEXA	9759
Mes2_SOLEXA	9669	879	199	19	0.446605	0.686506		foxo_SOLEXA	5225	475	201	20	0.368644	0.578927		CG10267_F1_3_SOLEXA_5	14894	1354	200	21	0.275582	0.3817		dsx_SELEX	5511	11	199	0	1	1		C15_SOLEXA	9759	2294	500	117	0.541132	0.278818		apt_SELEX	9759	2217	500	108	0.746016	0.999662		AbdB_SOLEXA	9759
CG12605_SOLEXA_5	9669	879	200	19	0.455618	0.686506		lola_PW_SOLEXA	5225	475	201	20	0.368644	0.578927		gcm_SELEX	14894	1354	200	21	0.275582	0.3817		dys_tgo_SOLEXA_5	5511	11	199	0	1	1		CG3919_SOLEXA	9759	2294	504	117	0.581053	0.278818		bab1_SOLEXA	9759	2217	500	107	0.780249	0.999662		CG10267_F1_3_SOLEXA_5	9759
dl_NBT	9669	879	199	19	0.446605	0.686506		Lag1_SOLEXA	5225	475	202	20	0.37737	0.588485		CG7368_SOLEXA_2.5	14894	1354	200	21	0.275582	0.3817		E5_SOLEXA	5511	11	199	0	1	1		CG5180_SOLEXA	9759	2294	500	116	0.583887	0.278818		bowl_SOLEXA_5	9759	2217	502	99	0.957113	0.999662		CG13897_SOLEXA	9759
CG1621_SOLEXA	9669	879	199	19	0.446605	0.686506		Ara_SOLEXA	5225	475	199	19	0.446598	0.639116		ovo_SOLEXA_5	14894	1354	200	21	0.275582	0.3817		Eip74EF_SOLEXA	5511	11	201	0	1	1		CG8281_SOLEXA	9759	2294	500	116	0.583887	0.278818		br_PA_SOLEXA_5	9759	2217	503	120	0.281796	0.999662		CG4360_F1_3_SOLEXA_2.5	9759
run_Bgb_NBT	9669	879	200	19	0.455618	0.686506		nub_SOLEXA	5225	475	200	19	0.455693	0.639116		Doc2_SOLEXA	14894	1354	200	21	0.275582	0.3817		Eip93F_SOLEXA	5511	11	200	0	1	1		CG8765_SOLEXA	9759	2294	503	117	0.571156	0.278818		br_PE_SOLEXA_5	9759	2217	501	99	0.954878	0.999662		br_PL_SOLEXA_5	9759
CG12236_PA_SOLEXA_5	9669	879	199	19	0.446605	0.686506		lola_PJ_SOLEXA	5225	475	200	19	0.455693	0.639116		cas_SELEX	14894	1354	200	21	0.275582	0.3817		esg_F3_5_SOLEXA	5511	11	199	0	1	1		Ets98B_SOLEXA	9759	2294	506	118	0.558431	0.278818		br_PL_SOLEXA_5	9759	2217	500	110	0.670266	0.999662		brk_FlyReg	9759
gl_SOLEXA_5	9669	879	200	19	0.455618	0.686506		CG13897_SOLEXA	5225	475	200	19	0.455693	0.639116		dl_NBT	14894	1354	200	20	0.361062	0.480355		Ets21C_SOLEXA	5511	11	200	0	1	1		Hr51_SOLEXA	9759	2294	507	118	0.568363	0.278818		byn_FlyReg	9759	2217	507	106	0.854203	0.999662		foxo_SOLEXA	9759
cnc_maf_s_SELEX	9669	879	200	19	0.455618	0.686506		CG4360_F1_3_SOLEXA_2.5	5225	475	199	19	0.446598	0.639116		CG1621_SOLEXA	14894	1354	200	20	0.361062	0.480355		Ets98B_SOLEXA	5511	11	200	0	1	1		Hsf_compiled	9759	2294	503	117	0.571156	0.278818		cas_SELEX	9759	2217	500	100	0.940269	0.999662		lola_PL_SOLEXA_2.5	9759
CG3919_SOLEXA	9669	879	198	18	0.536771	0.773044		peb_F5_7_SOLEXA_2.5	5225	475	199	19	0.446598	0.639116		Awh_SOLEXA	14894	1354	200	20	0.361062	0.480355		Exd_SOLEXA	5511	11	200	0	1	1		cnc_maf_s_SELEX	9759	2294	500	117	0.541132	0.278818		chinmo_SOLEXA_15	9759	2217	506	120	0.307712	0.999662		sage_da_SOLEXA_5	9759
tj_SOLEXA	9669	879	199	18	0.545737	0.773044		Antp_SOLEXA	5225	475	200	19	0.455693	0.639116		Her_SOLEXA_5	14894	1354	200	20	0.361062	0.480355		eyg_SOLEXA_t50	5511	11	201	0	1	1		esg_F3_5_SOLEXA	9759	2294	504	118	0.538418	0.278818		ci_SOLEXA_5	9759	2217	501	115	0.466566	0.999662		Dfd_SOLEXA	9759
eg_SOLEXA	9669	879	199	18	0.545737	0.773044		CG1621_SOLEXA	5225	475	199	19	0.446598	0.639116		chinmo_SOLEXA_15	14894	1354	200	20	0.361062	0.480355		foxo_SOLEXA	5511	11	200	0	1	1		gt_SOLEXA	9759	2294	502	117	0.561199	0.278818		cic_SOLEXA	9759	2217	501	120	0.265064	0.999662		gsb_n_SOLEXA	9759
Dif_Rel_SELEX	9669	879	199	18	0.545737	0.773044		Awh_SOLEXA	5225	475	200	19	0.455693	0.639116		Eip74EF_SOLEXA	14894	1354	200	20	0.361062	0.480355		fru_PI_SOLEXA_5	5511	11	200	0	1	1		hb_SOLEXA_5	9759	2294	500	117	0.541132	0.278818		crol_F7_16_SOLEXA_2.5	9759	2217	500	114	0.50025	0.999662		hkb_SOLEXA_5	9759
gcm_SELEX	9669	879	200	18	0.55465	0.773044		Optix_SOLEXA	5225	475	200	19	0.455693	0.639116		lola_PD_SOLEXA_5	14894	1354	201	20	0.36965	0.485394		GATAd_SOLEXA	5511	11	200	0	1	1		jigr1_SOLEXA	9759	2294	500	116	0.583887	0.278818		crp_SOLEXA_5	9759	2217	506	108	0.790674	0.999662		lola_PF_SOLEXA_2.5	9759
Awh_SOLEXA	9669	879	199	18	0.545737	0.773044		lola_PC_SOLEXA_5	5225	475	200	19	0.455693	0.639116		run_Bgb_NBT	14894	1354	201	20	0.36965	0.485394		gce_SOLEXA_5	5511	11	199	0	1	1		nub_SOLEXA	9759	2294	503	117	0.571156	0.278818		cwo_SOLEXA_5	9759	2217	501	105	0.846179	0.999662		lola_PK_SOLEXA	9759
br_PC_SOLEXA_10	9669	879	199	18	0.545737	0.773044		Doc2_SOLEXA	5225	475	199	19	0.446598	0.639116		Rel_SANGER	14894	1354	200	19	0.455587	0.572227		gcm_SELEX	5511	11	199	0	1	1		onecut_SOLEXA	9759	2294	500	117	0.541132	0.278818		da_SOLEXA_5	9759	2217	500	106	0.811732	0.999662		lola_PY_SOLEXA_5	9759
AbdB_SOLEXA	9669	879	199	18	0.545737	0.773044		br_PE_SOLEXA_5	5225	475	198	19	0.4375	0.639116		ac_da_SOLEXA_5	14894	1354	200	19	0.455587	0.572227		gl_SOLEXA_5	5511	11	199	0	1	1		peb_F5_7_SOLEXA_2.5	9759	2294	501	117	0.551189	0.278818		dimm_da_SOLEXA_5	9759	2217	502	109	0.725873	0.999662		pho_SOLEXA_5	9759
lola_PW_SOLEXA	9669	879	200	18	0.55465	0.773044		Stat92E_SELEX	5225	475	199	19	0.446598	0.639116		Aef1_SOLEXA_5	14894	1354	200	19	0.455587	0.572227		gsb_n_SOLEXA	5511	11	200	0	1	1		ttk_PF_SOLEXA_5	9759	2294	500	117	0.541132	0.278818		disco_SOLEXA_5	9759	2217	501	116	0.42344	0.999662		CG6276_SOLEXA	9759
Ets98B_SOLEXA	9669	879	200	18	0.55465	0.773044		chinmo_SOLEXA_15	5225	475	200	19	0.455693	0.639116		CG8281_SOLEXA	14894	1354	200	19	0.455587	0.572227		gsb_SOLEXA	5511	11	198	0	1	1		CG12605_SOLEXA_5	9759	2294	501	116	0.593738	0.279956		dl_NBT	9759	2217	501	93	0.991287	0.999662		CG14962_SOLEXA_5	9759
Dfd_SOLEXA	9669	879	200	18	0.55465	0.773044		dys_tgo_SOLEXA_5	5225	475	199	19	0.446598	0.639116		Lim3_SOLEXA	14894	1354	200	19	0.455587	0.572227		Gsc_SOLEXA	5511	11	199	0	1	1		CG9437_SOLEXA	9759	2294	501	116	0.593738	0.279956		dsx_SELEX	9759	2217	501	103	0.893216	0.999662		Mes2_SOLEXA	9759
acj6_SOLEXA	9669	879	199	18	0.545737	0.773044		Hr78_SOLEXA	5225	475	201	19	0.46478	0.643764		esg_F3_5_SOLEXA	14894	1354	200	19	0.455587	0.572227		gt_SOLEXA	5511	11	201	0	1	1		Atf6_SOLEXA	9759	2294	500	114	0.666253	0.280616		dys_tgo_SOLEXA_5	9759	2217	503	122	0.213758	0.999662		lola_PQ_SOLEXA	9759
lola_PO_SOLEXA	9669	879	199	17	0.643655	0.840341		usp_SOLEXA	5225	475	201	19	0.46478	0.643764		br_PC_SOLEXA_10	14894	1354	200	19	0.455587	0.572227		h_SOLEXA_5	5511	11	200	0	1	1		CG10267_SOLEXA_5	9759	2294	503	116	0.613217	0.280616		eg_SOLEXA	9759	2217	500	118	0.331434	0.999662		tap_da_SOLEXA_5	9759
Lag1_SOLEXA	9669	879	199	17	0.643655	0.840341		sd_FlyReg	5225	475	199	18	0.546623	0.737514		Antp_SOLEXA	14894	1354	201	19	0.464558	0.576336		hb_SOLEXA_5	5511	11	199	0	1	1		CG32830_SOLEXA_5	9759	2294	503	115	0.654064	0.280616		esg_F3_5_SOLEXA	9759	2217	504	94	0.990205	0.999662		ey_SOLEXA	9759
eyg_SOLEXA_t50	9669	879	200	17	0.651923	0.840341		fkh_NAR	5225	475	200	18	0.555616	0.737514		Six4_SOLEXA_2	14894	1354	201	19	0.464558	0.576336		Hey_SOLEXA_5	5511	11	200	0	1	1		CG4360_F1_3_SOLEXA_2.5	9759	2294	502	116	0.603517	0.280616		ey_SOLEXA	9759	2217	503	104	0.881085	0.999662		mef2_compiled	9759
crol_F7_16_SOLEXA_2.5	9669	879	200	17	0.651923	0.840341		CG10267_F1_3_SOLEXA_5	5225	475	200	18	0.555616	0.737514		AbdB_SOLEXA	14894	1354	200	18	0.554258	0.667155		hkb_SOLEXA_5	5511	11	198	0	1	1		CG4854_SOLEXA_5	9759	2294	500	115	0.625748	0.280616		eyg_SOLEXA_t50	9759	2217	501	120	0.265064	0.999662		Sox15_SOLEXA	9759
sob_F3_5_SOLEXA_5	9669	879	199	17	0.643655	0.840341		sens_SOLEXA_5	5225	475	200	18	0.555616	0.737514		lola_PW_SOLEXA	14894	1354	200	18	0.554258	0.667155		Hmx_SOLEXA	5511	11	201	0	1	1		CG5953_SOLEXA	9759	2294	501	115	0.635285	0.280616		fkh_NAR	9759	2217	504	112	0.625153	0.999662		fru_PI_SOLEXA_5	9759
E5_SOLEXA	9669	879	199	17	0.643655	0.840341		Lbe_SOLEXA	5225	475	200	18	0.555616	0.737514		E5_SOLEXA	14894	1354	200	18	0.554258	0.667155		Hr39_SOLEXA	5511	11	199	0	1	1		Exd_SOLEXA	9759	2294	502	115	0.644725	0.280616		fru_PI_SOLEXA_5	9759	2217	500	112	0.58714	0.999662		lola_PJ_SOLEXA	9759
Optix_SOLEXA	9669	879	200	17	0.651923	0.840341		Ind_Cell	5225	475	199	18	0.546623	0.737514		peb_F1_3_SOLEXA_2.5	14894	1354	200	18	0.554258	0.667155		Hr78_SOLEXA	5511	11	200	0	1	1		GATAd_SOLEXA	9759	2294	500	114	0.666253	0.280616		ftz_f1_SOLEXA_2	9759	2217	500	106	0.811732	0.999662		Ind_Cell	9759
Hr83_SOLEXA	9669	879	199	17	0.643655	0.840341		CG6276_SOLEXA	5225	475	200	18	0.555616	0.737514		usp_SOLEXA	14894	1354	200	18	0.554258	0.667155		Hr83_SOLEXA	5511	11	200	0	1	1		NFAT_SOLEXA	9759	2294	504	116	0.622833	0.280616		gce_SOLEXA_5	9759	2217	505	121	0.262609	0.999662		sob_F3_5_SOLEXA_5	9759
Hr78_SOLEXA	9669	879	200	17	0.651923	0.840341		lola_PP_SOLEXA_2.5	5225	475	200	17	0.653644	0.796517		NFAT_SOLEXA	14894	1354	201	18	0.563081	0.673764		Hsf_compiled	5511	11	200	0	1	1		Poxm_SOLEXA	9759	2294	500	115	0.625748	0.280616		gcm_SELEX	9759	2217	500	112	0.58714	0.999662		sr_SOLEXA_5	9759
C15_SOLEXA	9669	879	199	17	0.643655	0.840341		br_PL_SOLEXA_5	5225	475	200	17	0.653644	0.796517		Ct_SOLEXA	14894	1354	200	17	0.651225	0.739835		Hth_SOLEXA	5511	11	201	0	1	1		Sox15_SOLEXA	9759	2294	500	114	0.666253	0.280616		gl_SOLEXA_5	9759	2217	501	101	0.929008	0.999662		CG3065_F1_5_SOLEXA_2.5	9759
Dip3_SOLEXA	9669	879	200	17	0.651923	0.840341		cic_SOLEXA	5225	475	200	17	0.653644	0.796517		lola_PQ_SOLEXA	14894	1354	200	17	0.651225	0.739835		Ind_Cell	5511	11	200	0	1	1		disco_SOLEXA_5	9759	2294	501	115	0.635285	0.280616		grh_FlyReg	9759	2217	500	109	0.709256	0.999662		CG4404_SOLEXA	9759
lola_PC_SOLEXA_5	9669	879	200	17	0.651923	0.840341		CG8281_SOLEXA	5225	475	198	17	0.636881	0.796517		Blimp_1_SOLEXA_5	14894	1354	200	17	0.651225	0.739835		jigr1_SOLEXA	5511	11	199	0	1	1		eg_SOLEXA	9759	2294	500	115	0.625748	0.280616		gsb_SOLEXA	9759	2217	503	110	0.696551	0.999662		Eip93F_SOLEXA	9759
Lbe_SOLEXA	9669	879	199	17	0.643655	0.840341		tll_SOLEXA	5225	475	199	17	0.645311	0.796517		tll_SOLEXA	14894	1354	200	17	0.651225	0.739835		jim_F1_9_SOLEXA_2.5	5511	11	200	0	1	1		fru_PI_SOLEXA_5	9759	2294	500	114	0.666253	0.280616		gsb_n_SOLEXA	9759	2217	501	108	0.753817	0.999662		Sox14_SOLEXA	9759
CG7368_SOLEXA_2.5	9669	879	201	17	0.660092	0.841146		run_Bgb_NBT	5225	475	199	17	0.645311	0.796517		CG12236_PA_SOLEXA_5	14894	1354	200	17	0.651225	0.739835		Kr_SOLEXA_2.5	5511	11	200	0	1	1		ken_SOLEXA_5	9759	2294	500	114	0.666253	0.280616		gt_SOLEXA	9759	2217	502	121	0.238615	0.999662		Xrp1_CG6272_SOLEXA	9759
apt_SELEX	9669	879	201	17	0.660092	0.841146		cnc_maf_s_SELEX	5225	475	200	17	0.653644	0.796517		Optix_SOLEXA	14894	1354	200	17	0.651225	0.739835		Lag1_SOLEXA	5511	11	200	0	1	1		lola_PK_SOLEXA	9759	2294	504	116	0.622833	0.280616		h_SOLEXA_5	9759	2217	501	105	0.846179	0.999662		dl_NBT	9759
Eip93F_SOLEXA	9669	879	200	16	0.741556	0.898733		Dif_Rel_SELEX	5225	475	199	17	0.645311	0.796517		CG12236_PB_SOLEXA_2.5	14894	1354	200	17	0.651225	0.739835		Lbe_SOLEXA	5511	11	199	0	1	1		lola_PU_SOLEXA_5	9759	2294	500	115	0.625748	0.280616		hb_SOLEXA_5	9759	2217	500	120	0.256874	0.999662		ftz_f1_SOLEXA_2	9759
bowl_SOLEXA_5	9669	879	199	16	0.734385	0.898733		Dfd_SOLEXA	5225	475	199	17	0.645311	0.796517		dys_tgo_SOLEXA_5	14894	1354	200	17	0.651225	0.739835		Lim3_SOLEXA	5511	11	197	0	1	1		pfk_SOLEXA	9759	2294	500	114	0.666253	0.280616		her_SOLEXA_10	9759	2217	502	120	0.273373	0.999662		lola_PA_SOLEXA_5	9759
grh_FlyReg	9669	879	200	16	0.741556	0.898733		E5_SOLEXA	5225	475	199	17	0.645311	0.796517		CG3838_SOLEXA	14894	1354	200	17	0.651225	0.739835		lola_PF_SOLEXA_2.5	5511	11	200	0	1	1		retn_SOLEXA	9759	2294	500	114	0.666253	0.280616		hkb_SOLEXA_5	9759	2217	500	108	0.746016	0.999662		opa_SOLEXA_5	9759
CG5953_SOLEXA	9669	879	199	16	0.734385	0.898733		CG12236_PB_SOLEXA_2.5	5225	475	197	17	0.628354	0.796517		tgo_ss_SOLEXA_5	14894	1354	201	17	0.659369	0.744902		lola_PJ_SOLEXA	5511	11	201	0	1	1		CG7056_SOLEXA	9759	2294	501	114	0.675376	0.281297		kay_Jra_SANGER	9759	2217	502	110	0.687906	0.999662		CG10904_SOLEXA	9759
ovo_SOLEXA_5	9669	879	199	16	0.734385	0.898733		peb_F1_3_SOLEXA_2.5	5225	475	199	17	0.645311	0.796517		nub_SOLEXA	14894	1354	200	16	0.74066	0.792466		lola_PL_SOLEXA_2.5	5511	11	199	0	1	1		vri_SOLEXA	9759	2294	501	114	0.675376	0.281297		klu_SOLEXA_5	9759	2217	501	111	0.638712	0.999662		peb_F1_3_SOLEXA_2.5	9759
Doc2_SOLEXA	9669	879	200	16	0.741556	0.898733		Hr51_SOLEXA	5225	475	196	17	0.619736	0.796517		disco_SOLEXA_5	14894	1354	200	16	0.74066	0.792466		lola_PO_SOLEXA	5511	11	200	0	1	1		CG13897_SOLEXA	9759	2294	502	114	0.684381	0.281916		l_3_neo38_SOLEXA_2.5	9759	2217	503	112	0.615767	0.999662		Blimp_1_SOLEXA_5	9759
Her_SOLEXA_5	9669	879	200	16	0.741556	0.898733		CG32830_SOLEXA_5	5225	475	200	17	0.653644	0.796517		sens_SOLEXA_5	14894	1354	200	16	0.74066	0.792466		lola_PP_SOLEXA_2.5	5511	11	200	0	1	1		Lbe_SOLEXA	9759	2294	502	114	0.684381	0.281916		lola_PA_SOLEXA_5	9759	2217	502	115	0.476471	0.999662		Ct_SOLEXA	9759
CG12236_PB_SOLEXA_2.5	9669	879	198	16	0.72709	0.898733		Hsf_compiled	5225	475	199	17	0.645311	0.796517		gl_SOLEXA_5	14894	1354	200	16	0.74066	0.792466		lola_PW_SOLEXA	5511	11	199	0	1	1		Fer1_da_SOLEXA_5	9759	2294	504	114	0.702026	0.287245		lola_PC_SOLEXA_5	9759	2217	500	102	0.908535	0.999662		lola_PW_SOLEXA	9759
br_PE_SOLEXA_5	9669	879	199	16	0.734385	0.898733		vvl_SOLEXA	5225	475	201	17	0.661875	0.797828		Ets98B_SOLEXA	14894	1354	200	16	0.74066	0.792466		Mad_FlyReg	5511	11	200	0	1	1		z_FlyReg	9759	2294	500	113	0.70498	0.287245		lola_PF_SOLEXA_2.5	9759	2217	501	90	0.996767	0.999662		tll_SOLEXA	9759
lola_PU_SOLEXA_5	9669	879	202	16	0.755521	0.910709		CG3919_SOLEXA	5225	475	201	17	0.661875	0.797828		Dfd_SOLEXA	14894	1354	200	16	0.74066	0.792466		Max_Mnt_SOLEXA_5	5511	11	198	0	1	1		Hr46_SOLEXA	9759	2294	501	113	0.713602	0.289186		lola_PG_SOLEXA_	9759	2217	500	97	0.971079	0.999662		D19B_SOLEXA_5	9759
Six4_SOLEXA_2	9669	879	200	15	0.818771	0.966063		Adf1_SOLEXA	5225	475	200	16	0.743759	0.877557		Hr83_SOLEXA	14894	1354	200	16	0.74066	0.792466		Med_FlyReg	5511	11	200	0	1	1		CG12236_PA_SOLEXA_5	9759	2294	503	113	0.730443	0.289562		lola_PJ_SOLEXA	9759	2217	502	107	0.794456	0.999662		Atf6_SOLEXA	9759
CG31670_SOLEXA_5	9669	879	200	15	0.818771	0.966063		NFAT_SOLEXA	5225	475	199	16	0.73655	0.877557		CG31670_SOLEXA_5	14894	1354	200	16	0.74066	0.792466		Mes2_SOLEXA	5511	11	198	0	1	1		Ct_SOLEXA	9759	2294	502	113	0.722091	0.289562		lola_PK_SOLEXA	9759	2217	504	114	0.539792	0.999662		CG10267_SOLEXA_5	9759
CG11723_SOLEXA	9669	879	199	15	0.81298	0.966063		eg_SOLEXA	5225	475	200	16	0.743759	0.877557		GATAd_SOLEXA	14894	1354	200	16	0.74066	0.792466		Met_SOLEXA_5	5511	11	198	0	1	1		Gsc_SOLEXA	9759	2294	503	113	0.730443	0.289562		lola_PL_SOLEXA_2.5	9759	2217	502	106	0.824625	0.999662		CG5669_SOLEXA_5	9759
CG14962_SOLEXA_5	9669	879	199	15	0.81298	0.966063		lola_PU_SOLEXA_5	5225	475	199	16	0.73655	0.877557		Hr39_SOLEXA	14894	1354	200	16	0.74066	0.792466		nub_SOLEXA	5511	11	200	0	1	1		Kr_SOLEXA_2.5	9759	2294	500	112	0.741567	0.289562		lola_PO_SOLEXA	9759	2217	503	120	0.281796	0.999662		Dif_Rel_SELEX	9759
cas_SELEX	9669	879	199	14	0.876381	0.986934		SuH_compiled	5225	475	199	15	0.815318	0.929491		ttk_PF_SOLEXA_5	14894	1354	201	16	0.747691	0.795778		onecut_SOLEXA	5511	11	201	0	1	1		Med_FlyReg	9759	2294	500	112	0.741567	0.289562		lola_PQ_SOLEXA	9759	2217	500	105	0.840327	0.999662		HLH4C_da_SOLEXA_5	9759
peb_F1_3_SOLEXA_2.5	9669	879	198	14	0.87192	0.986934		disco_SOLEXA_5	5225	475	200	15	0.82112	0.929491		CG5180_SOLEXA	14894	1354	200	15	0.817813	0.843765		ovo_SOLEXA_5	5511	11	200	0	1	1		Mes2_SOLEXA	9759	2294	500	112	0.741567	0.289562		lola_PW_SOLEXA	9759	2217	502	98	0.966472	0.999662		Hsf_compiled	9759
tgo_ss_SOLEXA_5	9669	879	198	14	0.87192	0.986934		Sox14_SOLEXA	5225	475	200	15	0.82112	0.929491		cnc_maf_s_SELEX	14894	1354	200	15	0.817813	0.843765		pad_SOLEXA_5	5511	11	201	0	1	1		lola_PC_SOLEXA_5	9759	2294	500	112	0.741567	0.289562		lola_PY_SOLEXA_5	9759	2217	500	109	0.709256	0.999662		Parx_da_SOLEXA_5	9759
ttk_PF_SOLEXA_5	9669	879	200	14	0.880717	0.986934		Hr83_SOLEXA	5225	475	199	15	0.815318	0.929491		Hr78_SOLEXA	14894	1354	200	15	0.817813	0.843765		peb_F1_3_SOLEXA_2.5	5511	11	201	0	1	1		AbdB_SOLEXA	9759	2294	501	112	0.749618	0.289688		mef2_compiled	9759	2217	501	108	0.753817	0.999662		br_PE_SOLEXA_5	9759
ftz_f1_SOLEXA_2	9669	879	199	14	0.876381	0.986934		Six4_SOLEXA_2	5225	475	199	15	0.815318	0.929491		C15_SOLEXA	14894	1354	200	15	0.817813	0.843765		pfk_SOLEXA	5511	11	199	0	1	1		Mad_FlyReg	9759	2294	501	112	0.749618	0.289688		nau_SOLEXA_5	9759	2217	502	110	0.687906	0.999662		cas_SELEX	9759
Hr51_SOLEXA	9669	879	199	14	0.876381	0.986934		CG31670_SOLEXA_5	5225	475	200	15	0.82112	0.929491		br_PE_SOLEXA_5	14894	1354	200	15	0.817813	0.843765		pho_SOLEXA_5	5511	11	202	0	1	1		Achi_SOLEXA	9759	2294	500	111	0.775716	0.293565		onecut_SOLEXA	9759	2217	500	113	0.543915	0.999662		chinmo_SOLEXA_15	9759
onecut_SOLEXA	9669	879	200	14	0.880717	0.986934		ftz_f1_SOLEXA_2	5225	475	200	15	0.82112	0.929491		ftz_f1_SOLEXA_2	14894	1354	200	15	0.817813	0.843765		Poxm_SOLEXA	5511	11	201	0	1	1		CG11071_SOLEXA_5	9759	2294	501	111	0.783144	0.293565		opa_SOLEXA_5	9759	2217	502	102	0.916235	0.999662		dsx_SELEX	9759
Stat92E_SELEX	9669	879	200	14	0.880717	0.986934		Hmx_SOLEXA	5225	475	199	15	0.815318	0.929491		apt_SELEX	14894	1354	201	15	0.823468	0.845287		pros_SELEX	5511	11	199	0	1	1		CG14962_SOLEXA_5	9759	2294	500	111	0.775716	0.293565		pad_SOLEXA_5	9759	2217	500	108	0.746016	0.999662		fkh_NAR	9759
Ind_Cell	9669	879	199	14	0.876381	0.986934		retn_SOLEXA	5225	475	201	15	0.826788	0.93118		acj6_SOLEXA	14894	1354	201	14	0.884043	0.876328		Rel_SANGER	5511	11	199	0	1	1		CG6276_SOLEXA	9759	2294	501	111	0.783144	0.293565		peb_F1_3_SOLEXA_2.5	9759	2217	503	97	0.975501	0.999662		sug_SOLEXA_5	9759
CG32830_SOLEXA_5	9669	879	200	14	0.880717	0.986934		Blimp_1_SOLEXA_5	5225	475	200	14	0.882899	0.96513		Dip3_SOLEXA	14894	1354	200	14	0.879824	0.876328		retn_SOLEXA	5511	11	199	0	1	1		Xrp1_CG6272_SOLEXA	9759	2294	503	112	0.765281	0.293565		peb_F5_7_SOLEXA_2.5	9759	2217	501	118	0.340587	0.999662		z_FlyReg	9759
Xrp1_CG6272_SOLEXA	9669	879	202	13	0.932485	0.991643		ac_da_SOLEXA_5	5225	475	199	14	0.878575	0.96513		CG11723_SOLEXA	14894	1354	200	14	0.879824	0.876328		rib_SOLEXA	5511	11	202	0	1	1		fkh_NAR	9759	2294	504	112	0.772888	0.293565		pros_SELEX	9759	2217	501	105	0.846179	0.999662		CG8765_SOLEXA	9759
Ets21C_SOLEXA	9669	879	200	12	0.958409	0.991643		esg_F3_5_SOLEXA	5225	475	198	14	0.874125	0.96513		CG14962_SOLEXA_5	14894	1354	200	14	0.879824	0.876328		run_Bgb_NBT	5511	11	199	0	1	1		CG17181_SOLEXA_5	9759	2294	502	111	0.790417	0.294541		retn_SOLEXA	9759	2217	500	117	0.371787	0.999662		CG3919_SOLEXA	9759
slbo_SOLEXA	9669	879	200	13	0.926794	0.991643		lola_PA_SOLEXA_5	5225	475	197	14	0.869547	0.96513		lola_PA_SOLEXA_5	14894	1354	200	14	0.879824	0.876328		salr_F3_5_SOLEXA_2.5	5511	11	200	0	1	1		D19B_SOLEXA_5	9759	2294	503	111	0.797535	0.294541		rib_SOLEXA	9759	2217	507	115	0.525881	0.999662		CG17181_SOLEXA_5	9759
chinmo_SOLEXA_15	9669	879	199	13	0.923799	0.991643		shn_F1_2_SOLEXA_2.5	5225	475	200	14	0.882899	0.96513		Hsf_compiled	14894	1354	201	14	0.884043	0.876328		sd_FlyReg	5511	11	200	0	1	1		byn_FlyReg	9759	2294	507	112	0.794795	0.294541		run_Bgb_NBT	9759	2217	502	113	0.563522	0.999662		CG32830_SOLEXA_5	9759
usp_SOLEXA	9669	879	200	12	0.958409	0.991643		BH1_SOLEXA	5225	475	198	14	0.874125	0.96513		shn_F1_2_SOLEXA_2.5	14894	1354	201	14	0.884043	0.876328		sens_SOLEXA_5	5511	11	197	0	1	1		Six4_SOLEXA_2	9759	2294	500	110	0.807206	0.296652		sage_da_SOLEXA_5	9759	2217	500	100	0.940269	0.999662		CG7056_SOLEXA	9759
dys_tgo_SOLEXA_5	9669	879	200	11	0.978302	0.991643		CG4404_SOLEXA	5225	475	200	13	0.92859	0.998343		CG15696_SOLEXA	14894	1354	201	13	0.92896	0.890304		shn_F1_2_SOLEXA_2.5	5511	11	200	0	1	1		tj_SOLEXA	9759	2294	501	110	0.813976	0.29768		salr_F3_5_SOLEXA_2.5	9759	2217	503	117	0.400476	0.999662		CrebA_SOLEXA	9759
CG3838_SOLEXA	9669	879	200	12	0.958409	0.991643		Ct_SOLEXA	5225	475	199	9	0.995604	0.998343		lola_PC_SOLEXA_5	14894	1354	200	13	0.926055	0.890304		Six4_SOLEXA_2	5511	11	200	0	1	1		lola_PA_SOLEXA_5	9759	2294	502	110	0.820587	0.298641		sens_SOLEXA_5	9759	2217	501	112	0.596756	0.999662		HLH4C_SOLEXA_5	9759
GATAd_SOLEXA	9669	879	199	12	0.956512	0.991643		CG15696_SOLEXA	5225	475	200	12	0.959728	0.998343		Lbe_SOLEXA	14894	1354	200	13	0.926055	0.890304		slbo_SOLEXA	5511	11	200	0	1	1		Blimp_1_SOLEXA_5	9759	2294	500	109	0.835892	0.301286		shn_F1_2_SOLEXA_2.5	9759	2217	500	89	0.997565	0.999662		HLH54F_da_SOLEXA_5	9759
Hr39_SOLEXA	9669	879	199	13	0.923799	0.991643		salr_F3_5_SOLEXA_2.5	5225	475	199	12	0.95786	0.998343		Hr51_SOLEXA	14894	1354	200	13	0.926055	0.890304		sob_F3_5_SOLEXA_5	5511	11	200	0	1	1		CG11504_SOLEXA	9759	2294	504	110	0.833332	0.301286		slbo_SOLEXA	9759	2217	500	118	0.331434	0.999662		Hr46_SOLEXA	9759
lola_PA_SOLEXA_5	9669	879	199	11	0.977208	0.991643		Lim3_SOLEXA	5225	475	203	12	0.964902	0.998343		onecut_SOLEXA	14894	1354	201	13	0.92896	0.890304		Sox14_SOLEXA	5511	11	200	0	1	1		Lag1_SOLEXA	9759	2294	506	110	0.845445	0.303271		sob_F3_5_SOLEXA_5	9759	2217	501	99	0.954878	0.999662		Hr83_SOLEXA	9759
Hsf_compiled	9669	879	200	12	0.958409	0.991643		br_PC_SOLEXA_10	5225	475	200	11	0.979166	0.998343		CG6276_SOLEXA	14894	1354	201	13	0.92896	0.890304		Sox15_SOLEXA	5511	11	200	0	1	1		D19A_F10_12_SANGER_5	9759	2294	503	109	0.853699	0.304774		sr_SOLEXA_5	9759	2217	501	87	0.998935	0.999662		Rel_SANGER	9759
shn_F1_2_SOLEXA_2.5	9669	879	197	12	0.952489	0.991643		acj6_SOLEXA	5225	475	200	11	0.979166	0.998343		rib_SOLEXA	14894	1354	200	13	0.926055	0.890304		Stat92E_SELEX	5511	11	200	0	1	1		Crc_CG6272_SOLEXA	9759	2294	500	108	0.861704	0.306174		sug_SOLEXA_5	9759	2217	502	102	0.916235	0.999662		ab_SOLEXA_5	9759
CG6276_SOLEXA	9669	879	199	11	0.977208	0.991643		Dip3_SOLEXA	5225	475	199	8	0.998343	0.998343		Stat92E_SELEX	14894	1354	200	12	0.957864	0.898473		tai_Met_SOLEXA_5	5511	11	201	0	1	1		vvl_SOLEXA	9759	2294	502	108	0.872386	0.308507		tai_Met_SOLEXA_5	9759	2217	503	99	0.959255	0.999662		byn_FlyReg	9759
rib_SOLEXA	9669	879	200	13	0.926794	0.991643		apt_SELEX	5225	475	200	12	0.959728	0.998343		Ind_Cell	14894	1354	200	12	0.957864	0.898473		tai_SOLEXA_5	5511	11	199	0	1	1		CG10267_F1_3_SOLEXA_5	9759	2294	504	108	0.882453	0.310602		tai_SOLEXA_5	9759	2217	501	97	0.972623	0.999662		lola_PC_SOLEXA_5	9759
Sox15_SOLEXA	9669	879	200	13	0.926794	0.991643		CG5953_SOLEXA	5225	475	200	13	0.92859	0.998343		CG32830_SOLEXA_5	14894	1354	200	12	0.957864	0.898473		tgo_ss_SOLEXA_5	5511	11	198	0	1	1		CG31670_SOLEXA_5	9759	2294	500	106	0.904782	0.315394		tap_da_SOLEXA_5	9759	2217	502	106	0.824625	0.999662		lola_PG_SOLEXA_	9759
pfk_SOLEXA	9669	879	200	12	0.958409	0.991643		CG14962_SOLEXA_5	5225	475	199	11	0.978097	0.998343		Sox15_SOLEXA	14894	1354	201	12	0.959699	0.898473		tj_SOLEXA	5511	11	200	0	1	1		bowl_SOLEXA_5	9759	2294	502	106	0.912896	0.315394		tgo_sima_SOLEXA_5	9759	2217	503	106	0.830843	0.999662		run_Bgb_NBT	9759
Hmx_SOLEXA	9669	879	199	13	0.923799	0.991643		onecut_SOLEXA	5225	475	199	11	0.978097	0.998343		retn_SOLEXA	14894	1354	200	12	0.957864	0.898473		Tkr_SOLEXA	5511	11	198	0	1	1		lola_PP_SOLEXA_2.5	9759	2294	500	106	0.904782	0.315394		tgo_ss_SOLEXA_5	9759	2217	500	111	0.629417	0.999662		shn_F1_2_SOLEXA_2.5	9759
BH1_SOLEXA	9669	879	200	11	0.978302	0.991643		CG3838_SOLEXA	5225	475	199	13	0.925621	0.998343		pfk_SOLEXA	14894	1354	200	8	0.998281	0.905442		tll_SOLEXA	5511	11	200	0	1	1		run_Bgb_NBT	9759	2294	502	106	0.912896	0.315394		tj_SOLEXA	9759	2217	501	121	0.23087	0.999662		ttk_PF_SOLEXA_5	9759
Gsc_SOLEXA	9669	879	200	11	0.978302	0.991643		rib_SOLEXA	5225	475	198	11	0.976978	0.998343		Hmx_SOLEXA	14894	1354	200	11	0.977943	0.905442		ttk_PF_SOLEXA_5	5511	11	202	0	1	1		foxo_SOLEXA	9759	2294	500	104	0.937179	0.322299		tll_SOLEXA	9759	2217	500	100	0.940269	0.999662		Gsc_SOLEXA	9759
CG15601_SOLEXA	9669	879	199	12	0.956512	0.991643		Sox15_SOLEXA	5225	475	201	10	0.990728	0.998343		BH1_SOLEXA	14894	1354	202	8	0.998485	0.905442		usp_SOLEXA	5511	11	199	0	1	1		brk_FlyReg	9759	2294	503	104	0.945798	0.322306		toy_SOLEXA	9759	2217	502	115	0.476471	0.999662		esg_F3_5_SOLEXA	9759
CG7056_SOLEXA	9669	879	200	13	0.926794	0.991643		Gsc_SOLEXA	5225	475	201	11	0.980187	0.998343		Gsc_SOLEXA	14894	1354	201	9	0.995747	0.905442		vfl_SOLEXA_5	5511	11	200	0	1	1		chinmo_SOLEXA_15	9759	2294	506	105	0.94157	0.322306		trem_SELEX	9759	2217	501	104	0.871157	0.999662		CG31670_SOLEXA_5	9759
Eip74EF_SOLEXA	9669	879	201	10	0.990243	0.994704		CG15601_SOLEXA	5225	475	199	11	0.978097	0.998343		CG15601_SOLEXA	14894	1354	200	11	0.977943	0.905442		vvl_SOLEXA	5511	11	200	0	1	1		Cf2_PB_SOLEXA_5	9759	2294	505	104	0.950987	0.322608		ttk_PF_SOLEXA_5	9759	2217	500	101	0.92567	0.999662		Kr_SOLEXA_2.5	9759
retn_SOLEXA	9669	879	199	10	0.989131	0.994704		CG7056_SOLEXA	5225	475	200	9	0.995859	0.998343		CG7056_SOLEXA	14894	1354	200	8	0.998281	0.905442		Xrp1_CG6272_SOLEXA	5511	11	196	0	1	1		pho_SOLEXA_5	9759	2294	500	100	0.976088	0.329631		usp_SOLEXA	9759	2217	500	119	0.293019	0.999662		apt_SELEX	9759
CG11504_SOLEXA	9669	879	200	9	0.995601	0.995601		CG11504_SOLEXA	5225	475	198	8	0.998233	0.998343		CG11504_SOLEXA	14894	1354	202	10	0.990562	0.905442		z_FlyReg	5511	11	197	0	1	1		apt_SELEX	9759	2294	500	95	0.994521	0.33435		z_FlyReg	9759	2217	500	109	0.709256	0.999662		bowl_SOLEXA_5	9759
[truncated: 47 more columns]
