# Supplementary material for: Individual differences in honey bee behavior enabled by plasticity in brain gene regulatory networks
Source: bioRxiv preprint, doi:10.1101/2020.09.09.289272, version 2 (2020-12-12)
Supplement: Supplemental File 8 [file 289272_file10.xlsx]

## Sheet: Sheet1
Gene Regulatory Network			TFs predictive of individual behavior			TF modules associated with specific behaviors
TFs	Targets		Top predictor TFs	Importance score ( from Random forests)		TF module	TF name	Individual property	Overlap p-value (hypegeometric test)
gene9856	gene2		usp	0.349846		gene10032	cwo	eggs	0
gene7405	gene3		CG18619	0.309201		gene10032	cwo	ovary_score	0
gene10724	gene3		Deaf1	0.27688		gene10032	cwo	p.both	3.1811e-05
gene10323	gene5		emc	0.254687		gene10032	cwo	p.nectar	3.9956e-08
gene943	gene6		Xbp1	0.252191		gene10032	cwo	p.pollen	4.4409e-16
gene4069	gene15		dmrt93B	0.234277		gene10032	cwo	rank_foraging	0
gene4584	gene15		opa	0.225949		gene10032	cwo	rank_laying	0
gene1156	gene15		Pep	0.208126		gene10032	cwo	spl_score_wgt	0
gene10187	gene27		trx	0.203641		gene10032	cwo	trips	0
gene5166	gene27		cwo	0.201835		gene10187	br	eggs	0.0093597
gene1488	gene28		Kr-h1	0.200737		gene10187	br	p.both	0.00062031
gene3289	gene31		Med	0.197619		gene10247	SoxN	p.nectar	0.00011077
gene831	gene37		CG11966	0.196967		gene10247	SoxN	rank_foraging	1.6653e-15
gene6905	gene37		bab1	0.192946		gene10247	SoxN	rank_laying	7.6527e-06
gene7405	gene38		CG1620	0.187064		gene10247	SoxN	spl_score_wgt	1.6381e-10
gene10032	gene38		Ada2b	0.18424		gene10247	SoxN	trips	0.00058558
gene10427	gene38		Usf	0.181409		gene10264	CG8216	eggs	0
gene3473	gene38		Blimp-1	0.176157		gene10264	CG8216	ovary_score	0
gene5652	gene41		sd	0.168622		gene10264	CG8216	p.nectar	1.1324e-14
gene1363	gene41		MESR4	0.165739		gene10264	CG8216	p.pollen	1.3037e-11
gene1610	gene41		CG10979	0.160141		gene10264	CG8216	rank_foraging	1.1102e-16
gene4584	gene76		Hr51	0.159321		gene10264	CG8216	rank_laying	3.3307e-16
gene7405	gene76		Kdm2	0.153105		gene10264	CG8216	spl_score_wgt	7.7716e-16
gene1156	gene76		CG17181	0.149748		gene10264	CG8216	trips	2.9976e-15
gene4584	gene79		CG17829	0.147113		gene10323	erm	p.nectar	5.811e-05
gene8153	gene79		CG11414	0.145097		gene10323	erm	rank_foraging	3.4942e-05
gene6696	gene79		stc	0.142771		gene10323	erm	spl_score_wgt	0.00070687
gene1064	gene86		Pcl	0.142606		gene10375	Dll	p.nectar	0.0054284
gene1724	gene86		CG11247	0.142596		gene10375	Dll	rank_foraging	2.0119e-05
gene11206	gene86		CG1832	0.142302		gene10375	Dll	rank_laying	0.0031145
gene5214	gene93		Dll	0.141748		gene10375	Dll	spl_score_wgt	0.0011616
gene7806	gene93		foxo	0.141747		gene10375	Dll	trips	0.0081618
gene3169	gene98		ush	0.141493		gene10427	h	rank_foraging	0
gene749	gene98		CG32121	0.141074		gene10427	h	rank_laying	0
gene8210	gene102		E(spl)mgamma-HLH	0.14049		gene10427	h	spl_score_wgt	0
gene9055	gene103		toy	0.140028		gene10475	Mtp	eggs	1.0695e-08
gene10247	gene103		Eip78C	0.139638		gene10475	Mtp	ovary_score	3.1786e-05
gene5166	gene105		Hsf	0.139605		gene10475	Mtp	p.both	4.2683e-05
gene10089	gene105		CG9727	0.138196		gene10475	Mtp	p.nectar	0
gene8038	gene105		MBD-like	0.136901		gene10475	Mtp	rank_foraging	0
gene11790	gene109		Kr	0.135255		gene10475	Mtp	rank_laying	0
gene10264	gene109		p53	0.13316		gene10475	Mtp	spl_score_wgt	0
gene5319	gene129		CG15011	0.128561		gene10475	Mtp	trips	0
gene11258	gene129		lmd	0.122662		gene10613	E(spl)mgamma-HLH	eggs	2.9e-07
gene11570	gene129		sbb	0.121236		gene10613	E(spl)mgamma-HLH	ovary_score	2.677e-06
gene8124	gene131		fd59A	0.118335		gene10613	E(spl)mgamma-HLH	p.both	0.00020506
gene7405	gene131		CG32105	0.113243		gene10613	E(spl)mgamma-HLH	p.nectar	2.1568e-06
gene11570	gene132		vri	0.110579		gene10613	E(spl)mgamma-HLH	p.pollen	2.0771e-07
gene5374	gene132		CG12075	0.104135		gene10613	E(spl)mgamma-HLH	rank_foraging	1.9223e-10
gene3770	gene132		ktub	0.102869		gene10613	E(spl)mgamma-HLH	rank_laying	2.5304e-11
gene2122	gene132		Mef2	0.100504		gene10613	E(spl)mgamma-HLH	spl_score_wgt	5.1664e-11
gene4584	gene140		bigmax	0.100504		gene10613	E(spl)mgamma-HLH	trips	5.8942e-10
gene10475	gene142		CG11294	0.100504		gene1064	Hr51	eggs	1.1102e-16
gene5227	gene142		CG17912	0.100504		gene1064	Hr51	ovary_score	0
gene5150	gene143		br	0.100504		gene1064	Hr51	p.both	0
gene6073	gene143		al	0.100504		gene1064	Hr51	p.nectar	0
gene6659	gene149		CG8216	0.100504		gene1064	Hr51	p.pollen	0
gene1488	gene151		Hr46	0.100504		gene1064	Hr51	rank_foraging	0
gene11063	gene151		MBD-R2	0.100504		gene1064	Hr51	rank_laying	0
gene12202	gene151		Pdp1	0.100504		gene1064	Hr51	spl_score_wgt	0
gene9107	gene151		CG11456	0.100504		gene1064	Hr51	trips	0
gene8159	gene155		Mio	0.100504		gene10724	Pdp1	ovary_score	0.003095
gene10977	gene155		Camta	0.100504		gene10724	Pdp1	p.nectar	2.4952e-07
gene5183	gene155		acj6	0.100504		gene10724	Pdp1	p.pollen	0.00010048
gene943	gene157		Mrtf	0.100504		gene10724	Pdp1	rank_foraging	1.8697e-12
gene7729	gene166		ovo	0.100504		gene10724	Pdp1	rank_laying	5.6092e-12
gene3289	gene166		kn	0.100504		gene10724	Pdp1	spl_score_wgt	3.8902e-13
gene6659	gene166		adp	0.100504		gene10724	Pdp1	trips	9.6568e-09
gene6659	gene167		mip120	0.100504		gene11035	CG9418	p.both	0.0058783
gene2175	gene167		dys	0.100504		gene11035	CG9418	rank_foraging	5.5274e-06
gene1064	gene170		fd102C	0.100504		gene11035	CG9418	rank_laying	1.7633e-06
gene8124	gene171		CG9890	0.100504		gene11035	CG9418	spl_score_wgt	2.6368e-06
gene2174	gene173		CG9650	0.100504		gene11035	CG9418	trips	4.8923e-06
gene8124	gene173		CG7099	0.100504		gene11131	Deaf1	ovary_score	0.0043188
gene10264	gene173		ewg	0.100504		gene11131	Deaf1	p.both	0.0024002
gene7405	gene193		Fer1	0.100504		gene11131	Deaf1	p.nectar	0.00015537
gene11063	gene203		CG6765	0.100504		gene11131	Deaf1	rank_foraging	3.1248e-08
gene5652	gene203		onecut	0.100504		gene11131	Deaf1	rank_laying	2.9467e-08
gene8124	gene210		bsh	0.100504		gene11131	Deaf1	spl_score_wgt	4.2346e-07
gene2125	gene211		zfh1	0.100504		gene11131	Deaf1	trips	7.4082e-10
gene10977	gene211		tup	0.100504		gene11206	CG1832	eggs	4.0826e-10
gene3289	gene211		Myb	0.100504		gene11206	CG1832	ovary_score	3.0027e-11
gene8649	gene211		kin17	0.100504		gene11206	CG1832	p.both	3.0864e-13
gene10375	gene212		CG13287	0.100504		gene11206	CG1832	p.nectar	7.2137e-07
gene5166	gene214		CTCF	0.100504		gene11206	CG1832	p.pollen	0.0038765
gene8210	gene214		h	0.100504		gene11206	CG1832	rank_foraging	2.4647e-14
gene10089	gene218		peb	0.100504		gene11206	CG1832	rank_laying	1.884e-13
gene4041	gene218		dsx	0.100504		gene11206	CG1832	spl_score_wgt	4.341e-14
gene1282	gene225		gem	0.100504		gene11206	CG1832	trips	1.4466e-13
gene7405	gene225		cas	0.100504		gene11230	CG7786	p.both	0.00064901
gene861	gene225		chn	0.100504		gene11230	CG7786	p.pollen	1.2665e-06
gene11942	gene225		Pph13	0.100504		gene11230	CG7786	rank_foraging	7.9622e-05
gene10475	gene227		CG9418	0.100504		gene11230	CG7786	rank_laying	0.00029374
gene1282	gene228		CG6769	0.100504		gene11230	CG7786	spl_score_wgt	4.1427e-05
gene7405	gene228		Mtp	0.100504		gene11230	CG7786	trips	0.00053515
gene2174	gene237		CG7786	0.100504		gene11267	repo	eggs	1.2287e-08
gene8124	gene237		CrebA	0.100504		gene11267	repo	p.both	4.7223e-05
gene7405	gene237		Gug	0.100504		gene11267	repo	p.nectar	1.816e-06
gene15	gene238		jumu	0.100504		gene11267	repo	rank_foraging	0
gene4818	gene238		Scm	0.100504		gene11267	repo	rank_laying	3.721e-09
gene8210	gene238		ash2	0.100504		gene11267	repo	spl_score_wgt	6.614e-09
gene8153	gene238		da	0.100504		gene11267	repo	trips	6.1667e-09
gene9023	gene247		Optix	0.100504		gene11421	p53	ovary_score	0.0024696
gene8210	gene249		Atf6	0.100504		gene11421	p53	p.nectar	7.4357e-08
gene5166	gene249		MTF-1	0.100504		gene11421	p53	rank_foraging	2.1346e-05
gene15	gene251		NfI	0.100504		gene11421	p53	rank_laying	8.8265e-06
gene8124	gene251		lid	0.100504		gene11421	p53	spl_score_wgt	1.2042e-05
gene2174	gene251		d4	0.100504		gene11421	p53	trips	1.8924e-06
gene8210	gene251		l(2)k10201	0.100504		gene1156	al	eggs	3.4896e-07
gene2174	gene269		dom	0.100504		gene1156	al	ovary_score	0.00014327
gene8124	gene269		ftz-f1	0.100504		gene1156	al	p.both	1.1523e-05
gene9055	gene279		CG8924	0.100504		gene1156	al	p.nectar	0.00058386
gene2174	gene279		pb	0.100504		gene1156	al	p.pollen	0.00061118
gene38	gene283		Ptx1	0.100504		gene1156	al	rank_foraging	3.0531e-14
gene6696	gene283		B-H1	0.100504		gene1156	al	rank_laying	2.3315e-15
gene10264	gene283		otp	0.100504		gene1156	al	spl_score_wgt	5.7732e-15
gene11342	gene293		CG3815	0.100504		gene1156	al	trips	8.0962e-10
gene9107	gene293		CG3407	0.100504		gene11570	sr	p.both	0.00021367
gene11485	gene304		cbt	0.100504		gene11604	Med	p.nectar	0.0018597
gene4041	gene304		dve	0.100504		gene11604	Med	rank_foraging	2.6153e-09
gene4587	gene306		Trl	0.100504		gene11604	Med	rank_laying	3.0471e-09
gene9177	gene306		bi	0.0913398		gene11604	Med	spl_score_wgt	6.4832e-09
gene6073	gene311		yemalpha	0.0889526		gene11604	Med	trips	4.7109e-07
gene7405	gene311		repo	0.08435		gene11897	CG8924	p.nectar	1.8518e-05
gene11485	gene317		exd	0.0801173		gene11897	CG8924	rank_foraging	0.00027338
gene3923	gene317		CG33695	0.0766558		gene11897	CG8924	rank_laying	0.0065827
gene4584	gene318		Ets65A	0.0729541		gene11897	CG8924	spl_score_wgt	0.0025423
gene11230	gene318		Rbf	0.0704672		gene11897	CG8924	trips	0.0053665
gene10032	gene318		pho	0.0591466		gene11942	stc	eggs	3.0276e-12
gene11063	gene323		Su(var)2-10	0.0547916		gene11942	stc	ovary_score	0
gene11035	gene324		crm	0.0508329		gene11942	stc	p.both	1.1491e-13
gene861	gene327		Nf-YA	0.0431419		gene11942	stc	p.pollen	0
gene5713	gene329		unpg	0.0357776		gene11942	stc	rank_foraging	1.894e-13
gene283	gene329		abo	0.0282808		gene11942	stc	rank_laying	0
gene1282	gene331		sim	0.0263399		gene11942	stc	spl_score_wgt	2.1205e-14
gene11696	gene331		Bgb	0.0244629		gene11942	stc	trips	3.5527e-15
gene4122	gene339		aop	0.020004		gene12252	Lim3	rank_foraging	5.9721e-08
gene5687	gene339		Opbp	0.0169932		gene12252	Lim3	rank_laying	1.2862e-08
gene2798	gene339		CG12071	0.00824298		gene12252	Lim3	spl_score_wgt	2.2084e-08
gene4069	gene343		Dp	0.00743315		gene1282	sim	p.nectar	1.3911e-13
gene11131	gene343		shn	0		gene1282	sim	p.pollen	0.0097068
gene943	gene343		CG32532	0		gene1282	sim	rank_foraging	5.9052e-10
gene15	gene356		exex	0		gene1282	sim	rank_laying	2.146e-08
gene3473	gene356		Dr	0		gene1282	sim	spl_score_wgt	1.1986e-08
gene8256	gene356		Sp1	0		gene1282	sim	trips	8.96e-10
gene7762	gene357		SoxN	0		gene15	Pep	eggs	0
gene8834	gene357		blos1	0		gene15	Pep	ovary_score	0
gene1998	gene357		erm	0		gene15	Pep	p.both	0
gene11267	gene370		dpn	0		gene15	Pep	p.nectar	0
gene1156	gene381		byn	0		gene15	Pep	p.pollen	0
gene5652	gene381		en	0		gene15	Pep	rank_foraging	0
gene4041	gene381		maf-S	0		gene15	Pep	rank_laying	0
gene4584	gene389		GATAd	0		gene15	Pep	spl_score_wgt	0
gene15	gene389		lz	0		gene15	Pep	trips	0
gene1064	gene390		da	0		gene1610	schlank	p.nectar	0.00050923
gene8153	gene390		ash1	0		gene1610	schlank	spl_score_wgt	0.0066242
gene7405	gene390		apt	0		gene1610	schlank	trips	0.0016259
gene15	gene391		ems	0		gene1724	trx	eggs	3.6212e-12
gene4584	gene391		Hr96	0		gene1724	trx	ovary_score	1.1102e-16
gene610	gene393		slou	0		gene1724	trx	p.both	7.1054e-15
gene10475	gene393		CG11984	0		gene1724	trx	p.nectar	0
gene11485	gene396		Smox	0		gene1724	trx	p.pollen	7.7792e-09
gene9839	gene396		sr	0		gene1724	trx	rank_foraging	0
gene8124	gene409		Stat92E	0		gene1724	trx	rank_laying	0
gene6696	gene409		oc	0		gene1724	trx	spl_score_wgt	0
gene9055	gene418		Tusp	0		gene1724	trx	trips	0
gene7405	gene426		Antp	0		gene1824	Nf-YA	eggs	1.4162e-06
gene11107	gene428		Scr	0		gene1824	Nf-YA	ovary_score	9.7964e-05
gene3920	gene428		Dfd	0		gene1824	Nf-YA	p.both	7.0891e-07
gene2853	gene428		lab	0		gene1824	Nf-YA	rank_foraging	1.951e-06
gene1998	gene428		Lim3	0		gene1824	Nf-YA	rank_laying	6.6273e-07
gene1064	gene429		fd68A	0		gene1824	Nf-YA	spl_score_wgt	9.6887e-07
gene5687	gene429		hbn	0		gene1824	Nf-YA	trips	6.5365e-05
gene4584	gene434		Rx	0		gene2055	Optix	p.nectar	1.2212e-15
gene15	gene434		CG31224	0		gene2055	Optix	rank_foraging	1.4812e-09
gene5652	gene436		ecd	0		gene2055	Optix	rank_laying	3.825e-06
gene4041	gene436		schlank	0		gene2055	Optix	spl_score_wgt	2.2084e-08
gene2174	gene437		Ets98B	0		gene2055	Optix	trips	0.0003022
gene11206	gene445		Lim1	0		gene2122	Kdm2	eggs	0.00024981
gene4584	gene445		lilli	0		gene2122	Kdm2	ovary_score	0.00022004
gene11258	gene446		retn	0		gene2122	Kdm2	p.both	0.0018799
gene3923	gene446		woc	0		gene2122	Kdm2	p.pollen	2.1592e-09
gene8124	gene446		CG11085	0		gene2122	Kdm2	rank_foraging	2.0119e-05
gene7729	gene447		sug	0		gene2122	Kdm2	rank_laying	5.7475e-07
gene4328	gene447		Awh	0		gene2122	Kdm2	spl_score_wgt	1.0067e-06
gene4313	gene447		Eip74EF	0		gene2122	Kdm2	trips	0.002317
gene5227	gene450		Nf-YC	0		gene2174	CG18619	eggs	0
gene3923	gene450		ttk	0		gene2174	CG18619	ovary_score	0
gene8850	gene452		pita	0		gene2174	CG18619	p.both	2.8381e-12
gene5652	gene452		ci	0		gene2174	CG18619	p.nectar	0
gene9400	gene457		nub	0		gene2174	CG18619	p.pollen	1.9119e-07
gene11790	gene457		Dref	0		gene2174	CG18619	rank_foraging	0
gene2122	gene457		klu	0		gene2174	CG18619	rank_laying	0
gene3747	gene457		dl	0		gene2174	CG18619	spl_score_wgt	0
gene4818	gene463		Mad	0		gene2174	CG18619	trips	0
gene8210	gene464		dac	0		gene2175	yemalpha	eggs	0.00041803
gene5573	gene464		Pbp95	0		gene2175	yemalpha	p.both	0
gene7696	gene464		Ssb-c31a	0		gene2175	yemalpha	p.nectar	0.003466
gene3473	gene469		CG16779	0		gene2175	yemalpha	p.pollen	0.0056313
gene5573	gene469		grh	0		gene2175	yemalpha	spl_score_wgt	0.0080913
gene10089	gene474		CG14655	0		gene2175	yemalpha	trips	0.00014833
gene6564	gene474		hth	0		gene2557	exd	eggs	7.7716e-16
gene12237	gene474		su(Hw)	0		gene2557	exd	ovary_score	9.0039e-13
gene542	gene474		MTA1-like	0		gene2557	exd	p.both	2.2451e-08
gene15	gene486		cg	0		gene2557	exd	p.nectar	0
gene10032	gene487		sima	0		gene2557	exd	p.pollen	1.2816e-10
gene8415	gene487		CG7987	0		gene2557	exd	rank_foraging	0
gene10724	gene491		CG13624	0		gene2557	exd	rank_laying	0
gene7405	gene491		Dsp1	0		gene2557	exd	spl_score_wgt	0
gene8210	gene505		Gsc	0		gene2557	exd	trips	0
gene2174	gene505		bon	0		gene2798	Mio	p.pollen	0.00017755
gene8906	gene505		Sox102F	0		gene283	sd	eggs	4.3299e-15
gene4584	gene507		crp	0		gene283	sd	ovary_score	0
gene10089	gene509		Hand	0		gene283	sd	p.both	5.7932e-07
gene5227	gene509		disco	0		gene283	sd	p.nectar	6.2584e-06
gene3289	gene542		tj	0		gene283	sd	p.pollen	0
gene10032	gene550		Hr39	0		gene283	sd	rank_foraging	0
gene8124	gene563		ct	0		gene283	sd	rank_laying	0
gene12252	gene563		gl	0		gene283	sd	spl_score_wgt	0
gene3473	gene566		Jarid2	0		gene283	sd	trips	1.1102e-16
gene11897	gene566		CG7368	0		gene3289	ci	eggs	5.5805e-09
gene2175	gene569		fd64A	0		gene3289	ci	ovary_score	0.00020486
gene8210	gene570		HGTX	0		gene3289	ci	p.both	7.1054e-15
gene542	gene570		bab1	0		gene3289	ci	p.nectar	1.9305e-06
gene7729	gene572		Br140	0		gene3289	ci	rank_foraging	3.5846e-07
gene5652	gene572		YL-1	0		gene3289	ci	rank_laying	1.9808e-08
gene5573	gene575		Fer2	0		gene3289	ci	spl_score_wgt	5.5659e-08
gene9839	gene575		ss	0		gene3289	ci	trips	4.8561e-13
gene542	gene577		CG31460	0		gene3473	Dref	eggs	0
gene2125	gene577		CG14711	0		gene3473	Dref	ovary_score	1.174e-10
gene10247	gene582		Ets97D	0		gene3473	Dref	p.both	8.1522e-07
gene8124	gene587		Rfx	0		gene3473	Dref	p.nectar	5.9645e-12
gene2174	gene587		PHDP	0		gene3473	Dref	rank_foraging	0
gene7405	gene588		Max	0		gene3473	Dref	rank_laying	0
gene10247	gene594		CG12769	0		gene3473	Dref	spl_score_wgt	0
gene11897	gene594		E2f	0		gene3473	Dref	trips	0
gene1156	gene605		H2.0	0		gene38	emc	eggs	0
gene8415	gene605		fkh	0		gene38	emc	ovary_score	0
gene7167	gene605		Atf3	0		gene38	emc	p.nectar	0
gene38	gene610		CG4374	0		gene38	emc	p.pollen	1.4489e-08
gene10247	gene610		jim	0		gene38	emc	rank_foraging	0
gene9055	gene610		pnt	0		gene38	emc	rank_laying	0
gene11131	gene616		CG13296	0		gene38	emc	spl_score_wgt	0
gene1156	gene617		MEP-1	0		gene38	emc	trips	0
gene6659	gene631		srp	0		gene4002	CG17829	eggs	5.4851e-05
gene10032	gene642		ken	0		gene4002	CG17829	ovary_score	6.5056e-08
gene4584	gene662		sc	0		gene4002	CG17829	p.both	1.4384e-05
gene1282	gene662		CG9305	0		gene4002	CG17829	rank_foraging	1.7267e-05
gene8210	gene665		cyc	0		gene4002	CG17829	rank_laying	1.0571e-08
gene11206	gene665		ara	0		gene4002	CG17829	spl_score_wgt	1.021e-06
gene10032	gene666		mirr	0		gene4002	CG17829	trips	0.0012507
gene15	gene666		crol	0		gene4069	Ada2b	eggs	1.4964e-11
gene7167	gene666		ap	0		gene4069	Ada2b	ovary_score	1.9359e-11
gene10264	gene666		Oli	0		gene4069	Ada2b	p.both	1.3897e-09
gene283	gene666		nau	0		gene4069	Ada2b	p.nectar	0.001139
gene5221	gene667		CG3838	0		gene4069	Ada2b	p.pollen	3.2586e-05
gene8038	gene667		CG15715	0		gene4069	Ada2b	rank_foraging	1.115e-12
gene15	gene676		CG9776	0		gene4069	Ada2b	rank_laying	7.2216e-12
gene8210	gene676					gene4069	Ada2b	spl_score_wgt	1.5265e-11
gene4069	gene683					gene4069	Ada2b	trips	6.5403e-12
gene4584	gene683					gene4122	Su(var)2-10	p.both	8.5721e-07
gene8124	gene686					gene4122	Su(var)2-10	trips	0.0078786
gene8906	gene686					gene4212	chn	eggs	0.0057404
gene15	gene689					gene4212	chn	p.both	3.1962e-08
gene4069	gene689					gene4584	Xbp1	eggs	0
gene7167	gene690					gene4584	Xbp1	ovary_score	0
gene8415	gene690					gene4584	Xbp1	p.both	0
gene11131	gene694					gene4584	Xbp1	p.nectar	0
gene5573	gene694					gene4584	Xbp1	p.pollen	0
gene15	gene729					gene4584	Xbp1	rank_foraging	0
gene11131	gene736					gene4584	Xbp1	rank_laying	0
gene610	gene739					gene4584	Xbp1	spl_score_wgt	0
gene8124	gene740					gene4584	Xbp1	trips	0
gene7167	gene740					gene4818	sbb	eggs	0
gene2174	gene740					gene4818	sbb	ovary_score	0
gene10724	gene740					gene4818	sbb	p.both	0
gene8124	gene742					gene4818	sbb	p.nectar	1.0055e-05
gene8153	gene742					gene4818	sbb	p.pollen	0
gene38	gene742					gene4818	sbb	rank_foraging	0
gene610	gene753					gene4818	sbb	rank_laying	0
gene1610	gene753					gene4818	sbb	spl_score_wgt	0
gene10475	gene764					gene4818	sbb	trips	0
gene1610	gene764					gene5087	CG9890	rank_foraging	0.0084172
gene3920	gene769					gene5150	MBD-like	rank_laying	0.0085028
gene38	gene769					gene5166	Eip78C	eggs	0
gene10475	gene778					gene5166	Eip78C	ovary_score	0
gene2125	gene778					gene5166	Eip78C	p.both	0
gene3923	gene780					gene5166	Eip78C	p.nectar	0.00041404
gene8124	gene784					gene5166	Eip78C	p.pollen	3.7445e-10
gene2174	gene784					gene5166	Eip78C	rank_foraging	0
gene10475	gene784					gene5166	Eip78C	rank_laying	4.1522e-14
gene15	gene786					gene5166	Eip78C	spl_score_wgt	5.3291e-15
gene8210	gene786					gene5166	Eip78C	trips	0
gene943	gene786					gene5214	bon	eggs	7.6974e-05
gene10475	gene786					gene5214	bon	ovary_score	0.0066997
gene11942	gene790					gene5214	bon	p.both	7.1288e-05
gene283	gene790					gene5214	bon	rank_foraging	3.1283e-11
gene3473	gene800					gene5214	bon	rank_laying	6.5283e-08
gene10323	gene808					gene5214	bon	spl_score_wgt	3.4553e-09
gene2055	gene808					gene5214	bon	trips	1.2197e-09
gene9055	gene808					gene5221	Kr	eggs	9.0558e-05
gene9023	gene808					gene5221	Kr	ovary_score	2.5224e-08
gene6402	gene823					gene5221	Kr	p.both	7.8608e-07
gene1064	gene823					gene5221	Kr	p.nectar	1.2824e-06
gene9107	gene829					gene5221	Kr	p.pollen	0.00045404
gene4818	gene829					gene5221	Kr	rank_foraging	1.6923e-10
gene15	gene833					gene5221	Kr	rank_laying	1.8985e-11
gene8153	gene833					gene5221	Kr	spl_score_wgt	8.1304e-10
gene8834	gene836					gene5221	Kr	trips	1.0657e-11
gene4636	gene836					gene542	Mrtf	p.pollen	0.0082607
gene8850	gene836					gene542	Mrtf	rank_foraging	0.00037033
gene5183	gene836					gene542	Mrtf	rank_laying	0.00027306
gene1047	gene838					gene542	Mrtf	spl_score_wgt	0.0001345
gene8124	gene838					gene542	Mrtf	trips	4.1541e-06
gene2055	gene838					gene5573	Kr-h1	eggs	1.9956e-09
gene15	gene841					gene5573	Kr-h1	ovary_score	1.0436e-14
gene15	gene842					gene5573	Kr-h1	p.both	0.0087874
gene9856	gene842					gene5573	Kr-h1	p.nectar	0
gene7405	gene848					gene5573	Kr-h1	p.pollen	2.2159e-09
gene943	gene861					gene5573	Kr-h1	rank_foraging	0
gene10977	gene862					gene5573	Kr-h1	rank_laying	0
gene5652	gene862					gene5573	Kr-h1	spl_score_wgt	0
gene6367	gene875					gene5573	Kr-h1	trips	0
gene5166	gene875					gene5675	lmd	ovary_score	0.0017809
gene8153	gene875					gene5675	lmd	p.both	0.0042693
gene15	gene887					gene5675	lmd	p.nectar	1.4842e-07
gene4584	gene887					gene5675	lmd	rank_foraging	5.8964e-07
gene10032	gene887					gene5675	lmd	rank_laying	1.8152e-07
gene8153	gene887					gene5675	lmd	spl_score_wgt	2.7472e-07
gene4818	gene887					gene5675	lmd	trips	2.3263e-08
gene10264	gene892					gene5687	CG12075	rank_foraging	0
gene8415	gene892					gene5687	CG12075	rank_laying	0.00011743
gene283	gene892					gene5687	CG12075	spl_score_wgt	0
gene9400	gene895					gene5687	CG12075	trips	3.5466e-05
gene11230	gene895					gene5713	bi	rank_foraging	6.2645e-06
gene1724	gene900					gene5713	bi	rank_laying	9.0564e-05
gene7405	gene913					gene5713	bi	spl_score_wgt	2.4902e-06
gene8153	gene916					gene5914	foxo	p.nectar	0.0048376
gene38	gene918					gene5914	foxo	rank_foraging	0.0013726
gene5374	gene927					gene5914	foxo	spl_score_wgt	0.0084592
gene8210	gene927					gene6073	CG17181	eggs	3.2581e-06
gene7102	gene935					gene6073	CG17181	ovary_score	0.0012112
gene10089	gene935					gene6073	CG17181	p.both	0.00014062
gene4584	gene938					gene6073	CG17181	rank_foraging	9.6912e-06
gene10264	gene938					gene6073	CG17181	rank_laying	2.9046e-06
gene2175	gene940					gene6073	CG17181	spl_score_wgt	4.4423e-06
gene8153	gene940					gene6073	CG17181	trips	3.4809e-07
gene3289	gene940					gene610	bab1	eggs	1.7243e-06
gene861	gene943					gene610	bab1	p.both	0.00025801
gene1824	gene943					gene610	bab1	p.nectar	0
gene4584	gene943					gene610	bab1	rank_foraging	0
gene8210	gene945					gene610	bab1	rank_laying	0
gene4122	gene945					gene610	bab1	spl_score_wgt	0
gene2175	gene945					gene610	bab1	trips	0
gene4584	gene948					gene6216	Ets65A	eggs	2.497e-08
gene11790	gene948					gene6216	Ets65A	ovary_score	6.8647e-09
gene4818	gene952					gene6216	Ets65A	p.nectar	8.249e-14
gene15	gene952					gene6216	Ets65A	rank_foraging	0
gene4584	gene953					gene6216	Ets65A	rank_laying	0
gene9400	gene953					gene6216	Ets65A	spl_score_wgt	0
gene10032	gene953					gene6216	Ets65A	trips	0
gene1064	gene959					gene6367	bab1	eggs	0.0046822
gene1724	gene959					gene6367	bab1	ovary_score	0.00020972
gene8210	gene961					gene6367	bab1	p.both	0.0042693
gene1724	gene961					gene6367	bab1	p.nectar	0.0041317
gene2174	gene961					gene6367	bab1	rank_foraging	5.8964e-07
gene1724	gene964					gene6367	bab1	rank_laying	9.0105e-05
gene4596	gene974					gene6367	bab1	spl_score_wgt	0.00012431
gene4069	gene977					gene6367	bab1	trips	1.8015e-05
gene10032	gene977					gene6402	Br140	p.pollen	3.6875e-05
gene1724	gene977					gene6402	Br140	rank_laying	0.006217
gene10323	gene982					gene6402	Br140	spl_score_wgt	0.0076581
gene10375	gene982					gene6564	CrebA	eggs	0.00096747
gene15	gene983					gene6564	CrebA	ovary_score	0.0024696
gene610	gene983					gene6564	CrebA	p.both	7.7707e-05
gene7405	gene983					gene6564	CrebA	p.pollen	0.0034616
gene3923	gene985					gene6564	CrebA	rank_foraging	0.0045509
gene4480	gene985					gene6564	CrebA	trips	0.0066727
gene6659	gene985					gene6659	CG31460	p.both	7.6476e-05
gene8124	gene993					gene6696	dmrt93B	eggs	0
gene10264	gene993					gene6696	dmrt93B	ovary_score	0
gene283	gene993					gene6696	dmrt93B	p.both	0.00057282
gene11267	gene998					gene6696	dmrt93B	p.nectar	1.13e-12
gene11942	gene998					gene6696	dmrt93B	p.pollen	0
gene4584	gene1001					gene6696	dmrt93B	rank_foraging	0
gene8153	gene1001					gene6696	dmrt93B	rank_laying	0
gene7405	gene1001					gene6696	dmrt93B	spl_score_wgt	0
gene15	gene1005					gene6696	dmrt93B	trips	0
gene8153	gene1009					gene6843	jumu	rank_foraging	0.00046447
gene8124	gene1022					gene6843	jumu	rank_laying	0.002446
gene10724	gene1026					gene6843	jumu	spl_score_wgt	0.00028558
gene5166	gene1028					gene6843	jumu	trips	0.00081357
gene8210	gene1028					gene6998	Scm	ovary_score	0.0029581
gene2174	gene1030					gene6998	Scm	trips	0.0032155
gene8124	gene1031					gene7167	aop	eggs	0
gene8124	gene1035					gene7167	aop	ovary_score	0
gene4584	gene1037					gene7167	aop	p.both	0.00011953
gene8153	gene1037					gene7167	aop	p.nectar	0
gene15	gene1037					gene7167	aop	p.pollen	1.0114e-12
gene8153	gene1039					gene7167	aop	rank_foraging	0
gene15	gene1039					gene7167	aop	rank_laying	0
gene1724	gene1039					gene7167	aop	spl_score_wgt	0
gene4584	gene1040					gene7167	aop	trips	0
gene8153	gene1040					gene7318	fd59A	p.nectar	9.5864e-05
gene15	gene1040					gene7318	fd59A	rank_foraging	0.0084172
gene7405	gene1040					gene7318	fd59A	spl_score_wgt	0.0065277
gene15	gene1041					gene7405	usp	eggs	0
gene10032	gene1041					gene7405	usp	ovary_score	0
gene10187	gene1044					gene7405	usp	p.both	0
gene283	gene1044					gene7405	usp	p.nectar	0
gene5166	gene1053					gene7405	usp	p.pollen	0
gene5221	gene1053					gene7405	usp	rank_foraging	0
gene10977	gene1054					gene7405	usp	rank_laying	0
gene3770	gene1054					gene7405	usp	spl_score_wgt	0
gene3289	gene1061					gene7405	usp	trips	0
gene8906	gene1061					gene7696	Usf	rank_foraging	0
gene2557	gene1061					gene7696	Usf	rank_laying	0
gene11942	gene1064					gene7696	Usf	spl_score_wgt	0
gene8210	gene1064					gene7696	Usf	trips	0
gene10032	gene1066					gene8038	CG11456	rank_foraging	0.00073206
gene15	gene1067					gene8038	CG11456	rank_laying	0.0082128
gene7405	gene1069					gene8038	CG11456	spl_score_wgt	0.0023336
gene38	gene1070					gene8038	CG11456	trips	0.00040656
gene610	gene1070					gene8124	opa	eggs	0
gene5652	gene1100					gene8124	opa	ovary_score	0
gene1047	gene1100					gene8124	opa	p.both	7.7492e-08
gene2174	gene1103					gene8124	opa	p.nectar	0
gene9856	gene1103					gene8124	opa	p.pollen	0
gene2055	gene1103					gene8124	opa	rank_foraging	0
gene15	gene1104					gene8124	opa	rank_laying	0
gene7167	gene1104					gene8124	opa	spl_score_wgt	0
gene10247	gene1104					gene8124	opa	trips	0
gene8153	gene1105					gene8153	Hsf	eggs	0
gene4584	gene1105					gene8153	Hsf	ovary_score	0
gene11942	gene1105					gene8153	Hsf	p.both	0
gene4818	gene1105					gene8153	Hsf	p.nectar	0
gene11696	gene1109					gene8153	Hsf	p.pollen	0
gene4584	gene1123					gene8153	Hsf	rank_foraging	0
gene7167	gene1125					gene8153	Hsf	rank_laying	0
gene4584	gene1126					gene8153	Hsf	spl_score_wgt	0
gene11131	gene1126					gene8153	Hsf	trips	0
gene9187	gene1129					gene8210	Blimp-1	eggs	0
gene1047	gene1129					gene8210	Blimp-1	ovary_score	0
gene15	gene1131					gene8210	Blimp-1	p.both	0
gene10187	gene1132					gene8210	Blimp-1	p.nectar	0
gene11897	gene1133					gene8210	Blimp-1	p.pollen	0
gene10247	gene1133					gene8210	Blimp-1	rank_foraging	0
gene1724	gene1136					gene8210	Blimp-1	rank_laying	0
gene6073	gene1136					gene8210	Blimp-1	spl_score_wgt	0
gene9856	gene1142					gene8210	Blimp-1	trips	0
gene8124	gene1148					gene8256	MTF-1	eggs	1.0475e-08
gene15	gene1149					gene8256	MTF-1	ovary_score	0
gene4584	gene1154					gene8256	MTF-1	p.pollen	0.00053398
gene3473	gene1156					gene8256	MTF-1	rank_foraging	0
gene15	gene1156					gene8256	MTF-1	rank_laying	0
gene11942	gene1157					gene8256	MTF-1	spl_score_wgt	0
gene6402	gene1157					gene8256	MTF-1	trips	4.3689e-07
gene4212	gene1157					gene831	MEP-1	trips	0.0006638
gene2174	gene1158					gene8339	MBD-R2	rank_foraging	0
gene5687	gene1158					gene8339	MBD-R2	rank_laying	0
gene11063	gene1176					gene8339	MBD-R2	spl_score_wgt	0
gene5713	gene1180					gene8339	MBD-R2	trips	0
gene12252	gene1180					gene8415	ken	eggs	1.7869e-06
gene15	gene1186					gene8415	ken	ovary_score	0.00012524
gene4584	gene1186					gene8415	ken	p.nectar	5.3089e-06
gene8153	gene1186					gene8415	ken	rank_foraging	0
gene11063	gene1195					gene8415	ken	rank_laying	0
gene10977	gene1195					gene8415	ken	spl_score_wgt	0
gene542	gene1195					gene8415	ken	trips	1.1102e-16
gene5555	gene1201					gene8431	CG11966	ovary_score	0.00024319
gene7889	gene1201					gene8431	CG11966	p.pollen	3.7881e-05
gene4818	gene1202					gene8431	CG11966	rank_foraging	0
gene8210	gene1202					gene8431	CG11966	rank_laying	0
gene5166	gene1202					gene8431	CG11966	spl_score_wgt	0
gene7405	gene1203					gene8431	CG11966	trips	0
gene15	gene1203					gene8488	CG9305	trips	0.0091006
gene8210	gene1203					gene8599	cyc	p.nectar	8.4262e-06
gene7405	gene1205					gene8599	cyc	rank_foraging	6.4543e-06
gene8210	gene1211					gene8599	cyc	rank_laying	2.4189e-06
gene2175	gene1211					gene8599	cyc	spl_score_wgt	3.4161e-06
gene6843	gene1211					gene8599	cyc	trips	4.3689e-07
gene831	gene1211					gene861	CTCF	eggs	0.0054923
gene1156	gene1216					gene861	CTCF	p.both	1.7988e-06
gene4584	gene1219					gene861	CTCF	p.pollen	0.0025649
gene8153	gene1219					gene861	CTCF	rank_foraging	4.32e-06
gene8415	gene1219					gene861	CTCF	rank_laying	4.7039e-07
gene283	gene1219					gene861	CTCF	spl_score_wgt	4.3469e-06
gene4584	gene1220					gene861	CTCF	trips	0.0046086
gene8153	gene1220					gene8906	CG11414	eggs	0.00098445
gene10375	gene1227					gene8906	CG11414	ovary_score	9.8649e-10
gene7729	gene1227					gene8906	CG11414	p.both	1.6375e-05
gene10292	gene1227					gene8906	CG11414	p.nectar	2.4994e-05
gene4584	gene1229					gene8906	CG11414	p.pollen	0
gene7405	gene1229					gene8906	CG11414	rank_foraging	0
gene6367	gene1229					gene8906	CG11414	rank_laying	0
gene10089	gene1231					gene8906	CG11414	spl_score_wgt	0
gene11063	gene1231					gene8906	CG11414	trips	0
gene11570	gene1231					gene9055	ush	eggs	0.0045921
gene7729	gene1232					gene9055	ush	ovary_score	5.9416e-07
gene6659	gene1232					gene9055	ush	p.nectar	0
gene6659	gene1235					gene9055	ush	rank_foraging	0
gene9416	gene1235					gene9055	ush	rank_laying	0
gene2175	gene1235					gene9055	ush	spl_score_wgt	0
gene7405	gene1250					gene9055	ush	trips	0
gene11604	gene1253					gene9107	Bgb	rank_laying	0.00050082
gene3473	gene1255					gene9107	Bgb	spl_score_wgt	0.0031237
gene1824	gene1255					gene9177	vri	eggs	0.0001951
gene11206	gene1255					gene9177	vri	p.both	4.0168e-06
gene8124	gene1256					gene9177	vri	p.nectar	1.8875e-05
gene5652	gene1260					gene9177	vri	rank_foraging	4.4702e-10
gene4041	gene1270					gene9177	vri	rank_laying	8.5991e-08
gene1047	gene1270					gene9177	vri	spl_score_wgt	1.4585e-07
gene8159	gene1270					gene9177	vri	trips	3.4833e-12
gene8153	gene1272					gene9400	CG15011	eggs	0.0018773
gene2174	gene1272					gene9400	CG15011	ovary_score	3.2338e-06
gene15	gene1273					gene9400	CG15011	p.nectar	0.0081558
gene5555	gene1282					gene9400	CG15011	p.pollen	1.5386e-09
gene9856	gene1282					gene9400	CG15011	rank_foraging	1.6702e-05
gene4636	gene1284					gene9400	CG15011	rank_laying	4.4225e-06
gene10089	gene1284					gene9400	CG15011	spl_score_wgt	7.0729e-06
gene861	gene1284					gene9400	CG15011	trips	0.00022141
gene4041	gene1289					gene943	CG1620	eggs	3.0788e-07
gene8159	gene1289					gene943	CG1620	ovary_score	4.8399e-06
gene11570	gene1289					gene943	CG1620	p.both	1.4323e-10
gene15	gene1296					gene943	CG1620	p.pollen	2.0385e-05
gene7729	gene1309					gene943	CG1620	rank_foraging	8.5539e-11
gene3920	gene1309					gene943	CG1620	rank_laying	1.5543e-15
gene6367	gene1317					gene943	CG1620	spl_score_wgt	8.4044e-14
gene1064	gene1317					gene943	CG1620	trips	5.5519e-11
gene11570	gene1317					gene9839	pho	eggs	3.796e-05
gene1282	gene1317					gene9839	pho	ovary_score	1.79e-05
gene2055	gene1320					gene9839	pho	p.nectar	2.5603e-06
gene11206	gene1320					gene9839	pho	p.pollen	5.4906e-06
gene10613	gene1324					gene9839	pho	rank_foraging	0
gene4584	gene1325					gene9839	pho	rank_laying	0
gene8153	gene1325					gene9839	pho	spl_score_wgt	0
gene10247	gene1332					gene9839	pho	trips	0
gene3473	gene1332					gene9856	bsh	p.nectar	0
gene9055	gene1333					gene9856	bsh	rank_foraging	2.8866e-15
gene10089	gene1349					gene9856	bsh	rank_laying	2.4292e-13
gene10977	gene1349					gene9856	bsh	spl_score_wgt	3.3307e-16
gene4584	gene1352					gene9856	bsh	trips	1.3064e-11
gene3770	gene1363
gene4775	gene1363
gene11342	gene1363
gene4584	gene1367
gene15	gene1367
gene4584	gene1371
gene6216	gene1371
gene7405	gene1376
gene8153	gene1376
gene9400	gene1376
gene5166	gene1387
gene10977	gene1390
gene11942	gene1395
gene5166	gene1403
gene4002	gene1403
gene2174	gene1404
gene8124	gene1404
gene8210	gene1404
gene7405	gene1407
gene1724	gene1407
gene5166	gene1408
gene6659	gene1408
gene4122	gene1408
gene11570	gene1408
gene2557	gene1412
gene8124	gene1412
gene7405	gene1412
gene2175	gene1413
gene5374	gene1413
gene5150	gene1416
gene5221	gene1416
gene7405	gene1420
gene5573	gene1420
gene8210	gene1425
gene11267	gene1425
gene8124	gene1426
gene7405	gene1426
gene2175	gene1433
gene6659	gene1433
gene3289	gene1433
gene4069	gene1438
gene8256	gene1438
gene4584	gene1438
gene7729	gene1439
gene11206	gene1443
gene4818	gene1443
gene15	gene1443
gene11258	gene1452
gene11570	gene1452
gene3920	gene1455
gene6659	gene1456
gene3923	gene1456
gene11258	gene1456
gene9416	gene1456
gene11267	gene1464
gene3473	gene1464
gene4596	gene1469
gene1998	gene1469
gene11485	gene1469
gene1047	gene1469
gene8488	gene1472
gene9381	gene1472
gene2174	gene1476
gene8124	gene1476
gene3473	gene1476
gene4818	gene1492
gene283	gene1492
gene12202	gene1499
gene5374	gene1499
gene8153	gene1500
gene11035	gene1501
gene943	gene1501
gene5227	gene1502
gene6659	gene1502
gene9034	gene1511
gene283	gene1511
gene4041	gene1517
gene4328	gene1517
gene10977	gene1517
gene5183	gene1517
gene8210	gene1534
gene6843	gene1537
gene6564	gene1537
gene10264	gene1539
gene8124	gene1539
gene3473	gene1556
gene11267	gene1556
gene3920	gene1556
gene4584	gene1568
gene1724	gene1568
gene6564	gene1568
gene5221	gene1570
gene6843	gene1570
gene5555	gene1575
gene1282	gene1575
gene9055	gene1576
gene8415	gene1576
gene10475	gene1585
gene4443	gene1587
gene10089	gene1605
gene7405	gene1612
gene15	gene1612
gene7167	gene1612
gene11206	gene1621
gene8210	gene1621
gene9400	gene1623
gene10247	gene1624
gene3920	gene1627
gene8124	gene1639
gene610	gene1642
gene10323	gene1642
gene4069	gene1656
gene11131	gene1656
gene2174	gene1669
gene8124	gene1669
gene7167	gene1669
gene2557	gene1669
gene8210	gene1681
gene5687	gene1681
gene7405	gene1684
gene5573	gene1684
gene38	gene1684
gene8210	gene1686
gene5713	gene1687
gene7729	gene1687
gene10089	gene1695
gene4041	gene1695
gene11485	gene1695
gene4041	gene1696
gene11485	gene1696
gene8124	gene1708
gene9055	gene1709
gene2055	gene1709
gene5214	gene1719
gene15	gene1719
gene11131	gene1719
gene5214	gene1721
gene15	gene1721
gene6367	gene1724
gene4818	gene1725
gene4584	gene1725
gene11425	gene1726
gene4212	gene1726
gene5166	gene1738
gene7405	gene1739
gene710	gene1741
gene4002	gene1741
gene2174	gene1745
gene10247	gene1748
gene3473	gene1748
gene8153	gene1749
gene8124	gene1749
gene7405	gene1749
gene6696	gene1761
gene10264	gene1761
gene4818	gene1761
gene5713	gene1769
gene8415	gene1769
gene8124	gene1770
gene4041	gene1773
gene5214	gene1779
gene15	gene1779
gene11942	gene1782
gene15	gene1782
gene2174	gene1787
gene283	gene1787
gene542	gene1787
gene4212	gene1789
gene10089	gene1789
gene1047	gene1792
gene11604	gene1792
gene8124	gene1797
gene11485	gene1799
gene5555	gene1800
gene1282	gene1800
gene11206	gene1803
gene8124	gene1803
gene4584	gene1804
gene6073	gene1804
gene4818	gene1809
gene7405	gene1809
gene10475	gene1810
gene9839	gene1810
gene10323	gene1814
gene9023	gene1814
gene10977	gene1819
gene10375	gene1819
gene1156	gene1824
gene943	gene1824
gene6073	gene1824
gene8850	gene1830
gene11485	gene1830
gene4212	gene1833
gene5150	gene1833
gene6905	gene1833
gene3473	gene1846
gene610	gene1846
gene11897	gene1846
gene8038	gene1846
gene8124	gene1849
gene610	gene1849
gene9856	gene1849
gene11942	gene1854
gene7405	gene1854
gene8643	gene1855
gene10375	gene1855
gene8210	gene1858
gene15	gene1858
gene6564	gene1858
gene9206	gene1868
gene4642	gene1868
gene1156	gene1877
gene9055	gene1877
gene11206	gene1885
gene4584	gene1894
gene1064	gene1894
gene4584	gene1896
gene2174	gene1898
gene8124	gene1898
gene4212	gene1903
gene6659	gene1903
gene10089	gene1903
gene5652	gene1909
gene38	gene1916
gene2174	gene1916
gene11206	gene1916
gene8124	gene1938
gene6216	gene1938
gene3920	gene1984
gene1531	gene1984
gene10247	gene1992
gene8124	gene2002
gene8153	gene2007
gene10032	gene2007
gene8834	gene2015
gene2174	gene2022
gene5214	gene2023
gene8834	gene2023
gene10247	gene2023
gene4584	gene2038
gene8124	gene2038
gene10264	gene2038
gene2174	gene2052
gene10475	gene2052
gene1610	gene2052
gene9856	gene2055
gene10724	gene2055
gene4818	gene2062
gene1724	gene2062
gene10032	gene2062
gene7405	gene2068
gene861	gene2072
gene542	gene2075
gene3289	gene2075
gene4584	gene2075
gene1064	gene2096
gene8210	gene2106
gene7405	gene2108
gene8124	gene2108
gene8153	gene2111
gene15	gene2111
gene283	gene2111
gene1064	gene2132
gene9107	gene2132
gene8210	gene2132
gene3289	gene2132
gene3289	gene2134
gene10247	gene2135
gene610	gene2135
gene8124	gene2144
gene7405	gene2144
gene8415	gene2144
gene9187	gene2146
gene8415	gene2147
gene10724	gene2147
gene1047	gene2147
gene4818	gene2148
gene8153	gene2148
gene7405	gene2149
gene8210	gene2158
gene8153	gene2160
gene10247	gene2163
gene10613	gene2165
gene8124	gene2166
gene7405	gene2167
gene10475	gene2167
gene9856	gene2174
gene5675	gene2174
gene6295	gene2174
gene3289	gene2175
gene8210	gene2186
gene11063	gene2186
gene11131	gene2187
gene9107	gene2193
gene3770	gene2193
gene6402	gene2193
gene5914	gene2198
gene10247	gene2198
gene38	gene2208
gene1724	gene2208
gene7405	gene2210
gene38	gene2210
gene5573	gene2210
gene4584	gene2211
gene4818	gene2211
gene11897	gene2215
gene38	gene2215
gene2174	gene2215
gene10613	gene2216
gene7167	gene2216
gene38	gene2222
gene7167	gene2222
gene4584	gene2222
gene283	gene2222
gene4041	gene2225
gene6624	gene2225
gene7405	gene2229
gene5573	gene2229
gene11230	gene2237
gene6081	gene2237
gene1156	gene2245
gene10247	gene2245
gene542	gene2247
gene3289	gene2247
gene4818	gene2251
gene2122	gene2251
gene8210	gene2251
gene38	gene2255
gene8415	gene2255
gene610	gene2255
gene8124	gene2257
gene2174	gene2257
gene10089	gene2266
gene11485	gene2266
gene4596	gene2266
gene8415	gene2271
gene1724	gene2278
gene3920	gene2278
gene5166	gene2279
gene6659	gene2279
gene2175	gene2279
gene4122	gene2279
gene3920	gene2282
gene4596	gene2284
gene7762	gene2284
gene8210	gene2288
gene1064	gene2288
gene8124	gene2289
gene9055	gene2289
gene8038	gene2289
gene6659	gene2290
gene7729	gene2290
gene3923	gene2291
gene11485	gene2291
gene5652	gene2295
gene4313	gene2305
gene7405	gene2306
gene1724	gene2306
gene5214	gene2312
gene1724	gene2312
gene10475	gene2313
gene4584	gene2314
gene283	gene2318
gene10032	gene2318
gene11897	gene2323
gene15	gene2326
gene4584	gene2326
gene3289	gene2327
gene1064	gene2327
gene2557	gene2327
gene1064	gene2328
gene9023	gene2334
gene542	gene2335
gene4596	gene2338
gene11485	gene2338
gene3920	gene2345
gene8159	gene2345
gene10247	gene2348
gene7729	gene2351
gene4041	gene2351
gene4480	gene2351
gene15	gene2352
gene7405	gene2352
gene3102	gene2356
gene283	gene2362
gene8153	gene2362
gene5227	gene2366
gene10089	gene2366
gene7729	gene2366
gene5374	gene2366
gene3169	gene2369
gene11035	gene2369
gene5150	gene2369
gene2347	gene2375
gene1384	gene2375
gene15	gene2376
gene1724	gene2376
gene2174	gene2387
gene9416	gene2388
gene8210	gene2389
gene9400	gene2389
gene1064	gene2389
gene610	gene2391
gene3473	gene2391
gene1724	gene2391
gene3473	gene2393
gene7405	gene2393
gene8124	gene2393
gene2557	gene2394
gene5573	gene2394
gene8124	gene2395
gene10724	gene2395
gene7405	gene2396
gene4584	gene2396
gene2174	gene2396
gene610	gene2396
gene7405	gene2398
gene2174	gene2398
gene15	gene2402
gene38	gene2402
gene8256	gene2402
gene11421	gene2411
gene10323	gene2411
gene11131	gene2412
gene15	gene2412
gene8834	gene2412
gene1724	gene2412
gene4636	gene2412
gene5652	gene2421
gene6081	gene2422
gene1724	gene2422
gene11206	gene2427
gene3289	gene2428
gene8210	gene2428
gene8210	gene2429
gene8210	gene2433
gene1064	gene2433
gene4596	gene2438
gene11206	gene2439
gene4818	gene2439
gene2175	gene2440
gene15	gene2440
gene10323	gene2443
gene5166	gene2448
gene15	gene2448
gene2174	gene2466
gene11421	gene2466
gene1282	gene2466
gene7405	gene2476
gene2557	gene2476
gene15	gene2476
gene12237	gene2477
gene1064	gene2496
gene15	gene2499
gene11942	gene2499
gene6402	gene2499
gene5166	gene2503
gene5374	gene2503
gene943	gene2503
gene8599	gene2507
gene10613	gene2512
gene4818	gene2516
gene5166	gene2516
gene1824	gene2516
gene38	gene2518
gene283	gene2518
gene10375	gene2518
gene9839	gene2521
gene10375	gene2522
gene1610	gene2522
gene15	gene2523
gene8451	gene2523
gene4041	gene2528
gene11604	gene2528
gene15	gene2532
gene5214	gene2532
gene8415	gene2533
gene6659	gene2536
gene4122	gene2536
gene8124	gene2546
gene4041	gene2556
gene6357	gene2556
gene10187	gene2556
gene8124	gene2570
gene10724	gene2570
gene7729	gene2586
gene8415	gene2598
gene7405	gene2598
gene9055	gene2598
gene8124	gene2598
gene3289	gene2603
gene283	gene2605
gene7729	gene2605
gene8415	gene2607
gene7167	gene2609
gene4584	gene2611
gene4328	gene2614
gene5713	gene2614
gene7729	gene2620
gene11206	gene2622
gene3920	gene2638
gene4584	gene2646
gene4069	gene2646
gene1064	gene2646
gene7405	gene2667
gene11942	gene2669
gene529	gene2669
gene3289	gene2669
gene8210	gene2688
gene6659	gene2691
gene11258	gene2691
gene5652	gene2691
gene943	gene2710
gene5150	gene2710
gene5374	gene2710
gene4584	gene2720
gene2174	gene2723
gene6659	gene2731
gene9839	gene2746
gene7405	gene2746
gene8210	gene2763
gene10475	gene2767
gene1282	gene2767
gene8834	gene2774
gene1724	gene2774
gene342	gene2774
gene4818	gene2782
gene4212	gene2782
gene9400	gene2795
gene9107	gene2795
gene5675	gene2800
gene9856	gene2803
gene7405	gene2803
gene4584	gene2804
gene8210	gene2804
gene5221	gene2804
gene1282	gene2807
gene15	gene2815
gene1064	gene2815
gene2055	gene2822
gene10032	gene2822
gene9856	gene2822
gene2174	gene2831
gene8210	gene2831
gene6073	gene2831
gene8124	gene2839
gene11942	gene2845
gene4002	gene2845
gene8124	gene2857
gene5449	gene2860
gene8159	gene2860
gene7885	gene2860
gene10089	gene2864
gene11485	gene2864
gene10089	gene2867
gene4002	gene2867
gene10475	gene2874
gene8124	gene2877
gene7405	gene2877
gene6216	gene2877
gene15	gene2878
gene8256	gene2878
gene8153	gene2878
gene9177	gene2879
gene8210	gene2879
gene2174	gene2879
gene11063	gene2893
gene5166	gene2893
gene8210	gene2897
gene10264	gene2897
gene2174	gene2897
gene7405	gene2898
gene8124	gene2898
gene1282	gene2898
gene12252	gene2903
gene8599	gene2903
gene4328	gene2903
gene10264	gene2924
gene283	gene2933
gene8210	gene2938
gene2175	gene2938
gene1064	gene2938
gene542	gene2950
gene5675	gene2950
gene1064	gene2950
gene8124	gene2956
gene861	gene2961
gene8415	gene2961
gene10475	gene2968
gene2174	gene2968
gene10375	gene2976
gene5652	gene2976
gene7405	gene2978
gene4002	gene2978
gene2174	gene2979
gene10724	gene2979
gene1805	gene2979
gene861	gene2980
gene11696	gene2980
gene11131	gene2989
gene3169	gene2998
gene5183	gene2998
gene2174	gene3000
gene5675	gene3000
gene6696	gene3000
gene7405	gene3000
gene11206	gene3000
gene2174	gene3003
gene7167	gene3003
gene7405	gene3003
gene8124	gene3003
gene7405	gene3004
gene5573	gene3004
gene15	gene3007
gene5221	gene3007
gene4818	gene3007
gene10475	gene3007
gene11604	gene3007
gene8415	gene3012
gene11485	gene3012
gene4328	gene3012
gene5595	gene3012
gene8124	gene3013
gene10323	gene3013
gene8124	gene3022
gene2174	gene3022
gene3473	gene3025
gene10247	gene3025
gene10475	gene3027
gene2174	gene3027
gene7405	gene3027
gene1724	gene3031
gene2557	gene3031
gene11267	gene3032
gene6216	gene3032
gene3473	gene3032
gene11942	gene3034
gene15	gene3037
gene6367	gene3041
gene5166	gene3041
gene1724	gene3041
gene10089	gene3041
gene2174	gene3042
gene8124	gene3042
gene7405	gene3042
gene10032	gene3053
gene10613	gene3053
gene7167	gene3053
gene8643	gene3058
gene4480	gene3058
gene943	gene3087
gene4584	gene3087
gene15	gene3090
gene7405	gene3090
gene9400	gene3090
gene10032	gene3098
gene861	gene3098
gene10089	gene3105
gene8906	gene3110
gene7405	gene3110
gene4313	gene3127
gene5150	gene3127
gene6402	gene3128
gene2175	gene3128
gene6659	gene3128
gene15	gene3132
gene7405	gene3132
gene7405	gene3136
gene283	gene3136
gene8153	gene3142
gene9107	gene3147
gene11942	gene3147
gene8906	gene3152
gene5675	gene3152
gene9055	gene3152
gene8153	gene3154
gene5573	gene3156
gene5221	gene3156
gene8038	gene3156
gene9055	gene3164
gene7167	gene3164
gene943	gene3169
gene6140	gene3169
gene10187	gene3175
gene4584	gene3179
gene10247	gene3184
gene8834	gene3184
gene8339	gene3185
gene7405	gene3185
gene342	gene3189
gene8834	gene3189
gene4636	gene3189
gene3289	gene3201
gene2174	gene3202
gene7167	gene3202
gene10475	gene3202
gene1282	gene3204
gene7167	gene3204
gene10247	gene3218
gene1724	gene3218
gene12252	gene3234
gene3289	gene3236
gene4584	gene3236
gene542	gene3236
gene3043	gene3237
gene5087	gene3237
gene10724	gene3250
gene9187	gene3250
gene11485	gene3257
gene11604	gene3257
gene5914	gene3257
gene10089	gene3257
gene4002	gene3260
gene6659	gene3260
gene7729	gene3260
gene7729	gene3265
gene9023	gene3271
gene6659	gene3271
gene8124	gene3271
gene10032	gene3284
gene8153	gene3284
gene542	gene3289
gene5555	gene3291
gene9856	gene3297
gene10323	gene3297
gene8124	gene3300
gene7405	gene3300
gene8153	gene3300
gene2174	gene3303
gene11897	gene3303
gene7405	gene3309
gene7405	gene3330
gene8906	gene3330
gene8834	gene3336
gene1724	gene3336
gene4596	gene3336
gene6696	gene3340
gene283	gene3340
gene7405	gene3348
gene8210	gene3348
gene1064	gene3348
gene8210	gene3352
gene4818	gene3352
gene8153	gene3353
gene2122	gene3353
gene4584	gene3354
gene11942	gene3354
gene5166	gene3354
gene8210	gene3354
gene11206	gene3360
gene8159	gene3370
gene10247	gene3374
gene8210	gene3383
gene5573	gene3383
gene2174	gene3383
gene3289	gene3394
gene10323	gene3416
gene1282	gene3416
gene8210	gene3417
gene4818	gene3417
gene8210	gene3419
gene5221	gene3419
gene10089	gene3420
gene1047	gene3420
gene6357	gene3420
gene7729	gene3441
gene5374	gene3441
gene3920	gene3441
gene5214	gene3444
gene11696	gene3444
gene5166	gene3445
gene1282	gene3445
gene1156	gene3473
gene38	gene3473
gene610	gene3473
gene8038	gene3473
gene2175	gene3480
gene6991	gene3480
gene4122	gene3480
gene4212	gene3482
gene6659	gene3482
gene10089	gene3482
gene2174	gene3483
gene5087	gene3485
gene11485	gene3485
gene11485	gene3490
gene8124	gene3498
gene5374	gene3501
gene9416	gene3501
gene11485	gene3507
gene7405	gene3508
gene8153	gene3518
gene943	gene3518
gene10977	gene3534
gene4041	gene3534
gene2055	gene3556
gene1282	gene3556
gene10264	gene3562
gene8124	gene3573
gene1724	gene3573
gene3473	gene3574
gene5214	gene3574
gene11131	gene3574
gene10475	gene3574
gene8124	gene3578
gene8153	gene3578
gene11485	gene3586
gene4041	gene3586
gene5555	gene3589
gene4584	gene3605
gene11942	gene3605
gene15	gene3605
gene10292	gene3612
gene9055	gene3615
gene3920	gene3615
gene5374	gene3622
gene4212	gene3622
gene8153	gene3634
gene10032	gene3634
gene4584	gene3636
gene10089	gene3637
gene15	gene3642
gene9055	gene3656
gene8210	gene3664
gene1724	gene3664
gene5166	gene3664
gene1064	gene3669
gene9055	gene3670
gene3169	gene3676
gene8850	gene3676
gene11425	gene3676
gene8124	gene3678
gene38	gene3678
gene10264	gene3678
gene10089	gene3680
gene11063	gene3680
gene1047	gene3680
gene4584	gene3681
gene1156	gene3681
gene8124	gene3682
gene7405	gene3682
gene4818	gene3685
gene4002	gene3685
gene11570	gene3687
gene8210	gene3688
gene2174	gene3688
gene10323	gene3691
gene15	gene3702
gene5374	gene3715
gene5374	gene3716
gene11790	gene3717
gene38	gene3725
gene8124	gene3728
gene7405	gene3728
gene12202	gene3734
gene9416	gene3734
gene8159	gene3734
gene2055	gene3736
gene1282	gene3736
gene542	gene3738
gene3770	gene3738
gene9400	gene3742
gene11942	gene3742
gene8124	gene3750
gene4584	gene3765
gene3234	gene3765
gene4584	gene3769
gene15	gene3769
gene7405	gene3771
gene15	gene3771
gene7167	gene3771
gene6357	gene3772
gene10475	gene3775
gene4002	gene3779
gene5166	gene3779
gene11035	gene3784
gene9177	gene3784
gene10475	gene3784
gene8415	gene3794
gene5652	gene3796
gene3770	gene3796
gene4818	gene3798
gene5166	gene3798
gene3923	gene3805
gene10089	gene3805
gene11258	gene3805
gene7405	gene3808
gene9400	gene3810
gene11790	gene3810
gene8124	gene3812
gene7167	gene3812
gene4584	gene3813
gene8153	gene3813
gene8153	gene3814
gene943	gene3814
gene5221	gene3814
gene11790	gene3827
gene1064	gene3827
gene7405	gene3830
gene9107	gene3836
gene11035	gene3836
gene4584	gene3846
gene9839	gene3846
gene4212	gene3846
gene3473	gene3853
gene8124	gene3853
gene5227	gene3863
gene3923	gene3863
gene9107	gene3864
gene2175	gene3865
gene8153	gene3867
gene8415	gene3877
gene3920	gene3877
gene11267	gene3877
gene5652	gene3877
gene6659	gene3887
gene2175	gene3887
gene3923	gene3887
gene3289	gene3887
gene11258	gene3896
gene3473	gene3897
gene8038	gene3897
gene4584	gene3898
gene8210	gene3906
gene1724	gene3906
gene7378	gene3906
gene8834	gene3909
gene4596	gene3909
gene8834	gene3916
gene5214	gene3922
gene610	gene3922
gene7762	gene3922
gene861	gene3922
gene38	gene3932
gene8210	gene3936
gene15	gene3938
gene11035	gene3944
gene3289	gene3944
gene9177	gene3944
gene2122	gene3944
gene2174	gene3950
gene5652	gene3951
gene9416	gene3951
gene610	gene3951
gene5555	gene3957
gene1282	gene3957
gene1488	gene3959
gene5150	gene3959
gene11063	gene3961
gene542	gene3961
gene4818	gene3969
gene12237	gene3969
gene4818	gene3973
gene10247	gene3973
gene9023	gene3974
gene8487	gene3974
gene4584	gene3975
gene11230	gene3975
gene7729	gene3977
gene6659	gene3979
gene861	gene3979
gene12252	gene3980
gene8124	gene3980
gene11485	gene3980
gene8834	gene3986
gene6659	gene3987
gene10264	gene3992
gene7729	gene3996
gene5227	gene3996
gene9416	gene3996
gene7729	gene4000
gene8210	gene4001
gene6564	gene4002
gene1998	gene4008
gene7762	gene4008
gene6659	gene4010
gene2175	gene4010
gene7405	gene4024
gene9416	gene4032
gene8488	gene4032
gene8124	gene4036
gene7405	gene4036
gene1047	gene4041
gene4328	gene4041
gene8415	gene4056
gene9187	gene4056
gene11485	gene4056
gene4212	gene4057
gene6659	gene4057
gene2175	gene4057
gene4041	gene4062
gene11485	gene4062
gene15	gene4069
gene8256	gene4069
gene10032	gene4069
gene5214	gene4069
gene10089	gene4077
gene5166	gene4077
gene6564	gene4077
gene10475	gene4082
gene6696	gene4084
gene4002	gene4088
gene861	gene4088
gene4212	gene4088
gene10187	gene4093
gene5227	gene4098
gene4041	gene4098
gene5183	gene4098
gene2174	gene4103
gene9856	gene4103
gene1282	gene4104
gene11063	gene4116
gene5214	gene4122
gene861	gene4122
gene38	gene4124
gene7167	gene4124
gene15	gene4124
gene8834	gene4125
gene10089	gene4125
gene1282	gene4129
gene3289	gene4129
gene1064	gene4129
gene1064	gene4130
gene38	gene4140
gene7167	gene4140
gene1156	gene4140
gene9177	gene4144
gene10475	gene4144
gene6905	gene4165
gene5150	gene4165
gene4584	gene4169
gene10724	gene4169
gene11230	gene4169
gene2122	gene4169
gene8124	gene4175
gene7405	gene4175
gene38	gene4177
gene15	gene4180
gene4584	gene4180
gene1156	gene4180
gene6696	gene4188
gene2174	gene4189
gene10475	gene4189
gene12314	gene4194
gene15	gene4194
gene4818	gene4196
gene10187	gene4196
gene8906	gene4196
gene11942	gene4203
gene15	gene4204
gene11035	gene4204
gene2174	gene4206
gene8124	gene4206
gene5166	gene4207
gene6564	gene4207
gene11063	gene4210
gene542	gene4210
gene7885	gene4210
gene11942	gene4212
gene11425	gene4212
gene8124	gene4225
gene12252	gene4225
gene8210	gene4235
gene3289	gene4235
gene4584	gene4235
gene10247	gene4241
gene8834	gene4241
gene1998	gene4241
gene8038	gene4242
gene10475	gene4244
gene1282	gene4244
gene2055	gene4244
gene9177	gene4248
gene8124	gene4254
gene5573	gene4256
gene8124	gene4256
gene2174	gene4257
gene4596	gene4272
gene4041	gene4272
gene5555	gene4282
gene1282	gene4282
gene8834	gene4285
gene5214	gene4285
gene38	gene4289
gene35	gene4289
gene8210	gene4291
gene4818	gene4291
gene7729	gene4292
gene3920	gene4292
gene4480	gene4292
gene4596	gene4293
gene8834	gene4295
gene8850	gene4295
gene3473	gene4296
gene8415	gene4296
gene6659	gene4310
gene11570	gene4318
gene11942	gene4318
gene10089	gene4318
gene3234	gene4328
gene4041	gene4328
gene8124	gene4334
gene5713	gene4334
gene3923	gene4334
gene7729	gene4334
gene11035	gene4335
gene4584	gene4336
gene15	gene4336
gene7405	gene4336
gene2125	gene4339
gene12237	gene4339
gene11570	gene4339
gene2174	gene4356
gene7405	gene4360
gene283	gene4360
gene2174	gene4360
gene5573	gene4360
gene38	gene4373
gene10247	gene4373
gene542	gene4374
gene11790	gene4374
gene5652	gene4375
gene3747	gene4375
gene8415	gene4375
gene8124	gene4377
gene7405	gene4377
gene1531	gene4384
gene2189	gene4384
gene3770	gene4384
gene8153	gene4399
gene3289	gene4399
gene4818	gene4400
gene5221	gene4400
gene542	gene4404
gene12202	gene4404
gene7729	gene4406
gene8210	gene4411
gene15	gene4411
gene3169	gene4411
gene4122	gene4414
gene11131	gene4417
gene861	gene4417
gene8834	gene4421
gene4596	gene4421
gene1049	gene4421
gene1384	gene4421
gene10032	gene4422
gene8153	gene4422
gene2122	gene4427
gene861	gene4427
gene10032	gene4430
gene283	gene4430
gene15	gene4431
gene8153	gene4431
gene11942	gene4431
gene9856	gene4432
gene1724	gene4432
gene6659	gene4436
gene8834	gene4439
gene3920	gene4441
gene10323	gene4442
gene3473	gene4442
gene5214	gene4453
gene9055	gene4453
gene6998	gene4453
gene5555	gene4461
gene1282	gene4461
gene1282	gene4462
gene5555	gene4462
gene9856	gene4462
gene10323	gene4463
gene9856	gene4463
gene7318	gene4463
gene1064	gene4466
gene6843	gene4466
gene8153	gene4473
gene1064	gene4473
gene6659	gene4485
gene3289	gene4485
gene8210	gene4485
gene4596	gene4492
gene529	gene4492
gene38	gene4496
gene7167	gene4496
gene11035	gene4503
gene8153	gene4503
gene4041	gene4506
gene943	gene4511
gene4818	gene4517
gene7405	gene4517
gene10375	gene4520
gene5652	gene4520
gene10821	gene4520
gene11421	gene4534
gene8153	gene4536
gene5374	gene4537
gene8210	gene4537
gene6659	gene4537
gene4212	gene4537
gene38	gene4543
gene4584	gene4543
gene10292	gene4556
gene283	gene4556
gene9023	gene4556
gene10475	gene4560
gene8210	gene4560
gene861	gene4574
gene10375	gene4575
gene5652	gene4575
gene10323	gene4579
gene9856	gene4579
gene2055	gene4579
gene8153	gene4584
gene7405	gene4584
gene8415	gene4585
gene9187	gene4585
gene3923	gene4585
gene3102	gene4585
gene8124	gene4589
gene6367	gene4589
gene1282	gene4589
gene8124	gene4590
gene11421	gene4590
gene1998	gene4596
gene342	gene4596
gene5221	gene4599
gene1064	gene4599
gene542	gene4624
gene2122	gene4624
gene8153	gene4633
gene283	gene4633
gene6659	gene4654
gene861	gene4654
gene4212	gene4654
gene15	gene4663
gene4584	gene4663
gene7167	gene4663
gene11790	gene4666
gene1610	gene4666
gene4818	gene4669
gene1064	gene4669
gene6073	gene4669
gene9177	gene4675
gene8210	gene4675
gene5150	gene4675
gene10264	gene4677
gene5555	gene4686
gene3920	gene4689
gene10475	gene4690
gene7806	gene4690
gene5214	gene4699
gene4122	gene4699
gene8488	gene4702
gene1363	gene4702
gene6659	gene4709
gene2175	gene4709
gene5166	gene4711
gene10264	gene4714
gene4818	gene4714
gene9400	gene4717
gene1488	gene4717
gene9107	gene4717
gene10292	gene4723
gene15	gene4735
gene1724	gene4735
gene6696	gene4735
gene6696	gene4738
gene8124	gene4739
gene7405	gene4739
gene6216	gene4739
gene2174	gene4739
gene4818	gene4750
gene10475	gene4761
gene2174	gene4761
gene8210	gene4762
gene2174	gene4762
gene610	gene4762
gene11485	gene4768
gene11604	gene4768
gene7405	gene4771
gene2557	gene4771
gene4584	gene4773
gene7405	gene4773
gene15	gene4774
gene7405	gene4776
gene8906	gene4776
gene6073	gene4776
gene3289	gene4778
gene5150	gene4778
gene12099	gene4794
gene12109	gene4794
gene5374	gene4794
gene12099	gene4795
gene12093	gene4795
gene11230	gene4801
gene283	gene4801
gene15	gene4801
gene11230	gene4814
gene9381	gene4820
gene2853	gene4820
gene5652	gene4821
gene10375	gene4821
gene4818	gene4830
gene6367	gene4830
gene3169	gene4846
gene861	gene4846
gene8850	gene4846
gene4584	gene4855
gene6624	gene4856
gene5555	gene4856
gene4584	gene4857
gene9839	gene4857
gene10475	gene4870
gene1610	gene4870
gene11107	gene4870
gene10724	gene4879
gene6696	gene4879
gene8124	gene4884
gene10089	gene4886
gene3923	gene4886
gene1064	gene4887
gene11942	gene4887
gene15	gene4887
gene3289	gene4887
gene2175	gene4888
gene6659	gene4888
gene861	gene4888
gene9400	gene4890
gene7405	gene4892
gene10089	gene4894
gene12237	gene4894
gene7405	gene4896
gene1282	gene4905
gene9856	gene4905
gene2055	gene4905
gene8487	gene4924
gene9416	gene4924
gene7405	gene4931
gene15	gene4931
gene9055	gene4931
gene15	gene4933
gene8599	gene4938
gene2557	gene4938
gene8415	gene4939
gene6073	gene4940
gene10032	gene4940
gene8153	gene4940
gene5652	gene4941
gene6696	gene4942
gene6216	gene4942
gene2174	gene4965
gene283	gene4986
gene8153	gene4986
gene38	gene4989
gene10613	gene4989
gene8834	gene4996
gene8153	gene4997
gene7405	gene4997
gene11342	gene5017
gene6696	gene5022
gene7405	gene5022
gene15	gene5034
gene7405	gene5034
gene610	gene5034
gene1824	gene5034
gene7167	gene5038
gene11942	gene5038
gene8124	gene5048
gene9023	gene5049
gene1047	gene5049
gene10977	gene5061
gene4041	gene5061
gene6073	gene5078
gene8153	gene5078
gene4122	gene5079
gene11942	gene5103
gene4584	gene5103
gene8210	gene5106
gene6367	gene5106
gene10475	gene5107
gene10323	gene5107
gene1610	gene5107
gene1064	gene5112
gene8153	gene5112
gene2798	gene5113
gene2175	gene5113
gene1488	gene5113
gene4596	gene5117
gene8834	gene5117
gene7762	gene5117
gene6905	gene5118
gene5214	gene5118
gene8210	gene5121
gene1724	gene5121
gene7167	gene5122
gene5713	gene5122
gene8415	gene5126
gene9055	gene5126
gene5914	gene5127
gene7167	gene5129
gene11604	gene5129
gene5914	gene5129
gene11485	gene5137
gene4041	gene5137
gene5166	gene5142
gene4584	gene5143
gene9400	gene5143
gene15	gene5144
gene7405	gene5144
gene10264	gene5144
gene2189	gene5151
gene10977	gene5151
gene3473	gene5151
gene3770	gene5151
gene5652	gene5155
gene10247	gene5155
gene8210	gene5166
gene12237	gene5166
gene6843	gene5166
gene283	gene5173
gene10977	gene5177
gene4041	gene5177
gene2174	gene5182
gene15	gene5184
gene1282	gene5188
gene5573	gene5188
gene6367	gene5188
gene861	gene5201
gene8488	gene5201
gene11206	gene5203
gene10475	gene5203
gene4313	gene5210
gene7729	gene5210
gene15	gene5214
gene11131	gene5214
gene15	gene5221
gene1282	gene5221
gene3289	gene5227
gene12237	gene5227
gene542	gene5227
gene10977	gene5227
gene10032	gene5233
gene8389	gene5244
gene3234	gene5244
gene9023	gene5244
gene10247	gene5244
gene4328	gene5253
gene8159	gene5253
gene10977	gene5253
gene4480	gene5274
gene861	gene5274
gene6073	gene5275
gene15	gene5275
gene2174	gene5301
gene7167	gene5301
gene283	gene5301
[truncated: 2,502 more rows]
