# Supplementary material for: Individual differences in honey bee behavior enabled by plasticity in brain gene regulatory networks
Source: bioRxiv preprint, doi:10.1101/2020.09.09.289272, version 2 (2020-12-12)
Supplement: Supplemental File 9 [file 289272_file11.xlsx]

## Sheet: StudiesIncluded
Apis mellifera (Amel)
Study	Reference	DOI	Type	Comparison	Tissue
Amel_1	Alaux et al. 2009	doi.org/10.1111/j.1601-183X.2009.00480.x	differential expression	nurse vs. forager	brain
Amel_2	Whitfield et al. 2003	10.1126/science.1086807	differential expression	nurse vs. forager	brain
Amel_3	Grozinger et al. 2007	10.1111/j.1365-294X.2007.03545.x	differential expression	queen vs. sterile worker vs. reproductive worker	brain
Megalopta genalis (Mgen)
Study	Reference	DOI	Type	Comparison	Tissue
Mgen_1	Jones et al. 2017	10.1098/rspb.2016.2228	differential expression	queen vs. worker	brain
Polistes metricus (Pmet)
Study	Reference	DOI	Type	Comparison	Tissue
Pmet_1	Toth et al. 2010	10.1098/rspb.2010.0090	differential expression	queen vs. worker	brain
Selection studies (Comp)
Study	Reference	DOI	Type	Comparison	Tissue
Comp_1	Woodard et al. 2011	10.1073/pnas.1103457108	selection	genes evolving in highly eusocial lineages	N/A
Comp_2	Kapheim et al. 2015	10.1126/science.aaa4788	selection	genes with signatures of positive selection in social lineages	N/A
Comp_3	Harpur et al. 2014	10.1073/pnas.1315506111	selection	genes under positive selection in Apis mellifera	N/A

## Sheet: Amel_1
Amel_1		Alaux et al. All_tested	Alaux NvsF	Alaux N>F	Alaux F>N	Converted:	Alaux et al. All_tested	Alaux NvsF	Alaux N>F	Alaux F>N		Shared Universe		IN	FvsL	F>L	L>F	Alaux NvsF	Alaux N>F	Alaux F>N	Overlaps:	FvsL NvF	F>L N>F	F>L F>N	L>F N>F	L>F F>N
OVERLAP FvsL NvF		GB40005	GB40071	GB40071	GB40074		gene0	gene10023	gene10023	gene10000		gene0		SHARED	gene10001	gene10001	gene10006	gene10014	gene10075	gene10014		gene10014	gene10318	gene10014	gene10075	gene10089
Set1: 2254		GB40007	GB40431	GB40431	GB40120		gene100	gene10075	gene10075	gene1001		gene100		UNIVERSE	gene10006	gene10009	gene10007	gene10032	gene10173	gene10032		gene10032	gene10783	gene10032	gene10224	gene10150
Set2: 463		GB40010	GB40590	GB40590	GB40126		gene10001	gene10172	gene10172	gene10014		gene10001			gene10007	gene10014	gene10025	gene10075	gene10224	gene10089		gene10075	gene1140	gene10184	gene10225	gene10435
Overlap: 259		GB40012	GB40877	GB40877	GB40134		gene10002	gene10173	gene10173	gene10032		gene10002			gene10009	gene10026	gene10037	gene10089	gene10225	gene10150		gene10089	gene1211	gene1035	gene10358	gene11570
Total number of genes: 4642		GB40013	GB40903	GB40903	GB40205		gene10005	gene10187	gene10187	gene10089		gene10005			gene10014	gene10032	gene10075	gene10150	gene10271	gene10184		gene10150	gene1332	gene10359	gene10475	gene1186
		GB40014	GB42614	GB42614	GB40251		gene10006	gene10224	gene10224	gene10105		gene10006			gene10025	gene10035	gene10078	gene10173	gene10318	gene1019		gene10184	gene1769	gene10477	gene10515	gene12184
Representation factor: 1.2		GB40015	GB42708	GB42708	GB40283		gene10007	gene10225	gene10225	gene10150		gene10007			gene10026	gene10053	gene10089	gene10184	gene10325	gene1035		gene10224	gene2293	gene10511	gene10706	gene1229
p < 4.799e-04		GB40016	GB42811	GB42811	GB40336		gene10009	gene10271	gene10271	gene10184		gene10009			gene10032	gene1009	gene10099	gene1019	gene10358	gene10352		gene10225	gene2621	gene10605	gene10774	gene1253
		GB40017	GB44461	GB44461	GB40426		gene10010	gene10318	gene10318	gene1019		gene10010			gene10035	gene10097	gene10104	gene10224	gene10381	gene10359		gene10318	gene2752	gene10626	gene109	gene1719
		GB40019	GB45202	GB45202	GB40481		gene10014	gene10325	gene10325	gene1035		gene10014			gene10037	gene101	gene10115	gene10225	gene10475	gene10435		gene1035	gene2922	gene10633	gene1092	gene1827
OVERLAP F>L N>F		GB40020	GB45223	GB45223	GB40514		gene10018	gene10358	gene10358	gene10352		gene10018			gene10053	gene10109	gene10119	gene10271	gene10515	gene10477		gene10358	gene3442	gene10781	gene1132	gene1846
Set1: 1180		GB40021	GB45369	GB45369	GB40713		gene10023	gene10381	gene10381	gene10359		gene10025			gene10075	gene10114	gene10120	gene10318	gene10568	gene10511		gene10359	gene347	gene10826	gene11350	gene1896
Set2: 251		GB40022	GB46040	GB46040	GB40735		gene10025	gene10475	gene10475	gene10366		gene10026			gene10078	gene10155	gene10124	gene10325	gene10706	gene10559		gene10435	gene3475	gene11183	gene11420	gene2533
Overlap: 29		GB40027	GB49285	GB49285	GB40746		gene10026	gene10515	gene10515	gene10435		gene10032			gene10089	gene10159	gene10129	gene1035	gene10774	gene10602		gene10475	gene3720	gene11246	gene11421	gene2873
Total number of genes: 4642		GB40028	GB49584	GB49584	GB40747		gene10032	gene10568	gene10568	gene10477		gene10035			gene1009	gene10184	gene10150	gene10352	gene10783	gene10605		gene10477	gene4239	gene11288	gene1157	gene328
		GB40030	GB50138	GB50138	GB40754		gene10035	gene1057	gene1057	gene10511		gene10036			gene10097	gene10197	gene10178	gene10358	gene10825	gene10626		gene10511	gene550	gene11307	gene11588	gene3306
Representation factor: 0.5		GB40032	GB50534	GB50534	GB40765		gene10036	gene10706	gene10706	gene10559		gene10037			gene10099	gene10199	gene10194	gene10359	gene10872	gene10633		gene10515	gene5823	gene11457	gene11649	gene3444
p < 1.870e-08		GB40033	GB50709	GB50709	GB40830		gene10037	gene10774	gene10774	gene10602		gene10040			gene101	gene10227	gene10203	gene10381	gene10881	gene10781		gene10605	gene6926	gene11481	gene11657	gene3681
		GB40053	GB51720	GB51720	GB40842		gene10040	gene10783	gene10783	gene10605		gene10053			gene10104	gene10228	gene1021	gene10435	gene109	gene10810		gene10626	gene7082	gene11971	gene11743	gene389
		GB40057	GB51753	GB51753	GB40863		gene10053	gene10825	gene10825	gene10621		gene10057			gene10109	gene10232	gene10224	gene10475	gene1092	gene10826		gene10633	gene7316	gene12286	gene11747	gene4056
OVERLAP F>L F>N		GB40063	GB54789	GB54789	GB40866		gene10057	gene10872	gene10872	gene10626		gene1007			gene10114	gene10239	gene10225	gene10477	gene10997	gene11001		gene10706	gene7421	gene1230	gene11850	gene4068
Set1: 1180		GB40064	GB55231	GB55231	GB40883		gene1007	gene10881	gene10881	gene10633		gene10075			gene10115	gene10244	gene10230	gene10511	gene11	gene11157		gene10774	gene7930	gene1379	gene119	gene4180
Set2: 212		GB40067	GB55232	GB55232	GB40906		gene10075	gene109	gene109	gene10657		gene10078			gene10119	gene1026	gene10253	gene10515	gene11003	gene11183		gene10781	gene7956	gene1476	gene1203	gene426
Overlap: 93		GB40071	GB55586	GB55586	GB40913		gene10076	gene1092	gene1092	gene10698		gene10079			gene10120	gene10262	gene10257	gene10559	gene11140	gene11225		gene10783	gene8459	gene1663	gene12193	gene4296
Total number of genes: 4642		GB40072	GB40089	GB40089	GB40950		gene10078	gene10957	gene10957	gene10781		gene10089			gene10124	gene10264	gene10263	gene10568	gene11159	gene11246		gene10826	gene8551	gene1669	gene12284	gene4584
		GB40073	GB40113	GB40113	GB40976		gene10079	gene10997	gene10997	gene10810		gene1009			gene10129	gene1028	gene10288	gene10602	gene11172	gene11288		gene109	gene9145	gene1807	gene1242	gene5813
Representation factor: 1.7		GB40074	GB40150	GB40150	GB40997		gene10081	gene11	gene11	gene10826		gene10094			gene10150	gene10291	gene10304	gene10605	gene11186	gene11307		gene1092	gene9167	gene2111	gene1294	gene6048
p < 1.707e-09		GB40076	GB40155	GB40155	GB41212		gene10089	gene11003	gene11003	gene10827		gene10097			gene10155	gene10296	gene10327	gene10626	gene1132	gene11347		gene11183	gene9257	gene2210	gene1333	gene6087
		GB40077	GB40163	GB40163	GB41220		gene1009	gene11124	gene11124	gene10968		gene10099			gene10159	gene103	gene10328	gene10633	gene11350	gene11368		gene11246	gene9276	gene238	gene1391	gene615
		GB40083	GB40164	GB40164	GB41283		gene10094	gene11140	gene11140	gene11001		gene101			gene10178	gene1030	gene10333	gene10706	gene11362	gene11457		gene11288		gene2386	gene1492	gene6681
OVERLAP L>F N>F		GB40084	GB40240	GB40240	GB41284		gene10097	gene11159	gene11159	gene11134		gene10103			gene10184	gene10311	gene10344	gene10774	gene11390	gene11478		gene11307		gene2387	gene1772	gene6802
Set1: 1074		GB40089	GB40265	GB40265	GB41332		gene10099	gene11171	gene11171	gene11157		gene10104			gene10194	gene10318	gene10346	gene10781	gene1140	gene11481		gene1132		gene2396	gene180	gene7840
Set2: 251		GB40091	GB40271	GB40271	GB41339		gene101	gene11172	gene11172	gene11183		gene10106			gene10197	gene10323	gene10358	gene10783	gene11420	gene11537		gene11350		gene2720	gene1898	gene7999
Overlap: 101		GB40092	GB40278	GB40278	GB41374		gene10103	gene11186	gene11186	gene11225		gene10108			gene10199	gene10326	gene1036	gene10810	gene11421	gene11548		gene1140		gene2822	gene210	gene8043
Total number of genes: 4642		GB40095	GB40301	GB40301	GB41376		gene10104	gene1132	gene1132	gene11246		gene10109			gene10203	gene10332	gene10382	gene10825	gene11551	gene11570		gene11420		gene2856	gene2132	gene8248
		GB40098	GB40341	GB40341	GB41383		gene10106	gene11350	gene11350	gene11288		gene10114			gene1021	gene10335	gene10386	gene10826	gene11552	gene11805		gene11421		gene2934	gene2193	gene8328
Representation factor: 1.7		GB40100	GB40438	GB40438	GB41387		gene10108	gene11362	gene11362	gene11290		gene10115			gene10224	gene10341	gene10391	gene10872	gene1157	gene1186		gene11457		gene3068	gene2211	gene8511
p < 3.656e-10		GB40102	GB40445	GB40445	GB41388		gene10109	gene11388	gene11388	gene11299		gene10119			gene10225	gene1035	gene10402	gene10881	gene11588	gene11933		gene11481		gene3202	gene2226
		GB40106	GB40448	GB40448	GB41638		gene10114	gene11390	gene11390	gene11307		gene10120			gene10227	gene10357	gene10406	gene109	gene11641	gene11971		gene1157		gene3348	gene2263
		GB40107	GB40492	GB40492	GB41655		gene10115	gene1140	gene1140	gene11347		gene10124			gene10228	gene10359	gene10421	gene1092	gene11649	gene11987		gene11570		gene3416	gene2411
OVERLAP L>F F>N		GB40108	GB40539	GB40539	GB41662		gene10119	gene11420	gene11420	gene11368		gene10126			gene10230	gene10375	gene10433	gene10997	gene11657	gene12111		gene11588		gene3481	gene2466
Set1: 1074		GB40109	GB40541	GB40541	GB41671		gene10120	gene11421	gene11421	gene11443		gene10128			gene10232	gene10403	gene10435	gene11	gene1172	gene12184		gene11649		gene3562	gene2512
Set2: 212		GB40112	GB40566	GB40566	GB41700		gene10124	gene11551	gene11551	gene11457		gene10129			gene10239	gene10407	gene1044	gene11001	gene11743	gene12264		gene11657		gene363	gene2605
Overlap: 37		GB40113	GB40608	GB40608	GB41742		gene10126	gene11552	gene11552	gene11478		gene10145			gene10244	gene10408	gene10441	gene11003	gene11747	gene12286		gene11743		gene3678	gene2723
Total number of genes: 4642		GB40118	GB40655	GB40655	GB41779		gene10128	gene1157	gene1157	gene11481		gene1015			gene10253	gene10413	gene10447	gene11140	gene11756	gene1229		gene11747		gene4017	gene2898
		GB40119	GB40776	GB40776	GB41803		gene10129	gene11580	gene11580	gene11505		gene10150			gene10257	gene10425	gene10452	gene11157	gene11786	gene1230		gene11850		gene4131	gene2932
Representation factor: 0.8		GB40126	GB40778	GB40778	GB41845		gene10131	gene11588	gene11588	gene11537		gene10154			gene1026	gene10427	gene10463	gene11159	gene11840	gene1253		gene1186		gene4189	gene300
p < 0.025		GB40128	GB40800	GB40800	GB41867		gene10134	gene11591	gene11591	gene11548		gene10155			gene10262	gene10449	gene10475	gene11172	gene11850	gene1334		gene119		gene4203	gene3438
		GB40134	GB40804	GB40804	GB41889		gene10145	gene11641	gene11641	gene11570		gene10158			gene10263	gene10470	gene10479	gene11183	gene11889	gene1354		gene11971		gene4260	gene3615
		GB40140	GB40823	GB40823	GB41975		gene1015	gene11649	gene11649	gene11621		gene10159			gene10264	gene10472	gene10483	gene11186	gene119	gene1377		gene1203		gene4393	gene3702
		GB40141	GB40857	GB40857	GB41983		gene10150	gene11657	gene11657	gene11735		gene10160			gene1028	gene10477	gene10486	gene11225	gene11958	gene1379		gene1211		gene4400	gene3898
		GB40142	GB40908	GB40908	GB42000		gene10154	gene11715	gene11715	gene11771		gene10162			gene10288	gene10493	gene10510	gene11246	gene1203	gene1476		gene12184		gene4404	gene393
		GB40145	GB40973	GB40973	GB42039		gene10155	gene1172	gene1172	gene11805		gene10173			gene10291	gene10511	gene10512	gene11288	gene1211	gene1499		gene12193		gene4497	gene3959
		GB40146	GB40980	GB40980	GB42079		gene10158	gene11743	gene11743	gene11841		gene10176			gene10296	gene10529	gene10515	gene11307	gene12136	gene1663		gene12284		gene4504	gene4127
		GB40147	GB41034	GB41034	GB42263		gene10159	gene11747	gene11747	gene1186		gene10178			gene103	gene10544	gene1053	gene1132	gene12193	gene1669		gene12286		gene4560	gene4396
		GB40148	GB41039	GB41039	GB42272		gene10160	gene11756	gene11756	gene11933		gene10184			gene1030	gene10545	gene10564	gene11347	gene12284	gene1719		gene1229		gene4677	gene442
		GB40150	GB41159	GB41159	GB42296		gene10162	gene11786	gene11786	gene11971		gene1019			gene10304	gene10551	gene10578	gene11350	gene1242	gene1807		gene1230		gene4879	gene4444
		GB40151	GB41188	GB41188	GB42311		gene10173	gene11840	gene11840	gene11987		gene10194			gene10311	gene10561	gene10585	gene11362	gene1294	gene1827		gene1242		gene4973	gene4517
		GB40155	GB41227	GB41227	GB42365		gene10176	gene11850	gene11850	gene12111		gene10197			gene10318	gene10562	gene10596	gene11368	gene1298	gene1846		gene1253		gene5323	gene4523
		GB40157	GB41262	GB41262	GB42411		gene10178	gene11889	gene11889	gene12184		gene10198			gene10323	gene10565	gene10630	gene11390	gene1332	gene1896		gene1294		gene5354	gene4590
		GB40158	GB41397	GB41397	GB42423		gene10184	gene119	gene119	gene12211		gene10199			gene10326	gene10605	gene10631	gene1140	gene1333	gene2084		gene1332		gene550	gene5188
		GB40159	GB41439	GB41439	GB42476		gene1019	gene11958	gene11958	gene12264		gene1020			gene10327	gene10613	gene10665	gene11420	gene1363	gene2111		gene1333		gene5555	gene5287
		GB40162	GB41517	GB41517	GB42477		gene10194	gene12015	gene12015	gene12286		gene10200			gene10328	gene10619	gene1068	gene11421	gene1375	gene2210		gene1379		gene5581	gene531
		GB40168	GB41533	GB41533	GB42478		gene10197	gene12023	gene12023	gene1229		gene10203			gene10332	gene10626	gene10684	gene11457	gene1391	gene2287		gene1391		gene5606	gene5310
		GB40169	GB41581	GB41581	GB42501		gene10198	gene1203	gene1203	gene1230		gene10205			gene10333	gene10633	gene10689	gene11478	gene1428	gene238		gene1476		gene5621	gene5343
		GB40203	GB41616	GB41616	GB42519		gene10199	gene1211	gene1211	gene1249		gene1021			gene10335	gene10649	gene10704	gene11481	gene1492	gene2386		gene1492		gene5716	gene5589
		GB40205	GB41648	GB41648	GB42651		gene1020	gene12136	gene12136	gene1253		gene10211			gene10341	gene10650	gene10706	gene11537	gene1503	gene2387		gene1663		gene5806	gene5674
		GB40206	GB41659	GB41659	GB42744		gene10200	gene12193	gene12193	gene1334		gene10217			gene10344	gene10661	gene10707	gene11548	gene1610	gene2396		gene1669		gene6558	gene587
		GB40207	GB41670	GB41670	GB42753		gene10203	gene12266	gene12266	gene1354		gene10224			gene10346	gene10685	gene10711	gene11551	gene1769	gene2431		gene1719		gene6698	gene6004
		GB40208	GB41725	GB41725	GB42828		gene10205	gene12284	gene12284	gene1377		gene10225			gene1035	gene10694	gene1073	gene11552	gene1772	gene2533		gene1769		gene6757	gene6012
		GB40217	GB41777	GB41777	GB42838		gene1021	gene1242	gene1242	gene1379		gene10226			gene10357	gene10699	gene10742	gene1157	gene180	gene2548		gene1772		gene6842	gene6149
		GB40225	GB41780	GB41780	GB42849		gene10211	gene1256	gene1256	gene1476		gene10227			gene10358	gene1070	gene10747	gene11570	gene1834	gene2720		gene180		gene6897	gene6389
		GB40227	GB41841	GB41841	GB42889		gene10217	gene1294	gene1294	gene1499		gene10228			gene10359	gene10702	gene10766	gene11588	gene1898	gene276		gene1807		gene7014	gene6398
		GB40229	GB41922	GB41922	GB42925		gene10224	gene1298	gene1298	gene1562		gene10230			gene1036	gene10731	gene10774	gene11641	gene210	gene278		gene1827		gene7050	gene6402
		GB40232	GB42084	GB42084	GB42957		gene10225	gene1332	gene1332	gene162		gene10232			gene10375	gene10746	gene10791	gene11649	gene2132	gene2822		gene1846		gene7280	gene6638
		GB40234	GB42089	GB42089	GB43004		gene10226	gene1333	gene1333	gene1663		gene10234			gene10382	gene10763	gene10806	gene11657	gene2193	gene2856		gene1896		gene7308	gene6896
		GB40237	GB42112	GB42112	GB43054		gene10227	gene1363	gene1363	gene1667		gene10235			gene10386	gene10767	gene10808	gene1172	gene2211	gene2873		gene1898		gene7474	gene7030
		GB40238	GB42142	GB42142	GB43093		gene10228	gene1375	gene1375	gene1669		gene10237			gene10391	gene10770	gene10858	gene11743	gene2226	gene2885		gene210		gene7959	gene710
		GB40239	GB42224	GB42224	GB43112		gene10230	gene1391	gene1391	gene1719		gene10239			gene10402	gene10771	gene10884	gene11747	gene2231	gene2934		gene2111		gene8010	gene7116
		GB40240	GB42237	GB42237	GB43123		gene10232	gene1426	gene1426	gene1807		gene10244			gene10403	gene10775	gene10888	gene11756	gene2263	gene3049		gene2132		gene8224	gene7199
		GB40251	GB42351	GB42351	GB43168		gene10234	gene1428	gene1428	gene1809		gene10249			gene10406	gene10781	gene10896	gene11786	gene2293	gene3060		gene2193		gene8359	gene7241
		GB40259	GB42382	GB42382	GB43247		gene10235	gene1459	gene1459	gene1827		gene1025			gene10407	gene10783	gene109	gene11805	gene2411	gene3068		gene2210		gene8366	gene7404
		GB40261	GB42409	GB42409	GB43270		gene10237	gene1492	gene1492	gene1846		gene10253			gene10408	gene10799	gene10902	gene11840	gene2449	gene3150		gene2211		gene8413	gene7463
		GB40263	GB42540	GB42540	GB43315		gene10239	gene1503	gene1503	gene1896		gene10257			gene10413	gene10804	gene10916	gene11850	gene2466	gene3202		gene2226		gene8534	gene7670
		GB40265	GB42661	GB42661	GB43463		gene10244	gene1610	gene1610	gene2084		gene10258			gene10421	gene10813	gene1092	gene1186	gene2512	gene3222		gene2263		gene8599	gene7701
		GB40267	GB42679	GB42679	GB43554		gene10249	gene1769	gene1769	gene2111		gene1026			gene10425	gene10814	gene10922	gene11889	gene2605	gene3246		gene2293		gene8933	gene7756
		GB40269	GB42728	GB42728	GB43569		gene1025	gene1772	gene1772	gene2165		gene10262			gene10427	gene10816	gene10927	gene119	gene2621	gene328		gene238		gene9016	gene7786
		GB40270	GB42738	GB42738	GB43580		gene10253	gene180	gene180	gene2168		gene10263			gene10433	gene10817	gene10958	gene11933	gene2660	gene3306		gene2386		gene9114	gene8095
		GB40271	GB42741	GB42741	GB43581		gene10256	gene1801	gene1801	gene2210		gene10264			gene10435	gene10826	gene10959	gene11958	gene2709	gene3348		gene2387		gene9201	gene8259
		GB40274	GB42742	GB42742	GB43728		gene10257	gene1834	gene1834	gene2287		gene10266			gene1044	gene10828	gene10981	gene11971	gene2723	gene3416		gene2396		gene9294	gene8678
		GB40278	GB42780	GB42780	GB43734		gene10258	gene1898	gene1898	gene2288		gene1027			gene10441	gene10840	gene10984	gene11987	gene2752	gene3444		gene2411		gene9563	gene8685
		GB40280	GB42785	GB42785	GB43742		gene1026	gene210	gene210	gene238		gene10271			gene10447	gene10856	gene10989	gene1203	gene2898	gene3481		gene2466		gene9849	gene8706
		GB40282	GB42809	GB42809	GB43772		gene10261	gene2132	gene2132	gene2386		gene10272			gene10449	gene10865	gene10992	gene1211	gene2903	gene3491		gene2512		gene9962	gene8761
		GB40283	GB42817	GB42817	GB43784		gene10262	gene2193	gene2193	gene2387		gene1028			gene10452	gene10868	gene10993	gene12111	gene2909	gene3562		gene2533			gene8862
		GB40284	GB42840	GB42840	GB43823		gene10263	gene2211	gene2211	gene2396		gene10281			gene10463	gene10879	gene11012	gene12136	gene2922	gene363		gene2605			gene895
		GB40289	GB42960	GB42960	GB43839		gene10264	gene2226	gene2226	gene2431		gene10282			gene10470	gene10889	gene11018	gene12184	gene2932	gene3678		gene2621			gene897
		GB40296	GB42984	GB42984	GB43847		gene10266	gene2231	gene2231	gene2440		gene10283			gene10472	gene10900	gene11032	gene12193	gene2975	gene3681		gene2720			gene9027
		GB40299	GB42985	GB42985	GB43848		gene1027	gene2252	gene2252	gene2533		gene10288			gene10475	gene10905	gene11035	gene12264	gene300	gene376		gene2723			gene9467
		GB40301	GB43084	GB43084	GB43884		gene10271	gene2257	gene2257	gene2548		gene10290			gene10477	gene10906	gene11046	gene12284	gene3024	gene385		gene2752			gene9469
		GB40302	GB43111	GB43111	GB43914		gene10272	gene2263	gene2263	gene2720		gene10291			gene10479	gene10907	gene11049	gene12286	gene3038	gene389		gene2822			gene989
		GB40303	GB43114	GB43114	GB43953		gene1028	gene2293	gene2293	gene276		gene10293			gene10483	gene1091	gene11057	gene1229	gene3113	gene3951		gene2856			gene992
		GB40304	GB43115	GB43115	GB44010		gene10281	gene2411	gene2411	gene278		gene10296			gene10486	gene10929	gene1107	gene1230	gene3201	gene3988		gene2873
		GB40305	GB43116	GB43116	GB44056		gene10282	gene2449	gene2449	gene2822		gene10298			gene10493	gene10930	gene11080	gene1242	gene3438	gene4013		gene2898
		GB40307	GB43165	GB43165	GB44084		gene10283	gene2466	gene2466	gene2825		gene103			gene10510	gene10934	gene11086	gene1253	gene3442	gene4017		gene2922
		GB40308	GB43171	GB43171	GB44158		gene10288	gene2512	gene2512	gene2856		gene1030			gene10511	gene10940	gene11088	gene1294	gene347	gene4025		gene2932
		GB40309	GB43189	GB43189	GB44225		gene10290	gene2605	gene2605	gene2873		gene10304			gene10512	gene10956	gene11098	gene1298	gene3475	gene4056		gene2934
		GB40310	GB43210	GB43210	GB44339		gene10291	gene2621	gene2621	gene2885		gene10305			gene10515	gene10960	gene11105	gene1332	gene3612	gene4068		gene300
		GB40312	GB43304	GB43304	GB44356		gene10293	gene2660	gene2660	gene2895		gene10311			gene10529	gene10962	gene11106	gene1333	gene3615	gene4131		gene3068
		GB40319	GB43353	GB43353	GB44411		gene10296	gene2709	gene2709	gene2934		gene10315			gene1053	gene10980	gene11116	gene1334	gene3702	gene4180		gene3202
		GB40320	GB43362	GB43362	GB44414		gene10298	gene2723	gene2723	gene3049		gene10318			gene10544	gene11002	gene11131	gene1354	gene3720	gene4189		gene328
		GB40336	GB43548	GB43548	GB44416		gene103	gene2752	gene2752	gene3060		gene10323			gene10545	gene11004	gene1117	gene1363	gene3772	gene4203		gene3306
		GB40337	GB43564	GB43564	GB44452		gene1030	gene2898	gene2898	gene3068		gene10325			gene10551	gene11007	gene11181	gene1375	gene3864	gene426		gene3348
		GB40338	GB43713	GB43713	GB44455		gene10304	gene2903	gene2903	gene3150		gene10326			gene10561	gene11013	gene11192	gene1377	gene3872	gene4260		gene3416
		GB40340	GB43738	GB43738	GB44469		gene10305	gene2909	gene2909	gene3202		gene10327			gene10562	gene11014	gene11202	gene1379	gene3898	gene4296		gene3438
		GB40342	GB43743	GB43743	GB44503		gene10311	gene2922	gene2922	gene3222		gene10328			gene10564	gene11017	gene11205	gene1391	gene393	gene4393		gene3442
		GB40343	GB43824	GB43824	GB44508		gene10315	gene2932	gene2932	gene3246		gene10332			gene10565	gene11028	gene11206	gene1428	gene3942	gene4400		gene3444
		GB40348	GB43840	GB43840	GB44514		gene10318	gene2975	gene2975	gene328		gene10333			gene10578	gene1103	gene11211	gene1476	gene3959	gene4404		gene347
		GB40349	GB43844	GB43844	GB44557		gene10322	gene300	gene300	gene3304		gene10335			gene10585	gene11031	gene1123	gene1492	gene3995	gene4475		gene3475
		GB40350	GB43861	GB43861	GB44580		gene10323	gene3024	gene3024	gene3306		gene10341			gene10596	gene1104	gene11230	gene1499	gene4091	gene4497		gene3481
		GB40356	GB43877	GB43877	GB44585		gene10325	gene3038	gene3038	gene3308		gene10342			gene10605	gene11044	gene11236	gene1503	gene4127	gene4504		gene3562
		GB40357	GB43921	GB43921	GB44608		gene10326	gene3082	gene3082	gene3348		gene10344			gene10613	gene1105	gene11245	gene1610	gene4134	gene4515		gene3615
		GB40358	GB43980	GB43980	GB44634		gene10327	gene3113	gene3113	gene3416		gene10346			gene10619	gene11091	gene11255	gene1663	gene4239	gene4560		gene363
		GB40359	GB44064	GB44064	GB44640		gene10328	gene3145	gene3145	gene3444		gene1035			gene10626	gene11115	gene1126	gene1669	gene4348	gene4584		gene3678
		GB40360	GB44096	GB44096	GB44659		gene10332	gene3171	gene3171	gene3481		gene10352			gene10630	gene11119	gene11263	gene1719	gene4395	gene4593		gene3681
		GB40361	GB44119	GB44119	GB44660		gene10333	gene3201	gene3201	gene3491		gene10357			gene10631	gene11128	gene11265	gene1769	gene4396	gene4634		gene3702
		GB40362	GB44121	GB44121	GB44683		gene10335	gene3438	gene3438	gene3534		gene10358			gene10633	gene11129	gene11272	gene1772	gene442	gene4666		gene3720
		GB40363	GB44174	GB44174	GB44765		gene10341	gene3442	gene3442	gene3562		gene10359			gene10649	gene11130	gene11284	gene180	gene4444	gene4677		gene389
		GB40364	GB44192	GB44192	GB44774		gene10342	gene347	gene347	gene363		gene1036			gene10650	gene11132	gene11301	gene1807	gene448	gene4799		gene3898
		GB40365	GB44208	GB44208	GB44841		gene10344	gene3475	gene3475	gene3678		gene10362			gene10661	gene11136	gene1132	gene1827	gene4517	gene4861		gene393
		GB40377	GB44222	GB44222	GB44925		gene10346	gene3492	gene3492	gene3681		gene10367			gene10665	gene11146	gene11330	gene1834	gene4523	gene4876		gene3959
		GB40385	GB44233	GB44233	GB44944		gene1035	gene3612	gene3612	gene376		gene10368			gene1068	gene11151	gene11341	gene1846	gene4578	gene4879		gene4017
		GB40386	GB44297	GB44297	GB44967		gene10352	gene3615	gene3615	gene385		gene10375			gene10684	gene11153	gene11350	gene1896	gene4590	gene4963		gene4056
		GB40387	GB44316	GB44316	GB44970		gene10357	gene3702	gene3702	gene389		gene10377			gene10685	gene11158	gene11358	gene1898	gene4622	gene4973		gene4068
		GB40388	GB44344	GB44344	GB44988		gene10358	gene3720	gene3720	gene3951		gene10381			gene10689	gene11168	gene1136	gene2084	gene4842	gene5243		gene4127
		GB40391	GB44351	GB44351	GB45040		gene10359	gene3772	gene3772	gene3988		gene10382			gene10694	gene11183	gene11363	gene210	gene4847	gene5323		gene4131
		GB40392	GB44412	GB44412	GB45070		gene1036	gene3860	gene3860	gene4013		gene10386			gene10699	gene11200	gene11389	gene2111	gene4875	gene5345		gene4180
		GB40397	GB44485	GB44485	GB45159		gene10362	gene3864	gene3864	gene4017		gene10388			gene1070	gene11213	gene11401	gene2132	gene4891	gene5354		gene4189
		GB40398	GB44492	GB44492	GB45248		gene10367	gene3872	gene3872	gene4025		gene10391			gene10702	gene11216	gene11418	gene2193	gene4912	gene550		gene4203
		GB40405	GB44523	GB44523	GB45365		gene10368	gene3898	gene3898	gene4056		gene10402			gene10704	gene11218	gene11420	gene2210	gene4929	gene5521		gene4239
		GB40407	GB44533	GB44533	GB45377		gene10375	gene3901	gene3901	gene4068		gene10403			gene10706	gene11246	gene11421	gene2211	gene5016	gene5555		gene426
		GB40409	GB44548	GB44548	GB45400		gene10377	gene393	gene393	gene4131		gene10406			gene10707	gene1125	gene11461	gene2226	gene5061	gene5560		gene4260
		GB40410	GB44564	GB44564	GB45421		gene10381	gene3942	gene3942	gene4180		gene10407			gene10711	gene11267	gene11462	gene2231	gene5188	gene5581		gene4296
		GB40411	GB44626	GB44626	GB45427		gene10382	gene3959	gene3959	gene4189		gene10408			gene1073	gene11270	gene11465	gene2263	gene5237	gene5584		gene4393
		GB40412	GB44672	GB44672	GB45435		gene10386	gene3977	gene3977	gene4203		gene10409			gene10731	gene11278	gene11472	gene2287	gene5264	gene5606		gene4396
		GB40414	GB44678	GB44678	GB45437		gene10388	gene3978	gene3978	gene426		gene10411			gene10742	gene11286	gene1149	gene2293	gene5287	gene5621		gene4400
		GB40415	GB44705	GB44705	GB45454		gene10391	gene3995	gene3995	gene4260		gene10412			gene10746	gene11288	gene11519	gene238	gene531	gene5716		gene4404
		GB40420	GB44722	GB44722	GB45456		gene10394	gene4091	gene4091	gene4296		gene10413			gene10747	gene11293	gene11543	gene2386	gene5310	gene5806		gene442
		GB40422	GB44723	GB44723	GB45495		gene10402	gene4127	gene4127	gene4393		gene10418			gene10763	gene11297	gene11555	gene2387	gene5343	gene5813		gene4444
		GB40423	GB44744	GB44744	GB45565		gene10403	gene4134	gene4134	gene4400		gene10420			gene10766	gene11307	gene1157	gene2396	gene5403	gene5932		gene4497
		GB40425	GB44771	GB44771	GB45568		gene10406	gene4194	gene4194	gene4404		gene10421			gene10767	gene11313	gene11570	gene2411	gene5428	gene6048		gene4504
		GB40426	GB44772	GB44772	GB45675		gene10407	gene4239	gene4239	gene4436		gene10425			gene10770	gene11317	gene11574	gene2431	gene5439	gene6062		gene4517
		GB40427	GB44791	GB44791	GB45682		gene10408	gene4311	gene4311	gene4475		gene10427			gene10771	gene11318	gene11579	gene2449	gene550	gene6087		gene4523
		GB40428	GB44826	GB44826	GB45696		gene10409	gene4348	gene4348	gene4497		gene10430			gene10774	gene11333	gene11583	gene2466	gene5526	gene6088		gene4560
		GB40431	GB44983	GB44983	GB45701		gene10411	gene4395	gene4395	gene4504		gene10432			gene10775	gene11336	gene11588	gene2512	gene5589	gene615		gene4584
		GB40434	GB45114	GB45114	GB45717		gene10412	gene4396	gene4396	gene4515		gene10433			gene10781	gene11338	gene11632	gene2533	gene5590	gene6185		gene4590
		GB40436	GB45156	GB45156	GB45758		gene10413	gene442	gene442	gene4554		gene10435			gene10783	gene1134	gene11648	gene2548	gene5617	gene6191		gene4677
		GB40437	GB45179	GB45179	GB45777		gene10418	gene4444	gene4444	gene4560		gene1044			gene10791	gene11344	gene11649	gene2605	gene5639	gene6217		gene4879
		GB40438	GB45210	GB45210	GB45851		gene10420	gene4455	gene4455	gene4584		gene10440			gene10799	gene11345	gene11654	gene2621	gene5672	gene6558		gene4973
		GB40439	GB45211	GB45211	GB45853		gene10421	gene448	gene448	gene4593		gene10441			gene10804	gene11352	gene11657	gene2660	gene5674	gene6681		gene5188
		GB40442	GB45213	GB45213	GB45876		gene10425	gene4484	gene4484	gene4634		gene10447			gene10806	gene11353	gene11674	gene2709	gene5709	gene6698		gene5287
		GB40444	GB45235	GB45235	GB45906		gene10427	gene4517	gene4517	gene4666		gene10449			gene10808	gene11364	gene11682	gene2720	gene5823	gene6757		gene531
		GB40446	GB45340	GB45340	GB45909		gene1043	gene452	gene452	gene4677		gene1045			gene10813	gene11367	gene11689	gene2723	gene5854	gene6798		gene5310
		GB40448	GB45375	GB45375	GB45913		gene10430	gene4523	gene4523	gene4782		gene10452			gene10814	gene11382	gene11696	gene2752	gene587	gene6802		gene5323
		GB40451	GB45382	GB45382	GB45945		gene10432	gene4530	gene4530	gene4799		gene10453			gene10816	gene11386	gene1170	gene276	gene5954	gene6842		gene5343
		GB40452	GB45432	GB45432	GB45950		gene10433	gene4578	gene4578	gene4861		gene10454			gene10817	gene1140	gene11702	gene278	gene6004	gene6897		gene5354
		GB40453	GB45515	GB45515	GB45973		gene10435	gene4590	gene4590	gene4876		gene10463			gene10826	gene11405	gene11709	gene2822	gene6012	gene6930		gene550
		GB40454	GB45591	GB45591	GB46008		gene1044	gene4622	gene4622	gene4879		gene10468			gene10828	gene11457	gene11712	gene2856	gene6121	gene6996		gene5555
		GB40456	GB45624	GB45624	GB46013		gene10440	gene4806	gene4806	gene4963		gene10469			gene10840	gene11460	gene11717	gene2873	gene6140	gene7001		gene5581
		GB40459	GB45628	GB45628	GB46022		gene10441	gene4842	gene4842	gene4973		gene1047			gene10856	gene11473	gene11743	gene2885	gene6149	gene7014		gene5589
		GB40460	GB45724	GB45724	GB46045		gene10447	gene4847	gene4847	gene4984		gene10470			gene10858	gene11481	gene11744	gene2898	gene6150	gene7050		gene5606
		GB40461	GB45741	GB45741	GB46057		gene10449	gene4875	gene4875	gene505		gene10472			gene10865	gene11497	gene11747	gene2903	gene618	gene7098		gene5621
		GB40463	GB45760	GB45760	GB46076		gene1045	gene4891	gene4891	gene5243		gene10475			gene10868	gene11529	gene11784	gene2909	gene6380	gene7193		gene5674
		GB40466	GB45796	GB45796	GB46146		gene10452	gene4912	gene4912	gene5314		gene10477			gene10879	gene11539	gene11793	gene2922	gene6389	gene7227		gene5716
		GB40467	GB45813	GB45813	GB46169		gene10453	gene4929	gene4929	gene5323		gene10478			gene10884	gene1156	gene11804	gene2932	gene6398	gene7280		gene5806
		GB40473	GB45818	GB45818	GB46178		gene10454	gene5016	gene5016	gene5345		gene10479			gene10888	gene11561	gene11831	gene2934	gene6402	gene7308		gene5813
		GB40478	GB45850	GB45850	GB46276		gene10463	gene5061	gene5061	gene5354		gene1048			gene10889	gene11565	gene11850	gene2975	gene6403	gene733		gene5823
		GB40479	GB45955	GB45955	GB46277		gene10468	gene5188	gene5188	gene550		gene10483			gene10896	gene11568	gene1186	gene300	gene6515	gene7474		gene587
		GB40480	GB45972	GB45972	GB46300		gene10469	gene5237	gene5237	gene5521		gene10486			gene109	gene1158	gene11887	gene3024	gene6559	gene7840		gene6004
		GB40483	GB46066	GB46066	GB46302		gene1047	gene5264	gene5264	gene5555		gene10492			gene10900	gene1159	gene11888	gene3038	gene6638	gene7959		gene6012
		GB40489	GB46091	GB46091	GB46306		gene10470	gene5287	gene5287	gene5560		gene10493			gene10902	gene11604	gene11897	gene3049	gene6694	gene7999		gene6048
		GB40490	GB46145	GB46145	GB46318		gene10472	gene531	gene531	gene5573		gene10495			gene10905	gene11610	gene119	gene3060	gene6752	gene8010		gene6087
		GB40491	GB46226	GB46226	GB46347		gene10475	gene5310	gene5310	gene5581		gene10510			gene10906	gene11613	gene11910	gene3068	gene6896	gene8043		gene6149
		GB40496	GB46227	GB46227	GB46408		gene10477	gene5343	gene5343	gene5584		gene10511			gene10907	gene11622	gene11915	gene3113	gene6926	gene8121		gene615
		GB40498	GB46230	GB46230	GB46422		gene10478	gene538	gene538	gene5606		gene10512			gene1091	gene11628	gene11926	gene3150	gene6931	gene8128		gene6389
		GB40500	GB46249	GB46249	GB46503		gene10479	gene5403	gene5403	gene5621		gene10513			gene10916	gene11629	gene11934	gene3201	gene6937	gene8157		gene6398
		GB40504	GB46309	GB46309	GB46569		gene1048	gene5428	gene5428	gene5716		gene10515			gene1092	gene11637	gene11939	gene3202	gene6942	gene8224		gene6402
		GB40507	GB46337	GB46337	GB46635		gene10483	gene5439	gene5439	gene5806		gene10529			gene10922	gene11660	gene11952	gene3222	gene6944	gene8248		gene6558
		GB40509	GB46388	GB46388	GB46642		gene10486	gene5449	gene5449	gene5813		gene1053			gene10927	gene11676	gene11969	gene3246	gene7030	gene825		gene6638
		GB40510	GB46653	GB46653	GB46697		gene10492	gene5453	gene5453	gene5853		gene10539			gene10929	gene11695	gene11981	gene328	gene7031	gene8328		gene6681
		GB40511	GB46741	GB46741	GB46763		gene10493	gene550	gene550	gene5932		gene10544			gene10930	gene11733	gene11982	gene3306	gene7082	gene8359		gene6698
		GB40513	GB46767	GB46767	GB46774		gene10495	gene5526	gene5526	gene6047		gene10545			gene10934	gene11755	gene11994	gene3348	gene7098	gene8366		gene6757
		GB40515	GB46832	GB46832	GB46902		gene10510	gene5589	gene5589	gene6048		gene10546			gene10940	gene11782	gene1200	gene3416	gene710	gene8413		gene6802
		GB40517	GB46853	GB46853	GB47026		gene10511	gene5590	gene5590	gene6062		gene10551			gene10956	gene11789	gene12005	gene3438	gene7116	gene8511		gene6842
		GB40519	GB46895	GB46895	GB47029		gene10512	gene5617	gene5617	gene6087		gene10552			gene10958	gene1180	gene1202	gene3442	gene7199	gene8520		gene6896
		GB40531	GB46985	GB46985	GB47049		gene10513	gene5639	gene5639	gene6088		gene10558			gene10959	gene11817	gene1203	gene3444	gene7221	gene8534		gene6897
		GB40534	GB47046	GB47046	GB47069		gene10515	gene5672	gene5672	gene615		gene10559			gene10960	gene11818	gene12062	gene347	gene7241	gene8599		gene6926
		GB40537	GB47076	GB47076	GB47079		gene10529	gene5674	gene5674	gene6185		gene1056			gene10962	gene11820	gene12066	gene3475	gene7306	gene8933		gene7014
		GB40538	GB47114	GB47114	GB47105		gene1053	gene5705	gene5705	gene6191		gene10560			gene10980	gene11821	gene1210	gene3481	gene7316	gene9016		gene7030
		GB40541	GB47140	GB47140	GB47136		gene10539	gene5709	gene5709	gene6217		gene10561			gene10981	gene11826	gene12126	gene3491	gene7332	gene9054		gene7050
		GB40543	GB47188	GB47188	GB47141		gene10544	gene5823	gene5823	gene6441		gene10562			gene10984	gene11846	gene12135	gene3562	gene7368	gene9114		gene7082
		GB40545	GB47315	GB47315	GB47142		gene10545	gene5854	gene5854	gene6558		gene10564			gene10989	gene11852	gene12150	gene3612	gene7375	gene914		gene710
		GB40554	GB47342	GB47342	GB47180		gene10546	gene587	gene587	gene6647		gene10565			gene10992	gene11853	gene12157	gene3615	gene7404	gene9195		gene7116
		GB40555	GB47415	GB47415	GB47224		gene10551	gene5954	gene5954	gene6681		gene10566			gene10993	gene11854	gene12182	gene363	gene7421	gene9201		gene7199
		GB40556	GB47458	GB47458	GB47278		gene10552	gene6004	gene6004	gene6696		gene10567			gene11002	gene11855	gene12184	gene3678	gene7459	gene9233		gene7241
		GB40559	GB47477	GB47477	GB47318		gene10553	gene6012	gene6012	gene6698		gene10568			gene11004	gene11857	gene1219	gene3681	gene7463	gene9294		gene7280
		GB40560	GB47482	GB47482	GB47380		gene10558	gene6121	gene6121	gene6757		gene10572			gene11007	gene11892	gene12193	gene3702	gene7539	gene9395		gene7308
		GB40561	GB47538	GB47538	GB47382		gene10559	gene6140	gene6140	gene6798		gene10573			gene11012	gene11893	gene1220	gene3720	gene7670	gene9456		gene7316
		GB40562	GB47540	GB47540	GB47407		gene1056	gene6149	gene6149	gene6802		gene10578			gene11013	gene11899	gene12207	gene376	gene7701	gene9563		gene7404
		GB40563	GB47565	GB47565	GB47414		gene10560	gene6150	gene6150	gene6842		gene1058			gene11014	gene1192	gene1228	gene3772	gene7756	gene9707		gene7421
		GB40564	GB47590	GB47590	GB47475		gene10561	gene618	gene618	gene6897		gene10584			gene11017	gene11931	gene12284	gene385	gene7786	gene9849		gene7463
		GB40565	GB47649	GB47649	GB47486		gene10562	gene6318	gene6318	gene6930		gene10585			gene11018	gene11936	gene1229	gene3864	gene7930	gene991		gene7474
		GB40566	GB47669	GB47669	GB47495		gene10563	gene6380	gene6380	gene6981		gene10586			gene11028	gene11942	gene12313	gene3872	gene7956	gene9962		gene7670
		GB40567	GB47670	GB47670	GB47503		gene10564	gene6389	gene6389	gene6996		gene10591			gene1103	gene11954	gene12318	gene389	gene8012			gene7701
		GB40574	GB47696	GB47696	GB47504		gene10565	gene6390	gene6390	gene7001		gene10594			gene11031	gene11971	gene1242	gene3898	gene8095			gene7756
		GB40576	GB47723	GB47723	GB47528		gene10566	gene6398	gene6398	gene7014		gene10596			gene11032	gene12022	gene1250	gene393	gene8159			gene7786
		GB40577	GB47767	GB47767	GB47545		gene10567	gene6402	gene6402	gene7037		gene10597			gene11035	gene1205	gene1253	gene3942	gene8259			gene7840
		GB40578	GB48022	GB48022	GB47546		gene10568	gene6403	gene6403	gene7050		gene10598			gene1104	gene12057	gene1255	gene3951	gene8308			gene7930
		GB40580	GB48075	GB48075	GB47563		gene10572	gene6453	gene6453	gene7098		gene10599			gene11044	gene12059	gene1261	gene3959	gene8459			gene7956
		GB40589	GB48192	GB48192	GB47588		gene10573	gene6512	gene6512	gene7193		gene1060			gene11046	gene12063	gene1294	gene3988	gene8551			gene7959
		GB40592	GB48193	GB48193	GB47601		gene10578	gene6515	gene6515	gene7227		gene10602			gene11049	gene1209	gene131	gene3995	gene8589			gene7999
		GB40594	GB48241	GB48241	GB47737		gene1058	gene6546	gene6546	gene7233		gene10603			gene1105	gene1211	gene1313	gene4013	gene8678			gene8010
		GB40596	GB48256	GB48256	GB47781		gene10584	gene6559	gene6559	gene7280		gene10604			gene11057	gene12131	gene1333	gene4017	gene8685			gene8043
		GB40598	GB48271	GB48271	GB47805		gene10585	gene6638	gene6638	gene7308		gene10605			gene1107	gene12132	gene1352	gene4025	gene8706			gene8095
		GB40599	GB48412	GB48412	GB47847		gene10586	gene6662	gene6662	gene733		gene10610			gene11080	gene1216	gene1391	gene4056	gene8710			gene8224
		GB40600	GB48435	GB48435	GB47934		gene10591	gene6694	gene6694	gene7474		gene10613			gene11086	gene12161	gene1395	gene4068	gene8751			gene8248
		GB40603	GB48436	GB48436	GB47943		gene10594	gene6752	gene6752	gene7566		gene10619			gene11088	gene12174	gene1398	gene4091	gene8761			gene8259
		GB40609	GB48671	GB48671	GB47975		gene10596	gene6896	gene6896	gene7840		gene10620			gene11091	gene12177	gene1407	gene4127	gene8824			gene8328
		GB40610	GB48768	GB48768	GB48041		gene10597	gene6926	gene6926	gene7959		gene10626			gene11098	gene12202	gene1416	gene4131	gene8862			gene8359
		GB40614	GB48788	GB48788	GB48062		gene10598	gene6931	gene6931	gene7999		gene10628			gene11105	gene12205	gene1418	gene4134	gene895			gene8366
		GB40615	GB48881	GB48881	GB48101		gene10599	gene6937	gene6937	gene8010		gene10630			gene11106	gene12208	gene143	gene4180	gene897			gene8413
		GB40616	GB48943	GB48943	GB48105		gene1060	gene6942	gene6942	gene8043		gene10631			gene11115	gene12209	gene1438	gene4189	gene9027			gene8459
		GB40619	GB48961	GB48961	GB48122		gene10602	gene6944	gene6944	gene8121		gene10633			gene11116	gene12210	gene1465	gene4203	gene9104			gene8511
		GB40624	GB49000	GB49000	GB48189		gene10603	gene7030	gene7030	gene8128		gene10636			gene11119	gene12223	gene1475	gene4239	gene9145			gene8534
		GB40626	GB49033	GB49033	GB48201		gene10604	gene7031	gene7031	gene8157		gene10639			gene11128	gene12234	gene1491	gene426	gene9167			gene8551
		GB40629	GB49071	GB49071	GB48215		gene10605	gene7082	gene7082	gene8224		gene10644			gene11129	gene1224	gene1492	gene4260	gene9210			gene8599
		GB40635	GB49079	GB49079	GB48275		gene10610	gene7098	gene7098	gene824		gene10649			gene11130	gene12248	gene15	gene4296	gene9235			gene8678
		GB40648	GB49111	GB49111	GB48311		gene10613	gene710	gene710	gene8248		gene10650			gene11131	gene1225	gene1501	gene4348	gene9257			gene8685
		GB40652	GB49154	GB49154	GB48344		gene10619	gene7116	gene7116	gene825		gene10652			gene11132	gene12286	gene1538	gene4393	gene9276			gene8706
		GB40653	GB49157	GB49157	GB48419		gene10620	gene7199	gene7199	gene8328		gene10654			gene11136	gene1230	gene1547	gene4395	gene9317			gene8761
		GB40654	GB49189	GB49189	GB48444		gene10626	gene7221	gene7221	gene8359		gene10656			gene11146	gene12312	gene1556	gene4396	gene9403			gene8862
		GB40656	GB49235	GB49235	GB48462		gene10628	gene7241	gene7241	gene8366		gene10661			gene11151	gene1236	gene1560	gene4400	gene9442			gene8933
		GB40657	GB49275	GB49275	GB48577		gene10630	gene7294	gene7294	gene8413		gene10665			gene11153	gene1258	gene1563	gene4404	gene9467			gene895
		GB40670	GB49290	GB49290	GB48653		gene10631	gene7306	gene7306	gene8448		gene10669			gene11158	gene1269	gene1567	gene442	gene9469			gene897
		GB40671	GB49309	GB49309	GB48721		gene10633	gene7316	gene7316	gene8511		gene10672			gene11168	gene127	gene1568	gene4444	gene9470			gene9016
		GB40672	GB49382	GB49382	GB48794		gene10636	gene7332	gene7332	gene8520		gene10675			gene1117	gene1272	gene1585	gene4475	gene954			gene9027
		GB40673	GB49397	GB49397	GB48833		gene10637	gene7363	gene7363	gene8534		gene10676			gene11181	gene1282	gene1586	gene448	gene9561			gene9114
		GB40674	GB49438	GB49438	GB48905		gene10639	gene7368	gene7368	gene857		gene10679			gene11183	gene1283	gene1630	gene4497	gene9596			gene9145
		GB40678	GB49440	GB49440	GB48923		gene10644	gene7375	gene7375	gene8599		gene1068			gene11192	gene1308	gene1639	gene4504	gene9887			gene9167
		GB40681	GB49449	GB49449	GB48938		gene10649	gene7404	gene7404	gene8657		gene10680			gene11200	gene1317	gene164	gene4515	gene989			gene9201
		GB40684	GB49463	GB49463	GB48955		gene10650	gene7412	gene7412	gene8659		gene10682			gene11202	gene1320	gene1677	gene4517	gene992			gene9257
		GB40690	GB49476	GB49476	GB48981		gene10652	gene7421	gene7421	gene8933		gene10684			gene11205	gene1321	gene1683	gene4523	gene9941			gene9276
		GB40691	GB49485	GB49485	GB49040		gene10654	gene7428	gene7428	gene9016		gene10685			gene11206	gene1332	gene1703	gene4560				gene9294
		GB40694	GB49568	GB49568	GB49085		gene10656	gene7459	gene7459	gene9054		gene10689			gene11211	gene1364	gene1709	gene4578				gene9467
		GB40700	GB49582	GB49582	GB49180		gene10657	gene7463	gene7463	gene9114		gene10694			gene11213	gene1367	gene171	gene4584				gene9469
		GB40701	GB49605	GB49605	GB49192		gene10661	gene7538	gene7538	gene914		gene10699			gene11216	gene1379	gene1719	gene4590				gene9563
		GB40703	GB49614	GB49614	GB49240		gene10665	gene7539	gene7539	gene9195		gene1070			gene11218	gene1387	gene1721	gene4593				gene9849
		GB40705	GB49627	GB49627	GB49284		gene10669	gene7670	gene7670	gene9201		gene10702			gene1123	gene140	gene1724	gene4622				gene989
		GB40706	GB49706	GB49706	GB49321		gene10672	gene7701	gene7701	gene9233		gene10704			gene11230	gene1406	gene1741	gene4634				gene992
		GB40708	GB49708	GB49708	GB49339		gene10675	gene7756	gene7756	gene9294		gene10706			gene11236	gene1408	gene1748	gene4666				gene9962
		GB40711	GB49728	GB49728	GB49368		gene10676	gene7786	gene7786	gene9395		gene10707			gene11245	gene1412	gene1760	gene4677
		GB40713	GB49768	GB49768	GB49475		gene10679	gene79	gene79	gene9456		gene10708			gene11246	gene1425	gene1770	gene4799
		GB40718	GB49837	GB49837	GB49488		gene1068	gene7929	gene7929	gene9563		gene10711			gene1125	gene1437	gene1772	gene4842
		GB40720	GB49869	GB49869	GB49514		gene10680	gene7930	gene7930	gene9656		gene10712			gene11255	gene1442	gene1784	gene4847
		GB40723	GB49885	GB49885	GB49518		gene10682	gene7956	gene7956	gene9707		gene1073			gene1126	gene1458	gene180	gene4861
		GB40732	GB49936	GB49936	GB49538		gene10684	gene7987	gene7987	gene9709		gene10730			gene11263	gene1464	gene1803	gene4875
		GB40733	GB49973	GB49973	GB49551		gene10685	gene8012	gene8012	gene9849		gene10731			gene11265	gene1470	gene1824	gene4876
		GB40734	GB49994	GB49994	GB49552		gene10689	gene8095	gene8095	gene991		gene10740			gene11267	gene1474	gene1827	gene4879
		GB40735	GB49999	GB49999	GB49564		gene10694	gene8139	gene8139	gene9951		gene10742			gene11270	gene1476	gene1832	gene4891
		GB40741	GB50012	GB50012	GB49571		gene10699	gene8159	gene8159	gene9962		gene10745			gene11272	gene1479	gene1833	gene4912
		GB40744	GB50013	GB50013	GB49650		gene1070	gene8218	gene8218			gene10746			gene11278	gene1500	gene1846	gene4929
		GB40745	GB50039	GB50039	GB49651		gene10702	gene8229	gene8229			gene10747			gene11284	gene1502	gene1853	gene4963
		GB40746	GB50048	GB50048	GB49688		gene10704	gene8259	gene8259			gene10748			gene11286	gene151	gene1859	gene4973
		GB40747	GB50080	GB50080	GB49714		gene10706	gene8308	gene8308			gene1075			gene11288	gene1550	gene1867	gene5016
		GB40748	GB50121	GB50121	GB49784		gene10707	gene8459	gene8459			gene10762			gene11293	gene1555	gene1896	gene5061
		GB40750	GB50156	GB50156	GB49785		gene10708	gene8486	gene8486			gene10763			gene11297	gene1583	gene1898	gene5188
		GB40751	GB50158	GB50158	GB49801		gene10711	gene8551	gene8551			gene10766			gene11301	gene1593	gene196	gene5237
		GB40759	GB50189	GB50189	GB49870		gene10712	gene8589	gene8589			gene10767			gene11307	gene1594	gene2	gene5243
		GB40760	GB50206	GB50206	GB49888		gene1073	gene8678	gene8678			gene10770			gene11313	gene160	gene2007	gene5264
		GB40764	GB50239	GB50239	GB49942		gene10730	gene8685	gene8685			gene10771			gene11317	gene1609	gene2015	gene5287
		GB40765	GB50282	GB50282	GB49984		gene10731	gene8706	gene8706			gene10774			gene11318	gene1623	gene2023	gene531
		GB40766	GB50415	GB50415	GB50062		gene10740	gene8710	gene8710			gene10775			gene1132	gene1631	gene2052	gene5310
		GB40767	GB50420	GB50420	GB50068		gene10742	gene8711	gene8711			gene10778			gene11330	gene165	gene2069	gene5323
		GB40769	GB50445	GB50445	GB50076		gene10745	gene8751	gene8751			gene10781			gene11333	gene1656	gene2096	gene5343
		GB40770	GB50497	GB50497	GB50091		gene10746	gene8761	gene8761			gene10782			gene11336	gene1663	gene210	gene5345
		GB40771	GB50509	GB50509	GB50106		gene10747	gene8824	gene8824			gene10783			gene11338	gene1669	gene2125	gene5354
		GB40773	GB50515	GB50515	GB50136		gene10748	gene8862	gene8862			gene10785			gene1134	gene1681	gene2129	gene5403
		GB40774	GB50615	GB50615	GB50151		gene1075	gene895	gene895			gene10789			gene11341	gene1712	gene2131	gene5428
		GB40775	GB50627	GB50627	GB50230		gene10762	gene897	gene897			gene10791			gene11344	gene1713	gene2132	gene5439
		GB40778	GB50694	GB50694	GB50236		gene10763	gene8981	gene8981			gene10799			gene11345	gene173	gene2135	gene550
		GB40781	GB50728	GB50728	GB50259		gene10766	gene9027	gene9027			gene1080			gene11350	gene1747	gene2137	gene550
		GB40782	GB50739	GB50739	GB50334		gene10767	gene9104	gene9104			gene10802			gene11352	gene1761	gene2159	gene5521
		GB40783	GB50756	GB50756	GB50338		gene10770	gene9145	gene9145			gene10804			gene11353	gene1769	gene2160	gene5526
		GB40784	GB50777	GB50777	GB50365		gene10771	gene9167	gene9167			gene10805			gene11358	gene1785	gene2163	gene5555
		GB40785	GB50795	GB50795	GB50377		gene10774	gene9210	gene9210			gene10806			gene1136	gene1799	gene2164	gene5560
		GB40794	GB50817	GB50817	GB50514		gene10775	gene9234	gene9234			gene10808			gene11363	gene1800	gene2174	gene5581
		GB40796	GB50824	GB50824	GB50526		gene10777	gene9235	gene9235			gene10809			gene11364	gene1805	gene2175	gene5584
		GB40797	GB50976	GB50976	GB50572		gene10778	gene9239	gene9239			gene1081			gene11367	gene1807	gene2187	gene5589
		GB40799	GB51065	GB51065	GB50598		gene10781	gene9257	gene9257			gene10810			gene11382	gene1836	gene2192	gene5590
		GB40802	GB51072	GB51072	GB50641		gene10782	gene9276	gene9276			gene10812			gene11386	gene1839	gene2193	gene5606
		GB40804	GB51088	GB51088	GB50662		gene10783	gene9317	gene9317			gene10813			gene11389	gene184	gene2194	gene5617
		GB40805	GB51090	GB51090	GB50730		gene10785	gene9403	gene9403			gene10814			gene1140	gene1840	gene2211	gene5621
		GB40806	GB51117	GB51117	GB50741		gene10789	gene9442	gene9442			gene10816			gene11401	gene1858	gene2226	gene5639
		GB40807	GB51188	GB51188	GB50831		gene10791	gene9467	gene9467			gene10817			gene11405	gene1887	gene2247	gene5672
		GB40808	GB51197	GB51197	GB50857		gene10798	gene9469	gene9469			gene10825			gene11418	gene1895	gene225	gene5674
		GB40809	GB51261	GB51261	GB50865		gene10799	gene9470	gene9470			gene10826			gene11420	gene1903	gene2251	gene5709
		GB40816	GB51429	GB51429	GB50871		gene1080	gene954	gene954			gene10828			gene11421	gene1905	gene2258	gene5716
		GB40823	GB51479	GB51479	GB50877		gene10802	gene9561	gene9561			gene10830			gene11457	gene1906	gene2263	gene5806
		GB40824	GB51499	GB51499	GB50909		gene10804	gene9596	gene9596			gene10832			gene11460	gene1914	gene227	gene5813
		GB40830	GB51513	GB51513	GB50965		gene10805	gene9743	gene9743			gene10834			gene11461	gene195	gene2278	gene5823
		GB40831	GB51543	GB51543	GB51011		gene10806	gene9887	gene9887			gene10837			gene11462	gene1989	gene2289	gene5854
		GB40833	GB51550	GB51550	GB51068		gene10808	gene989	gene989			gene10840			gene11465	gene1990	gene2312	gene587
		GB40837	GB51580	GB51580	GB51079		gene10809	gene992	gene992			gene10842			gene11472	gene1995	gene2317	gene5932
		GB40838	GB51607	GB51607	GB51125		gene1081	gene9941	gene9941			gene10844			gene11473	gene2040	gene2318	gene5954
		GB40842	GB51633	GB51633	GB51155		gene10810	gene998	gene998			gene10847			gene11481	gene2055	gene2333	gene6004
		GB40843	GB51651	GB51651	GB51227		gene10812	gene10000				gene10849			gene1149	gene2058	gene2346	gene6012
		GB40845	GB51665	GB51665	GB51303		gene10813	gene1001				gene10851			gene11497	gene2061	gene2348	gene6048
		GB40857	GB51743	GB51743	GB51521		gene10814	gene10014				gene10856			gene11519	gene2086	gene2369	gene6062
		GB40858	GB52023	GB52023	GB51539		gene10816	gene10032				gene10857			gene11529	gene2102	gene2381	gene6087
		GB40859	GB52103	GB52103	GB51541		gene10817	gene10089				gene10858			gene11539	gene2111	gene2384	gene6088
		GB40861	GB52109	GB52109	GB51638		gene10825	gene10105				gene10863			gene11543	gene2144	gene2385	gene6121
		GB40865	GB52152	GB52152	GB51655		gene10826	gene10150				gene10865			gene11555	gene2147	gene2389	gene6140
		GB40866	GB52157	GB52157	GB51671		gene10828	gene10184				gene10867			gene1156	gene2158	gene2411	gene6149
		GB40867	GB52230	GB52230	GB51691		gene10830	gene1019				gene10868			gene11561	gene2162	gene2412	gene615
		GB40868	GB52347	GB52347	GB51705		gene10832	gene1035				gene10872			gene11565	gene2199	gene2414	gene6150
		GB40871	GB52656	GB52656	GB51728		gene10834	gene10352				gene10873			gene11568	gene2208	gene2452	gene618
		GB40874	GB52722	GB52722	GB51775		gene10837	gene10359				gene10879			gene1157	gene2210	gene2466	gene6185
		GB40878	GB52755	GB52755	GB51782		gene10840	gene10366				gene10881			gene11570	gene2215	gene2499	gene6191
		GB40880	GB52792	GB52792	GB51793		gene10842	gene10435				gene10882			gene11574	gene2255	gene2503	gene6217
		GB40881	GB53014	GB53014	GB51849		gene10844	gene10477				gene10884			gene11579	gene2271	gene2512	gene6380
		GB40883	GB53019	GB53019	GB51884		gene10847	gene10511				gene10888			gene1158	gene2274	gene2521	gene6389
		GB40884	GB53046	GB53046	GB51898		gene10849	gene10559				gene10889			gene11583	gene2277	gene2522	gene6398
		GB40885	GB53065	GB53065	GB51909		gene10851	gene10602				gene10896			gene11588	gene2283	gene2533	gene6402
		GB40886	GB53119	GB53119	GB51997		gene10856	gene10605				gene10897			gene1159	gene2293	gene2596	gene6403
		GB40887	GB53219	GB53219	GB52007		gene10857	gene10621				gene10898			gene11604	gene2305	gene2603	gene6515
		GB40888	GB53287	GB53287	GB52039		gene10858	gene10626				gene10899			gene11610	gene2307	gene2604	gene6558
		GB40891	GB53375	GB53375	GB52056		gene10863	gene10633				gene109			gene11613	gene2314	gene2605	gene6559
		GB40893	GB53414	GB53414	GB52098		gene10865	gene10657				gene10900			gene11622	gene2319	gene2611	gene6638
		GB40894	GB53424	GB53424	GB52104		gene10867	gene10698				gene10902			gene11628	gene2322	gene2616	gene6681
		GB40895	GB53456	GB53456	GB52251		gene10868	gene10781				gene10903			gene11629	gene233	gene2622	gene6694
		GB40901	GB53457	GB53457	GB52314		gene10872	gene10810				gene10905			gene11632	gene2340	gene264	gene6698
		GB40903	GB53486	GB53486	GB52322		gene10873	gene10826				gene10906			gene11637	gene2343	gene2677	gene6752
		GB40906	GB53491	GB53491	GB52345		gene10879	gene10827				gene10907			gene11648	gene2352	gene2705	gene6757
		GB40907	GB53567	GB53567	GB52465		gene10881	gene10968				gene1091			gene11649	gene236	gene2710	gene6798
		GB40908	GB53578	GB53578	GB52524		gene10882	gene11001				gene10910			gene11654	gene2360	gene2723	gene6802
		GB40909	GB53579	GB53579	GB52532		gene10884	gene11134				gene10912			gene11657	gene2365	gene2724	gene6842
		GB40911	GB53582	GB53582	GB52559		gene10888	gene11157				gene10916			gene11660	gene2376	gene2734	gene6896
		GB40916	GB53639	GB53639	GB52560		gene10889	gene11183				gene10917			gene11674	gene2377	gene2746	gene6897
		GB40923	GB53655	GB53655	GB52601		gene10896	gene11225				gene10918			gene11676	gene238	gene275	gene6926
		GB40926	GB53669	GB53669	GB52643		gene10897	gene11246				gene1092			gene11682	gene2383	gene2766	gene6930
		GB40928	GB53672	GB53672	GB52660		gene10898	gene11288				gene10922			gene11689	gene2386	gene2774	gene6931
		GB40929	GB53710	GB53710	GB52756		gene10899	gene11290				gene10926			gene11695	gene2387	gene2778	gene6937
		GB40932	GB53719	GB53719	GB52781		gene109	gene11299				gene10927			gene11696	gene2391	gene2780	gene6942
		GB40934	GB53750	GB53750	GB52819		gene10900	gene11307				gene10929			gene1170	gene2392	gene2781	gene6944
		GB40935	GB53777	GB53777	GB52955		gene10902	gene11347				gene10930			gene11702	gene2393	gene2798	gene6996
		GB40941	GB53811	GB53811	GB53012		gene10903	gene11368				gene10931			gene11709	gene2394	gene2804	gene7001
		GB40944	GB53886	GB53886	GB53017		gene10905	gene11443				gene10933			gene11712	gene2395	gene283	gene7014
		GB40945	GB53943	GB53943	GB53068		gene10906	gene11457				gene10934			gene11717	gene2396	gene2845	gene7030
		GB40946	GB54130	GB54130	GB53138		gene10907	gene11478				gene1094			gene11733	gene2402	gene2867	gene7031
		GB40948	GB54181	GB54181	GB53171		gene1091	gene11481				gene10940			gene11743	gene2403	gene2873	gene7050
		GB40949	GB54210	GB54210	GB53173		gene10910	gene11505				gene10941			gene11744	gene2427	gene2874	gene7082
		GB40955	GB54258	GB54258	GB53239		gene10912	gene11537				gene10944			gene11747	gene2428	gene2878	gene7098
		GB40963	GB54267	GB54267	GB53334		gene10916	gene11548				gene10948			gene11755	gene2429	gene2893	gene7098
		GB40966	GB54283	GB54283	GB53433		gene10917	gene11570				gene10950			gene11782	gene243	gene2898	gene710
		GB40967	GB54294	GB54294	GB53619		gene10918	gene11621				gene10954			gene11784	gene2433	gene2932	gene7116
		GB40973	GB54388	GB54388	GB53624		gene1092	gene11735				gene10956			gene11789	gene2435	gene2933	gene7193
		GB40975	GB54452	GB54452	GB53654		gene10922	gene11771				gene10958			gene11793	gene2439	gene2935	gene7199
		GB40976	GB54511	GB54511	GB53685		gene10926	gene11805				gene10959			gene1180	gene2443	gene2960	gene7221
		GB40977	GB54578	GB54578	GB53696		gene10927	gene11841				gene10960			gene11804	gene2448	gene2978	gene7227
		GB40980	GB54798	GB54798	GB53702		gene10929	gene1186				gene10962			gene11817	gene2465	gene2980	gene7241
		GB40983	GB54802	GB54802	GB53747		gene10930	gene11933				gene10967			gene11818	gene249	gene2989	gene7280
		GB40984	GB54806	GB54806	GB53788		gene10931	gene11971				gene10969			gene11820	gene2496	gene3	gene7306
		GB40986	GB54817	GB54817	GB53860		gene10933	gene11987				gene10973			gene11821	gene2507	gene300	gene7308
		GB40993	GB54818	GB54818	GB53865		gene10934	gene12111				gene10975			gene11826	gene2514	gene3027	gene7316
		GB40996	GB54830	GB54830	GB53876		gene1094	gene12184				gene10977			gene11831	gene2516	gene3041	gene733
		GB40997	GB54923	GB54923	GB53932		gene10940	gene12211				gene10980			gene11846	gene2523	gene3094	gene7332
		GB40999	GB54938	GB54938	GB53974		gene10941	gene12264				gene10981			gene11850	gene2524	gene31	gene7368
		GB41003	GB54975	GB54975	GB54093		gene10944	gene12286				gene10984			gene11852	gene2546	gene3104	gene7375
		GB41011	GB54978	GB54978	GB54097		gene10948	gene1229				gene10988			gene11853	gene2552	gene3115	gene7404
		GB41024	GB54999	GB54999	GB54137		gene10950	gene1230				gene10989			gene11854	gene2554	gene3131	gene7421
		GB41025	GB55007	GB55007	GB54170		gene10954	gene1249				gene10991			gene11855	gene2598	gene3135	gene7459
		GB41027	GB55012	GB55012	GB54189		gene10956	gene1253				gene10992			gene11857	gene2602	gene3142	gene7463
		GB41028	GB55162	GB55162	GB54209		gene10958	gene1334				gene10993			gene1186	gene2612	gene3152	gene7474
		GB41029	GB55204	GB55204	GB54219		gene10959	gene1354				gene10995			gene11887	gene2621	gene3168	gene7539
		GB41030	GB55205	GB55205	GB54246		gene10960	gene1377				gene10996			gene11888	gene2644	gene3175	gene7670
		GB41031	GB55206	GB55206	GB54268		gene10961	gene1379				gene10997			gene11892	gene2646	gene3179	gene7701
		GB41032	GB55209	GB55209	GB54311		gene10962	gene1476				gene11			gene11893	gene2676	gene3185	gene7756
		GB41035	GB55212	GB55212	GB54315		gene10967	gene1499				gene11001			gene11897	gene269	gene3193	gene7786
		GB41036	GB55213	GB55213	GB54320		gene10969	gene1562				gene11002			gene11899	gene2693	gene3209	gene7840
		GB41037	GB55220	GB55220	GB54372		gene10973	gene162				gene11003			gene119	gene2700	gene3211	gene7930
		GB41038	GB55317	GB55317	GB54480		gene10975	gene1663				gene11004			gene11910	gene2708	gene3214	gene7956
		GB41039	GB55350	GB55350	GB54524		gene10977	gene1667				gene11005			gene11915	gene2714	gene3218	gene7959
		GB41042	GB55356	GB55356	GB54571		gene10980	gene1669				gene11006			gene1192	gene2720	gene3228	gene7999
		GB41043	GB55403	GB55403	GB54611		gene10981	gene1719				gene11007			gene11926	gene2735	gene3238	gene8010
		GB41045	GB55443	GB55443	GB54660		gene10984	gene1807				gene1101			gene11931	gene2752	gene3240	gene8012
		GB41046	GB55501	GB55501	GB54666		gene10988	gene1809				gene11012			gene11934	gene2757	gene3253	gene8043
		GB41063	GB55564	GB55564	GB54673		gene10989	gene1827				gene11013			gene11936	gene2759	gene3261	gene8095
		GB41065	GB55590	GB55590	GB54676		gene10991	gene1846				gene11014			gene11939	gene2763	gene327	gene8121
		GB41068	GB55593	GB55593	GB54684		gene10992	gene1896				gene11016			gene11942	gene2795	gene328	gene8128
		GB41069	GB55598	GB55598	GB54732		gene10993	gene2084				gene11017			gene11952	gene2800	gene3280	gene8157
		GB41073	GB55619	GB55619	GB54734		gene10995	gene2111				gene11018			gene11954	gene2813	gene3283	gene8159
		GB41075	GB55648	GB55648	GB54809		gene10996	gene2165				gene11019			gene11969	gene2819	gene3289	gene8224
		GB41079	GB55693	GB55693	GB54852		gene10997	gene2168				gene11024			gene11971	gene2822	gene3299	gene8248
		GB41080	GB55757	GB55757	GB54854		gene11	gene2210				gene11025			gene11981	gene2827	gene3305	gene825
		GB41083	GB55946	GB55946	GB54949		gene11001	gene2287				gene11026			gene11982	gene2831	gene3306	gene8259
		GB41094	GB55964	GB55964	GB54970		gene11002	gene2288				gene11028			gene11994	gene2839	gene3328	gene8308
		GB41104	GB55965	GB55965	GB55004		gene11003	gene238				gene11029			gene1200	gene2856	gene3334	gene8328
		GB41115	GB55994	GB55994	GB55006		gene11004	gene2386				gene1103			gene12005	gene2857	gene3345	gene8359
		GB41117	GB56001	GB56001	GB55016		gene11005	gene2387				gene11031			gene1202	gene2875	gene3346	gene8366
		GB41119	GB56032	GB56032	GB55039		gene11006	gene2396				gene11032			gene12022	gene2877	gene3351	gene8413
		GB41122	GB41199	GB41199	GB55201		gene11007	gene2431				gene11034			gene1203	gene2897	gene3429	gene8459
		GB41126	GB42249	GB42249	GB55203		gene1101	gene2440				gene11035			gene1205	gene2900	gene343	gene8511
		GB41127	GB45259	GB45259	GB55207		gene11012	gene2533				gene11036			gene12057	gene2919	gene3438	gene8520
		GB41128	GB47675	GB47675	GB55263		gene11013	gene2548				gene1104			gene12059	gene2920	gene3439	gene8534
		GB41129	GB47845	GB47845	GB55269		gene11014	gene2720				gene11041			gene12062	gene2922	gene3444	gene8551
		GB41134	GB50622	GB50622	GB55301		gene11016	gene276				gene11044			gene12063	gene2924	gene3473	gene8589
		GB41136	GB51359	GB51359	GB55373		gene11017	gene278				gene11045			gene12066	gene2934	gene3485	gene8599
		GB41137	GB51764	GB51764	GB55400		gene11018	gene2822				gene11046			gene1209	gene298	gene3498	gene8678
		GB41138	GB52506	GB52506	GB55440		gene11019	gene2825				gene11049			gene1210	gene3000	gene3508	gene8685
		GB41139	GB52948	GB52948	GB55499		gene11024	gene2856				gene1105			gene1211	gene3004	gene3525	gene8706
		GB41140	GB53970	GB53970	GB55503		gene11025	gene2873				gene11053			gene12126	gene3007	gene3573	gene8710
		GB41141	GB54979	GB54979	GB55515		gene11026	gene2885				gene11054			gene12131	gene3011	gene3575	gene8751
		GB41142	GB43004	GB43004	GB55516		gene11028	gene2895				gene11057			gene12132	gene3014	gene3606	gene8761
		GB41143	GB53043	GB53043	GB55549		gene11029	gene2934				gene11058			gene12135	gene3017	gene3615	gene8824
		GB41146	GB47007	GB47007	GB55569		gene1103	gene3049				gene1106			gene12150	gene3025	gene3631	gene8862
		GB41147	GB52789	GB52789	GB55638		gene11031	gene3060				gene11067			gene12157	gene3032	gene3634	gene8933
		GB41149	GB44032	GB44032	GB55736		gene11032	gene3068				gene11068			gene1216	gene3034	gene3670	gene895
		GB41150	GB54511	GB54511	GB55772		gene11034	gene3150				gene1107			gene12161	gene3036	gene3671	gene897
		GB41151	GB52925	GB52925	GB55789		gene11035	gene3202				gene11078			gene12174	gene304	gene3681	gene9016
		GB41152	GB44917	GB44917	GB55791		gene11036	gene3222				gene1108			gene12177	gene3052	gene3685	gene9027
		GB41153	GB48940	GB48940	GB55825		gene1104	gene3246				gene11080			gene12182	gene3053	gene37	gene9054
		GB41154	GB55601	GB55601	GB55877		gene11041	gene328				gene11083			gene12184	gene3058	gene3702	gene9104
		GB41156	GB41214	GB41214	GB55885		gene11044	gene3304				gene11086			gene1219	gene3066	gene3715	gene9114
		GB41158	GB42260	GB42260	GB55895		gene11045	gene3306				gene11088			gene12193	gene3068	gene373	gene914
		GB41159	GB45328	GB45328	GB55897		gene11046	gene3308				gene1109			gene1220	gene3091	gene3737	gene9145
		GB41160	GB47694	GB47694	GB55922		gene11049	gene3348				gene11091			gene12202	gene311	gene3738	gene9167
		GB41163	GB48021	GB48021	GB55923		gene1105	gene3416				gene11092			gene12205	gene3129	gene3750	gene9195
		GB41164	GB50623	GB50623	GB55948		gene11053	gene3444				gene11094			gene12207	gene3136	gene3769	gene9201
		GB41165	GB51426	GB51426	GB55966		gene11054	gene3481				gene11095			gene12208	gene3147	gene3771	gene9210
		GB41167	GB51787	GB51787	GB55988		gene11057	gene3491				gene11098			gene12209	gene318	gene3797	gene9233
		GB41168	GB52625	GB52625			gene11058	gene3534				gene11099			gene12210	gene3182	gene3798	gene9235
		GB41169	GB53002	GB53002			gene1106	gene3562				gene1110			gene12223	gene3183	gene3799	gene9257
		GB41171	GB53976	GB53976			gene11067	gene363				gene11105			gene12234	gene3192	gene3800	gene9276
		GB41172	GB54996	GB54996			gene11068	gene3678				gene11106			gene1224	gene3196	gene3814	gene9294
		GB41174	GB40453	GB40453			gene1107	gene3681				gene11107			gene12248	gene3197	gene3827	gene9317
		GB41175	GB40580	GB40580			gene11076	gene376				gene11108			gene1225	gene3202	gene3830	gene9395
		GB41176	GB40890	GB40890			gene11078	gene385				gene11115			gene1228	gene3213	gene3841	gene9403
		GB41178	GB40934	GB40934			gene1108	gene389				gene11116			gene12284	gene3229	gene3862	gene9442
		GB41179	GB42871	GB42871			gene11080	gene3951				gene11118			gene12286	gene323	gene3867	gene9456
		GB41180	GB42793	GB42793			gene11083	gene3988				gene11119			gene1229	gene3236	gene389	gene9467
		GB41183	GB42690	GB42690			gene11086	gene4013				gene11123			gene1230	gene324	gene3898	gene9469
		GB41187	GB44654	GB44654			gene11088	gene4017				gene11125			gene12312	gene3250	gene391	gene9470
		GB41188	GB44959	GB44959			gene1109	gene4025				gene11127			gene12313	gene3284	gene3916	gene954
		GB41189	GB44935	GB44935			gene11091	gene4056				gene11128			gene12318	gene3297	gene393	gene9561
		GB41191	GB45418	GB45418			gene11092	gene4068				gene11129			gene1236	gene3302	gene3953	gene9563
		GB41193	GB46027	GB46027			gene11094	gene4131				gene11130			gene1242	gene3335	gene3959	gene9596
		GB41196	GB49264	GB49264			gene11095	gene4180				gene11131			gene1250	gene3338	gene3961	gene9707
		GB41198	GB49539	GB49539			gene11098	gene4189				gene11132			gene1253	gene3343	gene3975	gene9849
		GB41202	GB50101	GB50101			gene11099	gene4203				gene11136			gene1255	gene3348	gene3979	gene9887
		GB41203	GB50553	GB50553			gene1110	gene426				gene11140			gene1258	gene3352	gene3980	gene989
		GB41206	GB48335	GB48335			gene11105	gene4260				gene11143			gene1261	gene3354	gene3994	gene991
		GB41207	GB51693	GB51693			gene11106	gene4296				gene11146			gene1269	gene3358	gene4043	gene992
		GB41208	GB51655	GB51655			gene11107	gene4393				gene11150			gene127	gene3360	gene4054	gene9941
		GB41210	GB54718	GB54718			gene11108	gene4400				gene11151			gene1272	gene3361	gene4056	gene9962
		GB41211	GB55151	GB55151			gene11115	gene4404				gene11152			gene1282	gene3370	gene4067
		GB41212	GB55146	GB55146			gene11116	gene4436				gene11153			gene1283	gene339	gene4068
		GB41213	GB55432	GB55432			gene11118	gene4475				gene11157			gene1294	gene3416	gene4070
		GB41215	GB55211	GB55211			gene11119	gene4497				gene11158			gene1308	gene3442	gene4077
		GB41220	GB40074				gene11121	gene4504				gene11159			gene131	gene3445	gene4079
		GB41222	GB40120				gene11123	gene4515				gene11160			gene1313	gene3460	gene4082
		GB41225	GB40126				gene11125	gene4554				gene11166			gene1317	gene3463	gene4084
		GB41230	GB40134				gene11127	gene4560				gene11168			gene1320	gene347	gene4122
		GB41231	GB40205				gene11128	gene4584				gene1117			gene1321	gene3475	gene4127
		GB41232	GB40251				gene11129	gene4593				gene11170			gene1332	gene3481	gene4144
		GB41233	GB40283				gene11130	gene4634				gene11172			gene1333	gene3482	gene4146
		GB41234	GB40336				gene11131	gene4666				gene11181			gene1352	gene3484	gene4157
		GB41239	GB40426				gene11132	gene4677				gene11183			gene1364	gene3500	gene4165
		GB41240	GB40481				gene11136	gene4782				gene11186			gene1367	gene3518	gene4171
		GB41241	GB40514				gene11140	gene4799				gene11192			gene1379	gene3524	gene4180
		GB41242	GB40713				gene11143	gene4861				gene11196			gene1387	gene3527	gene42
		GB41244	GB40735				gene11146	gene4876				gene11199			gene1391	gene3562	gene4204
		GB41250	GB40746				gene11150	gene4879				gene11200			gene1395	gene3616	gene4206
		GB41252	GB40747				gene11151	gene4963				gene11202			gene1398	gene3622	gene4208
		GB41257	GB40754				gene11152	gene4973				gene11204			gene140	gene363	gene4212
		GB41258	GB40765				gene11153	gene4984				gene11205			gene1406	gene3642	gene4223
		GB41259	GB40830				gene11157	gene505				gene11206			gene1407	gene3669	gene4242
		GB41262	GB40842				gene11158	gene5243				gene1121			gene1408	gene3678	gene4243
		GB41263	GB40863				gene11159	gene5314				gene11210			gene1412	gene3687	gene426
		GB41266	GB40866				gene11160	gene5323				gene11211			gene1416	gene3712	gene4267
		GB41270	GB40883				gene11166	gene5345				gene11213			gene1418	gene3717	gene4296
		GB41280	GB40906				gene11168	gene5354				gene11216			gene1425	gene3718	gene4297
		GB41282	GB40913				gene1117	gene550				gene11218			gene143	gene3720	gene4309
		GB41283	GB40950				gene11170	gene5521				gene11225			gene1437	gene3728	gene4335
		GB41285	GB40976				gene11172	gene5555				gene11227			gene1438	gene3736	gene4336
		GB41287	GB40997				gene11181	gene5560				gene1123			gene1442	gene3742	gene434
		GB41288	GB41212				gene11183	gene5573				gene11230			gene1458	gene3743	gene437
		GB41289	GB41220				gene11186	gene5581				gene11236			gene1464	gene3763	gene4377
		GB41290	GB41283				gene11192	gene5584				gene1124			gene1465	gene3765	gene438
		GB41291	GB41284				gene11196	gene5606				gene11245			gene1470	gene3775	gene4383
		GB41292	GB41332				gene11199	gene5621				gene11246			gene1474	gene3779	gene4396
		GB41293	GB41339				gene11200	gene5716				gene11248			gene1475	gene3803	gene4411
		GB41294	GB41374				gene11202	gene5806				gene1125			gene1476	gene3804	gene4416
		GB41296	GB41376				gene11204	gene5813				gene11255			gene1479	gene3850	gene4417
		GB41297	GB41383				gene11205	gene5853				gene11258			gene1491	gene3852	gene4418
		GB41300	GB41387				gene11206	gene5932				gene1126			gene1492	gene3853	gene4419
		GB41301	GB41388				gene11208	gene6047				gene11263			gene15	gene3854	gene442
		GB41304	GB41638				gene1121	gene6048				gene11265			gene1500	gene3859	gene4425
		GB41305	GB41655				gene11210	gene6062				gene11267			gene1501	gene3861	gene4430
		GB41306	GB41662				gene11211	gene6087				gene1127			gene1502	gene3887	gene4435
		GB41312	GB41671				gene11213	gene6088				gene11270			gene151	gene3897	gene4443
		GB41314	GB41700				gene11216	gene615				gene11272			gene1538	gene3913	gene4444
		GB41332	GB41742				gene11218	gene6185				gene11275			gene1547	gene3930	gene4449
		GB41334	GB41779				gene11225	gene6191				gene11276			gene1550	gene3936	gene4453
		GB41336	GB41803				gene11227	gene6217				gene11277			gene1555	gene3950	gene4458
		GB41338	GB41845				gene1123	gene6441				gene11278			gene1556	gene3954	gene4473
		GB41339	GB41867				gene11230	gene6558				gene11279			gene1560	gene3957	gene4476
		GB41340	GB41889				gene11236	gene6647				gene11284			gene1563	gene396	gene4488
		GB41341	GB41975				gene1124	gene6681				gene11286			gene1567	gene3969	gene4489
		GB41342	GB41983				gene11245	gene6696				gene11287			gene1568	gene3972	gene4511
		GB41343	GB42000				gene11246	gene6698				gene11288			gene1583	gene3982	gene4517
		GB41345	GB42039				gene11248	gene6757				gene1129			gene1585	gene4001	gene4523
		GB41346	GB42079				gene1125	gene6798				gene11293			gene1586	gene4002	gene4584
		GB41347	GB42263				gene11255	gene6802				gene11297			gene1593	gene4003	gene4590
		GB41356	GB42272				gene11258	gene6842				gene11300			gene1594	gene4005	gene4591
		GB41358	GB42296				gene1126	gene6897				gene11301			gene160	gene4010	gene4598
		GB41361	GB42311				gene11263	gene6930				gene11304			gene1609	gene4016	gene4599
		GB41363	GB42365				gene11265	gene6981				gene11306			gene1623	gene4017	gene4615
		GB41364	GB42411				gene11267	gene6996				gene11307			gene1630	gene4023	gene4633
		GB41366	GB42423				gene1127	gene7001				gene11310			gene1631	gene4062	gene464
		GB41368	GB42476				gene11270	gene7014				gene11313			gene1639	gene4074	gene4655
		GB41372	GB42477				gene11272	gene7037				gene11314			gene164	gene4076	gene4663
		GB41373	GB42478				gene11275	gene7050				gene11317			gene165	gene4100	gene4669
		GB41374	GB42501				gene11276	gene7098				gene11318			gene1656	gene4105	gene4675
		GB41376	GB42519				gene11277	gene7193				gene11319			gene1663	gene4131	gene4697
		GB41378	GB42651				gene11278	gene7227				gene1132			gene1669	gene4169	gene4702
		GB41390	GB42744				gene11279	gene7233				gene11324			gene1677	gene4170	gene4721
		GB41391	GB42753				gene11284	gene7280				gene11328			gene1681	gene4177	gene4723
		GB41392	GB42828				gene11286	gene7308				gene11330			gene1683	gene4189	gene4734
		GB41397	GB42838				gene11287	gene733				gene11331			gene1703	gene4203	gene474
		GB41398	GB42849				gene11288	gene7474				gene11333			gene1709	gene4228	gene4743
		GB41401	GB42889				gene1129	gene7566				gene11336			gene171	gene4230	gene4765
		GB41403	GB42925				gene11293	gene7840				gene11338			gene1712	gene4233	gene4783
		GB41406	GB42957				gene11297	gene7959				gene1134			gene1713	gene4235	gene4797
		GB41409	GB43004				gene11300	gene7999				gene11341			gene1719	gene4239	gene4801
		GB41410	GB43054				gene11301	gene8010				gene11342			gene1721	gene4240	gene4829
		GB41412	GB43093				gene11304	gene8043				gene11344			gene1724	gene4244	gene4834
		GB41413	GB43112				gene11306	gene8121				gene11345			gene173	gene4257	gene4857
		GB41414	GB43123				gene11307	gene8128				gene11347			gene1741	gene4260	gene4871
		GB41417	GB43168				gene11310	gene8157				gene11348			gene1747	gene4273	gene4884
		GB41419	GB43247				gene11313	gene8224				gene1135			gene1748	gene4277	gene490
		GB41422	GB43270				gene11314	gene824				gene11350			gene1760	gene4287	gene492
		GB41423	GB43315				gene11317	gene8248				gene11352			gene1761	gene4289	gene4933
		GB41425	GB43463				gene11318	gene825				gene11353			gene1769	gene429	gene4953
		GB41427	GB43554				gene11319	gene8328				gene11358			gene1770	gene4291	gene4959
		GB41428	GB43569				gene1132	gene8359				gene1136			gene1772	gene4304	gene4965
		GB41439	GB43580				gene11324	gene8366				gene11361			gene1784	gene4317	gene4971
		GB41444	GB43581				gene11328	gene8413				gene11362			gene1785	gene4319	gene4989
		GB41445	GB43728				gene11330	gene8448				gene11363			gene1799	gene4339	gene4993
		GB41446	GB43734				gene11331	gene8511				gene11364			gene180	gene4342	gene4996
		GB41448	GB43742				gene11333	gene8520				gene11365			gene1800	gene4354	gene5034
		GB41449	GB43772				gene11335	gene8534				gene11367			gene1803	gene4358	gene507
		GB41450	GB43784				gene11336	gene857				gene11368			gene1805	gene4360	gene5096
		GB41451	GB43823				gene11338	gene8599				gene11369			gene1807	gene4363	gene5107
		GB41454	GB43839				gene1134	gene8657				gene1137			gene1824	gene4373	gene5122
		GB41455	GB43847				gene11341	gene8659				gene11370			gene1827	gene4380	gene5127
		GB41464	GB43848				gene11342	gene8933				gene11371			gene1832	gene4393	gene5142
		GB41467	GB43884				gene11344	gene9016				gene11374			gene1833	gene4400	gene5145
		GB41469	GB43914				gene11345	gene9054				gene11382			gene1836	gene4402	gene5150
		GB41471	GB43953				gene11347	gene9114				gene11385			gene1839	gene4404	gene5166
		GB41484	GB44010				gene11348	gene914				gene11386			gene184	gene4414	gene5172
		GB41485	GB44056				gene1135	gene9195				gene11389			gene1840	gene4422	gene5173
		GB41486	GB44084				gene11350	gene9201				gene11390			gene1846	gene4427	gene5188
		GB41487	GB44158				gene11352	gene9233				gene1140			gene1853	gene4432	gene5201
		GB41488	GB44225				gene11353	gene9294				gene11401			gene1858	gene4442	gene5207
		GB41491	GB44339				gene11358	gene9395				gene11404			gene1859	gene445	gene5227
		GB41492	GB44356				gene1136	gene9456				gene11405			gene1867	gene4463	gene5250
		GB41494	GB44411				gene11361	gene9563				gene1141			gene1887	gene4466	gene5275
		GB41495	GB44414				gene11362	gene9656				gene11413			gene1895	gene4478	gene5287
		GB41499	GB44416				gene11363	gene9707				gene11418			gene1896	gene4485	gene529
		GB41504	GB44452				gene11364	gene9709				gene11420			gene1898	gene4496	gene531
		GB41507	GB44455				gene11365	gene9849				gene11421			gene1903	gene4497	gene5310
		GB41510	GB44469				gene11367	gene991				gene11422			gene1905	gene4504	gene5319
		GB41516	GB44503				gene11368	gene9951				gene11426			gene1906	gene4520	gene5325
		GB41517	GB44508				gene11369	gene9962				gene11427			gene1914	gene4535	gene5341
		GB41519	GB44514				gene1137					gene11457			gene195	gene4536	gene5343
		GB41520	GB44557				gene11370					gene1146			gene196	gene4537	gene5361
		GB41521	GB44580				gene11371					gene11460			gene1989	gene4556	gene5382
		GB41522	GB44585				gene11374					gene11461			gene1990	gene456	gene539
		GB41523	GB44608				gene11382					gene11462			gene1995	gene4560	gene5391
		GB41525	GB44634				gene11385					gene11465			gene2	gene4564	gene5393
		GB41540	GB44640				gene11386					gene11466			gene2007	gene4566	gene5401
		GB41543	GB44659				gene11389					gene11468			gene2015	gene4602	gene542
		GB41544	GB44660				gene11390					gene11469			gene2023	gene461	gene5422
		GB41547	GB44683				gene11394					gene1147			gene2040	gene463	gene5433
		GB41553	GB44765				gene1140					gene11470			gene2052	gene4641	gene5451
		GB41569	GB44774				gene11401					gene11472			gene2055	gene465	gene5454
		GB41588	GB44841				gene11404					gene11473			gene2058	gene4665	gene5465
		GB41590	GB44925				gene11405					gene11478			gene2061	gene4667	gene5466
		GB41591	GB44944				gene11406					gene11481			gene2069	gene4677	gene5473
		GB41592	GB44967				gene1141					gene11485			gene2086	gene4678	gene5482
		GB41598	GB44970				gene11413					gene1149			gene2096	gene4686	gene5483
		GB41600	GB44988				gene11418					gene11490			gene210	gene4688	gene5511
		GB41601	GB45040				gene11420					gene11492			gene2102	gene4696	gene5515
		GB41602	GB45070				gene11421					gene11495			gene2111	gene4701	gene5517
		GB41603	GB45159				gene11422					gene11497			gene2125	gene4706	gene5534
		GB41604	GB45248				gene11426					gene11499			gene2129	gene4717	gene5567
		GB41606	GB45365				gene11427					gene1150			gene2131	gene4761	gene5570
		GB41607	GB45377				gene11457					gene1151			gene2132	gene4773	gene5572
		GB41609	GB45400				gene1146					gene11519			gene2135	gene4777	gene5589
		GB41610	GB45421				gene11460					gene11522			gene2137	gene4788	gene561
		GB41616	GB45427				gene11461					gene11529			gene2144	gene4798	gene5611
		GB41617	GB45435				gene11462					gene11537			gene2147	gene4802	gene5614
		GB41622	GB45437				gene11465					gene11539			gene2158	gene4803	gene5616
		GB41625	GB45454				gene11466					gene11541			gene2159	gene4817	gene565
		GB41627	GB45456				gene11468					gene11543			gene2160	gene4830	gene5660
		GB41629	GB45495				gene11469					gene11544			gene2162	gene4832	gene5674
		GB41631	GB45565				gene1147					gene11545			gene2163	gene4859	gene5684
		GB41633	GB45568				gene11470					gene11546			gene2164	gene487	gene5687
		GB41634	GB45675				gene11472					gene11547			gene2174	gene4879	gene5693
		GB41638	GB45682				gene11473					gene11548			gene2175	gene4892	gene5702
		GB41639	GB45696				gene11478					gene11551			gene2187	gene4896	gene5720
		GB41642	GB45701				gene11481					gene11552			gene2192	gene4902	gene5726
		GB41643	GB45717				gene11485					gene11555			gene2193	gene4927	gene5728
		GB41645	GB45758				gene1149					gene11558			gene2194	gene496	gene574
		GB41646	GB45777				gene11490					gene1156			gene2199	gene4966	gene5743
		GB41651	GB45851				gene11492					gene11561			gene2208	gene4973	gene5748
		GB41653	GB45853				gene11495					gene11565			gene2210	gene4994	gene5751
		GB41654	GB45876				gene11497					gene11566			gene2211	gene5019	gene5766
		GB41658	GB45906				gene11499					gene11567			gene2215	gene5020	gene578
		GB41659	GB45909				gene1150					gene11568			gene2226	gene5044	gene5798
		GB41661	GB45913				gene1151					gene1157			gene2247	gene5048	gene5813
		GB41662	GB45945				gene11514					gene11570			gene225	gene5079	gene5814
		GB41667	GB45950				gene11519					gene11573			gene2251	gene5080	gene5817
		GB41668	GB45973				gene11522					gene11574			gene2255	gene5081	gene582
		GB41669	GB46008				gene11529					gene11579			gene2258	gene5086	gene5829
		GB41670	GB46013				gene11537					gene1158			gene2263	gene5089	gene5838
		GB41671	GB46022				gene11539					gene11583			gene227	gene5102	gene5855
		GB41672	GB46045				gene11541					gene11587			gene2271	gene5103	gene5863
		GB41674	GB46057				gene11543					gene11588			gene2274	gene5106	gene5868
		GB41677	GB46076				gene11544					gene1159			gene2277	gene5108	gene587
		GB41680	GB46146				gene11545					gene11592			gene2278	gene5111	gene5885
		GB41681	GB46169				gene11546					gene11594			gene2283	gene5112	gene5887
		GB41684	GB46178				gene11547					gene1160			gene2289	gene5121	gene5891
		GB41688	GB46276				gene11548					gene11602			gene2293	gene5123	gene5894
		GB41689	GB46277				gene11551					gene11604			gene2305	gene5129	gene5895
		GB41690	GB46300				gene11552					gene11610			gene2307	gene5156	gene5897
		GB41691	GB46302				gene11555					gene11611			gene2312	gene5198	gene5899
		GB41692	GB46306				gene11558					gene11613			gene2314	gene5203	gene594
		GB41693	GB46318				gene1156					gene11616			gene2317	gene5206	gene5956
		GB41694	GB46347				gene11561					gene1162			gene2318	gene5219	gene5957
		GB41695	GB46408				gene11565					gene11620			gene2319	gene5220	gene5968
		GB41697	GB46422				gene11566					gene11622			gene2322	gene5244	gene5990
		GB41698	GB46503				gene11567					gene11628			gene233	gene5246	gene5999
		GB41700	GB46569				gene11568					gene11629			gene2333	gene5262	gene6
		GB41701	GB46635				gene1157					gene11632			gene2340	gene5278	gene6004
		GB41703	GB46642				gene11570					gene11637			gene2343	gene5286	gene6012
		GB41704	GB46697				gene11573					gene11639			gene2346	gene5300	gene6014
		GB41710	GB46763				gene11574					gene11641			gene2348	gene5301	gene6022
		GB41711	GB46774				gene11579					gene11644			gene2352	gene5303	gene6048
		GB41713	GB46902				gene1158					gene11648			gene236	gene5304	gene6063
		GB41714	GB47026				gene11580					gene11649			gene2360	gene5323	gene6073
		GB41715	GB47029				gene11583					gene11650			gene2365	gene5331	gene6075
		GB41716	GB47049				gene11587					gene11651			gene2369	gene5337	gene6086
		GB41719	GB47069				gene11588					gene11654			gene2376	gene5342	gene6087
		GB41720	GB47079				gene1159					gene11657			gene2377	gene5354	gene6097
		GB41724	GB47105				gene11592					gene11659			gene238	gene5384	gene6105
		GB41727	GB47136				gene11594					gene11660			gene2381	gene5405	gene6114
		GB41731	GB47141				gene1160					gene11661			gene2383	gene5431	gene6115
		GB41732	GB47142				gene11602					gene11666			gene2384	gene5436	gene6117
		GB41734	GB47180				gene11604					gene11667			gene2385	gene5438	gene6149
		GB41736	GB47224				gene11610					gene11668			gene2386	gene5450	gene615
		GB41737	GB47278				gene11611					gene11669			gene2387	gene5456	gene616
		GB41738	GB47318				gene11613					gene11674			gene2389	gene5458	gene6161
		GB41740	GB47380				gene11616					gene11676			gene2391	gene5459	gene6170
		GB41742	GB47382				gene1162					gene11682			gene2392	gene5461	gene6205
		GB41744	GB47407				gene11620					gene11689			gene2393	gene5496	gene6208
		GB41745	GB47414				gene11622					gene11693			gene2394	gene550	gene6211
		GB41746	GB47475				gene11628					gene11695			gene2395	gene5514	gene6223
		GB41751	GB47486				gene11629					gene11696			gene2396	gene5520	gene6225
		GB41753	GB47495				gene11632					gene11697			gene2402	gene5530	gene6229
		GB41754	GB47503				gene11637					gene1170			gene2403	gene5541	gene6248
		GB41755	GB47504				gene11639					gene11702			gene2411	gene5555	gene6258
		GB41756	GB47528				gene11641					gene11709			gene2412	gene5559	gene6260
		GB41758	GB47545				gene11644					gene11712			gene2414	gene5565	gene6271
		GB41759	GB47546				gene11648					gene11717			gene2427	gene5571	gene6295
		GB41761	GB47563				gene11649					gene1172			gene2428	gene5581	gene6313
		GB41768	GB47588				gene11650					gene1173			gene2429	gene559	gene6319
		GB41769	GB47601				gene11651					gene11731			gene243	gene5591	gene6320
		GB41770	GB47737				gene11654					gene11732			gene2433	gene5594	gene6323
		GB41771	GB47781				gene11657					gene11733			gene2435	gene5599	gene6326
		GB41773	GB47805				gene11659					gene11737			gene2439	gene5600	gene6347
		GB41775	GB47847				gene11660					gene1174			gene2443	gene5606	gene6365
		GB41778	GB47934				gene11661					gene11740			gene2448	gene5613	gene6367
		GB41779	GB47943				gene11666					gene11743			gene2452	gene5621	gene6378
		GB41781	GB47975				gene11667					gene11744			gene2465	gene569	gene6389
		GB41782	GB48041				gene11668					gene11746			gene2466	gene5694	gene6392
		GB41792	GB48062				gene11669					gene11747			gene249	gene5699	gene6398
		GB41793	GB48101				gene11674					gene1175			gene2496	gene570	gene6402
		GB41794	GB48105				gene11676					gene11752			gene2499	gene5704	gene6411
		GB41795	GB48122				gene11682					gene11753			gene2503	gene571	gene6433
		GB41796	GB48189				gene11689					gene11755			gene2507	gene5715	gene644
		GB41797	GB48201				gene11693					gene11756			gene2512	gene5716	gene6478
		GB41798	GB48215				gene11695					gene11757			gene2514	gene5721	gene6500
		GB41800	GB48275				gene11696					gene1176			gene2516	gene5740	gene6506
		GB41801	GB48311				gene11697					gene11764			gene2521	gene5741	gene6509
		GB41802	GB48344				gene1170					gene11765			gene2522	gene5742	gene6518
		GB41803	GB48419				gene11702					gene11779			gene2523	gene5744	gene656
		GB41804	GB48444				gene11707					gene1178			gene2524	gene575	gene6564
		GB41806	GB48462				gene11709					gene11780			gene2533	gene5756	gene6580
		GB41807	GB48577				gene11712					gene11782			gene2546	gene5758	gene6585
		GB41808	GB48653				gene11717					gene11784			gene2552	gene579	gene6594
		GB41810	GB48721				gene1172					gene11786			gene2554	gene5792	gene6599
		GB41811	GB48794				gene1173					gene11789			gene2596	gene5793	gene660
		GB41815	GB48833				gene11731					gene11790			gene2598	gene5806	gene6601
		GB41821	GB48905				gene11732					gene11792			gene2602	gene5821	gene6604
		GB41822	GB48923				gene11733					gene11793			gene2603	gene5823	gene6607
		GB41823	GB48938				gene11737					gene1180			gene2604	gene5824	gene6608
		GB41824	GB48955				gene1174					gene11801			gene2605	gene583	gene6638
		GB41825	GB48981				gene11740					gene11804			gene2611	gene5857	gene666
		GB41829	GB49040				gene11743					gene11805			gene2612	gene5879	gene6667
		GB41831	GB49085				gene11744					gene11812			gene2616	gene588	gene6673
		GB41834	GB49180				gene11746					gene11813			gene2621	gene5907	gene6681
		GB41835	GB49192				gene11747					gene11817			gene2622	gene591	gene671
		GB41836	GB49240				gene1175					gene11818			gene264	gene5940	gene6712
		GB41839	GB49284				gene11752					gene11819			gene2644	gene5942	gene6720
		GB41840	GB49321				gene11753					gene11820			gene2646	gene5943	gene6721
		GB41841	GB49339				gene11755					gene11821			gene2676	gene5959	gene6723
		GB41842	GB49368				gene11756					gene11822			gene2677	gene5963	gene6791
		GB41843	GB49475				gene11757					gene11823			gene269	gene5971	gene6802
		GB41845	GB49488				gene1176					gene11825			gene2693	gene5984	gene6810
		GB41846	GB49514				gene11764					gene11826			gene2700	gene5987	gene6818
		GB41847	GB49518				gene11765					gene11829			gene2705	gene5989	gene6819
		GB41850	GB49538				gene11779					gene11831			gene2708	gene6010	gene6829
		GB41851	GB49551				gene1178					gene11833			gene2710	gene6037	gene6830
		GB41852	GB49552				gene11780					gene11835			gene2714	gene605	gene6857
		GB41855	GB49564				gene11782					gene11838			gene2720	gene6054	gene6868
		GB41856	GB49571				gene11784					gene1184			gene2723	gene6067	gene689
		GB41857	GB49650				gene11786					gene11840			gene2724	gene607	gene6896
		GB41858	GB49651				gene11789					gene11844			gene2734	gene6077	gene6905
		GB41859	GB49688				gene11790					gene11846			gene2735	gene6079	gene6929
		GB41862	GB49714				gene11792					gene11847			gene2746	gene610	gene6935
		GB41863	GB49784				gene11793					gene11850			gene275	gene6101	gene694
		GB41865	GB49785				gene1180					gene11852			gene2752	gene6112	gene6940
		GB41866	GB49801				gene11801					gene11853			gene2757	gene6128	gene6953
		GB41867	GB49870				gene11804					gene11854			gene2759	gene6129	gene697
		GB41869	GB49888				gene11805					gene11855			gene2763	gene6137	gene6977
		GB41871	GB49942				gene11812					gene11857			gene2766	gene6138	gene6992
		GB41872	GB49984				gene11813					gene1186			gene2774	gene6159	gene6998
		GB41873	GB50062				gene11817					gene11882			gene2778	gene6162	gene7004
		GB41874	GB50068				gene11818					gene11887			gene2780	gene6173	gene7008
		GB41875	GB50076				gene11819					gene11888			gene2781	gene6176	gene7009
		GB41876	GB50091				gene11820					gene11889			gene2795	gene6189	gene7016
		GB41877	GB50106				gene11821					gene11892			gene2798	gene6199	gene7029
		GB41881	GB50136				gene11822					gene11893			gene2800	gene6201	gene7030
		GB41882	GB50151				gene11823					gene11894			gene2804	gene6216	gene7042
		GB41883	GB50230				gene11825					gene11895			gene2813	gene6219	gene7046
		GB41884	GB50236				gene11826					gene11896			gene2819	gene6227	gene7058
		GB41886	GB50259				gene11829					gene11897			gene2822	gene6228	gene7066
		GB41888	GB50334				gene11831					gene11899			gene2827	gene6230	gene7083
		GB41889	GB50338				gene11833					gene119			gene283	gene6234	gene7086
		GB41891	GB50365				gene11835					gene11900			gene2831	gene6237	gene7093
		GB41895	GB50377				gene11838					gene11902			gene2839	gene624	gene710
		GB41896	GB50514				gene1184					gene1191			gene2845	gene6261	gene7115
		GB41898	GB50526				gene11840					gene11910			gene2856	gene6265	gene7116
		GB41901	GB50572				gene11844					gene11912			gene2857	gene6281	gene7162
		GB41902	GB50598				gene11846					gene11915			gene2867	gene6294	gene7174
		GB41907	GB50641				gene11847					gene11917			gene2873	gene6337	gene7199
		GB41908	GB50662				gene11850					gene11918			gene2874	gene6349	gene7218
		GB41909	GB50730				gene11852					gene1192			gene2875	gene6359	gene7235
		GB41912	GB50741				gene11853					gene11920			gene2877	gene636	gene7241
		GB41916	GB50831				gene11854					gene11924			gene2878	gene6364	gene7247
		GB41921	GB50857				gene11855					gene11926			gene2893	gene6366	gene7253
		GB41922	GB50865				gene11857					gene11931			gene2897	gene6369	gene7262
		GB41942	GB50871				gene1186					gene11933			gene2898	gene6370	gene7263
		GB41946	GB50877				gene11882					gene11934			gene2900	gene6379	gene7264
		GB41967	GB50909				gene11887					gene11936			gene2919	gene6385	gene7272
		GB41969	GB50965				gene11888					gene11937			gene2920	gene6395	gene729
		GB41970	GB51011				gene11889					gene11939			gene2922	gene6406	gene7290
		GB41972	GB51068				gene11892					gene1194			gene2924	gene6410	gene730
		GB41974	GB51079				gene11893					gene11941			gene2932	gene6417	gene7342
		GB41975	GB51125				gene11894					gene11942			gene2933	gene642	gene735
		GB41976	GB51155				gene11895					gene11946			gene2934	gene6437	gene7362
		GB41977	GB51227				gene11896					gene1195			gene2935	gene6440	gene7377
		GB41979	GB51303				gene11897					gene11952			gene2960	gene6447	gene7381
		GB41980	GB51521				gene11899					gene11954			gene2978	gene6459	gene7386
		GB41981	GB51539				gene119					gene11956			gene298	gene6460	gene739
		GB41982	GB51541				gene11900					gene11957			gene2980	gene6462	gene740
		GB41983	GB51638				gene11902					gene11958			gene2989	gene6475	gene7402
		GB41985	GB51655				gene1191					gene11961			gene3	gene6489	gene7404
		GB41990	GB51671				gene11910					gene11965			gene300	gene6510	gene741
		GB42014	GB51691				gene11912					gene11969			gene3000	gene6513	gene7415
		GB42015	GB51705				gene11915					gene1197			gene3004	gene6519	gene7444
		GB42016	GB51728				gene11917					gene11970			gene3007	gene6533	gene7447
		GB42020	GB51775				gene11918					gene11971			gene3011	gene6545	gene7455
		GB42021	GB51782				gene1192					gene11977			gene3014	gene6550	gene7463
		GB42023	GB51793				gene11920					gene11981			gene3017	gene6558	gene7470
		GB42024	GB51849				gene11924					gene11982			gene3025	gene6561	gene7478
		GB42027	GB51884				gene11926					gene11985			gene3027	gene6571	gene7487
		GB42031	GB51898				gene11931					gene11987			gene3032	gene6577	gene7500
		GB42032	GB51909				gene11933					gene11994			gene3034	gene658	gene753
		GB42035	GB51997				gene11934					gene11995			gene3036	gene6588	gene7554
		GB42036	GB52007				gene11936					gene11997			gene304	gene6590	gene757
		GB42037	GB52039				gene11937					gene11998			gene3041	gene6592	gene7640
		GB42038	GB52056				gene11939					gene1200			gene3052	gene6595	gene7645
		GB42039	GB52098				gene1194					gene12003			gene3053	gene6609	gene7647
		GB42043	GB52104				gene11941					gene12005			gene3058	gene662	gene7651
		GB42052	GB52251				gene11942					gene12008			gene3066	gene663	gene7657
		GB42054	GB52314				gene11946					gene1201			gene3068	gene6636	gene7661
		GB42057	GB52322				gene1195					gene12010			gene3091	gene6639	gene7665
		GB42058	GB52345				gene11952					gene12012			gene3094	gene6643	gene7666
		GB42062	GB52465				gene11954					gene1202			gene31	gene6648	gene7670
		GB42064	GB52524				gene11956					gene12022			gene3104	gene665	gene7681
		GB42066	GB52532				gene11957					gene12027			gene311	gene6650	gene7682
		GB42071	GB52559				gene11958					gene12028			gene3115	gene6657	gene769
		GB42072	GB52560				gene11961					gene1203			gene3129	gene6658	gene7696
		GB42075	GB52601				gene11965					gene12030			gene3131	gene6671	gene7698
		GB42077	GB52643				gene11969					gene12040			gene3135	gene668	gene7701
		GB42079	GB52660				gene1197					gene12041			gene3136	gene6693	gene7705
		GB42081	GB52756				gene11970					gene12047			gene3142	gene6697	gene7709
		GB42082	GB52781				gene11971					gene1205			gene3147	gene6698	gene7723
		GB42083	GB52819				gene11975					gene12057			gene3152	gene6717	gene7732
		GB42084	GB52955				gene11977					gene12059			gene3168	gene6747	gene7736
		GB42085	GB53012				gene11981					gene12062			gene3175	gene6754	gene7739
		GB42093	GB53017				gene11982					gene12063			gene3179	gene6757	gene7756
		GB42096	GB53068				gene11985					gene12066			gene318	gene6758	gene7757
		GB42106	GB53138				gene11987					gene1209			gene3182	gene6760	gene7761
		GB42112	GB53171				gene11994					gene12093			gene3183	gene6763	gene7767
		GB42138	GB53173				gene11995					gene1210			gene3185	gene6766	gene777
		GB42139	GB53239				gene11997					gene12104			gene3192	gene6769	gene7786
		GB42140	GB53334				gene11998					gene1211			gene3193	gene677	gene7804
		GB42141	GB53433				gene1200					gene12111			gene3196	gene6771	gene7806
		GB42142	GB53619				gene12003					gene1212			gene3197	gene6781	gene7818
		GB42143	GB53624				gene12005					gene12120			gene3202	gene6788	gene784
		GB42147	GB53654				gene12008					gene12126			gene3209	gene6792	gene7840
		GB42150	GB53685				gene1201					gene1213			gene3211	gene6800	gene786
		GB42152	GB53696				gene12010					gene12131			gene3213	gene6807	gene7865
		GB42155	GB53702				gene12012					gene12132			gene3214	gene6816	gene7869
		GB42156	GB53747				gene1202					gene12134			gene3218	gene684	gene7873
		GB42159	GB53788				gene12022					gene12135			gene3228	gene6842	gene7876
		GB42161	GB53860				gene12027					gene12136			gene3229	gene686	gene7893
		GB42164	GB53865				gene12028					gene12150			gene323	gene6866	gene7899
		GB42167	GB53876				gene1203					gene12152			gene3236	gene6869	gene7910
		GB42172	GB53932				gene12030					gene12155			gene3238	gene6897	gene7925
		GB42173	GB53974				gene12040					gene12156			gene324	gene6907	gene7934
		GB42175	GB54093				gene12041					gene12157			gene3240	gene6915	gene7941
		GB42178	GB54097				gene12047					gene12158			gene3250	gene6926	gene7947
		GB42180	GB54137				gene1205					gene1216			gene3253	gene695	gene7949
		GB42182	GB54170				gene12057					gene12160			gene3261	gene6959	gene7963
		GB42183	GB54189				gene12059					gene12161			gene327	gene6965	gene7984
		GB42184	GB54209				gene12062					gene12162			gene328	gene698	gene7986
		GB42186	GB54219				gene12063					gene12163			gene3280	gene699	gene7989
		GB42188	GB54246				gene12066					gene12165			gene3283	gene6995	gene7992
		GB42189	GB54268				gene12074					gene12167			gene3284	gene7011	gene7999
		GB42190	GB54311				gene1209					gene12169			gene3289	gene7014	gene800
		GB42192	GB54315				gene12091					gene12170			gene3297	gene7019	gene8021
		GB42193	GB54320				gene12093					gene12172			gene3299	gene7033	gene8037
		GB42194	GB54372				gene1210					gene12174			gene3302	gene7034	gene8041
		GB42195	GB54480				gene12104					gene12177			gene3305	gene7050	gene8043
		GB42196	GB54524				gene1211					gene1218			gene3306	gene7051	gene8044
		GB42200	GB54571				gene12111					gene12182			gene3328	gene7057	gene807
		GB42201	GB54611				gene1212					gene12184			gene3334	gene7082	gene8070
		GB42202	GB54660				gene12120					gene1219			gene3335	gene7085	gene8071
		GB42203	GB54666				gene12126					gene12193			gene3338	gene7087	gene8080
		GB42204	GB54673				gene1213					gene12198			gene3343	gene7089	gene8092
		GB42205	GB54676				gene12131					gene1220			gene3345	gene709	gene8095
		GB42206	GB54684				gene12132					gene12200			gene3346	gene7102	gene81
		GB42207	GB54732				gene12134					gene12202			gene3348	gene7114	gene810
		GB42211	GB54734				gene12135					gene12205			gene3351	gene7126	gene811
		GB42213	GB54809				gene12136					gene12207			gene3352	gene7161	gene8116
		GB42215	GB54852				gene12150					gene12208			gene3354	gene7163	gene8131
		GB42216	GB54854				gene12152					gene12209			gene3358	gene7165	gene8132
		GB42220	GB54949				gene12155					gene1221			gene3360	gene7167	gene8134
		GB42222	GB54970				gene12156					gene12210			gene3361	gene7175	gene814
		GB42223	GB55004				gene12157					gene1222			gene3370	gene7180	gene8162
		GB42224	GB55006				gene12158					gene12221			gene339	gene7181	gene8166
		GB42227	GB55016				gene1216					gene12223			gene3416	gene7198	gene8171
		GB42230	GB55039				gene12160					gene12234			gene3429	gene7205	gene8174
		GB42231	GB55201				gene12161					gene12235			gene343	gene7215	gene8184
		GB42233	GB55203				gene12162					gene1224			gene3438	gene7277	gene8195
		GB42234	GB55207				gene12163					gene12248			gene3439	gene728	gene8197
		GB42236	GB55263				gene12165					gene1225			gene3442	gene7280	gene8202
		GB42237	GB55269				gene12167					gene12251			gene3444	gene7291	gene8207
		GB42239	GB55301				gene12169					gene12264			gene3445	gene7308	gene8209
		GB42241	GB55373				gene12170					gene12271			gene3460	gene731	gene8210
		GB42244	GB55400				gene12172					gene12275			gene3463	gene7312	gene8211
		GB42249	GB55440				gene12174					gene1228			gene347	gene7316	gene822
		GB42252	GB55499				gene12177					gene12284			gene3473	gene7318	gene8223
		GB42260	GB55503				gene1218					gene12286			gene3475	gene7319	gene823
		GB42261	GB55515				gene12182					gene1229			gene3481	gene7330	gene8248
		GB42262	GB55516				gene12184					gene1230			gene3482	gene7347	gene8253
		GB42263	GB55549				gene12186					gene12301			gene3484	gene7351	gene8258
		GB42264	GB55569				gene1219					gene12310			gene3485	gene7353	gene8259
		GB42266	GB55638				gene12193					gene12312			gene3498	gene7369	gene8302
		GB42272	GB55736				gene12198					gene12313			gene3500	gene7395	gene8321
		GB42274	GB55772				gene1220					gene12314			gene3508	gene7405	gene8325
		GB42275	GB55789				gene12200					gene12315			gene3518	gene7409	gene8328
		GB42276	GB55791				gene12202					gene12318			gene3524	gene7421	gene8338
		GB42280	GB55825				gene12205					gene1236			gene3525	gene7423	gene8426
		GB42281	GB55877				gene12207					gene1238			gene3527	gene7426	gene8428
		GB42292	GB55885				gene12208					gene124			gene3562	gene7430	gene8436
		GB42295	GB55895				gene12209					gene1240			gene3573	gene744	gene8439
		GB42296	GB55897				gene1221					gene1242			gene3575	gene7443	gene8458
		GB42297	GB55922				gene12210					gene1246			gene3606	gene7454	gene8498
		GB42298	GB55923				gene1222					gene1250			gene3615	gene7465	gene8503
		GB42300	GB55948				gene12221					gene1252			gene3616	gene7473	gene8511
		GB42304	GB55966				gene12223					gene1253			gene3622	gene7474	gene8514
		GB42306	GB55988				gene12234					gene1255			gene363	gene7475	gene8515
		GB42311					gene12235					gene1257			gene3631	gene7488	gene8528
		GB42312					gene1224					gene1258			gene3634	gene750	gene8539
		GB42316					gene12248					gene1261			gene3642	gene7504	gene8541
		GB42317					gene1225					gene1266			gene3669	gene7542	gene8555
		GB42318					gene12251					gene1269			gene3670	gene7555	gene8567
		GB42319					gene12264					gene127			gene3671	gene7558	gene8569
		GB42321					gene12271					gene1272			gene3678	gene756	gene8570
		GB42323					gene12275					gene1274			gene3681	gene7560	gene8571
		GB42324					gene1228					gene1275			gene3685	gene7585	gene8577
		GB42326					gene12284					gene1277			gene3687	gene7596	gene8584
		GB42327					gene12286					gene128			gene37	gene7609	gene8597
		GB42330					gene1229					gene1282			gene3702	gene765	gene8602
		GB42334					gene1230					gene1283			gene3712	gene7656	gene861
		GB42350					gene12301					gene1285			gene3715	gene766	gene8617
		GB42352					gene12308					gene1291			gene3717	gene7694	gene8618
		GB42354					gene12310					gene1294			gene3718	gene7695	gene8639
		GB42355					gene12312					gene1298			gene3720	gene7725	gene8675
		GB42356					gene12313					gene130			gene3728	gene7737	gene8678
		GB42358					gene12314					gene1301			gene373	gene7752	gene8684
		GB42360					gene12315					gene1305			gene3736	gene7754	gene8685
		GB42365					gene12318					gene1308			gene3737	gene7759	gene8692
		GB42367					gene1236					gene131			gene3738	gene778	gene8698
		GB42369					gene1238					gene1312			gene3742	gene7780	gene870
		GB42372					gene124					gene1313			gene3743	gene7796	gene8706
		GB42374					gene1240					gene1314			gene3750	gene7798	gene8731
		GB42375					gene1242					gene1315			gene3763	gene7801	gene8746
		GB42376					gene1246					gene1316			gene3765	gene7807	gene8748
		GB42377					gene1250					gene1317			gene3769	gene7816	gene8758
		GB42378					gene1252					gene1318			gene3771	gene7823	gene8761
		GB42379					gene1253					gene1320			gene3775	gene7846	gene8771
		GB42381					gene1255					gene1321			gene3779	gene7851	gene8775
		GB42383					gene1257					gene1327			gene3797	gene7868	gene8782
		GB42384					gene1258					gene1332			gene3798	gene7883	gene8790
		GB42385					gene1261					gene1333			gene3799	gene7901	gene8795
		GB42400					gene1266					gene1334			gene3800	gene7926	gene8803
		GB42401					gene1269					gene1343			gene3803	gene7930	gene8814
		GB42408					gene127					gene135			gene3804	gene7935	gene8816
		GB42409					gene1272					gene1352			gene3814	gene7937	gene8827
		GB42411					gene1274					gene1354			gene3827	gene7942	gene8848
		GB42412					gene1275					gene1356			gene3830	gene7954	gene8852
		GB42414					gene1277					gene1358			gene3841	gene7956	gene8853
		GB42416					gene128					gene1360			gene3850	gene7959	gene8858
		GB42418					gene1282					gene1363			gene3852	gene7978	gene8862
		GB42419					gene1283					gene1364			gene3853	gene7981	gene8864
		GB42420					gene1285					gene1367			gene3854	gene7983	gene887
		GB42422					gene1291					gene1369			gene3859	gene7988	gene8873
		GB42423					gene1294					gene137			gene3861	gene7991	gene8884
		GB42424					gene1298					gene1370			gene3862	gene801	gene8897
		GB42425					gene130					gene1375			gene3867	gene8010	gene8900
		GB42426					gene1301					gene1377			gene3887	gene8015	gene8920
		GB42427					gene1305					gene1379			gene389	gene8019	gene8922
		GB42428					gene1308					gene138			gene3897	gene8025	gene8926
		GB42429					gene131					gene1383			gene3898	gene8052	gene895
		GB42431					gene1312					gene1384			gene391	gene8054	gene8951
		GB42436					gene1313					gene1386			gene3913	gene8062	gene8954
		GB42447					gene1314					gene1387			gene3916	gene8069	gene8968
		GB42448					gene1315					gene1388			gene393	gene8084	gene897
		GB42450					gene1316					gene1390			gene3930	gene8088	gene8991
		GB42451					gene1317					gene1391			gene3936	gene8090	gene9005
		GB42454					gene1318					gene1392			gene3950	gene8096	gene9015
		GB42455					gene1320					gene1395			gene3953	gene8098	gene9027
		GB42457					gene1321					gene1398			gene3954	gene8109	gene9031
		GB42466					gene1327					gene14			gene3957	gene8124	gene9049
		GB42468					gene1332					gene140			gene3959	gene8126	gene9062
		GB42478					gene1333					gene1400			gene396	gene8140	gene9064
		GB42479					gene1334					gene1402			gene3961	gene8152	gene9067
		GB42482					gene1343					gene1406			gene3969	gene8153	gene9069
		GB42484					gene135					gene1407			gene3972	gene8154	gene9070
		GB42487					gene1352					gene1408			gene3975	gene8181	gene9076
		GB42489					gene1354					gene1409			gene3979	gene8182	gene9078
		GB42492					gene1356					gene141			gene3980	gene8190	gene9089
		GB42493					gene1358					gene1412			gene3982	gene8222	gene9090
		GB42494					gene136					gene1413			gene3994	gene8224	gene9091
		GB42495					gene1360					gene1416			gene4001	gene8227	gene9101
		GB42496					gene1363					gene1417			gene4002	gene8234	gene9118
		GB42500					gene1364					gene1418			gene4003	gene8236	gene913
		GB42501					gene1367					gene1425			gene4005	gene8245	gene9136
		GB42505					gene1369					gene1428			gene4010	gene8255	gene9174
		GB42508					gene137					gene143			gene4016	gene8256	gene9175
		GB42515					gene1370					gene1436			gene4017	gene8257	gene9177
		GB42516					gene1375					gene1437			gene4023	gene8261	gene9186
		GB42519					gene1377					gene1438			gene4043	gene8266	gene919
		GB42520					gene1379					gene1440			gene4054	gene8274	gene9199
		GB42525					gene138					gene1441			gene4056	gene8285	gene9202
		GB42526					gene1383					gene1442			gene4062	gene8286	gene9209
		GB42527					gene1384					gene1445			gene4067	gene8288	gene9249
		GB42529					gene1386					gene1446			gene4068	gene8300	gene9255
		GB42534					gene1387					gene1450			gene4070	gene8305	gene93
		GB42538					gene1388					gene1455			gene4074	gene8318	gene9308
		GB42541					gene1390					gene1457			gene4076	gene8319	gene9311
		GB42543					gene1391					gene1458			gene4077	gene8322	gene9322
		GB42544					gene1392					gene146			gene4079	gene833	gene9328
		GB42549					gene1395					gene1460			gene4082	gene8339	gene9335
		GB42550					gene1398					gene1464			gene4084	gene8359	gene9336
		GB42551					gene14					gene1465			gene4100	gene8366	gene9339
		GB42553					gene140					gene1466			gene4105	gene8378	gene9340
		GB42555					gene1400					gene1468			gene4122	gene838	gene9349
		GB42558					gene1402					gene1470			gene4127	gene8383	gene9364
		GB42559					gene1405					gene1473			gene4131	gene8393	gene9369
		GB42560					gene1406					gene1474			gene4144	gene8413	gene9385
		GB42567					gene1407					gene1475			gene4146	gene8415	gene9398
		GB42576					gene1408					gene1476			gene4157	gene8425	gene940
		GB42577					gene1409					gene1478			gene4165	gene8429	gene9402
		GB42579					gene141					gene1479			gene4169	gene8459	gene9408
		GB42580					gene1412					gene148			gene4170	gene8461	gene943
		GB42584					gene1413					gene1480			gene4171	gene8477	gene9432
		GB42592					gene1416					gene149			gene4177	gene8499	gene9448
		GB42593					gene1417					gene1491			gene4180	gene8523	gene9462
		GB42603					gene1418					gene1492			gene4189	gene8531	gene9467
		GB42604					gene1425					gene1497			gene42	gene8534	gene9469
		GB42606					gene1428					gene1499			gene4203	gene8549	gene9488
		GB42607					gene143					gene15			gene4204	gene8550	gene9492
		GB42608					gene1436					gene1500			gene4206	gene8551	gene9498
		GB42613					gene1437					gene1501			gene4208	gene858	gene9499
		GB42614					gene1438					gene1502			gene4212	gene8599	gene950
		GB42621					gene1440					gene1503			gene4223	gene8605	gene9504
		GB42624					gene1441					gene1508			gene4228	gene8697	gene9508
		GB42628					gene1442					gene1509			gene4230	gene8699	gene9513
		GB42629					gene1445					gene151			gene4233	gene8723	gene9515
		GB42634					gene1446					gene1511			gene4235	gene8753	gene9519
		GB42644					gene1450					gene1512			gene4239	gene8757	gene9528
		GB42646					gene1455					gene1517			gene4240	gene8772	gene953
		GB42648					gene1457					gene1521			gene4242	gene8784	gene9541
		GB42649					gene1458					gene1522			gene4243	gene8813	gene9608
		GB42650					gene146					gene153			gene4244	gene8829	gene9615
		GB42651					gene1460					gene1531			gene4257	gene8835	gene9622
		GB42654					gene1464					gene1536			gene426	gene8839	gene9635
		GB42656					gene1465					gene1538			gene4260	gene8845	gene9641
		GB42659					gene1466					gene1544			gene4267	gene8854	gene9651
		GB42660					gene1468					gene1545			gene4273	gene8872	gene9659
		GB42661					gene1470					gene1547			gene4277	gene8888	gene9661
		GB42664					gene1473					gene1549			gene4287	gene8891	gene9662
		GB42666					gene1474					gene1550			gene4289	gene8906	gene9696
		GB42667					gene1475					gene1555			gene429	gene891	gene9697
		GB42669					gene1476					gene1556			gene4291	gene8913	gene9698
		GB42670					gene1478					gene1560			gene4296	gene8931	gene9701
		GB42671					gene1479					gene1563			gene4297	gene8933	gene9718
		GB42672					gene148					gene1564			gene4304	gene8936	gene9742
		GB42673					gene1480					gene1565			gene4309	gene8940	gene9746
		GB42674					gene149					gene1567			gene4317	gene8963	gene9767
		GB42675					gene1491					gene1568			gene4319	gene8976	gene977
		GB42678					gene1492					gene1573			gene4335	gene8979	gene9787
		GB42680					gene1497					gene1582			gene4336	gene898	gene9791
		GB42682					gene1499					gene1583			gene4339	gene8986	gene9793
		GB42683					gene15					gene1585			gene434	gene8996	gene9798
		GB42685					gene1500					gene1586			gene4342	gene9016	gene9812
		GB42689					gene1501					gene1588			gene4354	gene902	gene9817
		GB42691					gene1502					gene1589			gene4358	gene9025	gene9821
		GB42692					gene1503					gene159			gene4360	gene9029	gene9823
		GB42693					gene1508					gene1590			gene4363	gene9040	gene9836
		GB42694					gene1509					gene1593			gene437	gene9041	gene9839
		GB42698					gene151					gene1594			gene4373	gene9047	gene9855
		GB42704					gene1511					gene16			gene4377	gene9051	gene9863
		GB42705					gene1512					gene160			gene438	gene9053	gene9864
		GB42706					gene1517					gene1609			gene4380	gene9072	gene9869
		GB42707					gene1521					gene1610			gene4383	gene9077	gene9871
		GB42708					gene1522					gene1614			gene4393	gene9114	gene9877
		GB42714					gene153					gene1615			gene4396	gene9145	gene9882
		GB42715					gene1531					gene1616			gene4400	gene9155	gene989
		GB42716					gene1536					gene1623			gene4402	gene916	gene992
		GB42720					gene1538					gene1625			gene4404	gene9161	gene9936
		GB42721					gene1544					gene1627			gene4411	gene9167	gene9938
		GB42722					gene1545					gene1630			gene4414	gene9169	gene995
		GB42724					gene1547					gene1631			gene4416	gene917	gene9970
		GB42726					gene1549					gene1639			gene4417	gene9170	gene9978
		GB42728					gene1550					gene164			gene4418	gene920	gene9980
		GB42731					gene1555					gene165			gene4419	gene9201	gene9982
		GB42732					gene1556					gene1652			gene442	gene9204	gene9984
		GB42737					gene1560					gene1654			gene4422	gene9227
		GB42738					gene1563					gene1656			gene4425	gene9236
		GB42740					gene1564					gene1663			gene4427	gene9241
		GB42742					gene1565					gene1669			gene4430	gene9242
		GB42744					gene1567					gene1675			gene4432	gene9252
		GB42746					gene1568					gene1677			gene4435	gene9257
		GB42747					gene1573					gene1679			gene4442	gene926
		GB42748					gene1582					gene168			gene4443	gene9260
		GB42750					gene1583					gene1680			gene4444	gene9266
		GB42752					gene1585					gene1681			gene4449	gene9276
		GB42753					gene1586					gene1683			gene445	gene928
		GB42755					gene1588					gene1685			gene4453	gene9287
		GB42757					gene1589					gene1687			gene4458	gene929
		GB42758					gene159					gene1688			gene4463	gene9294
		GB42759					gene1590					gene169			gene4466	gene9299
		GB42763					gene1593					gene1690			gene4473	gene9301
		GB42764					gene1594					gene1692			gene4476	gene9304
		GB42769					gene16					gene1693			gene4478	gene9306
		GB42770					gene160					gene1702			gene4485	gene9312
		GB42771					gene1609					gene1703			gene4488	gene9313
		GB42773					gene1610					gene1704			gene4489	gene9315
		GB42776					gene1614					gene1709			gene4496	gene9316
		GB42779					gene1615					gene171			gene4497	gene932
		GB42781					gene1616					gene1711			gene4504	gene9321
		GB42784					gene1623					gene1712			gene4511	gene9324
		GB42785					gene1625					gene1713			gene4517	gene9325
		GB42786					gene1627					gene1717			gene4520	gene9330
		GB42787					gene1630					gene1718			gene4523	gene9355
		GB42793					gene1631					gene1719			gene4535	gene9359
		GB42794					gene1636					gene172			gene4536	gene9360
		GB42797					gene1639					gene1721			gene4537	gene9362
		GB42799					gene164					gene1722			gene4556	gene9363
		GB42804					gene165					gene1724			gene456	gene938
		GB42805					gene1652					gene1726			gene4560	gene9382
		GB42808					gene1654					gene1727			gene4564	gene9390
		GB42809					gene1656					gene1729			gene4566	gene9397
		GB42810					gene1663					gene173			gene4584	gene9400
		GB42811					gene1669					gene1731			gene4590	gene9404
		GB42812					gene1673					gene1733			gene4591	gene9409
		GB42814					gene1675					gene1741			gene4598	gene9412
		GB42816					gene1677					gene1747			gene4599	gene9417
		GB42817					gene1679					gene1748			gene4602	gene9419
		GB42819					gene168					gene1752			gene461	gene942
		GB42820					gene1680					gene1757			gene4615	gene9428
		GB42821					gene1681					gene1758			gene463	gene9431
		GB42822					gene1683					gene1759			gene4633	gene9435
		GB42824					gene1685					gene1760			gene464	gene9450
		GB42829					gene1687					gene1761			gene4641	gene9452
		GB42834					gene1688					gene1764			gene465	gene9460
		GB42835					gene169					gene1769			gene4655	gene9466
		GB42836					gene1690					gene177			gene4663	gene948
		GB42837					gene1692					gene1770			gene4665	gene9483
		GB42838					gene1693					gene1772			gene4667	gene9490
		GB42840					gene1702					gene1773			gene4669	gene952
		GB42841					gene1703					gene1778			gene4675	gene9523
		GB42844					gene1704					gene178			gene4677	gene9563
		GB42846					gene1709					gene1784			gene4678	gene9564
		GB42847					gene171					gene1785			gene4686	gene9565
		GB42848					gene1711					gene1786			gene4688	gene9567
		GB42849					gene1712					gene1790			gene4696	gene9569
		GB42850					gene1713					gene1796			gene4697	gene957
		GB42852					gene1717					gene1798			gene4701	gene9587
		GB42853					gene1718					gene1799			gene4702	gene9614
		GB42855					gene1719					gene180			gene4706	gene964
		GB42856					gene172					gene1800			gene4717	gene9643
		GB42858					gene1721					gene1803			gene4721	gene9648
		GB42859					gene1722					gene1805			gene4723	gene965
		GB42862					gene1724					gene1807			gene4734	gene9666
		GB42865					gene1726					gene181			gene474	gene9686
		GB42866					gene1727					gene1811			gene4743	gene9694
		GB42867					gene1729					gene1820			gene4761	gene9706
		GB42869					gene173					gene1824			gene4765	gene9736
		GB42872					gene1731					gene1827			gene4773	gene9741
		GB42874					gene1733					gene1829			gene4777	gene9745
		GB42875					gene1741					gene1830			gene4783	gene9748
		GB42879					gene1747					gene1832			gene4788	gene9753
		GB42880					gene1748					gene1833			gene4797	gene9754
		GB42881					gene1752					gene1834			gene4798	gene9777
		GB42884					gene1757					gene1836			gene4801	gene9800
		GB42885					gene1758					gene1837			gene4802	gene9810
		GB42888					gene1759					gene1838			gene4803	gene9818
		GB42892					gene1760					gene1839			gene4817	gene9825
		GB42894					gene1761					gene184			gene4829	gene9831
		GB42895					gene1764					gene1840			gene4830	gene9843
		GB42897					gene1769					gene1842			gene4832	gene9849
		GB42907					gene177					gene1843			gene4834	gene9852
		GB42908					gene1770					gene1846			gene4857	gene9875
		GB42917					gene1772					gene1853			gene4859	gene9876
		GB42919					gene1773					gene1855			gene487	gene9880
		GB42920					gene1778					gene1858			gene4871	gene9892
		GB42921					gene178					gene1859			gene4879	gene9904
		GB42923					gene1784					gene186			gene4884	gene9907
		GB42930					gene1785					gene1861			gene4892	gene9910
		GB42931					gene1786					gene1864			gene4896	gene9911
		GB42932					gene1790					gene1867			gene490	gene9914
		GB42933					gene1796					gene1868			gene4902	gene993
		GB42940					gene1798					gene1870			gene492	gene9930
		GB42941					gene1799					gene1873			gene4927	gene9931
		GB42942					gene180					gene1879			gene4933	gene9947
		GB42943					gene1800					gene1880			gene4953	gene9962
		GB42944					gene1803					gene1881			gene4959	gene9972
		GB42945					gene1805					gene1882			gene496	gene9975
		GB42949					gene1807					gene1887			gene4965	gene9979
		GB42957					gene181					gene1888			gene4966	gene9985
		GB42960					gene1811					gene1895			gene4971	gene9987
		GB42963					gene1820					gene1896			gene4973	gene9992
		GB42964					gene1824					gene1898			gene4989
		GB42965					gene1827					gene1901			gene4993
		GB42967					gene1829					gene1902			gene4994
		GB42969					gene1830					gene1903			gene4996
		GB42973					gene1832					gene1905			gene5019
		GB42976					gene1833					gene1906			gene5020
		GB42977					gene1834					gene1907			gene5034
		GB42979					gene1836					gene1914			gene5044
		GB42981					gene1837					gene195			gene5048
		GB42984					gene1838					gene196			gene507
		GB42985					gene1839					gene1984			gene5079
		GB42986					gene184					gene1986			gene5080
		GB42987					gene1840					gene1989			gene5081
		GB42994					gene1842					gene1990			gene5086
		GB42995					gene1843					gene1991			gene5089
		GB42997					gene1846					gene1995			gene5096
		GB43004					gene1848					gene1998			gene5102
		GB43015					gene1853					gene1999			gene5103
		GB43016					gene1855					gene2			gene5106
		GB43034					gene1858					gene2007			gene5107
		GB43035					gene1859					gene2009			gene5108
		GB43053					gene186					gene2013			gene5111
		GB43054					gene1861					gene2014			gene5112
		GB43074					gene1864					gene2015			gene5121
		GB43075					gene1867					gene2017			gene5122
		GB43076					gene1868					gene2018			gene5123
		GB43077					gene1870					gene2019			gene5127
		GB43080					gene1873					gene2023			gene5129
		GB43084					gene1879					gene203			gene5142
		GB43086					gene1880					gene2040			gene5145
		GB43087					gene1881					gene2052			gene5150
		GB43088					gene1882					gene2053			gene5156
		GB43089					gene1887					gene2055			gene5166
		GB43092					gene1888					gene2058			gene5172
		GB43095					gene1895					gene2061			gene5173
		GB43098					gene1896					gene2064			gene5188
		GB43100					gene1898					gene2067			gene5198
		GB43104					gene1901					gene2069			gene5201
		GB43105					gene1902					gene2070			gene5203
		GB43108					gene1903					gene2079			gene5206
		GB43111					gene1905					gene2080			gene5207
		GB43112					gene1906					gene2084			gene5219
		GB43113					gene1907					gene2086			gene5220
		GB43114					gene1914					gene2088			gene5227
		GB43115					gene195					gene2096			gene5244
		GB43116					gene196					gene2099			gene5246
		GB43117					gene1984					gene210			gene5250
		GB43118					gene1986					gene2102			gene5262
		GB43119					gene1989					gene2103			gene5275
		GB43120					gene1990					gene2104			gene5278
		GB43121					gene1991					gene2105			gene5286
		GB43122					gene1995					gene2111			gene5287
		GB43123					gene1998					gene2112			gene529
		GB43124					gene1999					gene2118			gene5300
		GB43125					gene2					gene212			gene5301
		GB43126					gene2007					gene2125			gene5303
		GB43128					gene2009					gene2128			gene5304
		GB43130					gene2013					gene2129			gene531
		GB43131					gene2014					gene2130			gene5310
		GB43132					gene2015					gene2131			gene5319
		GB43133					gene2017					gene2132			gene5323
		GB43134					gene2018					gene2135			gene5325
		GB43135					gene2019					gene2137			gene5331
		GB43138					gene2023					gene2142			gene5337
		GB43140					gene203					gene2144			gene5341
		GB43141					gene2040					gene2147			gene5342
		GB43143					gene2052					gene2150			gene5343
		GB43145					gene2053					gene2152			gene5354
		GB43147					gene2055					gene2154			gene5361
		GB43149					gene2058					gene2158			gene5382
		GB43150					gene2061					gene2159			gene5384
		GB43153					gene2064					gene216			gene539
		GB43154					gene2067					gene2160			gene5391
		GB43155					gene2069					gene2161			gene5393
		GB43157					gene2070					gene2162			gene5401
		GB43158					gene2079					gene2163			gene5405
		GB43159					gene2080					gene2164			gene542
		GB43160					gene2084					gene2169			gene5422
		GB43161					gene2086					gene2170			gene5431
		GB43162					gene2088					gene2174			gene5433
		GB43163					gene2096					gene2175			gene5436
		GB43165					gene2099					gene2179			gene5438
		GB43168					gene210					gene2180			gene5450
		GB43171					gene2102					gene2182			gene5451
		GB43172					gene2103					gene2183			gene5454
		GB43173					gene2104					gene2187			gene5456
		GB43175					gene2105					gene2192			gene5458
		GB43176					gene2111					gene2193			gene5459
		GB43178					gene2112					gene2194			gene5461
		GB43179					gene2118					gene2195			gene5465
		GB43180					gene212					gene2196			gene5466
		GB43184					gene2125					gene2197			gene5473
		GB43185					gene2128					gene2199			gene5482
		GB43186					gene2129					gene2202			gene5483
		GB43188					gene2130					gene2208			gene5496
		GB43189					gene2131					gene2210			gene550
		GB43191					gene2132					gene2211			gene5511
		GB43192					gene2135					gene2215			gene5514
		GB43193					gene2137					gene222			gene5515
		GB43195					gene2142					gene2225			gene5517
		GB43198					gene2144					gene2226			gene5520
		GB43200					gene2147					gene2227			gene5530
		GB43203					gene2150					gene223			gene5534
		GB43207					gene2152					gene2231			gene5541
		GB43208					gene2154					gene2238			gene5555
		GB43210					gene2158					gene2241			gene5559
		GB43212					gene2159					gene2243			gene5565
		GB43216					gene216					gene2246			gene5567
		GB43217					gene2160					gene2247			gene5570
		GB43218					gene2161					gene2248			gene5571
		GB43219					gene2162					gene225			gene5572
		GB43220					gene2163					gene2251			gene5581
		GB43223					gene2164					gene2255			gene5589
		GB43225					gene2169					gene2258			gene559
		GB43226					gene2170					gene226			gene5591
		GB43228					gene2174					gene2263			gene5594
		GB43229					gene2175					gene2266			gene5599
		GB43231					gene2179					gene2269			gene5600
		GB43232					gene2180					gene227			gene5606
		GB43234					gene2182					gene2271			gene561
		GB43236					gene2183					gene2274			gene5611
		GB43237					gene2187					gene2275			gene5613
		GB43238					gene2192					gene2276			gene5614
		GB43239					gene2193					gene2277			gene5616
		GB43245					gene2194					gene2278			gene5621
		GB43246					gene2195					gene2283			gene565
		GB43247					gene2196					gene2284			gene5660
		GB43256					gene2197					gene2285			gene5674
		GB43258					gene2199					gene2286			gene5684
		GB43260					gene2202					gene2287			gene5687
		GB43261					gene2208					gene2289			gene569
		GB43263					gene2210					gene2290			gene5693
		GB43264					gene2211					gene2291			gene5694
		GB43265					gene2215					gene2293			gene5699
		GB43270					gene222					gene2295			gene570
		GB43276					gene2225					gene2298			gene5702
		GB43277					gene2226					gene2303			gene5704
		GB43280					gene2227					gene2305			gene571
		GB43282					gene223					gene2307			gene5715
		GB43285					gene2231					gene2308			gene5716
		GB43287					gene2238					gene2309			gene5720
		GB43292					gene2241					gene2311			gene5721
		GB43293					gene2243					gene2312			gene5726
		GB43295					gene2246					gene2314			gene5728
		GB43300					gene2247					gene2317			gene574
		GB43301					gene2248					gene2318			gene5740
		GB43302					gene225					gene2319			gene5741
		GB43303					gene2251					gene232			gene5742
		GB43304					gene2255					gene2321			gene5743
		GB43305					gene2258					gene2322			gene5744
		GB43314					gene226					gene233			gene5748
		GB43315					gene2263					gene2333			gene575
		GB43316					gene2266					gene234			gene5751
		GB43329					gene2269					gene2340			gene5756
		GB43332					gene227					gene2341			gene5758
		GB43338					gene2271					gene2342			gene5766
		GB43353					gene2274					gene2343			gene578
		GB43365					gene2275					gene2346			gene579
		GB43366					gene2276					gene2347			gene5792
		GB43369					gene2277					gene2348			gene5793
		GB43375					gene2278					gene2349			gene5798
		GB43377					gene2283					gene2352			gene5806
		GB43378					gene2284					gene2358			gene5813
		GB43379					gene2285					gene2359			gene5814
		GB43389					gene2286					gene236			gene5817
		GB43390					gene2287					gene2360			gene582
		GB43392					gene2289					gene2365			gene5821
		GB43393					gene2290					gene2369			gene5823
		GB43401					gene2291					gene2375			gene5824
		GB43403					gene2293					gene2376			gene5829
		GB43407					gene2295					gene2377			gene583
		GB43409					gene2298					gene2378			gene5838
		GB43411					gene2303					gene238			gene5855
		GB43416					gene2305					gene2380			gene5857
		GB43417					gene2307					gene2381			gene5863
		GB43419					gene2308					gene2382			gene5868
		GB43420					gene2309					gene2383			gene587
		GB43421					gene2311					gene2384			gene5879
		GB43422					gene2312					gene2385			gene588
		GB43427					gene2314					gene2386			gene5885
		GB43429					gene2317					gene2387			gene5887
		GB43434					gene2318					gene2389			gene5891
		GB43437					gene2319					gene2390			gene5894
		GB43438					gene232					gene2391			gene5895
		GB43439					gene2321					gene2392			gene5897
		GB43441					gene2322					gene2393			gene5899
		GB43443					gene233					gene2394			gene5907
		GB43444					gene2333					gene2395			gene591
		GB43446					gene234					gene2396			gene594
		GB43448					gene2340					gene2399			gene5940
		GB43453					gene2341					gene240			gene5942
		GB43456					gene2342					gene2402			gene5943
		GB43459					gene2343					gene2403			gene5956
		GB43462					gene2346					gene2411			gene5957
		GB43463					gene2347					gene2412			gene5959
		GB43464					gene2348					gene2413			gene5963
		GB43466					gene2349					gene2414			gene5968
		GB43467					gene2352					gene2415			gene5971
		GB43470					gene2358					gene2418			gene5984
		GB43476					gene2359					gene2419			gene5987
		GB43478					gene236					gene2420			gene5989
		GB43481					gene2360					gene2421			gene5990
		GB43483					gene2365					gene2423			gene5999
		GB43485					gene2369					gene2426			gene6
		GB43486					gene2375					gene2427			gene6004
		GB43487					gene2376					gene2428			gene6010
		GB43495					gene2377					gene2429			gene6012
		GB43497					gene2378					gene243			gene6014
		GB43500					gene238					gene2431			gene6022
		GB43502					gene2380					gene2432			gene6037
		GB43504					gene2381					gene2433			gene6048
		GB43507					gene2382					gene2435			gene605
		GB43508					gene2383					gene2436			gene6054
		GB43520					gene2384					gene2438			gene6063
		GB43521					gene2385					gene2439			gene6067
		GB43526					gene2386					gene2441			gene607
		GB43540					gene2387					gene2442			gene6073
		GB43543					gene2389					gene2443			gene6075
		GB43544					gene2390					gene2448			gene6077
		GB43546					gene2391					gene2449			gene6079
		GB43548					gene2392					gene245			gene6086
		GB43549					gene2393					gene2452			gene6087
		GB43551					gene2394					gene246			gene6097
		GB43553					gene2395					gene2465			gene610
		GB43555					gene2396					gene2466			gene6101
		GB43559					gene2399					gene2470			gene6105
		GB43561					gene240					gene2475			gene6112
		GB43562					gene2402					gene2477			gene6114
		GB43563					gene2403					gene249			gene6115
		GB43564					gene2411					gene2496			gene6117
		GB43565					gene2412					gene2497			gene6128
		GB43569					gene2413					gene2499			gene6129
		GB43574					gene2414					gene2501			gene6137
		GB43575					gene2415					gene2503			gene6138
		GB43579					gene2418					gene2507			gene6149
		GB43580					gene2419					gene2509			gene615
		GB43581					gene2420					gene2512			gene6159
		GB43584					gene2421					gene2514			gene616
		GB43586					gene2423					gene2516			gene6161
		GB43591					gene2426					gene2521			gene6162
		GB43602					gene2427					gene2522			gene6170
		GB43606					gene2428					gene2523			gene6173
		GB43611					gene2429					gene2524			gene6176
		GB43613					gene243					gene253			gene6189
		GB43617					gene2431					gene2531			gene6199
		GB43618					gene2432					gene2533			gene6201
		GB43621					gene2433					gene2534			gene6205
		GB43622					gene2435					gene2535			gene6208
		GB43623					gene2436					gene2537			gene6211
		GB43624					gene2438					gene254			gene6216
		GB43625					gene2439					gene2543			gene6219
		GB43626					gene2441					gene2545			gene6223
		GB43628					gene2442					gene2546			gene6225
		GB43631					gene2443					gene2548			gene6227
		GB43635					gene2448					gene2552			gene6228
		GB43637					gene2449					gene2553			gene6229
		GB43640					gene245					gene2554			gene6230
		GB43662					gene2452					gene2559			gene6234
		GB43676					gene246					gene2560			gene6237
		GB43684					gene2465					gene2568			gene624
		GB43687					gene2466					gene2572			gene6248
		GB43691					gene2470					gene2579			gene6258
		GB43692					gene2475					gene2581			gene6260
		GB43697					gene2477					gene2586			gene6261
		GB43702					gene249					gene2591			gene6265
		GB43704					gene2496					gene2596			gene6271
		GB43706					gene2497					gene2597			gene6281
		GB43707					gene2499					gene2598			gene6294
		GB43711					gene2501					gene2602			gene6295
		GB43712					gene2503					gene2603			gene6313
		GB43715					gene2507					gene2604			gene6319
		GB43716					gene2509					gene2605			gene6320
		GB43719					gene2511					gene2606			gene6323
		GB43722					gene2512					gene2610			gene6326
		GB43727					gene2514					gene2611			gene6337
		GB43729					gene2516					gene2612			gene6347
		GB43730					gene2521					gene2616			gene6349
		GB43732					gene2522					gene2617			gene6359
		GB43736					gene2523					gene2619			gene636
		GB43737					gene2524					gene2620			gene6364
		GB43738					gene253					gene2621			gene6365
		GB43739					gene2531					gene2622			gene6366
		GB43742					gene2533					gene2624			gene6367
		GB43743					gene2534					gene2627			gene6369
		GB43750					gene2535					gene2628			gene6370
		GB43755					gene2537					gene2629			gene6378
		GB43761					gene254					gene263			gene6379
		GB43770					gene2543					gene2630			gene6385
		GB43771					gene2545					gene2631			gene6389
		GB43772					gene2546					gene2634			gene6392
		GB43778					gene2548					gene2637			gene6395
		GB43782					gene2552					gene264			gene6398
		GB43786					gene2553					gene2640			gene6402
		GB43789					gene2554					gene2641			gene6406
		GB43790					gene2559					gene2644			gene6410
		GB43805					gene2560					gene2646			gene6411
		GB43809					gene2568					gene2647			gene6417
		GB43812					gene2572					gene2648			gene642
		GB43813					gene2579					gene2652			gene6433
		GB43816					gene2581					gene2655			gene6437
		GB43819					gene2586					gene2660			gene644
		GB43820					gene2591					gene2661			gene6440
		GB43823					gene2596					gene2666			gene6447
		GB43825					gene2597					gene2668			gene6459
		GB43828					gene2598					gene2673			gene6460
		GB43831					gene2602					gene2675			gene6462
		GB43839					gene2603					gene2676			gene6475
		GB43840					gene2604					gene2677			gene6478
		GB43844					gene2605					gene2682			gene6489
		GB43848					gene2606					gene269			gene6500
		GB43851					gene2610					gene2691			gene6506
		GB43852					gene2611					gene2693			gene6509
		GB43855					gene2612					gene2694			gene6510
		GB43856					gene2616					gene2695			gene6513
		GB43857					gene2617					gene2696			gene6518
		GB43858					gene2619					gene2699			gene6519
		GB43860					gene2620					gene2700			gene6533
		GB43863					gene2621					gene2701			gene6545
		GB43867					gene2622					gene2702			gene6550
		GB43868					gene2624					gene2705			gene6558
		GB43871					gene2627					gene2707			gene656
		GB43872					gene2628					gene2708			gene6561
		GB43873					gene2629					gene2709			gene6564
		GB43874					gene263					gene2710			gene6571
		GB43876					gene2630					gene2714			gene6577
		GB43877					gene2631					gene2715			gene658
		GB43879					gene2634					gene2717			gene6580
		GB43882					gene2637					gene272			gene6585
		GB43883					gene264					gene2720			gene6588
		GB43884					gene2640					gene2722			gene6590
		GB43887					gene2641					gene2723			gene6592
		GB43888					gene2644					gene2724			gene6594
		GB43889					gene2646					gene2725			gene6595
		GB43890					gene2647					gene2728			gene6599
		GB43891					gene2648					gene2734			gene660
		GB43892					gene2652					gene2735			gene6601
		GB43894					gene2655					gene2743			gene6604
		GB43897					gene2660					gene2746			gene6607
		GB43899					gene2661					gene2748			gene6608
		GB43900					gene2666					gene275			gene6609
		GB43901					gene2668					gene2752			gene662
		GB43904					gene2673					gene2754			gene663
		GB43905					gene2675					gene2756			gene6636
		GB43906					gene2676					gene2757			gene6638
		GB43908					gene2677					gene2759			gene6639
		GB43909					gene2682					gene276			gene6643
		GB43912					gene269					gene2760			gene6648
		GB43913					gene2691					gene2762			gene665
		GB43916					gene2693					gene2763			gene6650
		GB43917					gene2694					gene2765			gene6657
		GB43920					gene2695					gene2766			gene6658
		GB43921					gene2696					gene2768			gene666
		GB43935					gene2699					gene2774			gene6667
		GB43938					gene2700					gene2777			gene6671
		GB43942					gene2701					gene2778			gene6673
		GB43945					gene2702					gene278			gene668
		GB43951					gene2705					gene2780			gene6681
		GB43952					gene2707					gene2781			gene6693
		GB43953					gene2708					gene2783			gene6697
		GB43954					gene2709					gene2784			gene6698
		GB43960					gene2710					gene2786			gene671
		GB43963					gene2714					gene2788			gene6712
		GB43964					gene2715					gene2792			gene6717
		GB43968					gene2717					gene2794			gene6720
		GB43978					gene272					gene2795			gene6721
		GB43980					gene2720					gene2798			gene6723
		GB43983					gene2722					gene2799			gene6747
		GB43984					gene2723					gene28			gene6754
		GB43989					gene2724					gene2800			gene6757
		GB43990					gene2725					gene2801			gene6758
		GB44000					gene2728					gene2804			gene6760
		GB44002					gene2734					gene281			gene6763
		GB44005					gene2735					gene2813			gene6766
		GB44006					gene274					gene2816			gene6769
		GB44009					gene2743					gene2817			gene677
		GB44010					gene2746					gene2819			gene6771
		GB44011					gene2748					gene282			gene6781
		GB44017					gene275					gene2822			gene6788
		GB44019					gene2752					gene2827			gene6791
		GB44020					gene2753					gene283			gene6792
		GB44027					gene2754					gene2831			gene6800
		GB44028					gene2756					gene2832			gene6802
		GB44030					gene2757					gene2833			gene6807
		GB44032					gene2759					gene2834			gene6810
		GB44033					gene276					gene2837			gene6816
		GB44035					gene2760					gene2839			gene6818
		GB44037					gene2762					gene2841			gene6819
		GB44039					gene2763					gene2842			gene6829
		GB44041					gene2765					gene2845			gene6830
		GB44043					gene2766					gene2848			gene684
		GB44044					gene2768					gene2849			gene6842
		GB44045					gene2774					gene2850			gene6857
		GB44048					gene2777					gene2852			gene686
		GB44049					gene2778					gene2855			gene6866
		GB44052					gene278					gene2856			gene6868
		GB44053					gene2780					gene2857			gene6869
		GB44055					gene2781					gene2858			gene689
		GB44056					gene2783					gene2867			gene6896
		GB44058					gene2784					gene2871			gene6897
		GB44059					gene2786					gene2873			gene6905
		GB44060					gene2788					gene2874			gene6907
		GB44061					gene2792					gene2875			gene6915
		GB44062					gene2794					gene2877			gene6926
		GB44064					gene2795					gene2878			gene6929
		GB44067					gene2798					gene2883			gene6935
		GB44069					gene2799					gene2885			gene694
		GB44072					gene28					gene2886			gene6940
		GB44073					gene2800					gene2891			gene695
		GB44077					gene2801					gene2892			gene6953
		GB44078					gene2804					gene2893			gene6959
		GB44079					gene281					gene2897			gene6965
		GB44080					gene2813					gene2898			gene697
		GB44081					gene2816					gene2900			gene6977
		GB44082					gene2817					gene2901			gene698
		GB44083					gene2819					gene2902			gene699
		GB44084					gene282					gene2903			gene6992
		GB44085					gene2822					gene2904			gene6995
		GB44086					gene2827					gene2908			gene6998
		GB44091					gene283					gene2909			gene7004
		GB44096					gene2831					gene2910			gene7008
		GB44097					gene2832					gene2916			gene7009
		GB44101					gene2833					gene2919			gene7011
		GB44103					gene2834					gene2920			gene7014
		GB44104					gene2837					gene2922			gene7016
		GB44109					gene2839					gene2924			gene7019
		GB44110					gene2841					gene2930			gene7029
		GB44113					gene2842					gene2932			gene7030
		GB44115					gene2845					gene2933			gene7033
		GB44116					gene2848					gene2934			gene7034
		GB44119					gene2849					gene2935			gene7042
		GB44120					gene2850					gene2939			gene7046
		GB44122					gene2852					gene294			gene7050
		GB44123					gene2855					gene2941			gene7051
		GB44124					gene2856					gene2942			gene7057
		GB44125					gene2857					gene2944			gene7058
		GB44127					gene2858					gene2947			gene7066
		GB44129					gene2867					gene2949			gene7082
		GB44130					gene2871					gene2960			gene7083
		GB44131					gene2873					gene2975			gene7085
		GB44132					gene2874					gene2978			gene7086
		GB44136					gene2875					gene298			gene7087
		GB44138					gene2877					gene2980			gene7089
		GB44139					gene2878					gene2987			gene709
		GB44140					gene2883					gene2988			gene7093
		GB44141					gene2885					gene2989			gene710
		GB44143					gene2886					gene299			gene7102
		GB44144					gene2891					gene2992			gene7114
		GB44146					gene2892					gene2993			gene7115
		GB44148					gene2893					gene2995			gene7116
		GB44152					gene2897					gene2996			gene7126
		GB44154					gene2898					gene2997			gene7161
		GB44155					gene2900					gene2998			gene7162
		GB44156					gene2901					gene3			gene7163
		GB44157					gene2902					gene300			gene7165
		GB44159					gene2903					gene3000			gene7167
		GB44160					gene2904					gene3001			gene7174
		GB44163					gene2907					gene3002			gene7175
		GB44166					gene2908					gene3004			gene7180
		GB44169					gene2909					gene3007			gene7181
		GB44170					gene2910					gene3011			gene7198
		GB44172					gene2916					gene3012			gene7199
		GB44174					gene2919					gene3014			gene7205
		GB44175					gene2920					gene3016			gene7215
		GB44176					gene2922					gene3017			gene7218
		GB44177					gene2924					gene3019			gene7235
		GB44179					gene2930					gene302			gene7241
		GB44180					gene2932					gene3020			gene7247
		GB44181					gene2933					gene3023			gene7253
		GB44183					gene2934					gene3024			gene7262
		GB44184					gene2935					gene3025			gene7263
		GB44186					gene2939					gene3026			gene7264
		GB44187					gene294					gene3027			gene7272
		GB44188					gene2941					gene3032			gene7277
		GB44189					gene2942					gene3034			gene728
		GB44191					gene2944					gene3036			gene7280
		GB44192					gene2947					gene3038			gene729
		GB44193					gene2949					gene304			gene7290
		GB44197					gene2960					gene3041			gene7291
		GB44198					gene2975					gene3043			gene730
		GB44199					gene2978					gene3049			gene7308
		GB44203					gene298					gene3050			gene731
		GB44204					gene2980					gene3051			gene7312
		GB44207					gene2982					gene3052			gene7316
		GB44208					gene2987					gene3053			gene7318
		GB44209					gene2988					gene3057			gene7319
		GB44210					gene2989					gene3058			gene7330
		GB44211					gene299					gene3060			gene7342
		GB44213					gene2992					gene3061			gene7347
		GB44216					gene2993					gene3066			gene735
		GB44220					gene2995					gene3068			gene7351
		GB44222					gene2996					gene3077			gene7353
		GB44223					gene2997					gene3091			gene7362
		GB44225					gene2998					gene3094			gene7369
		GB44229					gene3					gene3096			gene7377
		GB44232					gene300					gene31			gene7381
		GB44233					gene3000					gene3103			gene7386
		GB44237					gene3001					gene3104			gene739
		GB44247					gene3002					gene3109			gene7395
		GB44248					gene3004					gene311			gene740
		GB44250					gene3007					gene3113			gene7402
		GB44251					gene3011					gene3115			gene7404
		GB44252					gene3012					gene3124			gene7405
		GB44254					gene3014					gene3127			gene7409
		GB44259					gene3016					gene3129			gene741
		GB44262					gene3017					gene3130			gene7415
		GB44263					gene3019					gene3131			gene7421
		GB44271					gene302					gene3134			gene7423
		GB44276					gene3020					gene3135			gene7426
		GB44279					gene3023					gene3136			gene7430
		GB44280					gene3024					gene3140			gene744
		GB44281					gene3025					gene3141			gene7443
		GB44285					gene3026					gene3142			gene7444
		GB44287					gene3027					gene3147			gene7447
		GB44289					gene3032					gene3150			gene7454
		GB44291					gene3034					gene3152			gene7455
		GB44292					gene3036					gene316			gene7463
		GB44293					gene3038					gene3160			gene7465
		GB44295					gene304					gene3163			gene7470
		GB44296					gene3041					gene3165			gene7473
		GB44297					gene3043					gene3166			gene7474
		GB44299					gene3049					gene3168			gene7475
		GB44300					gene3050					gene3169			gene7478
		GB44302					gene3051					gene3175			gene7487
		GB44303					gene3052					gene3179			gene7488
		GB44304					gene3053					gene318			gene750
		GB44305					gene3057					gene3180			gene7500
		GB44306					gene3058					gene3182			gene7504
		GB44307					gene3060					gene3183			gene753
		GB44312					gene3061					gene3184			gene7542
		GB44313					gene3066					gene3185			gene7554
		GB44315					gene3068					gene3189			gene7555
		GB44316					gene3077					gene319			gene7558
		GB44319					gene3091					gene3191			gene756
		GB44321					gene3094					gene3192			gene7560
		GB44325					gene3096					gene3193			gene757
		GB44327					gene31					gene3196			gene7585
		GB44328					gene3103					gene3197			gene7596
		GB44329					gene3104					gene3200			gene7609
		GB44330					gene3109					gene3201			gene7640
		GB44331					gene311					gene3202			gene7645
		GB44336					gene3113					gene3205			gene7647
		GB44337					gene3115					gene3209			gene765
		GB44338					gene3124					gene3210			gene7651
		GB44343					gene3127					gene3211			gene7656
		GB44344					gene3129					gene3213			gene7657
		GB44345					gene3130					gene3214			gene766
		GB44346					gene3131					gene3217			gene7661
		GB44347					gene3134					gene3218			gene7665
		GB44349					gene3135					gene3220			gene7666
		GB44350					gene3136					gene3222			gene7670
		GB44351					gene3140					gene3223			gene7681
		GB44353					gene3141					gene3225			gene7682
		GB44354					gene3142					gene3226			gene769
		GB44356					gene3147					gene3228			gene7694
		GB44359					gene3150					gene3229			gene7695
		GB44361					gene3152					gene323			gene7696
		GB44365					gene316					gene3231			gene7698
		GB44366					gene3160					gene3233			gene7701
		GB44369					gene3163					gene3236			gene7705
		GB44373					gene3165					gene3237			gene7709
		GB44383					gene3166					gene3238			gene7723
		GB44387					gene3168					gene324			gene7725
		GB44396					gene3169					gene3240			gene7732
		GB44397					gene3175					gene3241			gene7736
		GB44400					gene3179					gene3243			gene7737
		GB44402					gene318					gene3245			gene7739
		GB44404					gene3180					gene3246			gene7752
		GB44410					gene3182					gene3247			gene7754
		GB44411					gene3183					gene325			gene7756
		GB44412					gene3184					gene3250			gene7757
		GB44414					gene3185					gene3253			gene7759
		GB44415					gene3189					gene3261			gene7761
		GB44416					gene319					gene327			gene7767
		GB44418					gene3191					gene3271			gene777
		GB44419					gene3192					gene328			gene778
		GB44420					gene3193					gene3280			gene7780
		GB44421					gene3196					gene3283			gene7786
		GB44422					gene3197					gene3284			gene7796
		GB44423					gene3200					gene3289			gene7798
		GB44424					gene3201					gene3291			gene7801
		GB44425					gene3202					gene3294			gene7804
		GB44426					gene3205					gene3297			gene7806
		GB44428					gene3209					gene3298			gene7807
		GB44429					gene3210					gene3299			gene7816
		GB44431					gene3211					gene3301			gene7818
		GB44432					gene3213					gene3302			gene7823
		GB44433					gene3214					gene3305			gene784
		GB44436					gene3217					gene3306			gene7840
		GB44439					gene3218					gene3328			gene7846
		GB44440					gene3220					gene3334			gene7851
		GB44442					gene3222					gene3335			gene786
		GB44444					gene3223					gene3337			gene7865
		GB44445					gene3225					gene3338			gene7868
		GB44449					gene3226					gene3339			gene7869
		GB44450					gene3228					gene3341			gene7873
		GB44455					gene3229					gene3342			gene7876
		GB44457					gene323					gene3343			gene7883
		GB44460					gene3231					gene3345			gene7893
		GB44461					gene3233					gene3346			gene7899
		GB44462					gene3236					gene3348			gene7901
		GB44464					gene3237					gene3351			gene7910
		GB44467					gene3238					gene3352			gene7925
		GB44469					gene324					gene3354			gene7926
		GB44482					gene3240					gene3355			gene7930
		GB44483					gene3241					gene3358			gene7934
		GB44485					gene3243					gene3359			gene7935
		GB44486					gene3245					gene3360			gene7937
		GB44490					gene3246					gene3361			gene7941
		GB44493					gene3247					gene3368			gene7942
		GB44494					gene3249					gene3370			gene7947
		GB44495					gene325					gene3373			gene7949
		GB44496					gene3250					gene3377			gene7954
		GB44498					gene3253					gene338			gene7956
		GB44500					gene3261					gene339			gene7959
		GB44506					gene327					gene3406			gene7963
		GB44507					gene3271					gene3407			gene7978
		GB44509					gene328					gene3411			gene7981
		GB44510					gene3280					gene3415			gene7983
		GB44511					gene3283					gene3416			gene7984
		GB44512					gene3284					gene342			gene7986
		GB44513					gene3289					gene3420			gene7988
		GB44514					gene3291					gene3429			gene7989
		GB44515					gene3294					gene343			gene7991
		GB44516					gene3297					gene3433			gene7992
		GB44517					gene3298					gene3438			gene7999
		GB44518					gene3299					gene3439			gene800
		GB44519					gene3301					gene344			gene801
		GB44521					gene3302					gene3440			gene8010
		GB44523					gene3305					gene3442			gene8015
		GB44524					gene3306					gene3443			gene8019
		GB44526					gene3328					gene3444			gene8021
		GB44528					gene3334					gene3445			gene8025
		GB44531					gene3335					gene3448			gene8037
		GB44532					gene3337					gene3449			gene8041
		GB44533					gene3338					gene3452			gene8043
		GB44534					gene3339					gene3456			gene8044
		GB44535					gene3341					gene3460			gene8052
		GB44536					gene3342					gene3461			gene8054
		GB44537					gene3343					gene3462			gene8062
		GB44538					gene3345					gene3463			gene8069
		GB44539					gene3346					gene3465			gene807
		GB44540					gene3348					gene3466			gene8070
		GB44541					gene3351					gene347			gene8071
		GB44544					gene3352					gene3473			gene8080
		GB44548					gene3354					gene3475			gene8084
		GB44549					gene3355					gene3481			gene8088
		GB44550					gene3358					gene3482			gene8090
		GB44553					gene3359					gene3484			gene8092
		GB44555					gene3360					gene3485			gene8095
		GB44556					gene3361					gene3486			gene8096
		GB44557					gene3368					gene3488			gene8098
		GB44558					gene3370					gene3489			gene81
		GB44559					gene3373					gene3491			gene810
		GB44564					gene3377					gene3493			gene8109
		GB44567					gene338					gene3498			gene811
		GB44570					gene339					gene35			gene8116
		GB44572					gene3406					gene3500			gene8124
		GB44573					gene3407					gene3501			gene8126
		GB44575					gene3411					gene3504			gene8131
		GB44576					gene3415					gene3505			gene8132
		GB44578					gene3416					gene3506			gene8134
		GB44579					gene342					gene3507			gene814
		GB44580					gene3420					gene3508			gene8140
		GB44581					gene3429					gene3509			gene8152
		GB44585					gene343					gene3511			gene8153
		GB44586					gene3433					gene3514			gene8154
		GB44590					gene3438					gene3515			gene8162
		GB44592					gene3439					gene3516			gene8166
		GB44594					gene344					gene3518			gene8171
		GB44595					gene3440					gene3522			gene8174
		GB44596					gene3442					gene3524			gene8181
		GB44597					gene3443					gene3525			gene8182
		GB44598					gene3444					gene3527			gene8184
		GB44601					gene3445					gene3562			gene8190
		GB44609					gene3448					gene357			gene8195
		GB44611					gene3449					gene3573			gene8197
		GB44614					gene3452					gene3575			gene8202
		GB44615					gene3456					gene3582			gene8207
		GB44616					gene3460					gene3583			gene8209
		GB44621					gene3461					gene3602			gene8210
		GB44623					gene3462					gene3603			gene8211
		GB44624					gene3463					gene3606			gene822
		GB44626					gene3465					gene3610			gene8222
		GB44629					gene3466					gene3612			gene8223
		GB44634					gene347					gene3613			gene8224
		GB44636					gene3473					gene3614			gene8227
		GB44638					gene3475					gene3615			gene823
		GB44640					gene3481					gene3616			gene8234
		GB44642					gene3482					gene3622			gene8236
		GB44643					gene3484					gene3629			gene8245
		GB44646					gene3485					gene363			gene8248
		GB44647					gene3486					gene3630			gene8253
		GB44648					gene3488					gene3631			gene8255
		GB44649					gene3489					gene3634			gene8256
		GB44650					gene3491					gene3642			gene8257
		GB44651					gene3493					gene3651			gene8258
		GB44653					gene3498					gene3661			gene8259
		GB44656					gene35					gene3669			gene8261
		GB44658					gene3500					gene3670			gene8266
		GB44659					gene3501					gene3671			gene8274
		GB44660					gene3504					gene3674			gene8285
		GB44661					gene3505					gene3678			gene8286
		GB44662					gene3506					gene3680			gene8288
		GB44663					gene3507					gene3681			gene8300
		GB44670					gene3508					gene3685			gene8302
		GB44671					gene3509					gene3687			gene8305
		GB44673					gene3511					gene3694			gene8318
		GB44674					gene3514					gene3699			gene8319
		GB44676					gene3515					gene37			gene8321
		GB44678					gene3516					gene3701			gene8322
		GB44679					gene3518					gene3702			gene8325
		GB44680					gene3522					gene3712			gene8328
		GB44682					gene3524					gene3715			gene833
		GB44684					gene3525					gene3716			gene8338
		GB44685					gene3527					gene3717			gene8339
		GB44687					gene3562					gene3718			gene8359
		GB44688					gene357					gene3720			gene8366
		GB44689					gene3573					gene3722			gene8378
		GB44690					gene3575					gene3728			gene838
		GB44692					gene3582					gene373			gene8383
		GB44693					gene3583					gene3732			gene8393
		GB44697					gene3602					gene3736			gene8413
		GB44703					gene3603					gene3737			gene8415
		GB44705					gene3606					gene3738			gene8425
		GB44709					gene3610					gene374			gene8426
		GB44710					gene3612					gene3742			gene8428
		GB44718					gene3613					gene3743			gene8429
		GB44723					gene3614					gene3744			gene8436
		GB44726					gene3615					gene3750			gene8439
		GB44731					gene3616					gene3751			gene8458
		GB44732					gene3620					gene3752			gene8459
		GB44735					gene3622					gene3757			gene8461
		GB44739					gene3629					gene3758			gene8477
		GB44742					gene363					gene3759			gene8498
		GB44743					gene3630					gene376			gene8499
		GB44744					gene3631					gene3761			gene8503
		GB44745					gene3634					gene3762			gene8511
		GB44746					gene3642					gene3763			gene8514
		GB44747					gene3646					gene3765			gene8515
		GB44749					gene3651					gene3766			gene8523
		GB44751					gene3652					gene3767			gene8528
		GB44753					gene3661					gene3769			gene8531
		GB44755					gene3669					gene3770			gene8534
		GB44757					gene367					gene3771			gene8539
		GB44758					gene3670					gene3772			gene8541
		GB44759					gene3671					gene3774			gene8549
		GB44761					gene3674					gene3775			gene8550
		GB44762					gene3678					gene3778			gene8551
		GB44763					gene3680					gene3779			gene8555
		GB44764					gene3681					gene3785			gene8567
		GB44769					gene3685					gene3788			gene8569
		GB44771					gene3687					gene3793			gene8570
		GB44772					gene3694					gene3795			gene8571
		GB44773					gene3699					gene3796			gene8577
		GB44774					gene37					gene3797			gene858
		GB44776					gene3701					gene3798			gene8584
		GB44777					gene3702					gene3799			gene8597
		GB44779					gene3712					gene3800			gene8599
		GB44780					gene3715					gene3801			gene8602
		GB44781					gene3716					gene3802			gene8605
		GB44782					gene3717					gene3803			gene861
		GB44786					gene3718					gene3804			gene8617
		GB44787					gene3720					gene3806			gene8618
		GB44789					gene3722					gene3807			gene8639
		GB44791					gene3728					gene381			gene8675
		GB44792					gene373					gene3810			gene8678
		GB44798					gene3732					gene3814			gene8684
		GB44799					gene3736					gene3819			gene8685
		GB44800					gene3737					gene3820			gene8692
		GB44802					gene3738					gene3822			gene8697
		GB44804					gene374					gene3825			gene8698
		GB44808					gene3742					gene3827			gene8699
		GB44812					gene3743					gene3830			gene870
		GB44821					gene3744					gene3831			gene8706
		GB44824					gene3750					gene3832			gene8723
		GB44828					gene3751					gene384			gene8731
		GB44829					gene3752					gene3841			gene8746
		GB44830					gene3757					gene3842			gene8748
		GB44832					gene3758					gene3843			gene8753
		GB44836					gene3759					gene3844			gene8757
		GB44841					gene376					gene3845			gene8758
		GB44842					gene3761					gene3847			gene8761
		GB44848					gene3762					gene3848			gene8771
		GB44850					gene3763					gene385			gene8772
		GB44862					gene3765					gene3850			gene8775
		GB44863					gene3766					gene3852			gene8782
		GB44865					gene3767					gene3853			gene8784
		GB44868					gene3769					gene3854			gene8790
		GB44869					gene3770					gene3855			gene8795
		GB44871					gene3771					gene3856			gene8803
		GB44873					gene3772					gene3858			gene8813
		GB44876					gene3774					gene3859			gene8814
		GB44878					gene3775					gene3861			gene8816
		GB44879					gene3778					gene3862			gene8827
		GB44880					gene3779					gene3863			gene8829
		GB44881					gene3781					gene3864			gene8835
		GB44882					gene3785					gene3867			gene8839
		GB44883					gene3788					gene3872			gene8845
		GB44884					gene3793					gene3876			gene8848
		GB44885					gene3795					gene388			gene8852
		GB44886					gene3796					gene3883			gene8853
		GB44888					gene3797					gene3886			gene8854
		GB44889					gene3798					gene3887			gene8858
		GB44890					gene3799					gene389			gene8862
		GB44891					gene3800					gene3893			gene8864
		GB44894					gene3801					gene3897			gene887
		GB44895					gene3802					gene3898			gene8872
		GB44896					gene3803					gene3899			gene8873
		GB44897					gene3804					gene3902			gene8884
		GB44898					gene3806					gene3903			gene8888
		GB44899					gene3807					gene3907			gene8891
		GB44900					gene381					gene391			gene8897
		GB44901					gene3810					gene3910			gene8900
		GB44902					gene3814					gene3911			gene8906
		GB44904					gene3819					gene3913			gene891
		GB44905					gene382					gene3916			gene8913
		GB44906					gene3820					gene3919			gene8920
		GB44907					gene3822					gene3923			gene8922
		GB44909					gene3825					gene3924			gene8926
[truncated: 4,509 more rows]

## Sheet: Amel_2
Amel_2		Whitfield et al. All_tested	Whitfield NvsF	Whitfield N>F	Whitfield F>N	Converted:	Whitfield et al. All_tested	Whitfield NvsF	Whitfield N>F	Whitfield F>N		Shared Universe		IN	FvsL	F>L	L>F	Whitfield NvsF	Whitfield N>F	Whitfield F>N	Overlaps:	FvsL NvF	F>L N>F	F>L F>N	L>F N>F	L>F F>N
OVERLAP FvsL NvF		GB40007	GB40022	GB40022	GB42295		gene0	gene10057	gene10057	gene10032		gene0		SHARED	gene10014	gene10014	gene10025	gene10032	gene10057	gene10032		gene10032	gene10114	gene10032	gene10225	gene1136
Set1: 1074		GB40010	GB40608	GB40608	GB44439		gene100	gene10078	gene10078	gene10109		gene100		UNIVERSE	gene10025	gene10026	gene10120	gene10057	gene10114	gene10109		gene10109	gene10244	gene10109	gene10515	gene11401
Set2: 442		GB40012	GB45968	GB45968	GB44340		gene10005	gene10113	gene10113	gene10184		gene10005			gene10026	gene10032	gene10194	gene10109	gene10225	gene10184		gene10114	gene10247	gene10184	gene10958	gene11555
Overlap: 252		GB40013	GB52324	GB52324	GB53365		gene10014	gene10114	gene10114	gene10232		gene10014			gene10032	gene10053	gene10224	gene10114	gene10235	gene10232		gene10184	gene10407	gene10232	gene11052	gene11583
Total number of genes: 3103		GB40022	GB40164	GB40164	GB49418		gene10014	gene10225	gene10225	gene10234		gene10014			gene10053	gene101	gene10225	gene10184	gene10244	gene10234		gene10225	gene10770	gene10262	gene11086	gene15
		GB40027	GB43208	GB43208	GB46339		gene10018	gene10235	gene10235	gene10262		gene10018			gene101	gene10109	gene10263	gene10225	gene10247	gene10262		gene10232	gene10934	gene1035	gene11098	gene1585
Representation factor: 1.6		GB40028	GB55375	GB55375	GB48932		gene10023	gene10240	gene10240	gene1035		gene10025			gene10109	gene10114	gene10328	gene10232	gene10271	gene1035		gene10244	gene11213	gene10427	gene11116	gene1827
p < 1.044e-25		GB40029	GB51764	GB51764	GB50174		gene10025	gene10244	gene10244	gene10427		gene10026			gene10114	gene10159	gene10333	gene10234	gene10342	gene10427		gene10247	gene11297	gene10900	gene1123	gene1896
		GB40033	GB52656	GB52656	GB42940		gene10026	gene10247	gene10247	gene1047		gene10032			gene10120	gene10184	gene10358	gene10235	gene10367	gene1047		gene10262	gene11338	gene11146	gene11420	gene2007
		GB40057	GB47565	GB47565	GB50965		gene10032	gene10271	gene10271	gene10730		gene10036			gene10159	gene10227	gene1036	gene10244	gene10407	gene10730		gene1035	gene11381	gene1379	gene1157	gene2774
OVERLAP F>L N>F		GB40057	GB53114	GB53114	GB47278		gene10036	gene10289	gene10289	gene10745		gene10040			gene10184	gene10232	gene10386	gene10247	gene10453	gene10745		gene10407	gene11610	gene1631	gene11588	gene328
Set1: 564		GB40063	GB51220	GB51220	GB49585		gene10040	gene10342	gene10342	gene10782		gene10040			gene10194	gene10239	gene10391	gene10262	gene10515	gene10810		gene10427	gene11628	gene1684	gene11649	gene3681
Set2: 285		GB40073	GB54918	GB54918	GB44020		gene10040	gene10367	gene10367	gene10810		gene10040			gene10224	gene10244	gene10441	gene10271	gene10770	gene10900		gene10515	gene11755	gene1858	gene11682	gene4180
Overlap: 70		GB40073	GB41946	GB41946	GB54798		gene10040	gene10407	gene10407	gene10900		gene10053			gene10225	gene10247	gene10447	gene10342	gene10934	gene10973		gene10770	gene11789	gene1887	gene11689	gene4212
Total number of genes: 3103		GB40074	GB53768	GB53768	GB48248		gene10053	gene10453	gene10453	gene10973		gene10057			gene10227	gene1026	gene10452	gene1035	gene10958	gene11146		gene10900	gene11821	gene1914	gene11850	gene426
		GB40076	GB53672	GB53672	GB54143		gene10057	gene10515	gene10515	gene11146		gene10057			gene10232	gene10262	gene10479	gene10367	gene11029	gene11157		gene10934	gene11893	gene2144	gene11952	gene507
Representation factor: 1.4		GB40077	GB55082	GB55082	GB50699		gene10057	gene10523	gene10523	gene11157		gene1007			gene10239	gene1028	gene10483	gene10407	gene11052	gene1136		gene10958	gene12059	gene2387	gene1203	gene5173
p < 0.003		GB40083	GB44721	GB44721	GB43848		gene1007	gene10770	gene10770	gene1136		gene101			gene10244	gene10291	gene10510	gene10427	gene11086	gene11401		gene11052	gene1211	gene2693	gene12055	gene542
		GB40089	GB50156	GB50156	GB46071		gene101	gene10786	gene10786	gene11366		gene10103			gene10247	gene10296	gene10512	gene10453	gene11098	gene11555		gene11086	gene12208	gene3527	gene12062	gene5511
		GB40089	GB52505	GB52505	GB55501		gene10103	gene10896	gene10896	gene11386		gene10103			gene1026	gene103	gene10515	gene1047	gene11099	gene11583		gene11098	gene127	gene3562	gene12157	gene5807
OVERLAP F>L F>N		GB40089	GB45688	GB45688	GB55789		gene10103	gene10934	gene10934	gene11401		gene10109			gene10262	gene10311	gene1053	gene10515	gene11116	gene11592		gene11116	gene1367	gene3930	gene1395	gene6087
Set1: 564		GB40092	GB47183	GB47183	GB48973		gene10109	gene10958	gene10958	gene11443		gene10109			gene10263	gene10318	gene10596	gene10730	gene11213	gene11641		gene11146	gene1594	gene4131	gene1407	gene6097
Set2: 157		GB40092	GB50447	GB50447	GB46479		gene10109	gene11017	gene11017	gene11555		gene10114			gene1028	gene10332	gene1064	gene10745	gene1123	gene11801		gene11213	gene1799	gene4189	gene1563	gene7086
Overlap: 55		GB40092	GB45399	GB45399	GB50381		gene10114	gene11022	gene11022	gene11583		gene10120			gene10291	gene10335	gene1068	gene10770	gene11297	gene1197		gene1123	gene2158	gene4373	gene1586	gene7696
Total number of genes: 3103		GB40098	GB55220	GB55220	GB42143		gene10120	gene11029	gene11029	gene11592		gene10126			gene10296	gene1035	gene10689	gene10810	gene11324	gene11985		gene11297	gene2277	gene463	gene1703	gene786
		GB40106	GB42809	GB42809	GB49519		gene10126	gene11052	gene11052	gene11641		gene10126			gene103	gene10407	gene10706	gene10900	gene11338	gene12016		gene11338	gene2352	gene4677	gene1724	gene800
Representation factor: 1.9		GB40108	GB53625	GB53625	GB43293		gene10126	gene11086	gene11086	gene11725		gene10145			gene10311	gene10425	gene10768	gene10934	gene11381	gene1213		gene1136	gene2391	gene4879	gene180	gene8328
p < 1.740e-07		GB40108	GB48022	GB48022	GB55514		gene10145	gene11098	gene11098	gene11801		gene10154			gene10318	gene10427	gene10806	gene10958	gene11420	gene12173		gene11381	gene2392	gene5262	gene2096	gene8900
		GB40109	GB50936	GB50936	GB43697		gene10154	gene11099	gene11099	gene1197		gene10158			gene10328	gene10449	gene10808	gene10973	gene1157	gene1354		gene11401	gene2448	gene5704	gene2132	gene9031
		GB40113	GB49970	GB49970	GB47030		gene10158	gene11116	gene11116	gene11985		gene10159			gene10332	gene10470	gene10858	gene11029	gene11588	gene1379		gene11420	gene2897	gene5716	gene2135	gene9177
OVERLAP L>F N>F		GB40113	GB52829	GB52829	GB53417		gene10159	gene11197	gene11197	gene12016		gene10159			gene10333	gene10472	gene10888	gene11052	gene11610	gene15		gene11555	gene2922	gene5857	gene2211	gene9255
Set1: 510		GB40118	GB45971	GB45971	GB50849		gene10159	gene11213	gene11213	gene1213		gene10160			gene10335	gene10511	gene10957	gene11086	gene11628	gene1585		gene1157	gene3058	gene5963	gene2466	gene9659
Set2: 285		GB40118	GB54756	GB54756	GB55073		gene10160	gene1123	gene1123	gene12173		gene10176			gene1035	gene10544	gene10958	gene11098	gene11649	gene1631		gene11583	gene3068	gene6162	gene2705
Overlap: 95		GB40119	GB47104	GB47104	GB48236		gene10176	gene11297	gene11297	gene12178		gene10176			gene10358	gene10545	gene10959	gene11099	gene11650	gene1684		gene11588	gene3343	gene6173	gene2723
Total number of genes: 3103		GB40129	GB40779	GB40779	GB40794		gene10176	gene11324	gene11324	gene1354		gene10176			gene1036	gene10561	gene10984	gene11116	gene11682	gene1827		gene11610	gene347	gene6385	gene2781
		GB40134	GB52017	GB52017	GB50941		gene10176	gene11338	gene11338	gene1379		gene10184			gene10386	gene10562	gene10993	gene11146	gene11689	gene1830		gene11628	gene3524	gene6698	gene2898
Representation factor: 2.0		GB40134	GB46448	GB46448	GB40441		gene10184	gene11381	gene11381	gene15		gene10184			gene10391	gene10613	gene11012	gene11157	gene11755	gene1858		gene11649	gene3765	gene6757	gene2933
p < 1.116e-13		GB40134	GB42944	GB42944	GB44078		gene10184	gene11420	gene11420	gene1585		gene10194			gene10407	gene10619	gene11032	gene11213	gene11756	gene186		gene11682	gene3897	gene6792	gene2989
		GB40134	GB42422	GB42422	GB43948		gene10194	gene1157	gene1157	gene1631		gene10205			gene10425	gene10649	gene11046	gene1123	gene11789	gene1887		gene11689	gene3950	gene7085	gene3115
		GB40134	GB42835	GB42835	GB54313		gene10205	gene11580	gene11580	gene1684		gene10211			gene10427	gene10661	gene11052	gene11297	gene11821	gene1896		gene11755	gene4260	gene7280	gene3179
OVERLAP L>F F>N		GB40134	GB52634	GB52634	GB40944		gene10211	gene11588	gene11588	gene1819		gene10224			gene10441	gene10694	gene11080	gene11324	gene11850	gene1914		gene11789	gene4277	gene7443	gene3218
Set1: 510		GB40134	GB44893	GB44893	GB45526		gene10224	gene11610	gene11610	gene1827		gene10225			gene10447	gene10699	gene11086	gene11338	gene11889	gene1998		gene11821	gene4485	gene7752	gene3345
Set2: 157		GB40134	GB44412	GB44412	GB47841		gene10225	gene11628	gene11628	gene1830		gene10225			gene10449	gene1070	gene11098	gene1136	gene11893	gene1999		gene11850	gene4641	gene8010	gene3685
Overlap: 32		GB40145	GB44073	GB44073	GB45324		gene10225	gene11642	gene11642	gene1858		gene10227			gene10452	gene10702	gene11105	gene11381	gene11900	gene2007		gene11893	gene4686	gene8359	gene3814
Total number of genes: 3103		GB40150	GB48105	GB48105	GB53506		gene10227	gene11649	gene11649	gene186		gene10232			gene10470	gene10724	gene11106	gene11401	gene11952	gene2144		gene11952	gene5694	gene8393	gene3898
		GB40150	GB48193	GB48193	GB50691		gene10232	gene11650	gene11650	gene1887		gene10232			gene10472	gene10746	gene11116	gene11420	gene11958	gene2284		gene1203	gene5907	gene8429	gene4070
Representation factor: 1.2		GB40150	GB52438	GB52438	GB51699		gene10232	gene11682	gene11682	gene1896		gene10234			gene10479	gene10767	gene11131	gene11555	gene1203	gene2387		gene12055	gene6099	gene8888	gene4122
p < 0.106		GB40150	GB48234	GB48234	GB42761		gene10234	gene11689	gene11689	gene1914		gene10235			gene10483	gene10770	gene11205	gene1157	gene12055	gene2388		gene12059	gene6176	gene8933	gene4206
		GB40150	GB43091	GB43091	GB43276		gene10235	gene11715	gene11715	gene1998		gene10235			gene10510	gene10775	gene11206	gene11583	gene12059	gene2693		gene12062	gene6261	gene9072	gene434
		GB40150	GB44146	GB44146	GB41154		gene10235	gene11719	gene11719	gene1999		gene10239			gene10511	gene10781	gene1123	gene11588	gene12062	gene2774		gene1211	gene6265	gene9114	gene4416
		GB40150	GB55669	GB55669	GB43567		gene10239	gene11753	gene11753	gene2007		gene10239			gene10512	gene10804	gene11245	gene11592	gene1211	gene3057		gene12157	gene6366	gene9204	gene442
		GB40151	GB51736	GB51736	GB44530		gene10239	gene11755	gene11755	gene2144		gene10239			gene10515	gene10814	gene1126	gene11610	gene12157	gene328		gene12208	gene642	gene9325	gene4430
		GB40157	GB47248	GB47248	GB54256		gene10239	gene11756	gene11756	gene2284		gene10239			gene1053	gene10826	gene11263	gene11628	gene12208	gene3339		gene127	gene6588	gene964	gene4517
		GB40159	GB51712	GB51712	GB52659		gene10239	gene11789	gene11789	gene2325		gene10239			gene10544	gene10828	gene11265	gene11641	gene12251	gene3443		gene1367	gene663	gene9736	gene4615
		GB40159	GB43302	GB43302	GB41521		gene10239	gene11821	gene11821	gene2387		gene10244			gene10545	gene10879	gene11272	gene11649	gene12270	gene3527		gene1379	gene6995	gene9800	gene490
		GB40169	GB50158	GB50158	GB49083		gene10244	gene11850	gene11850	gene2388		gene10244			gene10561	gene10900	gene1132	gene11650	gene12315	gene3562		gene1395	gene7198		gene5287
		GB40169	GB51261	GB51261	GB52779		gene10244	gene11889	gene11889	gene2615		gene10247			gene10562	gene10905	gene11330	gene11682	gene127	gene3681		gene1407	gene7473		gene5343
		GB40208	GB55707	GB55707	GB50837		gene10247	gene11893	gene11893	gene2660		gene10247			gene10596	gene10906	gene11341	gene11689	gene1356	gene3722		gene15	gene7759		gene5720
		GB40217	GB50970	GB50970	GB50690		gene10247	gene11900	gene11900	gene2693		gene10247			gene10613	gene1091	gene11350	gene11755	gene1367	gene3732		gene1563	gene7883		gene5726
		GB40226	GB55162	GB55162	GB55650		gene10247	gene11952	gene11952	gene2774		gene10249			gene10619	gene10934	gene11358	gene11756	gene138	gene3810		gene1585	gene8234		gene5868
		GB40232	GB53830	GB53830	GB53145		gene10249	gene11958	gene11958	gene2856		gene1026			gene1064	gene10935	gene1136	gene11789	gene1395	gene3930		gene1586	gene8286		gene5957
		GB40237	GB53582	GB53582	GB43301		gene1026	gene12023	gene12023	gene2927		gene10262			gene10649	gene10940	gene11401	gene11801	gene1407	gene3951		gene1594	gene8697		gene6012
		GB40238	GB52979	GB52979	GB52741		gene10262	gene1203	gene1203	gene3057		gene10262			gene10661	gene10956	gene11420	gene11821	gene1417	gene4131		gene1631	gene898		gene6411
		GB40240	GB53811	GB53811	GB41423		gene10262	gene12055	gene12055	gene3186		gene10262			gene1068	gene10960	gene11461	gene11850	gene1503	gene4180		gene1684	gene9016		gene6585
		GB40259	GB50891	GB50891	GB44281		gene10262	gene12059	gene12059	gene319		gene10263			gene10689	gene10980	gene11462	gene11889	gene1545	gene4189		gene1703	gene9294		gene6599
		GB40267	GB51710	GB51710	GB43937		gene10263	gene12062	gene12062	gene328		gene10263			gene10694	gene11002	gene11472	gene11893	gene1563	gene4212		gene1724	gene9460		gene6857
		GB40278	GB51249	GB51249	GB48034		gene10263	gene1211	gene1211	gene3339		gene10271			gene10699	gene11014	gene11555	gene11900	gene1586	gene4249		gene1799	gene9523		gene6929
		GB40278	GB45724	GB45724	GB40670		gene10271	gene12157	gene12157	gene3443		gene10271			gene1070	gene1103	gene1157	gene11952	gene1594	gene426		gene180	gene9694		gene7009
		GB40278	GB49259	GB49259	GB50806		gene10271	gene12208	gene12208	gene3479		gene10271			gene10702	gene1104	gene11574	gene11958	gene1703	gene4373		gene1827	gene9985		gene7116
		GB40282	GB40770	GB40770	GB55262		gene10271	gene12251	gene12251	gene3527		gene10271			gene10706	gene11044	gene11583	gene1197	gene1724	gene4447		gene1858	gene9992		gene7235
		GB40283	GB50765	GB50765	GB42894		gene10271	gene12266	gene12266	gene3562		gene1028			gene10724	gene1105	gene11588	gene11985	gene1729	gene4512		gene1887			gene7262
		GB40289	GB40460	GB40460	GB40730		gene1028	gene12270	gene12270	gene3681		gene10283			gene10746	gene11091	gene11648	gene12016	gene1799	gene4515		gene1896			gene7272
		GB40299	GB46713	GB46713	GB43949		gene10283	gene12315	gene12315	gene370		gene10291			gene10767	gene11119	gene11649	gene1203	gene180	gene463		gene1914			gene7404
		GB40301	GB45382	GB45382	GB45055		gene10291	gene127	gene127	gene3722		gene10291			gene10768	gene11129	gene11654	gene12055	gene2017	gene4652		gene2007			gene7661
		GB40302	GB41223	GB41223	GB41671		gene10291	gene1356	gene1356	gene3732		gene10293			gene10770	gene11130	gene11682	gene12059	gene2096	gene4677		gene2096			gene7681
		GB40303	GB50885	GB50885	GB42780		gene10293	gene1367	gene1367	gene3800		gene10296			gene10775	gene11132	gene11689	gene12062	gene2132	gene4683		gene2132			gene7682
		GB40308	GB44058	GB44058	GB41773		gene10296	gene138	gene138	gene3810		gene10296			gene10781	gene11136	gene11696	gene1211	gene2135	gene4823		gene2135			gene7709
		GB40310	GB55226	GB55226	GB44976		gene10296	gene1395	gene1395	gene3844		gene10296			gene10804	gene11146	gene11717	gene1213	gene2158	gene4879		gene2144			gene784
		GB40312	GB55356	GB55356	GB42579		gene10296	gene1407	gene1407	gene3868		gene103			gene10806	gene11153	gene11743	gene12157	gene2169	gene4961		gene2158			gene8071
		GB40320	GB49598	GB49598	GB43160		gene103	gene1417	gene1417	gene3901		gene103			gene10808	gene11158	gene11744	gene12173	gene2196	gene507		gene2211			gene8095
		GB40343	GB47477	GB47477	GB48684		gene103	gene1427	gene1427	gene3930		gene10305			gene10814	gene11183	gene11747	gene12208	gene2211	gene5151		gene2277			gene8184
		GB40343	GB54020	GB54020	GB40865		gene10305	gene1503	gene1503	gene3951		gene10305			gene10826	gene11200	gene11793	gene12251	gene2269	gene5173		gene2352			gene822
		GB40348	GB50633	GB50633	GB41808		gene10305	gene1545	gene1545	gene4131		gene10311			gene10828	gene11213	gene11804	gene12270	gene2275	gene5262		gene2387			gene8302
		GB40348	GB47312	GB47312	GB46853		gene10311	gene1563	gene1563	gene4180		gene10315			gene10858	gene11218	gene11850	gene12315	gene2276	gene5265		gene2391			gene8577
		GB40348	GB47313	GB47313	GB48059		gene10315	gene1586	gene1586	gene4189		gene10318			gene10879	gene11246	gene11887	gene127	gene2277	gene5345		gene2392			gene8678
		GB40356	GB53086	GB53086	GB49332		gene10318	gene1594	gene1594	gene4212		gene10318			gene10888	gene1125	gene11888	gene1354	gene2352	gene5351		gene2448			gene8685
		GB40358	GB45167	GB45167	GB50878		gene10318	gene1703	gene1703	gene4249		gene10318			gene10900	gene11267	gene11897	gene1356	gene2391	gene542		gene2466			gene8954
		GB40360	GB48772	GB48772	GB46599		gene10318	gene1724	gene1724	gene426		gene10318			gene10905	gene11270	gene11910	gene1367	gene2392	gene5489		gene2693			gene8968
		GB40377	GB40119	GB40119	GB50942		gene10318	gene1729	gene1729	gene4373		gene10318			gene10906	gene11288	gene11915	gene1379	gene2448	gene5511		gene2705			gene9049
		GB40377	GB55288	GB55288	GB48199		gene10318	gene1799	gene1799	gene4447		gene10318			gene1091	gene11293	gene11939	gene138	gene2453	gene5704		gene2723			gene913
		GB40385	GB50866	GB50866	GB48446		gene10318	gene180	gene180	gene4512		gene10318			gene10934	gene11297	gene11952	gene1395	gene2466	gene5716		gene2774			gene9364
		GB40387	GB44311	GB44311	GB45811		gene10318	gene1834	gene1834	gene4515		gene10328			gene10935	gene11313	gene11982	gene1407	gene2627	gene5807		gene2781			gene940
		GB40405	GB41630	GB41630	GB55146		gene10328	gene2017	gene2017	gene4589		gene10328			gene10940	gene11317	gene11994	gene1417	gene2631	gene5857		gene2897			gene943
		GB40405	GB41545	GB41545	GB45911		gene10328	gene2069	gene2069	gene463		gene10332			gene10956	gene11318	gene1200	gene15	gene2648	gene5936		gene2898			gene9541
		GB40405	GB55547	GB55547	GB46655		gene10332	gene2096	gene2096	gene4652		gene10333			gene10957	gene11333	gene12005	gene1503	gene2705	gene5958		gene2922			gene992
		GB40412	GB46736	GB46736	GB43956		gene10333	gene2132	gene2132	gene4677		gene10335			gene10958	gene11336	gene1203	gene1545	gene2723	gene5963		gene2933
		GB40414	GB42984	GB42984	GB44482		gene10335	gene2135	gene2135	gene4683		gene10342			gene10959	gene11338	gene12049	gene1563	gene2728	gene6087		gene2989
		GB40414	GB54996	GB54996	GB55855		gene10342	gene2158	gene2158	gene4823		gene1035			gene10960	gene11344	gene12055	gene1585	gene2781	gene6097		gene3058
		GB40420	GB49642	GB49642	GB42755		gene1035	gene2169	gene2169	gene4879		gene10352			gene10980	gene11353	gene12062	gene1586	gene2883	gene6162		gene3068
		GB40422	GB46768	GB46768	GB51110		gene10352	gene2192	gene2192	gene4961		gene10352			gene10984	gene11367	gene12126	gene1594	gene2891	gene6173		gene3115
		GB40426	GB43717	GB43717	GB43015		gene10352	gene2196	gene2196	gene507		gene10352			gene10993	gene11381	gene12157	gene1631	gene2897	gene6243		gene3179
		GB40427	GB41725	GB41725	GB48215		gene10352	gene2199	gene2199	gene5151		gene10352			gene11002	gene11382	gene12193	gene1684	gene2898	gene6274		gene3218
		GB40434	GB55938	GB55938	GB52340		gene10352	gene2211	gene2211	gene5173		gene10352			gene11012	gene11473	gene12318	gene1703	gene2901	gene6383		gene328
		GB40436	GB50622	GB50622	GB49560		gene10352	gene2263	gene2263	gene5262		gene10352			gene11014	gene11481	gene1250	gene1724	gene2922	gene6385		gene3343
		GB40439	GB43716	GB43716	GB46757		gene10352	gene2269	gene2269	gene5265		gene10352			gene1103	gene11539	gene1261	gene1729	gene2933	gene6698		gene3345
		GB40442	GB44039	GB44039	GB48145		gene10352	gene2275	gene2275	gene5345		gene10352			gene11032	gene11604	gene131	gene1799	gene2989	gene6757		gene347
		GB40444	GB52115	GB52115	GB48019		gene10352	gene2276	gene2276	gene5351		gene10358			gene1104	gene11610	gene1313	gene180	gene3058	gene6792		gene3524
		GB40451	GB40436	GB40436	GB44060		gene10358	gene2277	gene2277	gene542		gene10358			gene11044	gene11613	gene1395	gene1827	gene3062	gene6798		gene3527
		GB40452	GB49757	GB49757	GB53950		gene10358	gene2320	gene2320	gene5489		gene10358			gene11046	gene11628	gene1398	gene1830	gene3068	gene6844		gene3562
		GB40454	GB47815	GB47815	GB53657		gene10358	gene2352	gene2352	gene5511		gene1036			gene1105	gene11660	gene1407	gene1858	gene3077	gene6937		gene3681
		GB40454	GB50626	GB50626	GB46371		gene1036	gene2391	gene2391	gene5704		gene10367			gene11052	gene11695	gene1418	gene186	gene3113	gene6944		gene3685
		GB40456	GB50183	GB50183	GB41011		gene10367	gene2392	gene2392	gene5716		gene10368			gene11080	gene11733	gene1491	gene1887	gene3115	gene6951		gene3765
		GB40460	GB49313	GB49313	GB51683		gene10368	gene2430	gene2430	gene574		gene10368			gene11086	gene11755	gene1492	gene1896	gene3179	gene7022		gene3814
		GB40467	GB53784	GB53784	GB46597		gene10368	gene2448	gene2448	gene5807		gene10377			gene11091	gene11766	gene15	gene1914	gene3201	gene7047		gene3897
		GB40473	GB50011	GB50011	GB50157		gene10377	gene2453	gene2453	gene5857		gene10381			gene11098	gene11789	gene1534	gene1998	gene3217	gene7085		gene3898
		GB40478	GB54507	GB54507	GB51744		gene10381	gene2466	gene2466	gene5936		gene10381			gene11105	gene11821	gene1547	gene1999	gene3218	gene7086		gene3930
		GB40479	GB47635	GB47635	GB47412		gene10381	gene2586	gene2586	gene5958		gene10386			gene11106	gene11826	gene1556	gene2007	gene3226	gene7227		gene3950
		GB40490	GB53565	GB53565	GB43960		gene10386	gene2619	gene2619	gene5963		gene10388			gene11116	gene11839	gene1563	gene2017	gene3343	gene7280		gene4070
		GB40504	GB50239	GB50239	GB48690		gene10388	gene2627	gene2627	gene6087		gene10388			gene11119	gene11852	gene1585	gene2096	gene3345	gene7315		gene4122
		GB40513	GB54294	GB54294	GB46492		gene10388	gene2631	gene2631	gene6097		gene10391			gene11129	gene11857	gene1586	gene2132	gene3377	gene7332		gene4131
		GB40517	GB40857	GB40857	GB51009		gene10391	gene2638	gene2638	gene6154		gene10407			gene11130	gene11892	gene1630	gene2135	gene3452	gene7443		gene4180
		GB40517	GB55537	GB55537	GB52432		gene10407	gene2648	gene2648	gene6162		gene10407			gene11131	gene11893	gene1639	gene2144	gene347	gene7577		gene4189
		GB40519	GB44422	GB44422	GB43504		gene10407	gene2705	gene2705	gene6167		gene10407			gene11132	gene11942	gene1677	gene2158	gene3509	gene7696		gene4206
		GB40519	GB47314	GB47314	GB41287		gene10407	gene2723	gene2723	gene6173		gene10407			gene11136	gene11971	gene1703	gene2169	gene3524	gene7752		gene4212
		GB40541	GB55368	GB55368	GB44490		gene10407	gene2728	gene2728	gene6243		gene10407			gene11146	gene1205	gene171	gene2196	gene3685	gene7853		gene426
		GB40541	GB53071	GB53071	GB51257		gene10407	gene2781	gene2781	gene6274		gene10409			gene11153	gene12057	gene1724	gene2211	gene3762	gene786		gene4260
		GB40554	GB53047	GB53047	GB43379		gene10409	gene2883	gene2883	gene6383		gene10409			gene11158	gene12059	gene1741	gene2269	gene3765	gene7866		gene4277
		GB40556	GB41824	GB41824	GB52524		gene10409	gene2891	gene2891	gene6385		gene10411			gene11183	gene12063	gene1770	gene2275	gene3795	gene7889		gene434
		GB40563	GB41262	GB41262	GB47142		gene10411	gene2897	gene2897	gene6394		gene10420			gene11200	gene1211	gene180	gene2276	gene3807	gene800		gene4373
		GB40565	GB48603	GB48603	GB53043		gene10420	gene2898	gene2898	gene6494		gene10420			gene11205	gene12161	gene1827	gene2277	gene3814	gene8010		gene4416
		GB40565	GB42260	GB42260	GB41156		gene10420	gene2901	gene2901	gene6698		gene10425			gene11206	gene12208	gene1846	gene2284	gene3825	gene8281		gene442
		GB40565	GB55600	GB55600	GB50160		gene10425	gene2922	gene2922	gene6757		gene10427			gene11213	gene12210	gene1896	gene2352	gene3864	gene8289		gene4430
		GB40576	GB54985	GB54985	GB42326		gene10427	gene2933	gene2933	gene6792		gene10432			gene11218	gene1224	gene196	gene2387	gene3897	gene8328		gene4485
		GB40592	GB50908	GB50908	GB47413		gene10432	gene2989	gene2989	gene6798		gene10440			gene1123	gene12248	gene2	gene2388	gene3898	gene8359		gene4517
		GB40594	GB42544	GB42544	GB43036		gene10440	gene3058	gene3058	gene6844		gene10440			gene11245	gene1236	gene2007	gene2391	gene3899	gene8393		gene4615
		GB40596	GB46425	GB46425	GB45260		gene10440	gene3062	gene3062	gene6937		gene10441			gene11246	gene127	gene2015	gene2392	gene3903	gene8429		gene463
		GB40598	GB54237	GB54237	GB45263		gene10441	gene3068	gene3068	gene6944		gene10447			gene1125	gene1282	gene2096	gene2448	gene3941	gene8455		gene4641
		GB40598	GB54932	GB54932	GB50257		gene10447	gene3077	gene3077	gene6951		gene10447			gene1126	gene1308	gene210	gene2453	gene3950	gene8559		gene4677
		GB40603	GB44860	GB44860	GB51100		gene10447	gene3113	gene3113	gene6981		gene10447			gene11263	gene1317	gene2131	gene2466	gene3991	gene8888		gene4686
		GB40619	GB45850	GB45850	GB48852		gene10447	gene3115	gene3115	gene7022		gene10449			gene11265	gene1364	gene2132	gene2627	gene4040	gene8900		gene4879
		GB40626	GB44533	GB44533	GB55438		gene10449	gene3179	gene3179	gene7047		gene1045			gene11267	gene1367	gene2135	gene2631	gene4059	gene8933		gene490
		GB40626	GB42688	GB42688	GB43245		gene1045	gene3201	gene3201	gene7085		gene10452			gene11270	gene1379	gene2137	gene2648	gene4070	gene9031		gene507
		GB40626	GB40278	GB40278	GB49705		gene10452	gene3217	gene3217	gene7086		gene10453			gene11272	gene1408	gene2160	gene2693	gene4121	gene9072		gene5173
		GB40626	GB44886	GB44886	GB49487		gene10453	gene3218	gene3218	gene7227		gene10468			gene11288	gene1425	gene2174	gene2705	gene4122	gene9114		gene5262
		GB40626	GB51158	GB51158	GB53318		gene10468	gene3226	gene3226	gene7280		gene1047			gene11293	gene1442	gene2175	gene2723	gene4192	gene9177		gene5287
		GB40626	GB47604	GB47604	GB54315		gene1047	gene3343	gene3343	gene7315		gene1047			gene11297	gene1458	gene2187	gene2728	gene4206	gene9204		gene5343
		GB40626	GB49794	GB49794	GB54818		gene1047	gene3345	gene3345	gene7332		gene1047			gene11313	gene1464	gene2193	gene2774	gene4241	gene922		gene542
		GB40626	GB43459	GB43459	GB44936		gene1047	gene3377	gene3377	gene7363		gene10470			gene11317	gene151	gene2211	gene2781	gene4260	gene9255		gene5511
		GB40626	GB42141	GB42141	GB42241		gene10470	gene3452	gene3452	gene7443		gene10470			gene11318	gene1555	gene2226	gene2883	gene4277	gene9325		gene5694
		GB40626	GB52997	GB52997	GB50909		gene10470	gene3458	gene3458	gene7577		gene10472			gene1132	gene1593	gene2237	gene2891	gene430	gene9395		gene5704
		GB40626	GB42871	GB42871	GB55698		gene10472	gene3461	gene3461	gene7696		gene10479			gene11330	gene1594	gene2251	gene2897	gene434	gene9399		gene5716
		GB40629	GB48241	GB48241	GB53394		gene10479	gene3464	gene3464	gene7752		gene10479			gene11333	gene1631	gene2258	gene2898	gene436	gene9537		gene5720
		GB40648	GB41629	GB41629	GB45052		gene10479	gene347	gene347	gene7853		gene1048			gene11336	gene165	gene227	gene2901	gene4395	gene964		gene5726
		GB40648	GB53310	GB53310	GB41608		gene1048	gene3509	gene3509	gene786		gene10483			gene11338	gene1684	gene2318	gene2922	gene4416	gene9659		gene5807
		GB40648	GB55388	GB55388	GB40523		gene10483	gene3513	gene3513	gene7866		gene10510			gene11341	gene1712	gene2333	gene2933	gene442	gene9736		gene5857
		GB40652	GB50939	GB50939	GB48941		gene10510	gene3524	gene3524	gene7889		gene10511			gene11344	gene173	gene2346	gene2989	gene4430	gene9800		gene5868
		GB40653	GB51198	GB51198	GB41075		gene10511	gene3685	gene3685	gene7995		gene10512			gene11350	gene1785	gene2348	gene3057	gene4485	gene987		gene5907
		GB40653	GB55574	GB55574	GB46013		gene10512	gene3688	gene3688	gene800		gene10515			gene11353	gene1799	gene2384	gene3058	gene4517			gene5957
		GB40656	GB41146	GB41146	GB51659		gene10515	gene3693	gene3693	gene8010		gene10515			gene11358	gene1800	gene2389	gene3062	gene4587			gene5963
		GB40656	GB55575	GB55575	GB47628		gene10515	gene373	gene373	gene8248		gene10515			gene1136	gene1858	gene2466	gene3068	gene4603			gene6012
		GB40670	GB44978	GB44978	GB46569		gene10515	gene3762	gene3762	gene8281		gene1053			gene11367	gene1887	gene2499	gene3077	gene4615			gene6087
		GB40670	GB49148	GB49148	GB48962		gene1053	gene3765	gene3765	gene8289		gene10544			gene11381	gene1905	gene2611	gene3113	gene4619			gene6097
		GB40670	GB43938	GB43938	GB54876		gene10544	gene3795	gene3795	gene8328		gene10545			gene11382	gene1914	gene2622	gene3115	gene4641			gene6099
		GB40673	GB41756	GB41756	GB49463		gene10545	gene3807	gene3807	gene8359		gene10559			gene11401	gene195	gene2677	gene3179	gene4686			gene6162
		GB40678	GB43963	GB43963	GB44336		gene10559	gene3814	gene3814	gene8393		gene10560			gene11420	gene1995	gene27	gene3201	gene4847			gene6173
		GB40694	GB53046	GB53046	GB46918		gene10560	gene3825	gene3825	gene8429		gene10560			gene11461	gene2061	gene2705	gene3217	gene4849			gene6176
		GB40694	GB53013	GB53013	GB40565		gene10560	gene3864	gene3864	gene8455		gene10560			gene11462	gene2086	gene2723	gene3218	gene490			gene6261
		GB40700	GB43128	GB43128	GB49467		gene10560	gene3897	gene3897	gene8472		gene10561			gene11472	gene2111	gene2746	gene3226	gene5013			gene6265
		GB40700	GB49535	GB49535	GB40765		gene10561	gene3898	gene3898	gene8557		gene10562			gene11473	gene2144	gene2774	gene328	gene5061			gene6366
		GB40703	GB50013	GB50013	GB44334		gene10562	gene3899	gene3899	gene8559		gene10567			gene11481	gene2147	gene2778	gene3339	gene5119			gene6385
		GB40703	GB44835	GB44835	GB41994		gene10567	gene3903	gene3903	gene8605		gene10596			gene11539	gene2158	gene2781	gene3343	gene5202			gene6411
		GB40705	GB42960	GB42960	GB44148		gene10596	gene3941	gene3941	gene8636		gene10599			gene11555	gene2162	gene2798	gene3345	gene5287			gene642
		GB40708	GB42846	GB42846	GB45199		gene10599	gene3950	gene3950	gene8711		gene10613			gene1157	gene2208	gene283	gene3377	gene5343			gene6585
		GB40711	GB55828	GB55828	GB53989		gene10613	gene3991	gene3991	gene8728		gene10619			gene11574	gene2215	gene2845	gene3443	gene5439			gene6588
		GB40713	GB54938	GB54938	GB49443		gene10619	gene4040	gene4040	gene8830		gene1064			gene11583	gene2255	gene2898	gene3452	gene5617			gene6599
		GB40718	GB52679	GB52679	GB42728		gene1064	gene4059	gene4059	gene8888		gene10649			gene11588	gene2271	gene2933	gene347	gene568			gene663
		GB40735	GB43980	GB43980	GB46330		gene10649	gene4070	gene4070	gene8900		gene10654			gene11604	gene2274	gene2935	gene3509	gene5694			gene6698
		GB40735	GB45501	GB45501	GB50397		gene10654	gene4121	gene4121	gene8933		gene10661			gene11610	gene2277	gene2989	gene3524	gene5720			gene6757
		GB40735	GB42455	GB42455	GB49672		gene10661	gene4122	gene4122	gene9031		gene10661			gene11613	gene2283	gene3	gene3527	gene5726			gene6792
		GB40741	GB42172	GB42172	GB48790		gene10661	gene4192	gene4192	gene907		gene10661			gene11628	gene2322	gene3027	gene3562	gene5782			gene6857
		GB40746	GB47625	GB47625	GB55247		gene10661	gene4194	gene4194	gene9072		gene1068			gene11648	gene2352	gene3041	gene3681	gene5868			gene6929
		GB40747	GB55757	GB55757	GB51848		gene1068	gene4206	gene4206	gene9114		gene10689			gene11649	gene2360	gene3094	gene3685	gene5871			gene6995
		GB40750	GB55396	GB55396	GB47614		gene10689	gene4241	gene4241	gene9177		gene10694			gene11654	gene2365	gene31	gene3722	gene5907			gene7009
		GB40750	GB47879	GB47879	GB52778		gene10694	gene4260	gene4260	gene9204		gene10699			gene11660	gene2376	gene3104	gene3732	gene5957			gene7085
		GB40751	GB49706	GB49706	GB52281		gene10699	gene4277	gene4277	gene922		gene1070			gene11682	gene2383	gene3115	gene3762	gene6012			gene7086
		GB40759	GB50190	GB50190	GB42000		gene1070	gene430	gene430	gene9255		gene10702			gene11689	gene2386	gene3131	gene3765	gene6066			gene7116
		GB40760	GB49594	GB49594	GB50890		gene10702	gene434	gene434	gene9325		gene10706			gene11695	gene2387	gene3156	gene3795	gene6099			gene7198
		GB40765	GB43446	GB43446	GB55986		gene10706	gene4346	gene4346	gene9395		gene10712			gene11696	gene2391	gene3179	gene3807	gene613			gene7235
		GB40766	GB51335	GB51335	GB41408		gene10712	gene436	gene436	gene9399		gene10724			gene11717	gene2392	gene3218	gene3810	gene6176			gene7262
		GB40769	GB41289	GB41289	GB49688		gene10724	gene4366	gene4366	gene9537		gene10724			gene11733	gene2403	gene3240	gene3814	gene618			gene7272
		GB40770	GB53287	GB53287	GB42043		gene10724	gene4395	gene4395	gene964		gene10724			gene11743	gene2427	gene3253	gene3825	gene6191			gene7280
		GB40773	GB49529	GB49529	GB49233		gene10724	gene4416	gene4416	gene9659		gene10730			gene11744	gene2428	gene327	gene3864	gene6261			gene7404
		GB40785	GB53384	GB53384	GB52212		gene10730	gene442	gene442	gene9736		gene10730			gene11747	gene2429	gene328	gene3897	gene6265			gene7443
		GB40794	GB50694	GB50694	GB40054		gene10730	gene4430	gene4430	gene9800		gene10740			gene11755	gene243	gene3280	gene3898	gene6267			gene7473
		GB40794	GB55224	GB55224	GB43572		gene10740	gene4485	gene4485	gene9856		gene10745			gene11766	gene2433	gene3299	gene3899	gene6366			gene7661
		GB40794	GB44485	GB44485	GB43195		gene10745	gene450	gene450	gene987		gene10746			gene11789	gene2443	gene3345	gene3903	gene6411			gene7681
		GB40794	GB54331	GB54331	GB55730		gene10746	gene4517	gene4517	gene993		gene1075			gene11793	gene2448	gene3429	gene3930	gene642			gene7682
		GB40796	GB41430	GB41430	GB44093		gene1075	gene4587	gene4587			gene10767			gene11804	gene2523	gene3439	gene3941	gene6431			gene7696
		GB40802	GB45286	GB45286	GB52427		gene10767	gene4590	gene4590			gene10768			gene11821	gene2552	gene3508	gene3950	gene6485			gene7709
		GB40802	GB54643	GB54643	GB49505		gene10768	gene4603	gene4603			gene10770			gene11826	gene2598	gene3573	gene3951	gene6515			gene7752
		GB40804	GB49189	GB49189	GB48344		gene10770	gene4615	gene4615			gene10775			gene11839	gene2612	gene3606	gene3991	gene655			gene7759
		GB40805	GB42409	GB42409	GB53012		gene10775	gene4619	gene4619			gene10781			gene11850	gene2693	gene3671	gene4040	gene6585			gene784
		GB40808	GB53609	GB53609	GB47474		gene10781	gene4641	gene4641			gene10781			gene11852	gene2752	gene3681	gene4059	gene6588			gene786
		GB40809	GB48382	GB48382	GB42439		gene10781	gene4665	gene4665			gene10789			gene11857	gene2757	gene3685	gene4070	gene6599			gene7883
		GB40816	GB43087	GB43087	GB40159		gene10789	gene4686	gene4686			gene10804			gene11887	gene2759	gene37	gene4121	gene663			gene800
		GB40818	GB43129	GB43129	GB41700		gene10804	gene4804	gene4804			gene10804			gene11888	gene2763	gene3737	gene4122	gene6651			gene8010
		GB40838	GB49448	GB49448	GB55387		gene10804	gene4806	gene4806			gene10805			gene11892	gene2795	gene3738	gene4131	gene6707			gene8071
		GB40845	GB48621	GB48621	GB41602		gene10805	gene4847	gene4847			gene10805			gene11893	gene2800	gene3769	gene4180	gene6764			gene8095
		GB40845	GB41985	GB41985	GB48748		gene10805	gene4849	gene4849			gene10806			gene11897	gene2831	gene3797	gene4189	gene6804			gene8184
		GB40857	GB42982	GB42982	GB42685		gene10806	gene4857	gene4857			gene10808			gene11910	gene2839	gene3798	gene4192	gene6857			gene822
		GB40859	GB55898	GB55898	GB41845		gene10808	gene490	gene490			gene1081			gene11915	gene2877	gene3799	gene4206	gene6881			gene8234
		GB40865	GB45562	GB45562	GB53747		gene1081	gene4997	gene4997			gene1081			gene11939	gene2897	gene3814	gene4212	gene6910			gene8286
		GB40865	GB45642	GB45642	GB50048		gene1081	gene5013	gene5013			gene10810			gene11942	gene2922	gene3827	gene4241	gene6929			gene8302
		GB40866	GB54092	GB54092	GB50845		gene10810	gene5061	gene5061			gene10810			gene11952	gene3000	gene389	gene4249	gene6973			gene8328
		GB40866	GB46893	GB46893	GB50099		gene10810	gene5119	gene5119			gene10814			gene11971	gene3014	gene3898	gene426	gene6995			gene8359
		GB40866	GB45951	GB45951	GB53809		gene10814	gene5202	gene5202			gene10826			gene11982	gene3034	gene3959	gene4260	gene7			gene8393
		GB40866	GB42697	GB42697	GB50342		gene10826	gene5287	gene5287			gene10828			gene11994	gene3052	gene3979	gene4277	gene7009			gene8429
		GB40868	GB55268	GB55268	GB47513		gene10828	gene5298	gene5298			gene10842			gene1200	gene3053	gene3994	gene430	gene7116			gene8577
		GB40868	GB48940	GB48940	GB41376		gene10842	gene5343	gene5343			gene10849			gene12005	gene3058	gene406	gene434	gene7198			gene8678
		GB40868	GB45403	GB45403	GB51898		gene10849	gene5439	gene5439			gene10858			gene1203	gene3068	gene4070	gene436	gene7235			gene8685
		GB40868	GB43116	GB43116	GB54934		gene10858	gene5604	gene5604			gene10872			gene12049	gene3129	gene4077	gene4373	gene7262			gene8697
		GB40868	GB54388	GB54388	GB51258		gene10872	gene5617	gene5617			gene10872			gene1205	gene318	gene4079	gene4395	gene7272			gene8888
		GB40871	GB53820	GB53820	GB45640		gene10872	gene568	gene568			gene10872			gene12055	gene3202	gene4082	gene4416	gene7404			gene8900
		GB40878	GB48943	GB48943	GB44092		gene10872	gene5694	gene5694			gene10872			gene12057	gene3213	gene4122	gene442	gene7436			gene8933
		GB40885	GB44803	GB44803	GB42671		gene10872	gene5705	gene5705			gene10872			gene12059	gene3229	gene4127	gene4430	gene7452			gene8954
		GB40885	GB55496	GB55496	GB55302		gene10872	gene5720	gene5720			gene10872			gene12062	gene323	gene4180	gene4447	gene7473			gene8968
		GB40885	GB54533	GB54533	GB53782		gene10872	gene5726	gene5726			gene10872			gene12063	gene3236	gene4206	gene4485	gene7661			gene898
		GB40887	GB44544	GB44544	GB43612		gene10872	gene5782	gene5782			gene10872			gene1211	gene3284	gene4212	gene4512	gene7681			gene9016
		GB40894	GB49071	GB49071	GB41547		gene10872	gene5868	gene5868			gene10872			gene12126	gene3297	gene4214	gene4515	gene7682			gene9031
		GB40901	GB46962	GB46962	GB52039		gene10872	gene5871	gene5871			gene10872			gene12157	gene3302	gene426	gene4517	gene7709			gene9049
		GB40906	GB54661	GB54661	GB40906		gene10872	gene5907	gene5907			gene10873			gene12161	gene3343	gene4267	gene4587	gene7759			gene9072
		GB40906	GB52563	GB52563	GB43476		gene10873	gene5957	gene5957			gene10873			gene12193	gene3348	gene4335	gene4603	gene784			gene9114
		GB40906	GB44770	GB44770	GB42334		gene10873	gene5995	gene5995			gene10873			gene12208	gene3354	gene434	gene4615	gene7852			gene913
		GB40906	GB43882	GB43882	GB45459		gene10873	gene6012	gene6012			gene10873			gene12210	gene3358	gene437	gene4619	gene7883			gene9177
		GB40908	GB49112	GB49112	GB47049		gene10873	gene6066	gene6066			gene10873			gene1224	gene339	gene4416	gene463	gene8071			gene9204
		GB40908	GB49410	GB49410	GB43167		gene10873	gene6099	gene6099			gene10873			gene12248	gene3416	gene4417	gene4641	gene8095			gene9255
		GB40908	GB50683	GB50683	GB49755		gene10873	gene613	gene613			gene10873			gene12318	gene3442	gene4419	gene4652	gene8110			gene9294
		GB40911	GB55432	GB55432	GB53468		gene10873	gene6143	gene6143			gene10873			gene1236	gene3445	gene442	gene4677	gene8172			gene9325
		GB40916	GB48325	GB48325	GB50226		gene10873	gene6176	gene6176			gene10873			gene1250	gene3463	gene4430	gene4683	gene8184			gene9364
		GB40923	GB49992	GB49992	GB44917		gene10873	gene618	gene618			gene10879			gene1261	gene347	gene4435	gene4686	gene822			gene940
		GB40923	GB54369	GB54369	GB47799		gene10879	gene6191	gene6191			gene10888			gene127	gene3482	gene4444	gene4823	gene8234			gene943
		GB40923	GB43196	GB43196	GB45142		gene10888	gene6261	gene6261			gene10900			gene1282	gene3524	gene4473	gene4847	gene8239			gene9460
		GB40928	GB44972	GB44972	GB54947		gene10900	gene6265	gene6265			gene10903			gene1308	gene3527	gene4488	gene4849	gene8286			gene9523
		GB40934	GB53376	GB53376	GB50377		gene10903	gene6267	gene6267			gene10905			gene131	gene3562	gene4511	gene4879	gene8302			gene9541
		GB40941	GB47017	GB47017	GB52426		gene10905	gene6366	gene6366			gene10906			gene1313	gene3616	gene4517	gene490	gene8375			gene964
		GB40941	GB40083	GB40083	GB52604		gene10906	gene6407	gene6407			gene1091			gene1317	gene3622	gene4584	gene4961	gene8392			gene9659
		GB40945	GB47041	GB47041	GB44582		gene1091	gene6411	gene6411			gene10910			gene1364	gene3678	gene4591	gene5013	gene8403			gene9694
		GB40946	GB44283	GB44283	GB54508		gene10910	gene642	gene642			gene10912			gene1367	gene3687	gene4615	gene5061	gene8465			gene9736
		GB40946	GB42110	GB42110	GB40703		gene10912	gene6431	gene6431			gene10912			gene1379	gene3763	gene464	gene507	gene8502			gene9800
		GB40967	GB49223	GB49223	GB52466		gene10912	gene6485	gene6485			gene10917			gene1395	gene3765	gene4663	gene5119	gene8577			gene992
		GB40969	GB47478	GB47478	GB44330		gene10917	gene6515	gene6515			gene10918			gene1398	gene3803	gene4669	gene5151	gene8589			gene9985
		GB40973	GB45070	GB45070	GB46128		gene10918	gene655	gene655			gene10926			gene1407	gene3859	gene4675	gene5173	gene859			gene9992
		GB40975	GB55512	GB55512	GB51727		gene10926	gene6585	gene6585			gene10931			gene1408	gene3861	gene474	gene5202	gene8611
		GB40976	GB49921	GB49921	GB55556		gene10931	gene6588	gene6588			gene10934			gene1418	gene3887	gene4765	gene5262	gene8678
		GB40976	GB54808	GB54808	GB47584		gene10934	gene6599	gene6599			gene10934			gene1425	gene3897	gene4783	gene5265	gene8685
		GB40976	GB44462	GB44462	GB55930		gene10934	gene663	gene663			gene10935			gene1442	gene3930	gene4853	gene5287	gene8697
		GB40977	GB46112	GB46112	GB45795		gene10935	gene6651	gene6651			gene1094			gene1458	gene3950	gene4871	gene5343	gene8701
		GB40977	GB53699	GB53699	GB42501		gene1094	gene6669	gene6669			gene10940			gene1464	gene396	gene490	gene5345	gene8824
		GB40980	GB44849	GB44849	GB52345		gene10940	gene6707	gene6707			gene10941			gene1491	gene3969	gene4933	gene5351	gene8952
		GB40980	GB43236	GB43236	GB46076		gene10941	gene6764	gene6764			gene10948			gene1492	gene3982	gene4971	gene542	gene8954
		GB40986	GB50679	GB50679	GB46135		gene10948	gene6804	gene6804			gene10956			gene15	gene4005	gene4989	gene5439	gene8968
		GB40996	GB41988	GB41988	GB44387		gene10956	gene6857	gene6857			gene10957			gene151	gene4010	gene4996	gene5489	gene898
		GB40997	GB45852	GB45852	GB43788		gene10957	gene6881	gene6881			gene10958			gene1534	gene4016	gene5034	gene5511	gene9016
		GB40999	GB47308	GB47308	GB50947		gene10958	gene690	gene690			gene10959			gene1547	gene4023	gene507	gene5617	gene9049
		GB41003	GB47977	GB47977	GB41681		gene10959	gene6910	gene6910			gene10960			gene1555	gene4076	gene5107	gene568	gene9063
		GB41011	GB47299	GB47299	GB42767		gene10960	gene692	gene692			gene10960			gene1556	gene4100	gene5142	gene5694	gene913
		GB41011	GB47543	GB47543	GB42593		gene10960	gene6929	gene6929			gene10973			gene1563	gene4131	gene5150	gene5704	gene9189
		GB41011	GB44685	GB44685	GB51809		gene10973	gene696	gene696			gene10975			gene1585	gene4169	gene5166	gene5716	gene9294
		GB41011	GB45617	GB45617	GB44634		gene10975	gene6973	gene6973			gene10977			gene1586	gene4178	gene5173	gene5720	gene9342
		GB41011	GB53122	GB53122	GB44056		gene10977	gene6995	gene6995			gene10980			gene1593	gene4189	gene5227	gene5726	gene9364
		GB41011	GB55658	GB55658	GB40426		gene10980	gene7	gene7			gene10980			gene1594	gene4239	gene5287	gene5782	gene940
		GB41011	GB45348	GB45348	GB50010		gene10980	gene7008	gene7008			gene10984			gene1630	gene4240	gene529	gene5807	gene943
		GB41025	GB46129	GB46129	GB52992		gene10984	gene7009	gene7009			gene10993			gene1631	gene4244	gene5319	gene5857	gene9459
		GB41027	GB47661	GB47661	GB48247		gene10993	gene7062	gene7062			gene10996			gene1639	gene4260	gene5343	gene5868	gene9460
		GB41028	GB47189	GB47189	GB51849		gene10996	gene7116	gene7116			gene10996			gene165	gene4277	gene5361	gene5871	gene9523
		GB41030	GB52104	GB52104	GB53620		gene10996	gene7194	gene7194			gene10996			gene1677	gene4304	gene539	gene5907	gene9541
		GB41030	GB46243	GB46243	GB53503		gene10996	gene7198	gene7198			gene11002			gene1684	gene4360	gene5391	gene5936	gene9660
		GB41043	GB45878	GB45878	GB52465		gene11002	gene7235	gene7235			gene11005			gene1703	gene4363	gene542	gene5957	gene9694
		GB41045	GB50024	GB50024	GB51019		gene11005	gene7262	gene7262			gene11005			gene171	gene4373	gene5422	gene5958	gene9905
		GB41046	GB44426	GB44426	GB47148		gene11005	gene7272	gene7272			gene1101			gene1712	gene4380	gene5451	gene5963	gene992
		GB41046	GB42147	GB42147	GB41867		gene1101	gene7397	gene7397			gene11012			gene1724	gene4432	gene5454	gene6012	gene994
		GB41063	GB52424	GB52424	GB49321		gene11012	gene7404	gene7404			gene11014			gene173	gene445	gene5465	gene6066	gene9940
		GB41063	GB50175	GB50175	GB45159		gene11014	gene7436	gene7436			gene11014			gene1741	gene4463	gene5473	gene6087	gene9948
		GB41065	GB50973	GB50973	GB40866		gene11014	gene7452	gene7452			gene11029			gene1770	gene4478	gene5511	gene6097	gene9985
		GB41068	GB53695	GB53695	GB54467		gene11029	gene7473	gene7473			gene1103			gene1785	gene4485	gene5534	gene6099	gene9992
		GB41069	GB55395	GB55395	GB43168		gene1103	gene7538	gene7538			gene11032			gene1799	gene4537	gene561	gene613
		GB41069	GB40063	GB40063	GB47224		gene11032	gene7661	gene7661			gene1104			gene180	gene4564	gene5611	gene6162
		GB41069	GB45037	GB45037	GB44963		gene1104	gene7681	gene7681			gene11041			gene1800	gene463	gene5614	gene6173
		GB41073	GB50247	GB50247	GB40525		gene11041	gene7682	gene7682			gene11041			gene1827	gene4641	gene5720	gene6176
		GB41079	GB53045	GB53045	GB43248		gene11041	gene7709	gene7709			gene11044			gene1846	gene465	gene5726	gene618
		GB41127	GB41231	GB41231	GB45758		gene11044	gene7751	gene7751			gene11044			gene1858	gene4667	gene5728	gene6191
		GB41129	GB43706	GB43706	GB46277		gene11044	gene7759	gene7759			gene11045			gene1887	gene4677	gene5743	gene6243
		GB41134	GB50700	GB50700	GB42997		gene11045	gene7790	gene7790			gene11046			gene1896	gene4686	gene5766	gene6261
		GB41139	GB40541	GB40541	GB50730		gene11046	gene784	gene784			gene11046			gene1905	gene4701	gene578	gene6265
		GB41143	GB53780	GB53780	GB44841		gene11046	gene7852	gene7852			gene1105			gene1914	gene4717	gene5807	gene6267
		GB41146	GB55587	GB55587	GB44276		gene1105	gene7883	gene7883			gene11052			gene195	gene4761	gene5814	gene6274
		GB41147	GB43820	GB43820	GB52360		gene11052	gene7909	gene7909			gene11053			gene196	gene4798	gene582	gene6366
		GB41150	GB47807	GB47807	GB55016		gene11053	gene8071	gene8071			gene11067			gene1995	gene4802	gene5868	gene6383
		GB41152	GB42918	GB42918	GB55190		gene11067	gene8095	gene8095			gene11080			gene2	gene4859	gene5894	gene6385
		GB41152	GB52674	GB52674	GB45909		gene11080	gene8110	gene8110			gene11086			gene2007	gene4879	gene594	gene6411
		GB41154	GB53491	GB53491	GB54219		gene11086	gene8172	gene8172			gene11086			gene2015	gene496	gene5957	gene642
		GB41156	GB49249	GB49249	GB51125		gene11086	gene8184	gene8184			gene11086			gene2061	gene4966	gene5968	gene6431
		GB41156	GB48894	GB48894	GB46774		gene11086	gene822	gene822			gene11091			gene2086	gene4973	gene5999	gene6485
		GB41156	GB53373	GB53373	GB43022		gene11091	gene8234	gene8234			gene11092			gene2096	gene5020	gene6	gene6515
		GB41156	GB41260	GB41260	GB47503		gene11092	gene8239	gene8239			gene11094			gene210	gene5048	gene6004	gene655
		GB41158	GB50637	GB50637	GB55515		gene11094	gene8286	gene8286			gene11098			gene2111	gene5081	gene6012	gene6585
		GB41164	GB45099	GB45099	GB47430		gene11098	gene8302	gene8302			gene11099			gene2131	gene5103	gene6063	gene6588
		GB41165	GB44396	GB44396	GB55004		gene11099	gene8375	gene8375			gene11105			gene2132	gene5121	gene6086	gene6599
		GB41165	GB44939	GB44939	GB40976		gene11105	gene8392	gene8392			gene11106			gene2135	gene5129	gene6087	gene663
		GB41168	GB49283	GB49283	GB47136		gene11106	gene8403	gene8403			gene11106			gene2137	gene5156	gene6097	gene6651
		GB41169	GB54753	GB54753	GB44988		gene11106	gene8465	gene8465			gene11108			gene2144	gene5244	gene6105	gene6698
		GB41174	GB42039	GB42039	GB44503		gene11108	gene8502	gene8502			gene11108			gene2147	gene5262	gene6115	gene6707
		GB41176	GB51002	GB51002	GB43418		gene11108	gene8577	gene8577			gene11116			gene2158	gene5286	gene6149	gene6757
		GB41179	GB51774	GB51774	GB46697		gene11116	gene8589	gene8589			gene11116			gene2160	gene5301	gene616	gene6764
		GB41189	GB46291	GB46291	GB44207		gene11116	gene859	gene859			gene11116			gene2162	gene5337	gene6170	gene6792
		GB41196	GB48250	GB48250	GB50572		gene11116	gene8611	gene8611			gene11116			gene2174	gene5458	gene6223	gene6798
		GB41203	GB41413	GB41413	GB53372		gene11116	gene8617	gene8617			gene11116			gene2175	gene5459	gene6225	gene6804
		GB41207	GB50819	GB50819			gene11116	gene8678	gene8678			gene11118			gene2187	gene5461	gene6258	gene6844
		GB41208	GB53070	GB53070			gene11118	gene8685	gene8685			gene11119			gene2193	gene5496	gene6347	gene6857
		GB41231	GB47880	GB47880			gene11119	gene8697	gene8697			gene11129			gene2208	gene550	gene6365	gene6881
		GB41241	GB40457	GB40457			gene11129	gene8701	gene8701			gene11130			gene2211	gene5514	gene6392	gene6910
		GB41246	GB40301	GB40301			gene11130	gene8824	gene8824			gene11131			gene2215	gene5555	gene6411	gene6929
		GB41246	GB42858	GB42858			gene11131	gene8904	gene8904			gene11132			gene2226	gene5559	gene6433	gene6937
		GB41259	GB53490	GB53490			gene11132	gene8952	gene8952			gene11136			gene2237	gene5565	gene6478	gene6944
		GB41262	GB47744	GB47744			gene11136	gene8954	gene8954			gene11140			gene2251	gene5594	gene6585	gene6951
		GB41262	GB48630	GB48630			gene11140	gene8968	gene8968			gene11140			gene2255	gene5613	gene6599	gene6973
		GB41280	GB51015	GB51015			gene11140	gene898	gene898			gene11140			gene2258	gene5621	gene6608	gene6995
		GB41283	GB52316	GB52316			gene11140	gene8992	gene8992			gene11146			gene227	gene569	gene6638	gene7
		GB41285	GB51479	GB51479			gene11146	gene9016	gene9016			gene11146			gene2271	gene5694	gene6681	gene7009
		GB41287	GB42165	GB42165			gene11146	gene9049	gene9049			gene11146			gene2274	gene5699	gene6720	gene7022
		GB41288	GB50271	GB50271			gene11146	gene9063	gene9063			gene11150			gene2277	gene5704	gene6721	gene7047
		GB41289	GB46214	GB46214			gene11150	gene9128	gene9128			gene11153			gene2283	gene571	gene6723	gene7085
		GB41289	GB51806	GB51806			gene11153	gene913	gene913			gene11157			gene2318	gene5716	gene6802	gene7086
		GB41304	GB40809	GB40809			gene11157	gene9174	gene9174			gene11158			gene2322	gene5721	gene6810	gene7116
		GB41332	GB44809	GB44809			gene11158	gene9189	gene9189			gene11159			gene2333	gene5741	gene6818	gene7198
		GB41332	GB45972	GB45972			gene11159	gene9294	gene9294			gene11160			gene2346	gene5792	gene6819	gene7227
		GB41332	GB55558	GB55558			gene11160	gene9329	gene9329			gene11170			gene2348	gene5793	gene6830	gene7235
		GB41343	GB52074	GB52074			gene11170	gene9342	gene9342			gene11183			gene2352	gene583	gene6857	gene7262
		GB41345	GB54537	GB54537			gene11183	gene9364	gene9364			gene11200			gene2360	gene5857	gene6896	gene7272
		GB41358	GB44888	GB44888			gene11200	gene9381	gene9381			gene11205			gene2365	gene5879	gene6929	gene7280
		GB41363	GB47394	GB47394			gene11205	gene940	gene940			gene11206			gene2376	gene588	gene694	gene7315
		GB41364	GB53323	GB53323			gene11206	gene943	gene943			gene11206			gene2383	gene5907	gene6940	gene7332
		GB41366	GB44870	GB44870			gene11206	gene9445	gene9445			gene1121			gene2384	gene591	gene6953	gene7404
		GB41366	GB44119	GB44119			gene1121	gene9459	gene9459			gene11213			gene2386	gene5940	gene6977	gene7436
		GB41372	GB52786	GB52786			gene11213	gene9460	gene9460			gene11218			gene2387	gene5959	gene6998	gene7443
		GB41372	GB44141	GB44141			gene11218	gene9467	gene9467			gene11227			gene2389	gene5963	gene7004	gene7452
		GB41372	GB51337	GB51337			gene11227	gene9516	gene9516			gene1123			gene2391	gene6054	gene7009	gene7473
		GB41372	GB41872	GB41872			gene1123	gene9523	gene9523			gene1124			gene2392	gene6067	gene7016	gene7577
		GB41376	GB42057	GB42057			gene1124	gene9541	gene9541			gene11245			gene2403	gene607	gene7042	gene7661
		GB41376	GB41710	GB41710			gene11245	gene9609	gene9609			gene11246			gene2427	gene6099	gene7058	gene7681
		GB41376	GB41802	GB41802			gene11246	gene9652	gene9652			gene1125			gene2428	gene610	gene7086	gene7682
		GB41378	GB53447	GB53447			gene1125	gene9653	gene9653			gene1125			gene2429	gene6112	gene7093	gene7696
		GB41398	GB47045	GB47045			gene1125	gene9660	gene9660			gene1125			gene243	gene6128	gene710	gene7709
		GB41401	GB55643	GB55643			gene1125	gene9694	gene9694			gene1125			gene2433	gene6162	gene7116	gene7752
		GB41401	GB41910	GB41910			gene1125	gene9839	gene9839			gene1125			gene2443	gene6173	gene7218	gene7759
		GB41401	GB42312	GB42312			gene1125	gene9891	gene9891			gene11258			gene2448	gene6176	gene7235	gene784
		GB41413	GB55434	GB55434			gene11258	gene9905	gene9905			gene1126			gene2466	gene6189	gene7262	gene7852
		GB41414	GB45248	GB45248			gene1126	gene992	gene992			gene11260			gene2499	gene6216	gene7272	gene7853
		GB41414	GB41898	GB41898			gene11260	gene994	gene994			gene11263			gene2523	gene6219	gene7342	gene786
		GB41417	GB47509	GB47509			gene11263	gene9940	gene9940			gene11265			gene2552	gene6227	gene735	gene7866
		GB41423	GB47996	GB47996			gene11265	gene9948	gene9948			gene11267			gene2598	gene6228	gene7362	gene7883
		GB41425	GB40302	GB40302			gene11267	gene9951	gene9951			gene11267			gene2611	gene6230	gene740	gene7889
		GB41425	GB45375	GB45375			gene11267	gene9985	gene9985			gene1127			gene2612	gene6237	gene7404	gene800
		GB41427	GB53340	GB53340			gene1127	gene9992	gene9992			gene11270			gene2622	gene6261	gene7415	gene8010
		GB41427	GB50943	GB50943			gene11270	gene10032				gene11272			gene2677	gene6265	gene7463	gene8071
		GB41428	GB54452	GB54452			gene11272	gene10109				gene11287			gene2693	gene6359	gene747	gene8095
		GB41449	GB49886	GB49886			gene11287	gene10184				gene11288			gene27	gene6364	gene7470	gene8110
		GB41464	GB45624	GB45624			gene11288	gene10232				gene1129			gene2705	gene6366	gene7640	gene8172
		GB41469	GB50728	GB50728			gene1129	gene10234				gene1129			gene2723	gene6369	gene7645	gene8184
		GB41471	GB48097	GB48097			gene1129	gene10262				gene1129			gene2746	gene6370	gene7647	gene822
		GB41487	GB48365	GB48365			gene1129	gene1035				gene11293			gene2752	gene6379	gene7657	gene8234
		GB41491	GB46982	GB46982			gene11293	gene10427				gene11297			gene2757	gene6385	gene7661	gene8239
		GB41516	GB42175	GB42175			gene11297	gene1047				gene11300			gene2759	gene6395	gene7665	gene8281
		GB41519	GB51973	GB51973			gene11300	gene10730				gene11300			gene2763	gene6406	gene7670	gene8286
		GB41521	GB45937	GB45937			gene11300	gene10745				gene11310			gene2774	gene6410	gene7681	gene8289
		GB41521	GB46145	GB46145			gene11310	gene10782				gene11313			gene2778	gene642	gene7682	gene8302
		GB41522	GB50553	GB50553			gene11313	gene10810				gene11317			gene2781	gene6489	gene769	gene8328
		GB41522	GB53421	GB53421			gene11317	gene10900				gene11317			gene2795	gene6513	gene7696	gene8359
		GB41523	GB52732	GB52732			gene11317	gene10973				gene11318			gene2798	gene6519	gene7701	gene8375
		GB41543	GB53140	GB53140			gene11318	gene11146				gene1132			gene2800	gene6550	gene7709	gene8392
		GB41547	GB50207	GB50207			gene1132	gene11157				gene1132			gene283	gene6571	gene7732	gene8393
		GB41547	GB40422	GB40422			gene1132	gene1136				gene1132			gene2831	gene658	gene7756	gene8403
		GB41598	GB54692	GB54692			gene1132	gene11366				gene1132			gene2839	gene6588	gene7757	gene8429
		GB41602	GB43999	GB43999			gene1132	gene11386				gene1132			gene2845	gene663	gene7761	gene8455
		GB41602	GB46066	GB46066			gene1132	gene11401				gene1132			gene2877	gene6636	gene7767	gene8465
		GB41602	GB40517	GB40517			gene1132	gene11443				gene1132			gene2897	gene6639	gene777	gene8502
		GB41602	GB49936	GB49936			gene1132	gene11555				gene1132			gene2898	gene6643	gene7786	gene8559
		GB41603	GB52827	GB52827			gene1132	gene11583				gene1132			gene2922	gene6657	gene7804	gene8577
		GB41603	GB46761	GB46761			gene1132	gene11592				gene11324			gene2933	gene6658	gene784	gene8589
		GB41604	GB47876	GB47876			gene11324	gene11641				gene11324			gene2935	gene668	gene786	gene859
		GB41606	GB46274	GB46274			gene11324	gene11725				gene11330			gene2989	gene6698	gene7865	gene8611
		GB41606	GB41735	GB41735			gene11330	gene11801				gene11331			gene3	gene6717	gene7869	gene8678
		GB41609	GB44873	GB44873			gene11331	gene1197				gene11331			gene3000	gene6747	gene7873	gene8685
		GB41617	GB43842	GB43842			gene11331	gene11985				gene11333			gene3014	gene6757	gene7876	gene8697
		GB41625	GB44588	GB44588			gene11333	gene12016				gene11336			gene3027	gene6758	gene7899	gene8701
		GB41628	GB53705	GB53705			gene11336	gene1213				gene11338			gene3034	gene6760	gene7910	gene8824
		GB41629	GB55581	GB55581			gene11338	gene12173				gene11338			gene3041	gene6771	gene7925	gene8888
		GB41629	GB52736	GB52736			gene11338	gene12178				gene11338			gene3052	gene6781	gene7934	gene8900
		GB41629	GB49990	GB49990			gene11338	gene1354				gene11338			gene3053	gene6788	gene7963	gene8933
		GB41634	GB49101	GB49101			gene11338	gene1379				gene11341			gene3058	gene6792	gene7984	gene8952
		GB41642	GB55287	GB55287			gene11341	gene15				gene11344			gene3068	gene6807	gene7986	gene8954
		GB41645	GB50994	GB50994			gene11344	gene1585				gene11350			gene3094	gene684	gene7989	gene8968
		GB41645	GB45831	GB45831			gene11350	gene1631				gene11353			gene31	gene6842	gene7999	gene898
		GB41645	GB54990	GB54990			gene11353	gene1684				gene11353			gene3104	gene6866	gene800	gene9016
		GB41645	GB49069	GB49069			gene11353	gene1819				gene11358			gene3115	gene6907	gene807	gene9031
		GB41645	GB43826	GB43826			gene11358	gene1827				gene11358			gene3129	gene6915	gene8070	gene9049
		GB41646	GB43086	GB43086			gene11358	gene1830				gene1136			gene3131	gene6926	gene8071	gene9063
		GB41651	GB48308	GB48308			gene1136	gene1858				gene1136			gene3156	gene6959	gene8095	gene9072
		GB41653	GB49106	GB49106			gene1136	gene186				gene11367			gene3179	gene6965	gene811	gene9114
		GB41654	GB40313	GB40313			gene11367	gene1887				gene11374			gene318	gene698	gene8131	gene913
		GB41659	GB47443	GB47443			gene11374	gene1896				gene11381			gene3202	gene6995	gene8162	gene9177
		GB41659	GB43155	GB43155			gene11381	gene1914				gene11381			gene3213	gene7019	gene8166	gene9189
		GB41659	GB44914	GB44914			gene11381	gene1998				gene11382			gene3218	gene7033	gene8184	gene9204
		GB41665	GB41711	GB41711			gene11382	gene1999				gene11401			gene3229	gene7034	gene8187	gene922
		GB41667	GB44642	GB44642			gene11401	gene2007				gene11401			gene323	gene7057	gene8197	gene9255
		GB41668	GB44850	GB44850			gene11401	gene2144				gene11401			gene3236	gene7082	gene8202	gene9294
		GB41669	GB43429	GB43429			gene11401	gene2284				gene11420			gene3240	gene7085	gene8209	gene9325
		GB41670	GB47192	GB47192			gene11420	gene2325				gene11422			gene3253	gene709	gene8210	gene9342
		GB41671	GB40980	GB40980			gene11422	gene2387				gene11422			gene327	gene7126	gene8211	gene9364
		GB41672	GB40808	GB40808			gene11422	gene2388				gene11427			gene328	gene7163	gene822	gene9395
		GB41680	GB40222	GB40222			gene11427	gene2615				gene1146			gene3280	gene7165	gene8223	gene9399
		GB41681	GB40243	GB40243			gene1146	gene2660				gene11461			gene3284	gene7180	gene823	gene940
		GB41681	GB41645	GB41645			gene11461	gene2693				gene11462			gene3297	gene7181	gene8258	gene943
		GB41681	GB53976	GB53976			gene11462	gene2774				gene1147			gene3299	gene7198	gene8259	gene9459
		GB41688	GB46767	GB46767			gene1147	gene2856				gene11472			gene3302	gene7215	gene8302	gene9460
		GB41690	GB47007	GB47007			gene11472	gene2927				gene11472			gene3343	gene7277	gene8328	gene9523
		GB41697	GB48854	GB48854			gene11472	gene3057				gene11472			gene3345	gene728	gene8338	gene9537
		GB41699	GB47767	GB47767			gene11472	gene3186				gene11472			gene3348	gene7280	gene8426	gene9541
		GB41700	GB45276	GB45276			gene11472	gene319				gene11473			gene3354	gene7291	gene8458	gene964
		GB41701	GB54760	GB54760			gene11473	gene328				gene11481			gene3358	gene7312	gene8498	gene9659
		GB41701	GB47829	GB47829			gene11481	gene3339				gene11495			gene339	gene7330	gene8503	gene9660
		GB41703	GB48309	GB48309			gene11495	gene3443				gene11495			gene3416	gene7353	gene8514	gene9694
		GB41703	GB53067	GB53067			gene11495	gene3479				gene11522			gene3429	gene7369	gene8539	gene9736
		GB41704	GB52773	GB52773			gene11514	gene3527				gene11539			gene3439	gene7405	gene8541	gene9800
		GB41710	GB41158	GB41158			gene11522	gene3562				gene11547			gene3442	gene7421	gene8571	gene987
		GB41711	GB53211	GB53211			gene11539	gene3681				gene11547			gene3445	gene7443	gene8577	gene9905
		GB41714	GB45044	GB45044			gene11547	gene370				gene11548			gene3463	gene7473	gene8597	gene992
		GB41715	GB55403	GB55403			gene11547	gene3722				gene11548			gene347	gene7475	gene8618	gene994
		GB41735	GB41443	GB41443			gene11548	gene3732				gene11555			gene3482	gene7542	gene8675	gene9940
		GB41740	GB53719	GB53719			gene11548	gene3800				gene11555			gene3508	gene7555	gene8678	gene9948
		GB41740	GB52977	GB52977			gene11555	gene3810				gene11558			gene3524	gene7558	gene8685	gene9985
		GB41747	GB52348	GB52348			gene11555	gene3844				gene1157			gene3527	gene756	gene8706	gene9992
		GB41751	GB48859	GB48859			gene11558	gene3868				gene11573			gene3562	gene7609	gene8731
		GB41753	GB40414	GB40414			gene1157	gene3901				gene11573			gene3573	gene7695	gene8761
		GB41754	GB44725	GB44725			gene11573	gene3930				gene11573			gene3606	gene7725	gene8782
		GB41756	GB53039	GB53039			gene11573	gene3951				gene11573			gene3616	gene7737	gene8790
		GB41770	GB53670	GB53670			gene11573	gene4131				gene11574			gene3622	gene7752	gene8803
		GB41773	GB46322	GB46322			gene11573	gene4180				gene11574			gene3671	gene7754	gene8816
		GB41775	GB55648	GB55648			gene11574	gene4189				gene11583			gene3678	gene7759	gene8853
		GB41775	GB45653	GB45653			gene11574	gene4212				gene11583			gene3681	gene7764	gene8858
		GB41781	GB40911	GB40911			gene11580	gene4249				gene11583			gene3685	gene7780	gene887
		GB41782	GB51999	GB51999			gene11580	gene426				gene11583			gene3687	gene7823	gene8873
		GB41786	GB53725	GB53725			gene11583	gene4373				gene11583			gene37	gene7846	gene8897
		GB41786	GB55941	GB55941			gene11583	gene4447				gene11587			gene3737	gene7851	gene8900
		GB41786	GB55015	GB55015			gene11583	gene4512				gene11588			gene3738	gene7883	gene895
		GB41792	GB55875	GB55875			gene11583	gene4515				gene11588			gene3763	gene7901	gene8954
		GB41793	GB41980	GB41980			gene11583	gene4589				gene11592			gene3765	gene7935	gene8968
		GB41794	GB50686	GB50686			gene11587	gene463				gene11592			gene3769	gene7937	gene8991
		GB41796	GB44180	GB44180			gene11588	gene4652				gene11594			gene3797	gene7978	gene9031
		GB41797	GB46521	GB46521			gene11588	gene4677				gene11594			gene3798	gene7988	gene9049
		GB41798	GB50189	GB50189			gene11592	gene4683				gene1160			gene3799	gene7991	gene9064
		GB41803	GB47351	GB47351			gene11592	gene4823				gene11604			gene3803	gene8010	gene9067
		GB41806	GB47120	GB47120			gene11594	gene4879				gene11610			gene3814	gene8015	gene9070
		GB41808	GB52999	GB52999			gene11594	gene4961				gene11613			gene3827	gene8039	gene9076
		GB41808	GB53862	GB53862			gene1160	gene507				gene11615			gene3859	gene8084	gene9078
		GB41811	GB54341	GB54341			gene11604	gene5151				gene11616			gene3861	gene8109	gene9089
		GB41811	GB52739	GB52739			gene11610	gene5173				gene11616			gene3887	gene8140	gene9090
		GB41815	GB50069	GB50069			gene11613	gene5262				gene1162			gene389	gene8152	gene9118
		GB41821	GB44573	GB44573			gene11615	gene5265				gene1162			gene3897	gene8153	gene913
		GB41821	GB47875	GB47875			gene11616	gene5345				gene1162			gene3898	gene8181	gene9177
		GB41821	GB42674	GB42674			gene11616	gene5351				gene1162			gene3930	gene8222	gene9186
		GB41822	GB43121	GB43121			gene1162	gene542				gene11628			gene3950	gene8224	gene9199
		GB41824	GB46565	GB46565			gene1162	gene5489				gene11628			gene3959	gene8234	gene9202
		GB41825	GB52907	GB52907			gene1162	gene5511				gene11628			gene396	gene8245	gene9209
		GB41829	GB53432	GB53432			gene1162	gene5704				gene11628			gene3969	gene8256	gene9249
		GB41835	GB51334	GB51334			gene11628	gene5716				gene11628			gene3979	gene8261	gene9255
		GB41836	GB49696	GB49696			gene11628	gene574				gene11641			gene3982	gene8274	gene9335
		GB41836	GB50117	GB50117			gene11628	gene5807				gene11641			gene3994	gene8285	gene9336
		GB41839	GB45247	GB45247			gene11628	gene5857				gene11641			gene4005	gene8286	gene9364
		GB41842	GB49129	GB49129			gene11628	gene5936				gene11641			gene4010	gene833	gene940
		GB41845	GB54140	GB54140			gene11641	gene5958				gene11641			gene4016	gene8339	gene943
		GB41845	GB46395	GB46395			gene11641	gene5963				gene11641			gene4023	gene8359	gene9448
		GB41846	GB41491	GB41491			gene11641	gene6087				gene11641			gene406	gene8393	gene9488
		GB41847	GB49247	GB49247			gene11641	gene6097				gene11641			gene4070	gene8415	gene9492
		GB41847	GB55744	GB55744			gene11641	gene6154				gene11641			gene4076	gene8425	gene9508
		GB41847	GB42224	GB42224			gene11641	gene6162				gene11641			gene4077	gene8429	gene9513
		GB41848	GB43122	GB43122			gene11641	gene6167				gene11641			gene4079	gene8459	gene9519
		GB41855	GB49318	GB49318			gene11641	gene6173				gene11641			gene4082	gene8461	gene953
		GB41859	GB46091	GB46091			gene11641	gene6243				gene11641			gene4100	gene8522	gene9541
		GB41862	GB45970	GB45970			gene11641	gene6274				gene11641			gene4122	gene8523	gene9641
		GB41863	GB41667	GB41667			gene11641	gene6383				gene11641			gene4127	gene8534	gene9659
		GB41867	GB47901	GB47901			gene11641	gene6385				gene11641			gene4131	gene8549	gene9662
		GB41872	GB41079	GB41079			gene11641	gene6394				gene11641			gene4169	gene858	gene9698
		GB41872	GB52803	GB52803			gene11641	gene6494				gene11641			gene4178	gene8697	gene9742
		GB41882	GB40733	GB40733			gene11641	gene6698				gene11641			gene4180	gene8784	gene9746
		GB41882	GB41110	GB41110			gene11641	gene6757				gene11641			gene4189	gene8813	gene977
		GB41886	GB44152	GB44152			gene11641	gene6792				gene11641			gene4206	gene8835	gene9787
		GB41889	GB40804	GB40804			gene11641	gene6798				gene11641			gene4212	gene8888	gene9793
		GB41895	GB55152	GB55152			gene11641	gene6844				gene11641			gene4214	gene8906	gene9812
		GB41898	GB52236	GB52236			gene11641	gene6937				gene11641			gene4239	gene8933	gene9817
		GB41898	GB49108	GB49108			gene11641	gene6944				gene11641			gene4240	gene8936	gene9821
		GB41901	GB47026	GB47026			gene11641	gene6951				gene11641			gene4244	gene8940	gene9823
		GB41904	GB51526	GB51526			gene11641	gene6981				gene11641			gene426	gene898	gene9855
		GB41908	GB52211	GB52211			gene11641	gene7022				gene11648			gene4260	gene9016	gene9869
		GB41908	GB52742	GB52742			gene11641	gene7047				gene11648			gene4267	gene9053	gene9882
		GB41908	GB49343	GB49343			gene11641	gene7085				gene11649			gene4277	gene9072	gene989
		GB41908	GB42032	GB42032			gene11641	gene7086				gene11650			gene4304	gene9114	gene992
		GB41908	GB48535	GB48535			gene11648	gene7227				gene11654			gene4335	gene9155	gene995
		GB41912	GB47296	GB47296			gene11648	gene7280				gene11659			gene434	gene9161	gene9970
		GB41922	GB44867	GB44867			gene11649	gene7315				gene11660			gene4360	gene9167	gene9982
		GB41942	GB52613	GB52613			gene11650	gene7332				gene11682			gene4363	gene920
		GB41942	GB55390	GB55390			gene11654	gene7363				gene11682			gene437	gene9201
		GB41946	GB55919	GB55919			gene11659	gene7443				gene11682			gene4373	gene9204
		GB41979	GB42952	GB42952			gene11660	gene7577				gene11682			gene4380	gene9236
		GB41980	GB40923	GB40923			gene11682	gene7696				gene11689			gene4416	gene9257
		GB41980	GB44567	GB44567			gene11682	gene7752				gene11695			gene4417	gene9260
		GB41980	GB44532	GB44532			gene11682	gene7853				gene11696			gene4419	gene9276
		GB41980	GB54952	GB54952			gene11682	gene786				gene11696			gene442	gene9287
		GB41982	GB51838	GB51838			gene11689	gene7866				gene11697			gene4430	gene9294
		GB41983	GB52262	GB52262			gene11695	gene7889				gene11717			gene4432	gene9299
		GB41985	GB54545	GB54545			gene11696	gene7995				gene11733			gene4435	gene9301
		GB41988	GB40856	GB40856			gene11696	gene800				gene11737			gene4444	gene9304
		GB42014	GB46564	GB46564			gene11697	gene8010				gene11743			gene445	gene9306
		GB42014	GB45623	GB45623			gene11717	gene8248				gene11744			gene4463	gene9312
		GB42016	GB50295	GB50295			gene11733	gene8281				gene11746			gene4473	gene9315
		GB42021	GB47039	GB47039			gene11737	gene8289				gene11747			gene4478	gene9316
		GB42021	GB45873	GB45873			gene11743	gene8328				gene11747			gene4485	gene932
		GB42021	GB46196	GB46196			gene11744	gene8359				gene1175			gene4488	gene9325
		GB42024	GB41751	GB41751			gene11746	gene8393				gene11755			gene4511	gene9330
		GB42031	GB42295				gene11747	gene8429				gene11756			gene4517	gene938
		GB42031	GB44439				gene11747	gene8455				gene1176			gene4537	gene9382
		GB42031	GB44340				gene1175	gene8472				gene1176			gene4564	gene9404
		GB42032	GB53365				gene11755	gene8557				gene1176			gene4584	gene9409
		GB42038	GB49418				gene11756	gene8559				gene1176			gene4591	gene9412
		GB42039	GB46339				gene1176	gene8605				gene1176			gene4615	gene9419
		GB42039	GB48932				gene1176	gene8636				gene11766			gene463	gene9435
		GB42039	GB50174				gene1176	gene8711				gene11766			gene464	gene9450
		GB42039	GB42940				gene1176	gene8728				gene11779			gene4641	gene9460
		GB42039	GB50965				gene1176	gene8830				gene1178			gene465	gene9466
		GB42039	GB47278				gene11766	gene8888				gene1178			gene4663	gene948
		GB42039	GB49585				gene11766	gene8900				gene11789			gene4667	gene9483
		GB42039	GB44020				gene11779	gene8933				gene11790			gene4669	gene9523
		GB42039	GB54798				gene1178	gene9031				gene11790			gene4675	gene9569
		GB42039	GB48248				gene1178	gene907				gene11790			gene4677	gene9587
		GB42039	GB54143				gene11789	gene9072				gene11790			gene4686	gene9614
		GB42043	GB50699				gene11790	gene9114				gene11793			gene4701	gene964
		GB42043	GB43848				gene11790	gene9177				gene11801			gene4717	gene9694
		GB42043	GB46071				gene11790	gene9204				gene11801			gene474	gene9736
		GB42043	GB55501				gene11790	gene922				gene11801			gene4761	gene9745
		GB42057	GB55789				gene11793	gene9255				gene11804			gene4765	gene9753
		GB42057	GB48973				gene11801	gene9325				gene11804			gene4783	gene9754
		GB42057	GB46479				gene11801	gene9395				gene11812			gene4798	gene9777
		GB42057	GB50381				gene11801	gene9399				gene11812			gene4802	gene9800
		GB42064	GB42143				gene11804	gene9537				gene11821			gene4853	gene9818
		GB42064	GB49519				gene11804	gene964				gene11821			gene4859	gene9825
		GB42076	GB43293				gene11812	gene9659				gene11822			gene4871	gene9831
		GB42076	GB55514				gene11812	gene9736				gene11825			gene4879	gene9852
		GB42085	GB43697				gene11821	gene9800				gene11825			gene490	gene9904
		GB42110	GB47030				gene11821	gene9856				gene11826			gene4933	gene9914
		GB42110	GB53417				gene11822	gene987				gene11835			gene496	gene9972
		GB42139	GB50849				gene11825	gene993				gene11835			gene4966	gene9983
		GB42140	GB55073				gene11825					gene11838			gene4971	gene9985
		GB42141	GB48236				gene11826					gene11839			gene4973	gene9987
		GB42143	GB40794				gene11835					gene1184			gene4989	gene9992
		GB42145	GB50941				gene11835					gene1184			gene4996
		GB42147	GB40441				gene11838					gene1184			gene5020
		GB42150	GB44078				gene11839					gene11847			gene5034
		GB42150	GB43948				gene1184					gene11850			gene5048
		GB42152	GB54313				gene1184					gene11852			gene507
		GB42155	GB40944				gene1184					gene11857			gene5081
		GB42161	GB45526				gene11847					gene11857			gene5103
		GB42167	GB47841				gene11850					gene11887			gene5107
		GB42169	GB45324				gene11852					gene11888			gene5121
		GB42172	GB53506				gene11857					gene11889			gene5129
		GB42175	GB50691				gene11857					gene11892			gene5142
		GB42183	GB51699				gene11887					gene11893			gene5150
		GB42183	GB42761				gene11888					gene11895			gene5156
		GB42184	GB43276				gene11889					gene11897			gene5166
		GB42184	GB41154				gene11892					gene11900			gene5173
		GB42184	GB43567				gene11893					gene11910			gene5227
		GB42188	GB44530				gene11895					gene11915			gene5244
		GB42192	GB54256				gene11897					gene11918			gene5262
		GB42194	GB52659				gene11900					gene11920			gene5286
		GB42195	GB41521				gene11910					gene11920			gene5287
		GB42196	GB49083				gene11915					gene11924			gene529
		GB42196	GB52779				gene11918					gene11933			gene5301
		GB42196	GB50837				gene11920					gene11939			gene5319
		GB42196	GB50690				gene11920					gene11942			gene5337
		GB42196	GB55650				gene11924					gene11942			gene5343
		GB42200	GB53145				gene11933					gene11952			gene5361
		GB42201	GB43301				gene11939					gene11956			gene539
		GB42201	GB52741				gene11942					gene11958			gene5391
		GB42201	GB41423				gene11942					gene11958			gene542
		GB42202	GB44281				gene11952					gene1197			gene5422
		GB42207	GB43937				gene11956					gene11971			gene5451
		GB42216	GB48034				gene11958					gene11982			gene5454
		GB42220	GB40670				gene11958					gene11985			gene5458
		GB42220	GB50806				gene1197					gene11994			gene5459
		GB42220	GB55262				gene11971					gene11994			gene5461
		GB42220	GB42894				gene11982					gene1200			gene5465
		GB42224	GB40730				gene11985					gene1200			gene5473
		GB42233	GB43949				gene11994					gene12005			gene5496
		GB42241	GB45055				gene11994					gene12008			gene550
		GB42241	GB41671				gene1200					gene12016			gene5511
		GB42249	GB42780				gene1200					gene12016			gene5514
		GB42249	GB41773				gene12005					gene12016			gene5534
		GB42249	GB44976				gene12008					gene12016			gene5555
		GB42249	GB42579				gene12016					gene12027			gene5559
		GB42249	GB43160				gene12016					gene12028			gene5565
		GB42249	GB48684				gene12016					gene1203			gene5594
		GB42249	GB40865				gene12016					gene1203			gene561
		GB42249	GB41808				gene12027					gene1203			gene5611
		GB42249	GB46853				gene12028					gene1203			gene5613
		GB42252	GB48059				gene1203					gene1203			gene5614
		GB42260	GB49332				gene1203					gene12030			gene5621
		GB42264	GB50878				gene1203					gene12030			gene569
		GB42266	GB46599				gene1203					gene12041			gene5694
		GB42266	GB50942				gene1203					gene12047			gene5699
		GB42268	GB48199				gene12030					gene12047			gene5704
		GB42271	GB48446				gene12030					gene12049			gene571
		GB42295	GB45811				gene12041					gene1205			gene5716
		GB42297	GB55146				gene12047					gene12055			gene5720
		GB42297	GB45911				gene12047					gene12057			gene5721
		GB42300	GB46655				gene12049					gene12057			gene5726
		GB42312	GB43956				gene1205					gene12059			gene5728
		GB42318	GB44482				gene12055					gene12062			gene5741
		GB42319	GB55855				gene12057					gene12062			gene5743
		GB42323	GB42755				gene12057					gene12063			gene5766
		GB42326	GB51110				gene12059					gene12104			gene578
		GB42332	GB43015				gene12062					gene12104			gene5792
		GB42334	GB48215				gene12062					gene1211			gene5793
		GB42334	GB52340				gene12063					gene12111			gene5807
		GB42334	GB49560				gene12074					gene12118			gene5814
		GB42352	GB46757				gene12074					gene12118			gene582
		GB42354	GB48145				gene12074					gene12120			gene583
		GB42355	GB48019				gene12074					gene12126			gene5857
		GB42356	GB44060				gene12074					gene1213			gene5868
		GB42356	GB53950				gene12104					gene12134			gene5879
		GB42360	GB53657				gene12104					gene12134			gene588
		GB42360	GB46371				gene1211					gene12152			gene5894
		GB42365	GB41011				gene12111					gene12155			gene5907
		GB42374	GB51683				gene12118					gene12157			gene591
		GB42374	GB46597				gene12118					gene12161			gene594
		GB42375	GB50157				gene12120					gene12163			gene5940
		GB42378	GB51744				gene12126					gene12165			gene5957
		GB42379	GB47412				gene1213					gene12167			gene5959
		GB42384	GB43960				gene12134					gene12167			gene5963
		GB42385	GB48690				gene12134					gene12169			gene5968
		GB42401	GB46492				gene12152					gene12169			gene5999
		GB42409	GB51009				gene12155					gene12173			gene6
		GB42411	GB52432				gene12157					gene12173			gene6004
		GB42422	GB43504				gene12161					gene12173			gene6012
		GB42422	GB41287				gene12163					gene12173			gene6054
		GB42422	GB44490				gene12165					gene12173			gene6063
		GB42448	GB51257				gene12167					gene12173			gene6067
		GB42450	GB43379				gene12167					gene12175			gene607
		GB42455	GB52524				gene12169					gene12175			gene6086
		GB42455	GB47142				gene12169					gene12175			gene6087
		GB42455	GB53043				gene12173					gene12193			gene6097
		GB42455	GB41156				gene12173					gene12198			gene6099
		GB42482	GB50160				gene12173					gene12200			gene610
		GB42487	GB42326				gene12173					gene12208			gene6105
		GB42489	GB47413				gene12173					gene12210			gene6112
		GB42494	GB43036				gene12173					gene12210			gene6115
		GB42496	GB45260				gene12175					gene12233			gene6128
		GB42500	GB45263				gene12175					gene12235			gene6149
		GB42501	GB50257				gene12175					gene1224			gene616
		GB42501	GB51100				gene12193					gene1224			gene6162
		GB42508	GB48852				gene12198					gene12248			gene6170
		GB42508	GB55438				gene12200					gene12251			gene6173
		GB42508	GB43245				gene12208					gene12251			gene6176
		GB42508	GB49705				gene12210					gene12251			gene6189
		GB42508	GB49487				gene12210					gene12264			gene6216
		GB42516	GB53318				gene12233					gene12270			gene6219
		GB42526	GB54315				gene12235					gene12271			gene6223
		GB42527	GB54818				gene1224					gene12271			gene6225
		GB42529	GB44936				gene1224					gene12275			gene6227
		GB42534	GB42241				gene12248					gene12310			gene6228
		GB42534	GB50909				gene12251					gene12314			gene6230
		GB42541	GB55698				gene12251					gene12315			gene6237
		GB42543	GB53394				gene12251					gene12315			gene6258
		GB42544	GB45052				gene12264					gene12318			gene6261
		GB42549	GB41608				gene12270					gene1236			gene6265
		GB42559	GB40523				gene12271					gene1250			gene6347
		GB42560	GB48941				gene12271					gene1250			gene6359
		GB42560	GB41075				gene12275					gene1252			gene6364
		GB42577	GB46013				gene12310					gene1261			gene6365
		GB42577	GB51659				gene12314					gene127			gene6366
		GB42579	GB47628				gene12315					gene1274			gene6369
		GB42584	GB46569				gene12315					gene1277			gene6370
		GB42584	GB48962				gene12318					gene1282			gene6379
		GB42592	GB54876				gene1236					gene1291			gene6385
		GB42593	GB49463				gene1250					gene1305			gene6392
		GB42603	GB44336				gene1250					gene1308			gene6395
		GB42604	GB46918				gene1252					gene131			gene6406
		GB42604	GB40565				gene1261					gene1312			gene6410
		GB42604	GB49467				gene127					gene1312			gene6411
		GB42604	GB40765				gene1274					gene1313			gene642
		GB42608	GB44334				gene1277					gene1317			gene6433
		GB42613	GB41994				gene1282					gene1317			gene6478
		GB42634	GB44148				gene1291					gene1317			gene6489
		GB42654	GB45199				gene1305					gene1334			gene6513
		GB42671	GB53989				gene1308					gene1343			gene6519
		GB42674	GB49443				gene131					gene135			gene6550
		GB42685	GB42728				gene1312					gene1354			gene6571
		GB42692	GB46330				gene1312					gene1354			gene658
		GB42692	GB50397				gene1313					gene1356			gene6585
		GB42694	GB49672				gene1317					gene1356			gene6588
		GB42706	GB48790				gene1317					gene1358			gene6599
		GB42714	GB55247				gene1317					gene1358			gene6608
		GB42720	GB51848				gene1334					gene1363			gene663
		GB42728	GB47614				gene1343					gene1363			gene6636
		GB42728	GB52778				gene135					gene1364			gene6638
		GB42728	GB52281				gene1354					gene1367			gene6639
		GB42728	GB42000				gene1354					gene1367			gene6643
		GB42732	GB50890				gene1356					gene1367			gene6657
		GB42732	GB55986				gene1356					gene1369			gene6658
		GB42740	GB41408				gene1358					gene1369			gene668
		GB42746	GB49688				gene1358					gene1370			gene6681
		GB42755	GB42043				gene1363					gene1372			gene6698
		GB42762	GB49233				gene1363					gene1379			gene6717
		GB42770	GB52212				gene1364					gene138			gene6720
		GB42770	GB40054				gene1367					gene138			gene6721
		GB42776	GB43572				gene1367					gene1383			gene6723
		GB42786	GB43195				gene1367					gene1388			gene6747
		GB42808	GB55730				gene1369					gene1390			gene6757
		GB42809	GB44093				gene1369					gene1390			gene6758
		GB42814	GB52427				gene1370					gene1392			gene6760
		GB42817	GB49505				gene1372					gene1392			gene6771
		GB42819	GB48344				gene1379					gene1392			gene6781
		GB42820	GB53012				gene138					gene1392			gene6788
		GB42834	GB47474				gene138					gene1395			gene6792
		GB42835	GB42439				gene1383					gene1398			gene6802
		GB42835	GB40159				gene1388					gene1398			gene6807
		GB42835	GB41700				gene1390					gene1398			gene6810
		GB42836	GB55387				gene1390					gene1400			gene6818
		GB42840	GB41602				gene1392					gene1407			gene6819
		GB42844	GB48748				gene1392					gene1407			gene6830
		GB42846	GB42685				gene1392					gene1408			gene684
		GB42847	GB41845				gene1392					gene141			gene6842
		GB42856	GB53747				gene1395					gene1417			gene6857
		GB42858	GB50048				gene1398					gene1417			gene6866
		GB42862	GB50845				gene1398					gene1418			gene6896
		GB42865	GB50099				gene1398					gene1425			gene6907
		GB42865	GB53809				gene1400					gene1425			gene6915
		GB42866	GB50342				gene1407					gene1436			gene6926
		GB42866	GB47513				gene1407					gene1440			gene6929
		GB42866	GB41376				gene1408					gene1441			gene694
		GB42866	GB51898				gene141					gene1442			gene6940
		GB42866	GB54934				gene1417					gene1455			gene6953
		GB42867	GB51258				gene1417					gene1458			gene6959
		GB42874	GB45640				gene1418					gene146			gene6965
		GB42879	GB44092				gene1425					gene1464			gene6977
		GB42880	GB42671				gene1425					gene1467			gene698
		GB42881	GB55302				gene1436					gene1478			gene6995
		GB42894	GB53782				gene1440					gene148			gene6998
		GB42894	GB43612				gene1441					gene148			gene7004
		GB42894	GB41547				gene1442					gene1480			gene7009
		GB42895	GB52039				gene1455					gene1480			gene7016
		GB42899	GB40906				gene1458					gene149			gene7019
		GB42907	GB43476				gene146					gene1491			gene7033
		GB42917	GB42334				gene1464					gene1492			gene7034
		GB42917	GB45459				gene1467					gene15			gene7042
		GB42921	GB47049				gene1478					gene1503			gene7057
		GB42930	GB43167				gene148					gene1503			gene7058
		GB42933	GB49755				gene148					gene1503			gene7082
		GB42933	GB53468				gene1480					gene1503			gene7085
		GB42940	GB50226				gene1480					gene1503			gene7086
		GB42942	GB44917				gene149					gene1503			gene709
		GB42942	GB47799				gene1491					gene151			gene7093
		GB42942	GB45142				gene1492					gene151			gene710
		GB42942	GB54947				gene15					gene151			gene7116
		GB42942	GB50377				gene1503					gene1511			gene7126
		GB42944	GB52426				gene1503					gene1521			gene7163
		GB42960	GB52604				gene1503					gene1521			gene7165
		GB42969	GB44582				gene1503					gene1534			gene7180
		GB42973	GB54508				gene1503					gene1545			gene7181
		GB42976	GB40703				gene1503					gene1547			gene7198
		GB42976	GB52466				gene151					gene1555			gene7215
		GB42976	GB44330				gene151					gene1556			gene7218
		GB42976	GB46128				gene151					gene1563			gene7235
		GB42984	GB51727				gene1511					gene1564			gene7262
		GB42984	GB55556				gene1521					gene1585			gene7272
		GB42984	GB47584				gene1521					gene1585			gene7277
		GB42984	GB55930				gene1534					gene1586			gene728
		GB42984	GB45795				gene1545					gene1593			gene7280
		GB42984	GB42501				gene1547					gene1593			gene7291
		GB42984	GB52345				gene1555					gene1594			gene7312
		GB42984	GB46076				gene1556					gene1594			gene7330
		GB42985	GB46135				gene1563					gene1614			gene7342
		GB42994	GB44387				gene1564					gene1625			gene735
		GB42997	GB43788				gene1585					gene1630			gene7353
		GB43004	GB50947				gene1585					gene1630			gene7362
		GB43004	GB41681				gene1586					gene1631			gene7369
		GB43004	GB42767				gene1593					gene1631			gene740
		GB43015	GB42593				gene1593					gene1639			gene7404
		GB43015	GB51809				gene1594					gene165			gene7405
		GB43015	GB44634				gene1594					gene1677			gene7415
		GB43016	GB44056				gene1614					gene168			gene7421
		GB43022	GB40426				gene1625					gene1684			gene7443
		GB43034	GB50010				gene1630					gene1692			gene7463
		GB43053	GB52992				gene1630					gene1703			gene747
		GB43054	GB48247				gene1631					gene171			gene7470
		GB43075	GB51849				gene1631					gene1712			gene7473
		GB43077	GB53620				gene1639					gene1722			gene7475
		GB43084	GB53503				gene165					gene1724			gene7542
		GB43088	GB52465				gene1677					gene1724			gene7555
		GB43092	GB51019				gene168					gene1724			gene7558
		GB43105	GB47148				gene1684					gene1724			gene756
		GB43111	GB41867				gene1692					gene1724			gene7609
		GB43111	GB49321				gene1703					gene1724			gene7640
		GB43112	GB45159				gene171					gene1724			gene7645
		GB43114	GB40866				gene1712					gene1726			gene7647
		GB43118	GB54467				gene1722					gene1726			gene7657
		GB43121	GB43168				gene1724					gene1727			gene7661
		GB43122	GB47224				gene1724					gene1729			gene7665
		GB43126	GB44963				gene1724					gene1729			gene7670
		GB43126	GB40525				gene1724					gene173			gene7681
		GB43128	GB43248				gene1724					gene1731			gene7682
		GB43132	GB45758				gene1724					gene1731			gene769
		GB43133	GB46277				gene1724					gene1741			gene7695
		GB43138	GB42997				gene1726					gene1759			gene7696
		GB43138	GB50730				gene1726					gene1759			gene7701
		GB43138	GB44841				gene1727					gene1770			gene7709
		GB43138	GB44276				gene1729					gene1770			gene7725
		GB43138	GB52360				gene1729					gene1778			gene7732
		GB43138	GB55016				gene173					gene1785			gene7737
		GB43143	GB55190				gene1731					gene1798			gene7752
		GB43149	GB45909				gene1731					gene1799			gene7754
		GB43153	GB54219				gene1741					gene1799			gene7756
		GB43155	GB51125				gene1759					gene180			gene7757
		GB43157	GB46774				gene1759					gene1800			gene7759
		GB43160	GB43022				gene1770					gene1811			gene7761
		GB43163	GB47503				gene1770					gene1827			gene7764
		GB43168	GB55515				gene1778					gene1827			gene7767
		GB43172	GB47430				gene1785					gene1827			gene777
		GB43175	GB55004				gene1798					gene1829			gene7780
		GB43180	GB40976				gene1799					gene1830			gene7786
		GB43192	GB47136				gene1799					gene1838			gene7804
		GB43195	GB44988				gene180					gene1842			gene7823
		GB43198	GB44503				gene1800					gene1846			gene784
		GB43200	GB43418				gene1811					gene1855			gene7846
		GB43203	GB46697				gene1827					gene1855			gene7851
		GB43208	GB44207				gene1827					gene1858			gene786
		GB43212	GB50572				gene1827					gene186			gene7865
		GB43217	GB53372				gene1829					gene186			gene7869
		GB43217					gene1830					gene1868			gene7873
		GB43218					gene1838					gene1868			gene7876
		GB43225					gene1842					gene1868			gene7883
		GB43225					gene1846					gene1870			gene7899
		GB43228					gene1855					gene1873			gene7901
		GB43229					gene1855					gene1873			gene7910
		GB43234					gene1858					gene1879			gene7925
		GB43234					gene186					gene1887			gene7934
		GB43236					gene186					gene1887			gene7935
		GB43237					gene1868					gene1896			gene7937
		GB43238					gene1868					gene1901			gene7963
		GB43239					gene1868					gene1905			gene7978
		GB43245					gene1870					gene1907			gene7984
		GB43245					gene1873					gene1914			gene7986
		GB43245					gene1873					gene1914			gene7988
		GB43245					gene1879					gene1914			gene7989
		GB43245					gene1887					gene195			gene7991
		GB43245					gene1887					gene196			gene7999
		GB43246					gene1896					gene1991			gene800
		GB43247					gene1901					gene1995			gene8010
		GB43247					gene1905					gene1998			gene8015
		GB43256					gene1907					gene1999			gene8039
		GB43258					gene1914					gene1999			gene807
		GB43258					gene1914					gene1999			gene8070
		GB43276					gene1914					gene1999			gene8071
		GB43276					gene195					gene1999			gene8084
		GB43276					gene196					gene2			gene8095
		GB43280					gene1991					gene2007			gene8109
		GB43293					gene1995					gene2013			gene811
		GB43293					gene1998					gene2014			gene8131
		GB43293					gene1999					gene2015			gene8140
		GB43293					gene1999					gene2017			gene8152
		GB43295					gene1999					gene2017			gene8153
		GB43300					gene1999					gene2017			gene8162
		GB43300					gene1999					gene2017			gene8166
		GB43300					gene2					gene2018			gene8181
		GB43301					gene2007					gene2019			gene8184
		GB43301					gene2013					gene203			gene8187
		GB43302					gene2014					gene2053			gene8197
		GB43302					gene2015					gene2061			gene8202
		GB43302					gene2017					gene2064			gene8209
		GB43302					gene2017					gene2067			gene8210
		GB43304					gene2017					gene2084			gene8211
		GB43305					gene2017					gene2086			gene822
		GB43338					gene2018					gene2096			gene8222
		GB43338					gene2019					gene2099			gene8223
		GB43365					gene203					gene210			gene8224
		GB43366					gene2053					gene2105			gene823
		GB43375					gene2061					gene2111			gene8234
		GB43375					gene2064					gene2112			gene8245
		GB43375					gene2067					gene2112			gene8256
		GB43379					gene2084					gene2112			gene8258
		GB43418					gene2086					gene212			gene8259
		GB43421					gene2096					gene2131			gene8261
		GB43422					gene2099					gene2132			gene8274
		GB43422					gene210					gene2132			gene8285
		GB43429					gene2105					gene2132			gene8286
		GB43434					gene2111					gene2135			gene8302
		GB43444					gene2112					gene2135			gene8328
		GB43446					gene2112					gene2137			gene833
		GB43446					gene2112					gene2144			gene8338
		GB43448					gene212					gene2144			gene8339
		GB43448					gene2131					gene2144			gene8359
		GB43456					gene2132					gene2147			gene8393
		GB43456					gene2132					gene2147			gene8415
		GB43459					gene2132					gene2147			gene8425
		GB43459					gene2135					gene2147			gene8426
		GB43459					gene2135					gene2150			gene8429
		GB43459					gene2137					gene2150			gene8458
		GB43459					gene2144					gene2150			gene8459
		GB43459					gene2144					gene2158			gene8461
		GB43459					gene2144					gene2160			gene8498
		GB43462					gene2147					gene2162			gene8503
		GB43467					gene2147					gene2162			gene8514
		GB43476					gene2147					gene2162			gene8522
		GB43486					gene2147					gene2169			gene8523
		GB43486					gene2150					gene2170			gene8534
		GB43495					gene2150					gene2170			gene8539
		GB43504					gene2150					gene2174			gene8541
		GB43507					gene2158					gene2175			gene8549
		GB43543					gene2160					gene2187			gene8571
		GB43548					gene2162					gene2193			gene8577
		GB43551					gene2162					gene2195			gene858
		GB43551					gene2162					gene2195			gene8597
		GB43553					gene2169					gene2196			gene8618
		GB43559					gene2170					gene2197			gene8675
		GB43575					gene2170					gene2208			gene8678
		GB43591					gene2174					gene2211			gene8685
		GB43606					gene2175					gene2211			gene8697
		GB43613					gene2187					gene2211			gene8706
		GB43613					gene2193					gene2211			gene8731
		GB43617					gene2195					gene2211			gene8761
		GB43618					gene2195					gene2215			gene8782
		GB43618					gene2196					gene2215			gene8784
		GB43618					gene2197					gene2225			gene8790
		GB43631					gene2208					gene2226			gene8803
		GB43635					gene2211					gene2226			gene8813
		GB43643					gene2211					gene2226			gene8816
		GB43643					gene2211					gene2226			gene8835
		GB43643					gene2211					gene2226			gene8853
		GB43657					gene2211					gene2226			gene8858
		GB43684					gene2215					gene2227			gene887
		GB43692					gene2215					gene2237			gene8873
		GB43704					gene2225					gene2248			gene8888
		GB43706					gene2226					gene2251			gene8897
		GB43707					gene2226					gene2255			gene8900
		GB43712					gene2226					gene2258			gene8906
		GB43716					gene2226					gene2266			gene8933
		GB43727					gene2226					gene2269			gene8936
		GB43727					gene2226					gene227			gene8940
		GB43727					gene2227					gene2271			gene895
		GB43733					gene2237					gene2271			gene8954
		GB43742					gene2248					gene2271			gene8968
		GB43742					gene2251					gene2271			gene898
		GB43778					gene2255					gene2274			gene8991
		GB43782					gene2258					gene2274			gene9016
		GB43816					gene2266					gene2275			gene9031
		GB43820					gene2269					gene2276			gene9049
		GB43820					gene227					gene2277			gene9053
		GB43820					gene2271					gene2283			gene9064
		GB43820					gene2271					gene2284			gene9067
		GB43820					gene2271					gene2287			gene9070
		GB43820					gene2271					gene2291			gene9072
		GB43825					gene2274					gene2291			gene9076
		GB43839					gene2274					gene2291			gene9078
		GB43839					gene2275					gene2291			gene9089
		GB43840					gene2276					gene2291			gene9090
		GB43848					gene2277					gene2291			gene9114
		GB43851					gene2283					gene2295			gene9118
		GB43855					gene2284					gene2303			gene913
		GB43856					gene2287					gene2311			gene9155
		GB43858					gene2291					gene2318			gene9161
		GB43868					gene2291					gene2322			gene9167
		GB43871					gene2291					gene2333			gene9177
		GB43873					gene2291					gene2346			gene9186
		GB43874					gene2291					gene2347			gene9199
		GB43874					gene2291					gene2348			gene920
		GB43882					gene2295					gene2352			gene9201
		GB43883					gene2303					gene2358			gene9202
		GB43894					gene2311					gene2358			gene9204
		GB43906					gene2318					gene2358			gene9209
		GB43908					gene2322					gene2360			gene9236
		GB43909					gene2333					gene2360			gene9249
		GB43909					gene2346					gene2363			gene9255
		GB43917					gene2347					gene2365			gene9257
		GB43920					gene2348					gene2376			gene9260
		GB43921					gene2352					gene2376			gene9276
		GB43937					gene2358					gene2382			gene9287
		GB43938					gene2358					gene2383			gene9294
		GB43951					gene2358					gene2384			gene9299
		GB43963					gene2360					gene2386			gene9301
		GB43978					gene2360					gene2387			gene9304
		GB43980					gene2363					gene2388			gene9306
		GB43980					gene2365					gene2388			gene9312
		GB43989					gene2376					gene2388			gene9315
		GB44000					gene2376					gene2388			gene9316
		GB44002					gene2382					gene2389			gene932
		GB44019					gene2383					gene2390			gene9325
		GB44020					gene2384					gene2390			gene9330
		GB44020					gene2386					gene2391			gene9335
		GB44030					gene2387					gene2392			gene9336
		GB44032					gene2388					gene2399			gene9364
		GB44032					gene2388					gene240			gene938
		GB44039					gene2388					gene2403			gene9382
		GB44049					gene2388					gene2403			gene940
		GB44056					gene2389					gene2426			gene9404
		GB44056					gene2390					gene2427			gene9409
		GB44058					gene2390					gene2428			gene9412
		GB44058					gene2391					gene2428			gene9419
		GB44058					gene2392					gene2429			gene943
		GB44059					gene2399					gene243			gene9435
		GB44061					gene240					gene2432			gene9448
		GB44064					gene2403					gene2433			gene9450
		GB44079					gene2403					gene2436			gene9460
		GB44080					gene2426					gene2436			gene9466
		GB44083					gene2427					gene2436			gene948
		GB44091					gene2428					gene2436			gene9483
		GB44091					gene2428					gene2436			gene9488
		GB44091					gene2429					gene2436			gene9492
		GB44091					gene243					gene2438			gene9508
		GB44091					gene2432					gene2438			gene9513
		GB44101					gene2433					gene2443			gene9519
		GB44101					gene2436					gene2448			gene9523
		GB44104					gene2436					gene2453			gene953
		GB44113					gene2436					gene2453			gene9541
		GB44119					gene2436					gene2466			gene9569
		GB44119					gene2436					gene2466			gene9587
		GB44119					gene2436					gene2475			gene9614
		GB44120					gene2438					gene2477			gene964
		GB44120					gene2438					gene2499			gene9641
		GB44120					gene2443					gene2501			gene9659
		GB44122					gene2448					gene2523			gene9662
		GB44127					gene2453					gene2543			gene9694
		GB44127					gene2453					gene2543			gene9698
		GB44129					gene2466					gene2548			gene9736
		GB44129					gene2466					gene2552			gene9742
		GB44135					gene2475					gene2598			gene9745
		GB44136					gene2477					gene2611			gene9746
		GB44140					gene2499					gene2612			gene9753
		GB44141					gene2501					gene2622			gene9754
		GB44141					gene2523					gene2624			gene977
		GB44146					gene2543					gene2627			gene9777
		GB44148					gene2543					gene2627			gene9787
		GB44148					gene2548					gene2628			gene9793
		GB44148					gene2552					gene2631			gene9800
		GB44152					gene2598					gene2631			gene9812
		GB44152					gene2611					gene2634			gene9817
		GB44159					gene2612					gene2634			gene9818
		GB44159					gene2622					gene2641			gene9821
		GB44159					gene2624					gene2647			gene9823
		GB44159					gene2627					gene2648			gene9825
		GB44159					gene2627					gene2648			gene9831
		GB44160					gene2628					gene2677			gene9852
		GB44163					gene2631					gene2691			gene9855
		GB44174					gene2631					gene2693			gene9869
		GB44174					gene2634					gene2694			gene9882
		GB44174					gene2634					gene2694			gene989
		GB44175					gene2641					gene2695			gene9904
		GB44175					gene2647					gene2699			gene9914
		GB44175					gene2648					gene2699			gene992
		GB44180					gene2648					gene27			gene995
		GB44183					gene2677					gene2702			gene9970
		GB44186					gene2691					gene2705			gene9972
		GB44187					gene2693					gene272			gene9982
		GB44192					gene2694					gene2723			gene9983
		GB44197					gene2694					gene2723			gene9985
		GB44197					gene2695					gene2723			gene9987
		GB44197					gene2699					gene2728			gene9992
		GB44198					gene2699					gene2746
		GB44207					gene27					gene2752
		GB44207					gene2702					gene2756
		GB44220					gene2705					gene2757
		GB44220					gene272					gene2757
		GB44220					gene2723					gene2759
		GB44220					gene2723					gene2762
		GB44220					gene2723					gene2763
		GB44223					gene2728					gene2765
		GB44225					gene2746					gene2774
		GB44225					gene2752					gene2774
		GB44237					gene2756					gene2774
		GB44252					gene2757					gene2777
		GB44252					gene2757					gene2778
		GB44252					gene2759					gene2781
		GB44252					gene2762					gene2795
		GB44254					gene2763					gene2798
		GB44254					gene2765					gene28
		GB44254					gene2774					gene28
		GB44259					gene2774					gene28
		GB44259					gene2774					gene2800
		GB44276					gene2777					gene283
		GB44276					gene2778					gene283
		GB44276					gene2781					gene2831
		GB44276					gene2795					gene2834
		GB44281					gene2798					gene2834
		GB44283					gene28					gene2834
		GB44289					gene28					gene2834
		GB44291					gene28					gene2837
		GB44291					gene2800					gene2839
		GB44293					gene283					gene2845
		GB44295					gene283					gene2845
		GB44295					gene2831					gene2849
		GB44296					gene2834					gene2853
		GB44297					gene2834					gene2853
		GB44297					gene2834					gene2853
		GB44299					gene2834					gene2877
		GB44299					gene2837					gene2883
		GB44300					gene2839					gene2891
		GB44303					gene2845					gene2892
		GB44305					gene2845					gene2897
		GB44315					gene2849					gene2898
		GB44315					gene2853					gene2898
		GB44316					gene2853					gene2901
		GB44327					gene2853					gene2901
		GB44328					gene2877					gene2904
		GB44328					gene2883					gene2909
		GB44328					gene2891					gene2909
		GB44330					gene2892					gene2910
		GB44330					gene2897					gene2922
		GB44330					gene2898					gene2922
		GB44331					gene2898					gene2922
		GB44331					gene2901					gene2922
		GB44336					gene2901					gene2930
		GB44336					gene2904					gene2933
		GB44336					gene2909					gene2933
		GB44336					gene2909					gene2935
		GB44347					gene2910					gene2941
		GB44350					gene2922					gene2942
		GB44351					gene2922					gene2987
		GB44361					gene2922					gene2989
		GB44373					gene2922					gene2992
		GB44387					gene2930					gene2995
		GB44396					gene2933					gene2998
		GB44396					gene2933					gene3
		GB44396					gene2935					gene3000
		GB44400					gene2941					gene3014
		GB44412					gene2942					gene3014
		GB44418					gene2987					gene3016
		GB44418					gene2989					gene3024
		GB44420					gene2992					gene3027
		GB44422					gene2995					gene3034
		GB44423					gene2998					gene3041
		GB44424					gene3					gene3050
		GB44428					gene3000					gene3050
		GB44431					gene3014					gene3052
		GB44433					gene3014					gene3052
		GB44433					gene3016					gene3052
		GB44436					gene3024					gene3053
		GB44439					gene3027					gene3053
		GB44445					gene3034					gene3057
		GB44462					gene3041					gene3058
		GB44482					gene3050					gene3058
		GB44482					gene3050					gene3058
		GB44482					gene3052					gene3058
		GB44482					gene3052					gene3060
		GB44482					gene3052					gene3061
		GB44483					gene3053					gene3061
		GB44483					gene3053					gene3062
		GB44485					gene3057					gene3062
		GB44485					gene3058					gene3068
		GB44485					gene3058					gene3077
		GB44485					gene3058					gene3094
		GB44486					gene3058					gene31
		GB44490					gene3060					gene31
		GB44490					gene3061					gene3104
		GB44496					gene3061					gene3113
		GB44496					gene3062					gene3113
		GB44515					gene3062					gene3113
		GB44523					gene3068					gene3113
		GB44523					gene3077					gene3113
		GB44523					gene3094					gene3115
		GB44528					gene31					gene3124
		GB44528					gene31					gene3129
		GB44532					gene3104					gene3131
		GB44532					gene3113					gene3140
		GB44532					gene3113					gene3156
		GB44532					gene3113					gene3156
		GB44534					gene3113					gene3165
		GB44535					gene3113					gene3179
		GB44544					gene3115					gene318
		GB44548					gene3124					gene318
		GB44549					gene3129					gene3184
		GB44549					gene3131					gene3200
		GB44549					gene3140					gene3201
		GB44551					gene3156					gene3201
		GB44551					gene3156					gene3201
		GB44560					gene3165					gene3201
		GB44564					gene3179					gene3201
		GB44567					gene318					gene3201
		GB44567					gene318					gene3201
		GB44573					gene3184					gene3201
		GB44573					gene3200					gene3201
		GB44575					gene3201					gene3201
		GB44579					gene3201					gene3202
		GB44581					gene3201					gene3202
		GB44583					gene3201					gene3205
		GB44585					gene3201					gene3213
		GB44588					gene3201					gene3217
		GB44588					gene3201					gene3218
		GB44590					gene3201					gene3218
		GB44592					gene3201					gene3218
		GB44594					gene3201					gene3226
		GB44596					gene3202					gene3229
		GB44634					gene3202					gene323
		GB44634					gene3205					gene323
		GB44634					gene3213					gene3236
		GB44636					gene3217					gene3240
		GB44636					gene3218					gene3247
		GB44642					gene3218					gene3253
		GB44642					gene3218					gene3253
		GB44648					gene3226					gene327
		GB44648					gene3229					gene3271
		GB44648					gene323					gene3271
		GB44648					gene323					gene328
		GB44651					gene3236					gene328
		GB44651					gene3240					gene328
		GB44653					gene3247					gene328
		GB44658					gene3253					gene3280
		GB44661					gene3253					gene3284
		GB44661					gene327					gene3294
		GB44663					gene3271					gene3294
		GB44678					gene3271					gene3294
		GB44685					gene328					gene3294
		GB44690					gene328					gene3294
		GB44718					gene328					gene3297
		GB44723					gene328					gene3299
		GB44726					gene3280					gene3301
		GB44726					gene3284					gene3302
		GB44726					gene3294					gene3339
		GB44726					gene3294					gene3343
		GB44731					gene3294					gene3345
		GB44732					gene3294					gene3345
		GB44749					gene3294					gene3348
		GB44755					gene3297					gene3354
		GB44756					gene3299					gene3358
		GB44761					gene3301					gene3358
		GB44770					gene3302					gene3377
		GB44773					gene3339					gene3377
		GB44779					gene3343					gene339
		GB44786					gene3345					gene3415
		GB44789					gene3345					gene3416
		GB44791					gene3348					gene342
		GB44792					gene3354					gene3420
		GB44802					gene3358					gene3420
		GB44802					gene3358					gene3429
		GB44824					gene3377					gene3439
		GB44829					gene3377					gene3442
		GB44832					gene339					gene3443
		GB44832					gene3415					gene3445
		GB44841					gene3416					gene3448
		GB44842					gene342					gene3452
		GB44850					gene3420					gene3452
		GB44865					gene3420					gene3452
		GB44869					gene3429					gene3452
		GB44873					gene3439					gene3456
		GB44876					gene3442					gene3462
		GB44886					gene3443					gene3463
		GB44888					gene3445					gene3463
		GB44890					gene3448					gene3466
		GB44899					gene3452					gene347
		GB44900					gene3452					gene3482
		GB44905					gene3452					gene3488
		GB44906					gene3452					gene3493
		GB44907					gene3456					gene3501
		GB44909					gene3462					gene3507
		GB44913					gene3463					gene3508
		GB44913					gene3463					gene3508
		GB44917					gene3466					gene3509
		GB44917					gene347					gene3524
		GB44917					gene3482					gene3524
		GB44918					gene3488					gene3527
		GB44927					gene3493					gene3562
		GB44934					gene3501					gene3562
		GB44935					gene3507					gene357
		GB44936					gene3508					gene357
		GB44938					gene3508					gene3573
		GB44939					gene3509					gene3602
		GB44939					gene3524					gene3602
		GB44943					gene3524					gene3603
		GB44959					gene3527					gene3606
		GB44960					gene3562					gene3612
		GB44960					gene3562					gene3616
		GB44961					gene357					gene3622
		GB44966					gene357					gene3622
		GB44967					gene3573					gene3671
		GB44968					gene3602					gene3678
		GB44968					gene3602					gene3680
		GB44968					gene3603					gene3681
		GB44969					gene3606					gene3681
		GB44972					gene3612					gene3681
		GB44972					gene3616					gene3685
		GB44972					gene3622					gene3685
		GB44973					gene3622					gene3685
		GB44974					gene3671					gene3685
		GB44974					gene3678					gene3685
		GB44976					gene3680					gene3687
		GB44983					gene3681					gene3694
		GB44988					gene3681					gene37
		GB44988					gene3681					gene3701
		GB44988					gene3685					gene3722
		GB44994					gene3685					gene3722
		GB44996					gene3685					gene3732
		GB45001					gene3685					gene3732
		GB45005					gene3685					gene3737
		GB45008					gene3687					gene3738
		GB45009					gene3694					gene3738
		GB45017					gene37					gene3738
		GB45020					gene3701					gene3744
		GB45024					gene3722					gene3757
		GB45029					gene3722					gene3759
		GB45035					gene3732					gene376
		GB45035					gene3732					gene376
		GB45036					gene3737					gene376
		GB45037					gene3738					gene3762
		GB45044					gene3738					gene3763
		GB45045					gene3738					gene3765
		GB45050					gene3744					gene3769
		GB45051					gene3757					gene3769
		GB45052					gene3759					gene3769
		GB45052					gene376					gene3772
		GB45052					gene376					gene3772
		GB45055					gene376					gene3772
		GB45055					gene3762					gene3785
		GB45055					gene3763					gene3795
		GB45055					gene3765					gene3795
		GB45055					gene3769					gene3795
		GB45055					gene3769					gene3796
		GB45062					gene3769					gene3797
		GB45063					gene3772					gene3798
		GB45070					gene3772					gene3798
		GB45074					gene3772					gene3798
		GB45075					gene3785					gene3798
		GB45075					gene3795					gene3798
		GB45086					gene3795					gene3799
		GB45094					gene3795					gene3803
		GB45096					gene3796					gene3807
		GB45098					gene3797					gene3807
		GB45101					gene3798					gene381
		GB45101					gene3798					gene3810
		GB45101					gene3798					gene3810
		GB45119					gene3798					gene3810
		GB45128					gene3798					gene3814
		GB45137					gene3799					gene3825
		GB45137					gene3803					gene3825
		GB45139					gene3807					gene3827
		GB45139					gene3807					gene3832
		GB45139					gene381					gene3847
		GB45140					gene3810					gene3847
		GB45141					gene3810					gene3848
		GB45141					gene3810					gene3856
		GB45142					gene3814					gene3859
		GB45142					gene3825					gene3861
		GB45142					gene3825					gene3861
		GB45142					gene3827					gene3861
		GB45142					gene3832					gene3863
		GB45142					gene3847					gene3863
		GB45142					gene3847					gene3863
		GB45145					gene3848					gene3863
		GB45147					gene3856					gene3863
		GB45150					gene3859					gene3864
		GB45150					gene3861					gene3864
		GB45150					gene3861					gene3864
		GB45156					gene3861					gene3876
		GB45157					gene3863					gene3887
		GB45157					gene3863					gene389
		GB45159					gene3863					gene3893
		GB45159					gene3863					gene3893
		GB45174					gene3863					gene3897
		GB45183					gene3864					gene3898
		GB45184					gene3864					gene3898
		GB45185					gene3864					gene3899
		GB45193					gene3876					gene3903
		GB45195					gene3887					gene3907
		GB45197					gene389					gene3907
		GB45197					gene3893					gene3919
		GB45197					gene3893					gene3919
		GB45199					gene3897					gene3919
		GB45207					gene3898					gene3924
		GB45212					gene3898					gene3924
		GB45215					gene3899					gene3930
		GB45216					gene3903					gene3930
		GB45221					gene3907					gene3937
		GB45225					gene3907					gene3941
		GB45225					gene3919					gene3941
		GB45235					gene3919					gene3948
		GB45235					gene3919					gene395
		GB45248					gene3924					gene395
		GB45248					gene3924					gene3950
		GB45250					gene3930					gene3951
		GB45256					gene3930					gene3951
		GB45257					gene3937					gene3951
		GB45258					gene3941					gene3951
		GB45259					gene3941					gene3951
		GB45260					gene3948					gene3951
		GB45263					gene395					gene3951
		GB45265					gene395					gene3951
		GB45265					gene3950					gene3951
		GB45270					gene3951					gene3951
		GB45277					gene3951					gene3959
		GB45285					gene3951					gene3959
		GB45286					gene3951					gene3959
		GB45286					gene3951					gene3959
		GB45287					gene3951					gene396
		GB45292					gene3951					gene3969
		GB45292					gene3951					gene3979
		GB45297					gene3951					gene3982
		GB45303					gene3951					gene3986
		GB45324					gene3959					gene3986
		GB45345					gene3959					gene3986
		GB45348					gene3959					gene3991
		GB45348					gene3959					gene3994
		GB45348					gene396					gene4005
		GB45348					gene3969					gene4010
		GB45348					gene3979					gene4010
		GB45350					gene3982					gene4014
		GB45354					gene3986					gene4014
		GB45356					gene3986					gene4016
		GB45364					gene3986					gene4020
		GB45368					gene3991					gene4023
		GB45372					gene3994					gene4033
		GB45373					gene4005					gene4040
		GB45374					gene4010					gene4040
		GB45375					gene4010					gene4040
		GB45377					gene4014					gene4041
		GB45382					gene4014					gene4058
		GB45388					gene4016					gene4058
		GB45399					gene4020					gene4059
		GB45413					gene4023					gene4059
		GB45415					gene4033					gene4059
		GB45415					gene4040					gene406
		GB45433					gene4040					gene4070
		GB45435					gene4040					gene4076
		GB45437					gene4041					gene4077
		GB45458					gene4058					gene4077
		GB45459					gene4058					gene4077
		GB45459					gene4059					gene4079
		GB45459					gene4059					gene4082
		GB45459					gene4059					gene4098
		GB45463					gene406					gene4098
		GB45474					gene4070					gene41
		GB45474					gene4076					gene4100
		GB45474					gene4077					gene4116
		GB45487					gene4077					gene4121
		GB45487					gene4077					gene4121
		GB45497					gene4079					gene4121
		GB45497					gene4082					gene4122
		GB45497					gene4098					gene4127
		GB45498					gene4098					gene4127
		GB45501					gene41					gene4127
		GB45503					gene4100					gene4131
		GB45503					gene4116					gene4131
		GB45517					gene4121					gene4131
		GB45518					gene4121					gene4131
		GB45518					gene4121					gene4134
		GB45518					gene4122					gene4136
		GB45518					gene4127					gene414
		GB45518					gene4127					gene415
		GB45526					gene4127					gene4164
		GB45528					gene4131					gene4169
		GB45528					gene4131					gene4169
		GB45532					gene4131					gene4176
		GB45534					gene4131					gene4178
		GB45537					gene4134					gene4180
		GB45547					gene4136					gene4189
		GB45547					gene414					gene4189
		GB45548					gene415					gene4192
		GB45548					gene4164					gene4199
		GB45564					gene4169					gene4206
		GB45564					gene4169					gene4206
		GB45567					gene4176					gene4212
		GB45569					gene4178					gene4212
		GB45582					gene4180					gene4214
		GB45583					gene4189					gene4214
		GB45597					gene4189					gene4239
		GB45617					gene4192					gene4240
		GB45623					gene4199					gene4241
		GB45623					gene4206					gene4241
		GB45624					gene4206					gene4241
		GB45625					gene4212					gene4241
		GB45625					gene4212					gene4244
		GB45625					gene4214					gene4244
		GB45633					gene4214					gene4249
		GB45637					gene4239					gene4249
		GB45637					gene4240					gene4249
		GB45640					gene4241					gene4249
		GB45640					gene4241					gene426
		GB45654					gene4241					gene4260
		GB45654					gene4241					gene4260
		GB45657					gene4244					gene4260
		GB45664					gene4244					gene4260
		GB45678					gene4249					gene4260
		GB45685					gene4249					gene4260
		GB45685					gene4249					gene4260
		GB45686					gene4249					gene4260
		GB45688					gene426					gene4260
		GB45688					gene4260					gene4260
		GB45688					gene4260					gene4260
		GB45689					gene4260					gene4267
		GB45689					gene4260					gene4272
		GB45690					gene4260					gene4272
		GB45698					gene4260					gene4277
		GB45716					gene4260					gene4279
		GB45730					gene4260					gene4279
		GB45732					gene4260					gene4279
		GB45741					gene4260					gene4290
		GB45743					gene4260					gene4295
		GB45758					gene4267					gene4295
		GB45758					gene4272					gene4295
		GB45761					gene4272					gene430
		GB45774					gene4277					gene4304
		GB45774					gene4279					gene4327
		GB45774					gene4279					gene4328
		GB45774					gene4279					gene4328
		GB45795					gene4290					gene4335
		GB45795					gene4295					gene434
		GB45811					gene4295					gene4345
		GB45811					gene4295					gene4347
		GB45819					gene430					gene4348
		GB45823					gene4304					gene4351
		GB45829					gene4327					gene4351
		GB45831					gene4328					gene4351
		GB45850					gene4328					gene4357
		GB45852					gene4335					gene436
		GB45852					gene434					gene4360
		GB45854					gene4345					gene4363
		GB45864					gene4347					gene437
		GB45864					gene4348					gene4373
		GB45867					gene4351					gene4373
		GB45871					gene4351					gene4380
		GB45873					gene4351					gene4384
		GB45878					gene4357					gene4384
		GB45881					gene436					gene4395
		GB45883					gene4360					gene440
		GB45884					gene4363					gene4408
		GB45905					gene437					gene4408
		GB45907					gene4373					gene4412
		GB45913					gene4373					gene4416
		GB45923					gene4380					gene4417
		GB45924					gene4384					gene4419
		GB45932					gene4384					gene442
		GB45934					gene4395					gene4421
		GB45935					gene440					gene4430
		GB45937					gene4408					gene4432
		GB45937					gene4408					gene4435
		GB45937					gene4412					gene4435
		GB45943					gene4416					gene4441
		GB45943					gene4417					gene4444
		GB45944					gene4419					gene4447
		GB45951					gene442					gene445
		GB45968					gene4421					gene445
		GB45970					gene4430					gene4459
		GB45970					gene4432					gene4463
		GB45970					gene4435					gene4473
		GB45973					gene4435					gene4473
		GB46006					gene4441					gene4478
		GB46013					gene4444					gene4485
		GB46013					gene4447					gene4486
		GB46017					gene445					gene4488
		GB46035					gene445					gene4488
		GB46035					gene4459					gene4495
		GB46035					gene4463					gene4495
		GB46035					gene4473					gene4495
		GB46039					gene4473					gene4495
		GB46050					gene4478					gene4511
		GB46052					gene4485					gene4511
		GB46061					gene4486					gene4512
		GB46066					gene4488					gene4512
		GB46069					gene4488					gene4512
		GB46070					gene4495					gene4512
		GB46071					gene4495					gene4512
		GB46091					gene4495					gene4515
		GB46091					gene4495					gene4515
		GB46091					gene4511					gene4515
		GB46091					gene4511					gene4517
		GB46091					gene4512					gene4517
		GB46102					gene4512					gene4517
		GB46112					gene4512					gene4517
		GB46113					gene4512					gene4518
		GB46118					gene4512					gene4537
		GB46119					gene4515					gene4537
		GB46129					gene4515					gene4564
		GB46129					gene4515					gene4571
		GB46131					gene4517					gene4575
		GB46144					gene4517					gene4576
		GB46145					gene4517					gene4578
		GB46145					gene4517					gene4578
		GB46145					gene4518					gene4578
		GB46145					gene4537					gene4584
		GB46145					gene4537					gene4587
		GB46145					gene4564					gene4587
		GB46145					gene4571					gene4587
		GB46145					gene4575					gene4587
		GB46145					gene4576					gene4591
		GB46145					gene4578					gene4592
		GB46146					gene4578					gene4594
		GB46146					gene4578					gene4596
		GB46147					gene4584					gene4603
		GB46169					gene4587					gene4603
		GB46188					gene4587					gene4615
		GB46209					gene4587					gene4619
		GB46211					gene4587					gene4619
		GB46211					gene4591					gene4622
		GB46212					gene4592					gene463
		GB46212					gene4594					gene463
		GB46214					gene4596					gene463
		GB46217					gene4603					gene463
		GB46218					gene4603					gene4638
		GB46231					gene4615					gene4638
		GB46240					gene4619					gene464
		GB46243					gene4619					gene4641
		GB46245					gene4622					gene4641
		GB46247					gene463					gene4642
		GB46251					gene463					gene4642
		GB46255					gene463					gene465
		GB46263					gene463					gene465
		GB46266					gene4638					gene4650
		GB46266					gene4638					gene4652
		GB46268					gene464					gene4663
		GB46268					gene4641					gene4664
		GB46271					gene4641					gene4667
		GB46271					gene4642					gene4668
		GB46273					gene4642					gene4669
		GB46274					gene465					gene4675
		GB46274					gene465					gene4677
		GB46274					gene4650					gene4677
		GB46277					gene4652					gene4677
		GB46277					gene4663					gene4682
		GB46291					gene4664					gene4683
		GB46296					gene4667					gene4686
		GB46314					gene4668					gene4686
		GB46321					gene4669					gene4701
		GB46321					gene4675					gene4710
		GB46322					gene4677					gene4717
		GB46322					gene4677					gene4719
		GB46330					gene4677					gene473
		GB46330					gene4682					gene4733
		GB46330					gene4683					gene474
		GB46330					gene4686					gene4759
		GB46333					gene4686					gene4761
		GB46339					gene4701					gene4765
		GB46339					gene4710					gene4765
		GB46339					gene4717					gene4766
		GB46345					gene4719					gene4780
		GB46360					gene473					gene4783
		GB46362					gene4733					gene4798
		GB46362					gene474					gene4802
		GB46363					gene4759					gene4802
		GB46363					gene4761					gene4823
		GB46363					gene4765					gene4823
		GB46371					gene4765					gene4837
		GB46371					gene4766					gene4847
		GB46373					gene4780					gene4849
		GB46376					gene4783					gene4849
		GB46377					gene4798					gene4850
		GB46395					gene4802					gene4853
		GB46419					gene4802					gene4853
		GB46419					gene4823					gene4859
		GB46420					gene4823					gene4862
		GB46420					gene4837					gene4866
		GB46423					gene4847					gene4866
		GB46425					gene4849					gene4866
		GB46429					gene4849					gene4866
		GB46429					gene4850					gene4871
		GB46431					gene4853					gene4879
		GB46436					gene4853					gene4879
		GB46437					gene4859					gene4894
		GB46448					gene4862					gene4894
		GB46452					gene4866					gene490
		GB46457					gene4866					gene4908
		GB46478					gene4866					gene4908
		GB46479					gene4866					gene4908
		GB46479					gene4871					gene4908
		GB46487					gene4879					gene4911
		GB46487					gene4879					gene4916
		GB46490					gene4894					gene4924
		GB46492					gene4894					gene4925
		GB46494					gene490					gene4925
		GB46496					gene4908					gene4933
		GB46509					gene4908					gene496
		GB46511					gene4908					gene4961
		GB46512					gene4908					gene4966
		GB46520					gene4911					gene4971
		GB46521					gene4916					gene4973
		GB46521					gene4924					gene4989
		GB46526					gene4925					gene4992
		GB46526					gene4925					gene4996
		GB46533					gene4933					gene4996
		GB46533					gene496					gene4999
		GB46539					gene4961					gene4999
		GB46541					gene4966					gene5
		GB46541					gene4971					gene5013
		GB46541					gene4973					gene5016
		GB46564					gene4989					gene5016
		GB46564					gene4992					gene5020
		GB46564					gene4996					gene5020
		GB46564					gene4996					gene5034
		GB46564					gene4999					gene5045
		GB46567					gene4999					gene5047
		GB46569					gene5					gene5048
		GB46569					gene5013					gene5061
		GB46569					gene5016					gene5061
		GB46581					gene5016					gene5061
		GB46582					gene5020					gene5061
		GB46583					gene5020					gene5061
		GB46583					gene5034					gene507
		GB46583					gene5045					gene507
		GB46583					gene5047					gene507
		GB46586					gene5048					gene5073
		GB46586					gene5061					gene5074
		GB46589					gene5061					gene508
		GB46599					gene5061					gene508
		GB46605					gene5061					gene5081
		GB46606					gene5061					gene5103
		GB46610					gene507					gene5107
		GB46614					gene507					gene5107
		GB46616					gene507					gene5114
		GB46617					gene5073					gene5116
		GB46618					gene5074					gene5119
		GB46618					gene508					gene5119
		GB46627					gene508					gene5121
		GB46630					gene5081					gene5129
		GB46636					gene5103					gene5142
		GB46642					gene5107					gene5142
		GB46645					gene5107					gene5150
		GB46684					gene5114					gene5150
		GB46684					gene5116					gene5151
		GB46689					gene5119					gene5151
		GB46691					gene5119					gene5156
		GB46695					gene5121					gene5158
		GB46697					gene5129					gene5166
		GB46697					gene5142					gene5173
		GB46705					gene5142					gene5175
		GB46713					gene5150					gene5175
		GB46713					gene5150					gene5202
		GB46720					gene5151					gene5209
		GB46720					gene5151					gene5212
		GB46735					gene5156					gene5227
		GB46736					gene5158					gene5230
		GB46736					gene5166					gene5236
		GB46736					gene5173					gene5237
		GB46736					gene5175					gene5237
		GB46739					gene5175					gene5237
		GB46739					gene5202					gene5237
		GB46741					gene5209					gene5237
		GB46744					gene5212					gene5237
		GB46757					gene5227					gene5237
		GB46757					gene5230					gene5243
		GB46761					gene5236					gene5244
		GB46768					gene5237					gene5262
		GB46771					gene5237					gene5262
		GB46774					gene5237					gene5262
		GB46786					gene5237					gene5265
		GB46832					gene5237					gene5265
		GB46844					gene5237					gene5265
		GB46877					gene5237					gene5265
		GB46878					gene5243					gene5276
		GB46886					gene5244					gene5286
		GB46886					gene5262					gene5287
		GB46887					gene5262					gene529
		GB46893					gene5262					gene5290
		GB46914					gene5265					gene5301
		GB46915					gene5265					gene5301
		GB46915					gene5265					gene5301
		GB46918					gene5265					gene5301
		GB46920					gene5276					gene5319
		GB46922					gene5286					gene5333
		GB46962					gene5287					gene5337
		GB46962					gene529					gene5343
		GB46977					gene5290					gene5345
		GB46985					gene5301					gene5345
		GB47007					gene5301					gene5348
		GB47007					gene5301					gene5350
		GB47007					gene5301					gene5351
		GB47007					gene5319					gene5361
		GB47007					gene5333					gene539
		GB47008					gene5337					gene539
		GB47010					gene5343					gene5391
		GB47026					gene5345					gene5391
		GB47028					gene5345					gene5394
		GB47028					gene5348					gene542
		GB47029					gene5350					gene542
		GB47030					gene5351					gene542
		GB47036					gene5361					gene5422
		GB47036					gene539					gene5428
		GB47039					gene539					gene5439
		GB47039					gene5391					gene5439
		GB47039					gene5391					gene5439
		GB47039					gene5394					gene5446
		GB47040					gene542					gene5447
		GB47041					gene542					gene5451
		GB47041					gene542					gene5454
		GB47045					gene5422					gene5455
		GB47049					gene5428					gene5458
		GB47049					gene5439					gene5459
		GB47049					gene5439					gene5460
		GB47049					gene5439					gene5461
		GB47054					gene5446					gene5461
		GB47075					gene5447					gene5465
		GB47079					gene5451					gene5465
		GB47091					gene5454					gene5473
		GB47091					gene5455					gene5473
		GB47102					gene5458					gene5489
		GB47103					gene5459					gene549
		GB47106					gene5460					gene5496
		GB47106					gene5461					gene5496
		GB47107					gene5461					gene5496
		GB47120					gene5465					gene550
		GB47120					gene5465					gene550
		GB47136					gene5473					gene550
		GB47140					gene5473					gene5506
		GB47142					gene5489					gene5511
		GB47146					gene549					gene5511
		GB47148					gene5496					gene5511
		GB47180					gene5496					gene5511
		GB47183					gene5496					gene5514
		GB47183					gene550					gene5534
		GB47189					gene550					gene5555
		GB47190					gene550					gene5559
		GB47190					gene5506					gene5560
		GB47202					gene5511					gene5565
		GB47203					gene5511					gene5578
		GB47203					gene5511					gene5586
		GB47217					gene5511					gene5594
		GB47224					gene5514					gene5594
		GB47224					gene5534					gene561
		GB47224					gene5555					gene5611
		GB47224					gene5559					gene5613
		GB47229					gene5560					gene5614
		GB47234					gene5565					gene5617
		GB47235					gene5578					gene5621
		GB47236					gene5586					gene5638
		GB47238					gene5594					gene564
		GB47250					gene5594					gene5651
		GB47259					gene561					gene5652
		GB47260					gene5611					gene5652
		GB47271					gene5613					gene5652
		GB47278					gene5614					gene5652
		GB47280					gene5617					gene5668
		GB47281					gene5621					gene5677
		GB47284					gene5638					gene5679
		GB47296					gene564					gene568
		GB47296					gene5651					gene5681
		GB47299					gene5652					gene5681
		GB47299					gene5652					gene569
		GB47300					gene5652					gene5694
		GB47303					gene5652					gene5699
		GB47308					gene5668					gene5704
		GB47319					gene5677					gene5704
		GB47319					gene5679					gene571
		GB47322					gene568					gene571
		GB47322					gene5681					gene5716
		GB47329					gene5681					gene5716
		GB47336					gene569					gene5720
		GB47351					gene5694					gene5720
		GB47351					gene5699					gene5720
		GB47351					gene5704					gene5721
		GB47352					gene5704					gene5722
		GB47352					gene571					gene5726
		GB47352					gene571					gene5727
		GB47352					gene5716					gene5727
		GB47372					gene5716					gene5728
		GB47379					gene5720					gene5730
		GB47381					gene5720					gene5730
		GB47383					gene5720					gene5733
		GB47385					gene5721					gene5735
		GB47411					gene5722					gene5735
		GB47415					gene5726					gene5739
		GB47418					gene5727					gene5741
		GB47418					gene5727					gene5743
		GB47420					gene5728					gene5749
		GB47422					gene5730					gene5761
		GB47423					gene5730					gene5761
		GB47423					gene5733					gene5766
		GB47428					gene5735					gene5766
		GB47430					gene5735					gene5766
		GB47431					gene5739					gene5773
		GB47431					gene5741					gene5773
		GB47443					gene5743					gene578
		GB47452					gene5749					gene5782
		GB47457					gene5761					gene5786
		GB47462					gene5761					gene5787
		GB47466					gene5766					gene5791
		GB47472					gene5766					gene5792
		GB47474					gene5766					gene5793
		GB47477					gene5773					gene5793
		GB47478					gene5773					gene5795
		GB47478					gene5776					gene5807
		GB47488					gene578					gene5807
		GB47499					gene5782					gene5808
		GB47500					gene5786					gene5814
		GB47502					gene5787					gene5814
		GB47502					gene5791					gene582
		GB47503					gene5792					gene582
		GB47513					gene5793					gene582
		GB47513					gene5793					gene583
		GB47513					gene5795					gene5832
		GB47514					gene5807					gene5844
		GB47516					gene5807					gene5844
		GB47518					gene5808					gene5844
		GB47542					gene5814					gene5857
		GB47543					gene5814					gene5857
		GB47551					gene582					gene5857
		GB47553					gene582					gene5857
		GB47553					gene582					gene5857
		GB47565					gene583					gene5857
		GB47565					gene5832					gene5857
		GB47568					gene5844					gene5857
		GB47572					gene5844					gene5857
		GB47573					gene5844					gene5857
		GB47575					gene5857					gene5857
		GB47575					gene5857					gene5866
		GB47579					gene5857					gene5867
		GB47579					gene5857					gene5867
		GB47579					gene5857					gene5868
		GB47589					gene5857					gene5871
		GB47590					gene5857					gene5871
		GB47593					gene5857					gene5871
		GB47594					gene5857					gene5871
		GB47599					gene5857					gene5871
		GB47599					gene5857					gene5871
		GB47604					gene5866					gene5871
		GB47614					gene5867					gene5871
		GB47628					gene5867					gene5879
		GB47628					gene5868					gene5879
		GB47628					gene5871					gene5879
		GB47628					gene5871					gene5879
		GB47628					gene5871					gene588
		GB47628					gene5871					gene5881
		GB47630					gene5871					gene5889
		GB47630					gene5871					gene5894
		GB47631					gene5871					gene5894
		GB47635					gene5871					gene5900
		GB47636					gene5879					gene5907
		GB47654					gene5879					gene591
		GB47655					gene5879					gene591
		GB47655					gene5879					gene592
		GB47661					gene588					gene593
		GB47661					gene5881					gene5936
		GB47668					gene5889					gene5936
		GB47678					gene5894					gene5936
		GB47678					gene5894					gene594
		GB47680					gene5900					gene594
		GB47683					gene5907					gene5940
		GB47688					gene591					gene5951
		GB47718					gene591					gene5954
		GB47736					gene592					gene5957
		GB47744					gene593					gene5957
		GB47747					gene5936					gene5957
		GB47749					gene5936					gene5957
		GB47767					gene5936					gene5958
		GB47767					gene594					gene5958
		GB47768					gene594					gene5959
		GB47769					gene5940					gene5959
		GB47769					gene5951					gene5959
		GB47779					gene5954					gene5963
		GB47788					gene5957					gene5963
		GB47788					gene5957					gene5963
		GB47799					gene5957					gene5963
		GB47803					gene5957					gene5967
		GB47808					gene5958					gene5967
		GB47808					gene5958					gene5967
		GB47812					gene5959					gene5968
		GB47814					gene5959					gene5999
		GB47816					gene5959					gene6
		GB47817					gene5963					gene6004
		GB47828					gene5963					gene6007
		GB47828					gene5963					gene6009
		GB47829					gene5963					gene6009
		GB47829					gene5967					gene6012
		GB47832					gene5967					gene6012
		GB47832					gene5967					gene6017
		GB47839					gene5968					gene6021
		GB47841					gene5999					gene6054
		GB47846					gene6					gene6063
		GB47849					gene6004					gene6066
		GB47875					gene6007					gene6066
		GB47875					gene6009					gene6066
		GB47876					gene6009					gene6067
		GB47876					gene6012					gene607
		GB47876					gene6012					gene6076
		GB47879					gene6017					gene6081
		GB47880					gene6021					gene6086
		GB47881					gene6054					gene6087
		GB47889					gene6063					gene6087
		GB47918					gene6066					gene6088
		GB47925					gene6066					gene609
		GB47928					gene6066					gene609
		GB47944					gene6067					gene609
		GB47961					gene607					gene609
		GB47962					gene6076					gene609
		GB47962					gene6081					gene6097
		GB47962					gene6086					gene6099
		GB47991					gene6087					gene610
		GB47998					gene6087					gene6105
[truncated: 2,055 more rows]

## Sheet: Amel_3
Amel_3		Grozinger et al. All_tested	Grozinger Q>W	Grozinger W>Q	Grozinger LW>W	Grozinger W>LW	Grozinger Q>LW	Grozinger LW>Q	Converted:	Grozinger et al. All_tested	Grozinger QvsW	Grozinger Q>W	Grozinger W>Q	Grozinger LWvsW	Grozinger LW>W	Grozinger W>LW	Grozinger QvsLW	Grozinger Q>LW	Grozinger LW>Q		Shared Universe		IN	FvsL	F>L	L>F	Grozinger QvsW	Grozinger Q>W	Grozinger W>Q	Grozinger LWvsW	Grozinger LW>W	Grozinger W>LW	Grozinger QvsLW	Grozinger Q>LW	Grozinger LW>Q	Overlaps:	FvsL QvsW	FvsL LWvsW	FvsL QvsLW	F>L Q>W	F>L W>Q	L>F Q>W	L>F W>Q	F>L LW>W	F>L W>LW	L>F LW>W	L>F W>LW	F>L Q>LW	F>L LW>Q
OVERLAP FvsL QvsW		GB40007	GB40013	GB40072	GB40134	GB40303	GB40029	GB40072		gene0	gene100	gene100	gene10023	gene10032	gene10032	gene1047	gene100	gene100	gene10023		gene0		SHARED	gene10014	gene10014	gene10025	gene100	gene100	gene10103	gene10032	gene10032	gene1047	gene100	gene100	gene101		gene10026	gene10032	gene10026	gene10026	gene10262	gene10344	gene10225	gene10032	gene11286	gene10441	gene11897	gene10026	gene101
Set1: 1131		GB40010	GB40022	GB40089	GB40283	GB40523	GB40031	GB40089		gene100	gene10018	gene10018	gene10103	gene10079	gene10079	gene11135	gene10018	gene10018	gene101		gene100		UNIVERSE	gene10025	gene10026	gene10120	gene10018	gene10018	gene10154	gene10079	gene10079	gene11135	gene10018	gene10018	gene10103		gene10032	gene10239	gene10035	gene10032	gene10296	gene10435	gene10358	gene10239	gene2795	gene11206	gene2466	gene10035	gene10109
Set2: 812		GB40012	GB40029	GB40092	GB40287	GB40773	GB40092	GB40092		gene10005	gene10026	gene10026	gene10154	gene10239	gene10239	gene11286	gene10026	gene10026	gene10103		gene10005			gene10026	gene10032	gene10194	gene10026	gene10026	gene10225	gene10239	gene10239	gene11286	gene10026	gene10026	gene10109		gene10114	gene10407	gene101	gene10114	gene10326	gene10441	gene10391	gene10407	gene8888	gene4267	gene3218	gene10114	gene10262
Overlap: 408		GB40013	GB40031	GB40106	GB40422	GB41247	GB40118	GB40100		gene10014	gene10032	gene10032	gene10172	gene10352	gene10352	gene1133	gene10035	gene10035	gene10109		gene10014			gene10032	gene10035	gene10224	gene10032	gene10032	gene10225	gene10352	gene10352	gene11385	gene10035	gene10035	gene10154		gene10184	gene10427	gene10109	gene10184	gene10889	gene10463	gene10447	gene10427	gene9825	gene434	gene437	gene10184	gene10296
Total number of genes: 2145		GB40022	GB40083	GB40222	GB40619	GB41377	GB40134	GB40106		gene10018	gene10040	gene10040	gene10225	gene10407	gene10407	gene11385	gene10057	gene10057	gene10154		gene10018			gene10035	gene10053	gene10225	gene10040	gene10040	gene10262	gene10407	gene10407	gene11547	gene10057	gene10057	gene10160		gene10225	gene10441	gene10114	gene10232	gene11286	gene1123	gene10596	gene10511		gene4416	gene5660	gene10291	gene10326
		GB40027	GB40092	GB40299	GB40670	GB41630	GB40134	GB40159		gene10023	gene10057	gene10057	gene10225	gene10427	gene10427	gene1148	gene10079	gene10079	gene10160		gene10025			gene10053	gene101	gene10263	gene10057	gene10057	gene10296	gene10427	gene10427	gene1176	gene10079	gene10079	gene10225		gene10232	gene10511	gene10184	gene1028	gene11338	gene1126	gene1064	gene10724		gene5829	gene7645	gene103	gene10889
Representation factor: 1.0		GB40028	GB40118	GB40341	GB40670	GB41656	GB40134	GB40161		gene10025	gene10079	gene10079	gene10262	gene10441	gene10441	gene11547	gene10113	gene10113	gene10172		gene10026			gene101	gene10109	gene10328	gene10079	gene10079	gene10296	gene10441	gene10441	gene11780	gene101	gene10114	gene10262		gene10262	gene10724	gene10225	gene10291	gene1180	gene11341	gene10706	gene1205		gene710		gene10318	gene11338
p < 0.040		GB40029	GB40118	GB40377	GB40770	GB42076	GB40139	GB40222		gene10026	gene10113	gene10113	gene10289	gene10511	gene10511	gene1176	gene10114	gene10114	gene10225		gene10032			gene10109	gene10114	gene10333	gene10103	gene10114	gene10326	gene1047	gene10511	gene11897	gene10103	gene10184	gene10296		gene1028	gene11206	gene10262	gene103	gene11826	gene11358	gene11032	gene2428		gene7709		gene1035	gene12063
		GB40033	GB40134	GB40431	GB40838	GB42210	GB40141	GB40341		gene10032	gene10114	gene10114	gene10296	gene10724	gene10724	gene11780	gene10184	gene10184	gene10262		gene10035			gene10114	gene10159	gene10344	gene10114	gene10184	gene10358	gene10511	gene10724	gene12027	gene10109	gene1019	gene10296		gene10291	gene11286	gene10291	gene10318	gene12063	gene11401	gene11116	gene2602		gene9793		gene10407	gene1282
		GB40057	GB40134	GB40505	GB41821	GB42246	GB40150	GB40377		gene10035	gene10184	gene10184	gene10296	gene10873	gene10873	gene11897	gene1019	gene1019	gene10289		gene10036			gene10120	gene10184	gene10358	gene10154	gene1019	gene10391	gene10724	gene10873	gene1679	gene10114	gene10291	gene10326		gene10296	gene11897	gene10296	gene1035	gene1282	gene11472	gene11131	gene4260		gene9982		gene10511	gene1367
OVERLAP F>L Q>W		GB40063	GB40134	GB40513	GB41917	GB42865	GB40150	GB40377		gene10036	gene1019	gene1019	gene10326	gene11206	gene11206	gene12027	gene102	gene102	gene10296		gene10040			gene10159	gene10227	gene1036	gene10184	gene10232	gene10412	gene10873	gene11206	gene2466	gene10154	gene103	gene10358		gene103	gene1205	gene103	gene10407	gene1367	gene11555	gene1132	gene4973				gene10661	gene173
Set1: 595		GB40072	GB40139	GB40516	GB42038	GB43196	GB40150	GB40505		gene10040	gene102	gene102	gene10358	gene11641	gene11641	gene1679	gene10240	gene10240	gene10296		gene10053			gene10184	gene10232	gene10382	gene1019	gene10271	gene10447	gene11135	gene11641	gene2795	gene10160	gene10318	gene10382		gene10318	gene2428	gene10318	gene10511	gene1442	gene11682	gene11472	gene5514				gene10781	gene1785
Set2: 440		GB40073	GB40141	GB40517	GB42039	GB43416	GB40150	GB40513		gene10053	gene10232	gene10232	gene10391	gene12016	gene12016	gene2466	gene10254	gene10254	gene10326		gene10057			gene10194	gene10239	gene10386	gene10225	gene1028	gene1047	gene11206	gene12016	gene3218	gene10184	gene10318	gene10391		gene10326	gene2466	gene10326	gene10544	gene173	gene11743	gene11574	gene5621				gene10814	gene1914
Overlap: 168		GB40074	GB40150	GB40517	GB42039	GB43504	GB40164	GB40517		gene10057	gene10233	gene10233	gene10412	gene1205	gene1205	gene2795	gene10291	gene10291	gene10358		gene1007			gene10224	gene10244	gene10391	gene10225	gene10291	gene1047	gene11286	gene1205	gene3582	gene1019	gene10318	gene10412		gene10344	gene2602	gene10344	gene10545	gene1914	gene11910	gene11654	gene5879				gene10980	gene2144
Total number of genes: 2145		GB40076	GB40150	GB40554	GB42039	GB44996	GB40232	GB40517		gene1007	gene10240	gene10240	gene10447	gene148	gene148	gene3039	gene103	gene103	gene10382		gene10079			gene10225	gene10247	gene10435	gene10232	gene103	gene10560	gene11385	gene148	gene3919	gene10225	gene10318	gene10447		gene1035	gene2795	gene1035	gene10661	gene2144	gene11915	gene11887	gene5963				gene11014	gene2433
		GB40077	GB40150	GB40563	GB42183	GB45518	GB40237	GB40554		gene10079	gene10271	gene10271	gene1047	gene1625	gene1625	gene3218	gene10318	gene10318	gene10391		gene101			gene10227	gene1026	gene10441	gene10262	gene10318	gene10596	gene11547	gene1625	gene437	gene10262	gene10344	gene1047		gene10358	gene3218	gene10358	gene10699	gene2386	gene11926	gene11994	gene6771				gene11130	gene2443
Representation factor: 1.4		GB40083	GB40150	GB40626	GB42942	GB47513	GB40280	GB40563		gene101	gene1028	gene1028	gene1047	gene1667	gene1667	gene3582	gene10318	gene10318	gene10412		gene10103			gene10232	gene10262	gene10447	gene10271	gene10318	gene10599	gene11641	gene1773	gene5660	gene10291	gene1035	gene10560		gene10391	gene4260	gene10382	gene10724	gene2443	gene11952	gene1203	gene6965				gene11146	gene2693
p < 5.495e-08		GB40089	GB40164	GB40626	GB43036	GB47686	GB40283	GB40626		gene10103	gene10291	gene10291	gene10560	gene1773	gene1773	gene3919	gene10318	gene10318	gene10447		gene10109			gene10239	gene1028	gene10452	gene1028	gene10318	gene1064	gene1176	gene203	gene7515	gene10296	gene10352	gene10596		gene10407	gene4267	gene10391	gene10781	gene2693	gene12062	gene1407	gene698				gene11213	gene2752
		GB40092	GB40232	GB40656	GB43053	GB48451	GB40287	GB40626		gene10109	gene103	gene103	gene10596	gene203	gene203	gene437	gene10318	gene10318	gene1047		gene10114			gene10244	gene10291	gene10463	gene10291	gene10318	gene10706	gene11780	gene2084	gene7645	gene10296	gene10352	gene10599		gene10435	gene434	gene10407	gene10814	gene2922	gene12318	gene1491	gene699				gene11218	gene2922
		GB40098	GB40237	GB40676	GB43054	GB49152	GB40303	GB40626		gene10114	gene10318	gene10318	gene10599	gene2084	gene2084	gene5660	gene10344	gene10344	gene10560		gene10120			gene10247	gene10296	gene10479	gene10296	gene10342	gene10712	gene11897	gene2150	gene8888	gene103	gene10352	gene10706		gene10441	gene437	gene10435	gene10868	gene3052	gene1261	gene1585	gene7280				gene11267	gene3052
OVERLAP F>L W>Q		GB40100	GB40267	GB40700	GB43180	GB49356	GB40308	GB40628		gene10120	gene10318	gene10318	gene1064	gene2150	gene2150	gene6494	gene10347	gene10347	gene10596		gene10126			gene1026	gene103	gene10483	gene10296	gene10344	gene10740	gene12016	gene2170	gene9825	gene10318	gene10368	gene1075		gene10447	gene4416	gene10447	gene1091	gene3058	gene131	gene1724	gene7851				gene11297	gene3058
Set1: 595		GB40106	GB40280	GB40705	GB43293	GB49498	GB40310	GB40656		gene10126	gene10318	gene10318	gene10706	gene2170	gene2170	gene7515	gene1035	gene1035	gene10599		gene10145			gene10262	gene10311	gene10510	gene103	gene1035	gene1075	gene12027	gene2170		gene10318	gene10407	gene10872		gene10463	gene4973	gene10463	gene10980	gene3297	gene2069	gene1846	gene9419				gene11313	gene3297
Set2: 372		GB40108	GB40281	GB40741	GB43542	GB49977	GB40358	GB40676		gene10145	gene10318	gene10318	gene10712	gene2170	gene2170	gene7645	gene10352	gene10352	gene10705		gene10154			gene10263	gene10318	gene10512	gene10318	gene10352	gene1081	gene1205	gene2195		gene10318	gene10435	gene10872		gene10511	gene5514	gene10511	gene11014	gene4023	gene210	gene2	gene9736				gene11317	gene4023
Overlap: 57		GB40109	GB40283	GB40762	GB43643	GB50102	GB40444	GB40741		gene10154	gene10342	gene10342	gene10740	gene2195	gene2195	gene7990	gene10352	gene10352	gene10706		gene10158			gene1028	gene10326	gene10515	gene10318	gene10352	gene10872	gene148	gene2428		gene10318	gene1045	gene10872		gene10544	gene5621	gene10596	gene1104	gene4304	gene2132	gene2187	gene9972				gene11382	gene4304
Total number of genes: 2145		GB40113	GB40287	GB40765	GB44422	GB50402	GB40451	GB40762		gene10158	gene10344	gene10344	gene1075	gene2428	gene2428	gene8888	gene10352	gene10352	gene1075		gene10159			gene10291	gene10332	gene1053	gene10318	gene10352	gene10872	gene1625	gene2602		gene10326	gene10463	gene10872		gene10545	gene5660	gene10661	gene11091	gene4463	gene2192	gene2211					gene11539	gene4463
		GB40118	GB40308	GB40773	GB44482	GB50633	GB40457	GB40765		gene10159	gene10347	gene10347	gene1081	gene2602	gene2602	gene9825	gene10368	gene10368	gene10872		gene10160			gene10296	gene10335	gene10596	gene10318	gene10368	gene10873	gene1679	gene2634		gene10344	gene10511	gene10873		gene10596	gene5829	gene10706	gene11146	gene4564	gene2226	gene2226					gene11628	gene4564
Representation factor: 0.6		GB40119	GB40358	GB40794	GB44482	GB51356	GB40479	GB40773		gene10160	gene1035	gene1035	gene10872	gene2634	gene2634		gene10407	gene10407	gene10872		gene10176			gene103	gene1035	gene1064	gene10326	gene10368	gene10873	gene1773	gene3612		gene1035	gene10513	gene10873		gene1064	gene5879	gene10781	gene11213	gene463	gene2411	gene2251					gene11789	gene463
p < 5.441e-10		GB40129	GB40422	GB40794	GB44500	GB51732	GB40490	GB40794		gene10176	gene10352	gene10352	gene10872	gene3612	gene3612		gene10435	gene10435	gene10872		gene10184			gene10311	gene10407	gene1068	gene10342	gene10407	gene10873	gene203	gene4260		gene10352	gene10661	gene10873		gene10661	gene5963	gene10814	gene11218	gene4641	gene2798	gene227					gene11854	gene571
		GB40134	GB40442	GB40885	GB44726	GB53034	GB40514	GB40794		gene10184	gene10352	gene10352	gene10873	gene4260	gene4260		gene1045	gene1045	gene10872		gene1019			gene10318	gene10425	gene10689	gene10344	gene10435	gene10873	gene2084	gene4260		gene10352	gene10781	gene10873		gene10699	gene6771	gene10889	gene11267	gene5244	gene3104	gene2466					gene11892	gene5793
		GB40141	GB40444	GB40901	GB44791	GB53287	GB40523	GB40885		gene1019	gene10352	gene10352	gene10873	gene4260	gene4260		gene10463	gene10463	gene10873		gene10194			gene10326	gene10427	gene10706	gene1035	gene10441	gene10889	gene2150	gene4260		gene10352	gene10781	gene10873		gene10706	gene6965	gene10958	gene11270	gene571	gene327	gene2499					gene12057	gene5963
OVERLAP L>F Q>W		GB40145	GB40451	GB40908	GB44798	GB53438	GB40527	GB40901		gene10194	gene10368	gene10368	gene10873	gene4260	gene4260		gene10511	gene10511	gene10873		gene10205			gene10328	gene10449	gene10768	gene10352	gene1045	gene10973	gene2170	gene4267		gene10358	gene10805	gene10889		gene10724	gene698	gene10980	gene11297	gene6112	gene3345	gene2746					gene12059	gene6112
Set1: 536		GB40150	GB40456	GB40911	GB44841	GB54419	GB40565	GB40908		gene10205	gene10368	gene10368	gene10873	gene4267	gene4267		gene10513	gene10513	gene10873		gene10211			gene10332	gene10470	gene10806	gene10352	gene10463	gene10996	gene2170	gene434		gene10368	gene10810	gene10958		gene10781	gene699	gene11014	gene11313	gene6128	gene3429	gene2781					gene12208	gene6128
Set2: 440		GB40151	GB40457	GB40916	GB44849	GB55704	GB40608	GB40911		gene10211	gene10407	gene10407	gene10889	gene434	gene434		gene10661	gene10661	gene10873		gene10224			gene10333	gene10472	gene10808	gene10352	gene10511	gene10996	gene2195	gene4416		gene10382	gene10814	gene10973		gene10814	gene710	gene11032	gene11317	gene6162	gene3573	gene2804					gene1308	gene6162
Overlap: 77		GB40157	GB40479	GB40928	GB44963	GB55751	GB40619	GB40928		gene10224	gene10435	gene10435	gene10973	gene4416	gene4416		gene10764	gene10764	gene10873		gene10225			gene10335	gene10511	gene10858	gene10358	gene10513	gene11032	gene2428	gene4512		gene10391	gene10837	gene10975		gene10868	gene7280	gene11130	gene11382	gene6173	gene3685	gene2845					gene1379	gene6173
Total number of genes: 2145		GB40159	GB40490	GB40932	GB45062		GB40670	GB40932		gene10225	gene10441	gene10441	gene10996	gene4512	gene4512		gene10765	gene10765	gene10889		gene10227			gene10344	gene10544	gene10888	gene10368	gene10544	gene11099	gene2466	gene4512		gene10407	gene10872	gene10996		gene10889	gene7645	gene11131	gene11539	gene6550	gene3737	gene2898					gene1458	gene6385
		GB40169	GB40514	GB40973	GB45101		GB40718	GB40973		gene10227	gene1045	gene1045	gene10996	gene4512	gene4512		gene10781	gene10781	gene10958		gene10232			gene1035	gene10545	gene10957	gene10368	gene10545	gene11116	gene2602	gene4652		gene10412	gene10903	gene10996		gene1091	gene7709	gene11146	gene11628	gene6658	gene3769	gene2989					gene1631	gene6550
Representation factor: 0.7		GB40208	GB40527	GB40975	GB45157		GB40746	GB40975		gene10232	gene10463	gene10463	gene11032	gene4652	gene4652		gene10781	gene10781	gene10973		gene10234			gene10358	gene10561	gene10958	gene10391	gene10661	gene11131	gene2634	gene4973		gene10435	gene10980	gene11032		gene10980	gene7851	gene11206	gene11789	gene6717	gene3814	gene3					gene1712	gene6643
p < 1.907e-05		GB40217	GB40536	GB40980	GB45377		GB40750	GB40984		gene10234	gene10511	gene10511	gene11099	gene4973	gene4973		gene10805	gene10805	gene10975		gene10235			gene1036	gene10562	gene10959	gene10407	gene10699	gene11157	gene2795	gene5265		gene10447	gene11014	gene11099		gene11014	gene8888	gene11213	gene11821	gene684	gene389	gene3240					gene1887	gene6658
		GB40226	GB40565	GB41030	GB45458		GB40760	GB41030		gene10235	gene10513	gene10513	gene11116	gene5265	gene5265		gene10810	gene10810	gene10996		gene10239			gene10382	gene10613	gene10984	gene10412	gene10724	gene11159	gene3218	gene5344		gene1045	gene11130	gene11131		gene11032	gene9419	gene11218	gene11857	gene6965	gene4070	gene3345					gene2061	gene6717
		GB40232	GB40598	GB41094	GB45617		GB40770	GB41043		gene10239	gene10544	gene10544	gene11131	gene5302	gene5302		gene10814	gene10814	gene10996		gene10244			gene10386	gene10619	gene10993	gene10435	gene10781	gene11279	gene3582	gene5514		gene10463	gene11140	gene11206		gene1104	gene9736	gene11267	gene1205	gene7019	gene4212	gene3508					gene2208	gene6747
OVERLAP L>F W>Q		GB40237	GB40608	GB41203	GB45951		GB40779	GB41094		gene10244	gene10545	gene10545	gene11157	gene5344	gene5344		gene10837	gene10837	gene11032		gene10247			gene10391	gene10649	gene11012	gene10441	gene10781	gene11286	gene3612	gene5621		gene1047	gene11146	gene11279		gene11091	gene9793	gene11297	gene12057	gene7165	gene4267	gene3606					gene2210	gene6771
Set1: 536		GB40238	GB40619	GB41224	GB46031		GB40794	GB41156		gene10247	gene10661	gene10661	gene11159	gene5514	gene5514		gene10872	gene10872	gene11099		gene10249			gene10407	gene10661	gene11032	gene10447	gene10782	gene1132	gene3919	gene5829		gene10511	gene11160	gene1132		gene11116	gene9825	gene11313	gene12059	gene7421	gene434	gene3738					gene2274	gene684
Set2: 372		GB40240	GB40670	GB41243	GB46067		GB40809	GB41162		gene10249	gene10699	gene10699	gene11279	gene5621	gene5621		gene10903	gene10903	gene11131		gene1026			gene10425	gene10694	gene11046	gene1045	gene10810	gene1132	gene4260	gene5879		gene10513	gene11213	gene1132		gene11131	gene9972	gene11317	gene12208	gene7558	gene4416	gene3769					gene2283	gene6965
Overlap: 112		GB40259	GB40670	GB41247	GB46211		GB40838	GB41165		gene1026	gene10724	gene10724	gene11286	gene5829	gene5829		gene10913	gene10913	gene11206		gene10262			gene10427	gene10699	gene11052	gene10463	gene10814	gene11338	gene4260	gene5879		gene10560	gene11218	gene1132		gene11146	gene9982	gene1132	gene1308	gene7752	gene4853	gene3800					gene2352	gene7165
Total number of genes: 2145		GB40267	GB40711	GB41372	GB46302		GB40845	GB41176		gene10262	gene10764	gene10764	gene1132	gene5879	gene5879		gene10980	gene10980	gene11279		gene10263			gene10435	gene1070	gene11080	gene1047	gene10868	gene11385	gene4260	gene5963		gene10596	gene11267	gene1132		gene11213		gene11338	gene1379	gene7754	gene5473	gene3898					gene2387	gene7421
		GB40278	GB40718	GB41377	GB46330		GB40857	GB41203		gene10263	gene10765	gene10765	gene1132	gene5879	gene5879		gene11008	gene11008	gene1132		gene10271			gene10441	gene10702	gene11086	gene1047	gene10872	gene11466	gene4267	gene6621		gene10599	gene11297	gene11338		gene11218		gene11341	gene1458	gene7851	gene5511	gene4122					gene2391	gene7558
Representation factor: 1.2		GB40280	GB40735	GB41378	GB46526		GB40885	GB41224		gene10271	gene10781	gene10781	gene1133	gene5963	gene5963		gene11014	gene11014	gene1132		gene1028			gene10447	gene10724	gene11098	gene10511	gene10903	gene11472	gene434	gene6771		gene10661	gene11313	gene11472		gene1123		gene11358	gene151	gene7937	gene5829	gene4127					gene243	gene7752
p < 0.008		GB40282	GB40746	GB41389	GB46616		GB40887	GB41247		gene1028	gene10781	gene10781	gene11338	gene5995	gene5995		gene11039	gene11039	gene1132		gene10283			gene10449	gene10746	gene11105	gene10513	gene1091	gene11472	gene437	gene6965		gene10706	gene11317	gene11472		gene1126		gene11382	gene1631	gene8062	gene6170	gene4171					gene2435	gene7851
		GB40283	GB40760	GB41399	GB47080		GB40939	GB41253		gene10283	gene10782	gene10782	gene11385	gene5995	gene5995		gene11130	gene11130	gene1132		gene10291			gene10452	gene10767	gene11106	gene10544	gene10980	gene11573	gene4416	gene698		gene1075	gene11341	gene11573		gene11267		gene11401	gene1712	gene8124	gene6392	gene4214					gene2552	gene7937
		GB40289	GB40769	GB41449	GB47106		GB40941	GB41372		gene10291	gene10810	gene10810	gene11466	gene6621	gene6621		gene11140	gene11140	gene11338		gene10293			gene10463	gene10770	gene11116	gene10545	gene11014	gene11574	gene4512	gene699		gene10781	gene11358	gene11574		gene11270		gene11472	gene2061	gene838	gene6818	gene426					gene2757	gene8124
OVERLAP FvsL RWvsSW		GB40299	GB40770	GB41516	GB47140		GB40941	GB41378		gene10293	gene10814	gene10814	gene11472	gene6771	gene6771		gene11146	gene11146	gene11366		gene10296			gene10470	gene10775	gene11131	gene10560	gene1104	gene11641	gene4512	gene710		gene10781	gene11382	gene11592		gene11286		gene11539	gene2111	gene8835	gene6929	gene4267					gene2763	gene838
Set1: 1131		GB40301	GB40779	GB41543	GB47148		GB41011	GB41389		gene10296	gene10868	gene10868	gene11472	gene6965	gene6965		gene11160	gene11160	gene11472		gene103			gene10472	gene10781	gene11205	gene10596	gene11091	gene11654	gene4652	gene7221		gene10805	gene11401	gene11641		gene11297		gene11574	gene2208	gene898	gene7004	gene4336					gene2795	gene8835
Set2: 87		GB40302	GB40838	GB41598	GB47224		GB41011	GB41449		gene103	gene10872	gene10872	gene1148	gene698	gene698		gene11213	gene11213	gene11472		gene10305			gene10479	gene10804	gene11206	gene10599	gene11118	gene1176	gene4973	gene7280		gene10810	gene11468	gene11641		gene11313		gene11628	gene2210	gene9276	gene7009	gene437					gene2857	gene898
Overlap: 44		GB40303	GB40845	GB41628	GB47768		GB41011	GB41516		gene10305	gene10903	gene10903	gene11573	gene699	gene699		gene11218	gene11218	gene11573		gene10311			gene10483	gene10814	gene1123	gene1064	gene11140	gene1176	gene5265	gene7709		gene10814	gene11472	gene11641		gene11317		gene11654	gene2274	gene9382	gene7262	gene4430					gene318	gene9276
Total number of genes: 2145		GB40308	GB40857	GB41630	GB47799		GB41011	GB41543		gene10311	gene1091	gene1091	gene11574	gene710	gene710		gene11267	gene11267	gene11574		gene10315			gene10510	gene10826	gene11245	gene10661	gene11140	gene11780	gene5344	gene7851		gene10837	gene11539	gene11641		gene1132		gene11682	gene2283	gene942	gene7342	gene4511					gene3284	gene9382
		GB40310	GB40868	GB41630	GB47841		GB41011	GB41598		gene10315	gene10913	gene10913	gene11641	gene7221	gene7221		gene11297	gene11297	gene11592		gene10318			gene10511	gene10828	gene1126	gene10699	gene11146	gene1180	gene5514	gene8537		gene10872	gene11547	gene11641		gene11338		gene11743	gene2352	gene9435	gene7415	gene4675					gene339	gene942
Representation factor: 1.0		GB40312	GB40885	GB41630	GB47904		GB41011	GB41628		gene10318	gene10980	gene10980	gene11654	gene7280	gene7280		gene11299	gene11299	gene11641		gene10326			gene10512	gene10868	gene11263	gene10706	gene11213	gene11826	gene5621	gene862		gene10872	gene11587	gene11641		gene11341		gene11789	gene2387	gene9983	gene7681	gene4765					gene347	gene9435
p < 0.381		GB40320	GB40887	GB41645	GB47977		GB41065	GB41630		gene10326	gene11008	gene11008	gene1176	gene7709	gene7709		gene11313	gene11313	gene11641		gene10328			gene10515	gene10879	gene11265	gene10712	gene11218	gene11887	gene5660	gene8993		gene10872	gene11628	gene11654		gene11358		gene11854	gene2391		gene7761	gene4996					gene3527	gene9466
		GB40343	GB40939	GB41654	GB47977		GB41068	GB41630		gene10328	gene11014	gene11014	gene1176	gene7851	gene7851		gene11317	gene11317	gene11641		gene10332			gene1053	gene10889	gene11272	gene10724	gene1123	gene11958	gene5829	gene9107		gene10872	gene11628	gene11682		gene11382		gene11892	gene243		gene7869	gene5166					gene3616	gene9983
		GB40348	GB40944	GB41670	GB48840		GB41192	GB41654		gene10332	gene11039	gene11039	gene11780	gene7974	gene7974		gene11341	gene11341	gene11641		gene10333			gene10544	gene10900	gene1132	gene10740	gene1126	gene11958	gene5879	gene9419		gene10872	gene11682	gene1176		gene11401		gene11897	gene2552		gene8071	gene5250					gene3687
OVERLAP F>L RW>SW		GB40356	GB40997	GB41671	GB48937		GB41227	GB41698		gene10333	gene1104	gene1104	gene11795	gene8537	gene8537		gene11358	gene11358	gene11641		gene10335			gene10545	gene10905	gene11330	gene1075	gene11267	gene11994	gene5879	gene9596		gene10873	gene11697	gene1176		gene11472		gene11910	gene2602		gene8095	gene529					gene3887
Set1: 595		GB40358	GB41011	GB41710	GB49093		GB41280	GB41700		gene10335	gene11091	gene11091	gene1180	gene862	gene862		gene11382	gene11382	gene11641		gene10342			gene10561	gene10906	gene11341	gene10781	gene11270	gene11994	gene5963	gene9736		gene10873	gene11743	gene11812		gene11539		gene11915	gene2757		gene8166	gene5343					gene3982
Set2: 66		GB40360	GB41011	GB41751	GB49124		GB41283	GB41710		gene10342	gene11118	gene11118	gene11826	gene8993	gene8993		gene11401	gene11401	gene11654		gene10344			gene10562	gene1091	gene11350	gene10781	gene1129	gene12027	gene6621	gene9736		gene10873	gene11789	gene11958		gene11555		gene11926	gene2763		gene8498	gene539					gene4016
Overlap: 24		GB40377	GB41011	GB41756	GB49801		GB41285	GB41751		gene10344	gene11140	gene11140	gene11887	gene9107	gene9107		gene11443	gene11443	gene11682		gene1035			gene10596	gene10934	gene11358	gene10782	gene11297	gene12028	gene6771	gene9793		gene10873	gene1184	gene11958		gene11574		gene11952	gene2857		gene8514	gene5422					gene4177
Total number of genes: 2145		GB40385	GB41011	GB41786	GB49993		GB41289	GB41797		gene1035	gene11140	gene11140	gene11958	gene9419	gene9419		gene11468	gene11468	gene11701		gene10352			gene10613	gene10935	gene1136	gene1081	gene11313	gene1203	gene6965	gene9972		gene10873	gene1184	gene11982		gene11628		gene11982	gene3129		gene8577	gene5465					gene4189
		GB40387	GB41011	GB41797	GB50048		GB41313	GB41821		gene10352	gene11146	gene11146	gene11958	gene9596	gene9596		gene11472	gene11472	gene1176		gene10358			gene10619	gene10940	gene11401	gene10810	gene11317	gene12063	gene698	gene9982		gene10889	gene11847	gene11994		gene11654		gene11994	gene3202		gene8675	gene5660					gene4244
Representation factor: 1.3		GB40405	GB41011	GB41836	GB50142		GB41325	GB41829		gene10358	gene11213	gene11213	gene11994	gene9736	gene9736		gene11539	gene11539	gene1176		gene1036			gene1064	gene10956	gene11420	gene10814	gene11341	gene12169	gene699			gene10903	gene11854	gene11994		gene11682		gene1203	gene3284		gene8706	gene5807					gene4260
p < 0.076		GB40412	GB41011	GB41872	GB50179		GB41441	GB41836		gene1036	gene11218	gene11218	gene11994	gene9736	gene9736		gene11547	gene11547	gene11795		gene10367			gene10649	gene10960	gene11461	gene10868	gene11358	gene12198	gene710			gene10958	gene11892	gene12028		gene11743		gene12057	gene3343		gene8873	gene6004					gene4380
		GB40414	GB41065	GB41900	GB50236		GB41471	GB41872		gene10367	gene1123	gene1123	gene12027	gene9793	gene9793		gene11587	gene11587	gene11812		gene10368			gene10661	gene10980	gene11462	gene10872	gene11382	gene12275	gene7221			gene10973	gene11895	gene1203		gene11789		gene12059	gene339		gene9049	gene6012					gene4442
		GB40420	GB41068	GB41982	GB50344		GB41491	GB41897		gene10368	gene1126	gene1126	gene12028	gene9972	gene9972		gene11628	gene11628	gene11958		gene10377			gene1068	gene11002	gene11472	gene10872	gene11401	gene1252	gene7280			gene10975	gene11897	gene12063		gene1180		gene12063	gene3460		gene9090	gene6478					gene463
OVERLAP F>L SW>RW		GB40422	GB41139	GB42016	GB50415		GB41602	GB41900		gene10377	gene11267	gene11267	gene1203	gene9982	gene9982		gene11628	gene11628	gene11958		gene10381			gene10689	gene11014	gene11555	gene10872	gene11468	gene1282	gene7515			gene10980	gene11900	gene12198		gene11821		gene12208	gene347		gene9175	gene6638					gene4665
Set1: 595		GB40426	GB41146	GB42031	GB50672		GB41602	GB41908		gene10381	gene11270	gene11270	gene12063	gene1047			gene11642	gene11642	gene11982		gene10382			gene10694	gene1103	gene1157	gene10873	gene11472	gene1291	gene7645			gene10996	gene11910	gene12275		gene11826		gene12318	gene3527		gene919	gene6940					gene4686
Set2: 21		GB40427	GB41150	GB42038	GB50800		GB41602	GB41942		gene10382	gene1129	gene1129	gene12074	gene11135			gene11682	gene11682	gene11994		gene10386			gene10699	gene1104	gene11574	gene10873	gene11539	gene1356	gene7709			gene10996	gene11915	gene1252		gene11857		gene1261	gene3616		gene9467	gene6953					gene4798
Overlap: 4		GB40431	GB41207	GB42139	GB51257		GB41608	GB41942		gene10386	gene11297	gene11297	gene12089	gene11286			gene11697	gene11697	gene11994		gene10388			gene1070	gene11044	gene11583	gene10873	gene11547	gene1358	gene7851			gene11014	gene11926	gene1282		gene11887		gene1282	gene3678		gene9515	gene6998					gene4802
Total number of genes: 2145		GB40434	GB41227	GB42165	GB51336		GB41653	GB41964		gene10388	gene11299	gene11299	gene12169	gene1133			gene11725	gene11725	gene12028		gene10391			gene10702	gene1105	gene11588	gene10873	gene11555	gene1367	gene8537			gene11032	gene11952	gene1291		gene11910		gene1308	gene3687		gene9641	gene7116					gene4803
		GB40436	GB41283	GB42194	GB51372		GB41659	GB41982		gene10391	gene11313	gene11313	gene12198	gene11385			gene11743	gene11743	gene1203		gene10407			gene10706	gene11091	gene11648	gene10889	gene11587	gene1367	gene862			gene11099	gene12030	gene1312		gene11915		gene131	gene3887		gene9793	gene7218					gene4966
Representation factor: 0.7		GB40439	GB41289	GB42210	GB51787		GB41669	GB42000		gene10407	gene11317	gene11317	gene12275	gene1148			gene11759	gene11759	gene12063		gene10409			gene10724	gene11119	gene11649	gene10903	gene11628	gene138	gene8888			gene11130	gene12057	gene1356		gene11926		gene1367	gene3982		gene9812	gene730					gene4973
p < 0.266		GB40442	GB41313	GB42246	GB51830		GB41681	GB42016		gene10409	gene11341	gene11341	gene1252	gene11547			gene11789	gene11789	gene12074		gene10411			gene10746	gene11129	gene11654	gene1091	gene11628	gene1390	gene8993			gene11131	gene12059	gene1358		gene11952		gene1379	gene4016			gene735					gene5111
		GB40444	GB41325	GB42249	GB51995		GB41741	GB42031		gene10411	gene11358	gene11358	gene1270	gene1176			gene1184	gene1184	gene12198		gene10412			gene10767	gene11130	gene11682	gene10973	gene11682	gene1407	gene9107			gene11140	gene12118	gene1367		gene11994		gene1407	gene4177			gene7415					gene5301
		GB40451	GB41441	GB42249	GB52039		GB41747	GB42038		gene10412	gene11382	gene11382	gene1282	gene11780			gene1184	gene1184	gene12275		gene10420			gene10768	gene11132	gene11689	gene10980	gene11697	gene1436	gene9419			gene11146	gene12134	gene1388		gene1203		gene1458	gene4189			gene7463					gene5405
OVERLAP L>F RW>SW		GB40452	GB41471	GB42260	GB52090		GB41757	GB42138		gene10420	gene11401	gene11401	gene1291	gene11897			gene11847	gene11847	gene1252		gene10425			gene10770	gene11136	gene11696	gene10996	gene11743	gene1442	gene9596			gene11160	gene12208	gene1390		gene1205		gene1534	gene4244			gene7657					gene550
Set1: 536		GB40454	GB41491	GB42326	GB52266		GB41779	GB42139		gene10425	gene11414	gene11414	gene1356	gene12027			gene11854	gene11854	gene1270		gene10427			gene10775	gene11146	gene11717	gene10996	gene11756	gene1491	gene9736			gene11206	gene12271	gene1407		gene12057		gene1585	gene4260			gene7804					gene5716
Set2: 66		GB40456	GB41602	GB42334	GB52465		GB41808	GB42161		gene10427	gene11443	gene11443	gene1358	gene1679			gene11892	gene11892	gene1282		gene10432			gene10781	gene11153	gene11743	gene11014	gene11789	gene1503	gene9736			gene11213	gene12318	gene1436		gene12059		gene1631	gene4363			gene784					gene583
Overlap: 10		GB40460	GB41602	GB42334	GB53062		GB41811	GB42165		gene10432	gene11468	gene11468	gene1367	gene2466			gene11895	gene11895	gene1291		gene10435			gene10804	gene11158	gene11744	gene11032	gene11801	gene1503	gene9793			gene11218	gene1261	gene1503		gene12062		gene1712	gene4380			gene786					gene5857
Total number of genes: 2145		GB40467	GB41602	GB42356	GB53340		GB41818	GB42194		gene10435	gene11472	gene11472	gene1367	gene2795			gene11897	gene11897	gene1312		gene10440			gene10806	gene11183	gene11747	gene1104	gene11821	gene1564	gene9825			gene11267	gene1308	gene1503		gene12063		gene1724	gene4432			gene7873					gene5879
		GB40473	GB41608	GB42415	GB53341		GB41917	GB42249		gene10440	gene11539	gene11539	gene138	gene3039			gene11900	gene11900	gene1349		gene10441			gene10808	gene11200	gene11793	gene11091	gene11821	gene1585	gene9972			gene11279	gene131	gene1503		gene12208		gene173	gene4442			gene7876					gene588
Representation factor: 0.6		GB40478	GB41659	GB42455	GB53563		GB41922	GB42249		gene10441	gene11547	gene11547	gene1390	gene3218			gene11910	gene11910	gene1356		gene10447			gene10814	gene11213	gene11804	gene11099	gene1184	gene1724	gene9982			gene11297	gene1379	gene1534		gene12318		gene1785	gene4478			gene7984					gene5940
p < 0.037		GB40479	GB41659	GB42527	GB53747		GB41979	GB42249		gene10447	gene11555	gene11555	gene1401	gene3582			gene11915	gene11915	gene1358		gene10449			gene10826	gene11218	gene11850	gene11116	gene1184	gene173				gene11313	gene1400	gene1564		gene1261		gene1827	gene4665			gene7989					gene6054
		GB40490	GB41681	GB42541	GB53798		GB42019	GB42249		gene10449	gene11580	gene11580	gene1407	gene3919			gene11926	gene11926	gene1367		gene1045			gene10828	gene11246	gene11887	gene11118	gene11847	gene1846				gene11317	gene1407	gene1585		gene1282		gene1887	gene4686			gene807					gene607
		GB40504	GB41697	GB42567	GB53862		GB42039	GB42260		gene1045	gene11587	gene11587	gene1436	gene437			gene11952	gene11952	gene1388		gene10452			gene10858	gene1125	gene11888	gene11131	gene11857	gene1868				gene1132	gene1428	gene1625		gene1308		gene1914	gene4798			gene8070					gene6228
OVERLAP L>F SW>RW		GB40513	GB41715	GB42584	GB54127		GB42076	GB42326		gene10452	gene11628	gene11628	gene1442	gene5660			gene12023	gene12023	gene1390		gene10453			gene10868	gene11267	gene11897	gene11140	gene11895	gene1914				gene1132	gene1458	gene1724		gene131		gene2	gene4802			gene8184					gene6230
Set1: 536		GB40517	GB41741	GB42592	GB54137		GB42110	GB42332		gene10453	gene11628	gene11628	gene1491	gene6494			gene12030	gene12030	gene1407		gene10463			gene10879	gene11270	gene11910	gene11140	gene11900	gene1991				gene1132	gene148	gene173		gene1367		gene2061	gene4803			gene8202					gene6519
Set2: 21		GB40519	GB41747	GB42603	GB54265		GB42172	GB42334		gene10463	gene11642	gene11642	gene1503	gene7515			gene12057	gene12057	gene1436		gene10468			gene10888	gene11286	gene11915	gene11146	gene11910	gene2				gene1132	gene1511	gene1785		gene1379		gene2069	gene4879			gene823					gene6639
Overlap: 6		GB40541	GB41757	GB42652	GB54496		GB42228	GB42334		gene10468	gene11682	gene11682	gene1503	gene7645			gene12059	gene12059	gene1503		gene1047			gene10889	gene11288	gene11926	gene11157	gene11915	gene2144				gene11338	gene1582	gene1838		gene1407		gene2144	gene4966			gene8259					gene665
Total number of genes: 2145		GB40554	GB41779	GB42652	GB54508		GB42266	GB42356		gene1047	gene11697	gene11697	gene1564	gene7990			gene12067	gene12067	gene1503		gene10470			gene10900	gene11293	gene11939	gene11159	gene11926	gene2150				gene11341	gene1631	gene186		gene1442		gene2175	gene4973			gene8761					gene6788
		GB40556	GB41793	GB42767	GB54634		GB42356	GB42372		gene10470	gene11715	gene11715	gene1585	gene8888			gene12118	gene12118	gene1503		gene10472			gene10905	gene11297	gene11952	gene11213	gene11952	gene2187				gene11358	gene1712	gene1868		gene1458		gene2187	gene5079			gene8782					gene6792
Representation factor: 1.1		GB40563	GB41806	GB42783	GB54634		GB42360	GB42415		gene10472	gene11725	gene11725	gene1724	gene9825			gene12134	gene12134	gene1534		gene10479			gene10906	gene11313	gene11982	gene11218	gene12030	gene2211				gene11382	gene1722	gene1914		gene1491		gene2192	gene5111			gene8803					gene6915
p < 0.433		GB40565	GB41811	GB42814	GB54996		GB42378	GB42455		gene10479	gene11743	gene11743	gene173				gene12151	gene12151	gene1564		gene1048			gene1091	gene11317	gene11994	gene1123	gene1205	gene2211				gene11401	gene1727	gene1991		gene151		gene2208	gene5112			gene9076					gene7082
		GB40576	GB41818	GB42817	GB55039		GB42385	GB42527		gene1048	gene11756	gene11756	gene1810				gene12178	gene12178	gene1585		gene10483			gene10934	gene11318	gene1200	gene1126	gene12057	gene2226				gene11468	gene1773	gene2		gene1585		gene2210	gene5301			gene913					gene7085
		GB40592	GB41859	GB42819	GB55229		GB42409	GB42541		gene10483	gene11759	gene11759	gene1846				gene12208	gene12208	gene1625		gene10510			gene10935	gene11333	gene12005	gene11267	gene12059	gene2226				gene11472	gene1827	gene2105		gene1631		gene2211	gene5337			gene9202					gene709
OVERLAP FvsL QvsRW		GB40594	GB41917	GB42840	GB55378		GB42422	GB42560		gene10510	gene11789	gene11789	gene1868				gene1223	gene1223	gene1724		gene10511			gene10940	gene11336	gene1203	gene11270	gene12062	gene2243				gene11472	gene1879	gene2144		gene1712		gene2226	gene5405			gene9209					gene7198
Set1: 1131		GB40596	GB41979	GB42862	GB55378		GB42422	GB42567		gene10511	gene11801	gene11801	gene1914				gene12266	gene12266	gene173		gene10512			gene10956	gene11338	gene12049	gene11279	gene12118	gene2251				gene11472	gene1887	gene2150		gene1724		gene2251	gene550			gene9462					gene7330
Set2: 789		GB40598	GB42019	GB42864	GB55524		GB42482	GB42579		gene10512	gene11821	gene11821	gene1991				gene12271	gene12271	gene1732		gene10513			gene10957	gene11344	gene12055	gene11286	gene12134	gene227				gene11539	gene1907	gene2150		gene173		gene2258	gene5514			gene9492					gene7555
Overlap: 379		GB40603	GB42024	GB42865	GB55618		GB42496	GB42584		gene10513	gene11821	gene11821	gene2				gene12318	gene12318	gene1785		gene10515			gene10958	gene11353	gene12062	gene1129	gene12208	gene2275				gene11547	gene2017	gene2175		gene1846		gene227	gene5565			gene9519					gene7695
Total number of genes: 2145		GB40619	GB42038	GB42881	GB55646		GB42571	GB42592		gene10515	gene1184	gene1184	gene2089				gene1261	gene1261	gene1810		gene1053			gene10959	gene11367	gene12126	gene11297	gene12271	gene2358				gene11573	gene2061	gene2187		gene1914		gene2274	gene5594			gene953					gene7725
		GB40626	GB42039	GB42933	GB55997		GB42591	GB42595		gene1053	gene1184	gene1184	gene2144				gene1308	gene1308	gene1838		gene10544			gene10960	gene11381	gene12157	gene11313	gene12318	gene2380				gene11574	gene2069	gene2211		gene2		gene2283	gene5716			gene9608					gene7883
Representation factor: 0.9		GB40629	GB42039	GB42940			GB42604	GB42603		gene10544	gene11847	gene11847	gene2150				gene131	gene131	gene186		gene10545			gene10980	gene11382	gene12193	gene11317	gene1261	gene2386				gene11587	gene2084	gene2211		gene2061		gene2318	gene583			gene9659					gene7935
p < 5.289e-04		GB40648	GB42039	GB42941			GB42608	GB42644		gene10545	gene11857	gene11857	gene2187				gene1349	gene1349	gene1868		gene10559			gene10984	gene11473	gene12318	gene1132	gene1308	gene2390				gene11592	gene2099	gene2226		gene2069		gene2333	gene5857			gene9662					gene8015
		GB40652	GB42110	GB42942			GB42652	GB42652		gene10559	gene11895	gene11895	gene2211				gene1349	gene1349	gene1909		gene10560			gene10993	gene11481	gene1250	gene1132	gene131	gene2390				gene11628	gene2112	gene2226		gene210		gene2352	gene5879			gene9742					gene8084
		GB40653	GB42141	GB42984			GB42652	GB42652		gene10560	gene11900	gene11900	gene2211				gene1379	gene1379	gene1909		gene10561			gene11002	gene11539	gene1261	gene11338	gene1379	gene2443				gene11628	gene2169	gene2226		gene2111		gene2387	gene588			gene9787					gene8153
OVERLAP F>L Q>RW		GB40656	GB42172	GB43077			GB42663	GB42767		gene10561	gene11910	gene11910	gene2226				gene1400	gene1400	gene1914		gene10562			gene11012	gene11604	gene131	gene11341	gene1400	gene2466				gene11641	gene2170	gene2243		gene2132		gene2391	gene5940			gene9855					gene8224
Set1: 595		GB40670	GB42183	GB43093			GB42675	GB42783		gene10562	gene11915	gene11915	gene2226				gene1407	gene1407	gene1991		gene10567			gene11014	gene11610	gene1313	gene11358	gene1428	gene2499				gene11641	gene2170	gene2251		gene2144		gene2411	gene6054			gene9882					gene8234
Set2: 373		GB40673	GB42201	GB43103			GB42685	GB42814		gene10567	gene11926	gene11926	gene2243				gene1428	gene1428	gene2		gene10596			gene1103	gene11613	gene1395	gene11382	gene1458	gene2648				gene11641	gene2192	gene2258		gene2187		gene243	gene607								gene833
Overlap: 137		GB40678	GB42252	GB43111			GB42728	GB42817		gene10596	gene11952	gene11952	gene2251				gene1458	gene1458	gene2105		gene10599			gene11032	gene11628	gene1398	gene11385	gene148	gene2693				gene11641	gene2208	gene227		gene2192		gene2433	gene6228								gene8339
Total number of genes: 2145		GB40694	GB42266	GB43114			GB42732	GB42819		gene10599	gene12023	gene12023	gene227				gene148	gene148	gene2144		gene10613			gene1104	gene11660	gene1407	gene11401	gene151	gene2695				gene11641	gene2210	gene2275		gene2208		gene2435	gene6230								gene8415
		GB40700	GB42312	GB43119			GB42732	GB42840		gene10613	gene12030	gene12030	gene2275				gene1506	gene1506	gene2150		gene10619			gene11044	gene11695	gene1418	gene11466	gene1511	gene2746				gene11641	gene2226	gene2358		gene2210		gene2443	gene6261								gene8429
Representation factor: 1.3		GB40703	GB42360	GB43133			GB42770	GB42849		gene10619	gene1205	gene1205	gene2288				gene1511	gene1511	gene2150		gene1064			gene11046	gene11733	gene1491	gene11468	gene1545	gene2781				gene11654	gene2248	gene2375		gene2211		gene2499	gene6359								gene8461
p < 1.909e-05		GB40705	GB42378	GB43138			GB42809	GB42864		gene1064	gene12057	gene12057	gene2288				gene1582	gene1582	gene2175		gene10649			gene1105	gene11755	gene1492	gene11472	gene1582	gene2783				gene11682	gene2269	gene2380		gene2226		gene2552	gene6366								gene8523
		GB40708	GB42385	GB43138			GB42814	GB42865		gene10649	gene12059	gene12059	gene2358				gene1631	gene1631	gene2187		gene10654			gene11052	gene11766	gene15	gene11472	gene1631	gene2804				gene11682	gene2274	gene2390		gene2251		gene2693	gene6406								gene8697
		GB40711	GB42422	GB43195			GB42871	GB42881		gene10654	gene12062	gene12062	gene2380				gene1712	gene1712	gene2211		gene10661			gene11080	gene11789	gene1534	gene11472	gene1712	gene2845				gene11697	gene2283	gene2390		gene227		gene2746	gene6519								gene8813
OVERLAP F>L RW>Q		GB40713	GB42422	GB43196			GB42880	GB42941		gene10661	gene12065	gene12065	gene2386				gene1722	gene1722	gene2211		gene1068			gene11086	gene1180	gene1547	gene11539	gene1722	gene2898				gene11743	gene2291	gene2433		gene2274		gene2752	gene6639								gene8888
Set1: 595		GB40718	GB42482	GB43217			GB42997	GB42942		gene1068	gene12067	gene12067	gene2390				gene1727	gene1727	gene2226		gene10689			gene11091	gene11821	gene1556	gene11547	gene1727	gene2908				gene1176	gene2318	gene2443		gene2283		gene2757	gene665								gene8933
Set2: 416		GB40735	GB42571	GB43234			GB43004	GB42942		gene10689	gene12118	gene12118	gene2390				gene1763	gene1763	gene2226		gene10694			gene11098	gene11826	gene1563	gene11555	gene1773	gene2922				gene1176	gene2333	gene2499		gene2352		gene2763	gene6788								gene8940
Overlap: 59		GB40741	GB42591	GB43238			GB43004	GB42942		gene10694	gene12134	gene12134	gene2443				gene1773	gene1773	gene2226		gene10699			gene11105	gene11839	gene1585	gene11573	gene1798	gene2988				gene11789	gene2352	gene2634		gene2386		gene2778	gene698								gene9041
Total number of genes: 2145		GB40746	GB42604	GB43239			GB43016	GB42960		gene10699	gene12151	gene12151	gene2466				gene1827	gene1827	gene2243		gene1070			gene11106	gene11852	gene1586	gene11574	gene1879	gene2989				gene11812	gene2387	gene2693		gene2387		gene2781	gene699								gene9072
		GB40747	GB42608	GB43242			GB43034	GB42976		gene1070	gene12178	gene12178	gene2499				gene1879	gene1879	gene2251		gene10702			gene11116	gene11854	gene1630	gene11587	gene2017	gene3				gene1184	gene2391	gene2695		gene2391		gene2795	gene7082								gene9114
Representation factor: 0.5		GB40750	GB42652	GB43245			GB43036	GB42984		gene10702	gene12208	gene12208	gene2648				gene1887	gene1887	gene2258		gene10706			gene11119	gene11857	gene1639	gene11628	gene203	gene3052				gene1184	gene2411	gene2746		gene2411		gene2798	gene7085								gene9260
p < 3.623e-13		GB40751	GB42652	GB43245			GB43054	GB43077		gene10706	gene1223	gene1223	gene2693				gene1907	gene1907	gene227		gene10712			gene11129	gene11892	gene1677	gene11628	gene2061	gene3058				gene11847	gene243	gene2752		gene243		gene2804	gene7180								gene9428
		GB40759	GB42663	GB43258			GB43086	GB43080		gene10712	gene12271	gene12271	gene2695				gene2017	gene2017	gene2275		gene10724			gene11130	gene11893	gene1703	gene11641	gene2069	gene3113				gene11854	gene2432	gene2778		gene2443		gene283	gene7198								gene9431
		GB40760	GB42675	GB43258			GB43112	GB43093		gene10724	gene12318	gene12318	gene2746				gene2061	gene2061	gene2288		gene10730			gene11131	gene11942	gene171	gene11654	gene2084	gene3113				gene11892	gene2435	gene2781		gene2466		gene2845	gene7280								gene9523
OVERLAP L>F Q>RW		GB40765	GB42685	GB43266			GB43116	GB43103		gene10730	gene1261	gene1261	gene2781				gene2069	gene2069	gene2358		gene10740			gene11132	gene11971	gene1724	gene11682	gene2099	gene3124				gene11895	gene2453	gene2804		gene2499		gene2857	gene7330								gene9569
Set1: 536		GB40766	GB42728	GB43275			GB43141	GB43105		gene10740	gene1308	gene1308	gene2783				gene2084	gene2084	gene2375		gene10745			gene11136	gene1205	gene1741	gene11697	gene210	gene3184				gene11897	gene2477	gene2845		gene2552		gene2898	gene7409								gene9736
Set2: 373		GB40769	GB42732	GB43362			GB43168	GB43111		gene10745	gene131	gene131	gene2804				gene2099	gene2099	gene2380		gene10746			gene11146	gene12057	gene1770	gene11743	gene2111	gene3201				gene11900	gene2543	gene2849		gene2602		gene2922	gene7555								gene9825
Overlap: 74		GB40770	GB42732	GB43375			GB43184	GB43114		gene10746	gene1349	gene1349	gene2845				gene2112	gene2112	gene2390		gene1075			gene11153	gene12059	gene180	gene11756	gene2112	gene3201				gene11910	gene2552	gene2898		gene2693		gene2989	gene7695								gene9831
Total number of genes: 2145		GB40773	GB42736	GB43425			GB43223	GB43119		gene1075	gene1349	gene1349	gene2898				gene214	gene214	gene2390		gene10767			gene11158	gene12063	gene1827	gene1176	gene2132	gene3240				gene11915	gene2631	gene2908		gene2746		gene3	gene7725								gene9972
		GB40785	GB42770	GB43434			GB43226	GB43133		gene10767	gene1379	gene1379	gene2908				gene2169	gene2169	gene2433		gene10768			gene11183	gene1211	gene1846	gene1176	gene2169	gene3271				gene11926	gene2757	gene2922		gene2757		gene3041	gene778								gene9985
Representation factor: 0.8		GB40794	GB42810	GB43455			GB43229	GB43138		gene10768	gene1400	gene1400	gene2922				gene2170	gene2170	gene2443		gene10770			gene11200	gene12161	gene1896	gene11780	gene2170	gene3297				gene11952	gene2763	gene2988		gene2763		gene3052	gene7883								gene9987
p < 0.006		GB40796	GB42814	GB43459			GB43231	GB43138		gene10770	gene1428	gene1428	gene2950				gene2170	gene2170	gene2499		gene10775			gene11205	gene12208	gene196	gene11789	gene2170	gene3345				gene11958	gene2795	gene2989		gene2781		gene3058	gene7935
		GB40802	GB42871	GB43468			GB43236	GB43203		gene10775	gene1458	gene1458	gene2988				gene2192	gene2192	gene2557		gene10781			gene11206	gene12210	gene2	gene1180	gene2192	gene3407				gene11958	gene2798	gene3		gene2798		gene3104	gene8084
		GB40804	GB42880	GB43543			GB43248	GB43217		gene10781	gene148	gene148	gene2989				gene2208	gene2208	gene2634		gene10782			gene11213	gene1224	gene2007	gene11801	gene2195	gene3452				gene11982	gene283	gene3052		gene2804		gene318	gene8224
OVERLAP L>F RW>Q		GB40805	GB42922	GB43545			GB43276	GB43234		gene10782	gene1506	gene1506	gene3				gene2210	gene2210	gene2693		gene10789			gene11218	gene12248	gene2015	gene11821	gene2208	gene3456				gene11994	gene2857	gene3058		gene2845		gene3284	gene833
Set1: 536		GB40808	GB42936	GB43548			GB43280	GB43238		gene10789	gene151	gene151	gene3052				gene2226	gene2226	gene2695		gene10804			gene1123	gene1236	gene2069	gene11821	gene2210	gene3466				gene11994	gene2942	gene3113		gene2857		gene3297	gene8415
Set2: 416		GB40809	GB42997	GB43551			GB43444	GB43239		gene10804	gene1511	gene1511	gene3058				gene2248	gene2248	gene2746		gene10805			gene11245	gene127	gene2096	gene11826	gene2226	gene3508				gene12028	gene3041	gene3113		gene2898		gene3345	gene8429
Overlap: 118		GB40816	GB43004	GB43658			GB43462	GB43242		gene10805	gene1545	gene1545	gene306				gene2269	gene2269	gene2752		gene10806			gene11246	gene1282	gene210	gene1184	gene2248	gene3602				gene1203	gene3061	gene3113		gene2922		gene339	gene8461
Total number of genes: 2145		GB40818	GB43004	GB43847			GB43467	GB43245		gene10806	gene1582	gene1582	gene306				gene2274	gene2274	gene2778		gene10808			gene1125	gene1308	gene2131	gene1184	gene2269	gene3606				gene12030	gene3104	gene3124		gene2989		gene3429	gene8523
		GB40838	GB43016	GB43851			GB43504	GB43258		gene10808	gene1631	gene1631	gene306				gene2283	gene2283	gene2781		gene1081			gene1126	gene1317	gene2132	gene11847	gene2274	gene3738				gene12057	gene318	gene3184		gene3		gene347	gene8697
Representation factor: 1.1		GB40845	GB43034	GB43856			GB43541	GB43258		gene1081	gene1667	gene1667	gene3102				gene2291	gene2291	gene2804		gene10810			gene11263	gene1364	gene2135	gene11857	gene2283	gene3769				gene12059	gene318	gene3201		gene3052		gene3527	gene8813
p < 0.045		GB40857	GB43036	GB43906			GB43572	GB43266		gene10810	gene1712	gene1712	gene3113				gene2318	gene2318	gene2845		gene10814			gene11265	gene1367	gene2137	gene11887	gene2291	gene3772				gene12063	gene3284	gene3201		gene3058		gene3573	gene8888
		GB40859	GB43053	GB43909			GB43573	GB43275		gene10814	gene1722	gene1722	gene3113				gene2333	gene2333	gene2849		gene10826			gene11267	gene1379	gene2160	gene11895	gene2352	gene3772				gene12118	gene3301	gene3201		gene3104		gene3606	gene8933
		GB40865	GB43054	GB43921			GB43618	GB43293		gene10826	gene1727	gene1727	gene3124				gene2352	gene2352	gene2898		gene10828			gene11270	gene1408	gene2174	gene11900	gene2387	gene3785				gene12134	gene3345	gene3205		gene3129		gene3616	gene8940
		GB40866	GB43086	GB43948			GB43708	GB43293		gene10828	gene1763	gene1763	gene3161				gene2361	gene2361	gene2908		gene10837			gene11272	gene1425	gene2175	gene11910	gene2391	gene3800				gene12198	gene339	gene3271		gene3202		gene3685	gene9041
		GB40868	GB43112	GB43950			GB43717	GB43305		gene10837	gene1773	gene1773	gene3164				gene2387	gene2387	gene2922		gene10842			gene11286	gene1442	gene2187	gene11915	gene2411	gene381				gene12208	gene3415	gene3297		gene3240		gene3687	gene9072
		GB40871	GB43116	GB43991			GB43727	GB43362		gene10842	gene1798	gene1798	gene3184				gene2391	gene2391	gene2950		gene10849			gene11288	gene1458	gene2192	gene11926	gene2426	gene3825				gene12271	gene3420	gene3345		gene327		gene3738	gene9114
		GB40878	GB43141	GB44042			GB43731	GB43375		gene10849	gene1879	gene1879	gene3201				gene2411	gene2411	gene2988		gene10858			gene11293	gene1464	gene2193	gene11952	gene243	gene3847				gene12275	gene3429	gene3407		gene3284		gene3769	gene9161
		GB40885	GB43160	GB44049			GB43742	GB43434		gene10858	gene2017	gene2017	gene3201				gene243	gene243	gene2989		gene10868			gene11297	gene151	gene2211	gene11958	gene2432	gene3893				gene12318	gene347	gene3452		gene3297		gene3814	gene920
		GB40887	GB43168	GB44060			GB43742	GB43449		gene10868	gene203	gene203	gene3224				gene2430	gene2430	gene3		gene10872			gene11313	gene1555	gene2226	gene11958	gene2453	gene3898				gene1252	gene3527	gene3456		gene3343		gene3887	gene9260
		GB40894	GB43175	GB44080			GB43825	GB43455		gene10872	gene2061	gene2061	gene3240				gene2432	gene2432	gene3052		gene10873			gene11317	gene1593	gene2237	gene11994	gene2477	gene3903				gene1261	gene357	gene3466		gene3345		gene389	gene9316
		GB40901	GB43180	GB44093			GB43868	GB43459		gene10873	gene2069	gene2069	gene3271				gene2435	gene2435	gene3058		gene10879			gene11318	gene1594	gene2251	gene11994	gene2543	gene3919				gene1282	gene3573	gene3602		gene339		gene3898	gene9325
		GB40906	GB43184	GB44129			GB43920	GB43468		gene10879	gene2084	gene2084	gene3297				gene2453	gene2453	gene306		gene10888			gene1132	gene1631	gene2258	gene12027	gene2552	gene3937				gene1291	gene3616	gene3606		gene3429		gene3959	gene9409
		GB40908	GB43201	GB44141			GB43937	GB43507		gene10888	gene2099	gene2099	gene3345				gene2477	gene2477	gene306		gene10889			gene11330	gene165	gene227	gene12028	gene2602	gene3951				gene1308	gene3685	gene3612		gene3460		gene3982	gene9419
		GB40911	GB43205	GB44174			GB43938	GB43542		gene10889	gene210	gene210	gene3407				gene2543	gene2543	gene3102		gene10900			gene11333	gene1684	gene2318	gene1203	gene2757	gene3951				gene131	gene3687	gene3738		gene347		gene4016	gene9428
		GB40916	GB43226	GB44174			GB43963	GB43545		gene10900	gene2111	gene2111	gene3452				gene2552	gene2552	gene3113		gene10903			gene11336	gene1712	gene2333	gene12030	gene2763	gene3951				gene1312	gene3722	gene3738		gene3508		gene4023	gene9431
		GB40923	GB43229	GB44175			GB43978	GB43548		gene10903	gene2112	gene2112	gene3456				gene2631	gene2631	gene3113		gene10905			gene11338	gene173	gene2346	gene1205	gene2798	gene3986				gene1356	gene3762	gene3769		gene3527		gene4070	gene9523
		GB40928	GB43231	GB44197			GB43999	GB43636		gene10905	gene2132	gene2132	gene3466				gene2757	gene2757	gene3113		gene10906			gene11341	gene1785	gene2348	gene12057	gene2834	gene4023				gene1358	gene3769	gene3772		gene3573		gene4122	gene9569
		GB40932	GB43236	GB44295			GB43999	GB43658		gene10906	gene214	gene214	gene3508				gene2763	gene2763	gene3124		gene1091			gene11344	gene1799	gene2384	gene12059	gene2857	gene4098				gene1367	gene3795	gene3772		gene3606		gene4127	gene9736
		GB40934	GB43248	GB44300			GB44014	GB43847		gene1091	gene2169	gene2169	gene3602				gene2795	gene2795	gene3164		gene10910			gene11350	gene1800	gene2389	gene12062	gene2910	gene4116				gene1379	gene3814	gene3785		gene3616		gene4157	gene9972
		GB40941	GB43276	GB44317			GB44019	GB43851		gene10910	gene2170	gene2170	gene3606				gene2798	gene2798	gene3184		gene10912			gene11353	gene1858	gene2411	gene12063	gene3061	gene4122				gene1388	gene3876	gene381		gene3678		gene4171	gene9985
		GB40944	GB43280	GB44330			GB44039	GB43855		gene10912	gene2170	gene2170	gene3635				gene283	gene283	gene3201		gene10917			gene11358	gene1887	gene2466	gene12118	gene3104	gene4127				gene1390	gene3887	gene3825		gene3685		gene4177	gene9987
		GB40945	GB43444	GB44336			GB44058	GB43856		gene10917	gene2192	gene2192	gene3738				gene2857	gene2857	gene3201		gene10918			gene1136	gene1905	gene2499	gene12134	gene3129	gene4136				gene1400	gene389	gene3847		gene3687		gene4189
		GB40946	GB43462	GB44336			GB44071	GB43883		gene10918	gene2195	gene2195	gene3769				gene2899	gene2899	gene3201		gene10926			gene11367	gene1914	gene2611	gene12169	gene319	gene4164				gene1407	gene395	gene3848		gene3737		gene4214
		GB40967	GB43467	GB44336			GB44104	GB43906		gene10926	gene2208	gene2208	gene3772				gene2942	gene2942	gene3205		gene10931			gene11381	gene195	gene2622	gene12198	gene3202	gene4171				gene1407	gene3982	gene3858		gene3738		gene4244
		GB40969	GB43504	GB44340			GB44113	GB43909		gene10931	gene2210	gene2210	gene3772				gene3009	gene3009	gene3224		gene10934			gene11382	gene1995	gene2677	gene12208	gene327	gene4214				gene1428	gene3986	gene3893		gene3769		gene426
		GB40973	GB43541	GB44347			GB44146	GB43917		gene10934	gene2226	gene2226	gene3785				gene3039	gene3039	gene3271		gene10935			gene11401	gene2061	gene27	gene12271	gene3284	gene426				gene1436	gene4016	gene3898		gene3800		gene4260
		GB40975	GB43553	GB44385			GB44175	GB43921		gene10935	gene2248	gene2248	gene3800				gene3041	gene3041	gene3297		gene1094			gene11420	gene2086	gene2705	gene12275	gene3301	gene4267				gene1458	gene4040	gene3937		gene3814		gene4267
		GB40976	GB43572	GB44428			GB44189	GB43948		gene1094	gene2269	gene2269	gene381				gene3061	gene3061	gene3345		gene10940			gene11461	gene2111	gene2723	gene12318	gene3343	gene4279				gene148	gene4070	gene3951		gene3887		gene4304
		GB40977	GB43573	GB44515			GB44207	GB43950		gene10940	gene2274	gene2274	gene3825				gene3104	gene3104	gene3407		gene10941			gene11462	gene2144	gene2746	gene1252	gene3345	gene4304				gene1503	gene414	gene3951		gene389		gene4335
		GB40980	GB43618	GB44523			GB44225	GB43991		gene10941	gene2283	gene2283	gene3847				gene317	gene317	gene3452		gene10948			gene11472	gene2147	gene2774	gene1261	gene339	gene4328				gene1503	gene4157	gene3951		gene3898		gene4336
		GB40984	GB43643	GB44528			GB44252	GB44042		gene10948	gene2291	gene2291	gene3893				gene3171	gene3171	gene3456		gene10956			gene11473	gene2158	gene2778	gene1282	gene3420	gene4336				gene1503	gene4177	gene3951		gene3982		gene434
		GB40986	GB43697	GB44568			GB44252	GB44049		gene10956	gene2352	gene2352	gene3898				gene318	gene318	gene3466		gene10957			gene11481	gene2162	gene2781	gene1291	gene3429	gene4347				gene1511	gene4189	gene3959		gene4016		gene437
		GB40996	GB43708	GB44596			GB44276	GB44079		gene10957	gene2361	gene2361	gene3903				gene318	gene318	gene3602		gene10958			gene11539	gene2208	gene2798	gene1308	gene3460	gene4348				gene1534	gene4192	gene3986		gene4023		gene4380
		GB40997	GB43717	GB44636			GB44331	GB44080		gene10958	gene2373	gene2373	gene3919				gene3251	gene3251	gene3606		gene10959			gene11555	gene2210	gene2804	gene131	gene347	gene437				gene1564	gene4244	gene3991		gene4070		gene4430
		GB40999	GB43727	GB44636			GB44334	GB44085		gene10959	gene2387	gene2387	gene3934				gene3284	gene3284	gene3612		gene10960			gene1157	gene2215	gene283	gene1356	gene3527	gene4384				gene1582	gene4260	gene4023		gene4122		gene4442
		GB41003	GB43731	GB44648			GB44350	GB44093		gene10960	gene2391	gene2391	gene3937				gene3301	gene3301	gene3635		gene10973			gene11574	gene2255	gene2845	gene1358	gene357	gene4430				gene1585	gene430	gene4122		gene4127		gene4463
		GB41011	GB43742	GB44648			GB44396	GB44121		gene10973	gene2411	gene2411	gene3940				gene3345	gene3345	gene3738		gene10975			gene11583	gene2271	gene2898	gene1367	gene3573	gene4463				gene1625	gene434	gene4127		gene4171		gene4489
		GB41025	GB43742	GB44663			GB44445	GB44129		gene10975	gene2426	gene2426	gene3951				gene339	gene339	gene3738		gene10977			gene11588	gene2274	gene2933	gene1367	gene3616	gene4495				gene1631	gene4345	gene4136		gene4177		gene4511
		GB41027	GB43868	GB44685			GB44500	GB44141		gene10977	gene243	gene243	gene3951				gene3415	gene3415	gene3769		gene10980			gene11604	gene2277	gene2935	gene1379	gene3678	gene4495				gene1712	gene4380	gene4164		gene4189		gene4564
		GB41028	GB43920	GB44718			GB44503	GB44174		gene10980	gene2430	gene2430	gene3951				gene3420	gene3420	gene3772		gene10984			gene11610	gene2283	gene2989	gene138	gene3685	gene4511				gene1722	gene4442	gene4171		gene4212		gene4615
		GB41030	GB43938	GB44729			GB44532	GB44174		gene10984	gene2432	gene2432	gene3986				gene3429	gene3429	gene3772		gene10993			gene11613	gene2322	gene3	gene1390	gene3687	gene4511				gene1724	gene4459	gene4214		gene4214		gene463
		GB41043	GB43963	GB44773			GB44680	GB44175		gene10993	gene2453	gene2453	gene4023				gene3464	gene3464	gene3785		gene10996			gene11628	gene2352	gene3027	gene1400	gene3722	gene4564				gene1727	gene4587	gene4241		gene4244		gene4665
		GB41045	GB43978	GB44777			GB44725	GB44197		gene10996	gene2477	gene2477	gene4098				gene347	gene347	gene381		gene11002			gene11648	gene2360	gene3041	gene1407	gene3737	gene4571				gene173	gene463	gene4241		gene426		gene4669
		GB41046	GB43999	GB44869			GB44731	GB44197		gene11002	gene2543	gene2543	gene4116				gene3527	gene3527	gene3825		gene11005			gene11649	gene2365	gene3094	gene1428	gene376	gene4578				gene1773	gene4665	gene4241		gene4260		gene4675
		GB41063	GB44014	GB44873			GB44732	GB44276		gene11005	gene2552	gene2552	gene4122				gene357	gene357	gene3847		gene1101			gene11654	gene2376	gene31	gene1436	gene3762	gene463				gene1785	gene4669	gene426		gene4267		gene4686
		GB41065	GB44019	GB44917			GB44739	GB44276		gene1101	gene2602	gene2602	gene4127				gene3573	gene3573	gene3848		gene11012			gene11660	gene2383	gene3104	gene1442	gene3769	gene463				gene1827	gene4682	gene4267		gene4304		gene4765
		GB41068	GB44032	GB44960			GB44755	GB44295		gene11012	gene2757	gene2757	gene4136				gene3616	gene3616	gene3858		gene11014			gene11682	gene2386	gene3115	gene1458	gene3769	gene4641				gene1838	gene4686	gene4279		gene4336		gene4798
		GB41069	GB44039	GB44966			GB44770	GB44300		gene11014	gene2763	gene2763	gene4164				gene3635	gene3635	gene3860		gene11029			gene11689	gene2387	gene3131	gene148	gene3795	gene4650				gene186	gene4767	gene4304		gene434		gene4802
		GB41073	GB44058	GB44996			GB44824	GB44317		gene11029	gene2798	gene2798	gene4171				gene3685	gene3685	gene3893		gene1103			gene11695	gene2391	gene3156	gene1491	gene3814	gene4675				gene1868	gene4798	gene4328		gene4363		gene4803
		GB41079	GB44071	GB45001			GB44863	GB44327		gene1103	gene2834	gene2834	gene4214				gene3687	gene3687	gene3898		gene11032			gene11696	gene2392	gene3179	gene1503	gene3863	gene4758				gene1879	gene4802	gene4335		gene437		gene4853
		GB41094	GB44091	GB45013			GB44888	GB44330		gene11032	gene2857	gene2857	gene426				gene3688	gene3688	gene3937		gene1104			gene11717	gene2403	gene3218	gene1503	gene3876	gene4765				gene1887	gene4803	gene4336		gene4380		gene4966
		GB41127	GB44101	GB45029			GB44963	GB44336		gene1104	gene2899	gene2899	gene4267				gene3693	gene3693	gene3940		gene11041			gene11733	gene2427	gene3240	gene151	gene3887	gene4823				gene1907	gene4853	gene4347		gene4416		gene4971
		GB41129	GB44104	GB45101			GB44969	GB44336		gene11041	gene2910	gene2910	gene4279				gene3693	gene3693	gene3951		gene11044			gene11743	gene2428	gene3253	gene1511	gene389	gene4908				gene1914	gene4853	gene437		gene4430		gene4973
		GB41134	GB44113	GB45105			GB44980	GB44336		gene11044	gene3009	gene3009	gene4304				gene3722	gene3722	gene3951		gene11045			gene11744	gene2429	gene327	gene1545	gene3982	gene4925				gene1991	gene4916	gene4384		gene4432		gene5111
		GB41139	GB44127	GB45152			GB45044	GB44385		gene11045	gene3061	gene3061	gene4328				gene3762	gene3762	gene3951		gene11046			gene11747	gene243	gene328	gene1564	gene3986	gene4996				gene2	gene4966	gene4421		gene4442		gene5166
		GB41143	GB44146	GB45177			GB45047	GB44428		gene11046	gene3104	gene3104	gene4336				gene3769	gene3769	gene3951		gene1105			gene11755	gene2433	gene3280	gene1582	gene4016	gene5013				gene2017	gene4973	gene4430		gene4463		gene5250
		GB41146	GB44175	GB45215			GB45055	GB44464		gene1105	gene3129	gene3129	gene4347				gene3795	gene3795	gene3959		gene11052			gene11766	gene2435	gene3299	gene1585	gene4040	gene5061				gene2061	gene5111	gene4463		gene4478		gene5287
		GB41147	GB44175	GB45235			GB45099	GB44482		gene11052	gene317	gene317	gene4348				gene3814	gene3814	gene3986		gene11053			gene11789	gene2443	gene3345	gene1631	gene4040	gene5061				gene2069	gene5202	gene4489		gene4511		gene529
		GB41150	GB44189	GB45247			GB45140	GB44482		gene11053	gene3171	gene3171	gene437				gene3829	gene3829	gene3991		gene11067			gene11793	gene2448	gene3429	gene1712	gene4070	gene508				gene2084	gene5230	gene4495		gene4564		gene5301
		GB41152	GB44198	GB45260			GB45142	GB44515		gene11067	gene319	gene319	gene4384				gene3876	gene3876	gene4023		gene11080			gene1180	gene2523	gene3439	gene1722	gene414	gene5166				gene2099	gene5301	gene4511		gene463		gene5343
		GB41154	GB44202	GB45287			GB45142	GB44523		gene11080	gene3202	gene3202	gene4430				gene3887	gene3887	gene4122		gene11086			gene11804	gene2552	gene3508	gene1724	gene4177	gene5212				gene2105	gene5405	gene4512		gene4641		gene539
		GB41156	GB44207	GB45321			GB45150	GB44528		gene11086	gene327	gene327	gene4463				gene3888	gene3888	gene4127		gene11091			gene11821	gene2598	gene3573	gene1727	gene4189	gene5237				gene2112	gene5446	gene4512		gene4665		gene5405
		GB41158	GB44225	GB45336			GB45153	GB44544		gene11091	gene3284	gene3284	gene4495				gene389	gene389	gene4136		gene11092			gene11826	gene2602	gene3606	gene173	gene4197	gene5244				gene2144	gene5455	gene4564		gene4675		gene5422
		GB41164	GB44315	GB45375			GB45159	GB44596		gene11092	gene3301	gene3301	gene4495				gene3901	gene3901	gene4164		gene11094			gene11839	gene2612	gene3671	gene1773	gene4212	gene5250				gene2150	gene5465	gene4571		gene4686		gene5465
		GB41165	GB44331	GB45413			GB45159	GB44636		gene11094	gene3343	gene3343	gene4511				gene3917	gene3917	gene4171		gene11098			gene11850	gene2693	gene3681	gene1798	gene4244	gene5276				gene2150	gene5473	gene4578		gene4765		gene5473
		GB41168	GB44334	GB45500			GB45181	GB44648		gene11098	gene3345	gene3345	gene4511				gene395	gene395	gene4214		gene11099			gene11852	gene2752	gene3685	gene1846	gene4260	gene529				gene2169	gene5489	gene4615		gene4798		gene550
		GB41169	GB44396	GB45518			GB45189	GB44663		gene11099	gene339	gene339	gene4564				gene3982	gene3982	gene4241		gene11105			gene11854	gene2757	gene37	gene1868	gene4260	gene5333				gene2170	gene549	gene463		gene4802		gene5511
		GB41174	GB44396	GB45518			GB45195	GB44685		gene11105	gene3420	gene3420	gene4571				gene3986	gene3986	gene4241		gene11106			gene11857	gene2759	gene3737	gene1879	gene4260	gene5343				gene2170	gene550	gene463		gene4803		gene571
		GB41176	GB44398	GB45548			GB45225	GB44690		gene11106	gene3429	gene3429	gene4578				gene4016	gene4016	gene4241		gene11108			gene11887	gene2763	gene3738	gene1914	gene4267	gene5348				gene2175	gene550	gene4652		gene4853		gene5716
		GB41179	GB44422	GB45625			GB45277	GB44718		gene11108	gene3460	gene3460	gene463				gene4040	gene4040	gene426		gene11116			gene11888	gene2795	gene3769	gene1991	gene4290	gene539				gene2187	gene5511	gene4675		gene4879		gene5793
		GB41189	GB44431	GB45625			GB45281	GB44773		gene11116	gene3464	gene3464	gene463				gene4070	gene4070	gene4267		gene11118			gene11892	gene2800	gene3797	gene2	gene434	gene539				gene2192	gene5511	gene473		gene4966		gene5807
		GB41196	GB44500	GB45625			GB45285	GB44777		gene11118	gene347	gene347	gene4641				gene414	gene414	gene4279		gene11119			gene11893	gene2831	gene3798	gene2017	gene4345	gene5422				gene2208	gene5716	gene4758		gene4973		gene5829
		GB41203	GB44503	GB45640			GB45324	GB44849		gene11119	gene3513	gene3513	gene4650				gene4157	gene4157	gene4304		gene11129			gene11897	gene2839	gene3799	gene203	gene4363	gene5439				gene2210	gene5716	gene4765		gene4996		gene583
		GB41207	GB44532	GB45642			GB45348	GB44869		gene11129	gene3527	gene3527	gene4654				gene4177	gene4177	gene4328		gene11130			gene11910	gene2857	gene3800	gene2061	gene4380	gene5465				gene2211	gene5829	gene4823		gene5079		gene5857
		GB41208	GB44532	GB45658			GB45427	GB44873		gene11130	gene357	gene357	gene4675				gene4183	gene4183	gene4335		gene11131			gene11915	gene2877	gene3814	gene2069	gene4416	gene5617				gene2211	gene583	gene4908		gene5111		gene5879
		GB41231	GB44642	GB45679			GB45446	GB44918		gene11131	gene3573	gene3573	gene4758				gene4189	gene4189	gene4336		gene11132			gene11926	gene2897	gene3827	gene2084	gene4432	gene5651				gene2226	gene5832	gene4925		gene5112		gene588
		GB41241	GB44658	GB45689			GB45459	GB44960		gene11132	gene3616	gene3616	gene4765				gene4192	gene4192	gene4347		gene11135			gene11939	gene2922	gene389	gene2099	gene4442	gene5652				gene2226	gene5857	gene4971		gene5166		gene5940
		GB41246	GB44680	GB45810			GB45459	GB44966		gene11135	gene3635	gene3635	gene4823				gene4244	gene4244	gene437		gene11136			gene11942	gene3000	gene3898	gene210	gene4478	gene5652				gene2226	gene5857	gene5013		gene5244		gene5963
		GB41259	GB44725	GB45911			GB45469	GB44988		gene11136	gene3678	gene3678	gene4908				gene4260	gene4260	gene4384		gene11140			gene11952	gene3014	gene3959	gene2111	gene4587	gene5660				gene2226	gene5879	gene5061		gene5250		gene6004
		GB41262	GB44726	GB45922			GB45497	GB44988		gene11140	gene3685	gene3685	gene4925				gene430	gene430	gene4421		gene11146			gene11971	gene3034	gene3979	gene2112	gene4587	gene5681				gene2243	gene5879	gene5061		gene529		gene6054
		GB41280	GB44731	GB45944			GB45497	GB44996		gene11146	gene3687	gene3687	gene4996				gene434	gene434	gene4430		gene11150			gene11982	gene3052	gene3994	gene2132	gene4665	gene5681				gene2248	gene5879	gene508		gene5301		gene607
		GB41283	GB44739	GB46017			GB45501	GB44998		gene11150	gene3688	gene3688	gene5013				gene4345	gene4345	gene4463		gene11153			gene11994	gene3053	gene406	gene2144	gene4686	gene571				gene2251	gene5879	gene5166		gene5337		gene6112
		GB41285	GB44755	GB46039			GB45564	GB45001		gene11153	gene3693	gene3693	gene5061				gene4380	gene4380	gene4489		gene11157			gene1200	gene3058	gene4070	gene2150	gene4766	gene5727				gene2258	gene588	gene5212		gene5343		gene6128
		GB41287	GB44798	GB46066			GB45564	GB45013		gene11157	gene3722	gene3722	gene5061				gene4442	gene4442	gene4495		gene11158			gene12005	gene3068	gene4077	gene2169	gene4767	gene5730				gene2269	gene5881	gene5237		gene539		gene6162
		GB41288	GB44824	GB46069			GB45645	GB45029		gene11158	gene3737	gene3737	gene508				gene4459	gene4459	gene4511		gene11159			gene1203	gene3129	gene4079	gene2170	gene4798	gene5787				gene227	gene5900	gene5237		gene5405		gene6170
		GB41289	GB44841	GB46091			GB45654	GB45031		gene11159	gene376	gene376	gene5166				gene450	gene450	gene4512		gene11160			gene12049	gene318	gene4082	gene2170	gene4802	gene5800				gene2274	gene5936	gene5237		gene5422		gene6173
		GB41304	GB44863	GB46091			GB45673	GB45101		gene11160	gene3762	gene3762	gene5212				gene4587	gene4587	gene4512		gene11170			gene1205	gene3202	gene4122	gene2187	gene4803	gene5807				gene2275	gene5940	gene5250		gene5465		gene6225
		GB41332	GB44886	GB46118			GB45704	GB45105		gene11170	gene3769	gene3769	gene5237				gene463	gene463	gene4564		gene11183			gene12055	gene3213	gene4127	gene2192	gene4847	gene5844				gene2283	gene6054	gene5265		gene5473		gene6228
		GB41343	GB44888	GB46131			GB45705	GB45139		gene11183	gene3769	gene3769	gene5244				gene4665	gene4665	gene4571		gene11200			gene12057	gene3229	gene4157	gene2195	gene4853	gene5844				gene2291	gene6066	gene5276		gene550		gene6230
		GB41345	GB44963	GB46145			GB45706	GB45156		gene11200	gene3795	gene3795	gene5250				gene4669	gene4669	gene4578		gene11205			gene12059	gene323	gene4171	gene2208	gene4853	gene5867				gene2318	gene6066	gene5287		gene5511		gene6347
		GB41358	GB44963	GB46145			GB45716	GB45173		gene11205	gene3814	gene3814	gene5276				gene4682	gene4682	gene4615		gene11206			gene12062	gene3236	gene4180	gene2210	gene4879	gene5871				gene2333	gene607	gene529		gene5514		gene6385
		GB41363	GB44964	GB46268			GB45720	GB45177		gene11206	gene3829	gene3829	gene529				gene4686	gene4686	gene463		gene1121			gene12063	gene3284	gene4206	gene2211	gene4966	gene6004				gene2352	gene6081	gene5333		gene5565		gene6392
		GB41364	GB44969	GB46271			GB45741	GB45235		gene1121	gene3863	gene3863	gene5333				gene4742	gene4742	gene463		gene11213			gene1211	gene3297	gene4212	gene2211	gene4973	gene6007				gene2358	gene6170	gene5343		gene5594		gene6478
		GB41366	GB44980	GB46333			GB45795	GB45247		gene11213	gene3876	gene3876	gene5343				gene4767	gene4767	gene4652		gene11218			gene12126	gene3302	gene4214	gene2226	gene5079	gene6012				gene2375	gene6186	gene539		gene5660		gene6519
		GB41372	GB44994	GB46362			GB45820	GB45260		gene11218	gene3887	gene3887	gene5348				gene4798	gene4798	gene4675		gene11227			gene12157	gene3343	gene426	gene2226	gene5111	gene6112				gene2380	gene6191	gene539		gene571		gene6550
		GB41376	GB45020	GB46363			GB45935	GB45287		gene11227	gene3888	gene3888	gene539				gene4802	gene4802	gene473		gene1123			gene12161	gene3348	gene4267	gene2226	gene5112	gene6128				gene2387	gene6228	gene5422		gene5716		gene6599
		GB41378	GB45044	GB46365			GB45943	GB45321		gene1123	gene389	gene389	gene539				gene4803	gene4803	gene4758		gene1124			gene12193	gene3354	gene4335	gene2243	gene5202	gene6145				gene2390	gene6230	gene5439		gene5807		gene6638
		GB41398	GB45047	GB46371			GB45951	GB45336		gene1124	gene3917	gene3917	gene5422				gene4818	gene4818	gene4765		gene11245			gene12208	gene3358	gene4336	gene2248	gene5230	gene6162				gene2390	gene6267	gene5465		gene5829		gene6639
		GB41401	GB45055	GB46419			GB45972	GB45375		gene11245	gene3982	gene3982	gene5439				gene4853	gene4853	gene4823		gene11246			gene12210	gene339	gene434	gene2251	gene5301	gene6162				gene2391	gene6391	gene5617		gene583		gene6643
		GB41413	GB45086	GB46423			GB46009	GB45518		gene11246	gene3986	gene3986	gene5465				gene4853	gene4853	gene4908		gene1125			gene1224	gene3416	gene437	gene2269	gene5337	gene6162				gene2411	gene6392	gene5651		gene5857		gene665
		GB41414	GB45099	GB46427			GB46031	GB45518		gene1125	gene4016	gene4016	gene5617				gene4898	gene4898	gene4925		gene11258			gene12248	gene3442	gene4416	gene227	gene5345	gene6173				gene243	gene6438	gene5652		gene5879		gene6658
		GB41417	GB45142	GB46437			GB46035	GB45537		gene11258	gene4032	gene4032	gene5651				gene4916	gene4916	gene4971		gene1126			gene12318	gene3445	gene4417	gene2274	gene5405	gene6268				gene2432	gene6449	gene5681		gene588		gene6717
		GB41423	GB45142	GB46448			GB46052	GB45548		gene1126	gene4040	gene4040	gene5652				gene4966	gene4966	gene5013		gene11260			gene1236	gene3460	gene4419	gene2275	gene5446	gene6403				gene2433	gene6519	gene5681		gene5940		gene6747
		GB41425	GB45142	GB46479			GB46076	GB45625		gene11260	gene4040	gene4040	gene5652				gene4973	gene4973	gene5061		gene11263			gene1250	gene3463	gene442	gene2283	gene5455	gene6478				gene2435	gene6639	gene571		gene6004		gene6771
		GB41427	GB45142	GB46507			GB46214	GB45625		gene11263	gene4070	gene4070	gene5660				gene503	gene503	gene5061		gene11265			gene1261	gene347	gene4430	gene2291	gene5473	gene6485				gene2443	gene665	gene5722		gene6012		gene6788
		GB41428	GB45153	GB46513			GB46217	GB45625		gene11265	gene414	gene414	gene5681				gene5111	gene5111	gene508		gene11267			gene127	gene3482	gene4435	gene2352	gene5489	gene6485				gene2453	gene6665	gene5730		gene6054		gene6792
		GB41449	GB45159	GB46563			GB46277	GB45640		gene11267	gene4177	gene4177	gene5681				gene5190	gene5190	gene5166		gene1127			gene1282	gene3524	gene4444	gene2358	gene549	gene6490				gene2477	gene6732	gene5735		gene607		gene684
		GB41464	GB45159	GB46687			GB46277	GB45642		gene1127	gene4183	gene4183	gene5682				gene5202	gene5202	gene5212		gene11270			gene1308	gene3527	gene4473	gene2380	gene550	gene6531				gene2499	gene6788	gene5787		gene6112		gene6896
		GB41469	GB45181	GB46720			GB46340	GB45658		gene11270	gene4189	gene4189	gene571				gene5230	gene5230	gene5237		gene11272			gene131	gene3562	gene4488	gene2386	gene550	gene6550				gene2543	gene6792	gene5793		gene6128		gene6915
		GB41471	GB45184	GB46771			GB46375	GB45679		gene11272	gene4197	gene4197	gene5727				gene5301	gene5301	gene5237		gene11279			gene1313	gene3616	gene4489	gene2387	gene5511	gene6621				gene2552	gene6896	gene5800		gene6162		gene6929
		GB41487	GB45189	GB46786			GB46395	GB45689		gene11279	gene4212	gene4212	gene5730				gene5302	gene5302	gene5237		gene11286			gene1317	gene3622	gene4511	gene2390	gene5511	gene6638				gene2631	gene6908	gene5807		gene6170		gene6940
		GB41491	GB45195	GB46832			GB46420	GB45810		gene11286	gene4244	gene4244	gene5787				gene538	gene538	gene5250		gene11287			gene1364	gene3678	gene4517	gene2390	gene5511	gene6652				gene2634	gene6910	gene5844		gene6173		gene6953
		GB41516	GB45225	GB46887			GB46445	GB45819		gene11287	gene4260	gene4260	gene5800				gene5405	gene5405	gene5265		gene11288			gene1367	gene3687	gene4584	gene2391	gene5514	gene6658				gene2693	gene6915	gene5844		gene6228		gene6965
		GB41519	GB45258	GB46918			GB46490	GB45922		gene11288	gene4260	gene4260	gene5807				gene5446	gene5446	gene5276		gene1129			gene1379	gene3763	gene4591	gene2411	gene5565	gene6700				gene2695	gene6929	gene5867		gene6230		gene6998
		GB41521	GB45263	GB46962			GB46492	GB45944		gene1129	gene4260	gene4260	gene5844				gene5455	gene5455	gene5287		gene11293			gene1395	gene3765	gene4615	gene2426	gene5594	gene6717				gene2746	gene6944	gene5871		gene6261		gene7004
		GB41522	GB45277	GB47007			GB46521	GB46017		gene11293	gene4267	gene4267	gene5844				gene5465	gene5465	gene529		gene11297			gene1398	gene3803	gene464	gene243	gene5668	gene6748				gene2752	gene7004	gene592		gene6359		gene7009
		GB41523	GB45285	GB47007			GB46526	GB46039		gene11297	gene4290	gene4290	gene5867				gene5473	gene5473	gene5333		gene11300			gene1407	gene3859	gene4663	gene2432	gene5716	gene6804				gene2757	gene7009	gene5951		gene6366		gene7082
		GB41543	GB45292	GB47008			GB46533	GB46066		gene11300	gene434	gene434	gene5871				gene5489	gene5489	gene5343		gene11310			gene1408	gene3861	gene4669	gene2443	gene5716	gene6808				gene2763	gene707	gene5963		gene6392		gene7085
		GB41547	GB45324	GB47039			GB46541	GB46091		gene11310	gene4345	gene4345	gene5934				gene549	gene549	gene539		gene11313			gene1418	gene3887	gene4675	gene2453	gene5829	gene684				gene2778	gene7073	gene5963		gene6406		gene709
		GB41598	GB45348	GB47057			GB46564	GB46091		gene11313	gene4363	gene4363	gene6004				gene550	gene550	gene539		gene11317			gene1425	gene3897	gene474	gene2466	gene583	gene6881				gene2781	gene7082	gene6003		gene6478		gene7165
		GB41602	GB45415	GB47062			GB46565	GB46118		gene11317	gene4380	gene4380	gene6007				gene550	gene550	gene5422		gene11318			gene1442	gene3930	gene4765	gene2477	gene5832	gene6940				gene2795	gene7085	gene6004		gene6519		gene7198
		GB41603	GB45427	GB47091			GB46567	GB46131		gene11318	gene4416	gene4416	gene6012				gene5511	gene5511	gene5439		gene1132			gene1458	gene3950	gene4783	gene2499	gene5857	gene6953				gene2798	gene709	gene6007		gene6550		gene7218
		GB41604	GB45433	GB47099			GB46581	GB46145		gene1132	gene4432	gene4432	gene6112				gene5511	gene5511	gene5465		gene11324			gene1464	gene396	gene4853	gene2543	gene5857	gene6965				gene2804	gene7138	gene6112		gene6638		gene7262
		GB41606	GB45458	GB47146			GB46605	GB46145		gene11324	gene4442	gene4442	gene6128				gene5538	gene5538	gene5617		gene11330			gene1491	gene3969	gene4871	gene2552	gene5860	gene6998				gene283	gene7198	gene6128		gene6639		gene730
		GB41609	GB45459	GB47179			GB46627	GB46145		gene11330	gene4478	gene4478	gene6145				gene5573	gene5573	gene5651		gene11331			gene1492	gene3982	gene490	gene2602	gene5866	gene7019				gene2845	gene722	gene6162		gene665		gene7330
		GB41617	GB45459	GB47182			GB46697	GB46147		gene11331	gene450	gene450	gene6154				gene5716	gene5716	gene5652		gene11333			gene15	gene4005	gene4933	gene2648	gene5879	gene7021				gene2849	gene7221	gene6162		gene6658		gene7342
		GB41625	GB45459	GB47230			GB46739	GB46211		gene11333	gene4587	gene4587	gene6162				gene5716	gene5716	gene5681		gene11336			gene151	gene4010	gene4971	gene2693	gene5879	gene7047				gene2857	gene7227	gene6162		gene6717		gene735
		GB41628	GB45469	GB47258			GB46768	GB46266		gene11336	gene4587	gene4587	gene6162				gene5829	gene5829	gene5681		gene11338			gene1534	gene4016	gene4989	gene2695	gene5879	gene7090				gene2898	gene7262	gene6168		gene6788		gene7404
		GB41629	GB45489	GB47352			GB46771	GB46268		gene11338	gene4665	gene4665	gene6162				gene583	gene583	gene5682		gene11341			gene1547	gene4023	gene4996	gene2746	gene5879	gene7090				gene2908	gene7330	gene6173		gene6818		gene7415
		GB41634	GB45497	GB47378			GB46772	GB46273		gene11341	gene4686	gene4686	gene6173				gene5832	gene5832	gene571		gene11344			gene1555	gene4076	gene5034	gene2757	gene588	gene7094				gene2922	gene7330	gene6225		gene684		gene7421
		GB41642	GB45497	GB47378			GB46775	GB46330		gene11344	gene4742	gene4742	gene6218				gene5857	gene5857	gene5722		gene11350			gene1556	gene4100	gene507	gene2763	gene5881	gene7116				gene2942	gene7332	gene6236		gene6929		gene7463
		GB41645	GB45501	GB47418			GB46789	GB46333		gene11350	gene4766	gene4766	gene6244				gene5857	gene5857	gene5730		gene11353			gene1563	gene4131	gene5107	gene2781	gene5900	gene7165				gene2988	gene7342	gene6268		gene6940		gene7487
		GB41646	GB45534	GB47428			GB46873	GB46362		gene11353	gene4767	gene4767	gene6268				gene5865	gene5865	gene5735		gene11358			gene1585	gene4169	gene5142	gene2783	gene5936	gene7218				gene2989	gene7404	gene6347		gene6953		gene7555
		GB41651	GB45564	GB47449			GB47010	GB46365		gene11358	gene4798	gene4798	gene6286				gene5879	gene5879	gene5787		gene1136			gene1586	gene4177	gene5150	gene2798	gene5940	gene730				gene3	gene7415	gene6368		gene6965		gene7558
		GB41653	GB45564	GB47457			GB47028	GB46371		gene1136	gene4802	gene4802	gene6403				gene5879	gene5879	gene5793		gene11367			gene1593	gene4178	gene5166	gene2804	gene6054	gene735				gene3041	gene7555	gene6385		gene698		gene7657
		GB41654	GB45617	GB47509			GB47049	GB46419		gene11367	gene4803	gene4803	gene6478				gene5879	gene5879	gene5800		gene11374			gene1594	gene4189	gene5173	gene2834	gene6066	gene7415				gene3052	gene7556	gene6478		gene699		gene7695
		GB41656	GB45624	GB47513			GB47049	GB46427		gene11374	gene4818	gene4818	gene6485				gene5879	gene5879	gene5807		gene11381			gene1630	gene4239	gene5227	gene2845	gene6066	gene7421				gene3058	gene7695	gene6485		gene6998		gene7709
		GB41659	GB45645	GB47513			GB47049	GB46437		gene11381	gene4847	gene4847	gene6485				gene588	gene588	gene5844		gene11382			gene1631	gene4240	gene5250	gene2857	gene607	gene7463				gene3061	gene7725	gene6485		gene7004		gene7725
		GB41665	GB45654	GB47517			GB47104	GB46448		gene11382	gene4853	gene4853	gene6490				gene5881	gene5881	gene5844		gene11385			gene1639	gene4244	gene5287	gene2898	gene609	gene7512				gene3104	gene7761	gene6490		gene7009		gene7752
		GB41667	GB45673	GB47565			GB47114	GB46479		gene11385	gene4853	gene4853	gene6531				gene5900	gene5900	gene5867		gene11401			gene165	gene4260	gene529	gene2908	gene6170	gene7515				gene3113	gene7809	gene6490		gene7019		gene7761
		GB41668	GB45690	GB47575			GB47136	GB46513		gene11401	gene4879	gene4879	gene6546				gene5936	gene5936	gene5871		gene11420			gene1677	gene4277	gene5319	gene2910	gene6191	gene7557				gene3113	gene7883	gene6531		gene7082		gene7804
		GB41669	GB45704	GB47593			GB47140	GB46687		gene11420	gene4966	gene4966	gene6550				gene5940	gene5940	gene592		gene11422			gene1684	gene4304	gene5343	gene2922	gene6228	gene7558				gene3113	gene7900	gene6550		gene7085		gene784
		GB41670	GB45705	GB47661			GB47148	GB46720		gene11422	gene4973	gene4973	gene6621				gene5995	gene5995	gene5934		gene11427			gene1703	gene4360	gene5361	gene2988	gene6230	gene7579				gene3124	gene7935	gene6599		gene7116		gene7851
		GB41671	GB45706	GB47683			GB47183	GB46736		gene11427	gene503	gene503	gene6638				gene5995	gene5995	gene5951		gene1146			gene171	gene4363	gene539	gene2989	gene6243	gene7593				gene318	gene797	gene6621		gene7165		gene786
		GB41672	GB45716	GB47686			GB47189	GB46736		gene1146	gene5079	gene5079	gene6652				gene6054	gene6054	gene5963		gene11461			gene1712	gene4373	gene5391	gene3	gene6261	gene7657				gene318	gene800	gene6638		gene7180		gene7876
		GB41680	GB45720	GB47730			GB47192	GB46736		gene11461	gene5111	gene5111	gene6658				gene6066	gene6066	gene5963		gene11462			gene1724	gene4380	gene542	gene3052	gene6267	gene7657				gene3184	gene8015	gene6643		gene7198		gene7883
		GB41681	GB45741	GB47741			GB47248	GB46771		gene11462	gene5112	gene5112	gene6696				gene6066	gene6066	gene6003		gene11466			gene173	gene4432	gene5422	gene3058	gene6359	gene7667				gene3201	gene8071	gene6652		gene7218		gene7935
		GB41688	GB45758	GB47767			GB47278	GB46786		gene11466	gene5190	gene5190	gene6700				gene607	gene607	gene6004		gene11468			gene1741	gene4442	gene5451	gene3061	gene6366	gene7752				gene3201	gene8071	gene6658		gene7262		gene7937
		GB41690	GB45795	GB47767			GB47284	GB46832		gene11468	gene5202	gene5202	gene6717				gene6081	gene6081	gene6007		gene1147			gene1770	gene445	gene5454	gene3104	gene6375	gene7754				gene3201	gene8084	gene6700		gene7280		gene7984
		GB41697	GB45820	GB47807			GB47322	GB46887		gene1147	gene5230	gene5230	gene6748				gene6167	gene6167	gene6112		gene11472			gene1785	gene4463	gene5465	gene3113	gene6391	gene7804				gene3205	gene8095	gene6706		gene730		gene7989
		GB41698	GB45943	GB47829			GB47328	GB46918		gene11472	gene5301	gene5301	gene679				gene6170	gene6170	gene6128		gene11473			gene1799	gene4478	gene5473	gene3113	gene6392	gene784				gene3271	gene8095	gene6714		gene7330		gene800
		GB41699	GB45951	GB47839			GB47379	GB46983		gene11473	gene5302	gene5302	gene6804				gene6186	gene6186	gene6162		gene11481			gene180	gene4485	gene5511	gene3124	gene6393	gene7851				gene3284	gene8095	gene6717		gene7342		gene8015
		GB41700	GB46009	GB47842			GB47431	GB47007		gene11481	gene5337	gene5337	gene6808				gene6191	gene6191	gene6162		gene11495			gene1800	gene4537	gene5534	gene3129	gene6406	gene7853				gene3297	gene8153	gene6747		gene735		gene807
		GB41701	GB46013	GB47875			GB47474	GB47007		gene11495	gene5345	gene5345	gene684				gene6202	gene6202	gene6162		gene11522			gene1827	gene4564	gene561	gene3184	gene6438	gene786				gene3301	gene8166	gene6748		gene7409		gene8070
		GB41703	GB46031	GB47875			GB47478	GB47007		gene11514	gene538	gene538	gene6858				gene6228	gene6228	gene6168		gene11539			gene1846	gene463	gene5611	gene319	gene6449	gene7866				gene3345	gene8224	gene6771		gene7415		gene8071
		GB41704	GB46035	GB47881			GB47495	GB47008		gene11522	gene5405	gene5405	gene6881				gene6230	gene6230	gene6173		gene11547			gene1858	gene4641	gene5614	gene3201	gene6519	gene7873				gene3345	gene8234	gene6804		gene7421		gene8084
		GB41710	GB46052	GB47996			GB47502	GB47039		gene11539	gene5446	gene5446	gene6940				gene6267	gene6267	gene6218		gene11548			gene1887	gene465	gene5660	gene3201	gene6639	gene7876				gene339	gene8281	gene6808		gene7463		gene8095
		GB41711	GB46061	GB48005			GB47503	GB47057		gene11547	gene5455	gene5455	gene6953				gene6391	gene6391	gene6225		gene11555			gene1896	gene4665	gene5720	gene3202	gene665	gene7933				gene3407	gene833	gene684		gene7555		gene8124
		GB41714	GB46076	GB48005			GB47553	GB47062		gene11548	gene5473	gene5473	gene6965				gene6392	gene6392	gene6236		gene11558			gene1905	gene4667	gene5726	gene3240	gene6732	gene7937				gene3415	gene8339	gene6875		gene7558		gene8153
		GB41715	GB46119	GB48055			GB47581	GB47091		gene11555	gene5489	gene5489	gene6998				gene6407	gene6407	gene6268		gene1157			gene1914	gene4677	gene5728	gene327	gene6775	gene7984				gene3420	gene8415	gene6940		gene7657		gene8166
		GB41735	GB46146	GB48086			GB47584	GB47099		gene11558	gene549	gene549	gene7019				gene6438	gene6438	gene6286		gene11573			gene195	gene4686	gene5743	gene3271	gene6788	gene7984				gene3429	gene8429	gene6951		gene7681		gene8184
		GB41740	GB46214	GB48143			GB47589	GB47146		gene1157	gene550	gene550	gene7021				gene6449	gene6449	gene6286		gene11574			gene196	gene4701	gene5766	gene3284	gene6797	gene7989				gene3452	gene8429	gene6953		gene7695		gene8202
		GB41747	GB46217	GB48163			GB47604	GB47230		gene11573	gene550	gene550	gene7047				gene6494	gene6494	gene6347		gene11583			gene1995	gene4717	gene578	gene3297	gene6818	gene8062				gene3456	gene8455	gene6965		gene7725		gene8224
		GB41751	GB46277	GB48191			GB47638	GB47258		gene11574	gene5511	gene5511	gene7090				gene6519	gene6519	gene6368		gene11587			gene2	gene4761	gene5807	gene3301	gene6910	gene807				gene3466	gene8461	gene6965		gene7752		gene8234
		GB41753	GB46277	GB48207			GB47655	GB47352		gene11580	gene5511	gene5511	gene7090				gene6639	gene6639	gene6385		gene11588			gene2007	gene4798	gene5814	gene3343	gene6929	gene8070				gene347	gene8465	gene6965		gene7754		gene833
		GB41754	GB46302	GB48237			GB47678	GB47378		gene11583	gene5511	gene5511	gene7094				gene665	gene665	gene6478		gene11592			gene2015	gene4802	gene582	gene3345	gene6944	gene8115				gene3527	gene8498	gene6998		gene7761		gene8339
		GB41756	GB46340	GB48241			GB47679	GB47418		gene11587	gene5514	gene5514	gene7116				gene6665	gene6665	gene6485		gene11594			gene2061	gene4803	gene5829	gene3345	gene698	gene8124				gene357	gene8514	gene7021		gene778		gene838
		GB41770	GB46375	GB48241			GB47736	GB47428		gene11588	gene5565	gene5565	gene7165				gene6732	gene6732	gene6485		gene1160			gene2069	gene4859	gene5868	gene339	gene699	gene8141				gene3573	gene8523	gene7047		gene7804		gene8415
		GB41773	GB46376	GB48325			GB47747	GB47449		gene11592	gene5573	gene5573	gene7218				gene6774	gene6774	gene6490		gene11604			gene2086	gene4879	gene5894	gene3407	gene7	gene8172				gene3602	gene8552	gene7090		gene784		gene8429
		GB41775	GB46395	GB48325			GB47805	GB47457		gene11594	gene5594	gene5594	gene7248				gene6788	gene6788	gene6490		gene11610			gene2096	gene496	gene594	gene3420	gene7004	gene8184				gene3606	gene8577	gene7090		gene7851		gene8461
		GB41779	GB46420	GB48375			GB47815	GB47509		gene1160	gene5668	gene5668	gene730				gene6792	gene6792	gene6531		gene11613			gene210	gene4966	gene5957	gene3429	gene7009	gene8191				gene3612	gene859	gene7094		gene786		gene8498
		GB41781	GB46445	GB48387			GB47880	GB47513		gene11604	gene5716	gene5716	gene735				gene6880	gene6880	gene6546		gene11615			gene2111	gene4973	gene5968	gene3452	gene707	gene8191				gene3616	gene8611	gene7165		gene7869		gene8514
		GB41782	GB46450	GB48402			GB47904	GB47517		gene11610	gene5716	gene5716	gene7366				gene6896	gene6896	gene6550		gene11616			gene2131	gene5020	gene5999	gene3456	gene7082	gene8202				gene3685	gene862	gene7218		gene7873		gene8523
		GB41786	GB46521	GB48451			GB47939	GB47543		gene11613	gene5829	gene5829	gene7415				gene6908	gene6908	gene6599		gene1162			gene2132	gene5048	gene6	gene3460	gene7085	gene823				gene3687	gene8675	gene730		gene7876		gene8577
		GB41792	GB46521	GB48452			GB47977	GB47565		gene11615	gene583	gene583	gene7421				gene6910	gene6910	gene6621		gene11628			gene2135	gene5079	gene6004	gene3466	gene7138	gene8259				gene3722	gene8697	gene735		gene7883		gene8675
		GB41793	GB46526	GB48454			GB47977	GB47593		gene11616	gene5832	gene5832	gene7463				gene6915	gene6915	gene6638		gene11641			gene2137	gene5081	gene6012	gene347	gene7180	gene8259				gene3738	gene8706	gene7415		gene7935		gene8697
		GB41794	GB46533	GB48454			GB47998	GB47680		gene1162	gene5857	gene5857	gene7469				gene6929	gene6929	gene6643		gene11648			gene2144	gene5103	gene6063	gene3508	gene7198	gene8289				gene3738	gene8727	gene7421		gene7937		gene8706
		GB41796	GB46541	GB48487			GB48027	GB47683		gene11628	gene5857	gene5857	gene7469				gene6944	gene6944	gene6652		gene11649			gene2147	gene5111	gene6086	gene3527	gene722	gene8315				gene3762	gene8813	gene7463		gene7984		gene8761
		GB41797	GB46564	GB48489			GB48102	GB47686		gene11641	gene5860	gene5860	gene7512				gene696	gene696	gene6658		gene11650			gene2158	gene5112	gene6087	gene357	gene7221	gene838				gene3769	gene8824	gene7487		gene7989		gene8782
		GB41798	GB46565	GB48500			GB48105	GB47730		gene11648	gene5866	gene5866	gene7515				gene7004	gene7004	gene6696		gene11654			gene2160	gene5121	gene6097	gene3573	gene7262	gene8744				gene3769	gene8850	gene7515		gene8062		gene8790
		GB41803	GB46567	GB48626			GB48111	GB47741		gene11649	gene5879	gene5879	gene7557				gene7009	gene7009	gene6700		gene11659			gene2162	gene5129	gene6105	gene3602	gene7280	gene8761				gene3772	gene8873	gene7557		gene807		gene8803
		GB41806	GB46581	GB48632			GB48156	GB47767		gene11650	gene5879	gene5879	gene7558				gene707	gene707	gene6706		gene11660			gene2174	gene5156	gene6115	gene3606	gene7330	gene8782				gene3772	gene8888	gene7558		gene8070		gene8813
		GB41808	GB46582	GB48655			GB48157	GB47807		gene11654	gene5879	gene5879	gene7579				gene7073	gene7073	gene6714		gene11682			gene2175	gene5244	gene6149	gene3616	gene7330	gene8782				gene3785	gene8933	gene7579		gene8071		gene8835
		GB41811	GB46616	GB48670			GB48195	GB47841		gene11659	gene5879	gene5879	gene7593				gene7082	gene7082	gene6717		gene11689			gene2187	gene5262	gene616	gene3678	gene7332	gene8803				gene3795	gene8940	gene7593		gene8084		gene8873
		GB41815	GB46627	GB48671			GB48215	GB47875		gene11660	gene588	gene588	gene7657				gene7085	gene7085	gene6747		gene11695			gene2192	gene5286	gene6170	gene3685	gene7342	gene8835				gene381	gene9041	gene7657		gene8095		gene8888
		GB41821	GB46697	GB48690			GB48233	GB47875		gene11682	gene5881	gene5881	gene7657				gene709	gene709	gene6748		gene11696			gene2193	gene5301	gene6223	gene3687	gene7409	gene8855				gene3814	gene9049	gene7657		gene8124		gene8933
		GB41822	GB46739	GB48698			GB48236	GB47881		gene11689	gene5900	gene5900	gene7662				gene7138	gene7138	gene6771		gene11697			gene2208	gene5337	gene6225	gene3722	gene7415	gene8927				gene3825	gene9070	gene7667		gene8166		gene8940
		GB41824	GB46757	GB48794			GB48244	GB47996		gene11695	gene5936	gene5936	gene7667				gene7194	gene7194	gene679		gene11717			gene2210	gene5405	gene6258	gene3737	gene7555	gene898				gene3847	gene9072	gene7709		gene8184		gene898
		GB41825	GB46766	GB48797			GB48258	GB48005		gene11696	gene5940	gene5940	gene7752				gene7198	gene7198	gene6804		gene11733			gene2211	gene5458	gene6347	gene3738	gene7556	gene8993				gene3848	gene9072	gene7709		gene8202		gene9041
		GB41829	GB46771	GB48829			GB48308	GB48005		gene11697	gene5995	gene5995	gene7754				gene722	gene722	gene6808		gene11737			gene2215	gene5459	gene6365	gene376	gene7681	gene9076				gene3858	gene9089	gene7752		gene8224		gene9049
		GB41835	GB46772	GB48832			GB48366	GB48019		gene11717	gene5995	gene5995	gene7775				gene7221	gene7221	gene684		gene11743			gene2226	gene5461	gene6392	gene3762	gene7695	gene908				gene3876	gene9097	gene7788		gene823		gene9070
		GB41836	GB46775	GB48840			GB48382	GB48034		gene11733	gene5995	gene5995	gene7804				gene7227	gene7227	gene6855		gene11744			gene2237	gene5496	gene6411	gene3769	gene7725	gene9126				gene3887	gene9114	gene7804		gene8259		gene9072
		GB41839	GB46873	GB48846			GB48382	GB48055		gene11737	gene6054	gene6054	gene784				gene7262	gene7262	gene6858		gene11746			gene2251	gene550	gene6433	gene3769	gene7735	gene913				gene389	gene9114	gene784		gene833		gene9076
		GB41842	GB47010	GB48852			GB48385	GB48059		gene11743	gene6066	gene6066	gene7851				gene7330	gene7330	gene6875		gene11747			gene2255	gene5514	gene6478	gene3769	gene7751	gene9143				gene3893	gene914	gene7851		gene838		gene9089
		GB41845	GB47028	GB48894			GB48434	GB48086		gene11744	gene6066	gene6066	gene7853				gene7330	gene7330	gene6940		gene1175			gene2258	gene5555	gene6585	gene3772	gene7761	gene9202				gene3898	gene9175	gene7851		gene8415		gene9114
		GB41846	GB47049	GB48904			GB48557	GB48151		gene11746	gene607	gene607	gene786				gene7332	gene7332	gene6951		gene11755			gene227	gene5559	gene6599	gene3772	gene778	gene9209				gene3937	gene9196	gene7851		gene8429		gene913
		GB41847	GB47049	GB48905			GB48573	GB48158		gene11747	gene609	gene609	gene7866				gene7342	gene7342	gene6953		gene11756			gene2271	gene5565	gene6608	gene3785	gene7809	gene9243				gene395	gene9197	gene786		gene8461		gene9136
		GB41848	GB47080	GB48940			GB48600	GB48163		gene1175	gene6167	gene6167	gene7873				gene7404	gene7404	gene6965		gene1176			gene2274	gene5594	gene6638	gene3795	gene7869	gene9276				gene3951	gene922	gene7866		gene8498		gene9175
		GB41855	GB47104	GB48960			GB48608	GB48191		gene11755	gene6170	gene6170	gene7876				gene7415	gene7415	gene6965		gene11766			gene2277	gene5613	gene6681	gene3800	gene7883	gene9382				gene3951	gene9260	gene7876		gene8514		gene9202
		GB41859	GB47107	GB48960			GB48669	GB48199		gene11756	gene6191	gene6191	gene7933				gene7435	gene7435	gene6965		gene11779			gene2283	gene5621	gene6720	gene381	gene7900	gene942				gene3951	gene9342	gene7933		gene8523		gene9209
		GB41862	GB47114	GB48983			GB48748	GB48207		gene1176	gene6202	gene6202	gene7937				gene7469	gene7469	gene6981		gene1178			gene2318	gene569	gene6721	gene3814	gene7935	gene9430				gene3951	gene935	gene7937		gene8577		gene9260
		GB41863	GB47140	GB48999			GB48748	GB48237		gene11766	gene6228	gene6228	gene7984				gene7469	gene7469	gene6998		gene11780			gene2322	gene5694	gene6723	gene3825	gene7971	gene9430				gene3959	gene9361	gene7984		gene8675		gene9276
		GB41867	GB47148	GB49004			GB48772	GB48241		gene11779	gene6230	gene6230	gene7984				gene7538	gene7538	gene7021		gene11789			gene2333	gene5699	gene6802	gene3847	gene8071	gene9435				gene3982	gene9395	gene7984		gene8697		gene9382
		GB41872	GB47189	GB49026			GB48784	GB48325		gene1178	gene6243	gene6243	gene7989				gene7555	gene7555	gene7047		gene11790			gene2346	gene5704	gene6810	gene3863	gene8071	gene9462				gene3986	gene9428	gene7989		gene8706		gene942
		GB41882	GB47192	GB49069			GB48790	GB48325		gene11780	gene6261	gene6261	gene7990				gene7556	gene7556	gene7090		gene11793			gene2348	gene571	gene6818	gene3876	gene8084	gene9470				gene3986	gene9431	gene807		gene8761		gene9428
		GB41886	GB47202	GB49131			GB48926	GB48356		gene11789	gene6267	gene6267	gene8062				gene7695	gene7695	gene7090		gene1180			gene2352	gene5716	gene6819	gene3887	gene8095	gene9492				gene3991	gene9467	gene8070		gene8782		gene9431
		GB41889	GB47224	GB49146			GB48961	GB48387		gene11790	gene6359	gene6359	gene807				gene7725	gene7725	gene7094		gene11801			gene2360	gene5721	gene6830	gene389	gene8095	gene95				gene4016	gene9512	gene8115		gene8803		gene9435
		GB41895	GB47224	GB49167			GB48974	GB48402		gene11793	gene6366	gene6366	gene8070				gene7734	gene7734	gene7165		gene11804			gene2365	gene5741	gene6857	gene3893	gene8095	gene9519				gene4023	gene9515	gene8115		gene8813		gene9462
		GB41898	GB47248	GB49180			GB49106	GB48451		gene1180	gene6375	gene6375	gene8115				gene7761	gene7761	gene7218		gene11812			gene2376	gene5792	gene6896	gene3898	gene8166	gene953				gene4040	gene9523	gene8121		gene8835		gene9466
		GB41901	GB47278	GB49223			GB49150	GB48452		gene11801	gene6391	gene6391	gene8124				gene7809	gene7809	gene730		gene11821			gene2383	gene5793	gene6929	gene3903	gene8215	gene9531				gene4070	gene9569	gene8124		gene8873		gene9467
		GB41904	GB47284	GB49224			GB49152	GB48454		gene11804	gene6392	gene6392	gene8141				gene7867	gene7867	gene735		gene11822			gene2384	gene583	gene694	gene3919	gene8224	gene9533				gene4122	gene9578	gene8141		gene8888		gene9488
		GB41908	GB47322	GB49239			GB49165	GB48454		gene11812	gene6393	gene6393	gene8172				gene7883	gene7883	gene7366		gene11825			gene2386	gene5857	gene6940	gene3937	gene8281	gene9608				gene4127	gene963	gene8172		gene8933		gene9492
		GB41912	GB47328	GB49239			GB49207	GB48487		gene11821	gene6406	gene6406	gene8184				gene7900	gene7900	gene7415		gene11826			gene2387	gene5879	gene6953	gene3951	gene833	gene9659				gene4136	gene9641	gene8184		gene8940		gene9515
		GB41922	GB47352	GB49247			GB49227	GB48489		gene11822	gene6407	gene6407	gene8191				gene7935	gene7935	gene7421		gene11835			gene2389	gene588	gene6977	gene3951	gene8375	gene9662				gene414	gene9736	gene8191		gene898		gene9519
		GB41942	GB47379	GB49247			GB49233	GB48497		gene11825	gene6438	gene6438	gene8191				gene797	gene797	gene7463		gene11838			gene2391	gene5907	gene6998	gene3951	gene8415	gene9742				gene4157	gene9793	gene8191		gene9041		gene9523
		GB41946	GB47431	GB49248			GB49233	GB48500		gene11826	gene6449	gene6449	gene8202				gene800	gene800	gene7469		gene11839			gene2392	gene591	gene7004	gene3982	gene8429	gene9787				gene4164	gene9825	gene8202		gene9049		gene953
		GB41979	GB47474	GB49259			GB49309	GB48632		gene11835	gene6507	gene6507	gene8228				gene8015	gene8015	gene7469		gene1184			gene2403	gene5940	gene7009	gene3986	gene8429	gene9811				gene4171	gene9831	gene8289		gene9072		gene9569
		GB41980	GB47495	GB49283			GB49311	GB48655		gene11838	gene6519	gene6519	gene8229				gene8071	gene8071	gene7487		gene11847			gene2411	gene5959	gene7016	gene3986	gene8455	gene9855				gene4177	gene987	gene8315		gene9076		gene9608
		GB41982	GB47500	GB49288			GB49312	GB48659		gene11839	gene6639	gene6639	gene823				gene8071	gene8071	gene7515		gene11850			gene2427	gene5963	gene7042	gene4016	gene8461	gene9855				gene4189	gene9887	gene838		gene9090		gene9641
		GB41983	GB47502	GB49320			GB49321	GB48670		gene1184	gene665	gene665	gene8259				gene8084	gene8084	gene7557		gene11852			gene2428	gene6054	gene7058	gene4023	gene8465	gene9855				gene4192	gene9887	gene8744		gene9114		gene9659
		GB41985	GB47503	GB49373			GB49347	GB48690		gene11847	gene6732	gene6732	gene8259				gene8095	gene8095	gene7558		gene11854			gene2429	gene6067	gene7086	gene4040	gene8498	gene9882				gene4214	gene9896	gene8761		gene913		gene9662
		GB41988	GB47553	GB49373			GB49348	GB48698		gene11850	gene6774	gene6774	gene8289				gene8095	gene8095	gene7579		gene11857			gene243	gene607	gene7093	gene4040	gene8514	gene9902				gene4241	gene9897	gene8782		gene9161		gene9736
		GB42014	GB47581	GB49373			GB49356	GB48829		gene11852	gene6775	gene6775	gene829				gene8095	gene8095	gene7593		gene11887			gene2433	gene6099	gene710	gene4070	gene8523	gene9905				gene4241	gene994	gene8782		gene9175		gene9742
		GB42016	GB47584	GB49375			GB49397	GB48832		gene11854	gene6788	gene6788	gene8315				gene8153	gene8153	gene7657		gene11888			gene2435	gene610	gene7116	gene4098	gene8537	gene9983				gene4241	gene9972	gene8790		gene919		gene9793
		GB42021	GB47589	GB49407			GB49397	GB48837		gene11857	gene6797	gene6797	gene838				gene8166	gene8166	gene7657		gene11889			gene2443	gene6112	gene7218	gene4116	gene8577	gene9998				gene4244	gene9985	gene8803		gene920		gene9825
		GB42024	GB47604	GB49410			GB49404	GB48840		gene11887	gene6818	gene6818	gene8437				gene8224	gene8224	gene7667		gene11892			gene2448	gene6128	gene7235	gene4122	gene859					gene426	gene9987	gene8835		gene9202		gene9831
		GB42031	GB47638	GB49418			GB49484	GB48840		gene11888	gene6880	gene6880	gene8448				gene8234	gene8234	gene7684		gene11893			gene2466	gene6162	gene7262	gene4127	gene859					gene4260		gene8855		gene9209		gene9855
		GB42032	GB47655	GB49425			GB49497	GB48840		gene11889	gene6910	gene6910	gene8568				gene8281	gene8281	gene7709		gene11895			gene2499	gene6173	gene7272	gene4136	gene8611					gene4267		gene8927		gene9260		gene9882
		GB42038	GB47678	GB49435			GB49505	GB48846		gene11892	gene6929	gene6929	gene8711				gene833	gene833	gene7709		gene11897			gene2523	gene6176	gene730	gene414	gene862					gene4279		gene898		gene9276		gene9972
		GB42039	GB47679	GB49481			GB49543	GB48852		gene11893	gene6944	gene6944	gene8744				gene8339	gene8339	gene7752		gene11900			gene2552	gene6189	gene7342	gene4164	gene8675					gene430		gene8993		gene9316		gene9983
		GB42043	GB47736	GB49498			GB49544	GB48894		gene11895	gene696	gene696	gene8761				gene8415	gene8415	gene7775		gene11910			gene2598	gene6216	gene735	gene4171	gene8697					gene4304		gene9076		gene9325		gene9985
		GB42057	GB47747	GB49504			GB49548	GB48904		gene11897	gene698	gene698	gene8778				gene8429	gene8429	gene7788		gene11915			gene2602	gene6219	gene7362	gene4177	gene8706					gene4328		gene908		gene9382		gene9987
		GB42064	GB47768	GB49511			GB49553	GB48940		gene11900	gene699	gene699	gene8782				gene8429	gene8429	gene7804		gene11918			gene2611	gene6227	gene740	gene4189	gene8727					gene4335		gene9104		gene9409
		GB42076	GB47805	GB49534			GB49598	GB48960		gene11910	gene7	gene7	gene8782				gene8455	gene8455	gene784		gene11920			gene2612	gene6228	gene7404	gene4197	gene8792					gene4336		gene9126		gene9419
		GB42085	GB47815	GB49535			GB49629	GB48960		gene11915	gene7004	gene7004	gene8803				gene8461	gene8461	gene7851		gene11924			gene2622	gene6230	gene7415	gene4212	gene8813					gene434		gene913		gene942
		GB42110	GB47876	GB49549			GB49642	GB48983		gene11918	gene7009	gene7009	gene8830				gene8465	gene8465	gene7851		gene11926			gene2677	gene6237	gene7463	gene4214	gene8824					gene4345		gene9136		gene9428
		GB42138	GB47880	GB49570			GB49648	GB48999		gene11920	gene707	gene707	gene8835				gene8489	gene8489	gene7851		gene11933			gene2693	gene6261	gene747	gene4244	gene8850					gene4347		gene9143		gene9431
		GB42139	GB47904	GB49590			GB49672	GB49004		gene11924	gene7082	gene7082	gene8855				gene8498	gene8498	gene786		gene11939			gene27	gene6265	gene7470	gene426	gene8873					gene437		gene9202		gene9435
		GB42140	GB47939	GB49601			GB49688	GB49026		gene11926	gene7085	gene7085	gene8901				gene8514	gene8514	gene7866		gene11942			gene2705	gene6359	gene7487	gene4260	gene8888					gene4380		gene9209		gene9462
		GB42141	GB47977	GB49640			GB49688	GB49069		gene11933	gene7138	gene7138	gene8927				gene8523	gene8523	gene7876		gene11952			gene2723	gene6364	gene7640	gene4260	gene8933					gene4384		gene9276		gene9467
		GB42143	GB47977	GB49726			GB49746	GB49093		gene11939	gene7180	gene7180	gene898				gene8552	gene8552	gene7933		gene11956			gene2746	gene6366	gene7645	gene4260	gene8940					gene4421		gene9278		gene9492
		GB42145	GB47977	GB49738			GB49757	GB49131		gene11942	gene7194	gene7194	gene8993				gene8577	gene8577	gene7937		gene11958			gene2752	gene6369	gene7647	gene4267	gene8987					gene4430		gene9382		gene9515
		GB42147	GB47998	GB49769			GB49773	GB49146		gene11952	gene7198	gene7198	gene9076				gene859	gene859	gene7974		gene1197			gene2757	gene6370	gene7657	gene4267	gene9041					gene4442		gene942		gene9519
		GB42150	GB48027	GB49806			GB49785	GB49167		gene11956	gene722	gene722	gene908				gene8611	gene8611	gene7984		gene11971			gene2759	gene6379	gene7661	gene4279	gene9049					gene4459		gene9430		gene9523
		GB42152	GB48105	GB49806			GB49801	GB49180		gene11958	gene7221	gene7221	gene9094				gene862	gene862	gene7984		gene11982			gene2763	gene6385	gene7665	gene4290	gene9072					gene4463		gene9430		gene953
		GB42155	GB48111	GB49853			GB49812	GB49223		gene1197	gene7262	gene7262	gene9103				gene8675	gene8675	gene7989		gene11985			gene2774	gene6395	gene7670	gene4304	gene9072					gene4489		gene9435		gene9569
		GB42161	GB48145	GB49949			GB49826	GB49224		gene11971	gene7280	gene7280	gene9126				gene8697	gene8697	gene7990		gene11994			gene2778	gene6406	gene7681	gene4328	gene9072					gene4495		gene9462		gene9608
		GB42167	GB48156	GB49960			GB49915	GB49239		gene11982	gene7321	gene7321	gene913				gene8706	gene8706	gene8034		gene1200			gene2781	gene6410	gene7682	gene4336	gene9072					gene4511		gene9466		gene9641
		GB42169	GB48157	GB49966			GB49933	GB49239		gene11985	gene7330	gene7330	gene9143				gene8727	gene8727	gene807		gene12005			gene2795	gene642	gene769	gene434	gene9090					gene4512		gene9470		gene9659
		GB42172	GB48195	GB49977			GB49970	GB49247		gene11994	gene7330	gene7330	gene9202				gene8813	gene8813	gene8070		gene12008			gene2798	gene6489	gene7696	gene4345	gene9097					gene4512		gene9488		gene9662
		GB42175	GB48215	GB50048			GB49993	GB49247		gene1200	gene7332	gene7332	gene9209				gene8824	gene8824	gene8115		gene12016			gene2800	gene6513	gene7701	gene4347	gene9114					gene4564		gene9492		gene9736
		GB42183	GB48233	GB50090			GB49999	GB49248		gene12005	gene7342	gene7342	gene9243				gene8850	gene8850	gene8115		gene12027			gene2804	gene6519	gene7709	gene4348	gene9114					gene4571		gene95		gene9742
		GB42184	GB48236	GB50142			GB50009	GB49283		gene12008	gene7409	gene7409	gene9276				gene8873	gene8873	gene8121		gene12028			gene283	gene6550	gene7732	gene4363	gene914					gene4578		gene9519		gene9787
		GB42188	GB48244	GB50150			GB50010	GB49320		gene12016	gene7415	gene7415	gene9382				gene8888	gene8888	gene8124		gene1203			gene2831	gene6571	gene7756	gene437	gene9161					gene4587		gene953		gene9793
		GB42192	GB48247	GB50159			GB50018	GB49373		gene12027	gene7435	gene7435	gene942				gene8904	gene8904	gene8141		gene12030			gene2839	gene658	gene7757	gene4380	gene9175					gene4615		gene9531		gene9812
		GB42194	GB48251	GB50192			GB50083	GB49373		gene12028	gene7469	gene7469	gene9430				gene8933	gene8933	gene8172		gene12041			gene2845	gene6588	gene7761	gene4384	gene919					gene463		gene9533		gene9855
		GB42195	GB48308	GB50247			GB50102	GB49373		gene1203	gene7469	gene7469	gene9430				gene8940	gene8940	gene8184		gene12047			gene2857	gene663	gene7767	gene4416	gene9196					gene463		gene9608		gene9882
		GB42196	GB48366	GB50262			GB50105	GB49375		gene12030	gene7538	gene7538	gene9435				gene8992	gene8992	gene8191		gene12049			gene2877	gene6636	gene777	gene4430	gene9197					gene463		gene9659		gene9972
		GB42200	GB48382	GB50301			GB50142	GB49396		gene12041	gene7555	gene7555	gene9462				gene9041	gene9041	gene8191		gene1205			gene2897	gene6639	gene7786	gene4432	gene920					gene4652		gene9662		gene9983
		GB42201	GB48382	GB50373			GB50175	GB49407		gene12047	gene7556	gene7556	gene9470				gene9049	gene9049	gene8202		gene12055			gene2898	gene6643	gene7804	gene4442	gene9260					gene4665		gene9683		gene9985
		GB42202	GB48385	GB50397			GB50175	GB49410		gene12049	gene7681	gene7681	gene9491				gene9070	gene9070	gene8229		gene12057			gene2922	gene665	gene784	gene4463	gene9316					gene4669		gene9742		gene9987
		GB42207	GB48500	GB50409			GB50179	GB49418		gene1205	gene7695	gene7695	gene9492				gene9072	gene9072	gene8289		gene12059			gene2933	gene6657	gene786	gene4478	gene9325					gene4675		gene9855
		GB42216	GB48534	GB50411			GB50183	GB49425		gene12055	gene7725	gene7725	gene95				gene9072	gene9072	gene8315		gene12062			gene2935	gene6658	gene7865	gene4495	gene9342					gene4682		gene9855
		GB42220	GB48557	GB50455			GB50196	GB49435		gene12057	gene7733	gene7733	gene9519				gene9089	gene9089	gene838		gene12063			gene2989	gene668	gene7869	gene4495	gene935					gene4686		gene9855
		GB42224	GB48574	GB50516			GB50207	GB49487		gene12059	gene7734	gene7734	gene953				gene9097	gene9097	gene8568		gene12104			gene3	gene6698	gene7873	gene4511	gene9361					gene473		gene9882
		GB42233	GB48600	GB50516			GB50226	GB49504		gene12062	gene7735	gene7735	gene9531				gene9114	gene9114	gene8744		gene1211			gene3000	gene6717	gene7876	gene4511	gene9395					gene4758		gene9902
		GB42241	GB48608	GB50587			GB50236	GB49511		gene12063	gene7751	gene7751	gene9533				gene9114	gene9114	gene8761		gene12111			gene3014	gene6747	gene7899	gene4564	gene9399					gene4765		gene9905
		GB42249	GB48623	GB50626			GB50242	GB49534		gene12074	gene7761	gene7761	gene9608				gene914	gene914	gene8778		gene12118			gene3027	gene6757	gene7910	gene4571	gene9409					gene4767		gene9983
		GB42252	GB48669	GB50640			GB50286	GB49535		gene12104	gene778	gene778	gene9659				gene9148	gene9148	gene8782		gene12120			gene3034	gene6758	gene7925	gene4578	gene9419					gene4798		gene9998
		GB42260	GB48748	GB50690			GB50303	GB49570		gene1211	gene7809	gene7809	gene9662				gene9175	gene9175	gene8782		gene12126			gene3041	gene6760	gene7934	gene4587	gene9428					gene4802
		GB42264	GB48748	GB50699			GB50344	GB49590		gene12111	gene7867	gene7867	gene9742				gene9196	gene9196	gene8790		gene1213			gene3052	gene6771	gene7963	gene4587	gene9431					gene4803
		GB42266	GB48772	GB50718			GB50360	GB49601		gene12118	gene7869	gene7869	gene9750				gene9197	gene9197	gene8803		gene12134			gene3053	gene6781	gene7984	gene463	gene9467					gene4823
		GB42268	GB48784	GB50832			GB50390	GB49726		gene12120	gene7883	gene7883	gene9787				gene922	gene922	gene8830		gene12152			gene3058	gene6788	gene7986	gene463	gene9512					gene4853
		GB42271	GB48790	GB50857			GB50447	GB49778		gene12126	gene7900	gene7900	gene9811				gene9260	gene9260	gene8835		gene12155			gene3068	gene6792	gene7989	gene4641	gene9515					gene4853
		GB42295	GB48836	GB50906			GB50455	GB49804		gene1213	gene7909	gene7909	gene9855				gene9342	gene9342	gene8855		gene12157			gene3094	gene6807	gene7999	gene4650	gene9523					gene4908
		GB42297	GB48926	GB50929			GB50470	GB49806		gene12134	gene7935	gene7935	gene9855				gene935	gene935	gene8901		gene12161			gene31	gene684	gene800	gene4665	gene9569					gene4916
		GB42300	GB48937	GB50941			GB50516	GB49806		gene12152	gene7971	gene7971	gene9855				gene9353	gene9353	gene8927		gene12163			gene3104	gene6842	gene807	gene4675	gene9578					gene4925
		GB42312	GB48961	GB50942			GB50519	GB49853		gene12155	gene8071	gene8071	gene9882				gene9361	gene9361	gene898		gene12165			gene3115	gene6866	gene8070	gene4686	gene9596					gene4966
		GB42318	GB48974	GB50942			GB50572	GB49857		gene12157	gene8071	gene8071	gene9902				gene9395	gene9395	gene8993		gene12167			gene3129	gene6907	gene8071	gene4758	gene963					gene4971
		GB42319	GB49013	GB50945			GB50597	GB49957		gene12161	gene8084	gene8084	gene9905				gene9428	gene9428	gene9073		gene12169			gene3131	gene6915	gene8095	gene4765	gene9641					gene4973
		GB42323	GB49047	GB50949			GB50646	GB49966		gene12163	gene8095	gene8095	gene9983				gene9431	gene9431	gene9076		gene12173			gene3156	gene6926	gene811	gene4766	gene9736					gene5013
		GB42326	GB49124	GB51002			GB50675	GB50048		gene12165	gene8095	gene8095	gene9998				gene9467	gene9467	gene908		gene12175			gene3179	gene6959	gene8131	gene4767	gene9736					gene5061
		GB42332	GB49165	GB51014			GB50679	GB50048		gene12167	gene8095	gene8095					gene9512	gene9512	gene9103		gene12193			gene318	gene6965	gene8162	gene4798	gene9793					gene5061
		GB42334	GB49207	GB51045			GB50688	GB50048		gene12169	gene8166	gene8166					gene9515	gene9515	gene9104		gene12198			gene3202	gene698	gene8166	gene4802	gene9812					gene508
		GB42352	GB49226	GB51045			GB50693	GB50048		gene12173	gene8215	gene8215					gene9523	gene9523	gene9126		gene12200			gene3213	gene699	gene8184	gene4803	gene987					gene5111
		GB42354	GB49233	GB51048			GB50730	GB50048		gene12175	gene8224	gene8224					gene9569	gene9569	gene913		gene12208			gene3218	gene6995	gene8187	gene4823	gene9887					gene5166
		GB42355	GB49233	GB51050			GB50739	GB50048		gene12193	gene8281	gene8281					gene9578	gene9578	gene9134		gene12210			gene3229	gene7019	gene8197	gene4847	gene9887					gene5202
		GB42356	GB49244	GB51071			GB50784	GB50090		gene12198	gene833	gene833					gene963	gene963	gene9136		gene12233			gene323	gene7033	gene8202	gene4853	gene9896					gene5212
		GB42360	GB49309	GB51072			GB50800	GB50142		gene12200	gene8375	gene8375					gene9641	gene9641	gene9143		gene12235			gene3236	gene7034	gene8209	gene4853	gene9897					gene5230
		GB42365	GB49311	GB51088			GB50866	GB50150		gene12208	gene8415	gene8415					gene9652	gene9652	gene9202		gene1224			gene3240	gene7057	gene8210	gene4879	gene9940					gene5237
		GB42372	GB49312	GB51088			GB50869	GB50159		gene12210	gene8429	gene8429					gene9736	gene9736	gene9209		gene12248			gene3253	gene7082	gene8211	gene4908	gene9972					gene5237
		GB42374	GB49321	GB51110			GB50874	GB50160		gene12233	gene8429	gene8429					gene9793	gene9793	gene9276		gene12251			gene327	gene7085	gene822	gene4925	gene9985					gene5237
		GB42375	GB49347	GB51190			GB50883	GB50192		gene12235	gene8455	gene8455					gene9825	gene9825	gene9278		gene12264			gene328	gene709	gene8223	gene4966	gene9987					gene5250
		GB42378	GB49397	GB51264			GB50947	GB50207		gene1224	gene8461	gene8461					gene9831	gene9831	gene9382		gene12270			gene3280	gene7126	gene823	gene4973						gene5265
		GB42379	GB49397	GB51284			GB50962	GB50214		gene12248	gene8465	gene8465					gene987	gene987	gene942		gene12271			gene3284	gene7163	gene8258	gene4996						gene5276
[truncated: 2,383 more rows]
[truncated: 2 more columns]

## Sheet: Mgen_1
Mgen_1		Jones et al. All_tested	Jones QvsW	Jones Q>W	Jones W>Q	Converted:	Jones et al. All_tested	Jones QvsW	Jones Q>W	Jones W>Q		Shared Universe		IN	FvsL	F>L	L>F	Jones QvsW	Jones Q>W	Jones W>Q	Overlaps:	FvsL QvsW	F>L Q>W	F>L W>Q	L>F Q>W	L>F W>Q
[truncated: 16,245 more rows]

[truncated: 6 more sheets: Pmet_1, Comp_1, Comp_2, Comp_3, Conversion_Lists, Glycolysis-Gluconeogensis]
